# Supplementary material
Source: PubMed Central journal article supplement (PMC6986563)
Supplement: NIHMS1065139-supplement-Supplementary_Table_1.pdf [file NIHMS1065139-supplement-Supplementary_Table_1.pdf]

**Supplemental Table 1. 10,177 non-synonymous single nucleotide polymorphisms on ParAllele panel;  
the San Francisco Bay Area Adult Glioma Study**

| Reference Sequence<br>Number | Gene Symbol    | Alleles | Chromosomal<br>Location | Minor Allele | Minor Allele<br>Frequency,<br>Case | Minor Allele<br>Frequency,<br>Control | P-value* |
|------------------------------|----------------|---------|-------------------------|--------------|------------------------------------|---------------------------------------|----------|
| rs8289                       | FUT6, M6PRBP1  | A/G     | 19p                     | A            | 0.357798165                        | 0.188073394                           | 0.000141 |
| rs10495960                   | LHCGR, GTF2A1L | A/G     | 02p                     | A            | 0.102678571                        | 0.245454545                           | 0.000145 |
| rs1195889                    | GPR133         | A/G     | 12q                     | A            | 0.339285714                        | 0.495495495                           | 0.000547 |
| rs11076585                   |                | C/T     | 16q                     | T            | 0.147321429                        | 0.290178571                           | 0.00055  |
| rs10415562                   | OR7C1          | C/T     | 19p                     | C            | 0.294642857                        | 0.183035714                           | 0.000805 |
| rs7955866                    | FGF23          | A/G     | 12p                     | A            | 0.163636364                        | 0.049549549                           | 0.001078 |
| rs3765083                    | MFSD1          | A/G     | 03q                     | A            | 0.486607143                        | 0.339285714                           | 0.001137 |
| rs12455859                   |                | G/T     | 18p                     | G            | 0.473214286                        | 0.366071429                           | 0.001248 |
| rs3732548                    | hCG_1813818    | A/C     | 03p                     | C            | 0.21875                            | 0.357142857                           | 0.001609 |
| rs1047840                    | EXO1           | A/G     | 01q                     | A            | 0.321428571                        | 0.468181818                           | 0.002261 |
| rs10817025                   | SVEP1          | C/T     | 09q                     | C            | 0.403061224                        | 0.252747253                           | 0.002461 |
| rs1265054                    | C6orf15        | A/G     | 06p                     | A            | 0.382882883                        | 0.468468468                           | 0.002688 |
| rs319522                     | GPC6           | A/G     | 13q                     | G            | 0.40625                            | 0.455357143                           | 0.003242 |
| rs7522157                    | CLCC1, C1orf62 | C/T     | 01p                     | T            | 0.254464286                        | 0.382882883                           | 0.003275 |
| rs2017467                    |                | A/G     | 11q                     | A            | 0.068181818                        | 0.155963303                           | 0.003282 |
| rs4272850                    | TMEM132C       | A/G     | 12q                     | A            | 0.294642857                        | 0.178571429                           | 0.003348 |
| rs10490923                   | ARMS2          | A/G     | 10q                     | A            | 0.09375                            | 0.196428571                           | 0.003436 |
| rs1129770                    | CMYA5          | A/G     | 05q                     | A            | 0.142857143                        | 0.258928571                           | 0.003448 |
| rs2298771                    | SCN1A          | A/G     | 02q                     | G            | 0.361607143                        | 0.232142857                           | 0.003505 |
| rs6902416                    | TRDN           | C/G     | 06q                     | G            | 0.1875                             | 0.09009009                            | 0.004266 |
| rs2502601                    | SYNJ2          | C/T     | 06q                     | T            | 0.40625                            | 0.459821429                           | 0.0043   |
| rs4691212                    |                | G/T     | 04q                     | G            | 0.267857143                        | 0.392857143                           | 0.004421 |
| rs3734960                    | DPP6           | C/T     | 07q                     | C            | 0.34375                            | 0.218181818                           | 0.004809 |
| rs3817121                    | CAND2          | A/G     | 03p                     | A            | 0.245535714                        | 0.138392857                           | 0.005011 |
| rs12610412                   | ZNF77          | C/G     | 19p                     | G            | 0.169642857                        | 0.080357143                           | 0.005096 |
| rs2296308                    | RWDD3          | G/T     | 01p                     | T            | 0.171171171                        | 0.081081081                           | 0.005159 |
| rs266881                     | KLK3           | A/C     | 19q                     | A            | 0.440366973                        | 0.41588785                            | 0.005503 |
| rs1046116                    | PKP2           | C/T     | 12p                     | C            | 0.27027027                         | 0.160714286                           | 0.005733 |
| rs2747701                    | FAM135A        | A/G     | 06q                     | A            | 0.433035714                        | 0.441441441                           | 0.006122 |
| rs4801958                    | ZNF665         | C/T     | 19q                     | C            | 0.455357143                        | 0.328828829                           | 0.006323 |
| rs3177253                    | PECI           | A/G     | 06p                     | A            | 0.223214286                        | 0.339285714                           | 0.006341 |
| rs6949654                    | tcag7.1314     | C/T     | 07q                     | T            | 0.178571429                        | 0.089285714                           | 0.006551 |

|            |             |     |     |   |             |             |          |
|------------|-------------|-----|-----|---|-------------|-------------|----------|
| rs3803704  | FLJ11171    | A/G | 16q | G | 0.321428571 | 0.205357143 | 0.006644 |
| rs7022771  |             | A/C | 09q | A | 0.291262136 | 0.41509434  | 0.006828 |
| rs10911825 | HMCN1       | A/G | 01q | G | 0.325892857 | 0.214285714 | 0.006939 |
| rs12360890 | OR5T1       | A/G | 11q | G | 0.459821429 | 0.325892857 | 0.007113 |
| rs843971   | PGLYRP3     | A/G | 01q | A | 0.297297297 | 0.419642857 | 0.007251 |
| rs1265053  | C6orf15     | C/G | 06p | C | 0.341121495 | 0.476635514 | 0.007562 |
| rs1657133  |             | A/G | 16p | G | 0.133027523 | 0.229357798 | 0.007829 |
| rs10845293 | TAS2R44     | A/G | 12p | A | 0.416666667 | 0.462616822 | 0.007847 |
| rs709564   | CCDC54      | A/G | 03q | A | 0.196428571 | 0.299107143 | 0.008181 |
| rs799661   |             | A/G | 14q | A | 0.068807339 | 0.138392857 | 0.008647 |
| rs2862954  | ERLIN1      | C/T | 10q | T | 0.397321429 | 0.473214286 | 0.008824 |
| rs12460170 | ZNF665      | A/G | 19q | A | 0.45045045  | 0.330357143 | 0.009014 |
| rs10896271 | OR8K1       | A/G | 11q | G | 0.455357143 | 0.325892857 | 0.009332 |
| rs998544   | OR5R1       | C/T | 11q | T | 0.455357143 | 0.325892857 | 0.009332 |
| rs511987   |             | A/G | 11q | G | 0.446428571 | 0.321428571 | 0.009383 |
| rs10028124 | SCLT1       | A/T | 04q | T | 0.397321429 | 0.279279279 | 0.009603 |
| rs1742429  | C16orf73    | C/T | 16p | C | 0.126126126 | 0.21875     | 0.009638 |
| rs8097835  |             | A/G | 18q | A | 0.383928571 | 0.490990991 | 0.009657 |
| rs7226913  | OSBPL1A     | C/T | 18q | C | 0.40625     | 0.473214286 | 0.009687 |
| rs3123101  | VIL2, SYTL3 | A/T | 06q | T | 0.325892857 | 0.214285714 | 0.009707 |
| rs1421217  |             | C/T | 08q | C | 0.482142857 | 0.396396396 | 0.009864 |
| rs7000148  | C8orf68     | C/G | 08p | C | 0.415178571 | 0.290178571 | 0.009871 |
| rs6235     | PCSK1       | C/G | 05q | C | 0.223214286 | 0.339285714 | 0.01003  |
| rs4590080  | LIMCH1      | C/G | 04p | C | 0.072072072 | 0.013513513 | 0.010241 |
| rs2014576  | SIX5        | C/T | 19q | C | 0.387387387 | 0.490990991 | 0.010394 |
| rs911391   |             | A/C | 16p | A | 0.133027523 | 0.227678571 | 0.010747 |
| rs1056320  | MGC24039    | A/C | 12p | A | 0.160714286 | 0.075892857 | 0.010755 |
| rs2022923  | MGC39715    | A/G | 08q | G | 0.355855856 | 0.472972973 | 0.010953 |
| rs3783941  | TSHR        | G/T | 14q | G | 0.400900901 | 0.285714286 | 0.011044 |
| rs10888390 | CTSS        | A/G | 01q | A | 0.303571429 | 0.424107143 | 0.011053 |
| rs2242373  | FLJ35773    | C/T | 17p | T | 0.125       | 0.214285714 | 0.011096 |
| rs4555873  |             | C/T | 05q | T | 0.378378378 | 0.258928571 | 0.011157 |
| rs3118574  |             | A/G | 09q | A | 0.272321429 | 0.382882883 | 0.01122  |
| rs3806692  | LOC401068   | C/G | 03p | C | 0.129464286 | 0.058035714 | 0.011288 |
| rs9639168  | ETV1        | C/T | 07p | C | 0.294642857 | 0.410714286 | 0.01153  |
| rs12115750 | LOC402377   | A/C | 09q | A | 0.085585586 | 0.160714286 | 0.011651 |
| rs1935     | JMJD1C      | C/G | 10q | G | 0.436936937 | 0.449074074 | 0.011651 |

|            |           |     |     |   |             |             |          |
|------------|-----------|-----|-----|---|-------------|-------------|----------|
| rs2458236  | DUOX1     | C/T | 15q | C | 0.413636364 | 0.296296296 | 0.012023 |
| rs2898904  |           | A/G | 11p | G | 0.439814815 | 0.327102804 | 0.012136 |
| rs5748648  | XKR3      | A/G | 22q | A | 0.107142857 | 0.045045045 | 0.012189 |
| rs12096753 | TRIM67    | C/T | 01q | C | 0.111607143 | 0.205357143 | 0.012308 |
| rs3813636  | C1orf49   | G/T | 01q | G | 0.469072165 | 0.403061224 | 0.012503 |
| rs649058   | TNNI3K    | A/G | 01p | G | 0.491071429 | 0.397321429 | 0.012544 |
| rs9806945  | C16orf73  | A/G | 16p | G | 0.131818182 | 0.223214286 | 0.01258  |
| rs1553316  | HAVCR1    | C/T | 05q | T | 0.09375     | 0.174107143 | 0.01259  |
| rs2285374  |           | A/G | 11q | G | 0.450892857 | 0.333333333 | 0.012642 |
| rs8030587  | STARD9    | A/G | 15q | A | 0.265765766 | 0.169642857 | 0.012652 |
| rs1291212  | ZGPAT     | C/G | 20q | C | 0.09009009  | 0.032110092 | 0.012993 |
| rs1006954  | ZZEF1     | C/T | 17p | T | 0.081081081 | 0.15625     | 0.013052 |
| rs10825269 | PCDH15    | C/T | 10q | T | 0.080357143 | 0.15625     | 0.013123 |
| rs10022054 | LOC402175 | A/G | 04p | G | 0.125       | 0.053571429 | 0.013395 |
| rs8023524  | CDAN1     | A/G | 15q | A | 0.235576923 | 0.136792453 | 0.013523 |
| rs2045571  | FCGR2B    | C/T | 01q | T | 0.089622642 | 0.164948454 | 0.013544 |
| rs560389   |           | A/G | 01p | A | 0.263392857 | 0.370535714 | 0.013678 |
| rs12568310 | FLJ35530  | C/T | 01q | T | 0.446428571 | 0.333333333 | 0.013762 |
| rs2274756  | MMP9      | A/G | 20q | A | 0.116071429 | 0.202702703 | 0.013772 |
| rs9532758  | MTRF1     | C/T | 13q | C | 0.108108108 | 0.040178571 | 0.013823 |
| rs1065838  | C16orf45  | C/T | 16p | C | 0.316513761 | 0.213636364 | 0.013829 |
| rs2637777  | FAT       | G/T | 04q | G | 0.325892857 | 0.446428571 | 0.01394  |
| rs10904481 | UCN3      | A/G | 10p | G | 0.370535714 | 0.261261261 | 0.014251 |
| rs1381657  | CENPE     | C/G | 04q | G | 0.217592593 | 0.135135135 | 0.014263 |
| rs6234     | PCSK1     | C/G | 05q | G | 0.225225225 | 0.336363636 | 0.014507 |
| rs10817479 | WDR31     | A/G | 09q | A | 0.095454545 | 0.036036036 | 0.014973 |
| rs2306595  | MYOHD1    | C/T | 17q | C | 0.086363636 | 0.03125     | 0.015081 |
| rs2306175  | C4orf26   | A/G | 04q | A | 0.169642857 | 0.263392857 | 0.015123 |
| rs227787   | OR3A3     | C/T | 17p | C | 0.205357143 | 0.301801802 | 0.015262 |
| rs1801516  | ATM       | A/G | 11q | A | 0.098214286 | 0.183035714 | 0.015312 |
| rs2208525  |           | G/T | 20q | T | 0.207207207 | 0.303571429 | 0.015664 |
| rs2280544  | BET1L     | C/T | 11p | T | 0.207207207 | 0.303571429 | 0.015678 |
| rs6983981  | C8orf68   | A/C | 08p | C | 0.387387387 | 0.272321429 | 0.015777 |
| rs3213831  | PZP       | C/T | 12p | T | 0.385321101 | 0.5         | 0.01587  |
| rs12568050 | ZNF648    | C/G | 01q | C | 0.189189189 | 0.110091743 | 0.016023 |
| rs4245199  | PVRL1     | G/T | 11q | G | 0.117117117 | 0.054545454 | 0.016052 |
| rs710187   | GCAT      | C/T | 22q | C | 0.482142857 | 0.403669725 | 0.016496 |

|            |                 |     |     |   |             |             |          |
|------------|-----------------|-----|-----|---|-------------|-------------|----------|
| rs10836399 | OR51D1          | C/G | 11p | C | 0.165178571 | 0.258928571 | 0.016558 |
| rs11230600 | OR4C6           | C/T | 11q | C | 0.339285714 | 0.232142857 | 0.016685 |
| rs1459101  | OR4C16          | A/G | 11q | A | 0.339285714 | 0.232142857 | 0.016685 |
| rs4987236  |                 | A/G | 08p | A | 0.072072072 | 0.022522522 | 0.016757 |
| rs7811042  | CCDC129         | A/C | 07p | C | 0.368686869 | 0.260869565 | 0.016823 |
| rs2266988  | PRAME           | A/G | 22q | A | 0.352678571 | 0.464285714 | 0.016995 |
| rs2280205  | SLC2A9          | A/G | 04p | G | 0.49537037  | 0.390909091 | 0.017326 |
| rs3823430  | DNAH8           | C/T | 06p | C | 0.111607143 | 0.191964286 | 0.017409 |
| rs10816    | C13orf28        | A/T | 13q | A | 0.45045045  | 0.342342342 | 0.017653 |
| rs1051624  | CDH17           | A/C | 08q | A | 0.473214286 | 0.405405405 | 0.01772  |
| rs3817672  | TFRC            | A/G | 03q | G | 0.5         | 0.391891892 | 0.017722 |
| rs1805127  | KCNE1           | A/G | 21q | A | 0.308035714 | 0.419642857 | 0.017774 |
| rs9850805  |                 | A/C | 03q | A | 0.252252252 | 0.36036036  | 0.018056 |
| rs627933   |                 | C/T | 11q | C | 0.245535714 | 0.351351351 | 0.018572 |
| rs4949211  |                 | C/T | 01p | C | 0.477272727 | 0.405660377 | 0.019046 |
| rs3798130  | KIF3A           | A/G | 05q | A | 0.118181818 | 0.200892857 | 0.019145 |
| rs447802   | FAM83E          | C/T | 19q | C | 0.211711712 | 0.304545454 | 0.019167 |
| rs2372536  | ATIC            | C/G | 02q | G | 0.267857143 | 0.375       | 0.019415 |
| rs626251   | C1orf87         | C/T | 01p | C | 0.364864865 | 0.482142857 | 0.019488 |
| rs4902695  |                 | C/T | 14q | T | 0.223214286 | 0.321428571 | 0.019609 |
| rs1151625  | LIME1, SLC2A4RG | C/T | 20q | T | 0.089285714 | 0.035714286 | 0.019707 |
| rs9394866  | FLJ90086        | A/G | 06p | G | 0.459821429 | 0.433035714 | 0.020243 |
| rs3733242  | SHROOM3         | A/G | 04q | A | 0.357142857 | 0.46875     | 0.020391 |
| rs966365   | EDARADD         | C/T | 01q | C | 0.133928571 | 0.214285714 | 0.020476 |
| rs10851704 | VPS13C          | C/T | 15q | T | 0.424107143 | 0.463963964 | 0.020719 |
| rs2074469  | OR10C1          | A/G | 06p | G | 0.165178571 | 0.254464286 | 0.020745 |
| rs10076911 | FLJ13231        | A/C | 05p | C | 0.160714286 | 0.089285714 | 0.020984 |
| rs648614   | TNNI3K          | C/T | 01p | C | 0.477678571 | 0.418918919 | 0.021553 |
| rs2609881  | ZNF228          | A/C | 19q | C | 0.085585586 | 0.160714286 | 0.021965 |
| rs10078391 | DNAH5           | C/T | 05p | C | 0.160714286 | 0.245535714 | 0.022032 |
| rs365990   | MYH6            | A/G | 14q | G | 0.330357143 | 0.436363636 | 0.022069 |
| rs6428538  |                 | A/G | 01p | A | 0.071428571 | 0.138392857 | 0.022254 |
| rs2799123  |                 | C/G | 09p | G | 0.400900901 | 0.292792793 | 0.022384 |
| rs2799125  |                 | C/T | 09p | T | 0.401785714 | 0.294642857 | 0.022399 |
| rs10146482 | NEK9            | C/T | 14q | T | 0.472972973 | 0.414414414 | 0.023071 |
| rs2836662  | C21orf24        | A/T | 21q | A | 0.279279279 | 0.376146789 | 0.023109 |
| rs2276976  | NHEDC2          | A/C | 04q | C | 0.133928571 | 0.071428571 | 0.023197 |

|            |                  |     |     |   |             |             |          |
|------------|------------------|-----|-----|---|-------------|-------------|----------|
| rs11230864 |                  | C/T | 11q | T | 0.454954955 | 0.34375     | 0.023216 |
| rs2293172  | GIMAP4           | A/C | 07q | A | 0.116071429 | 0.189189189 | 0.02336  |
| rs10017772 | DCHS2            | C/T | 04q | C | 0.459821429 | 0.433035714 | 0.023585 |
| rs7032785  | JAK2             | C/T | 09p | C | 0.4375      | 0.454954955 | 0.023589 |
| rs9616310  |                  | C/G | 22q | G | 0.330357143 | 0.433035714 | 0.023786 |
| rs11024970 | MRGPRX2          | G/T | 11p | G | 0.080357143 | 0.03125     | 0.02381  |
| rs1110627  | DLL3             | A/G | 19q | A | 0.446428571 | 0.446428571 | 0.0247   |
| rs376618   | FGFR4            | A/G | 05q | G | 0.308411215 | 0.213636364 | 0.024724 |
| rs2231926  | FLJ10213, PPP4R2 | A/G | 03p | A | 0.495454546 | 0.391891892 | 0.024789 |
| rs3823603  | IQCE             | C/G | 07p | C | 0.222727273 | 0.325892857 | 0.024807 |
| rs2486668  | GRHL3            | C/G | 01p | C | 0.198198198 | 0.117117117 | 0.024937 |
| rs10408247 | CEACAM20         | A/G | 19q | A | 0.142857143 | 0.075892857 | 0.025046 |
| rs3741845  | TAS2R9           | C/T | 12p | T | 0.444444444 | 0.341584158 | 0.02512  |
| rs2748404  | FLJ43860         | G/T | 08q | G | 0.261261261 | 0.352678571 | 0.025268 |
| rs7157977  |                  | C/T | 14q | T | 0.352678571 | 0.450450451 | 0.025358 |
| rs10120210 | ECM2, CENPP      | G/T | 09q | T | 0.481818182 | 0.372727273 | 0.025503 |
| rs11568658 | ABCC4            | G/T | 13q | T | 0.053571429 | 0.013392857 | 0.025575 |
| rs11698045 |                  | C/T | 20q | T | 0.379464286 | 0.482142857 | 0.02565  |
| rs2231924  | FLJ10213, PPP4R2 | C/T | 03p | T | 0.486607143 | 0.401785714 | 0.025691 |
| rs12458258 |                  | A/C | 18p | A | 0.409090909 | 0.303571429 | 0.025881 |
| rs4854028  |                  | G/T | 02q | T | 0.395454546 | 0.5         | 0.025898 |
| rs6591324  | OR5R1            | A/G | 11q | A | 0.247706422 | 0.346153846 | 0.025904 |
| rs3177751  | ETFB             | C/T | 19q | C | 0.5         | 0.392857143 | 0.026002 |
| rs7982868  |                  | A/G | 13q | G | 0.063063063 | 0.017857143 | 0.026365 |
| rs2073347  | NIN              | C/T | 14q | C | 0.258928571 | 0.169642857 | 0.026626 |
| rs351260   | KIAA0141         | C/T | 05q | T | 0.333333333 | 0.433962264 | 0.026774 |
| rs7318090  |                  | A/G | 13q | A | 0.446428571 | 0.446428571 | 0.026976 |
| rs10794531 | ZNF683           | C/T | 01p | C | 0.31981982  | 0.227678571 | 0.027157 |
| rs2360543  | ZNF530           | A/T | 19q | A | 0.261261261 | 0.174107143 | 0.02743  |
| rs10045717 |                  | C/T | 05q | C | 0.446428571 | 0.450892857 | 0.027436 |
| rs1063193  | PRR4             | C/T | 12p | C | 0.495535714 | 0.392857143 | 0.027565 |
| rs6032259  |                  | A/G | 20q | A | 0.375       | 0.488888889 | 0.027603 |
| rs2848622  |                  | A/C | 11q | A | 0.463963964 | 0.353211009 | 0.027617 |
| rs11719086 | PARP14           | A/G | 03q | A | 0.258928571 | 0.171171171 | 0.02774  |
| rs4710457  | RP11-307F22.3    | C/T | 06q | T | 0.446428571 | 0.346846847 | 0.02815  |
| rs330880   | EMR1             | C/G | 19p | G | 0.27027027  | 0.370535714 | 0.028329 |
| rs2288523  | PTPRH            | G/T | 19q | T | 0.111607143 | 0.18018018  | 0.028374 |

|            |                  |     |     |   |             |             |          |
|------------|------------------|-----|-----|---|-------------|-------------|----------|
| rs1885987  | SMG6             | A/C | 17p | C | 0.370535714 | 0.477477478 | 0.028375 |
| rs3894194  | GSDM1            | C/T | 17q | C | 0.40625     | 0.491071429 | 0.028616 |
| rs1366842  | ZNF804A          | G/T | 02q | G | 0.482142857 | 0.383928571 | 0.028702 |
| rs2289519  | SERPINB5         | C/T | 18q | T | 0.256756757 | 0.354545455 | 0.02925  |
| rs3750228  | PRDM14           | C/T | 08q | C | 0.183035714 | 0.111607143 | 0.029283 |
| rs1060584  | FLJ10213, PPP4R2 | C/T | 03p | C | 0.486486487 | 0.402777778 | 0.029436 |
| rs12103986 | ALPK2            | A/C | 18q | C | 0.419642857 | 0.477678571 | 0.029617 |
| rs6493068  | TTBK2            | A/G | 15q | G | 0.357142857 | 0.261261261 | 0.029657 |
| rs3758490  | ZNF365           | G/T | 10q | G | 0.387387387 | 0.490990991 | 0.029736 |
| rs2504011  | C10orf68         | A/G | 10p | G | 0.490990991 | 0.388392857 | 0.03011  |
| rs7770557  | ZNRD1, C6orf12   | C/G | 06p | G | 0.120535714 | 0.063063063 | 0.030118 |
| rs1738254  | DNAH8            | C/T | 06p | T | 0.071428571 | 0.026785714 | 0.030157 |
| rs2918519  |                  | C/T | 03p | T | 0.12962963  | 0.196428571 | 0.030349 |
| rs3824250  | C8orf32          | C/T | 08q | T | 0.308035714 | 0.410714286 | 0.030812 |
| rs7014678  | C8orf32          | A/G | 08q | G | 0.308035714 | 0.410714286 | 0.030812 |
| rs6470147  | C8orf32          | A/T | 08q | A | 0.308035714 | 0.410714286 | 0.030812 |
| rs11024532 | MRGPRX4          | C/T | 11p | T | 0.321428571 | 0.234234234 | 0.030845 |
| rs835954   |                  | C/G | 10p | G | 0.46875     | 0.433035714 | 0.031017 |
| rs6999234  | C8orf32          | A/G | 08q | G | 0.301801802 | 0.404545455 | 0.031158 |
| rs2021248  |                  | C/T | 11p | T | 0.424107143 | 0.473214286 | 0.031253 |
| rs3743503  | CENPN            | A/C | 16q | C | 0.165178571 | 0.094594595 | 0.031263 |
| rs1463670  |                  | A/C | 12q | C | 0.080357143 | 0.147321429 | 0.0313   |
| rs2822432  | LIPI             | C/T | 21q | T | 0.314814815 | 0.412037037 | 0.031818 |
| rs12350212 | ZNF169           | C/G | 09q | C | 0.138888889 | 0.076923077 | 0.031864 |
| rs2070832  | ZNF23            | C/T | 16q | T | 0.235576923 | 0.331775701 | 0.031886 |
| rs2069561  | TG               | A/G | 08q | G | 0.46875     | 0.427927928 | 0.031959 |
| rs1217401  | AP4B1            | A/G | 01p | G | 0.299107143 | 0.397321429 | 0.032082 |
| rs3807598  |                  | C/G | 07p | G | 0.495535714 | 0.40625     | 0.032102 |
| rs10228331 |                  | A/C | 07q | A | 0.32        | 0.420560748 | 0.032639 |
| rs753856   | HSPA6            | C/G | 01q | C | 0.157657658 | 0.098214286 | 0.032646 |
| rs3809972  | ALPK2            | C/G | 18q | C | 0.427927928 | 0.46728972  | 0.032684 |
| rs1044498  | ENPP1            | A/C | 06q | C | 0.151785714 | 0.09009009  | 0.03281  |
| rs2042996  | TTN              | C/T | 02q | T | 0.22815534  | 0.144329897 | 0.032955 |
| rs4364923  |                  | C/T | 01p | C | 0.468468468 | 0.366071429 | 0.033205 |
| rs9287520  |                  | C/T | 02q | T | 0.151785714 | 0.229357798 | 0.033339 |
| rs12101356 | FLJ39743         | A/G | 15q | A | 0.09375     | 0.044642857 | 0.033647 |
| rs1889323  | SVEP1            | A/C | 09q | C | 0.21875     | 0.13963964  | 0.033691 |

|            |               |     |     |   |             |             |          |
|------------|---------------|-----|-----|---|-------------|-------------|----------|
| rs1569767  | SLC24A3       | A/G | 20p | G | 0.427927928 | 0.471428571 | 0.033758 |
| rs10817021 | SVEP1         | A/T | 09q | T | 0.21875     | 0.13963964  | 0.033863 |
| rs3762002  | FUCA2         | C/T | 06q | C | 0.200892857 | 0.286363636 | 0.034373 |
| rs1058396  | SLC14A1       | A/G | 18q | G | 0.454545454 | 0.449541284 | 0.034478 |
| rs11638390 | USP8          | A/G | 15q | G | 0.148648649 | 0.227678571 | 0.034633 |
| rs3088232  | BRDT          | C/G | 01p | C | 0.1875      | 0.272321429 | 0.034704 |
| rs3862618  | ROBO3         | C/T | 11q | T | 0.084821429 | 0.147321429 | 0.034786 |
| rs9311651  | DNAH7L        | A/G | 03p | G | 0.104545455 | 0.169642857 | 0.034883 |
| rs2074078  | ZNF154        | A/C | 19q | A | 0.084821429 | 0.147321429 | 0.035114 |
| rs10583    | TM9SF1        | A/G | 14q | A | 0.171171171 | 0.102678571 | 0.035148 |
| rs7575     | MRPL40        | A/G | 22q | A | 0.098214286 | 0.162162162 | 0.035171 |
| rs220159   | UMODL1        | C/T | 21q | T | 0.428571429 | 0.330357143 | 0.035283 |
| rs670741   | KRT74         | A/C | 12q | A | 0.282407407 | 0.2         | 0.03538  |
| rs2275477  | C1orf102      | C/T | 01p | T | 0.252252252 | 0.171171171 | 0.03557  |
| rs2241384  | LILRA4        | C/T | 19q | T | 0.138392857 | 0.214285714 | 0.035645 |
| rs4076700  | FBXW8         | C/T | 12q | C | 0.111607143 | 0.175675676 | 0.035662 |
| rs560191   | TP53BP1       | C/G | 15q | C | 0.372727273 | 0.279279279 | 0.035783 |
| rs3809973  | ALPK2         | A/C | 18q | C | 0.417431193 | 0.481981982 | 0.035816 |
| rs4653328  | EPHA10        | A/T | 01p | T | 0.279279279 | 0.196428571 | 0.035897 |
| rs1051221  | KIAA0143      | A/G | 08q | G | 0.466981132 | 0.435       | 0.036232 |
| rs1498467  | OR51M1        | G/T | 11p | T | 0.121621622 | 0.196428571 | 0.036302 |
| rs7940667  | PVRL1         | A/C | 11q | A | 0.111607143 | 0.058035714 | 0.036353 |
| rs7167256  | LOC650137     | C/T | 15q | C | 0.245535714 | 0.3125      | 0.036426 |
| rs7695741  |               | C/T | 04q | C | 0.098214286 | 0.169642857 | 0.036585 |
| rs11629584 |               | C/T | 15q | T | 0.403061224 | 0.489010989 | 0.036588 |
| rs404655   |               | C/T | 06p | T | 0.075757576 | 0.015151515 | 0.036616 |
| rs931606   | FRAS1         | A/G | 04q | G | 0.444444444 | 0.442857143 | 0.036661 |
| rs161557   | HMHB1         | C/T | 05q | T | 0.141509434 | 0.222727273 | 0.036832 |
| rs398607   | GALC          | A/G | 14q | A | 0.450450451 | 0.446428571 | 0.036867 |
| rs2839698  |               | C/T | 11p | C | 0.464285714 | 0.433035714 | 0.037329 |
| rs714774   | NCAPD2        | C/G | 12p | G | 0.357142857 | 0.263392857 | 0.037484 |
| rs2217332  | HERPUD1       | C/T | 16q | T | 0.202702703 | 0.131818182 | 0.037487 |
| rs3762001  | FUCA2         | A/G | 06q | A | 0.200892857 | 0.283783784 | 0.037543 |
| rs1043149  | EXOC7, LGICZ1 | A/G | 17q | A | 0.107142857 | 0.172727273 | 0.037714 |
| rs1336900  | HORMAD1       | A/G | 01q | A | 0.357142857 | 0.455357143 | 0.03772  |
| rs3747539  | FRMPD1        | A/C | 09p | C | 0.209821429 | 0.136363636 | 0.037739 |
| rs2613637  | FLJ43860      | C/T | 08q | T | 0.267857143 | 0.352678571 | 0.037796 |

|            |                      |     |     |   |             |             |          |
|------------|----------------------|-----|-----|---|-------------|-------------|----------|
| rs709682   | KIAA0090             | A/G | 01p | A | 0.089108911 | 0.028846154 | 0.037827 |
| rs2293275  | LHCGR, GTF2A1L       | A/G | 02p | A | 0.482142857 | 0.383928571 | 0.037893 |
| rs2302234  | FAM20A               | G/T | 17q | T | 0.346846847 | 0.254464286 | 0.038103 |
| rs7102536  | OR2AG2               | C/T | 11p | T | 0.191588785 | 0.118556701 | 0.038235 |
| rs1885434  | NRAP                 | A/G | 10q | A | 0.288288288 | 0.375       | 0.038302 |
| rs1376251  | TAS2R50              | C/T | 12p | T | 0.293577982 | 0.387387387 | 0.038352 |
| rs1959379  | C14orf155            | A/G | 14q | A | 0.121621622 | 0.0625      | 0.038621 |
| rs940389   | STON1, SALF          | C/G | 02p | C | 0.405405405 | 0.316964286 | 0.038742 |
| rs2294015  | ANXA13               | A/G | 08q | G | 0.364864865 | 0.454954955 | 0.0388   |
| rs1999627  |                      | A/G | 10q | A | 0.117117117 | 0.058035714 | 0.038821 |
| rs2303744  | PLA2G4C              | A/G | 19q | G | 0.190909091 | 0.274774775 | 0.039038 |
| rs7304761  |                      | C/G | 12p | C | 0.09009009  | 0.040178571 | 0.039149 |
| rs814873   | LOC646425            | C/T | 01p | T | 0.0625      | 0.116071429 | 0.039176 |
| rs1170672  | KCNMB3               | C/T | 03q | C | 0.116071429 | 0.0625      | 0.039194 |
| rs2070845  | IFIT2                | A/G | 10q | G | 0.290178571 | 0.205357143 | 0.039216 |
| rs6485702  | LRP4                 | C/T | 11p | T | 0.401785714 | 0.308035714 | 0.039419 |
| rs1673087  | LOC728485            | A/G | 19q | A | 0.232142857 | 0.321428571 | 0.039645 |
| rs859541   |                      | A/G | 08q | A | 0.34375     | 0.4375      | 0.039696 |
| rs1011454  |                      | C/T | 05q | C | 0.285714286 | 0.379464286 | 0.039706 |
| rs4647297  | CASP2                | C/G | 07q | C | 0.080357143 | 0.035714286 | 0.039717 |
| rs7686575  |                      | C/T | 04p | T | 0.058035714 | 0.111607143 | 0.039744 |
| rs10494755 | C1orf218             | C/T | 01q | T | 0.082568807 | 0.153153153 | 0.039777 |
| rs10200024 | LOC651758, LOC728768 | A/G | 02q | A | 0.428571429 | 0.334821429 | 0.039819 |
| rs4940404  | ALPK2                | A/T | 18q | T | 0.422018349 | 0.481481482 | 0.039875 |
| rs9370418  | GFRAL                | C/T | 06p | T | 0.247747748 | 0.336363636 | 0.03993  |
| rs1248696  | DLG5                 | C/T | 10q | T | 0.071428571 | 0.129464286 | 0.040001 |
| rs10414255 | OR7G3                | C/T | 19p | C | 0.37037037  | 0.279816514 | 0.040013 |
| rs6025606  | CTCFL                | C/T | 20q | T | 0.352678571 | 0.446428571 | 0.040152 |
| rs7133698  | OR6C68               | A/G | 12q | G | 0.4375      | 0.339285714 | 0.040264 |
| rs4420132  |                      | G/T | 01p | T | 0.464285714 | 0.363636364 | 0.040397 |
| rs1052161  | ALMS1                | C/T | 02p | C | 0.428571429 | 0.339285714 | 0.040534 |
| rs4948970  |                      | G/T | 10q | T | 0.294642857 | 0.209821429 | 0.040707 |
| rs2814092  | RCADH5, LOC647346    | C/G | 06q | C | 0.405405405 | 0.315315315 | 0.040795 |
| rs4395187  |                      | C/T | 19p | T | 0.370535714 | 0.28125     | 0.040927 |
| rs1636655  |                      | A/G | 07q | A | 0.328828829 | 0.415178571 | 0.041144 |
| rs309370   | BBS12                | A/G | 04q | A | 0.375       | 0.285714286 | 0.041304 |
| rs227249   |                      | G/T | 06q | T | 0.490909091 | 0.40625     | 0.041341 |



|            |                  |     |     |   |             |             |          |
|------------|------------------|-----|-----|---|-------------|-------------|----------|
| rs12189266 | ODZ2             | C/T | 05q | T | 0.369369369 | 0.459821429 | 0.041406 |
| rs3750826  |                  | C/T | 10q | T | 0.405405405 | 0.5         | 0.041412 |
| rs4280359  | ZNF228           | C/G | 19q | C | 0.460674157 | 0.461538461 | 0.041648 |
| rs185435   | FCHO2            | A/G | 05q | G | 0.125       | 0.196428571 | 0.041707 |
| rs4381244  |                  | C/T | 01p | C | 0.464285714 | 0.366071429 | 0.041875 |
| rs1359590  | FRMPD1           | A/G | 09p | A | 0.241071429 | 0.162162162 | 0.041953 |
| rs2290861  | RSAD1            | A/G | 17q | A | 0.410714286 | 0.321428571 | 0.041972 |
| rs2306283  | SLCO1B1          | C/T | 12p | C | 0.334821429 | 0.433035714 | 0.042038 |
| rs2275140  | LAMC3            | A/G | 09q | A | 0.202702703 | 0.129464286 | 0.042046 |
| rs3797004  |                  | A/G | 04q | A | 0.473214286 | 0.379464286 | 0.042223 |
| rs10425835 | CD177            | A/C | 19q | A | 0.35046729  | 0.452830189 | 0.04223  |
| rs1060463  | CYP4F11          | A/G | 19p | G | 0.45945946  | 0.357142857 | 0.042338 |
| rs2430307  | PMS2L2           | C/T | 07q | T | 0.160714286 | 0.232142857 | 0.042444 |
| rs10121645 |                  | A/G | 09q | A | 0.08490566  | 0.144230769 | 0.042539 |
| rs2306590  | MYOHD1           | A/G | 17q | G | 0.401785714 | 0.490990991 | 0.042747 |
| rs2015877  |                  | G/T | 18q | T | 0.294642857 | 0.214285714 | 0.042983 |
| rs2336081  | KIAA1530         | C/T | 04p | C | 0.34375     | 0.433035714 | 0.043056 |
| rs7689418  | PPID             | G/T | 04q | T | 0.35046729  | 0.26146789  | 0.043616 |
| rs498336   | tcag7.893        | A/C | 07p | A | 0.379464286 | 0.316964286 | 0.043897 |
| rs8112811  | TULP2            | C/T | 19q | T | 0.112612613 | 0.183035714 | 0.044076 |
| rs758738   |                  | A/G | 12p | A | 0.147321429 | 0.223214286 | 0.044204 |
| rs7956679  | ANP32D           | A/C | 12q | C | 0.054054054 | 0.102803738 | 0.044235 |
| rs688534   |                  | A/T | 19p | A | 0.5         | 0.404545454 | 0.044325 |
| rs1498468  | OR51M1           | C/T | 11p | C | 0.126126126 | 0.2         | 0.044438 |
| rs3747243  | FLJ27365         | C/T | 22q | T | 0.254464286 | 0.34375     | 0.044758 |
| rs2232816  | KIAA0859         | A/G | 01q | G | 0.3125      | 0.223214286 | 0.044928 |
| rs4271251  |                  | G/T | 01p | T | 0.160714286 | 0.236607143 | 0.044946 |
| rs649224   | ME2              | C/T | 18q | T | 0.054054054 | 0.102678571 | 0.045126 |
| rs2304075  | LOC153328        | C/T | 05q | T | 0.191964286 | 0.125       | 0.045864 |
| rs744426   | TTN              | C/T | 02q | T | 0.147321429 | 0.084821429 | 0.045924 |
| rs4955417  |                  | C/T | 03p | T | 0.285       | 0.199029126 | 0.045973 |
| rs3809482  | TUBGCP4, ZSCAN29 | A/G | 15q | G | 0.375       | 0.285714286 | 0.046051 |
| rs4964460  | TCP11L2          | A/G | 12q | G | 0.263392857 | 0.1875      | 0.046518 |
| rs4234711  |                  | C/T | 04p | T | 0.446428571 | 0.45945946  | 0.046652 |
| rs269868   | DUOX2            | C/T | 15q | C | 0.125       | 0.066964286 | 0.04671  |
| rs2274068  | GARNL1           | A/G | 14q | G | 0.151785714 | 0.225225225 | 0.04677  |
| rs34813    | GIN1             | A/G | 05q | A | 0.28125     | 0.370535714 | 0.046872 |

|            |           |     |     |   |             |             |          |
|------------|-----------|-----|-----|---|-------------|-------------|----------|
| rs10917403 |           | A/C | 01p | C | 0.306306306 | 0.223214286 | 0.047044 |
| rs12753    | ZNF230    | A/C | 19q | A | 0.207207207 | 0.133928571 | 0.0473   |
| rs564117   | TMEM162   | C/T | 19q | T | 0.276785714 | 0.196428571 | 0.047389 |
| rs10797774 | C1orf120  | A/G | 01q | A | 0.169642857 | 0.245454545 | 0.047533 |
| rs6478957  |           | A/G | 09q | G | 0.486486486 | 0.419642857 | 0.047669 |
| rs11976480 | AOAH      | C/T | 07p | T | 0.354545455 | 0.263636364 | 0.047781 |
| rs1045910  | CCDC104   | A/G | 02p | A | 0.107142857 | 0.053571429 | 0.047789 |
| rs3746429  | EDEM2     | A/G | 20q | A | 0.130630631 | 0.201834862 | 0.048172 |
| rs7312017  |           | C/G | 12q | G | 0.392857143 | 0.482142857 | 0.048241 |
| rs7534444  | SEC22B    | G/T | 01q | T | 0.080357143 | 0.136363636 | 0.048361 |
| rs2797501  | C10orf18  | A/G | 10p | G | 0.130630631 | 0.200892857 | 0.04846  |
| rs6965883  | ZNF680    | A/G | 07q | G | 0.214285714 | 0.297297297 | 0.048462 |
| rs774027   | TIMELESS  | A/T | 12q | A | 0.495535714 | 0.402777778 | 0.048929 |
| rs10414398 | CEACAM20  | A/G | 19q | A | 0.133928571 | 0.075892857 | 0.049006 |
| rs2073601  | SIM2      | A/C | 21q | A | 0.299107143 | 0.391891892 | 0.049437 |
| rs3750478  | IFNA21    | C/T | 09p | C | 0.06122449  | 0.020618557 | 0.049539 |
| rs1800354  | SGCG      | A/G | 13q | A | 0.085714286 | 0.147058823 | 0.04956  |
| rs886423   |           | C/G | 06p | G | 0.107142857 | 0.169642857 | 0.049715 |
| rs6910541  | ZNF292    | A/G | 06q | A | 0.075892857 | 0.129464286 | 0.049977 |
| rs1866389  | THBS4     | C/G | 05q | G | 0.200892857 | 0.28125     | 0.050018 |
| rs4148301  | UGT2A1    | A/G | 04q | A | 0.174107143 | 0.107142857 | 0.05008  |
| rs3798748  |           | A/G | 06p | A | 0.340909091 | 0.433035714 | 0.050095 |
| rs10845280 | TAS2R49   | A/G | 12p | G | 0.3125      | 0.401785714 | 0.050141 |
| rs1035543  | PKD1L3    | C/G | 16q | G | 0.258928571 | 0.342342342 | 0.050691 |
| rs4460173  |           | A/G | 05p | G | 0.121621622 | 0.184684685 | 0.051286 |
| rs1836672  | PDE11A    | C/T | 02q | C | 0.254464286 | 0.339285714 | 0.051461 |
| rs3740423  | MKI67     | A/T | 10q | A | 0.165178571 | 0.245535714 | 0.051487 |
| rs3822471  | NIPBL     | A/G | 05p | G | 0.174107143 | 0.110091743 | 0.051563 |
| rs1043836  | HDHD3     | C/T | 09q | C | 0.28125     | 0.361607143 | 0.051758 |
| rs10511670 | FAM29A    | C/G | 09p | C | 0.112612613 | 0.0625      | 0.051856 |
| rs7299135  | LOC728114 | C/T | 12q | T | 0.410714286 | 0.324324324 | 0.051874 |
| rs12657663 | CAMLG     | A/G | 05q | A | 0.127272727 | 0.071428571 | 0.051922 |
| rs1154510  | HPD       | A/G | 12q | A | 0.121621622 | 0.067567568 | 0.051936 |
| rs4871827  | DEPDC6    | A/G | 08q | A | 0.290178571 | 0.373873874 | 0.052122 |
| rs2602141  | TP53BP1   | G/T | 15q | G | 0.375       | 0.288288288 | 0.052232 |
| rs2277998  | CLEC4M    | A/G | 19p | A | 0.316964286 | 0.238738739 | 0.052361 |
| rs4747647  | TAF3      | A/G | 10p | A | 0.486607143 | 0.397321429 | 0.052492 |

|            |                |     |     |   |             |             |          |
|------------|----------------|-----|-----|---|-------------|-------------|----------|
| rs3737515  | SPTA1          | C/G | 01q | C | 0.240384615 | 0.328703704 | 0.052616 |
| rs3205537  | PDZRN3         | C/T | 03p | T | 0.365384615 | 0.274725275 | 0.053432 |
| rs470101   | TTC28          | C/T | 22q | C | 0.066964286 | 0.120535714 | 0.053448 |
| rs4880433  | C10orf92       | C/T | 10q | T | 0.423423423 | 0.331818182 | 0.053481 |
| rs2178403  | EIF4G1         | C/T | 03q | T | 0.202702703 | 0.272321429 | 0.053497 |
| rs1962893  |                | A/G | 03p | G | 0.133928571 | 0.196428571 | 0.053601 |
| rs1052420  | ANKRD16        | A/G | 10p | A | 0.165178571 | 0.099099099 | 0.053676 |
| rs7481951  | TMEM16E        | A/T | 11p | A | 0.361607143 | 0.455357143 | 0.053678 |
| rs1411272  | OR1N2          | C/T | 09q | T | 0.410714286 | 0.495535714 | 0.053702 |
| rs1047642  | C4orf27        | A/G | 04q | G | 0.236607143 | 0.162162162 | 0.053773 |
| rs747391   |                | A/G | 04p | G | 0.080357143 | 0.133928571 | 0.053992 |
| rs3749894  | TSPYL1         | C/T | 06q | T | 0.084821429 | 0.142857143 | 0.054199 |
| rs2183302  |                | A/G | 01p | G | 0.168181818 | 0.103773585 | 0.054447 |
| rs4237826  |                | C/T | 12q | T | 0.168181818 | 0.103603604 | 0.054574 |
| rs1968956  | ELTD1          | G/T | 01p | T | 0.072072072 | 0.031818182 | 0.054574 |
| rs2232108  | URG4           | A/C | 07p | A | 0.495454546 | 0.410714286 | 0.054669 |
| rs10485172 | C6orf146       | A/G | 06p | G | 0.106060606 | 0.173076923 | 0.054772 |
| rs10920362 | LGR6           | C/T | 01q | C | 0.417431193 | 0.495412844 | 0.054808 |
| rs1277207  | CLCC1, C1orf62 | C/T | 01p | C | 0.224770642 | 0.153153153 | 0.054941 |
| rs156265   | ACAA1          | C/G | 03p | G | 0.116071429 | 0.18018018  | 0.055113 |
| rs3732383  | XIRP1          | C/T | 03p | T | 0.196428571 | 0.267857143 | 0.055202 |
| rs1995157  | OR52H1         | G/T | 11p | G | 0.357798165 | 0.440909091 | 0.055264 |
| rs9287519  |                | A/G | 02q | A | 0.151785714 | 0.223214286 | 0.055501 |
| rs1894706  | HPS4           | A/G | 22q | G | 0.066964286 | 0.120535714 | 0.055938 |
| rs7157021  | SLC7A8         | A/G | 14q | G | 0.446601942 | 0.454081633 | 0.055954 |
| rs576619   | FLJ20035       | A/G | 04q | G | 0.053571429 | 0.102678571 | 0.056264 |
| rs1800973  | LYZ            | A/C | 12q | A | 0.053571429 | 0.102678571 | 0.056322 |
| rs1042780  | ME3            | C/G | 11q | C | 0.397321429 | 0.315315315 | 0.056335 |
| rs2288033  | LOC729251      | A/G | 16q | A | 0.359223301 | 0.439814815 | 0.056546 |
| rs754615   | CAST           | C/G | 05q | C | 0.409090909 | 0.3125      | 0.056637 |
| rs1058793  | ATP10D         | A/G | 04p | A | 0.151785714 | 0.21875     | 0.056776 |
| rs7944575  |                | A/G | 11q | A | 0.184684685 | 0.265765766 | 0.056843 |
| rs4367963  | OR5I1          | A/G | 11q | G | 0.0625      | 0.113636364 | 0.05686  |
| rs2043211  | CARD8          | A/T | 19q | T | 0.308035714 | 0.232142857 | 0.056885 |
| rs2218598  | OR9Q1          | A/C | 11q | C | 0.339285714 | 0.259090909 | 0.05693  |
| rs432839   | ZNF66          | G/T | 19p | T | 0.13963964  | 0.081081081 | 0.056959 |
| rs741326   | CD207          | C/T | 02p | C | 0.446428571 | 0.357142857 | 0.057091 |

|            |           |     |     |   |             |             |          |
|------------|-----------|-----|-----|---|-------------|-------------|----------|
| rs11239984 |           | A/G | 01q | A | 0.363636364 | 0.279279279 | 0.057318 |
| rs2918517  |           | A/C | 03p | A | 0.290178571 | 0.227678571 | 0.05732  |
| rs11880363 |           | G/T | 19q | T | 0.254464286 | 0.339285714 | 0.057578 |
| rs10507047 | FGD6      | C/T | 12q | C | 0.081081081 | 0.135135135 | 0.05764  |
| rs10772420 | TAS2R48   | A/G | 12p | A | 0.435185185 | 0.476635514 | 0.057699 |
| rs9925027  |           | A/G | 16q | A | 0.335106383 | 0.430107527 | 0.057804 |
| rs3730150  |           | A/C | 02q | A | 0.169642857 | 0.240740741 | 0.058173 |
| rs2017116  | ALMS1     | C/G | 02p | G | 0.171171171 | 0.108108108 | 0.058503 |
| rs3733182  | STK32B    | C/T | 04p | C | 0.084821429 | 0.138392857 | 0.058567 |
| rs3814799  | LOC650794 | C/G | 13q | C | 0.157657658 | 0.21875     | 0.058901 |
| rs3777084  | CCDC99    | C/T | 05q | T | 0.283783784 | 0.366071429 | 0.058971 |
| rs3180227  | SERPINB3  | C/G | 18q | C | 0.138392857 | 0.205357143 | 0.059    |
| rs11155242 | GPR126    | A/C | 06q | C | 0.236607143 | 0.165178571 | 0.059183 |
| rs1160185  | SAR1P3    | A/G | 04q | G | 0.254545455 | 0.330357143 | 0.059353 |
| rs3027961  | SLC1A5    | C/G | 19q | C | 0.186363636 | 0.263392857 | 0.059357 |
| rs2108622  | CYP4F2    | C/T | 19p | T | 0.334821429 | 0.252252252 | 0.059401 |
| rs3809429  | C14orf155 | A/C | 14q | A | 0.14953271  | 0.090909091 | 0.059822 |
| rs7255896  | RNF126    | A/C | 19p | C | 0.195454546 | 0.272321429 | 0.05985  |
| rs1801197  | CALCR     | C/T | 07q | C | 0.21875     | 0.299107143 | 0.060183 |
| rs3213422  | DHODH     | A/C | 16q | A | 0.477272727 | 0.432432432 | 0.06041  |
| rs1528     | SERGEF    | C/T | 11p | C | 0.085585586 | 0.145454545 | 0.060435 |
| rs10883563 | C10orf6   | A/C | 10q | C | 0.445945946 | 0.357142857 | 0.060777 |
| rs7256321  | ZNF443    | G/T | 19p | T | 0.190476191 | 0.266990291 | 0.060903 |
| rs2074464  | OR10C1    | C/T | 06p | T | 0.464285714 | 0.383928571 | 0.060906 |
| rs1200345  | RPAP1     | C/T | 15q | C | 0.401785714 | 0.491071429 | 0.061205 |
| rs7133914  | LRRK2     | A/G | 12q | A | 0.084821429 | 0.040178571 | 0.061421 |
| rs573556   |           | G/T | 17q | T | 0.116161616 | 0.186170213 | 0.061751 |
| rs20559    | LAMC1     | A/G | 01q | A | 0.071428571 | 0.031531531 | 0.061752 |
| rs3809982  | ALPK2     | C/T | 18q | T | 0.459821429 | 0.450892857 | 0.062149 |
| rs4735133  | PKHD1L1   | A/G | 08q | G | 0.462765957 | 0.441176471 | 0.062261 |
| rs6884959  |           | A/G | 05q | G | 0.459821429 | 0.377272727 | 0.062406 |
| rs3177979  | OAS1      | A/G | 12q | G | 0.397321429 | 0.3125      | 0.06244  |
| rs231677   | OR3A4     | A/G | 17p | A | 0.054054054 | 0.099099099 | 0.062818 |
| rs4818425  |           | C/T | 21q | T | 0.440909091 | 0.473214286 | 0.063084 |
| rs1051042  | OAS1      | C/G | 12q | G | 0.396396396 | 0.310810811 | 0.063208 |
| rs3778005  | IMPG1     | A/G | 06q | A | 0.232142857 | 0.307339449 | 0.063451 |
| rs989902   | PTPN13    | A/C | 04q | C | 0.446428571 | 0.364864865 | 0.063518 |

|            |                   |     |     |   |             |             |          |
|------------|-------------------|-----|-----|---|-------------|-------------|----------|
| rs3809983  | ALPK2             | G/T | 18q | T | 0.459459459 | 0.450892857 | 0.063583 |
| rs3797713  | CCDC99            | C/T | 05q | T | 0.285714286 | 0.366071429 | 0.063599 |
| rs897507   |                   | C/T | 02p | T | 0.464285714 | 0.450892857 | 0.063891 |
| rs10788116 |                   | C/T | 10q | T | 0.299107143 | 0.378378378 | 0.063969 |
| rs412978   | LOC341346         | A/G | 12p | A | 0.058035714 | 0.108108108 | 0.064251 |
| rs10330845 |                   | A/G | 07p | A | 0.063063063 | 0.113636364 | 0.064407 |
| rs1046668  | TNFAIP6           | A/G | 02q | G | 0.133928571 | 0.196428571 | 0.064485 |
| rs3742801  | ABCD4             | A/G | 14q | A | 0.348214286 | 0.433035714 | 0.064516 |
| rs4801296  | hCG_2042202       | C/T | 19q | T | 0.436363636 | 0.351351351 | 0.06503  |
| rs885117   |                   | A/G | 11p | G | 0.178571429 | 0.25        | 0.065263 |
| rs9788014  |                   | C/T | 12q | T | 0.077272727 | 0.131818182 | 0.065552 |
| rs7570797  | PROKR1            | A/G | 02p | G | 0.0625      | 0.027027027 | 0.065951 |
| rs3213837  | ERBB2IP           | A/G | 05q | A | 0.125       | 0.189189189 | 0.066229 |
| rs285584   | PDZRN4            | A/G | 12q | A | 0.191964286 | 0.125       | 0.066667 |
| rs2273367  | KIAA1799          | C/T | 01p | T | 0.129032258 | 0.201149425 | 0.066994 |
| rs9974272  |                   | A/G | 21q | G | 0.169642857 | 0.241071429 | 0.06702  |
| rs10791961 | OR8U8             | C/G | 11q | G | 0.337837838 | 0.433035714 | 0.067331 |
| rs10225416 |                   | G/T | 07q | T | 0.334821429 | 0.415178571 | 0.067501 |
| rs1646119  | LOC728804         | C/T | 16p | C | 0.482142857 | 0.433035714 | 0.067655 |
| rs228104   | SLC37A1           | C/T | 21q | C | 0.074074074 | 0.133928571 | 0.068046 |
| rs11702604 |                   | C/T | 21q | T | 0.165178571 | 0.236607143 | 0.06841  |
| rs7916821  | MYPN              | A/G | 10q | G | 0.46875     | 0.446428571 | 0.068439 |
| rs4981844  |                   | G/T | 14q | T | 0.477272727 | 0.432432432 | 0.068655 |
| rs2276415  | AQP11             | A/G | 11q | A | 0.058558559 | 0.104545454 | 0.068954 |
| rs138646   | TTC28             | A/C | 22q | A | 0.066964286 | 0.117117117 | 0.069139 |
| rs12434822 |                   | G/T | 14q | G | 0.400943396 | 0.495495495 | 0.06935  |
| rs3752109  | MZF1              | A/G | 19q | A | 0.3125      | 0.234234234 | 0.069389 |
| rs2186564  | C11orf67          | C/T | 11q | T | 0.054054054 | 0.098214286 | 0.069497 |
| rs7915     | PPP1R14D, ZFYVE19 | A/C | 15q | C | 0.366071429 | 0.446428571 | 0.069672 |
| rs2741098  | XKR5              | C/T | 08p | T | 0.486486487 | 0.401785714 | 0.069691 |
| rs1050081  |                   | C/G | 11q | G | 0.21875     | 0.151785714 | 0.07001  |
| rs3808869  | ARID3C            | G/T | 09p | T | 0.468468468 | 0.446428571 | 0.070093 |
| rs4695533  |                   | A/T | 04p | A | 0.213636364 | 0.28440367  | 0.070184 |
| rs3180370  | ESF1              | C/T | 20p | T | 0.294642857 | 0.378378378 | 0.070194 |
| rs6734610  | PAX8              | A/G | 02q | A | 0.441964286 | 0.472972973 | 0.07035  |
| rs11858624 | PYGO1             | G/T | 15q | T | 0.09375     | 0.049107143 | 0.070761 |
| rs10788726 |                   | A/T | 01q | T | 0.164948454 | 0.236842105 | 0.070995 |

|            |              |     |     |   |             |             |          |
|------------|--------------|-----|-----|---|-------------|-------------|----------|
| rs2775779  |              | C/T | 21q | T | 0.334821429 | 0.415178571 | 0.071259 |
| rs7308811  | A2ML1        | A/G | 12p | A | 0.200892857 | 0.135135135 | 0.0714   |
| rs1894704  | HPS4         | A/C | 22q | C | 0.066964286 | 0.117117117 | 0.071659 |
| rs937838   | TGM4         | C/G | 03p | C | 0.117117117 | 0.066964286 | 0.072386 |
| rs2288569  | TTN          | A/G | 02q | A | 0.148648649 | 0.090909091 | 0.072408 |
| rs4940595  | SERPINB11    | G/T | 18q | G | 0.25        | 0.330275229 | 0.072457 |
| rs939875   | KIAA0984     | A/G | 12q | A | 0.066964286 | 0.027027027 | 0.072723 |
| rs11556045 | HEXB         | A/G | 05q | G | 0.198198198 | 0.133928571 | 0.072816 |
| rs7586970  | TFPI         | C/T | 02q | C | 0.397321429 | 0.31981982  | 0.072971 |
| rs7694744  |              | G/T | 04q | T | 0.379464286 | 0.301801802 | 0.07306  |
| rs10941412 | OSMR         | A/G | 05p | A | 0.205357143 | 0.142857143 | 0.073085 |
| rs3847531  | FAT3         | A/G | 11q | A | 0.09375     | 0.151785714 | 0.073089 |
| rs7626076  |              | A/G | 03p | G | 0.272321429 | 0.200892857 | 0.073108 |
| rs1147504  | PTPRZ1       | A/G | 07q | G | 0.47706422  | 0.436363636 | 0.073113 |
| rs10739614 | OR1L8        | C/G | 09q | C | 0.361607143 | 0.445454545 | 0.073292 |
| rs3617     | ITIH3        | G/T | 03p | T | 0.495495495 | 0.418918919 | 0.073433 |
| rs30461    | IL29         | C/T | 19q | C | 0.102678571 | 0.160714286 | 0.073651 |
| rs202488   |              | A/G | 20p | A | 0.292792793 | 0.21875     | 0.074036 |
| rs6119     | SERPINA5     | A/G | 14q | G | 0.074766355 | 0.128440367 | 0.07427  |
| rs1048135  | NMI          | C/T | 02q | T | 0.383928571 | 0.468181818 | 0.07435  |
| rs3814165  | C10orf38     | C/T | 10p | T | 0.214285714 | 0.148648649 | 0.074526 |
| rs9323183  | CDKL1        | C/G | 14q | C | 0.053571429 | 0.102678571 | 0.074694 |
| rs1622208  | MAST2        | C/T | 01p | T | 0.316964286 | 0.241071429 | 0.074762 |
| rs11647    | LOC339804    | C/G | 02p | C | 0.174107143 | 0.113636364 | 0.074798 |
| rs2478568  | SLC39A12     | A/G | 10p | G | 0.424107143 | 0.34375     | 0.075029 |
| rs6688832  | H6PD         | A/G | 01p | A | 0.200892857 | 0.276785714 | 0.075309 |
| rs3803230  | COL4A2       | C/G | 13q | G | 0.084821429 | 0.13963964  | 0.075397 |
| rs3745833  | GALP         | C/G | 19q | C | 0.334821429 | 0.40990991  | 0.075494 |
| rs1001238  | TTN          | A/G | 02q | G | 0.241071429 | 0.174107143 | 0.075508 |
| rs838543   | USP40        | C/T | 02q | C | 0.263392857 | 0.190909091 | 0.075535 |
| rs3779620  | PBK          | A/G | 08p | G | 0.138392857 | 0.085585586 | 0.075569 |
| rs1366257  | ZNF534       | A/G | 19q | G | 0.067567568 | 0.03125     | 0.075604 |
| rs921135   | OR6Q1, OR9Q1 | A/G | 11q | G | 0.342342342 | 0.268181818 | 0.075661 |
| rs322117   | FLJ35880     | A/G | 03q | G | 0.169642857 | 0.236607143 | 0.075752 |
| rs1673607  | CEP70        | A/G | 03q | G | 0.369369369 | 0.446428571 | 0.07585  |
| rs2133173  | TCTEX1D1     | G/T | 01p | T | 0.245535714 | 0.321100917 | 0.075887 |
| rs5988     | F13A1        | C/G | 06p | C | 0.241071429 | 0.169642857 | 0.076029 |

|            |              |     |     |   |             |             |          |
|------------|--------------|-----|-----|---|-------------|-------------|----------|
| rs1061305  | NEB          | A/G | 02q | G | 0.355140187 | 0.439814815 | 0.076115 |
| rs1807757  |              | C/T | 12q | T | 0.35        | 0.429906542 | 0.07648  |
| rs6667720  | C1orf167     | C/T | 01p | C | 0.263392857 | 0.34375     | 0.076531 |
| rs4013197  |              | A/G | 09p | A | 0.254464286 | 0.1875      | 0.076685 |
| rs4808739  |              | C/T | 19p | C | 0.214285714 | 0.288288288 | 0.07684  |
| rs2074877  | MYH13        | C/T | 17p | T | 0.351351351 | 0.433035714 | 0.077076 |
| rs11177059 |              | C/T | 12q | T | 0.355855856 | 0.4375      | 0.077161 |
| rs11780509 |              | C/T | 08q | C | 0.254464286 | 0.183035714 | 0.077239 |
| rs1416840  | C1orf102     | A/G | 01p | G | 0.071428571 | 0.122727273 | 0.077348 |
| rs7131975  |              | C/T | 12q | T | 0.482142857 | 0.405405405 | 0.077506 |
| rs10783071 | BRDT         | A/C | 01p | C | 0.08411215  | 0.040540541 | 0.077683 |
| rs3732379  | CX3CR1       | C/T | 03p | T | 0.220720721 | 0.294642857 | 0.077754 |
| rs4732748  | ESCO2        | C/T | 08p | T | 0.138392857 | 0.085585586 | 0.077938 |
| rs9562362  | RP11-125A7.3 | C/T | 13q | T | 0.339285714 | 0.263392857 | 0.077954 |
| rs3745945  | SIPA1L3      | C/G | 19q | G | 0.080357143 | 0.136363636 | 0.078001 |
| rs362124   | SUHW1        | C/G | 22q | C | 0.325892857 | 0.25        | 0.078007 |
| rs6427437  |              | A/T | 01q | A | 0.370535714 | 0.450892857 | 0.078033 |
| rs12450550 | EME1         | C/T | 17q | C | 0.3125      | 0.236607143 | 0.078051 |
| rs17567    | EPS15        | C/T | 01p | C | 0.183035714 | 0.25        | 0.078109 |
| rs466876   | EMR1         | A/G | 19p | A | 0.196428571 | 0.267857143 | 0.078302 |
| rs12251325 |              | A/G | 10q | G | 0.25        | 0.183035714 | 0.078505 |
| rs1463669  |              | A/G | 12q | G | 0.084821429 | 0.138392857 | 0.078984 |
| rs4785963  | DNAJA3       | A/T | 16p | A | 0.308035714 | 0.22972973  | 0.079374 |
| rs7216445  | DDX52        | C/T | 17q | T | 0.142857143 | 0.205357143 | 0.079425 |
| rs4871857  | TNFRSF10A    | C/G | 08p | C | 0.427927928 | 0.486486486 | 0.079883 |
| rs2275592  | ATP5S        | C/T | 14q | C | 0.352678571 | 0.433035714 | 0.07999  |
| rs373610   | OBSCN        | A/G | 01q | A | 0.279279279 | 0.357142857 | 0.080221 |
| rs1953558  |              | C/T | 14q | C | 0.477678571 | 0.4375      | 0.080484 |
| rs1020694  | SERPINB13    | C/T | 18q | C | 0.200892857 | 0.267857143 | 0.08095  |
| rs7295489  |              | C/G | 12q | C | 0.080357143 | 0.040178571 | 0.080977 |
| rs7073610  | CWF19L1      | A/G | 10q | A | 0.0625      | 0.026785714 | 0.081007 |
| rs857824   | OR6N1        | C/T | 01q | C | 0.257009346 | 0.339805825 | 0.081312 |
| rs1506419  | SERPINB11    | A/T | 18q | A | 0.241071429 | 0.316964286 | 0.081493 |
| rs2306773  |              | A/T | 03q | A | 0.473214286 | 0.388392857 | 0.081517 |
| rs7588093  |              | A/C | 02q | A | 0.267857143 | 0.346846847 | 0.08155  |
| rs926487   | ZNF337       | A/G | 20p | A | 0.075892857 | 0.036363636 | 0.081643 |
| rs3749195  | TGM4         | A/G | 03p | G | 0.428571429 | 0.491071429 | 0.081814 |

|            |                     |     |     |   |             |             |          |
|------------|---------------------|-----|-----|---|-------------|-------------|----------|
| rs3813803  | SMPDL3B             | A/G | 01p | G | 0.330275229 | 0.256756757 | 0.081831 |
| rs5752330  | HPS4                | C/T | 22q | C | 0.108108108 | 0.165178571 | 0.081881 |
| rs2601530  | LOC646096           | A/T | 15q | A | 0.148648649 | 0.098214286 | 0.082468 |
| rs436696   | FLJ37543            | A/G | 05q | A | 0.400900901 | 0.31981982  | 0.082618 |
| rs3809976  | ALPK2               | G/T | 18q | T | 0.196428571 | 0.263392857 | 0.082623 |
| rs11084227 |                     | A/G | 19q | G | 0.424107143 | 0.34375     | 0.082788 |
| rs997983   | MKI67               | A/C | 10q | C | 0.111111111 | 0.065420561 | 0.082881 |
| rs7518979  | FLJ32569, LOC651713 | A/G | 01q | G | 0.193693694 | 0.129464286 | 0.082882 |
| rs3764626  | ZNF333              | C/T | 19p | T | 0.25        | 0.330097087 | 0.082978 |
| rs3742424  | PPP2R5C             | C/G | 14q | C | 0.076576577 | 0.127272727 | 0.083049 |
| rs6596270  | LOC153328           | A/G | 05q | G | 0.193693694 | 0.267857143 | 0.083068 |
| rs2469791  | OR1A2               | C/T | 17p | T | 0.272321429 | 0.204545455 | 0.083079 |
| rs4760349  |                     | G/T | 12q | G | 0.297297297 | 0.373873874 | 0.0831   |
| rs6926980  | ZNF451, KIAA1586    | A/G | 06p | A | 0.147321429 | 0.213636364 | 0.083138 |
| rs7249230  | CEACAM5             | A/G | 19q | A | 0.21875     | 0.151785714 | 0.083201 |
| rs3731620  | C2orf44             | C/T | 02p | T | 0.116071429 | 0.171171171 | 0.083289 |
| rs774047   | TIMELESS            | C/T | 12q | T | 0.495495496 | 0.413636364 | 0.083475 |
| rs4722266  | STK31               | A/G | 07p | A | 0.081081081 | 0.129464286 | 0.083884 |
| rs220461   | ITGAE, GSG2         | A/G | 17p | G | 0.353211009 | 0.277272727 | 0.084019 |
| rs293833   |                     | C/T | 03q | T | 0.214285714 | 0.283783784 | 0.084084 |
| rs2305397  | CAND2               | A/G | 03p | A | 0.445945946 | 0.473214286 | 0.084323 |
| rs785467   | PIK3R3              | A/T | 01p | T | 0.316964286 | 0.243243243 | 0.084397 |
| rs1940475  | MMP8                | C/T | 11q | T | 0.433035714 | 0.486607143 | 0.084579 |
| rs2844884  |                     | C/T | 22q | T | 0.106382979 | 0.057471264 | 0.084794 |
| rs3748415  | APCDD1              | C/T | 18p | T | 0.118181818 | 0.068807339 | 0.084816 |
| rs2395617  | DEF6                | A/C | 06p | A | 0.174757282 | 0.119266055 | 0.08493  |
| rs157896   |                     | C/T | 07q | T | 0.09375     | 0.147321429 | 0.085074 |
| rs4658146  | GBP6                | A/G | 01p | A | 0.260638298 | 0.352631579 | 0.085187 |
| rs877346   | KRTAP13-2           | A/T | 21q | T | 0.436936937 | 0.477678571 | 0.085413 |
| rs2275069  | ITIH5               | G/T | 10p | T | 0.482142857 | 0.436936937 | 0.085496 |
| rs11208299 | C1orf176            | G/T | 01p | T | 0.295454546 | 0.37962963  | 0.085622 |
| rs5716     | ACSM3, EXOD1        | C/G | 16p | C | 0.075892857 | 0.125       | 0.085668 |
| rs4697879  | LOC643446           | A/G | 04p | A | 0.053571429 | 0.022321429 | 0.0859   |
| rs1807300  |                     | G/T | 03q | G | 0.258928571 | 0.190909091 | 0.086139 |
| rs9546785  | LOC728591           | C/T | 13q | C | 0.46875     | 0.450892857 | 0.086161 |
| rs2291533  | C3orf49             | C/G | 03p | G | 0.223214286 | 0.160714286 | 0.086195 |
| rs854524   | PPP1R9A             | A/G | 07q | A | 0.428571429 | 0.486607143 | 0.086274 |



|            |              |     |     |   |             |             |          |
|------------|--------------|-----|-----|---|-------------|-------------|----------|
| rs6906499  | NUP153       | C/G | 06p | C | 0.205357143 | 0.272321429 | 0.086326 |
| rs638043   | KRT2         | C/T | 12q | T | 0.151785714 | 0.216216216 | 0.086341 |
| rs911973   | MYO16        | A/T | 13q | T | 0.050561798 | 0.097701149 | 0.08636  |
| rs1841958  | KLRC4        | A/C | 12p | A | 0.272321429 | 0.348214286 | 0.086374 |
| rs15396    | C1orf88      | A/C | 01p | C | 0.058035714 | 0.104545455 | 0.086638 |
| rs2063690  | TIPIN        | C/G | 15q | G | 0.09375     | 0.04954955  | 0.086796 |
| rs705667   |              | A/G | 09q | G | 0.127272727 | 0.186363636 | 0.087047 |
| rs1048603  | USP40        | C/T | 02q | T | 0.379464286 | 0.299107143 | 0.087309 |
| rs2071921  | SAC          | C/T | 01q | C | 0.339285714 | 0.419642857 | 0.087337 |
| rs7941731  | OR52R1       | A/G | 11p | G | 0.324324324 | 0.405405405 | 0.087402 |
| rs749902   | TRIM45       | A/G | 01p | A | 0.373873874 | 0.297297297 | 0.087745 |
| rs3130100  | ZBTB22       | C/T | 06p | T | 0.482142857 | 0.441964286 | 0.087759 |
| rs11902811 | C2orf13      | A/G | 02p | G | 0.058558559 | 0.026785714 | 0.087985 |
| rs4905081  | KIAA1409     | A/G | 14q | A | 0.440909091 | 0.482142857 | 0.088027 |
| rs2053116  | OR52R1       | G/T | 11p | G | 0.321428571 | 0.401785714 | 0.088407 |
| rs1976809  | LOC645521    | A/G | 02p | G | 0.397321429 | 0.321428571 | 0.088651 |
| rs442800   | DZIP1L       | C/T | 03q | T | 0.316964286 | 0.241071429 | 0.088704 |
| rs1053230  | KMO, OPN3    | A/G | 01q | A | 0.28125     | 0.214285714 | 0.088964 |
| rs8473     | MKI67        | A/G | 10q | A | 0.477678571 | 0.397321429 | 0.089056 |
| rs8065080  | TRPV1        | C/T | 17p | C | 0.375       | 0.450892857 | 0.089198 |
| rs1865118  |              | G/T | 19p | T | 0.155660377 | 0.210280374 | 0.089327 |
| rs7513079  | AADA3L3      | G/T | 01p | G | 0.34375     | 0.267857143 | 0.08934  |
| rs1506418  | SERPINB11    | A/G | 18q | A | 0.241071429 | 0.315315315 | 0.089625 |
| rs831510   | FGD2         | C/G | 06p | C | 0.166666667 | 0.232142857 | 0.089828 |
| rs2303579  | NEDD4        | C/T | 15q | T | 0.257425743 | 0.186915888 | 0.089928 |
| rs12477430 | ZNF804A      | A/G | 02q | A | 0.357142857 | 0.28125     | 0.08996  |
| rs722896   | CLEC4F       | A/G | 02p | A | 0.34375     | 0.27027027  | 0.090017 |
| rs4757816  |              | A/C | 11p | A | 0.40625     | 0.330357143 | 0.090092 |
| rs11860295 | PLEKHG4      | C/T | 16q | T | 0.071428571 | 0.117117117 | 0.090233 |
| rs1065206  | HSPC111      | A/G | 05q | A | 0.151785714 | 0.101851852 | 0.090409 |
| rs2072993  | PTCHD2       | C/G | 01p | G | 0.165178571 | 0.111607143 | 0.090472 |
| rs4072030  |              | C/G | 17q | G | 0.491071429 | 0.432432432 | 0.090611 |
| rs10845281 | TAS2R49      | C/T | 12p | C | 0.324324324 | 0.401785714 | 0.091056 |
| rs10743597 |              | A/G | 12p | G | 0.330357143 | 0.252252252 | 0.09107  |
| rs2513726  | OR6Q1, OR9Q1 | A/G | 11q | G | 0.339285714 | 0.267857143 | 0.091329 |
| rs10047085 | SERINC2      | A/G | 01p | G | 0.40625     | 0.325892857 | 0.091506 |
| rs11711871 | XIRP1        | G/T | 03p | G | 0.198198198 | 0.258928571 | 0.091562 |

|            |                     |     |     |   |             |             |          |
|------------|---------------------|-----|-----|---|-------------|-------------|----------|
| rs4392054  |                     | C/T | 16p | T | 0.076576577 | 0.125       | 0.091648 |
| rs2273668  | SESN1               | G/T | 06q | T | 0.129464286 | 0.080357143 | 0.09175  |
| rs11090046 |                     | C/T | 22q | C | 0.15625     | 0.098214286 | 0.091834 |
| rs2189879  |                     | A/G | 07q | G | 0.294642857 | 0.370535714 | 0.091849 |
| rs3758911  | CWF19L2             | A/G | 11q | G | 0.414414414 | 0.337837838 | 0.091907 |
| rs12142199 | CPSF3L              | A/G | 01p | G | 0.254464286 | 0.183035714 | 0.091922 |
| rs2289965  | IGSF22              | C/T | 11p | C | 0.414414414 | 0.334821429 | 0.092163 |
| rs10419548 | LOC649137           | A/G | 19q | G | 0.375       | 0.299107143 | 0.092593 |
| rs2073145  | ZBP1                | A/G | 20q | G | 0.337837838 | 0.265765766 | 0.09317  |
| rs6511874  | OR7G1               | A/G | 19p | G | 0.205357143 | 0.147321429 | 0.093381 |
| rs2287987  | ARTS-1              | C/T | 05q | C | 0.243119266 | 0.174528302 | 0.093473 |
| rs11671053 | ZNF675              | A/G | 19p | A | 0.389908257 | 0.313636364 | 0.093508 |
| rs9866806  | KIAA2018            | C/G | 03q | C | 0.267857143 | 0.342342342 | 0.093744 |
| rs4761944  |                     | A/G | 12q | G | 0.433035714 | 0.355855856 | 0.093862 |
| rs10979727 | EPB41L4B            | C/T | 09q | T | 0.375       | 0.450892857 | 0.093899 |
| rs10963    | CLSTN3, RBP5        | C/T | 12p | T | 0.107142857 | 0.063063063 | 0.09395  |
| rs11183014 | TMEM16F             | A/C | 12q | A | 0.053571429 | 0.022522522 | 0.094087 |
| rs9348266  | FAM120B             | G/T | 06q | G | 0.109090909 | 0.165178571 | 0.094493 |
| rs6511     | SPAG1               | C/T | 08q | T | 0.3125      | 0.392857143 | 0.094677 |
| rs4667393  | FLJ32955            | A/C | 02q | A | 0.169642857 | 0.236607143 | 0.094728 |
| rs3793771  | WNT8B               | C/G | 10q | G | 0.208333333 | 0.279411765 | 0.094728 |
| rs2123465  | RIF1                | C/T | 02q | C | 0.388392857 | 0.313636364 | 0.094962 |
| rs9608378  | CRYBB3              | C/G | 22q | C | 0.428571429 | 0.348214286 | 0.095083 |
| rs2421013  | BTBD16              | A/G | 10q | A | 0.455357143 | 0.464285714 | 0.095274 |
| rs914358   | AKAP2, PALM2-AKAP2  | A/G | 09q | A | 0.425233645 | 0.490740741 | 0.095276 |
| rs1890908  | SYNE2               | A/G | 14q | A | 0.053571429 | 0.09375     | 0.095396 |
| rs2278415  | ZNF350              | A/T | 19q | A | 0.151785714 | 0.214285714 | 0.095591 |
| rs2334321  | C6orf186, LOC731200 | A/G | 06q | A | 0.094594595 | 0.053571429 | 0.0958   |
| rs1566734  | PTPRJ               | G/T | 11p | G | 0.138392857 | 0.196428571 | 0.09631  |
| rs8064529  | TSEN54              | C/T | 17q | C | 0.265765766 | 0.339285714 | 0.096397 |
| rs4582772  | GBP6                | C/T | 01p | T | 0.129464286 | 0.081081081 | 0.096428 |
| rs11934749 | CORIN               | C/T | 04p | T | 0.189189189 | 0.133928571 | 0.096467 |
| rs2270699  | HSPG2               | C/T | 01p | T | 0.255       | 0.197115385 | 0.096682 |
| rs14024    | KRT1                | A/G | 12q | G | 0.321428571 | 0.400900901 | 0.096815 |
| rs2232580  | LBP                 | C/T | 20q | T | 0.068807339 | 0.114285714 | 0.096843 |
| rs3730148  |                     | A/G | 02q | G | 0.174107143 | 0.234234234 | 0.096848 |
| rs4242722  |                     | C/T | 10q | C | 0.058035714 | 0.026785714 | 0.096973 |

|            |              |     |     |   |             |             |          |
|------------|--------------|-----|-----|---|-------------|-------------|----------|
| rs9416746  | BICC1        | G/T | 10q | G | 0.303571429 | 0.232142857 | 0.096988 |
| rs33204    | WDR41        | A/G | 05q | A | 0.395238095 | 0.474747475 | 0.097322 |
| rs9367359  | C6orf140     | A/G | 06p | A | 0.369369369 | 0.294642857 | 0.097379 |
| rs352099   | FLJ34503     | A/G | 06q | A | 0.209821429 | 0.279279279 | 0.097502 |
| rs6504234  | POLG2        | C/T | 17q | C | 0.095454545 | 0.146788991 | 0.09766  |
| rs2044276  |              | A/G | 04q | A | 0.3125      | 0.387387387 | 0.097745 |
| rs1366245  | FLJ16287     | A/G | 19q | A | 0.281818182 | 0.214285714 | 0.097801 |
| rs2189880  |              | C/T | 07q | C | 0.294642857 | 0.369369369 | 0.097807 |
| rs3781408  | CTBP2        | A/G | 10q | A | 0.075892857 | 0.04054054  | 0.097902 |
| rs2275660  | PARP4        | C/T | 13q | C | 0.283018868 | 0.222222222 | 0.098099 |
| rs11809423 | HIVEP3       | C/T | 01p | T | 0.075892857 | 0.040178571 | 0.098367 |
| rs878388   | OBSCN        | A/G | 01q | A | 0.276785714 | 0.348214286 | 0.098717 |
| rs10735005 | CACNA2D4     | C/T | 12p | T | 0.151785714 | 0.099099099 | 0.098802 |
| rs6497671  | EARS2        | C/T | 16p | T | 0.1875      | 0.129464286 | 0.098966 |
| rs422640   | HCG9         | C/G | 06p | G | 0.116071429 | 0.171171171 | 0.099005 |
| rs1503185  | PTPRJ        | C/T | 11p | T | 0.135135135 | 0.192660551 | 0.099009 |
| rs2289043  | UNC5C        | C/T | 04q | T | 0.346846847 | 0.276785714 | 0.099152 |
| rs210280   | ZNF33B       | A/G | 10q | G | 0.111607143 | 0.162162162 | 0.099215 |
| rs420137   | FNDC1        | C/G | 06q | C | 0.067567568 | 0.109090909 | 0.099445 |
| rs733998   |              | C/T | 19q | C | 0.086363636 | 0.138392857 | 0.09952  |
| rs903160   | SMG6         | C/T | 17p | T | 0.361607143 | 0.290178571 | 0.099557 |
| rs3820564  | LGALS8       | A/G | 01q | G | 0.058558559 | 0.026785714 | 0.099677 |
| rs1883847  | DIDO1        | C/T | 20q | T | 0.1875      | 0.256756757 | 0.099688 |
| rs4647958  | SNAI1        | C/T | 20q | C | 0.198198198 | 0.138392857 | 0.099797 |
| rs4235380  |              | A/G | 04p | A | 0.328828829 | 0.256756757 | 0.100037 |
| rs3743242  | DMN          | A/T | 15q | T | 0.118181818 | 0.075892857 | 0.100087 |
| rs1834026  | OR1F1        | A/G | 16p | G | 0.463636364 | 0.386363636 | 0.100092 |
| rs6891545  |              | A/C | 05q | A | 0.254464286 | 0.191964286 | 0.10026  |
| rs12363178 | OR52N4       | G/T | 11p | G | 0.227678571 | 0.169642857 | 0.100421 |
| rs4151053  | NELL1        | A/G | 11p | A | 0.081081081 | 0.040909091 | 0.100551 |
| rs184437   |              | C/T | 09q | C | 0.258928571 | 0.191964286 | 0.100658 |
| rs3800962  | PRPS1L1      | G/T | 07p | T | 0.401785714 | 0.477678571 | 0.100772 |
| rs495335   | CRISP3       | A/G | 06p | A | 0.379464286 | 0.308035714 | 0.100874 |
| rs10024123 | SMR3A        | C/T | 04q | T | 0.058035714 | 0.026785714 | 0.100945 |
| rs2230399  | ICAM3, RAVR1 | C/G | 19p | C | 0.118181818 | 0.072727273 | 0.100948 |
| rs1912403  | NEDD4        | C/T | 15q | C | 0.071428571 | 0.116071429 | 0.101088 |
| rs3802278  | SULF1        | A/G | 08q | A | 0.225225225 | 0.290178571 | 0.101157 |

|            |              |     |     |   |             |             |          |
|------------|--------------|-----|-----|---|-------------|-------------|----------|
| rs7018449  | ZNF704       | C/T | 08q | C | 0.054054054 | 0.09375     | 0.101306 |
| rs2269380  | MAPK8IP2     | C/T | 22q | C | 0.102678571 | 0.151785714 | 0.101345 |
| rs1060242  | ADHFE1       | C/T | 08q | C | 0.477477478 | 0.446428571 | 0.101521 |
| rs2001616  | DUOX2        | A/G | 15q | G | 0.131818182 | 0.081081081 | 0.1016   |
| rs3197999  | MST1         | C/T | 03p | T | 0.28125     | 0.357142857 | 0.101713 |
| rs9247     | INPP5D       | C/T | 02q | T | 0.245535714 | 0.183035714 | 0.101978 |
| rs3795251  | ASB17        | C/T | 01p | T | 0.40990991  | 0.333333333 | 0.102546 |
| rs6719500  | DNAH7        | C/T | 02q | C | 0.161616162 | 0.106796116 | 0.102689 |
| rs2693661  |              | C/G | 07p | C | 0.203703704 | 0.144144144 | 0.102789 |
| rs259370   | C6orf103     | C/T | 06q | T | 0.491071429 | 0.415178571 | 0.103088 |
| rs10775558 | ZNF818       | A/G | 19q | G | 0.40625     | 0.330357143 | 0.103142 |
| rs10853858 | ZNF818       | A/G | 19q | G | 0.40625     | 0.330357143 | 0.103142 |
| rs7079481  | MYPN         | A/C | 10q | C | 0.46875     | 0.455357143 | 0.103229 |
| rs2254419  | C10orf92     | A/G | 10q | A | 0.34375     | 0.272321429 | 0.103276 |
| rs1341044  | OR1N2        | G/T | 09q | T | 0.279279279 | 0.351351351 | 0.10335  |
| rs4978584  | DFNB31       | C/T | 09q | T | 0.25        | 0.1875      | 0.103546 |
| rs10735810 | VDR          | A/G | 12q | A | 0.392857143 | 0.315315315 | 0.103681 |
| rs1042602  | TYR          | A/C | 11q | A | 0.459459459 | 0.379807692 | 0.104443 |
| rs4763862  | GPR19        | C/T | 12p | C | 0.085585586 | 0.045454545 | 0.104522 |
| rs1888257  |              | C/T | 13q | C | 0.482142857 | 0.40625     | 0.104822 |
| rs2974617  | TRIM36       | C/T | 05q | C | 0.066964286 | 0.031531531 | 0.104835 |
| rs905871   | OR51D1       | C/T | 11p | C | 0.339285714 | 0.267857143 | 0.105506 |
| rs3015858  | TYW1         | C/T | 07q | C | 0.231481481 | 0.169724771 | 0.105649 |
| rs2288868  | ZNF577       | C/T | 19q | C | 0.446428571 | 0.370535714 | 0.105759 |
| rs2288034  | LOC729251    | C/G | 16q | G | 0.379464286 | 0.450892857 | 0.105857 |
| rs7313     | CPVL         | C/T | 07p | T | 0.473214286 | 0.454954955 | 0.106168 |
| rs8046424  | C16orf77     | C/G | 16q | C | 0.422727273 | 0.495495495 | 0.106241 |
| rs4371716  | CDH12        | C/T | 05p | T | 0.263392857 | 0.196428571 | 0.106328 |
| rs3742262  | RP11-125A7.3 | C/T | 13q | C | 0.348214286 | 0.276785714 | 0.106461 |
| rs7533274  | L1TD1        | A/G | 01p | G | 0.36036036  | 0.288288288 | 0.10666  |
| rs401416   |              | C/G | 22q | G | 0.495454546 | 0.419642857 | 0.1067   |
| rs10769054 | OR52H1       | C/T | 11p | C | 0.387387387 | 0.459821429 | 0.106903 |
| rs7777835  | NACAD        | C/T | 07p | T | 0.352678571 | 0.424107143 | 0.106913 |
| rs7560262  | C2orf3       | C/T | 02p | C | 0.460784314 | 0.461165048 | 0.107192 |
| rs10931715 | DNAH7        | A/G | 02q | G | 0.392857143 | 0.321428571 | 0.10727  |
| rs578629   |              | A/C | 16p | A | 0.107142857 | 0.160714286 | 0.107366 |
| rs2083914  | MCPH1        | G/T | 08p | T | 0.205357143 | 0.144144144 | 0.107366 |

|            |                      |     |     |   |             |             |          |
|------------|----------------------|-----|-----|---|-------------|-------------|----------|
| rs1289658  | TRIM45               | A/G | 01p | G | 0.467889908 | 0.395454546 | 0.107419 |
| rs4674941  | DOCK10               | C/G | 02q | C | 0.125       | 0.183035714 | 0.107531 |
| rs10219555 | MON2                 | A/G | 12q | A | 0.378378378 | 0.454545454 | 0.107633 |
| rs10914430 |                      | A/G | 01p | A | 0.428571429 | 0.352678571 | 0.107662 |
| rs3752448  | CG018                | A/T | 13q | A | 0.174107143 | 0.232142857 | 0.107676 |
| rs1544131  |                      | A/G | 01p | A | 0.075892857 | 0.040178571 | 0.107713 |
| rs10769699 | DNHD1                | A/G | 11p | A | 0.482142857 | 0.400900901 | 0.107788 |
| rs6927706  | KIAA1244, PBOV1      | A/G | 06q | G | 0.099099099 | 0.058035714 | 0.107925 |
| rs7562391  | PPIL3                | A/C | 02q | C | 0.174107143 | 0.120535714 | 0.108137 |
| rs300169   | FLJ40869             | C/T | 02p | C | 0.348214286 | 0.424107143 | 0.108271 |
| rs11580409 | C1orf173             | A/C | 01p | C | 0.477678571 | 0.401785714 | 0.108297 |
| rs14121    | VEZT                 | A/G | 12q | G | 0.371287129 | 0.296116505 | 0.108341 |
| rs293712   |                      | A/G | 20q | A | 0.3125      | 0.382882883 | 0.108883 |
| rs10795583 | TAF3                 | C/G | 10p | G | 0.454545455 | 0.378378378 | 0.109691 |
| rs1367117  | APOB                 | A/G | 02p | A | 0.366071429 | 0.294642857 | 0.109814 |
| rs986178   | BTBD16               | A/G | 10q | A | 0.145454545 | 0.096330275 | 0.10988  |
| rs11040198 | LOC120824            | A/G | 11p | A | 0.175675676 | 0.236363636 | 0.109899 |
| rs2305948  | KDR                  | C/T | 04q | T | 0.066964286 | 0.112612613 | 0.110004 |
| rs6578533  | OR52R1               | A/T | 11p | A | 0.325892857 | 0.401785714 | 0.110123 |
| rs4801970  | ZNF818               | C/G | 19q | G | 0.405405405 | 0.330357143 | 0.110178 |
| rs595413   | C6orf146             | C/T | 06p | C | 0.21875     | 0.279279279 | 0.11065  |
| rs1878061  | CD300E               | C/T | 17q | T | 0.405405405 | 0.477678571 | 0.110674 |
| rs1148098  |                      | C/T | 11q | T | 0.18018018  | 0.123853211 | 0.110721 |
| rs4304840  | CLEC4D               | A/G | 12p | G | 0.236607143 | 0.174107143 | 0.110739 |
| rs4822063  | SREBF2               | C/G | 22q | C | 0.25        | 0.322727273 | 0.110938 |
| rs1509123  | FBXO39               | A/G | 17p | A | 0.09375     | 0.053571429 | 0.111095 |
| rs6271     | DBH                  | C/T | 09q | T | 0.075892857 | 0.040909091 | 0.111157 |
| rs10781150 |                      | C/T | 09q | C | 0.28125     | 0.348214286 | 0.111255 |
| rs2275992  |                      | A/G | 11q | G | 0.245535714 | 0.3125      | 0.111271 |
| rs2035639  | SYT9                 | C/G | 11p | C | 0.464285714 | 0.391891892 | 0.111304 |
| rs200484   | HIST1H2AI, HIST1H2BL | A/G | 06p | G | 0.076576577 | 0.120535714 | 0.111357 |
| rs2285751  | RNF126               | C/T | 19p | T | 0.053571429 | 0.022321429 | 0.111382 |
| rs9994029  |                      | A/G | 04p | G | 0.391891892 | 0.468468469 | 0.11139  |
| rs10206850 | THSD7B               | A/G | 02q | A | 0.477678571 | 0.401785714 | 0.111634 |
| rs11071986 | CALML4               | A/G | 15q | G | 0.482142857 | 0.404545455 | 0.111749 |
| rs11004439 | PCDH15               | A/C | 10q | C | 0.272321429 | 0.207207207 | 0.111995 |
| rs2641563  | KIAA1975             | C/T | 10q | T | 0.196428571 | 0.25        | 0.112121 |

|            |                 |     |     |   |             |             |          |
|------------|-----------------|-----|-----|---|-------------|-------------|----------|
| rs9293796  | MTX3            | C/G | 05q | C | 0.09375     | 0.144144144 | 0.112261 |
| rs7097397  |                 | A/G | 10q | A | 0.293577982 | 0.364485981 | 0.112316 |
| rs10867332 |                 | C/G | 09q | C | 0.211711712 | 0.153153153 | 0.112368 |
| rs11138018 |                 | C/T | 09q | T | 0.157657658 | 0.107142857 | 0.112451 |
| rs2444263  | RIF1            | C/T | 02q | C | 0.383928571 | 0.3125      | 0.112482 |
| rs7803620  | FLJ21062        | C/G | 07q | C | 0.175257732 | 0.239583333 | 0.112507 |
| rs238239   | ENO3            | C/T | 17p | T | 0.375       | 0.450450451 | 0.112857 |
| rs952374   | RAB6IP1         | C/G | 11p | G | 0.245535714 | 0.308035714 | 0.112879 |
| rs1792326  |                 | C/T | 11q | T | 0.098214286 | 0.147321429 | 0.112967 |
| rs7173826  | FLJ11506        | G/T | 15q | G | 0.361607143 | 0.294642857 | 0.113061 |
| rs4681904  | CCDC66          | C/G | 03p | C | 0.091346154 | 0.138095238 | 0.113214 |
| rs832032   | GABRR3          | A/T | 03q | T | 0.15625     | 0.213636364 | 0.113356 |
| rs1558876  | ARSG            | C/G | 17q | G | 0.383928571 | 0.459821429 | 0.113477 |
| rs6077853  | C20orf94        | A/G | 20p | A | 0.174107143 | 0.120535714 | 0.113582 |
| rs5996633  | LOC284890       | A/G | 22q | G | 0.18018018  | 0.236607143 | 0.113812 |
| rs2229080  | DCC             | C/G | 18q | G | 0.333333333 | 0.410714286 | 0.114074 |
| rs12476147 | ZNF804A         | A/T | 02q | A | 0.423423423 | 0.352678571 | 0.114175 |
| rs1545133  | POLR1B          | C/T | 02q | C | 0.352678571 | 0.425925926 | 0.114536 |
| rs2287059  | NOL10           | C/T | 02p | T | 0.276785714 | 0.34375     | 0.114738 |
| rs6544718  | ABCG8           | C/T | 02p | T | 0.153153153 | 0.209821429 | 0.114786 |
| rs3804505  | EFHC1           | C/T | 06p | T | 0.058035714 | 0.026785714 | 0.114879 |
| rs2627043  | TTN             | A/C | 02q | A | 0.200892857 | 0.147321429 | 0.114944 |
| rs7132916  | OR6C1           | A/G | 12q | G | 0.241071429 | 0.18018018  | 0.115097 |
| rs2240308  | AXIN2           | A/G | 17q | G | 0.463963964 | 0.463636364 | 0.115157 |
| rs2227902  | REST            | G/T | 04q | T | 0.102678571 | 0.0625      | 0.115167 |
| rs1108842  | GNL3, PBRM1     | A/C | 03p | C | 0.460784314 | 0.462616822 | 0.115315 |
| rs394732   | BCAS1           | G/T | 20q | T | 0.486607143 | 0.415178571 | 0.115762 |
| rs928777   | TCP10L          | C/T | 21q | C | 0.120535714 | 0.076576577 | 0.11591  |
| rs11606506 | OR4B1           | A/G | 11p | A | 0.165178571 | 0.223214286 | 0.116063 |
| rs3736918  |                 | C/T | 14q | C | 0.101851852 | 0.060747664 | 0.11608  |
| rs11631105 |                 | C/G | 15q | G | 0.118181818 | 0.168224299 | 0.116248 |
| rs2235587  | PSMF1           | C/T | 20p | C | 0.133928571 | 0.1875      | 0.116485 |
| rs681210   |                 | C/T | 21q | T | 0.306306306 | 0.379464286 | 0.116683 |
| rs2243620  |                 | C/T | 07p | T | 0.380733945 | 0.450892857 | 0.116776 |
| rs362003   | SUHW1           | C/T | 22q | T | 0.321428571 | 0.254464286 | 0.116946 |
| rs3737744  | NSUN4           | C/T | 01p | C | 0.410714286 | 0.337837838 | 0.117063 |
| rs10037485 | CYFIP2, C5orf40 | C/T | 05q | T | 0.236607143 | 0.174107143 | 0.11708  |

|            |                              |     |     |   |             |             |          |
|------------|------------------------------|-----|-----|---|-------------|-------------|----------|
| rs20455    | KIF6                         | C/T | 06p | C | 0.446428571 | 0.375       | 0.117082 |
| rs1932618  | BAI3                         | A/G | 06q | A | 0.120535714 | 0.076576577 | 0.117157 |
| rs3803800  | TNFSF13, TNFSF12-<br>TNFSF13 | A/G | 17p | A | 0.21875     | 0.162162162 | 0.117315 |
| rs9830035  |                              | C/T | 03q | T | 0.299107143 | 0.231818182 | 0.117501 |
| rs288326   | FRZB                         | A/G | 02q | A | 0.147321429 | 0.098214286 | 0.117642 |
| rs2072615  |                              | A/G | 14q | A | 0.277227723 | 0.206730769 | 0.117897 |
| rs12214686 |                              | A/G | 06p | G | 0.1875      | 0.131818182 | 0.117998 |
| rs7220988  | KIAA1267                     | A/G | 17q | A | 0.415178571 | 0.34375     | 0.118136 |
| rs4354673  | OR52L1                       | G/T | 11p | T | 0.186363636 | 0.247747748 | 0.118146 |
| rs6823339  |                              | A/C | 04q | A | 0.361904762 | 0.438095238 | 0.118285 |
| rs4808383  | OR10H1                       | C/G | 19p | G | 0.168181818 | 0.228971963 | 0.118295 |
| rs2403730  |                              | A/G | 08q | A | 0.370535714 | 0.303571429 | 0.118554 |
| rs12070228 | TRIM67                       | A/C | 01q | A | 0.121052632 | 0.181818182 | 0.118777 |
| rs1156281  | BRDT                         | A/C | 01p | C | 0.075892857 | 0.040178571 | 0.119204 |
| rs1137078  | HLA-A, HLA-A29.1             | A/G | 06p | G | 0.140909091 | 0.094594595 | 0.119391 |
| rs1055581  | USH1C                        | A/G | 11p | G | 0.458715596 | 0.467889908 | 0.119393 |
| rs11726117 | ALPK1                        | C/T | 04q | T | 0.375       | 0.303571429 | 0.119438 |
| rs10775247 |                              | C/T | 15q | C | 0.361607143 | 0.433035714 | 0.119506 |
| rs10510980 |                              | A/G | 03p | G | 0.148148148 | 0.201834862 | 0.119775 |
| rs10788    | SERGEF                       | C/T | 11p | T | 0.089285714 | 0.135135135 | 0.120192 |
| rs10753110 |                              | A/C | 01q | A | 0.45945946  | 0.464285714 | 0.120284 |
| rs2724693  | DZIP1L                       | C/T | 03q | C | 0.319444444 | 0.247706422 | 0.12049  |
| rs9808377  | TTN                          | A/G | 02q | G | 0.232142857 | 0.174107143 | 0.120614 |
| rs13184    | FLJ40298                     | C/G | 02p | C | 0.165       | 0.225806452 | 0.120698 |
| rs2274654  | LOC375748                    | A/G | 09q | G | 0.174107143 | 0.125       | 0.120702 |
| rs2849233  | MRO                          | C/T | 18q | C | 0.413636364 | 0.345454545 | 0.120784 |
| rs2304821  | PTPRB                        | A/G | 12q | A | 0.142201835 | 0.090909091 | 0.12084  |
| rs1180116  | SMC5                         | A/G | 09q | G | 0.147321429 | 0.089285714 | 0.121055 |
| rs2287657  | LOC729966                    | C/T | 19p | T | 0.272321429 | 0.209821429 | 0.121057 |
| rs7675987  | SCFD2                        | A/G | 04q | G | 0.357142857 | 0.433035714 | 0.121314 |
| rs6580873  | KRT81                        | A/C | 12q | A | 0.232142857 | 0.174107143 | 0.122028 |
| rs2238472  | ABCC6                        | A/G | 16p | A | 0.256880734 | 0.324324324 | 0.12214  |
| rs6445902  | DNAH7L                       | A/C | 03p | C | 0.125       | 0.178571429 | 0.122159 |
| rs3759295  | LOC440093                    | G/T | 12p | G | 0.068181818 | 0.035714286 | 0.122297 |
| rs12057989 |                              | A/G | 01q | G | 0.112612613 | 0.157657658 | 0.122438 |
| rs1451660  |                              | A/C | 11p | A | 0.409090909 | 0.339285714 | 0.122536 |

|            |                  |     |     |   |             |             |          |
|------------|------------------|-----|-----|---|-------------|-------------|----------|
| rs2074466  | OR10C1           | G/T | 06p | T | 0.138392857 | 0.191964286 | 0.122564 |
| rs964039   |                  | C/T | 11q | C | 0.308035714 | 0.241071429 | 0.122847 |
| rs2877380  | CBR4             | A/C | 04q | C | 0.202702703 | 0.263392857 | 0.122862 |
| rs3753841  | COL11A1          | C/T | 01p | C | 0.484848485 | 0.41        | 0.122991 |
| rs1317215  |                  | A/G | 03p | A | 0.063636364 | 0.103603604 | 0.123093 |
| rs2452505  | PHYHIPL, FAM13C1 | C/G | 10q | C | 0.125       | 0.175675676 | 0.123134 |
| rs10831519 | CCDC82           | C/T | 11q | C | 0.151785714 | 0.209821429 | 0.123209 |
| rs2291739  | TIMELESS         | C/T | 12q | C | 0.45045045  | 0.375       | 0.12332  |
| rs11618091 | FLJ44054         | C/T | 13q | C | 0.183035714 | 0.243243243 | 0.124029 |
| rs10414211 | LOC147645        | G/T | 19q | T | 0.364485981 | 0.439814815 | 0.124293 |
| rs9296669  | PKHD1            | A/G | 06p | G | 0.459459459 | 0.464285714 | 0.124318 |
| rs3742569  | FBXO34           | C/T | 14q | C | 0.379464286 | 0.454954955 | 0.124571 |
| rs12150427 | OR1A2            | G/T | 17p | T | 0.339285714 | 0.40625     | 0.124615 |
| rs1734035  | LOC730281        | C/T | 07q | C | 0.241071429 | 0.303571429 | 0.124797 |
| rs12365487 | OR52N1           | G/T | 11p | T | 0.157657658 | 0.108108108 | 0.12504  |
| rs2305246  |                  | C/T | 03p | C | 0.273148148 | 0.351851852 | 0.125064 |
| rs1510765  | PARD3B           | C/T | 02q | T | 0.390909091 | 0.316037736 | 0.125219 |
| rs2657167  | OR52M1           | C/G | 11p | C | 0.383928571 | 0.455357143 | 0.125356 |
| rs1150684  |                  | G/T | 06p | G | 0.050925926 | 0.09009009  | 0.125365 |
| rs4266238  |                  | A/G | 04p | A | 0.405405405 | 0.477678571 | 0.125386 |
| rs370094   | EMR1             | A/G | 19p | A | 0.243243243 | 0.310810811 | 0.125695 |
| rs2275697  | CNTN2            | C/T | 01q | T | 0.193693694 | 0.138392857 | 0.12631  |
| rs276938   | DSC3             | A/G | 18q | A | 0.261261261 | 0.324324324 | 0.126667 |
| rs3784634  | VPS13C           | A/G | 15q | G | 0.464285714 | 0.392857143 | 0.126722 |
| rs7630407  |                  | C/T | 03q | C | 0.357142857 | 0.428571429 | 0.126741 |
| rs9633811  |                  | C/T | 11q | C | 0.410714286 | 0.482142857 | 0.126959 |
| rs1043730  | TRAF3IP2         | A/C | 06q | C | 0.241071429 | 0.183035714 | 0.126968 |
| rs897738   | EMR1             | C/T | 19p | T | 0.241071429 | 0.306306306 | 0.126969 |
| rs2240871  | NCAPD2           | C/G | 12p | G | 0.135514019 | 0.190909091 | 0.127164 |
| rs532637   | OR9G1            | A/G | 11q | G | 0.34375     | 0.40990991  | 0.127719 |
| rs3122712  | FAM71A           | A/G | 01q | G | 0.259090909 | 0.325892857 | 0.128247 |
| rs6917485  | FAM120B          | G/T | 06q | T | 0.111607143 | 0.162162162 | 0.128267 |
| rs9876490  | TRIM42           | A/C | 03q | C | 0.370535714 | 0.441441441 | 0.128273 |
| rs4925583  | OR2L13, OR2L8    | A/G | 01q | A | 0.067567568 | 0.035714286 | 0.128539 |
| rs964307   | PKHD1L1          | A/G | 08q | G | 0.316964286 | 0.254464286 | 0.128623 |
| rs4146960  | RASEF            | A/G | 09q | G | 0.45045045  | 0.477678571 | 0.128664 |
| rs3816614  | LRP4             | C/T | 11p | C | 0.285714286 | 0.223214286 | 0.128894 |



|            |                      |     |     |   |             |             |          |
|------------|----------------------|-----|-----|---|-------------|-------------|----------|
| rs10140007 | C14orf100, C14orf149 | C/T | 14q | C | 0.446428571 | 0.375       | 0.128952 |
| rs3750207  | ZC3H3                | A/C | 08q | C | 0.222222222 | 0.290909091 | 0.129028 |
| rs6007808  | LOC388915            | C/T | 22q | C | 0.382882883 | 0.455357143 | 0.129168 |
| rs1716     | ITGAE                | C/T | 17p | T | 0.366071429 | 0.299107143 | 0.129263 |
| rs1374570  | OR6Q1, OR9Q1         | C/G | 11q | G | 0.454954955 | 0.473214286 | 0.129343 |
| rs2341433  | OR52B6               | A/G | 11p | A | 0.434579439 | 0.354545454 | 0.129549 |
| rs3826709  | KRI1                 | C/G | 19p | C | 0.458333333 | 0.387254902 | 0.129746 |
| rs3009024  |                      | A/G | 03p | G | 0.352678571 | 0.285714286 | 0.129855 |
| rs1801693  | LPA                  | C/T | 06q | T | 0.370535714 | 0.299107143 | 0.130129 |
| rs1966949  |                      | C/G | 08p | G | 0.178571429 | 0.125       | 0.130134 |
| rs897065   |                      | C/T | 02p | T | 0.153153153 | 0.107142857 | 0.130541 |
| rs4931826  | LOC283755            | A/C | 15q | A | 0.20754717  | 0.261682243 | 0.130643 |
| rs381406   | ITGB2                | G/T | 21q | T | 0.415178571 | 0.486607143 | 0.131035 |
| rs9897794  | EFCAB5               | G/T | 17q | G | 0.481981982 | 0.445945946 | 0.131197 |
| rs1414125  |                      | G/T | 10p | G | 0.433035714 | 0.495535714 | 0.131199 |
| rs12125187 | OR2L13               | C/T | 01q | T | 0.369369369 | 0.297297297 | 0.131283 |
| rs2296225  | KIF17                | C/T | 01p | C | 0.075892857 | 0.040178571 | 0.131355 |
| rs7927385  | OR8D4                | A/G | 11q | G | 0.352678571 | 0.290178571 | 0.131532 |
| rs910270   |                      | C/T | 01p | T | 0.298165138 | 0.361111111 | 0.131683 |
| rs2292288  | DMN                  | C/T | 15q | C | 0.473214286 | 0.455357143 | 0.131877 |
| rs7132347  | OR6C1                | C/G | 12q | C | 0.241071429 | 0.183035714 | 0.13192  |
| rs3732215  | DKFZp762E1312        | C/G | 02q | G | 0.441441441 | 0.490990991 | 0.132156 |
| rs4509745  | OVCH2                | C/T | 11p | C | 0.412844037 | 0.34375     | 0.132209 |
| rs2183443  |                      | A/G | 13q | A | 0.071428571 | 0.111607143 | 0.132278 |
| rs1709851  |                      | G/T | 02q | G | 0.356481481 | 0.288461538 | 0.132427 |
| rs1030726  | OR51F1               | G/T | 11p | T | 0.205357143 | 0.265765766 | 0.132428 |
| rs2270962  | CWF19L1              | A/G | 10q | A | 0.085585586 | 0.049549549 | 0.13252  |
| rs4818948  | C21orf29, KRTAP10-10 | C/G | 21q | C | 0.050458716 | 0.013513513 | 0.132606 |
| rs12500797 | PTPN13               | A/G | 04q | A | 0.151785714 | 0.107142857 | 0.132652 |
| rs225014   | DIO2                 | C/T | 14q | C | 0.325892857 | 0.397321429 | 0.132813 |
| rs1919954  |                      | A/G | 07q | G | 0.464285714 | 0.464285714 | 0.133059 |
| rs2249778  | TCL6                 | A/G | 14q | G | 0.178571429 | 0.238738739 | 0.133092 |
| rs4456825  |                      | C/T | 03p | T | 0.433035714 | 0.491071429 | 0.133145 |
| rs469390   | MX1                  | A/G | 21q | G | 0.450450451 | 0.379464286 | 0.133415 |
| rs7468423  |                      | C/G | 09q | C | 0.196428571 | 0.254464286 | 0.133441 |
| rs7049042  | OR13F1               | C/T | 09q | T | 0.324324324 | 0.259090909 | 0.133453 |
| rs9367358  | C6orf140             | A/C | 06p | A | 0.1875      | 0.133928571 | 0.133487 |

|            |           |     |     |   |             |             |          |
|------------|-----------|-----|-----|---|-------------|-------------|----------|
| rs676913   | GBP7      | A/G | 01p | G | 0.346846847 | 0.412844037 | 0.133577 |
| rs2587070  | BCL2L13   | G/T | 22q | G | 0.236607143 | 0.178571429 | 0.133722 |
| rs2195951  | OR7G1     | A/G | 19p | G | 0.200892857 | 0.148648649 | 0.133739 |
| rs1939015  | MMP27     | A/G | 11q | G | 0.209821429 | 0.153153153 | 0.133951 |
| rs2275902  | ELTD1     | C/G | 01p | C | 0.361607143 | 0.294642857 | 0.133979 |
| rs2303772  | KLHDC4    | C/G | 16q | C | 0.058558559 | 0.097222222 | 0.134143 |
| rs2490085  | CCNYL2    | A/T | 10q | T | 0.268867925 | 0.336538462 | 0.134152 |
| rs10900862 | LOC202051 | C/T | 05q | C | 0.328828829 | 0.397321429 | 0.134224 |
| rs3739510  | LAMC3     | C/G | 09q | G | 0.205357143 | 0.151785714 | 0.134258 |
| rs3738496  | LEPRE1    | A/T | 01p | T | 0.09375     | 0.13963964  | 0.134291 |
| rs2071214  | BIRC5     | A/G | 17q | G | 0.054054054 | 0.090909091 | 0.134317 |
| rs759458   | SLC1A4    | C/T | 02p | T | 0.256756757 | 0.321428571 | 0.134355 |
| rs1114117  |           | C/T | 02p | C | 0.217592593 | 0.160550459 | 0.134379 |
| rs10950797 | IQCE      | A/G | 07p | A | 0.099099099 | 0.147321429 | 0.134673 |
| rs2042791  | SPAG16    | A/C | 02q | C | 0.308035714 | 0.370535714 | 0.134731 |
| rs361377   |           | A/G | 07q | A | 0.459821429 | 0.387387387 | 0.134785 |
| rs6560142  | TRPM3     | C/T | 09q | C | 0.495535714 | 0.433035714 | 0.134917 |
| rs4946188  | C6orf113  | C/T | 06q | C | 0.222727273 | 0.283018868 | 0.135158 |
| rs9371533  | RAET1E    | A/G | 06q | A | 0.064516129 | 0.021978022 | 0.1354   |
| rs3813474  | ADAMTS12  | A/G | 05p | G | 0.133928571 | 0.089285714 | 0.135424 |
| rs8065506  | ZNF624    | A/C | 17p | A | 0.352678571 | 0.290178571 | 0.135835 |
| rs12071728 | LOC729806 | C/T | 01q | C | 0.419642857 | 0.486607143 | 0.136121 |
| rs2243897  | LOC340900 | C/T | 10p | C | 0.299107143 | 0.232142857 | 0.136234 |
| rs2015018  | CHSY-2    | C/T | 05q | T | 0.202702703 | 0.261261261 | 0.136624 |
| rs1919811  | FLJ45974  | G/T | 07p | G | 0.433035714 | 0.495535714 | 0.137029 |
| rs368865   | ATP11A    | A/G | 13q | A | 0.297297297 | 0.236363636 | 0.137268 |
| rs10838851 | OR4X1     | A/T | 11p | T | 0.243119266 | 0.3125      | 0.137487 |
| rs4252125  | PLG       | A/G | 06q | A | 0.354545454 | 0.289719626 | 0.137584 |
| rs6905356  | FAM120B   | C/T | 06q | C | 0.111607143 | 0.160714286 | 0.137926 |
| rs3736582  | PSTK      | C/G | 10q | C | 0.325688073 | 0.266990291 | 0.138436 |
| rs6557634  | TNFRSF10A | C/T | 08p | T | 0.433035714 | 0.495535714 | 0.138473 |
| rs1531862  | LOC728073 | C/T | 17q | C | 0.299107143 | 0.366071429 | 0.138994 |
| rs12602536 | AP1GBP1   | C/T | 17q | C | 0.129464286 | 0.178571429 | 0.139467 |
| rs9297853  | LRRRC6    | A/G | 08q | G | 0.102678571 | 0.148648649 | 0.139636 |
| rs1107947  | FGFBP3    | A/T | 10q | T | 0.223214286 | 0.281818182 | 0.139698 |
| rs640729   | NEBL      | C/T | 10p | C | 0.342342342 | 0.410714286 | 0.139927 |
| rs6464009  |           | A/G | 07p | G | 0.333333333 | 0.267857143 | 0.14011  |

|            |                  |     |     |   |             |             |          |
|------------|------------------|-----|-----|---|-------------|-------------|----------|
| rs4438413  | ZNF525           | A/G | 19q | G | 0.382882883 | 0.450892857 | 0.140571 |
| rs10036567 | KIAA0141         | C/T | 05q | C | 0.084821429 | 0.049107143 | 0.140643 |
| rs2374390  | LOC285047        | A/G | 02p | A | 0.379464286 | 0.446428571 | 0.14088  |
| rs2280099  | TIGD2            | C/T | 04q | C | 0.1875      | 0.138392857 | 0.140987 |
| rs236151   | CHGB             | A/G | 20p | A | 0.247663551 | 0.308823529 | 0.141249 |
| rs7021366  | CTNNAL1          | C/G | 09q | G | 0.316964286 | 0.254464286 | 0.141445 |
| rs9809404  | SLC9A10          | C/T | 03q | T | 0.36407767  | 0.431578947 | 0.141555 |
| rs3205421  | CHPT1            | C/T | 12q | C | 0.263392857 | 0.325892857 | 0.14164  |
| rs2295283  | RP5-1077B9.4     | A/G | 01p | A | 0.334821429 | 0.267857143 | 0.141786 |
| rs4656197  | SCYL3            | C/T | 01q | T | 0.459821429 | 0.392857143 | 0.141961 |
| rs1977172  |                  | G/T | 06p | T | 0.072115385 | 0.12037037  | 0.142394 |
| rs10007789 | TRIM61           | C/T | 04q | C | 0.464285714 | 0.46875     | 0.142453 |
| rs1014286  | SLC9A4           | C/T | 02q | C | 0.274774775 | 0.337837838 | 0.14253  |
| rs818620   | RINT1            | C/G | 07q | C | 0.130630631 | 0.183486238 | 0.142573 |
| rs7282594  |                  | A/G | 21q | A | 0.401785714 | 0.334821429 | 0.142596 |
| rs4707358  | GJB7             | A/G | 06q | G | 0.495535714 | 0.428571429 | 0.142599 |
| rs231267   |                  | G/T | 04q | T | 0.397321429 | 0.330357143 | 0.142688 |
| rs678084   | WDR76            | G/T | 15q | T | 0.214285714 | 0.160714286 | 0.142707 |
| rs11240573 | FLJ32569         | C/T | 01q | T | 0.09009009  | 0.053571429 | 0.143065 |
| rs3738099  | ALPL             | A/G | 01p | G | 0.15        | 0.103603604 | 0.143088 |
| rs4973588  | NGEF             | A/G | 02q | A | 0.178571429 | 0.126126126 | 0.143202 |
| rs7639705  | MCF2L2           | G/T | 03q | G | 0.165178571 | 0.21875     | 0.143347 |
| rs1891343  |                  | C/T | 16q | T | 0.076190476 | 0.11682243  | 0.143447 |
| rs2638880  | MUC19, LOC730512 | A/T | 12q | A | 0.285714286 | 0.223214286 | 0.143566 |
| rs1805794  | NBN              | C/G | 08q | G | 0.352678571 | 0.285714286 | 0.143733 |
| rs929156   | TRIM15           | C/T | 06p | T | 0.21875     | 0.279279279 | 0.143784 |
| rs9425343  | EDEM3            | A/C | 01q | C | 0.34375     | 0.410714286 | 0.14381  |
| rs1873511  |                  | A/G | 01q | G | 0.46875     | 0.401785714 | 0.143864 |
| rs1873510  |                  | C/T | 01q | C | 0.46875     | 0.401785714 | 0.143864 |
| rs2168749  | KLRA1            | A/G | 12p | A | 0.472972973 | 0.455357143 | 0.14388  |
| rs2474329  | LRRC27           | A/G | 10q | A | 0.209821429 | 0.267857143 | 0.144156 |
| rs6079391  | FLRT3, MACROD2   | G/T | 20p | G | 0.486607143 | 0.441964286 | 0.144388 |
| rs1065212  | HSPC111          | A/G | 05q | G | 0.126126126 | 0.084821429 | 0.144637 |
| rs7503034  | SGSH             | C/T | 17q | T | 0.375       | 0.308035714 | 0.144728 |
| rs86312    | NAGLU            | C/G | 17q | C | 0.056603774 | 0.091743119 | 0.145237 |
| rs3218634  | POLQ             | C/G | 03q | G | 0.085585586 | 0.049107143 | 0.145345 |
| rs6657480  | KIAA1799         | C/T | 01p | C | 0.129807692 | 0.18556701  | 0.145394 |

|            |                      |     |     |   |             |             |          |
|------------|----------------------|-----|-----|---|-------------|-------------|----------|
| rs10420734 | LOC401898, LOC730571 | C/T | 19p | C | 0.345454545 | 0.409090909 | 0.145418 |
| rs3731722  | AOX1                 | C/T | 02q | C | 0.053571429 | 0.089285714 | 0.145446 |
| rs6781844  | SLC9A10              | G/T | 03q | G | 0.200892857 | 0.259090909 | 0.14569  |
| rs7918199  | MKI67                | C/T | 10q | T | 0.09375     | 0.058035714 | 0.145789 |
| rs11953798 | NY-REN-7, LOC653314  | C/T | 05q | T | 0.4375      | 0.495535714 | 0.145789 |
| rs13874    | SLC25A26             | A/G | 03p | A | 0.410714286 | 0.477272727 | 0.14599  |
| rs321937   | ZNF610               | C/G | 19q | C | 0.083333333 | 0.047619048 | 0.146099 |
| rs7863750  | HIATL1               | A/G | 09q | A | 0.117117117 | 0.077981651 | 0.146107 |
| rs9604128  | LOC649907            | C/T | 13q | T | 0.360576923 | 0.290476191 | 0.146272 |
| rs10908656 |                      | A/G | 01q | A | 0.468468468 | 0.401785714 | 0.146317 |
| rs3795243  | NCAPG                | C/G | 04p | G | 0.107142857 | 0.15625     | 0.146489 |
| rs3743749  | ADAMTS18             | C/G | 16q | C | 0.154545454 | 0.104545454 | 0.146818 |
| rs10904368 | tAKR                 | A/G | 10p | A | 0.245535714 | 0.189189189 | 0.147012 |
| rs11187895 | NOC3L                | C/G | 10q | C | 0.110091743 | 0.072072072 | 0.147062 |
| rs2286007  | WNK1                 | C/T | 12p | T | 0.071428571 | 0.040178571 | 0.14755  |
| rs2961135  | OR2A25               | C/G | 07q | G | 0.445454545 | 0.486607143 | 0.147602 |
| rs1046428  | GSTZ1                | C/T | 14q | T | 0.205357143 | 0.153153153 | 0.147718 |
| rs7257872  | ZNF584               | A/G | 19q | G | 0.303571429 | 0.241071429 | 0.147737 |
| rs462779   | REV3L                | C/T | 06q | C | 0.205357143 | 0.151785714 | 0.147871 |
| rs1058992  | MAP9                 | A/G | 04q | G | 0.254464286 | 0.198198198 | 0.147904 |
| rs1526835  |                      | C/T | 12q | T | 0.112612613 | 0.160714286 | 0.148107 |
| rs5744934  | POLE                 | A/G | 12q | G | 0.205357143 | 0.151785714 | 0.148141 |
| rs2171497  | KIAA0748             | C/G | 12q | C | 0.081081081 | 0.120535714 | 0.148261 |
| rs1866374  | MAP1B                | C/T | 05q | T | 0.177272727 | 0.126126126 | 0.148332 |
| rs11244275 | LAMC3                | C/T | 09q | T | 0.071428571 | 0.040909091 | 0.148353 |
| rs800292   | CFH                  | C/T | 01q | T | 0.1875      | 0.241071429 | 0.148422 |
| rs7232237  | ASXL3                | A/G | 18q | A | 0.490476191 | 0.435643564 | 0.14849  |
| rs2642992  | ZNF695               | C/T | 01q | T | 0.391891892 | 0.325688073 | 0.148565 |
| rs10744716 | LEPREL2              | A/G | 12p | G | 0.398058252 | 0.471428571 | 0.148925 |
| rs3762672  | DNAJC13              | G/T | 03q | T | 0.477678571 | 0.450450451 | 0.148949 |
| rs2696914  | TRIM49, LOC283116    | G/T | 11p | G | 0.144144144 | 0.189189189 | 0.148982 |
| rs10935282 | FAM62C               | A/G | 03q | A | 0.486363636 | 0.444444444 | 0.149163 |
| rs4251545  | IRAK4                | A/G | 12q | A | 0.081081081 | 0.123853211 | 0.149259 |
| rs4974564  |                      | A/G | 04p | G | 0.348214286 | 0.286363636 | 0.149277 |
| rs10494745 |                      | A/G | 01q | A | 0.117117117 | 0.077272727 | 0.149507 |
| rs7192     | HLA-DRA              | G/T | 06p | T | 0.379464286 | 0.445945946 | 0.149646 |
| rs2070235  | MYBL2                | A/G | 20q | G | 0.111607143 | 0.071428571 | 0.149878 |

|            |                     |     |     |   |             |             |          |
|------------|---------------------|-----|-----|---|-------------|-------------|----------|
| rs1174657  | RGL1, APOBEC4       | C/T | 01q | C | 0.415178571 | 0.348214286 | 0.149949 |
| rs3219156  | ALS2                | A/G | 02q | G | 0.117117117 | 0.075892857 | 0.150335 |
| rs1050354  | PPIG                | A/T | 02q | T | 0.427927928 | 0.361607143 | 0.150346 |
| rs3735318  |                     | C/T | 07q | C | 0.46875     | 0.463636364 | 0.15036  |
| rs605734   | OR5M3               | A/T | 11q | T | 0.196428571 | 0.254464286 | 0.150412 |
| rs315675   | ZCCHC4              | A/T | 04p | A | 0.129464286 | 0.089285714 | 0.150429 |
| rs2593943  | MORC1               | A/G | 03q | A | 0.46875     | 0.400900901 | 0.150644 |
| rs848210   | SPEN                | A/G | 01p | A | 0.388392857 | 0.459459459 | 0.150845 |
| rs1965370  | LOC120824           | C/G | 11p | C | 0.175675676 | 0.22972973  | 0.150881 |
| rs2274616  | ITGA10              | C/T | 01q | T | 0.133928571 | 0.183035714 | 0.151163 |
| rs9669382  | PTPRQ               | A/G | 12q | G | 0.225225225 | 0.171171171 | 0.151191 |
| rs4645434  | SYNE1               | A/C | 06q | C | 0.366071429 | 0.433035714 | 0.151446 |
| rs1566286  | C17orf80            | A/G | 17q | G | 0.477477478 | 0.410714286 | 0.151454 |
| rs11883500 | MLPH                | C/T | 02q | T | 0.130630631 | 0.181818182 | 0.151553 |
| rs1403812  | OR13F1              | C/T | 09q | T | 0.322727273 | 0.259433962 | 0.151641 |
| rs1133833  | C11orf17            | C/T | 11p | T | 0.234234234 | 0.294642857 | 0.151777 |
| rs11743570 |                     | C/G | 05q | C | 0.098214286 | 0.142857143 | 0.151987 |
| rs532411   | POLQ                | C/T | 03q | T | 0.084821429 | 0.049107143 | 0.152042 |
| rs487848   | POLQ                | A/G | 03q | A | 0.084821429 | 0.049107143 | 0.152042 |
| rs3204953  | REV3L               | A/G | 06q | A | 0.178571429 | 0.129464286 | 0.152075 |
| rs3813535  | STON2               | C/T | 14q | T | 0.129464286 | 0.178571429 | 0.15229  |
| rs1265284  |                     | G/T | 06p | T | 0.486607143 | 0.418918919 | 0.152428 |
| rs12102203 | DMXL2               | A/G | 15q | A | 0.463963964 | 0.46875     | 0.15245  |
| rs10961689 | FREM1               | G/T | 09p | T | 0.223214286 | 0.283783784 | 0.152486 |
| rs1727     | IFIT2               | A/C | 10q | C | 0.223214286 | 0.283783784 | 0.152499 |
| rs8069344  | GUCY2D              | A/T | 17p | A | 0.116071429 | 0.160714286 | 0.152646 |
| rs821616   | DISC1               | A/T | 01q | A | 0.325892857 | 0.267857143 | 0.152759 |
| rs6537662  |                     | A/G | 01p | G | 0.28125     | 0.223214286 | 0.152841 |
| rs2035820  | FAM44A              | A/G | 04p | A | 0.196428571 | 0.147321429 | 0.152869 |
| rs233252   | C21orf29, KRTAP10-3 | C/T | 21q | C | 0.075892857 | 0.044642857 | 0.152883 |
| rs3859474  | PSG4                | A/G | 19q | G | 0.468468469 | 0.396396396 | 0.153137 |
| rs10896488 | OR5M10              | A/G | 11q | G | 0.193693694 | 0.25        | 0.153167 |
| rs4760600  | FKBP11, CCDC65      | C/T | 12q | C | 0.348214286 | 0.414414414 | 0.153208 |
| rs1054565  | TAF1B               | A/G | 02p | A | 0.263636364 | 0.327102804 | 0.153258 |
| rs4233367  | ADAMTS4             | C/T | 01q | T | 0.340909091 | 0.409090909 | 0.153329 |
| rs1556250  |                     | A/G | 09p | G | 0.108108108 | 0.068807339 | 0.153548 |
| rs586339   | JMJD2A              | G/T | 01p | G | 0.286363636 | 0.227272727 | 0.153623 |

|            |                  |     |     |   |             |             |          |
|------------|------------------|-----|-----|---|-------------|-------------|----------|
| rs2839158  | LSS              | C/T | 21q | T | 0.142857143 | 0.191964286 | 0.153696 |
| rs443658   | EMR1             | C/T | 19p | C | 0.22        | 0.282828283 | 0.153986 |
| rs2571174  |                  | C/T | 19q | C | 0.084821429 | 0.125       | 0.154068 |
| rs7799     | ELF1             | A/G | 13q | A | 0.3125      | 0.373873874 | 0.154145 |
| rs3765604  |                  | C/G | 06p | C | 0.135135135 | 0.09375     | 0.154201 |
| rs640573   |                  | C/G | 01p | G | 0.473214286 | 0.40990991  | 0.154271 |
| rs6461247  |                  | C/T | 07p | C | 0.191964286 | 0.142857143 | 0.154375 |
| rs1131877  | TRAF3            | A/G | 14q | G | 0.258928571 | 0.200892857 | 0.154397 |
| rs1052559  |                  | A/C | 19q | C | 0.397321429 | 0.328828829 | 0.154642 |
| rs2062553  |                  | G/T | 16q | T | 0.424107143 | 0.490990991 | 0.15469  |
| rs8099409  | C18orf45         | A/G | 18q | A | 0.486486486 | 0.419642857 | 0.154839 |
| rs9002     | GPR125           | A/G | 04p | A | 0.245454545 | 0.189189189 | 0.154863 |
| rs2244507  | LIMS2            | A/G | 02q | A | 0.361607143 | 0.428571429 | 0.154947 |
| rs3761863  | LRRK2            | A/G | 12q | A | 0.339285714 | 0.40625     | 0.154961 |
| rs4434123  | SLC9A10          | A/G | 03q | G | 0.202702703 | 0.258928571 | 0.155015 |
| rs2638866  | MUC19, LOC647546 | A/G | 12q | G | 0.129464286 | 0.085585586 | 0.155055 |
| rs1871892  | FNDC8            | C/T | 17q | T | 0.308035714 | 0.370535714 | 0.155161 |
| rs542939   | LOC116236        | C/T | 17q | T | 0.40625     | 0.34375     | 0.155173 |
| rs1745689  | SLC35F4          | C/T | 14q | T | 0.285714286 | 0.227678571 | 0.155204 |
| rs4619     | IGFBP1           | A/G | 07p | G | 0.325892857 | 0.392857143 | 0.155247 |
| rs2270669  | COL6A3           | C/G | 02q | G | 0.202830189 | 0.26        | 0.155495 |
| rs1476859  | OR1B1            | C/T | 09q | T | 0.316964286 | 0.258928571 | 0.155563 |
| rs2295778  | HIF1AN           | C/G | 10q | G | 0.28125     | 0.223214286 | 0.155654 |
| rs3828551  |                  | A/G | 04q | A | 0.178571429 | 0.129464286 | 0.15572  |
| rs2290130  | B3GNT7           | C/T | 02q | T | 0.294642857 | 0.234234234 | 0.156054 |
| rs272893   | SLC22A4          | A/G | 05q | A | 0.348214286 | 0.412844037 | 0.156166 |
| rs3746013  | FCGBP            | C/G | 19q | G | 0.223214286 | 0.169642857 | 0.156355 |
| rs3740912  | CDON             | C/T | 11q | C | 0.473214286 | 0.40625     | 0.156438 |
| rs10122426 |                  | A/G | 09q | G | 0.169642857 | 0.125       | 0.156492 |
| rs2280467  |                  | C/T | 15q | C | 0.276785714 | 0.21875     | 0.156593 |
| rs68352    | C2orf58          | C/T | 02p | C | 0.455357143 | 0.392857143 | 0.156783 |
| rs10774482 | ERC1             | C/G | 12p | C | 0.384259259 | 0.445945946 | 0.15708  |
| rs1051061  | VRK2             | A/G | 02p | G | 0.375       | 0.315315315 | 0.157107 |
| rs2292830  | CLCA3            | C/G | 01p | C | 0.468468468 | 0.40625     | 0.157202 |
| rs2306134  | PPP4R1           | C/T | 18p | T | 0.142857143 | 0.191964286 | 0.157268 |
| rs2457569  | LPAL2, LOC732058 | C/G | 06q | C | 0.348214286 | 0.283783784 | 0.157318 |
| rs1884444  | IL23R            | G/T | 01p | T | 0.4375      | 0.495535714 | 0.157523 |

|            |                |     |     |   |             |             |          |
|------------|----------------|-----|-----|---|-------------|-------------|----------|
| rs4381620  | LOC388210      | C/T | 16p | T | 0.147321429 | 0.102678571 | 0.157607 |
| rs2075761  | FGL2, KIAA1505 | A/G | 07q | A | 0.058558559 | 0.095454545 | 0.157822 |
| rs1135688  | UNC13D         | C/T | 17q | C | 0.339285714 | 0.281818182 | 0.15791  |
| rs2400941  |                | C/G | 14q | G | 0.285714286 | 0.348214286 | 0.158073 |
| rs3877899  | SEPP1          | A/G | 05p | A | 0.283783784 | 0.222727273 | 0.15818  |
| rs10421285 | ZNF470         | C/G | 19q | C | 0.308035714 | 0.370535714 | 0.158271 |
| rs2281959  | DUSP27         | G/T | 01q | T | 0.337837838 | 0.276785714 | 0.158448 |
| rs2303580  | NEDD4          | C/T | 15q | C | 0.258928571 | 0.200892857 | 0.158662 |
| rs1968872  | TREML3         | C/T | 06p | T | 0.0625      | 0.099099099 | 0.158701 |
| rs1660838  |                | C/T | 11q | T | 0.26146789  | 0.205357143 | 0.158893 |
| rs882605   | MUC4           | G/T | 03q | T | 0.137254902 | 0.093137255 | 0.158956 |
| rs2179634  | CD34           | A/G | 01q | A | 0.34375     | 0.279816514 | 0.159055 |
| rs2711941  | KLHL5          | G/T | 04p | T | 0.276785714 | 0.21875     | 0.159103 |
| rs6464008  |                | C/T | 07p | C | 0.325892857 | 0.263392857 | 0.159264 |
| rs745894   | CCDC102B       | A/C | 18q | A | 0.183035714 | 0.133928571 | 0.15933  |
| rs7095325  | MKI67          | A/T | 10q | T | 0.234042553 | 0.306818182 | 0.159342 |
| rs6580742  | LOC643275      | C/T | 12q | T | 0.142857143 | 0.193693694 | 0.159686 |
| rs6949353  |                | A/G | 07p | A | 0.333333333 | 0.263636364 | 0.159739 |
| rs1077126  | OR52B6         | A/G | 11p | G | 0.390909091 | 0.324324324 | 0.159788 |
| rs4972156  |                | A/T | 02p | A | 0.084821429 | 0.05        | 0.159795 |
| rs3731834  | ZNF804A        | C/G | 02q | C | 0.195454545 | 0.147321429 | 0.160248 |
| rs3212298  | PODXL          | A/G | 07q | A | 0.053571429 | 0.026785714 | 0.160395 |
| rs2070132  | ZNF146         | A/G | 19q | A | 0.425925926 | 0.36036036  | 0.160569 |
| rs6650971  | FAT2           | C/T | 05q | C | 0.27027027  | 0.333333333 | 0.160694 |
| rs3825723  | PLEKHH1        | A/T | 14q | T | 0.165178571 | 0.116071429 | 0.160813 |
| rs2281726  | TSR1           | A/G | 17p | G | 0.090909091 | 0.133928571 | 0.160996 |
| rs168107   | CLCC1          | G/T | 01p | T | 0.322115385 | 0.262886598 | 0.161098 |
| rs930557   | MCPH1          | C/G | 08p | G | 0.245535714 | 0.189189189 | 0.16115  |
| rs4274188  | MRGPRX3        | A/G | 11p | A | 0.28125     | 0.225225225 | 0.16132  |
| rs11125895 | FLJ13305       | C/T | 02p | C | 0.165178571 | 0.21875     | 0.161431 |
| rs7926767  | OR8D4          | A/G | 11q | G | 0.348214286 | 0.290178571 | 0.161566 |
| rs6761276  | IL1F10         | C/T | 02q | T | 0.325892857 | 0.388392857 | 0.161819 |
| rs958912   | ATP10B         | C/T | 05q | T | 0.189189189 | 0.140909091 | 0.161869 |
| rs12537531 | DNAH11         | C/T | 07p | T | 0.495495496 | 0.427927928 | 0.161921 |
| rs11845640 | AKAP6          | C/T | 14q | T | 0.071428571 | 0.107142857 | 0.161961 |
| rs2303067  | SPINK5         | A/G | 05q | A | 0.491071429 | 0.427927928 | 0.162244 |
| rs3745249  | KRI1           | A/G | 19p | G | 0.473214286 | 0.464285714 | 0.162793 |

|            |                     |     |     |   |             |             |          |
|------------|---------------------|-----|-----|---|-------------|-------------|----------|
| rs2407498  |                     | C/G | 12q | C | 0.214285714 | 0.160714286 | 0.162965 |
| rs6495228  | RYR3                | A/G | 15q | G | 0.174107143 | 0.127272727 | 0.162995 |
| rs2305355  | VWA3B               | A/G | 02q | A | 0.098214286 | 0.0625      | 0.163006 |
| rs2808770  | COL27A1             | C/T | 09q | C | 0.25        | 0.308035714 | 0.163027 |
| rs11228763 | OR9G4               | A/G | 11q | G | 0.120535714 | 0.081081081 | 0.163033 |
| rs3820071  | ELA2B               | A/G | 01p | A | 0.279279279 | 0.220183486 | 0.163336 |
| rs11077969 | CCDC57              | A/G | 17q | A | 0.477477477 | 0.40990991  | 0.163777 |
| rs11947663 |                     | C/G | 04p | G | 0.060185185 | 0.104761905 | 0.164105 |
| rs1512027  |                     | C/T | 12q | C | 0.058558559 | 0.03125     | 0.164156 |
| rs31853    | PCDHB2              | A/G | 05q | A | 0.071428571 | 0.041284404 | 0.164312 |
| rs6488956  |                     | C/T | 12q | T | 0.191964286 | 0.245535714 | 0.164723 |
| rs11636318 | TMC3                | C/T | 15q | C | 0.205357143 | 0.263392857 | 0.16479  |
| rs6711382  | NEB                 | A/G | 02q | A | 0.09375     | 0.133928571 | 0.164977 |
| rs3732407  | GOLGB1              | C/G | 03q | C | 0.223214286 | 0.28125     | 0.165169 |
| rs1534443  | UTRN                | C/T | 06q | C | 0.252252252 | 0.2         | 0.16537  |
| rs2278022  | ASCIZ               | C/T | 16q | C | 0.107142857 | 0.066964286 | 0.165502 |
| rs2170132  | C10orf64            | C/T | 10q | C | 0.245535714 | 0.303571429 | 0.165756 |
| rs592644   | PGM2L1              | C/T | 11q | C | 0.339622641 | 0.404545454 | 0.165759 |
| rs4820682  | CTB-1048E9.5        | A/G | 22q | G | 0.116071429 | 0.162162162 | 0.166019 |
| rs4361282  | FRMD4B              | C/G | 03p | G | 0.183035714 | 0.236607143 | 0.166164 |
| rs10216409 | LOC442388           | C/G | 08q | G | 0.324324324 | 0.26146789  | 0.166449 |
| rs11953029 | NY-REN-7, LOC653314 | A/G | 05q | A | 0.440909091 | 0.495535714 | 0.166549 |
| rs6599079  | OXSRI               | C/T | 03p | T | 0.142857143 | 0.102678571 | 0.166635 |
| rs2297518  | NOS2A               | A/G | 17q | A | 0.209821429 | 0.263392857 | 0.166639 |
| rs7215209  | NLE1                | C/T | 17q | C | 0.276699029 | 0.33490566  | 0.166758 |
| rs310831   | E2F7                | A/T | 12q | T | 0.15625     | 0.111607143 | 0.167125 |
| rs3847680  | OVCH1               | A/G | 12p | A | 0.415178571 | 0.477678571 | 0.16715  |
| rs536435   |                     | C/T | 03q | C | 0.392857143 | 0.455357143 | 0.167174 |
| rs2240026  | PPP1R9A             | A/G | 07q | A | 0.071428571 | 0.040178571 | 0.167263 |
| rs2274924  | TRPM6               | A/G | 09q | G | 0.107142857 | 0.066964286 | 0.167503 |
| rs3800291  | FLJ38717            | C/T | 06p | C | 0.401785714 | 0.342342342 | 0.168047 |
| rs2298711  | LMAN1               | A/T | 18q | T | 0.191964286 | 0.142857143 | 0.168231 |
| rs10883841 | NT5C2               | C/T | 10q | C | 0.160714286 | 0.117117117 | 0.168406 |
| rs2028574  | CCDC50              | A/T | 03q | A | 0.361607143 | 0.428571429 | 0.168442 |
| rs10761725 | JMJD1C              | A/T | 10q | A | 0.227678571 | 0.174107143 | 0.168522 |
| rs2615542  | CENPE               | A/G | 04q | G | 0.175675676 | 0.225225225 | 0.168664 |
| rs7209474  | CCDC57              | C/T | 17q | T | 0.473214286 | 0.40625     | 0.168849 |



|            |           |     |     |   |             |             |          |
|------------|-----------|-----|-----|---|-------------|-------------|----------|
| rs6977217  |           | A/G | 07p | A | 0.299107143 | 0.238738739 | 0.168869 |
| rs4253211  | ERCC6     | C/G | 10q | C | 0.09        | 0.126213592 | 0.168897 |
| rs9352     | CHAF1A    | C/T | 19p | T | 0.433035714 | 0.5         | 0.169198 |
| rs7699006  | HERC5     | A/G | 04q | G | 0.328828829 | 0.394495413 | 0.169214 |
| rs2230767  | SYNJ1     | C/T | 21q | T | 0.106796117 | 0.069444444 | 0.169216 |
| rs4779816  | TRPM1     | A/G | 15q | A | 0.193693694 | 0.245535714 | 0.169272 |
| rs1801695  | APOB      | A/G | 02p | A | 0.063063063 | 0.031818182 | 0.169298 |
| rs956749   | TAF2      | C/T | 08q | T | 0.09375     | 0.058035714 | 0.169457 |
| rs10009841 |           | A/G | 04p | G | 0.085585586 | 0.053571429 | 0.169569 |
| rs10493753 | SPATA1    | C/G | 01p | G | 0.058035714 | 0.03125     | 0.169661 |
| rs483192   |           | A/G | 06p | G | 0.183035714 | 0.135135135 | 0.169994 |
| rs6089941  |           | A/G | 20q | A | 0.066964286 | 0.102678571 | 0.169995 |
| rs3812153  | ELOVL4    | A/G | 06q | G | 0.145454546 | 0.104545455 | 0.170293 |
| rs2230491  | AKAP5     | C/T | 14q | T | 0.133928571 | 0.184684685 | 0.170334 |
| rs2073152  | OR12D2    | C/G | 06p | C | 0.274774775 | 0.222222222 | 0.170452 |
| rs7794606  |           | A/T | 07p | A | 0.328828829 | 0.267857143 | 0.170549 |
| rs10900400 |           | A/G | 01q | G | 0.189814815 | 0.240566038 | 0.170669 |
| rs1434579  | ZNF229    | A/G | 19q | A | 0.370535714 | 0.308035714 | 0.170669 |
| rs2312355  |           | A/G | 07q | A | 0.267857143 | 0.330357143 | 0.170729 |
| rs486055   | MMP10     | C/T | 11q | T | 0.171171171 | 0.125       | 0.170789 |
| rs893188   | ZNF324B   | A/G | 19q | A | 0.304545454 | 0.245535714 | 0.170899 |
| rs2304681  | KHK       | A/G | 02p | A | 0.369369369 | 0.433035714 | 0.171165 |
| rs203877   | ZNF165    | C/T | 06p | C | 0.236607143 | 0.294642857 | 0.171406 |
| rs2228956  | ASTN1     | A/G | 01q | A | 0.118181818 | 0.162162162 | 0.171728 |
| rs153477   | GM2A      | A/G | 05q | A | 0.369369369 | 0.435779816 | 0.173079 |
| rs759496   |           | C/G | 17q | C | 0.325892857 | 0.263636364 | 0.17315  |
| rs7103557  | OR4A47    | A/C | 11p | A | 0.355855856 | 0.419642857 | 0.173298 |
| rs1047955  | FLJ37644  | A/T | 17q | T | 0.303571429 | 0.245535714 | 0.17371  |
| rs10839601 | GVIN1     | A/G | 11p | A | 0.162162162 | 0.213636364 | 0.174057 |
| rs4242182  | MSX2      | C/T | 05q | T | 0.089285714 | 0.134259259 | 0.174203 |
| rs7342883  | EVPL      | A/G | 17q | A | 0.084821429 | 0.054054054 | 0.174294 |
| rs1154232  | LAMA3     | A/C | 18q | A | 0.241071429 | 0.1875      | 0.174301 |
| rs7601771  | PLB1      | C/G | 02p | G | 0.450892857 | 0.486607143 | 0.175223 |
| rs2276749  | VGLL4     | C/T | 03p | T | 0.0625      | 0.035714286 | 0.175314 |
| rs10037067 | GPR98     | A/G | 05q | G | 0.3         | 0.36407767  | 0.175415 |
| rs6463382  | tcag7.956 | A/C | 07p | A | 0.072072072 | 0.04245283  | 0.175429 |
| rs3749433  |           | C/T | 01p | C | 0.241071429 | 0.299107143 | 0.17557  |

|            |                     |     |     |   |             |             |          |
|------------|---------------------|-----|-----|---|-------------|-------------|----------|
| rs4910604  |                     | C/T | 11p | T | 0.245535714 | 0.303571429 | 0.175621 |
| rs745142   | C17orf80            | C/G | 17q | C | 0.46875     | 0.40625     | 0.176216 |
| rs2232016  | PRMT6               | C/T | 01p | T | 0.169724771 | 0.217592593 | 0.176224 |
| rs3194051  | IL7R                | A/G | 05p | G | 0.25        | 0.306306306 | 0.176329 |
| rs1065489  | CFH                 | G/T | 01q | T | 0.211711712 | 0.160714286 | 0.17643  |
| rs5996635  | LOC284890           | C/T | 22q | C | 0.1875      | 0.236607143 | 0.176552 |
| rs10891692 | FAM55A              | C/T | 11q | T | 0.4         | 0.333333333 | 0.176874 |
| rs7641243  | C3orf31             | C/T | 03p | C | 0.142857143 | 0.102678571 | 0.176936 |
| rs805708   | COL17A1             | A/G | 10q | G | 0.279279279 | 0.339285714 | 0.177031 |
| rs10204137 | IL1RL1              | A/G | 02q | G | 0.392857143 | 0.328828829 | 0.177033 |
| rs6587422  |                     | G/T | 01q | T | 0.080357143 | 0.049107143 | 0.177063 |
| rs568419   |                     | A/G | 01p | G | 0.477678571 | 0.418181818 | 0.177187 |
| rs557806   | PPP1R15A            | C/G | 19q | G | 0.157657658 | 0.207207207 | 0.177379 |
| rs3935608  |                     | A/G | 01q | G | 0.240909091 | 0.294642857 | 0.177532 |
| rs2288904  | SLC44A2             | C/T | 19p | T | 0.202702703 | 0.256756757 | 0.177653 |
| rs1007298  | Rgr                 | C/T | 22q | T | 0.328828829 | 0.272321429 | 0.177701 |
| rs4561518  | KIF2B               | C/T | 17q | C | 0.135135135 | 0.18018018  | 0.177794 |
| rs1939927  | PMP22CD             | C/T | 11q | T | 0.175675676 | 0.129464286 | 0.177795 |
| rs1065177  | RIF1                | C/G | 02q | C | 0.3125      | 0.254464286 | 0.178066 |
| rs2290808  | LOC441722           | G/T | 15q | G | 0.321428571 | 0.263636364 | 0.178123 |
| rs589292   | C9orf126            | C/T | 09q | T | 0.241071429 | 0.299107143 | 0.178171 |
| rs1048101  | ADRA1A              | C/T | 08p | C | 0.401785714 | 0.46728972  | 0.178264 |
| rs2638864  | MUC19               | C/T | 12q | C | 0.495535714 | 0.4375      | 0.178571 |
| rs2588401  | MUC19               | A/G | 12q | G | 0.495535714 | 0.4375      | 0.178571 |
| rs2638865  | MUC19               | A/G | 12q | G | 0.495535714 | 0.4375      | 0.178571 |
| rs2638875  | MUC19               | A/C | 12q | C | 0.495535714 | 0.4375      | 0.178571 |
| rs3732083  | GPR1                | A/G | 02q | G | 0.433035714 | 0.495535714 | 0.178711 |
| rs4715630  | DST                 | C/T | 06p | C | 0.243119266 | 0.300925926 | 0.178726 |
| rs9362415  | ZNF292              | A/G | 06q | A | 0.468468469 | 0.46875     | 0.178977 |
| rs9869     | DAPL1               | A/G | 02q | G | 0.424107143 | 0.486607143 | 0.179172 |
| rs3829765  | C14orf37            | A/G | 14q | G | 0.475961538 | 0.461904762 | 0.179321 |
| rs2285744  | THSD7A              | C/G | 07p | C | 0.463963964 | 0.399082569 | 0.179507 |
| rs8023214  |                     | C/T | 14q | T | 0.342342342 | 0.401785714 | 0.179556 |
| rs1156525  | ZNF214              | A/T | 11p | A | 0.343434343 | 0.405555556 | 0.179668 |
| rs2001490  | NAT8B               | C/G | 02p | C | 0.424107143 | 0.366071429 | 0.179826 |
| rs2278662  | RASGEF1C, LOC729618 | A/G | 05q | A | 0.25        | 0.198198198 | 0.179974 |
| rs4753069  | FAT3                | A/G | 11q | A | 0.15625     | 0.207207207 | 0.180068 |

|            |                   |     |     |   |             |             |          |
|------------|-------------------|-----|-----|---|-------------|-------------|----------|
| rs4436524  | OR52L1            | A/G | 11p | A | 0.200892857 | 0.254464286 | 0.18014  |
| rs3766160  | ELA2B             | A/G | 01p | A | 0.274774775 | 0.21875     | 0.180213 |
| rs3173833  | TMEM176B          | A/C | 07q | A | 0.463302752 | 0.397321429 | 0.18024  |
| rs9872691  | SLC9A10           | C/T | 03q | C | 0.274774775 | 0.220720721 | 0.180268 |
| rs3748085  | ANKRD6            | C/T | 06q | T | 0.109090909 | 0.15        | 0.180315 |
| rs2588411  | MUC19, LOC647546  | A/G | 12q | G | 0.495535714 | 0.436936937 | 0.18041  |
| rs427461   | ZNF780A           | C/G | 19q | G | 0.129464286 | 0.174107143 | 0.180499 |
| rs9257694  | OR5U1             | C/T | 06p | C | 0.45945946  | 0.477272727 | 0.180992 |
| rs4145748  | ITGA1             | C/T | 05q | T | 0.080357143 | 0.049107143 | 0.181004 |
| rs492594   | G6PC2             | C/G | 02q | G | 0.40625     | 0.473214286 | 0.181006 |
| rs2073342  | RNASE3            | C/G | 14q | C | 0.254464286 | 0.309090909 | 0.18107  |
| rs10761073 | OR13D1            | C/T | 09q | C | 0.482142857 | 0.419642857 | 0.181076 |
| rs1056836  | CYP1B1            | C/G | 02p | G | 0.391891892 | 0.454954955 | 0.181179 |
| rs4358188  | BPI               | A/G | 20q | G | 0.444954128 | 0.485981308 | 0.181358 |
| rs1000411  |                   | C/T | 20q | T | 0.191964286 | 0.142857143 | 0.181391 |
| rs410029   | LOC729474         | C/T | 19q | T | 0.1         | 0.063063063 | 0.181485 |
| rs956748   | TAF2              | C/T | 08q | C | 0.102678571 | 0.066964286 | 0.181501 |
| rs182844   |                   | C/T | 05q | C | 0.308035714 | 0.25        | 0.181566 |
| rs11665978 | ZNF85             | C/G | 19p | C | 0.183035714 | 0.138392857 | 0.181629 |
| rs7030820  | OR13F1            | C/T | 09q | C | 0.463963964 | 0.401785714 | 0.181692 |
| rs3783185  | CLYBL             | C/T | 13q | T | 0.209821429 | 0.263636364 | 0.181719 |
| rs10163657 | LOXHD1, LOC647011 | C/T | 18q | T | 0.084821429 | 0.053571429 | 0.181756 |
| rs714181   | BTBD12            | C/T | 16p | T | 0.058035714 | 0.09009009  | 0.181947 |
| rs2664538  |                   | A/G | 20q | G | 0.348214286 | 0.40625     | 0.182229 |
| rs3812138  | NT5E              | C/T | 06q | T | 0.308035714 | 0.25        | 0.182232 |
| rs2764657  | LOC729708         | A/C | 01p | C | 0.100917431 | 0.066964286 | 0.182246 |
| rs1058219  | MYO5A             | C/T | 15q | T | 0.223214286 | 0.174107143 | 0.182541 |
| rs1051447  | FLJ21511          | A/C | 04p | C | 0.247747748 | 0.303571429 | 0.182542 |
| rs3176441  | FAM5B             | C/T | 01q | C | 0.252336449 | 0.306603774 | 0.182575 |
| rs1044280  | KIDINS220         | G/T | 02p | T | 0.196428571 | 0.25        | 0.182743 |
| rs7903344  |                   | C/T | 10q | C | 0.481981982 | 0.45412844  | 0.182781 |
| rs4371530  | NAALADL2          | C/T | 03q | T | 0.236607143 | 0.290178571 | 0.182786 |
| rs8337     | UBD               | C/G | 06p | G | 0.28125     | 0.22972973  | 0.183003 |
| rs7247102  |                   | A/G | 19p | G | 0.278301887 | 0.219387755 | 0.18306  |
| rs1063535  | MKI67             | C/T | 10q | C | 0.469072165 | 0.457831325 | 0.183107 |
| rs6780995  | IL17RD            | A/G | 03p | G | 0.315533981 | 0.257009346 | 0.183308 |
| rs587404   | MACF1             | A/G | 01p | A | 0.247747748 | 0.303571429 | 0.183498 |

|            |          |     |     |   |             |             |          |
|------------|----------|-----|-----|---|-------------|-------------|----------|
| rs1065674  | NUP133   | A/G | 01q | G | 0.22972973  | 0.18018018  | 0.183517 |
| rs7756884  |          | A/G | 06q | A | 0.288461538 | 0.228571429 | 0.183717 |
| rs3804506  | EFHC1    | A/G | 06p | A | 0.136363636 | 0.095454545 | 0.183841 |
| rs3759871  | SPG11    | A/G | 15q | G | 0.432432432 | 0.495535714 | 0.1839   |
| rs2736531  | OR51M1   | A/C | 11p | C | 0.37037037  | 0.310679612 | 0.184201 |
| rs7140044  | PARP4    | C/T | 13q | T | 0.218181818 | 0.174107143 | 0.184231 |
| rs1715919  | MNS1     | G/T | 15q | G | 0.117117117 | 0.081818182 | 0.184258 |
| rs2270927  | SV2C     | C/G | 05q | C | 0.089285714 | 0.129464286 | 0.184287 |
| rs235768   | BMP2     | A/T | 20p | A | 0.379464286 | 0.316964286 | 0.184375 |
| rs4283998  |          | A/G | 07p | A | 0.118181818 | 0.16        | 0.184463 |
| rs2638863  | MUC19    | A/C | 12q | C | 0.495535714 | 0.436936937 | 0.184563 |
| rs2287631  | MDH1B    | A/C | 02q | C | 0.089285714 | 0.054054054 | 0.184912 |
| rs1550116  | CENPO    | A/G | 02p | G | 0.111607143 | 0.151785714 | 0.184927 |
| rs2442455  | IFT88    | C/T | 13q | T | 0.116071429 | 0.15625     | 0.18494  |
| rs281608   |          | A/G | 16p | A | 0.063829787 | 0.102272727 | 0.184956 |
| rs6597293  | TXNDC5   | C/G | 06p | C | 0.28125     | 0.339285714 | 0.184985 |
| rs11783478 | RP1L1    | C/T | 08p | T | 0.491071429 | 0.445945946 | 0.185492 |
| rs2588402  | MUC19    | A/G | 12q | G | 0.495495495 | 0.4375      | 0.185572 |
| rs11710339 | KIF15    | A/T | 03p | T | 0.232142857 | 0.185185185 | 0.185629 |
| rs3989369  | MRPL39   | A/G | 21q | A | 0.054054054 | 0.086363636 | 0.185744 |
| rs920829   | TRPA1    | A/G | 08q | A | 0.075892857 | 0.113636364 | 0.185837 |
| rs6661946  | HEATR1   | C/T | 01q | T | 0.059090909 | 0.031531532 | 0.186046 |
| rs1044856  | EPSTI1   | A/T | 13q | A | 0.34375     | 0.409090909 | 0.186176 |
| rs1465789  | ZNF132   | C/T | 19q | T | 0.468468468 | 0.46875     | 0.186275 |
| rs2281891  | CYP2C18  | A/G | 10q | A | 0.189189189 | 0.142857143 | 0.186327 |
| rs8170     | C19orf62 | C/T | 19p | T | 0.220720721 | 0.171171171 | 0.186498 |
| rs4767884  | PXN      | C/T | 12q | T | 0.263392857 | 0.209821429 | 0.186521 |
| rs2015157  |          | G/T | 19p | G | 0.066964286 | 0.102678571 | 0.186552 |
| rs2797491  | C10orf18 | C/G | 10p | G | 0.162162162 | 0.211711712 | 0.186556 |
| rs10411037 |          | A/G | 19q | A | 0.214285714 | 0.160714286 | 0.186585 |
| rs4349946  | TUBB     | C/T | 08p | T | 0.236607143 | 0.28125     | 0.186673 |
| rs2305816  | SVOPL    | A/C | 07q | A | 0.282407407 | 0.342857143 | 0.186768 |
| rs2165627  | PTPRB    | G/T | 12q | G | 0.171171171 | 0.125       | 0.18682  |
| rs216311   | VWF      | A/G | 12p | A | 0.313636364 | 0.375       | 0.186894 |
| rs3791983  |          | C/G | 02p | C | 0.098214286 | 0.13963964  | 0.186996 |
| rs3742809  | C14orf45 | C/T | 14q | C | 0.148648649 | 0.198198198 | 0.187016 |
| rs1886997  | MPHOSPH1 | A/G | 10q | G | 0.256756757 | 0.205357143 | 0.187142 |

|            |                     |     |     |   |             |             |          |
|------------|---------------------|-----|-----|---|-------------|-------------|----------|
| rs2961161  | OR2A14              | C/G | 07q | C | 0.472972973 | 0.464285714 | 0.187246 |
| rs10484847 | DNAH8               | C/T | 06p | C | 0.243243243 | 0.193693694 | 0.187323 |
| rs3178794  | FLJ21062            | C/T | 07q | T | 0.4375      | 0.5         | 0.187502 |
| rs584367   | PLA2G2D             | C/T | 01p | T | 0.348214286 | 0.410714286 | 0.187624 |
| rs2184884  | C1orf88             | G/T | 01p | T | 0.169642857 | 0.126126126 | 0.18805  |
| rs4761943  |                     | C/T | 12q | T | 0.201834862 | 0.151960784 | 0.18808  |
| rs11120616 | USH2A               | A/G | 01q | A | 0.225225225 | 0.178571429 | 0.188101 |
| rs956868   | WNK1                | A/C | 12p | A | 0.162162162 | 0.209821429 | 0.188266 |
| rs10763815 |                     | C/G | 10p | G | 0.323809524 | 0.271428571 | 0.188325 |
| rs2703752  |                     | A/C | 11q | A | 0.383928571 | 0.446428571 | 0.188412 |
| rs7974557  |                     | A/C | 12q | A | 0.258928571 | 0.315315315 | 0.188439 |
| rs1174658  | RGL1, APOBEC4       | A/G | 01q | G | 0.392857143 | 0.330357143 | 0.188513 |
| rs3796544  | AASDH               | C/T | 04q | T | 0.383928571 | 0.446428571 | 0.188575 |
| rs1058768  | TINAG               | C/T | 06p | T | 0.382882883 | 0.322727273 | 0.188781 |
| rs241778   | FLJ40504, LOC729594 | A/T | 17q | A | 0.072072072 | 0.107142857 | 0.189203 |
| rs164075   | PCDH12              | A/C | 05q | A | 0.482142857 | 0.454954955 | 0.18922  |
| rs2013335  | KRT78               | A/G | 12q | A | 0.40625     | 0.46875     | 0.189375 |
| rs546502   | PPFIA1              | A/G | 11q | A | 0.290909091 | 0.234234234 | 0.189384 |
| rs2655655  | LCA5                | C/T | 06q | T | 0.196261682 | 0.247663551 | 0.189417 |
| rs7807731  |                     | C/T | 07q | C | 0.464285714 | 0.401785714 | 0.189472 |
| rs12139511 | MYSM1               | C/T | 01p | T | 0.433035714 | 0.375       | 0.189747 |
| rs4732620  | C8orf80             | C/T | 08p | T | 0.405405405 | 0.464285714 | 0.189803 |
| rs1909261  |                     | C/T | 11p | T | 0.151785714 | 0.111607143 | 0.190399 |
| rs3741822  | GPRC5D              | A/C | 12p | A | 0.053571429 | 0.085585586 | 0.190461 |
| rs1791351  |                     | C/G | 18q | G | 0.309090909 | 0.254464286 | 0.190725 |
| rs11084161 | ZNF534              | A/C | 19q | C | 0.067567568 | 0.040178571 | 0.19107  |
| rs2000813  | LIPG                | C/T | 18q | T | 0.257142857 | 0.319444444 | 0.191078 |
| rs9356630  |                     | C/T | 06q | T | 0.063636364 | 0.031818182 | 0.191334 |
| rs3740199  | ADAM12              | C/G | 10q | C | 0.495535714 | 0.436936937 | 0.191495 |
| rs584144   |                     | C/T | 11q | T | 0.324324324 | 0.267857143 | 0.191526 |
| rs829864   |                     | C/T | 12q | C | 0.482142857 | 0.419642857 | 0.191729 |
| rs9640663  | PTPN12              | A/G | 07q | G | 0.363636364 | 0.423423423 | 0.191761 |
| rs10446759 |                     | C/T | 04q | C | 0.415178571 | 0.477272727 | 0.19177  |
| rs6464465  | LOC93432            | C/G | 07q | G | 0.321428571 | 0.381818182 | 0.191777 |
| rs2070745  | FPR1                | C/G | 19q | C | 0.372727273 | 0.436363636 | 0.191821 |
| rs1329957  | OR1Q1               | C/T | 09q | T | 0.075892857 | 0.111607143 | 0.191936 |
| rs2524383  | EMR2                | C/G | 19p | C | 0.267857143 | 0.225225225 | 0.192022 |

|            |                     |     |     |   |             |             |          |
|------------|---------------------|-----|-----|---|-------------|-------------|----------|
| rs7165988  | FLJ35695            | C/G | 15q | G | 0.299107143 | 0.245535714 | 0.19208  |
| rs11638297 |                     | A/C | 15q | C | 0.318181818 | 0.261261261 | 0.192115 |
| rs4677728  | CCDC50              | A/G | 03q | G | 0.364864865 | 0.428571429 | 0.192209 |
| rs6426616  | PLA2G2C             | C/T | 01p | T | 0.369369369 | 0.434579439 | 0.192995 |
| rs2305479  | GSDML               | A/G | 17q | A | 0.458715596 | 0.481651376 | 0.193014 |
| rs238388   | SLC35F4             | A/C | 14q | C | 0.357843137 | 0.430107527 | 0.193019 |
| rs10793975 |                     | A/G | 09q | G | 0.214285714 | 0.267857143 | 0.193259 |
| rs1048328  | KLK11               | C/T | 19q | T | 0.089285714 | 0.058035714 | 0.19333  |
| rs12592644 |                     | C/T | 15q | C | 0.129807692 | 0.17961165  | 0.193597 |
| rs2296303  | LAMC2               | C/G | 01q | G | 0.165178571 | 0.121621622 | 0.193598 |
| rs2295879  | TACC2               | A/G | 10q | A | 0.328828829 | 0.27027027  | 0.193894 |
| rs3849746  |                     | A/T | 05q | A | 0.321428571 | 0.379464286 | 0.194012 |
| rs383362   | LOC729251           | G/T | 16q | G | 0.436936937 | 0.495535714 | 0.194114 |
| rs3811633  | MERTK               | A/G | 02q | A | 0.330357143 | 0.267857143 | 0.19413  |
| rs3134295  | WDSOF1, SLC25A32    | A/C | 08q | C | 0.433035714 | 0.495495496 | 0.194154 |
| rs2791494  | CLCA1               | A/G | 01p | A | 0.196428571 | 0.151785714 | 0.194163 |
| rs2057413  | SETDB2              | A/G | 13q | G | 0.269230769 | 0.331730769 | 0.194371 |
| rs1891460  | FLJ32569, LOC651713 | A/G | 01q | A | 0.061320755 | 0.102941176 | 0.194575 |
| rs10828317 | PIP4K2A             | C/T | 10p | C | 0.310810811 | 0.256756757 | 0.194824 |
| rs662515   | MPPE1               | C/G | 18p | G | 0.27027027  | 0.327272727 | 0.194845 |
| rs2232918  | ZBED5               | C/T | 11p | T | 0.089285714 | 0.058035714 | 0.194942 |
| rs11730882 |                     | A/G | 04q | A | 0.45045045  | 0.391891892 | 0.195143 |
| rs311685   | DDX43               | C/T | 06q | T | 0.424107143 | 0.486607143 | 0.195161 |
| rs311686   | DDX43               | C/T | 06q | T | 0.424107143 | 0.486607143 | 0.195161 |
| rs7924390  |                     | A/C | 11p | A | 0.321428571 | 0.263392857 | 0.195302 |
| rs6578563  |                     | A/T | 11p | T | 0.321428571 | 0.263392857 | 0.195302 |
| rs548150   |                     | A/G | 11q | G | 0.342342342 | 0.403669725 | 0.195469 |
| rs2242653  | C6orf21             | C/T | 06p | T | 0.116071429 | 0.15625     | 0.195541 |
| rs3737242  | C9orf24             | A/G | 09p | A | 0.234234234 | 0.1875      | 0.195705 |
| rs1974777  | GEMIN5              | A/G | 05q | G | 0.138392857 | 0.098214286 | 0.196202 |
| rs2304027  |                     | A/G | 05q | A | 0.446428571 | 0.491071429 | 0.196319 |
| rs3009004  |                     | C/G | 03p | G | 0.30733945  | 0.263888889 | 0.196324 |
| rs6507992  | C18orf24            | A/G | 18q | G | 0.378378378 | 0.441441441 | 0.196389 |
| rs1366258  | ZNF534              | A/C | 19q | A | 0.050458716 | 0.027027027 | 0.19639  |
| rs298109   | KRT75               | A/G | 12q | A | 0.357142857 | 0.415178571 | 0.196494 |
| rs11161812 |                     | A/G | 01p | A | 0.303571429 | 0.36036036  | 0.196751 |
| rs5361     | SELE                | A/C | 01q | C | 0.09375     | 0.133928571 | 0.196871 |

|            |                  |     |     |   |             |             |          |
|------------|------------------|-----|-----|---|-------------|-------------|----------|
| rs11084162 | ZNF534           | A/G | 19q | A | 0.066964286 | 0.040178571 | 0.197192 |
| rs1881421  | ALK              | C/G | 02p | G | 0.382882883 | 0.327272727 | 0.197307 |
| rs2341432  | OR52B6           | A/T | 11p | A | 0.486607143 | 0.450892857 | 0.197309 |
| rs9658625  | SOAT2            | A/G | 12q | G | 0.054545455 | 0.084821429 | 0.197513 |
| rs7133666  | PIK3C2G          | A/C | 12p | A | 0.085585586 | 0.054545454 | 0.19753  |
| rs3429     | IFT74            | A/G | 09p | A | 0.142857143 | 0.103603604 | 0.198086 |
| rs3737859  | LCE2B            | A/C | 01q | C | 0.081081081 | 0.117117117 | 0.198565 |
| rs2239359  | FANCA            | C/T | 16q | T | 0.351351351 | 0.410714286 | 0.19896  |
| rs3820059  | C1orf114         | A/G | 01q | A | 0.279279279 | 0.331818182 | 0.199    |
| rs1801376  | BUB1B            | A/G | 15q | G | 0.316964286 | 0.263392857 | 0.199203 |
| rs7373165  | LMLN             | G/T | 03q | T | 0.125       | 0.089285714 | 0.199344 |
| rs3805436  | MATR3            | A/C | 05q | C | 0.267857143 | 0.321428571 | 0.19939  |
| rs3826919  |                  | A/G | 19q | G | 0.094594595 | 0.133928571 | 0.199529 |
| rs2290610  | IL5RA            | A/G | 03p | G | 0.409090909 | 0.355855856 | 0.19962  |
| rs2243527  | LGALS8           | C/T | 01q | C | 0.26635514  | 0.319444444 | 0.199648 |
| rs8099021  | MYOM1            | C/G | 18p | C | 0.276785714 | 0.328703704 | 0.200002 |
| rs3745060  | ST8SIA3          | A/C | 18q | C | 0.169642857 | 0.126126126 | 0.200378 |
| rs7129085  | INCENP           | G/T | 11q | G | 0.375       | 0.315315315 | 0.200425 |
| rs976714   | PCLO             | C/T | 07q | T | 0.400900901 | 0.337837838 | 0.200431 |
| rs1045454  | BET1L            | C/T | 11p | T | 0.288288288 | 0.234234234 | 0.200588 |
| rs6768523  | SLC9A10          | C/T | 03q | C | 0.272321429 | 0.220720721 | 0.200781 |
| rs10083205 | MUC19, LOC730517 | A/G | 12q | G | 0.129464286 | 0.171171171 | 0.200817 |
| rs1211554  | EXOC2, HUS1B     | A/C | 06p | C | 0.086363636 | 0.125       | 0.200934 |
| rs7256487  |                  | C/T | 19p | T | 0.369369369 | 0.309090909 | 0.201153 |
| rs4714759  | TMEM63B          | A/G | 06p | A | 0.075892857 | 0.112612613 | 0.201241 |
| rs11548    | GPX3, TNIP1      | C/T | 05q | T | 0.053571429 | 0.084821429 | 0.20152  |
| rs762063   | GPR137C          | A/G | 14q | G | 0.481981982 | 0.45412844  | 0.201566 |
| rs150857   | CARKL            | C/T | 17p | T | 0.111607143 | 0.075892857 | 0.201712 |
| rs9383921  | RAET1E           | C/T | 06q | T | 0.392523365 | 0.45412844  | 0.20185  |
| rs2185724  | KIAA1462         | C/T | 10p | C | 0.424107143 | 0.364864865 | 0.202106 |
| rs957680   | GFM2             | A/G | 05q | G | 0.116071429 | 0.157657658 | 0.202238 |
| rs11568454 |                  | A/G | 17q | G | 0.36036036  | 0.304545455 | 0.20258  |
| rs1864312  | CRISP3           | A/C | 06p | A | 0.400900901 | 0.464285714 | 0.202741 |
| rs2086310  | ADAMTS16         | C/G | 05p | G | 0.168181818 | 0.214285714 | 0.203069 |
| rs2071888  | TAPBP            | C/G | 06p | C | 0.495535714 | 0.446428571 | 0.203233 |
| rs4084699  | LOC284288        | A/T | 18q | T | 0.068181818 | 0.101851852 | 0.203453 |
| rs3828855  | BYSL             | A/G | 06p | A | 0.09375     | 0.131818182 | 0.203685 |

|            |                  |     |     |   |             |             |          |
|------------|------------------|-----|-----|---|-------------|-------------|----------|
| rs12192461 |                  | A/G | 06q | A | 0.223214286 | 0.175675676 | 0.203739 |
| rs952825   |                  | A/T | 07q | A | 0.27027027  | 0.325892857 | 0.203873 |
| rs9972951  | ARSG             | A/G | 17q | A | 0.068627451 | 0.102941176 | 0.203879 |
| rs303061   | C6orf218         | A/G | 06p | G | 0.227678571 | 0.28125     | 0.203914 |
| rs276937   | DSC3             | A/T | 18q | A | 0.263392857 | 0.315315315 | 0.203977 |
| rs1970911  | CCDC88C          | A/G | 14q | A | 0.148648649 | 0.191964286 | 0.203983 |
| rs2227956  | HSPA1L           | C/T | 06p | C | 0.1875      | 0.142857143 | 0.204041 |
| rs848209   | SPEN             | C/T | 01p | T | 0.388392857 | 0.450892857 | 0.204227 |
| rs2486188  | PDPN             | C/G | 01p | G | 0.0625      | 0.036363636 | 0.20443  |
| rs3132453  | BAT2             | A/C | 06p | A | 0.086363636 | 0.058035714 | 0.204441 |
| rs3130267  | MYL8P, LOC642076 | G/T | 06p | T | 0.491071429 | 0.450892857 | 0.204452 |
| rs10191506 |                  | A/G | 02p | G | 0.445945946 | 0.491071429 | 0.20446  |
| rs712701   | PAX4             | A/C | 07q | A | 0.203703704 | 0.155963303 | 0.204494 |
| rs11192036 | C10orf80         | A/T | 10q | A | 0.267857143 | 0.21875     | 0.204517 |
| rs2001821  | RNPEPL1          | C/T | 02q | T | 0.339285714 | 0.28125     | 0.204583 |
| rs3732410  | GOLGB1           | A/G | 03q | G | 0.227678571 | 0.28125     | 0.204621 |
| rs6679056  | OR10R2           | A/G | 01q | A | 0.486486486 | 0.428571429 | 0.204666 |
| rs2302340  | INMT             | A/G | 07p | G | 0.395454546 | 0.450892857 | 0.204925 |
| rs9809384  | SLC9A10          | C/T | 03q | T | 0.339285714 | 0.395454546 | 0.204964 |
| rs7718054  | FAT2             | C/T | 05q | T | 0.155660377 | 0.107843137 | 0.205107 |
| rs710174   |                  | A/G | 22q | A | 0.330275229 | 0.386363636 | 0.205182 |
| rs4567069  |                  | A/G | 08q | G | 0.357142857 | 0.409090909 | 0.205784 |
| rs2270915  | NPR3             | A/G | 05p | G | 0.212264151 | 0.16        | 0.205964 |
| rs12583104 | LOC643677        | A/G | 13q | G | 0.243243243 | 0.193693694 | 0.206096 |
| rs3136820  |                  | G/T | 14q | G | 0.433035714 | 0.491071429 | 0.206293 |
| rs198844   | HIST1H1T         | C/G | 06p | C | 0.424107143 | 0.481981982 | 0.206412 |
| rs3810206  | GTPBP3           | C/T | 19p | T | 0.222727273 | 0.276785714 | 0.206426 |
| rs11876055 |                  | C/T | 18q | T | 0.113636364 | 0.079439252 | 0.206472 |
| rs4494160  | CLCC1, FNDC7     | A/G | 01p | A | 0.348214286 | 0.290178571 | 0.206485 |
| rs2280084  | NUP210           | G/T | 03p | G | 0.427927928 | 0.369369369 | 0.206491 |
| rs11632637 | LOC644192        | C/G | 15q | G | 0.334821429 | 0.28125     | 0.206507 |
| rs1052325  | C4orf22          | A/G | 04q | G | 0.166666667 | 0.21559633  | 0.206618 |
| rs2505861  | CCNYL2           | C/T | 10q | C | 0.31981982  | 0.375       | 0.206695 |
| rs1800057  | ATM              | C/G | 11q | G | 0.074074074 | 0.04587156  | 0.206771 |
| rs37369    | AGXT2            | C/T | 05p | T | 0.084821429 | 0.053571429 | 0.206803 |
| rs2279371  |                  | C/T | 18q | T | 0.054054054 | 0.084821429 | 0.206879 |
| rs1469122  | C16orf61         | C/T | 16q | T | 0.285714286 | 0.232142857 | 0.20695  |



|            |                               |     |     |   |             |             |          |
|------------|-------------------------------|-----|-----|---|-------------|-------------|----------|
| rs2296968  | SOHLH2                        | C/T | 13q | T | 0.174528302 | 0.222772277 | 0.206991 |
| rs10843438 | OVCH1                         | A/G | 12p | A | 0.459821429 | 0.482142857 | 0.207428 |
| rs1714987  | ACACA, C17orf78               | C/G | 17q | G | 0.178571429 | 0.227678571 | 0.207439 |
| rs1805002  | CCKBR                         | A/G | 11p | A | 0.058035714 | 0.09009009  | 0.207444 |
| rs2282537  | POU2F3                        | C/T | 11q | T | 0.174107143 | 0.133027523 | 0.20746  |
| rs2001078  |                               | C/T | 22q | T | 0.192660551 | 0.148648649 | 0.207504 |
| rs4728329  | AKR1B10                       | A/G | 07q | A | 0.072072072 | 0.103603604 | 0.207604 |
| rs1062465  | MPHOSPH1                      | A/T | 10q | A | 0.254464286 | 0.205357143 | 0.207851 |
| rs3749971  | OR12D3                        | C/T | 06p | T | 0.085       | 0.120879121 | 0.207863 |
| rs12573841 | DNAJC9                        | A/G | 10q | A | 0.066964286 | 0.040178571 | 0.207928 |
| rs745143   | C17orf80                      | A/G | 17q | A | 0.473214286 | 0.413636364 | 0.207957 |
| rs2455069  | CD33                          | A/G | 19q | G | 0.397321429 | 0.455357143 | 0.208073 |
| rs1026128  | COG1                          | A/G | 17q | A | 0.481981982 | 0.422018349 | 0.208488 |
| rs2286430  | DKFZp762E1312                 | A/G | 02q | A | 0.477678571 | 0.464285714 | 0.208578 |
| rs678892   | PIGB                          | G/T | 15q | T | 0.308035714 | 0.361607143 | 0.208605 |
| rs2304177  | C19orf33, YIF1B,<br>LOC541469 | A/G | 19q | A | 0.114678899 | 0.15625     | 0.208652 |
| rs484373   | FGL1                          | C/T | 08p | C | 0.254464286 | 0.205357143 | 0.208655 |
| rs3825801  | MYO5C                         | A/G | 15q | A | 0.071428571 | 0.107142857 | 0.208672 |
| rs2319850  | FLJ31033                      | C/T | 04q | T | 0.0625      | 0.035714286 | 0.208747 |
| rs7927539  |                               | C/T | 11p | T | 0.31981982  | 0.263392857 | 0.20876  |
| rs11896729 | UNC50                         | C/T | 02q | C | 0.293577982 | 0.241071429 | 0.208834 |
| rs9268384  | C6orf10                       | A/G | 06p | G | 0.436936937 | 0.379464286 | 0.209128 |
| rs9974333  | SH3BGR                        | C/T | 21q | T | 0.491071429 | 0.450892857 | 0.209338 |
| rs9548509  | FREM2                         | C/T | 13q | C | 0.316964286 | 0.267857143 | 0.209417 |
| rs1792395  |                               | A/G | 11q | A | 0.46875     | 0.473214286 | 0.209553 |
| rs650073   |                               | G/T | 05p | T | 0.068181818 | 0.103603604 | 0.209605 |
| rs1043307  | PSMD9                         | A/G | 12q | G | 0.261261261 | 0.316964286 | 0.209943 |
| rs12026290 | PHC2                          | C/T | 01p | T | 0.178571429 | 0.223214286 | 0.210024 |
| rs2282632  | ASXL3                         | C/T | 18q | T | 0.486363636 | 0.450450451 | 0.210048 |
| rs7193871  |                               | C/G | 16p | G | 0.327272727 | 0.388392857 | 0.210641 |
| rs2228529  | ERCC6                         | A/G | 10q | G | 0.25        | 0.2         | 0.210852 |
| rs1063479  | PLEK                          | A/G | 02p | G | 0.316037736 | 0.257575758 | 0.211146 |
| rs1805165  | EIF2AK3                       | G/T | 02p | G | 0.272321429 | 0.325892857 | 0.211149 |
| rs6934603  | GJB7                          | A/G | 06q | A | 0.473214286 | 0.468468468 | 0.211418 |
| rs3746405  | PPP4R1L                       | C/T | 20q | T | 0.450892857 | 0.388392857 | 0.211993 |
| rs9924530  | PKD1L2                        | A/G | 16q | A | 0.382882883 | 0.330357143 | 0.212422 |

|            |              |     |     |   |             |             |          |
|------------|--------------|-----|-----|---|-------------|-------------|----------|
| rs3024477  | F13A1        | A/T | 06p | T | 0.052380952 | 0.027272727 | 0.212575 |
| rs16885    | ATXN1        | C/T | 06p | T | 0.162162162 | 0.211711712 | 0.212741 |
| rs855314   | PGM1         | C/T | 01p | C | 0.175675676 | 0.130630631 | 0.21295  |
| rs4501959  | OR52L1       | C/T | 11p | T | 0.148648649 | 0.191964286 | 0.212974 |
| rs11088262 | ATP5O        | A/G | 21q | G | 0.114678899 | 0.078703704 | 0.213014 |
| rs3131085  | LOC646260    | A/G | 06p | A | 0.0625      | 0.09375     | 0.213109 |
| rs30489    | TCF7         | C/T | 05q | T | 0.102678571 | 0.071428571 | 0.213362 |
| rs11784192 |              | C/T | 08q | T | 0.183035714 | 0.138392857 | 0.213377 |
| rs9835485  | ZNF167       | A/G | 03p | G | 0.263392857 | 0.223214286 | 0.213385 |
| rs1812152  | FLJ40869     | A/T | 02p | T | 0.35046729  | 0.41        | 0.213505 |
| rs1801212  | WFS1         | A/G | 04p | G | 0.31981982  | 0.267857143 | 0.213582 |
| rs2657879  | GLS2         | C/T | 12q | C | 0.236607143 | 0.1875      | 0.213674 |
| rs11739983 |              | A/G | 05q | A | 0.205357143 | 0.254464286 | 0.213816 |
| rs2274907  | ITLN1        | A/T | 01q | A | 0.316964286 | 0.263392857 | 0.213868 |
| rs2288210  | NEB          | C/G | 02q | C | 0.373873874 | 0.31981982  | 0.214198 |
| rs930047   | CPLX2        | C/G | 05q | G | 0.463963964 | 0.401785714 | 0.214231 |
| rs236110   | MCM8         | G/T | 20p | T | 0.121621622 | 0.084821429 | 0.21431  |
| rs2177336  | MUC4         | C/T | 03q | T | 0.174107143 | 0.133928571 | 0.214351 |
| rs2076371  | SLC16A8      | A/G | 22q | A | 0.245454545 | 0.293577982 | 0.214474 |
| rs3741367  | CD248        | C/T | 11q | C | 0.477678571 | 0.419642857 | 0.214573 |
| rs10764749 | MKI67        | C/T | 10q | T | 0.272321429 | 0.330357143 | 0.214804 |
| rs2071496  | MKI67        | C/G | 10q | G | 0.272321429 | 0.330357143 | 0.214804 |
| rs1868024  | MOGAT1       | C/T | 02q | C | 0.209821429 | 0.263392857 | 0.214825 |
| rs262993   | YEATS2       | C/T | 03q | T | 0.452830189 | 0.393518519 | 0.215037 |
| rs2877     | PCLO         | C/G | 07q | C | 0.348214286 | 0.294642857 | 0.215364 |
| rs10513155 | DNAH5        | A/C | 05p | A | 0.308035714 | 0.258928571 | 0.215403 |
| rs550510   | CALCOCO2     | A/G | 17q | A | 0.147321429 | 0.108108108 | 0.215417 |
| rs1039808  |              | A/G | 04q | A | 0.397321429 | 0.455357143 | 0.215421 |
| rs904763   | AP1G1        | A/C | 16q | A | 0.232142857 | 0.184684685 | 0.215458 |
| rs2838012  | FAM3B        | A/G | 21q | A | 0.067307692 | 0.101851852 | 0.215471 |
| rs10839635 | OR10A4       | A/G | 11p | A | 0.21875     | 0.267857143 | 0.215531 |
| rs17563    | BMP4         | C/T | 14q | T | 0.459821429 | 0.486607143 | 0.215543 |
| rs2069556  | TG           | A/G | 08q | A | 0.414414414 | 0.357142857 | 0.216037 |
| rs1055577  | USH1C        | C/T | 11p | T | 0.473214286 | 0.46875     | 0.216272 |
| rs2278420  | ZNF350       | A/G | 19q | G | 0.1875      | 0.236607143 | 0.216978 |
| rs10951956 | FBXL18       | A/G | 07p | A | 0.142857143 | 0.107142857 | 0.217009 |
| rs11630197 | DKFZp666G057 | C/T | 15q | C | 0.294642857 | 0.243243243 | 0.217177 |

|            |                        |     |     |   |             |             |          |
|------------|------------------------|-----|-----|---|-------------|-------------|----------|
| rs2528693  | LAMB4                  | C/G | 07q | G | 0.072072072 | 0.045454546 | 0.217485 |
| rs2275824  | KIAA0562               | A/T | 01p | A | 0.414414414 | 0.46875     | 0.217598 |
| rs2282542  | CEP192                 | A/G | 18p | A | 0.157657658 | 0.116071429 | 0.217774 |
| rs2799163  |                        | A/G | 09p | G | 0.288288288 | 0.340909091 | 0.217866 |
| rs11607    | MBTPS1                 | A/G | 16q | A | 0.427927928 | 0.369369369 | 0.218059 |
| rs167437   | C14orf135              | C/T | 14q | T | 0.169642857 | 0.129464286 | 0.218168 |
| rs799193   | ZNF441                 | C/T | 19p | C | 0.258928571 | 0.209821429 | 0.218236 |
| rs9987240  |                        | C/T | 08p | T | 0.292792793 | 0.241071429 | 0.218323 |
| rs1059520  | HLA-A, HLA-A29.1       | A/G | 06p | A | 0.266666667 | 0.306603774 | 0.218351 |
| rs3213542  | ASCC3                  | C/T | 06q | T | 0.0625      | 0.035714286 | 0.218466 |
| rs3751325  | XRCC6BP1               | A/T | 12q | A | 0.288288288 | 0.34375     | 0.21902  |
| rs3735319  | ZNF777                 | C/T | 07q | T | 0.495535714 | 0.4375      | 0.219277 |
| rs11802875 | NUF2                   | C/T | 01q | T | 0.160714286 | 0.209821429 | 0.219319 |
| rs3801369  |                        | C/T | 07p | C | 0.361607143 | 0.419642857 | 0.219378 |
| rs1127497  |                        | A/G | 20q | A | 0.241071429 | 0.196428571 | 0.219424 |
| rs2298437  | KRTAP19-4              | C/T | 21q | T | 0.47706422  | 0.424528302 | 0.219614 |
| rs8971     | GART                   | A/G | 21q | G | 0.183035714 | 0.227678571 | 0.219732 |
| rs77806    | SPTB                   | A/G | 14q | G | 0.310810811 | 0.258928571 | 0.219804 |
| rs1403811  | OR13F1                 | C/T | 09q | C | 0.321428571 | 0.267857143 | 0.219864 |
| rs2217652  | ZNF177                 | A/G | 19p | G | 0.410714286 | 0.354545455 | 0.219874 |
| rs3816780  | ATAD5                  | C/T | 17q | T | 0.101010101 | 0.14        | 0.219972 |
| rs10747556 | CCDC65                 | A/G | 12q | G | 0.351351351 | 0.408256881 | 0.220041 |
| rs1800209  | CLN5                   | A/G | 13q | G | 0.099099099 | 0.065420561 | 0.220274 |
| rs6708949  | SLC9A4                 | C/G | 02q | G | 0.1875      | 0.232142857 | 0.22028  |
| rs972925   | OR1Q1                  | C/T | 09q | T | 0.165178571 | 0.209821429 | 0.220317 |
| rs153478   | GM2A                   | A/G | 05q | A | 0.34375     | 0.401785714 | 0.220409 |
| rs11211247 | MAST2                  | G/T | 01p | T | 0.225225225 | 0.276785714 | 0.220893 |
| rs757027   |                        | A/C | 22q | C | 0.464285714 | 0.40990991  | 0.220927 |
| rs11858145 | FMN1                   | A/C | 15q | C | 0.364864865 | 0.3125      | 0.220999 |
| rs4501364  |                        | A/T | 05p | A | 0.359813084 | 0.314814815 | 0.221037 |
| rs267745   | DUSP27                 | C/G | 01q | C | 0.495535714 | 0.4375      | 0.221196 |
| rs2727015  | hCG_1990491, LOC652438 | A/C | 11p | C | 0.354545455 | 0.410714286 | 0.221206 |
| rs2070180  | HCLS1                  | A/G | 03q | A | 0.308035714 | 0.254464286 | 0.22135  |
| rs11215158 | FAM55B                 | C/T | 11q | C | 0.151785714 | 0.111607143 | 0.221434 |
| rs203462   | AKAP10                 | A/G | 17p | G | 0.392857143 | 0.334821429 | 0.221731 |
| rs1053079  | TMEM70                 | C/T | 08q | C | 0.159793814 | 0.212643678 | 0.22183  |
| rs1628576  | EPS8L1                 | C/G | 19q | C | 0.191964286 | 0.236607143 | 0.221898 |

|            |                  |     |     |   |             |             |             |          |
|------------|------------------|-----|-----|---|-------------|-------------|-------------|----------|
| rs11208997 | C1orf141         | C/T | 01p | C | 0.159090909 | 0.120535714 | 0.222105    |          |
| rs5743810  | TLR6             | C/T | 04p | T | 0.423423423 | 0.361607143 | 0.222416    |          |
| rs2302443  | NOM1             | C/G | 07q | C | 0.486607143 | 0.455357143 | 0.222979    |          |
| rs310791   | E2F7             | A/G | 12q | A | 0.120535714 | 0.085585586 | 0.223       |          |
| rs757660   | SEC14L2          | A/G | 22q | A | 0.348214286 | 0.297297297 | 0.223001    |          |
| rs7135194  | FGD6             | C/T | 12q | C | 0.294642857 | 0.346846847 | 0.22317     |          |
| rs2227278  | ZBTB32           | A/C | 19q | C | 0.089285714 | 0.059090909 | 0.223271    |          |
| rs2455230  | IQGAP2           | C/G | 05q | G | 0.337837838 | 0.392857143 | 0.22363     |          |
| rs11128668 |                  | A/G | 03p | A | 0.214285714 | 0.263392857 | 0.223907    |          |
| rs11050283 | LOC731039        | A/G | 12p | A | 0.390909091 | 0.339285714 | 0.224016    |          |
| rs6138482  | VSX1             | C/T | 20p | T | 0.227678571 | 0.183035714 | 0.224154    |          |
| rs11229651 | GLYATL2          | C/T | 11q | T | 0.160714286 | 0.205357143 | 0.224227    |          |
| rs2227168  | APOL4            | C/T | 22q | C | 0.477678571 | 0.464285714 | 0.224254    |          |
| rs7289     | CENPF            | C/G | 01q | G | 0.412844037 | 0.470588235 | 0.224303    |          |
| rs2933362  | MUC19, LOC647546 | A/G | 12q | A |             | 0.5         | 0.436936937 | 0.224442 |
| rs634710   | GOLGA1           | C/T | 09q | T |             | 0.40625     | 0.464285714 | 0.224513 |
| rs509749   | LY9              | A/G | 01q | G | 0.463636364 | 0.40990991  | 0.224589    |          |
| rs3747579  | CORO7            | C/T | 16p | C | 0.285714286 | 0.232142857 | 0.224717    |          |
| rs11142587 | TRPM3            | C/T | 09q | C | 0.209821429 | 0.165178571 | 0.224723    |          |
| rs12919    | NOM1             | C/T | 07q | C | 0.486486487 | 0.455357143 | 0.225064    |          |
| rs6133     | SELP             | G/T | 01q | T | 0.116071429 | 0.15625     | 0.225075    |          |
| rs2518112  | FSD1L            | G/T | 09q | T | 0.386363636 | 0.330357143 | 0.225087    |          |
| rs9808232  | ROCK2            | G/T | 02p | T | 0.468468468 | 0.477477478 | 0.225105    |          |
| rs2190997  | DPP6             | A/C | 07q | C | 0.410714286 | 0.46875     | 0.225124    |          |
| rs897416   | KRT38            | C/T | 17q | T | 0.121621622 | 0.085585586 | 0.225169    |          |
| rs11670246 | ZNF85            | C/T | 19p | C | 0.178571429 | 0.138392857 | 0.22518     |          |
| rs1049434  | SLC16A1          | A/T | 01p | T | 0.455357143 | 0.397321429 | 0.22528     |          |
| rs4986850  | BRCA1            | A/G | 17q | A | 0.085585586 | 0.054545454 | 0.225611    |          |
| rs3765968  | CA6              | A/C | 01p | A | 0.370535714 | 0.428571429 | 0.225812    |          |
| rs11018879 | NAALAD2          | A/G | 11q | A | 0.050458716 | 0.027027027 | 0.225973    |          |
| rs3802526  | MASTL            | C/G | 10p | C | 0.069148936 | 0.102150538 | 0.226067    |          |
| rs4259295  |                  | G/T | 07q | G | 0.360576923 | 0.29787234  | 0.226073    |          |
| rs307658   | UBAP2            | A/G | 09p | G | 0.423423423 | 0.366071429 | 0.226187    |          |
| rs3206801  |                  | A/C | 06p | A | 0.344036697 | 0.399082569 | 0.226237    |          |
| rs7180888  |                  | C/T | 15q | T | 0.477678571 | 0.46875     | 0.226242    |          |
| rs4815025  | C20orf19         | C/G | 20p | C | 0.276785714 | 0.330357143 | 0.226355    |          |
| rs11780    | C20orf119        | A/G | 20q | G | 0.392857143 | 0.337837838 | 0.226472    |          |

|            |                      |     |     |   |             |             |          |
|------------|----------------------|-----|-----|---|-------------|-------------|----------|
| rs4911494  | UQCC                 | C/T | 20q | C | 0.339285714 | 0.392857143 | 0.22686  |
| rs4802605  | SLC17A7, LOC645971   | C/T | 19q | T | 0.276785714 | 0.227678571 | 0.226899 |
| rs497387   |                      | C/T | 03p | T | 0.47706422  | 0.419047619 | 0.22693  |
| rs4239529  | ZNF224               | A/T | 19q | A | 0.09009009  | 0.126126126 | 0.227005 |
| rs12489170 | PARP15               | A/G | 03q | A | 0.133928571 | 0.174107143 | 0.227097 |
| rs3732782  | ZNF80                | A/C | 03q | A | 0.321428571 | 0.375       | 0.227344 |
| rs471220   |                      | C/T | 06p | T | 0.183962264 | 0.138613861 | 0.227497 |
| rs6824513  |                      | C/T | 04q | C | 0.396396396 | 0.339285714 | 0.227544 |
| rs2688516  |                      | A/G | 03q | G | 0.174107143 | 0.135135135 | 0.2277   |
| rs1040461  | RAB23                | C/T | 06p | T | 0.058035714 | 0.089285714 | 0.227764 |
| rs9503893  | PRPF4B               | A/G | 06p | A | 0.304545454 | 0.357142857 | 0.228007 |
| rs7990383  | COL4A2               | A/G | 13q | G | 0.346846847 | 0.398148148 | 0.228029 |
| rs2073711  | CILP                 | C/T | 15q | T | 0.40625     | 0.352678571 | 0.228066 |
| rs4478844  | OR2L13, OR2AK2       | A/G | 01q | G | 0.396396396 | 0.339285714 | 0.228281 |
| rs11018769 | LOC120126, LOC730436 | C/G | 11q | G | 0.162162162 | 0.125       | 0.2286   |
| rs7610425  | C3orf16              | C/T | 03q | C | 0.397321429 | 0.455357143 | 0.228739 |
| rs4705336  | PCYOX1L              | C/G | 05q | C | 0.183035714 | 0.142857143 | 0.228805 |
| rs30168    | DNAH5                | A/G | 05p | G | 0.454545454 | 0.491071429 | 0.228836 |
| rs6950119  | JHDM1D               | G/T | 07q | T | 0.352678571 | 0.299107143 | 0.22919  |
| rs2228527  | ERCC6                | A/G | 10q | G | 0.25        | 0.202702703 | 0.229268 |
| rs11126472 | TMEM166              | C/T | 02p | T | 0.075892857 | 0.049107143 | 0.229342 |
| rs6118970  |                      | A/C | 20q | A | 0.209821429 | 0.25        | 0.229416 |
| rs7698598  | SYNPO2               | A/G | 04q | A | 0.094594595 | 0.130630631 | 0.229669 |
| rs2074071  | ZNF419               | A/G | 19q | A | 0.299107143 | 0.354545454 | 0.229671 |
| rs231331   |                      | C/T | 04p | T | 0.183035714 | 0.227678571 | 0.22974  |
| rs6696455  | TNN                  | C/T | 01q | C | 0.419642857 | 0.364864865 | 0.230098 |
| rs2296916  | BYSL                 | A/G | 06p | A | 0.09375     | 0.129464286 | 0.230398 |
| rs1342440  | C8A                  | C/G | 01p | G | 0.053571429 | 0.031531532 | 0.230506 |
| rs11656487 |                      | C/G | 17p | C | 0.379464286 | 0.436936937 | 0.230562 |
| rs2273697  | ABCC2                | A/G | 10q | A | 0.223214286 | 0.178571429 | 0.230642 |
| rs709683   | KIAA0090             | C/G | 01p | G | 0.323809524 | 0.261261261 | 0.231047 |
| rs1045644  | COCH                 | C/G | 14q | C | 0.352678571 | 0.40625     | 0.23109  |
| rs8073787  | USP6                 | C/T | 17p | T | 0.482142857 | 0.428571429 | 0.231308 |
| rs9908414  | ZNF594               | A/G | 17p | G | 0.482142857 | 0.428571429 | 0.231308 |
| rs3777513  |                      | C/G | 06q | G | 0.40625     | 0.463636364 | 0.231374 |
| rs4804079  | MGC33407             | G/T | 19p | G | 0.481818182 | 0.464285714 | 0.231393 |
| rs12507582 | FLJ31033             | C/T | 04q | T | 0.383928571 | 0.330357143 | 0.231709 |

|            |             |     |     |   |             |             |          |
|------------|-------------|-----|-----|---|-------------|-------------|----------|
| rs194524   | STEAP2      | A/G | 07q | A | 0.482142857 | 0.459821429 | 0.231843 |
| rs1510068  | KRT40       | C/T | 17q | T | 0.274774775 | 0.328828829 | 0.232097 |
| rs1820965  | TAF1B       | A/C | 02p | C | 0.263392857 | 0.316964286 | 0.232124 |
| rs9370096  | PKHD1       | A/G | 06p | G | 0.459821429 | 0.481651376 | 0.232136 |
| rs2444257  | RIF1        | A/T | 02q | T | 0.306306306 | 0.254464286 | 0.232145 |
| rs2267808  | AMPH        | C/T | 07p | C | 0.160714286 | 0.120535714 | 0.232384 |
| rs3848666  | PRODH2      | C/G | 19q | C | 0.111111111 | 0.14953271  | 0.232412 |
| rs16027    | CACNA1A     | A/G | 19p | A | 0.085585586 | 0.120535714 | 0.232819 |
| rs867529   | EIF2AK3     | C/G | 02p | C | 0.265765766 | 0.316964286 | 0.23302  |
| rs4820853  | SEC14L3     | A/G | 22q | G | 0.34375     | 0.290909091 | 0.233486 |
| rs1997660  | PGBD1       | C/T | 06p | C | 0.315315315 | 0.369369369 | 0.23364  |
| rs11697430 | LOC728902   | A/G | 20q | G | 0.071428571 | 0.044642857 | 0.23386  |
| rs7453944  | NMBR        | G/T | 06q | T | 0.066964286 | 0.040178571 | 0.234663 |
| rs6517105  |             | C/T | 21q | C | 0.205357143 | 0.165178571 | 0.234785 |
| rs1805082  | NPC1        | A/G | 18q | G | 0.486363636 | 0.454954955 | 0.234823 |
| rs3740427  | hCG_1795091 | A/G | 10q | A | 0.147619048 | 0.189320388 | 0.235172 |
| rs2429060  |             | A/G | 01p | A | 0.31981982  | 0.370535714 | 0.235385 |
| rs1510069  | KRT40       | C/T | 17q | C | 0.272321429 | 0.325892857 | 0.235555 |
| rs3764633  | CCDC123     | A/G | 19q | A | 0.216216216 | 0.169642857 | 0.23588  |
| rs14115    | UCRC        | A/G | 22q | G | 0.071428571 | 0.045045045 | 0.236016 |
| rs8027765  | ISG20L1     | A/G | 15q | A | 0.09375     | 0.0625      | 0.236026 |
| rs2098386  | CEBPZ       | A/G | 02p | G | 0.166666667 | 0.125       | 0.236171 |
| rs838759   | LOC340900   | A/G | 10p | A | 0.27027027  | 0.218181818 | 0.23628  |
| rs560505   | C6orf10     | C/T | 06p | C | 0.428571429 | 0.375       | 0.236709 |
| rs2515960  | NOL14       | C/T | 04p | C | 0.464285714 | 0.40625     | 0.236753 |
| rs2290272  | SLC28A1     | C/T | 15q | T | 0.337837838 | 0.392857143 | 0.237025 |
| rs6468601  |             | C/T | 08q | T | 0.102678571 | 0.142857143 | 0.237044 |
| rs3740909  | CDON        | C/T | 11q | T | 0.068181818 | 0.1         | 0.23706  |
| rs3810950  | CHAT        | A/G | 10q | A | 0.209090909 | 0.256756757 | 0.237291 |
| rs11073619 | WDR73       | C/T | 15q | T | 0.084821429 | 0.119266055 | 0.237502 |
| rs2403569  |             | A/C | 11p | C | 0.459821429 | 0.401785714 | 0.237544 |
| rs11249602 | ZFP2        | C/T | 05q | T | 0.071428571 | 0.102678571 | 0.237615 |
| rs194520   | STEAP2      | G/T | 07q | G | 0.473214286 | 0.46875     | 0.237688 |
| rs3204145  | IKBKAP      | A/T | 09q | A | 0.213541667 | 0.17        | 0.238088 |
| rs2297241  | ZC3HAV1     | C/G | 07q | C | 0.135135135 | 0.172727273 | 0.238698 |
| rs1216183  | CNTN5       | A/T | 11q | T | 0.102678571 | 0.138392857 | 0.238799 |
| rs1131471  |             | A/C | 01q | A | 0.455357143 | 0.486607143 | 0.238898 |

|            |           |     |     |   |             |             |          |
|------------|-----------|-----|-----|---|-------------|-------------|----------|
| rs1557466  |           | A/G | 11q | G | 0.21875     | 0.265765766 | 0.23893  |
| rs4726452  | LOC401410 | C/G | 07q | C | 0.355855856 | 0.304545454 | 0.239403 |
| rs3184504  | SH2B3     | C/T | 12q | C | 0.495454546 | 0.444954128 | 0.239464 |
| rs9250     | SENP6     | A/G | 06q | G | 0.277227723 | 0.326530612 | 0.239593 |
| rs9481410  | C6orf167  | A/G | 06q | G | 0.226851852 | 0.278301887 | 0.239746 |
| rs2489720  | CCNYL2    | C/T | 10q | T | 0.316964286 | 0.368181818 | 0.239834 |
| rs6743376  | IL1F10    | A/C | 02q | C | 0.26344086  | 0.32        | 0.240002 |
| rs9319962  |           | G/T | 18q | T | 0.135135135 | 0.098214286 | 0.240047 |
| rs7249755  | LOC388503 | C/T | 19p | C | 0.147321429 | 0.111607143 | 0.240687 |
| rs2303920  | GRHL1     | A/G | 02p | A | 0.216981132 | 0.172897196 | 0.24085  |
| rs9268368  | C6orf10   | C/T | 06p | C | 0.433035714 | 0.379464286 | 0.240955 |
| rs1033500  | C6orf10   | C/T | 06p | T | 0.433035714 | 0.379464286 | 0.240955 |
| rs7228940  | CEP192    | A/G | 18p | A | 0.153153153 | 0.113636364 | 0.241411 |
| rs3803981  | RIN2      | A/T | 20p | A | 0.162162162 | 0.205607477 | 0.241471 |
| rs853684   | ZNF323    | A/G | 06p | G | 0.346846847 | 0.400900901 | 0.24149  |
| rs11155297 | FUCA2     | G/T | 06q | T | 0.263636364 | 0.214285714 | 0.241504 |
| rs634858   |           | G/T | 05p | G | 0.165178571 | 0.209821429 | 0.241521 |
| rs10997975 | MYPN      | A/G | 10q | A | 0.44        | 0.495049505 | 0.241786 |
| rs11672918 |           | C/T | 19p | T | 0.172727273 | 0.217592593 | 0.241969 |
| rs4988956  | IL1RL1    | A/G | 02q | A | 0.396396396 | 0.340909091 | 0.242193 |
| rs4358434  | LOC391656 | C/T | 04q | C | 0.357142857 | 0.299107143 | 0.242256 |
| rs3809140  | LOC729204 | C/T | 12p | T | 0.21875     | 0.265765766 | 0.242438 |
| rs2532500  | TAPBPL    | C/T | 12p | T | 0.325892857 | 0.375       | 0.242446 |
| rs6847454  |           | A/T | 04q | T | 0.403669725 | 0.458715596 | 0.24245  |
| rs2236547  | C9orf66   | A/G | 09p | A | 0.190721649 | 0.141414141 | 0.242815 |
| rs10805933 |           | A/T | 05q | T | 0.28125     | 0.232142857 | 0.242864 |
| rs1909260  |           | A/G | 11p | A | 0.153153153 | 0.116071429 | 0.242996 |
| rs1864372  | hCG_38984 | A/G | 04q | G | 0.107142857 | 0.076576577 | 0.243173 |
| rs9630218  |           | C/T | 11q | T | 0.357142857 | 0.40990991  | 0.243243 |
| rs680110   |           | A/G | 03p | A | 0.482142857 | 0.428571429 | 0.243409 |
| rs2074059  | ZNF772    | A/T | 19q | T | 0.352678571 | 0.40625     | 0.243508 |
| rs4936880  | OR10G4    | A/G | 11q | G | 0.439814815 | 0.495454546 | 0.243573 |
| rs571391   | IMPG2     | A/G | 03q | G | 0.414414414 | 0.36036036  | 0.243823 |
| rs9771165  |           | C/G | 07p | G | 0.169642857 | 0.214285714 | 0.243923 |
| rs710446   | KNG1      | A/G | 03q | G | 0.450450451 | 0.396396396 | 0.243953 |
| rs1792120  | SORL1     | A/G | 11q | G | 0.115       | 0.153061225 | 0.244006 |
| rs513873   | OR9G4     | A/G | 11q | G | 0.330275229 | 0.281818182 | 0.244275 |

|            |                |     |     |   |             |             |          |
|------------|----------------|-----|-----|---|-------------|-------------|----------|
| rs679899   | APOB           | A/G | 02p | A | 0.419642857 | 0.473214286 | 0.244621 |
| rs12632942 | SCN10A         | A/G | 03p | G | 0.238738739 | 0.191964286 | 0.244689 |
| rs658845   |                | C/T | 11q | T | 0.26        | 0.210784314 | 0.244739 |
| rs247897   | ATP2C2         | A/T | 16q | A | 0.361607143 | 0.414414414 | 0.244966 |
| rs2532924  | LOC646570      | A/G | 06p | A | 0.459821429 | 0.400900901 | 0.2452   |
| rs1233428  | ZNF233         | A/C | 19q | A | 0.326530612 | 0.38        | 0.245206 |
| rs10846559 | DNAH10         | A/G | 12q | A | 0.414414414 | 0.359090909 | 0.245301 |
| rs1808231  | ZNF767         | C/T | 07q | T | 0.342342342 | 0.304545455 | 0.245329 |
| rs9685931  | GPR78          | A/G | 04p | A | 0.095454545 | 0.129464286 | 0.24559  |
| rs2241714  | B9D2           | A/G | 19q | A | 0.346846847 | 0.294642857 | 0.245617 |
| rs3784038  | C14orf45       | A/T | 14q | A | 0.495535714 | 0.445945946 | 0.245682 |
| rs10016702 | KIAA1729       | A/G | 04p | G | 0.111607143 | 0.080357143 | 0.245702 |
| rs975263   | 7A5            | C/T | 07p | T | 0.241071429 | 0.290178571 | 0.245849 |
| rs11622969 | OR6S1          | C/T | 14q | C | 0.5         | 0.445945946 | 0.245922 |
| rs12495805 | CCDC13         | A/T | 03p | T | 0.147321429 | 0.1875      | 0.246075 |
| rs10417922 | SLC27A1        | C/T | 19p | C | 0.075892857 | 0.107142857 | 0.24617  |
| rs891398   | CHRNA2         | C/T | 08p | C | 0.459821429 | 0.486607143 | 0.246204 |
| rs9475077  | FAM83B         | A/C | 06p | A | 0.142857143 | 0.184684685 | 0.246238 |
| rs4934     | SERPINA3       | A/G | 14q | G | 0.486363636 | 0.455357143 | 0.246239 |
| rs1536207  | FLJ32682       | G/T | 13q | T | 0.357142857 | 0.410714286 | 0.246409 |
| rs7745023  | C6orf170       | C/T | 06q | T | 0.463636364 | 0.40625     | 0.246468 |
| rs6923761  | GLP1R          | A/G | 06p | A | 0.379464286 | 0.325892857 | 0.246837 |
| rs1056445  | MTIF2          | A/C | 02p | C | 0.303191489 | 0.349462366 | 0.246864 |
| rs9605146  | XKR3           | A/G | 22q | A | 0.412621359 | 0.357142857 | 0.246955 |
| rs2304456  | KNG1           | G/T | 03q | G | 0.09375     | 0.126126126 | 0.247053 |
| rs1466684  | P2RY13, MED12L | C/T | 03q | C | 0.129464286 | 0.166666667 | 0.2472   |
| rs67179    | NEBL           | C/T | 10p | T | 0.348214286 | 0.401785714 | 0.247255 |
| rs1127732  | PDCD6IP        | C/T | 03p | T | 0.098214286 | 0.133928571 | 0.247404 |
| rs3829827  |                | C/T | 12p | T | 0.160714286 | 0.121621622 | 0.247895 |
| rs2279587  | ITGA1          | C/T | 05q | T | 0.076576577 | 0.04954955  | 0.248165 |
| rs11622794 | OR6S1          | A/G | 14q | G | 0.490990991 | 0.4375      | 0.248313 |
| rs10826986 | RP11-49L2.2    | A/G | 10p | G | 0.116071429 | 0.153153153 | 0.248532 |
| rs15786    | ATP13A2        | A/G | 01p | A | 0.053571429 | 0.081081081 | 0.248586 |
| rs1970921  | MST1, RNF123   | C/T | 01p | T | 0.386597938 | 0.351485149 | 0.248862 |
| rs7249735  |                | A/C | 19q | C | 0.258928571 | 0.308035714 | 0.248928 |
| rs242017   | EFCAB4B        | C/T | 12p | T | 0.321428571 | 0.272321429 | 0.248943 |



| rsID       | Gene                        | Alleles | Position | Strand | MAF1        | MAF2        | MAF3     |
|------------|-----------------------------|---------|----------|--------|-------------|-------------|----------|
| rs2903616  | CALN1, LOC728453, LOC730288 | A/G     | 07q      | A      | 0.290178571 | 0.34375     | 0.249177 |
| rs950169   | ADAMTSL3                    | A/G     | 15q      | A      | 0.322727273 | 0.272321429 | 0.249299 |
| rs12453150 | SLFN11                      | A/C     | 17q      | C      | 0.419642857 | 0.473214286 | 0.249389 |
| rs7853994  | ANKRD18B                    | C/T     | 09p      | C      | 0.21875     | 0.174107143 | 0.249439 |
| rs1664081  |                             | A/G     | 11q      | A      | 0.140909091 | 0.178571429 | 0.249476 |
| rs1059509  | HLA-A, HLA-A29.1            | A/C     | 06p      | A      | 0.331818182 | 0.366071429 | 0.249814 |
| rs7262903  | VISA                        | A/C     | 20p      | A      | 0.147321429 | 0.1875      | 0.249861 |
| rs4528317  | OVCH2                       | A/T     | 11p      | T      | 0.131313131 | 0.098039216 | 0.250383 |
| rs1933631  | CAPN9                       | A/C     | 01q      | C      | 0.288990826 | 0.339285714 | 0.250692 |
| rs660833   |                             | A/G     | 05p      | A      | 0.071428571 | 0.103603604 | 0.250758 |
| rs9583500  | COL4A2                      | C/T     | 13q      | T      | 0.259090909 | 0.21559633  | 0.250913 |
| rs560096   | IGHMBP2                     | C/T     | 11q      | T      | 0.147321429 | 0.184684685 | 0.25094  |
| rs11035396 | OR52E2                      | A/G     | 11p      | A      | 0.098130841 | 0.133333333 | 0.251166 |
| rs2358355  | RP11-49L2.2                 | A/G     | 10p      | G      | 0.13963964  | 0.178571429 | 0.251173 |
| rs581157   | CD300E                      | G/T     | 17q      | G      | 0.441964286 | 0.388392857 | 0.251228 |
| rs428073   | TAOK3                       | C/T     | 12q      | C      | 0.274774775 | 0.325892857 | 0.251236 |
| rs10839604 | GVIN1                       | C/G     | 11p      | C      | 0.160714286 | 0.202702703 | 0.251749 |
| rs323347   | TEX15                       | A/G     | 08p      | G      | 0.177272727 | 0.21875     | 0.251766 |
| rs768994   | RSPH3                       | C/T     | 06q      | C      | 0.126126126 | 0.090909091 | 0.251797 |
| rs3087210  |                             | A/G     | 01q      | A      | 0.084821429 | 0.058035714 | 0.251849 |
| rs1801249  | ATP7B                       | C/T     | 13q      | T      | 0.427927928 | 0.376146789 | 0.252416 |
| rs1799841  | CST5                        | C/T     | 20p      | C      | 0.424107143 | 0.370535714 | 0.252446 |
| rs6180     | GHR                         | A/C     | 05p      | C      | 0.401785714 | 0.454954955 | 0.252449 |
| rs6811863  | PTTG2, TBC1D1               | C/G     | 04p      | G      | 0.428571429 | 0.477477478 | 0.252753 |
| rs9469     | EXOSC8, FAM48A              | C/T     | 13q      | T      | 0.375       | 0.322727273 | 0.25279  |
| rs8018720  | SEC23A                      | C/G     | 14q      | G      | 0.132352941 | 0.17        | 0.252791 |
| rs3177663  |                             | C/T     | 16q      | C      | 0.190909091 | 0.153153153 | 0.252797 |
| rs9264619  |                             | A/G     | 06p      | A      | 0.322727273 | 0.274774775 | 0.253024 |
| rs3803412  | DIS3L                       | C/T     | 15q      | C      | 0.279279279 | 0.328828829 | 0.253049 |
| rs2411837  | LINS1                       | C/G     | 15q      | G      | 0.45        | 0.397321429 | 0.25309  |
| rs2972588  | MBD3L1                      | C/T     | 19p      | C      | 0.081081081 | 0.053571429 | 0.253098 |
| rs2546423  | OR2V2                       | C/T     | 05q      | C      | 0.446428571 | 0.495495495 | 0.253532 |
| rs2274271  | DLG7                        | A/G     | 14q      | A      | 0.120535714 | 0.085585586 | 0.253551 |
| rs399098   | ZNF45                       | A/G     | 19q      | A      | 0.490196078 | 0.455       | 0.253621 |
| rs892261   |                             | C/T     | 13q      | T      | 0.346846847 | 0.400900901 | 0.253727 |
| rs903603   | MOBK2B                      | C/T     | 09p      | T      | 0.473214286 | 0.419642857 | 0.253796 |

|            |              |     |     |   |             |             |          |
|------------|--------------|-----|-----|---|-------------|-------------|----------|
| rs2152143  | MKI67        | A/G | 10q | A | 0.272321429 | 0.325892857 | 0.253917 |
| rs1034405  | C3orf18      | C/T | 03p | C | 0.116071429 | 0.084821429 | 0.254079 |
| rs6670094  |              | A/C | 01q | A | 0.188073394 | 0.146788991 | 0.254302 |
| rs1713480  | FLJ11151     | A/G | 16p | A | 0.071428571 | 0.102678571 | 0.254323 |
| rs12069239 | FBXO42       | C/G | 01p | C | 0.405405405 | 0.355855856 | 0.254537 |
| rs2657880  | GLS2, SPRYD4 | C/G | 12q | G | 0.235       | 0.18877551  | 0.254598 |
| rs7968231  | C12orf63     | A/G | 12q | G | 0.131818182 | 0.169642857 | 0.254664 |
| rs9627281  | LOC150383    | A/G | 22q | G | 0.122727273 | 0.162162162 | 0.254709 |
| rs3755652  | SLC4A7       | C/T | 03p | T | 0.267857143 | 0.316964286 | 0.254725 |
| rs3739407  | MTUS1        | C/T | 08p | T | 0.134259259 | 0.171171171 | 0.255099 |
| rs4920246  | TARBP1       | C/T | 01q | C | 0.297297297 | 0.25        | 0.255275 |
| rs4359426  | CCL22        | A/C | 16q | A | 0.058035714 | 0.035714286 | 0.255375 |
| rs2303063  | SPINK5       | A/G | 05q | G | 0.455445545 | 0.489583333 | 0.255425 |
| rs2228468  | CCBP2        | A/C | 03p | C | 0.398058252 | 0.451456311 | 0.255711 |
| rs4242778  | tAKR         | C/T | 10p | T | 0.288288288 | 0.241071429 | 0.256286 |
| rs3740469  | SLK          | A/G | 10q | A | 0.272727273 | 0.227678571 | 0.256504 |
| rs9383583  | RAET1E       | C/T | 06q | T | 0.147321429 | 0.1875      | 0.256539 |
| rs3210400  | SCLY         | A/G | 02q | A | 0.45        | 0.394495413 | 0.256642 |
| rs3814238  | RAP1B        | G/T | 12q | T | 0.223214286 | 0.18018018  | 0.256749 |
| rs2425049  | FAM83C       | C/T | 20q | T | 0.183035714 | 0.227678571 | 0.256844 |
| rs2277441  |              | G/T | 13q | T | 0.063636364 | 0.040540541 | 0.257041 |
| rs1805081  | NPC1         | A/G | 18q | G | 0.428571429 | 0.366666667 | 0.257232 |
| rs1042381  | SDC2         | A/T | 08q | A | 0.175675676 | 0.21875     | 0.257276 |
| rs229587   | SPTB         | C/T | 14q | T | 0.324074074 | 0.376190476 | 0.257426 |
| rs2297603  | COL15A1      | A/C | 09q | A | 0.098214286 | 0.135135135 | 0.257777 |
| rs3744793  | USP36        | A/G | 17q | A | 0.401785714 | 0.454954955 | 0.257961 |
| rs6787974  |              | A/G | 03p | A | 0.120535714 | 0.15625     | 0.258448 |
| rs1805388  | LIG4         | C/T | 13q | T | 0.166666667 | 0.129464286 | 0.258636 |
| rs1535700  |              | C/G | 01p | C | 0.160714286 | 0.200892857 | 0.258847 |
| rs11006128 |              | C/G | 10q | C | 0.075892857 | 0.105504587 | 0.258885 |
| rs3128655  | LOC127602    | A/T | 01q | A | 0.116071429 | 0.080357143 | 0.259073 |
| rs1683696  | TMEM132C     | G/T | 12q | G | 0.464285714 | 0.481981982 | 0.259092 |
| rs638929   | NEBL         | G/T | 10p | G | 0.348214286 | 0.400900901 | 0.260071 |
| rs11583800 | ZRANB2       | C/G | 01p | C | 0.117117117 | 0.084821429 | 0.260152 |
| rs2286586  | MXRA7        | C/T | 17q | T | 0.36036036  | 0.308035714 | 0.26016  |
| rs10839632 | OR10A2       | C/T | 11p | C | 0.223214286 | 0.267857143 | 0.260197 |
| rs3751109  | MLPH         | A/G | 02q | G | 0.147321429 | 0.1875      | 0.260504 |

|            |                   |     |     |   |             |             |          |
|------------|-------------------|-----|-----|---|-------------|-------------|----------|
| rs1050998  | CXCL16            | C/T | 17p | C | 0.468181818 | 0.412844037 | 0.260628 |
| rs871545   | ZNF295            | A/G | 21q | G | 0.147321429 | 0.1875      | 0.26084  |
| rs1007160  | SLC7A9            | A/C | 19q | A | 0.378378378 | 0.325892857 | 0.261344 |
| rs9664945  | VWA2              | A/G | 10q | A | 0.283783784 | 0.236607143 | 0.261596 |
| rs1529151  | C6orf91           | A/G | 06q | A | 0.339285714 | 0.288288288 | 0.261671 |
| rs10410943 | MGC33407          | A/G | 19p | A | 0.325892857 | 0.28125     | 0.261875 |
| rs7225887  | B3GNTL1           | C/T | 17q | T | 0.204545455 | 0.247747748 | 0.262009 |
| rs1409986  | PTGER3            | C/T | 01p | T | 0.072072072 | 0.04587156  | 0.262063 |
| rs2232613  | LBP               | C/T | 20q | T | 0.053571429 | 0.081081081 | 0.262103 |
| rs1195631  |                   | A/C | 16q | C | 0.292792793 | 0.245535714 | 0.262218 |
| rs7210049  | RNF157, LOC643159 | C/T | 17q | T | 0.477678571 | 0.46875     | 0.262221 |
| rs7696816  | C4orf21           | C/T | 04q | C | 0.428571429 | 0.375       | 0.262265 |
| rs4926     | SERPING1          | A/G | 11q | A | 0.227678571 | 0.274774775 | 0.262514 |
| rs2835239  | SETD4             | C/T | 21q | C | 0.0625      | 0.040178571 | 0.262565 |
| rs9288938  | SLC9A10           | A/C | 03q | A | 0.267857143 | 0.223214286 | 0.262967 |
| rs2302182  | C19orf15          | C/T | 19q | C | 0.125       | 0.162162162 | 0.262972 |
| rs2274223  | PLCE1             | A/G | 10q | G | 0.351351351 | 0.303571429 | 0.2632   |
| rs2272118  | LOC401052         | C/T | 03p | C | 0.245535714 | 0.200892857 | 0.263323 |
| rs10818708 | OR1N1             | A/G | 09q | A | 0.441441441 | 0.388392857 | 0.263345 |
| rs2688517  |                   | A/G | 03q | G | 0.171171171 | 0.135135135 | 0.263359 |
| rs2273553  |                   | A/G | 11p | A | 0.211711712 | 0.174107143 | 0.263426 |
| rs366793   | ZNF701            | C/T | 19q | C | 0.315315315 | 0.268181818 | 0.263926 |
| rs1129923  | DUSP23            | A/G | 01q | A | 0.102678571 | 0.075892857 | 0.264239 |
| rs160278   | VCAN              | A/T | 05q | T | 0.436936937 | 0.490990991 | 0.265122 |
| rs239798   | FAM83B            | A/C | 06p | C | 0.142857143 | 0.183035714 | 0.265208 |
| rs895497   | IL1F6             | C/T | 02q | T | 0.245535714 | 0.290178571 | 0.265394 |
| rs6000172  | APOL4             | A/G | 22q | G | 0.482142857 | 0.464285714 | 0.265464 |
| rs4950400  |                   | C/G | 01q | G | 0.232142857 | 0.279816514 | 0.265919 |
| rs913770   | C9orf106          | A/G | 09q | A | 0.054054054 | 0.03271028  | 0.266018 |
| rs7041     | GC                | G/T | 04q | T | 0.4375      | 0.491071429 | 0.266103 |
| rs362691   | RELN              | C/G | 07q | C | 0.138392857 | 0.104545454 | 0.26625  |
| rs3177980  | SELL              | C/T | 01q | C | 0.272727273 | 0.318181818 | 0.266699 |
| rs11677877 | COL4A3            | A/G | 02q | G | 0.080357143 | 0.053571429 | 0.266714 |
| rs1014129  |                   | C/T | 17q | T | 0.267857143 | 0.223214286 | 0.267062 |
| rs913855   |                   | A/C | 09q | A | 0.080357143 | 0.113636364 | 0.267116 |
| rs11168070 | ADRB2             | C/G | 05q | G | 0.40625     | 0.459821429 | 0.267122 |
| rs2283432  | FANCI             | C/G | 15q | G | 0.316964286 | 0.361607143 | 0.267177 |

|            |                      |     |     |   |             |             |          |
|------------|----------------------|-----|-----|---|-------------|-------------|----------|
| rs2279105  | KIAA1754L            | C/T | 02q | T | 0.370535714 | 0.321428571 | 0.267234 |
| rs2532501  | TAPBPL               | C/T | 12p | T | 0.328828829 | 0.375       | 0.267239 |
| rs3749780  | SLC25A2              | A/G | 05q | A | 0.162162162 | 0.202702703 | 0.267354 |
| rs2251220  | KIAA1549             | A/G | 07q | A | 0.370535714 | 0.316964286 | 0.267365 |
| rs2242416  | SLC22A7, CRIP3       | C/T | 06p | T | 0.414414414 | 0.366071429 | 0.267526 |
| rs12368787 | CCDC38               | A/C | 12q | A | 0.111607143 | 0.148648649 | 0.26761  |
| rs8050871  | ZNF19                | C/G | 16q | C | 0.258928571 | 0.303571429 | 0.26767  |
| rs2567707  | COL27A1              | C/T | 09q | T | 0.227678571 | 0.272727273 | 0.267672 |
| rs4298923  | OR5B2                | A/G | 11q | G | 0.433035714 | 0.486363636 | 0.267691 |
| rs3817428  | ACAN                 | C/G | 15q | C | 0.220720721 | 0.263636364 | 0.26783  |
| rs681176   | TXNL1                | A/G | 18q | A | 0.117117117 | 0.151785714 | 0.267958 |
| rs9582626  | LOC643677            | C/G | 13q | C | 0.241071429 | 0.198198198 | 0.268016 |
| rs1234121  | GPR116               | A/G | 06p | A | 0.459090909 | 0.40625     | 0.268425 |
| rs942132   |                      | C/T | 06q | C | 0.225225225 | 0.183035714 | 0.268544 |
| rs3739915  | TTF1                 | G/T | 09q | T | 0.058558559 | 0.036036036 | 0.268683 |
| rs2058194  | SCN4A                | C/T | 17q | T | 0.473214286 | 0.419642857 | 0.268933 |
| rs1351419  | C4orf35              | C/T | 04q | C | 0.058035714 | 0.036036036 | 0.268972 |
| rs11024333 | OTOG                 | A/G | 11p | A | 0.157657658 | 0.121621622 | 0.269192 |
| rs1257095  | FAHD2B, LOC648170    | A/G | 02q | A | 0.125       | 0.09375     | 0.269305 |
| rs6713162  | NEB                  | A/G | 02q | G | 0.13963964  | 0.178571429 | 0.269355 |
| rs1004970  |                      | A/C | 22q | A | 0.397321429 | 0.346846847 | 0.26948  |
| rs2276314  | C18orf21             | A/G | 18q | G | 0.151785714 | 0.191964286 | 0.269519 |
| rs1573649  | HLA-DQB2             | C/T | 06p | C | 0.427927928 | 0.477272727 | 0.269588 |
| rs10250905 | TXNDC3               | C/T | 07p | T | 0.21875     | 0.263392857 | 0.269783 |
| rs2584625  | PSMC5, FTSJ3         | C/G | 17q | C | 0.379464286 | 0.433035714 | 0.269877 |
| rs2727288  | FTSJ3                | A/T | 17q | A | 0.379464286 | 0.433035714 | 0.269877 |
| rs7322112  | LOC643677            | C/T | 13q | C | 0.243243243 | 0.200892857 | 0.27029  |
| rs7843605  | TRIM55               | A/G | 08q | G | 0.09009009  | 0.063063063 | 0.270406 |
| rs10954696 | PCLO                 | C/T | 07q | T | 0.392857143 | 0.339285714 | 0.270653 |
| rs507879   | CASP5                | A/G | 11q | G | 0.441964286 | 0.388392857 | 0.270715 |
| rs915183   |                      | A/C | 20q | A | 0.423423423 | 0.370535714 | 0.271098 |
| rs7652177  | FNDC3B               | C/G | 03q | C | 0.491071429 | 0.454954955 | 0.271483 |
| rs6735208  | NEB                  | A/T | 02q | T | 0.142857143 | 0.18018018  | 0.271669 |
| rs3733227  | SCD5                 | C/G | 04q | G | 0.272321429 | 0.325892857 | 0.271685 |
| rs8940     | CAV2                 | C/G | 07q | G | 0.198198198 | 0.160714286 | 0.271786 |
| rs10403787 | LOC388503            | A/G | 19p | A | 0.133928571 | 0.102678571 | 0.271917 |
| rs386428   | LOC341346, LOC645320 | A/T | 12p | A | 0.224770642 | 0.181818182 | 0.272281 |

|            |                       |     |     |   |             |             |          |
|------------|-----------------------|-----|-----|---|-------------|-------------|----------|
| rs11208084 | LOC199897, LOC652444  | C/G | 01p | G | 0.205357143 | 0.166666667 | 0.272551 |
| rs1045216  | PLEKHA1               | A/G | 10q | A | 0.432432432 | 0.380733945 | 0.272681 |
| rs1736924  | HLA-F                 | A/G | 06p | G | 0.172727273 | 0.135514019 | 0.272883 |
| rs2075171  |                       | C/T | 02p | T | 0.236607143 | 0.197247706 | 0.273029 |
| rs6778728  | IFT80                 | A/T | 03q | A | 0.261261261 | 0.21875     | 0.273044 |
| rs749670   | ZNF646                | C/T | 16p | C | 0.410714286 | 0.359090909 | 0.273552 |
| rs316019   | SLC22A2               | G/T | 06q | T | 0.142857143 | 0.108108108 | 0.273893 |
| rs3843273  | QSOX1                 | C/T | 01q | C | 0.081081081 | 0.109090909 | 0.273941 |
| rs3732378  | CX3CR1                | A/G | 03p | A | 0.129464286 | 0.165178571 | 0.274022 |
| rs2305799  | ACP5                  | C/T | 19p | T | 0.154545455 | 0.120535714 | 0.274097 |
| rs12339210 | DFNB31                | C/G | 09q | C | 0.147321429 | 0.111607143 | 0.274379 |
| rs4332350  | UBXD5                 | A/C | 01p | A | 0.089285714 | 0.0625      | 0.275025 |
| rs2072590  |                       | G/T | 02q | T | 0.327272727 | 0.277777778 | 0.275386 |
| rs5743509  | BPI                   | C/T | 20q | T | 0.058558559 | 0.035714286 | 0.275442 |
| rs2863095  | PEO1, MRPL43          | C/T | 10q | T | 0.165178571 | 0.126126126 | 0.275802 |
| rs2484661  | C9orf86               | A/G | 09q | G | 0.216216216 | 0.258928571 | 0.275823 |
| rs1785506  | UBAP2                 | A/G | 09p | G | 0.418918919 | 0.366071429 | 0.275894 |
| rs3739238  | SLC45A4               | A/G | 08q | A | 0.433035714 | 0.383928571 | 0.276671 |
| rs7145814  | OR5AU1                | C/T | 14q | T | 0.227678571 | 0.1875      | 0.276753 |
| rs2052937  | GPR113                | C/T | 02p | C | 0.330357143 | 0.283783784 | 0.276777 |
| rs9290264  | SI                    | A/C | 03q | A | 0.3125      | 0.361607143 | 0.276843 |
| rs2243639  | SFTPD                 | C/T | 10q | T | 0.40625     | 0.355855856 | 0.276954 |
| rs9530     | GUSB                  | C/T | 07q | T | 0.477678571 | 0.422727273 | 0.276969 |
| rs6761637  | MARCO                 | C/T | 02q | C | 0.0625      | 0.040178571 | 0.277006 |
| rs8187694  |                       | A/T | 10q | A | 0.09009009  | 0.0625      | 0.277348 |
| rs10487075 | ZNF804B               | A/G | 07q | A | 0.089285714 | 0.120535714 | 0.277556 |
| rs7222013  | SLC16A6               | A/T | 17q | T | 0.242857143 | 0.291262136 | 0.277597 |
| rs1048886  | C6orf57               | A/G | 06q | G | 0.199074074 | 0.160377359 | 0.277796 |
| rs350229   | LOC92017, hCG_1983896 | C/T | 16p | T | 0.116071429 | 0.084821429 | 0.277913 |
| rs6784322  | FBXW12                | A/T | 03p | T | 0.485294118 | 0.456730769 | 0.278261 |
| rs8130507  |                       | C/T | 21q | T | 0.373873874 | 0.424107143 | 0.278597 |
| rs10485183 | DSE                   | C/T | 06q | T | 0.299107143 | 0.263392857 | 0.27861  |
| rs1800255  | COL3A1                | A/G | 02q | A | 0.252252252 | 0.295454545 | 0.278705 |
| rs2029615  | MUC19, LOC730512      | C/T | 12q | C | 0.352678571 | 0.299107143 | 0.278711 |
| rs4416370  |                       | A/G | 03p | G | 0.227678571 | 0.272727273 | 0.278788 |
| rs1050565  | BLMH                  | A/G | 17q | G | 0.3125      | 0.361607143 | 0.278897 |
| rs2236426  | ZC3HAV1               | C/T | 07q | T | 0.135135135 | 0.169642857 | 0.278915 |

|            |           |     |     |   |             |             |          |
|------------|-----------|-----|-----|---|-------------|-------------|----------|
| rs2254067  | C10orf18  | A/C | 10p | A | 0.160714286 | 0.200892857 | 0.279227 |
| rs6591518  |           | C/T | 11q | C | 0.089285714 | 0.120535714 | 0.279309 |
| rs2259633  |           | A/C | 11q | C | 0.231818182 | 0.191964286 | 0.279478 |
| rs2043289  |           | C/T | 19p | T | 0.058035714 | 0.081818182 | 0.279587 |
| rs960193   | OR8K3     | A/C | 11q | A | 0.288288288 | 0.339285714 | 0.279704 |
| rs2287749  | ADAM19    | C/T | 05q | T | 0.126126126 | 0.094594595 | 0.280231 |
| rs7101919  | OR52D1    | C/T | 11p | C | 0.258928571 | 0.306306306 | 0.280689 |
| rs3745105  |           | C/T | 19q | T | 0.383928571 | 0.4375      | 0.280855 |
| rs7764091  | KIAA1244  | G/T | 06q | G | 0.116071429 | 0.085585586 | 0.280984 |
| rs3803414  | MEGF11    | C/T | 15q | T | 0.0625      | 0.089285714 | 0.281143 |
| rs3752536  | ARHGAP18  | A/G | 06q | A | 0.114678899 | 0.148148148 | 0.281164 |
| rs1830080  | ZNF273    | C/T | 07q | T | 0.063636364 | 0.040178571 | 0.281246 |
| rs4813043  | DEFB128   | A/T | 20p | T | 0.419642857 | 0.370535714 | 0.281286 |
| rs10153004 | LOC390637 | C/T | 15q | T | 0.18018018  | 0.142857143 | 0.28166  |
| rs3735933  |           | A/G | 08p | G | 0.473214286 | 0.423423423 | 0.281768 |
| rs1784423  | MMP20     | C/T | 11q | T | 0.447368421 | 0.494845361 | 0.281971 |
| rs2641348  | ADAM30    | C/T | 01p | C | 0.089285714 | 0.120535714 | 0.282044 |
| rs2496253  |           | C/G | 01q | G | 0.454954955 | 0.490990991 | 0.282248 |
| rs2242139  |           | A/G | 12q | A | 0.45045045  | 0.401785714 | 0.282354 |
| rs6761641  |           | A/C | 02q | C | 0.081081081 | 0.111607143 | 0.282407 |
| rs878340   |           | A/G | 16p | G | 0.410714286 | 0.361607143 | 0.282576 |
| rs12186491 | SPINK6    | A/C | 05q | C | 0.125       | 0.094594595 | 0.28305  |
| rs7196346  |           | A/G | 16p | A | 0.236607143 | 0.196428571 | 0.283222 |
| rs2276568  | CAPN13    | A/G | 02p | G | 0.058035714 | 0.085585586 | 0.283277 |
| rs2295873  | TACC2     | C/T | 10q | C | 0.123853211 | 0.160550459 | 0.283296 |
| rs1860967  | A2ML1     | C/T | 12p | T | 0.366071429 | 0.415178571 | 0.283341 |
| rs4076221  | C6orf85   | C/T | 06p | C | 0.101851852 | 0.073394495 | 0.283568 |
| rs3117035  |           | A/G | 06p | A | 0.458333333 | 0.405660377 | 0.283611 |
| rs3789044  | LRRN2     | C/T | 01q | T | 0.196428571 | 0.236607143 | 0.283611 |
| rs6698159  | HBXIP     | A/G | 01p | A | 0.123853211 | 0.090909091 | 0.283634 |
| rs9826308  | CD200R1   | A/C | 03q | A | 0.436936937 | 0.486607143 | 0.283663 |
| rs4668909  | NAG       | C/T | 02p | T | 0.316964286 | 0.366071429 | 0.28415  |
| rs3865452  | ADCK4     | C/T | 19q | T | 0.444444444 | 0.490740741 | 0.284236 |
| rs245881   | CPVL      | A/G | 07p | A | 0.183035714 | 0.223214286 | 0.28426  |
| rs436556   |           | A/C | 06p | C | 0.159090909 | 0.199074074 | 0.28446  |
| rs1056787  | CENPC1    | A/G | 04q | A | 0.058035714 | 0.084821429 | 0.284479 |
| rs10256981 |           | C/G | 07p | C | 0.441441441 | 0.495535714 | 0.28457  |

|            |               |     |     |   |             |             |          |
|------------|---------------|-----|-----|---|-------------|-------------|----------|
| rs7975069  | ZNF268        | C/T | 12q | T | 0.303571429 | 0.348214286 | 0.284653 |
| rs1042714  | ADRB2         | C/G | 05q | G | 0.422018349 | 0.472727273 | 0.284818 |
| rs1801131  | MTHFR         | A/C | 01p | C | 0.288288288 | 0.337837838 | 0.284887 |
| rs3733197  | BANK1         | A/G | 04q | A | 0.352678571 | 0.308035714 | 0.285087 |
| rs2074060  | ZNF772        | C/G | 19q | G | 0.357142857 | 0.40625     | 0.285166 |
| rs240768   | ASCC3         | C/T | 06q | C | 0.058558559 | 0.035714286 | 0.285323 |
| rs2075662  | COL15A1       | A/G | 09q | A | 0.154545454 | 0.121495327 | 0.285929 |
| rs10146906 | C14orf121     | A/C | 14q | A | 0.491071429 | 0.459459459 | 0.28604  |
| rs1003878  | C6orf10       | C/T | 06p | T | 0.205357143 | 0.245535714 | 0.286169 |
| rs9514373  |               | C/T | 13q | T | 0.28125     | 0.236607143 | 0.286252 |
| rs699512   | BLVRA         | A/G | 07p | G | 0.247706422 | 0.204545455 | 0.286278 |
| rs2307040  | CALU          | A/G | 07q | A | 0.428571429 | 0.379464286 | 0.286286 |
| rs1784424  | MMP20         | A/C | 11q | C | 0.446428571 | 0.5         | 0.286596 |
| rs1052763  | DGCR14, TSSK2 | C/T | 22q | T | 0.138392857 | 0.174311927 | 0.286671 |
| rs2294451  | GNG13, CHTF18 | C/T | 16p | T | 0.223214286 | 0.183035714 | 0.28677  |
| rs556669   | SYTL2         | A/G | 11q | A | 0.369369369 | 0.324324324 | 0.287116 |
| rs7545520  | IVL           | C/G | 01q | C | 0.117117117 | 0.085585586 | 0.287326 |
| rs4901000  |               | C/T | 14q | C | 0.125       | 0.09375     | 0.28733  |
| rs3752630  | TMEM116       | A/C | 12q | C | 0.131313131 | 0.170212766 | 0.287337 |
| rs5998267  | RP1-127L4.6   | A/G | 22q | G | 0.46875     | 0.419642857 | 0.287538 |
| rs2074284  |               | C/G | 17q | C | 0.3125      | 0.267857143 | 0.287545 |
| rs11276    | ART4          | A/G | 12p | A | 0.348214286 | 0.396396396 | 0.287829 |
| rs2303929  | SLC4A2        | A/G | 07q | A | 0.238738739 | 0.2         | 0.287839 |
| rs10160116 | ZNF438        | A/G | 10p | A | 0.424107143 | 0.376146789 | 0.287949 |
| rs3742926  | AKAP6         | C/T | 14q | T | 0.117117117 | 0.085585586 | 0.288083 |
| rs11106    | MKI67         | C/G | 10q | C | 0.455357143 | 0.495535714 | 0.288173 |
| rs1278926  |               | A/C | 14q | C | 0.339285714 | 0.388392857 | 0.288196 |
| rs3183702  |               | C/T | 17p | T | 0.318181818 | 0.366972477 | 0.288223 |
| rs11705926 | LOC344875     | C/G | 03p | G | 0.272321429 | 0.227678571 | 0.288371 |
| rs2075957  |               | A/G | 22q | A | 0.126126126 | 0.09375     | 0.288433 |
| rs3213758  | RPGRIP1L      | C/T | 16q | T | 0.073394495 | 0.049107143 | 0.288485 |
| rs6807963  |               | C/T | 03q | T | 0.25        | 0.209821429 | 0.288506 |
| rs6456811  | PGBD1         | C/G | 06p | G | 0.121621622 | 0.15625     | 0.288947 |
| rs3780574  | C9orf102      | A/T | 09q | A | 0.133928571 | 0.103603604 | 0.288987 |
| rs4789128  |               | C/T | 17q | T | 0.348214286 | 0.397321429 | 0.289257 |
| rs11037502 | OR51I2        | A/G | 11p | A | 0.159090909 | 0.118181818 | 0.289375 |
| rs8113645  | FUT6, PLAC2   | A/G | 19p | A | 0.396396396 | 0.346846847 | 0.289511 |

|            |                |     |     |   |             |             |          |
|------------|----------------|-----|-----|---|-------------|-------------|----------|
| rs12019228 |                | A/G | 03p | A | 0.40860215  | 0.356382979 | 0.28968  |
| rs3795590  |                | A/G | 01q | A | 0.389908257 | 0.432432432 | 0.289765 |
| rs9646748  | FLJ20160       | A/G | 02q | G | 0.477678571 | 0.431818182 | 0.289864 |
| rs8030198  |                | A/G | 15q | A | 0.276785714 | 0.232142857 | 0.289925 |
| rs2273551  |                | C/T | 11p | T | 0.211538462 | 0.172897196 | 0.290088 |
| rs848208   | SPEN           | C/T | 01p | T | 0.089285714 | 0.0625      | 0.290482 |
| rs4691896  | LOC92345       | C/T | 04q | T | 0.213636364 | 0.254464286 | 0.290483 |
| rs1138294  | MAP3K6         | C/T | 01p | T | 0.308035714 | 0.351851852 | 0.290676 |
| rs755617   |                | A/C | 06q | A | 0.495535714 | 0.445945946 | 0.290716 |
| rs6833311  |                | A/G | 04q | A | 0.4         | 0.446428571 | 0.290868 |
| rs130068   | CCHCR1         | C/T | 06p | C | 0.459821429 | 0.486486486 | 0.290996 |
| rs641153   | CFB            | C/T | 06p | T | 0.107142857 | 0.077272727 | 0.291019 |
| rs10896659 | OR4A16         | A/T | 11q | T | 0.486607143 | 0.464285714 | 0.291413 |
| rs9868985  | CEP63          | C/T | 03q | T | 0.325892857 | 0.375       | 0.29182  |
| rs1041316  | C14orf101      | C/T | 14q | C | 0.238317757 | 0.287128713 | 0.291888 |
| rs2865121  |                | A/G | 18p | A | 0.241071429 | 0.285714286 | 0.292312 |
| rs1943330  | CDH20          | A/C | 18q | A | 0.120535714 | 0.15625     | 0.292326 |
| rs3740447  | KIAA1274       | A/G | 10q | A | 0.205357143 | 0.165178571 | 0.292344 |
| rs3737002  | CR1            | C/T | 01q | T | 0.22972973  | 0.1875      | 0.292357 |
| rs4884021  | LMO7           | A/G | 13q | A | 0.1875      | 0.148648649 | 0.292435 |
| rs13045    | EIF2AK3        | A/G | 02p | A | 0.325892857 | 0.370535714 | 0.292524 |
| rs3214045  | CEP135         | A/C | 04q | C | 0.22815534  | 0.276190476 | 0.292593 |
| rs3732413  | CDGAP          | A/G | 03q | G | 0.276785714 | 0.232142857 | 0.292603 |
| rs1799999  | PPP1R3A        | G/T | 07q | T | 0.104545455 | 0.075892857 | 0.292699 |
| rs10750931 | MS4A4A         | A/G | 11q | G | 0.142857143 | 0.178571429 | 0.292786 |
| rs10120379 |                | A/G | 09p | G | 0.339449541 | 0.388888889 | 0.293063 |
| rs10853751 | BCKDHA, EXOSC5 | C/T | 19q | C | 0.401785714 | 0.352678571 | 0.293124 |
| rs7531852  |                | C/T | 01q | C | 0.259090909 | 0.303571429 | 0.293766 |
| rs312959   |                | C/G | 02p | G | 0.346846847 | 0.397321429 | 0.294507 |
| rs7774557  |                | A/G | 06p | A | 0.108108108 | 0.080357143 | 0.294597 |
| rs1402954  | FBXO3          | C/T | 11p | T | 0.126126126 | 0.095454546 | 0.294816 |
| rs8111172  |                | C/T | 19p | C | 0.063063063 | 0.090909091 | 0.295273 |
| rs629001   | MYBPHL         | A/G | 01p | G | 0.066964286 | 0.044642857 | 0.295346 |
| rs6532289  | LOC728394      | C/T | 04q | C | 0.3125      | 0.267857143 | 0.295386 |
| rs3762827  | LOC728394      | A/G | 04q | G | 0.3125      | 0.267857143 | 0.295386 |
| rs10774304 | LOC387826      | G/T | 12p | G | 0.133928571 | 0.169642857 | 0.295767 |
| rs11771702 |                | C/G | 07q | G | 0.107142857 | 0.13963964  | 0.29605  |



|            |               |     |     |   |             |             |          |
|------------|---------------|-----|-----|---|-------------|-------------|----------|
| rs2291498  | C3orf63       | A/G | 03p | G | 0.075892857 | 0.103603604 | 0.296232 |
| rs549990   | PUS3, HYLS1   | A/C | 11q | C | 0.361111111 | 0.310185185 | 0.296257 |
| rs3750425  | TRPM6         | C/T | 09q | T | 0.089285714 | 0.063063063 | 0.296409 |
| rs2425817  | LOC728443     | A/G | 20q | A | 0.472972973 | 0.418918919 | 0.29646  |
| rs1990828  | C12orf63      | A/G | 12q | G | 0.151785714 | 0.1875      | 0.296731 |
| rs304029   | ITPR1         | A/C | 03p | C | 0.388392857 | 0.34375     | 0.296989 |
| rs11628722 | SERPINA9      | A/G | 14q | A | 0.178571429 | 0.218181818 | 0.297114 |
| rs3732581  | PARL          | C/G | 03q | C | 0.477678571 | 0.472972973 | 0.297129 |
| rs4482093  | PTPRQ         | C/T | 12q | C | 0.196428571 | 0.15625     | 0.297868 |
| rs7426114  | NEB           | C/T | 02q | C | 0.147321429 | 0.183035714 | 0.29835  |
| rs2271979  | CCDC41        | C/T | 12q | T | 0.066964286 | 0.09375     | 0.29836  |
| rs8042362  |               | A/G | 15q | G | 0.169642857 | 0.209821429 | 0.298602 |
| rs2511188  | USP35         | C/T | 11q | C | 0.207207207 | 0.25        | 0.29871  |
| rs1042984  | TBRG4         | A/G | 07p | A | 0.0625      | 0.04054054  | 0.298853 |
| rs4857302  | DKFZp667G2110 | A/C | 03q | C | 0.477678571 | 0.473214286 | 0.29897  |
| rs1061159  | C10orf118     | C/T | 10q | T | 0.276785714 | 0.234234234 | 0.298979 |
| rs2738935  |               | C/T | 21q | C | 0.101851852 | 0.069444444 | 0.299398 |
| rs887096   |               | C/G | 16p | C | 0.379464286 | 0.330357143 | 0.299518 |
| rs42664    | GTPBP10       | A/G | 07q | A | 0.441441441 | 0.491071429 | 0.29957  |
| rs1041973  | IL1RL1        | A/C | 02q | A | 0.27184466  | 0.227272727 | 0.299825 |
| rs3087689  | KRI1          | A/G | 19p | G | 0.238738739 | 0.200892857 | 0.299865 |
| rs11171467 | OR6C2         | C/T | 12q | C | 0.169642857 | 0.135135135 | 0.300022 |
| rs529038   | ROS1          | A/G | 06q | A | 0.254716981 | 0.209677419 | 0.300082 |
| rs2931403  | EFHB          | C/T | 03p | C | 0.31981982  | 0.266055046 | 0.300231 |
| rs1055851  | ERO1LB        | C/G | 01q | C | 0.352678571 | 0.4         | 0.300358 |
| rs4465020  | ANKRD15       | C/G | 09p | C | 0.369369369 | 0.419642857 | 0.300458 |
| rs6501755  |               | C/T | 17q | T | 0.348214286 | 0.396396396 | 0.300557 |
| rs248248   | LOC51149      | C/T | 05q | T | 0.3125      | 0.267857143 | 0.300605 |
| rs7258833  | LOC400696     | A/G | 19q | G | 0.357142857 | 0.310810811 | 0.30066  |
| rs3172494  | IHPK2         | A/C | 03p | A | 0.129464286 | 0.165178571 | 0.30074  |
| rs931605   | FRAS1         | A/T | 04q | T | 0.159090909 | 0.195454546 | 0.300893 |
| rs2508129  |               | A/C | 22q | C | 0.276785714 | 0.310810811 | 0.300982 |
| rs3735422  | C7orf16       | C/G | 07p | C | 0.129464286 | 0.098214286 | 0.301082 |
| rs5761268  | MYO18B        | A/C | 22q | C | 0.287878788 | 0.334862385 | 0.301205 |
| rs2255317  | MATN2         | A/G | 08q | A | 0.174107143 | 0.138392857 | 0.301231 |
| rs208696   | SASH1         | A/G | 06q | A | 0.392857143 | 0.34375     | 0.301239 |
| rs10896957 |               | A/G | 11q | G | 0.133928571 | 0.102678571 | 0.301348 |

|            |                      |     |     |   |             |             |          |
|------------|----------------------|-----|-----|---|-------------|-------------|----------|
| rs10769086 | OR52B6               | A/G | 11p | G | 0.232142857 | 0.272321429 | 0.301721 |
| rs7957619  | MVK                  | A/G | 12q | A | 0.15625     | 0.122727273 | 0.301943 |
| rs10837771 | OR51B4               | A/G | 11p | G | 0.477477478 | 0.426605505 | 0.302425 |
| rs7683838  | ATP10D               | C/T | 04p | C | 0.148648649 | 0.115740741 | 0.302602 |
| rs4280164  | C14orf21             | A/G | 14q | A | 0.214285714 | 0.178571429 | 0.302709 |
| rs4801433  | ZIM3                 | C/T | 19q | T | 0.433035714 | 0.482142857 | 0.302786 |
| rs6571751  | RPGRIP1              | A/G | 14q | A | 0.481981982 | 0.468468468 | 0.303042 |
| rs292592   | WDR91                | A/G | 07q | G | 0.276785714 | 0.232142857 | 0.303565 |
| rs2293177  | DENND2A              | A/G | 07q | A | 0.346846847 | 0.303571429 | 0.303701 |
| rs7873960  |                      | A/G | 09q | G | 0.342342342 | 0.294642857 | 0.304267 |
| rs1047437  | CCDC100              | C/G | 05q | C | 0.129464286 | 0.162162162 | 0.304278 |
| rs12119836 | OR2L13               | A/G | 01q | G | 0.371559633 | 0.319444444 | 0.304361 |
| rs1051168  | NMB                  | A/C | 15q | A | 0.323809524 | 0.276190476 | 0.305374 |
| rs3762923  | SORBS2               | G/T | 04q | T | 0.098214286 | 0.071428571 | 0.305386 |
| rs1054986  |                      | A/G | 18q | G | 0.495535714 | 0.454954955 | 0.305403 |
| rs7647507  | LOC729756, LOC729763 | A/G | 03p | G | 0.129807692 | 0.166666667 | 0.305576 |
| rs2257401  | CYP3A7               | C/G | 07q | C | 0.075892857 | 0.102678571 | 0.305728 |
| rs4969259  |                      | C/T | 17q | T | 0.472972973 | 0.477678571 | 0.30573  |
| rs2960306  | GRK4                 | G/T | 04p | T | 0.40625     | 0.357142857 | 0.305807 |
| rs2217657  | OR7G1                | C/G | 19p | C | 0.376146789 | 0.333333333 | 0.305975 |
| rs17611    | C5                   | A/G | 09q | A | 0.459459459 | 0.413636364 | 0.306052 |
| rs2302445  | NOM1                 | C/T | 07q | C | 0.491071429 | 0.459821429 | 0.306053 |
| rs3776096  | PCDHB6               | C/T | 05q | T | 0.21875     | 0.261261261 | 0.306245 |
| rs7297606  | KIAA1853             | A/G | 12q | A | 0.072072072 | 0.1         | 0.306519 |
| rs4129190  | THNSL2               | A/G | 02p | G | 0.165137615 | 0.12962963  | 0.306775 |
| rs2191379  | KRTAP9-4             | G/T | 17q | G | 0.310810811 | 0.267857143 | 0.306819 |
| rs11040984 | GVIN1                | C/T | 11p | C | 0.160714286 | 0.198198198 | 0.306848 |
| rs1133618  | FKBP15               | A/G | 09q | A | 0.202702703 | 0.245535714 | 0.306867 |
| rs3829868  | CRNN                 | C/T | 01q | T | 0.174311927 | 0.138392857 | 0.306989 |
| rs3796129  | RNF168               | G/T | 03q | G | 0.342342342 | 0.388392857 | 0.307044 |
| rs726817   | C10orf4              | C/T | 10q | C | 0.247747748 | 0.288990826 | 0.307153 |
| rs242018   | EFCAB4B              | A/G | 12p | A | 0.310185185 | 0.264705882 | 0.307166 |
| rs278562   |                      | A/G | 08q | A | 0.482142857 | 0.4375      | 0.307204 |
| rs231678   | OR3A4                | G/T | 17p | G | 0.401785714 | 0.446428571 | 0.307319 |
| rs10078759 | FLJ90650             | C/G | 05q | G | 0.18018018  | 0.144144144 | 0.307525 |
| rs6442089  | MAP4                 | C/T | 03p | T | 0.348214286 | 0.392857143 | 0.307568 |
| rs4804063  | FBN3                 | C/T | 19p | C | 0.207207207 | 0.169642857 | 0.307889 |

|            |                |     |     |   |             |             |          |
|------------|----------------|-----|-----|---|-------------|-------------|----------|
| rs2108485  | SNED1          | G/T | 02q | T | 0.129464286 | 0.165178571 | 0.308117 |
| rs486907   | RNASEL         | A/G | 01q | A | 0.379464286 | 0.334821429 | 0.308152 |
| rs6584356  | PKD2L1         | A/C | 10q | A | 0.063063063 | 0.04054054  | 0.308452 |
| rs231231   | SNX26          | A/G | 19q | G | 0.369369369 | 0.325892857 | 0.308622 |
| rs7298766  | B4GALNT3       | A/G | 12p | G | 0.348214286 | 0.303571429 | 0.308649 |
| rs2289189  | RAB3GAP2       | C/G | 01q | G | 0.085585586 | 0.116071429 | 0.308683 |
| rs3130062  | NFKBIL1        | C/T | 06p | C | 0.080357143 | 0.058035714 | 0.308684 |
| rs4665809  | LOC391358      | A/G | 02p | A | 0.200892857 | 0.241071429 | 0.309117 |
| rs11057353 | DNAH10         | C/T | 12q | T | 0.450892857 | 0.404545455 | 0.309206 |
| rs25692    | TMEM2          | C/T | 09q | T | 0.133928571 | 0.169642857 | 0.309469 |
| rs7587534  |                | A/G | 02q | G | 0.0625      | 0.040909091 | 0.309505 |
| rs11264300 | DCST1          | A/C | 01q | C | 0.334821429 | 0.290178571 | 0.30956  |
| rs7038903  | SVEP1          | C/T | 09q | C | 0.147321429 | 0.178571429 | 0.309635 |
| rs10948132 | SPATS1         | A/G | 06p | A | 0.256756757 | 0.299107143 | 0.309659 |
| rs880303   | GJA10          | C/T | 01p | T | 0.477678571 | 0.472972973 | 0.3097   |
| rs3929715  |                | C/T | 14q | T | 0.09375     | 0.068807339 | 0.309856 |
| rs449996   |                | C/T | 18p | C | 0.446428571 | 0.397321429 | 0.309915 |
| rs2570573  | OR51A4, OR51A2 | A/C | 11p | A | 0.292792793 | 0.330357143 | 0.309942 |
| rs611251   | PPP1R15A       | A/G | 19q | G | 0.18018018  | 0.21875     | 0.310118 |
| rs12420456 | SLC22A20       | C/T | 11q | T | 0.316964286 | 0.36036036  | 0.310397 |
| rs886354   | NPVF           | C/G | 07p | C | 0.068807339 | 0.044642857 | 0.310426 |
| rs414352   | RP1            | C/T | 08q | C | 0.268181818 | 0.227678571 | 0.310447 |
| rs2297781  | QSER1          | A/G | 11p | G | 0.089285714 | 0.0625      | 0.310709 |
| rs2682484  | KLRA1          | A/T | 12p | A | 0.162162162 | 0.200892857 | 0.310986 |
| rs3765620  | MMP8           | A/G | 11q | G | 0.480952381 | 0.434782609 | 0.311002 |
| rs708776   | ITPKB          | A/C | 01q | C | 0.053571429 | 0.076576577 | 0.311248 |
| rs3759601  | ATG2B          | C/G | 14q | G | 0.390909091 | 0.436936937 | 0.311638 |
| rs3806589  | DKFZp762E1312  | A/G | 02q | A | 0.363636364 | 0.40990991  | 0.312081 |
| rs6691216  | DENND1B        | C/T | 01q | C | 0.45412844  | 0.495098039 | 0.31268  |
| rs6836994  | ANXA10         | A/C | 04q | A | 0.46875     | 0.423423423 | 0.31274  |
| rs12113440 |                | C/T | 07q | C | 0.107142857 | 0.138392857 | 0.312921 |
| rs6007594  | FAM118A        | A/G | 22q | A | 0.334821429 | 0.288288288 | 0.31293  |
| rs364891   | RNF144A        | A/G | 02p | A | 0.227678571 | 0.189189189 | 0.312987 |
| rs3816665  | LAMA2          | C/T | 06q | T | 0.120535714 | 0.15625     | 0.313219 |
| rs10864198 | USH2A          | G/T | 01q | T | 0.47706422  | 0.472972973 | 0.313238 |
| rs1405069  | PI16           | G/T | 06p | G | 0.427884615 | 0.471428571 | 0.313435 |
| rs9883988  | FLJ35880       | A/G | 03q | A | 0.054054054 | 0.080357143 | 0.313437 |

|            |                       |     |     |   |             |             |          |
|------------|-----------------------|-----|-----|---|-------------|-------------|----------|
| rs6664593  | A3GALT2               | C/T | 01p | T | 0.352678571 | 0.308035714 | 0.313562 |
| rs2792751  | GPAM                  | A/G | 10q | A | 0.351351351 | 0.309090909 | 0.313569 |
| rs9300759  | LOC643677             | G/T | 13q | G | 0.240909091 | 0.202702703 | 0.313689 |
| rs1805087  | MTR                   | A/G | 01q | G | 0.227678571 | 0.189189189 | 0.313818 |
| rs2075113  |                       | A/T | 16p | A | 0.366071429 | 0.334821429 | 0.313931 |
| rs9436     | PELP1                 | A/T | 17p | T | 0.268518519 | 0.222727273 | 0.313942 |
| rs2586012  | LOC133185             | C/T | 04p | T | 0.200892857 | 0.162162162 | 0.314086 |
| rs1045537  | HFE                   | C/G | 06p | C | 0.1         | 0.130630631 | 0.31426  |
| rs1678536  |                       | C/G | 12q | G | 0.240909091 | 0.283653846 | 0.314473 |
| rs2201647  |                       | A/G | 19q | A | 0.396396396 | 0.441964286 | 0.314579 |
| rs7637099  | GLB1, FLJ45032        | A/G | 03p | G | 0.378378378 | 0.333333333 | 0.314677 |
| rs2124920  | C19orf16              | C/T | 19q | T | 0.0625      | 0.089285714 | 0.314753 |
| rs1342642  | IL20RA                | C/T | 06q | T | 0.22972973  | 0.268181818 | 0.314764 |
| rs15783    | TMEM16C, MUC15        | A/G | 11p | G | 0.369158879 | 0.323232323 | 0.314796 |
| rs11648228 | LOC92017, hCG_1983896 | G/T | 16p | T | 0.183035714 | 0.21875     | 0.315526 |
| rs7988277  | ZMYM5                 | C/T | 13q | T | 0.080357143 | 0.108108108 | 0.315686 |
| rs7190823  | FANCA                 | C/T | 16q | C | 0.357142857 | 0.407407407 | 0.315776 |
| rs8178017  | PRKDC                 | A/G | 08q | A | 0.071428571 | 0.049107143 | 0.31584  |
| rs9461102  |                       | C/G | 06p | G | 0.107142857 | 0.080357143 | 0.315892 |
| rs4606855  | EMR3                  | C/G | 19p | C | 0.285714286 | 0.243243243 | 0.316077 |
| rs11778385 |                       | A/G | 08q | G | 0.391891892 | 0.346846847 | 0.316106 |
| rs1559155  | PPFIA3                | C/T | 19q | C | 0.37962963  | 0.333333333 | 0.316179 |
| rs2074718  | ZNF596                | A/C | 08p | A | 0.063063063 | 0.089285714 | 0.317044 |
| rs2073380  | PCNT                  | A/C | 21q | C | 0.234234234 | 0.276785714 | 0.317051 |
| rs2696923  | TRIM49, LOC283116     | C/T | 11p | T | 0.165178571 | 0.200892857 | 0.317074 |
| rs2442638  | PDE4DIP               | C/T | 01q | C | 0.236607143 | 0.27027027  | 0.317115 |
| rs7632885  | CLSTN2                | A/G | 03q | G | 0.364864865 | 0.412037037 | 0.317121 |
| rs2551949  | FAM119A               | C/T | 02q | C | 0.205357143 | 0.169642857 | 0.317196 |
| rs1353776  | AMOTL2                | C/G | 03q | G | 0.357142857 | 0.313636364 | 0.317415 |
| rs4832524  | KCNS3                 | A/G | 02p | A | 0.383928571 | 0.337837838 | 0.317864 |
| rs11074981 |                       | C/G | 16p | C | 0.477678571 | 0.428571429 | 0.318035 |
| rs2980619  | NUDCD1                | G/T | 08q | T | 0.431818182 | 0.477477478 | 0.318093 |
| rs1470414  | PASK                  | A/G | 02q | A | 0.392857143 | 0.346846847 | 0.318488 |
| rs12678688 |                       | G/T | 08q | G | 0.09375     | 0.122727273 | 0.319057 |
| rs636736   |                       | C/T | 11q | C | 0.18018018  | 0.218181818 | 0.319165 |
| rs3742591  | KIAA0423              | C/G | 14q | C | 0.075892857 | 0.054545454 | 0.319584 |
| rs455863   | IL17RE                | A/G | 03p | G | 0.477678571 | 0.477477478 | 0.319908 |

|            |              |     |     |   |             |             |          |
|------------|--------------|-----|-----|---|-------------|-------------|----------|
| rs11074974 |              | A/G | 16p | A | 0.294642857 | 0.339285714 | 0.320036 |
| rs10925035 |              | A/G | 01q | G | 0.095454546 | 0.064814815 | 0.320332 |
| rs3812629  | SYNPO2L      | A/G | 10q | A | 0.169642857 | 0.136363636 | 0.320565 |
| rs4646750  | ALDH1L1      | A/G | 03q | G | 0.075892857 | 0.102678571 | 0.320703 |
| rs2288073  | FLJ30851     | A/G | 02p | G | 0.3125      | 0.355855856 | 0.320739 |
| rs4987310  | SELL         | C/T | 01q | T | 0.15625     | 0.125       | 0.32074  |
| rs803064   | CUTL1        | C/T | 07q | C | 0.382882883 | 0.425925926 | 0.320809 |
| rs7224496  | SMYD4        | A/C | 17p | A | 0.490909091 | 0.443925234 | 0.320838 |
| rs4236480  | TRPV5        | A/G | 07q | A | 0.216981132 | 0.25462963  | 0.320906 |
| rs9667042  |              | A/T | 11q | A | 0.258928571 | 0.292792793 | 0.320917 |
| rs6670984  | ANKRD35      | C/T | 01q | T | 0.342592593 | 0.386363636 | 0.321201 |
| rs10818504 | CEP110       | C/T | 09q | T | 0.441964286 | 0.397321429 | 0.321524 |
| rs2022028  |              | A/G | 01p | A | 0.423423423 | 0.377272727 | 0.321656 |
| rs1142057  | C1orf201     | A/G | 01p | G | 0.330357143 | 0.379464286 | 0.32176  |
| rs1801591  | ETFA         | C/T | 15q | T | 0.085585586 | 0.116071429 | 0.321865 |
| rs6724782  | ALMS1        | A/T | 02p | A | 0.283018868 | 0.242857143 | 0.322057 |
| rs6465353  |              | G/T | 07q | G | 0.413636364 | 0.366071429 | 0.322255 |
| rs800667   | CYP3A43      | A/G | 07q | G | 0.076576577 | 0.102678571 | 0.322512 |
| rs2019552  |              | C/G | 16q | C | 0.183035714 | 0.220183486 | 0.322566 |
| rs2973571  | RGNEF        | A/G | 05q | A | 0.310810811 | 0.265765766 | 0.322662 |
| rs2274328  | CA6          | A/C | 01p | C | 0.482142857 | 0.433035714 | 0.322792 |
| rs1042589  | TPO          | C/G | 02p | G | 0.450892857 | 0.5         | 0.323041 |
| rs1042337  | HLA-DMB      | C/T | 06p | C | 0.240566038 | 0.200934579 | 0.32336  |
| rs7572174  |              | C/G | 02p | C | 0.279279279 | 0.240909091 | 0.323374 |
| rs1422795  | ADAM19       | A/G | 05q | G | 0.370535714 | 0.328828829 | 0.323945 |
| rs2301641  | ABCB5        | A/G | 07p | G | 0.287037037 | 0.331775701 | 0.324255 |
| rs10972048 |              | C/T | 09p | T | 0.348214286 | 0.392857143 | 0.324375 |
| rs7601049  | VWA3B        | C/G | 02q | C | 0.379464286 | 0.424107143 | 0.32455  |
| rs3126066  | FLG          | A/G | 01q | G | 0.188073395 | 0.153153153 | 0.324679 |
| rs6762208  | SENP2        | A/C | 03q | A | 0.346846847 | 0.391891892 | 0.324751 |
| rs1467558  | CD44         | A/G | 11p | A | 0.140776699 | 0.108910891 | 0.324985 |
| rs6465111  |              | A/G | 07q | A | 0.423423423 | 0.472727273 | 0.325128 |
| rs7291444  | PKDREJ       | G/T | 22q | G | 0.135135135 | 0.169642857 | 0.325145 |
| rs12523992 | RP11-145H9.1 | A/G | 06p | A | 0.177884615 | 0.141414141 | 0.325224 |
| rs1363558  |              | A/T | 05q | A | 0.433035714 | 0.388392857 | 0.325234 |
| rs10234545 |              | C/T | 07p | C | 0.080357143 | 0.108108108 | 0.325282 |
| rs1053593  | HMG2L1       | G/T | 22q | G | 0.334862385 | 0.294392523 | 0.32547  |

|            |           |     |     |   |             |             |          |
|------------|-----------|-----|-----|---|-------------|-------------|----------|
| rs721917   | SFTPD     | C/T | 10q | C | 0.382882883 | 0.428571429 | 0.326017 |
| rs7222402  | GAS7      | C/T | 17p | C | 0.361607143 | 0.405405405 | 0.326309 |
| rs7971073  | OR6C65    | A/G | 12q | A | 0.171171171 | 0.138392857 | 0.326615 |
| rs10787428 | GPAM      | C/T | 10q | T | 0.477678571 | 0.433035714 | 0.32674  |
| rs2179129  | ZNRF3     | A/G | 22q | G | 0.46875     | 0.424107143 | 0.326839 |
| rs7095762  | C10orf118 | G/T | 10q | T | 0.274774775 | 0.234234234 | 0.326989 |
| rs214803   | TGM3      | G/T | 20p | G | 0.227678571 | 0.1875      | 0.327149 |
| rs381583   | ATP11A    | A/G | 13q | G | 0.450892857 | 0.495535714 | 0.327228 |
| rs10415312 | OR7C1     | C/T | 19p | C | 0.116071429 | 0.084821429 | 0.327401 |
| rs1805017  | PLA2G7    | A/G | 06p | A | 0.238738739 | 0.200892857 | 0.327543 |
| rs2302515  | APOBEC1   | C/G | 12p | C | 0.111607143 | 0.084821429 | 0.327639 |
| rs3769148  | ZAK       | A/G | 02q | G | 0.450892857 | 0.5         | 0.327842 |
| rs1498486  | OR5111    | A/C | 11p | C | 0.463963964 | 0.422727273 | 0.328    |
| rs3740015  | DHTKD1    | G/T | 10p | T | 0.432432432 | 0.388392857 | 0.328142 |
| rs2275272  | ALDH18A1  | A/G | 10q | A | 0.071428571 | 0.096330275 | 0.328324 |
| rs2468774  | MRGPRX4   | C/G | 11p | C | 0.25        | 0.288288288 | 0.328394 |
| rs1807142  |           | C/T | 06p | T | 0.089285714 | 0.066964286 | 0.32862  |
| rs3811128  | LOC402382 | C/G | 09q | C | 0.148648649 | 0.118181818 | 0.32876  |
| rs4916685  | GPR98     | C/T | 05q | T | 0.359090909 | 0.410714286 | 0.328908 |
| rs11137410 | PNPLA7    | C/T | 09q | T | 0.102803738 | 0.075757576 | 0.329158 |
| rs1893963  | DSC2      | A/G | 18q | G | 0.120535714 | 0.09375     | 0.329408 |
| rs243904   | C20orf82  | A/G | 20p | G | 0.102678571 | 0.075892857 | 0.32956  |
| rs10401084 |           | A/T | 18q | A | 0.076576577 | 0.102803738 | 0.32961  |
| rs2993431  |           | C/G | 01q | C | 0.160714286 | 0.196428571 | 0.329911 |
| rs7252632  | ZIM3      | C/T | 19q | T | 0.366071429 | 0.40990991  | 0.330176 |
| rs312960   |           | A/C | 02p | C | 0.050925926 | 0.032407407 | 0.330218 |
| rs998147   | SYNE1     | C/T | 06q | T | 0.15625     | 0.191964286 | 0.330302 |
| rs1558878  | ARSG      | C/T | 17q | T | 0.45        | 0.5         | 0.330368 |
| rs10894799 | LOC89944  | C/T | 11q | C | 0.433035714 | 0.387387387 | 0.330469 |
| rs863363   | OR10X1    | A/G | 01q | G | 0.445945946 | 0.490909091 | 0.330577 |
| rs1438307  | UBXD2     | A/C | 02q | C | 0.285714286 | 0.330357143 | 0.331165 |
| rs706762   | C19orf42  | C/T | 19p | T | 0.102678571 | 0.075892857 | 0.331168 |
| rs7490338  |           | G/T | 13q | T | 0.214285714 | 0.177419355 | 0.331426 |
| rs2271570  | C4orf33   | C/T | 04q | T | 0.105504587 | 0.136792453 | 0.331465 |
| rs1687692  |           | C/T | 11q | T | 0.144144144 | 0.175675676 | 0.331643 |
| rs2853083  | OR5AK2    | A/G | 11q | G | 0.387387387 | 0.340909091 | 0.331849 |
| rs1681723  |           | A/G | 10q | A | 0.495495496 | 0.459821429 | 0.331886 |

|            |              |     |     |   |             |             |          |
|------------|--------------|-----|-----|---|-------------|-------------|----------|
| rs3751107  | MLPH         | C/T | 02q | T | 0.144144144 | 0.178571429 | 0.331954 |
| rs2229333  | TGIF1        | C/T | 18p | T | 0.080357143 | 0.053571429 | 0.332042 |
| rs2052191  | ANKRD24      | A/G | 19p | A | 0.464285714 | 0.418918919 | 0.332224 |
| rs4752642  | TACC2        | A/G | 10q | A | 0.234234234 | 0.197247706 | 0.33238  |
| rs10760500 | SH2D3C       | A/G | 09q | G | 0.468468469 | 0.427272727 | 0.332401 |
| rs9915248  |              | C/T | 17p | C | 0.321100917 | 0.364864865 | 0.332491 |
| rs1958715  | OR4L1        | A/G | 14q | A | 0.424107143 | 0.473214286 | 0.332555 |
| rs2369679  | AK7          | C/G | 14q | C | 0.174107143 | 0.13963964  | 0.332574 |
| rs2118886  |              | A/G | 02q | G | 0.468468468 | 0.486363636 | 0.332601 |
| rs1991517  | TSHR         | C/G | 14q | G | 0.107142857 | 0.080357143 | 0.332671 |
| rs9935550  |              | C/T | 16p | T | 0.263392857 | 0.303571429 | 0.332725 |
| rs6722682  | C2orf3       | C/T | 02p | C | 0.129464286 | 0.165178571 | 0.332818 |
| rs6587625  | THEM5        | C/T | 01q | T | 0.227678571 | 0.268181818 | 0.332838 |
| rs3177244  |              | A/G | 22q | A | 0.125       | 0.094594595 | 0.332931 |
| rs4149117  | SLCO1B3      | G/T | 12p | T | 0.148648649 | 0.183035714 | 0.333376 |
| rs3807069  | ZNF117       | C/T | 07q | T | 0.348214286 | 0.392857143 | 0.333978 |
| rs6949056  | FAM137A      | C/T | 07q | T | 0.231818182 | 0.190909091 | 0.334283 |
| rs32854    | FLJ12331     | G/T | 16q | T | 0.4375      | 0.482142857 | 0.33455  |
| rs10186182 |              | A/G | 02p | A | 0.334821429 | 0.379464286 | 0.334562 |
| rs7949157  | FAT3         | A/G | 11q | A | 0.126126126 | 0.160550459 | 0.334589 |
| rs248040   |              | A/G | 05q | G | 0.486486486 | 0.468181818 | 0.334643 |
| rs2296947  |              | A/G | 09q | A | 0.405405405 | 0.446428571 | 0.334669 |
| rs12470151 |              | C/T | 02q | T | 0.388392857 | 0.34375     | 0.334676 |
| rs9933059  | LOC123855    | A/G | 16q | G | 0.238738739 | 0.276785714 | 0.334806 |
| rs2228526  | ERCC6        | A/G | 10q | G | 0.231818182 | 0.192307692 | 0.334852 |
| rs3763980  | SLC16A7      | A/T | 12q | A | 0.200892857 | 0.238738739 | 0.334993 |
| rs6976     | GNL3, GLT8D1 | C/T | 03p | T | 0.4375      | 0.390909091 | 0.335272 |
| rs725660   | LOC388553    | G/T | 19q | T | 0.340909091 | 0.299107143 | 0.335463 |
| rs514076   | SLC22A20     | C/G | 11q | C | 0.193693694 | 0.232142857 | 0.335467 |
| rs1216248  |              | A/G | 11q | G | 0.491071429 | 0.464285714 | 0.335631 |
| rs1051790  | MICA         | C/G | 06p | G | 0.163551402 | 0.198113208 | 0.335877 |
| rs1812805  |              | G/T | 05q | T | 0.313636364 | 0.27027027  | 0.336075 |
| rs361666   | SUHW1        | G/T | 22q | T | 0.217592593 | 0.25        | 0.336376 |
| rs2241493  | TRPM1        | C/T | 15q | C | 0.25        | 0.211711712 | 0.336417 |
| rs3819300  |              | C/G | 06p | G | 0.464285714 | 0.495535714 | 0.336519 |
| rs3911730  | RTTN         | A/C | 18q | A | 0.058035714 | 0.080357143 | 0.336585 |
| rs6854749  | AFF1         | A/T | 04q | T | 0.178571429 | 0.145454546 | 0.336613 |

|            |                   |     |     |   |             |             |          |
|------------|-------------------|-----|-----|---|-------------|-------------|----------|
| rs11574570 | LILRB4            | G/T | 19q | T | 0.191964286 | 0.159090909 | 0.336878 |
| rs4144738  | MLZE              | A/G | 08q | G | 0.482142857 | 0.4375      | 0.336964 |
| rs2302757  | CUL4A             | A/G | 13q | G | 0.243243243 | 0.209821429 | 0.337186 |
| rs3021496  | XKR6              | A/G | 08p | G | 0.053571429 | 0.075892857 | 0.33737  |
| rs11574576 | LILRB4            | A/G | 19q | G | 0.321428571 | 0.28125     | 0.337538 |
| rs7563754  | VIT               | A/G | 02p | A | 0.25        | 0.288990826 | 0.337548 |
| rs1050348  | LAMA4             | C/T | 06q | T | 0.339285714 | 0.382882883 | 0.337594 |
| rs1051792  | MICA              | A/G | 06p | A | 0.28125     | 0.321428571 | 0.337893 |
| rs10102194 |                   | G/T | 08q | T | 0.261261261 | 0.303571429 | 0.338021 |
| rs740182   |                   | A/G | 07p | A | 0.371559633 | 0.41588785  | 0.338065 |
| rs11649499 | SEZ6L2            | C/G | 16p | C | 0.147321429 | 0.117117117 | 0.338207 |
| rs709932   | SERPINA1          | A/G | 14q | A | 0.129464286 | 0.160714286 | 0.338334 |
| rs7969931  | LRMP              | C/G | 12p | C | 0.195454545 | 0.234234234 | 0.338583 |
| rs1563371  | ALKBH5            | A/G | 17p | A | 0.223214286 | 0.1875      | 0.338657 |
| rs606389   |                   | A/T | 20p | A | 0.459090909 | 0.418918919 | 0.338756 |
| rs12666726 |                   | A/T | 07p | A | 0.165178571 | 0.133928571 | 0.338981 |
| rs4237761  |                   | C/T | 11p | C | 0.178571429 | 0.216216216 | 0.339011 |
| rs2233914  | SLC31A1, FKBP15   | A/G | 09q | A | 0.089285714 | 0.116071429 | 0.339038 |
| rs737976   | THOC5             | C/T | 22q | C | 0.482142857 | 0.436936937 | 0.339233 |
| rs1035442  | MUC16             | C/G | 19p | G | 0.075892857 | 0.053571429 | 0.33959  |
| rs133335   | WBP2NL            | A/G | 22q | G | 0.428571429 | 0.472727273 | 0.339618 |
| rs2073201  | SGSM1             | A/G | 22q | A | 0.093137255 | 0.120192308 | 0.339819 |
| rs1826330  | HSP90AA2          | C/T | 11p | T | 0.122727273 | 0.151785714 | 0.339827 |
| rs4415893  |                   | C/T | 13q | T | 0.189814815 | 0.224770642 | 0.34003  |
| rs2292893  |                   | A/G | 03q | A | 0.459821429 | 0.414414414 | 0.340234 |
| rs3746726  | SSTR4             | G/T | 20p | G | 0.366071429 | 0.409090909 | 0.340371 |
| rs2305962  |                   | C/G | 05q | G | 0.263636364 | 0.304545455 | 0.34097  |
| rs1041951  | FECH              | C/T | 18q | T | 0.165178571 | 0.200892857 | 0.341333 |
| rs1054486  | MAN2B1            | C/G | 19p | G | 0.254464286 | 0.292792793 | 0.341416 |
| rs3824433  | JAK2              | C/T | 09p | T | 0.227678571 | 0.267857143 | 0.341493 |
| rs6863932  |                   | A/G | 05q | A | 0.422727273 | 0.375       | 0.341549 |
| rs7875285  |                   | C/T | 09p | C | 0.441964286 | 0.486486486 | 0.341748 |
| rs38794    | ANKIB1            | A/C | 07q | C | 0.477678571 | 0.428571429 | 0.3419   |
| rs9276814  |                   | A/G | 06p | A | 0.272321429 | 0.3125      | 0.341949 |
| rs220111   | UMODL1, C21orf128 | G/T | 21q | T | 0.339285714 | 0.379464286 | 0.342438 |
| rs9322965  | RPGRIP1           | A/G | 14q | A | 0.23853211  | 0.278301887 | 0.342517 |
| rs6958844  |                   | A/C | 07p | C | 0.080357143 | 0.107142857 | 0.342611 |



|            |                      |     |     |   |             |             |          |
|------------|----------------------|-----|-----|---|-------------|-------------|----------|
| rs10278576 |                      | A/G | 07p | A | 0.080357143 | 0.107142857 | 0.342611 |
| rs4818949  | C21orf29, KRTAP10-10 | A/C | 21q | C | 0.21875     | 0.25        | 0.342626 |
| rs1639122  | CHD4                 | A/C | 12p | A | 0.321428571 | 0.366071429 | 0.342667 |
| rs363125   | HD                   | G/T | 04p | T | 0.110091743 | 0.140909091 | 0.342707 |
| rs6038126  |                      | C/T | 20p | T | 0.468468469 | 0.424107143 | 0.342868 |
| rs6416547  | ABHD2                | G/T | 15q | G | 0.147321429 | 0.117117117 | 0.343072 |
| rs10030708 | TMPRSS11F            | C/T | 04q | T | 0.267857143 | 0.308035714 | 0.343229 |
| rs2273800  | WDR25                | C/T | 14q | T | 0.265765766 | 0.30733945  | 0.343269 |
| rs6782766  | DKFZp667G2110        | A/G | 03q | A | 0.486607143 | 0.46875     | 0.343414 |
| rs2275363  | RAP1GAP              | A/G | 01p | A | 0.454954955 | 0.410714286 | 0.344065 |
| rs4799570  | DSG4                 | A/C | 18q | A | 0.110091743 | 0.138392857 | 0.344295 |
| rs598318   |                      | C/T | 05p | C | 0.153153153 | 0.189189189 | 0.344572 |
| rs312966   |                      | C/T | 02p | C | 0.36036036  | 0.40625     | 0.344605 |
| rs409782   | RBM11                | G/T | 21q | T | 0.214285714 | 0.178571429 | 0.344628 |
| rs2302341  | CDC2L5               | A/G | 07p | A | 0.075892857 | 0.054054054 | 0.344751 |
| rs6786354  | DKFZp667G2110        | A/G | 03q | A | 0.486607143 | 0.468468468 | 0.344931 |
| rs12065526 | OR2B11               | A/G | 01q | A | 0.13963964  | 0.107142857 | 0.345124 |
| rs2071002  | NQO2                 | A/C | 06p | C | 0.348214286 | 0.308035714 | 0.34552  |
| rs4909396  | FLJ45872             | C/T | 08q | T | 0.419642857 | 0.375       | 0.345556 |
| rs1613662  | GP6                  | A/G | 19q | G | 0.142857143 | 0.174107143 | 0.345802 |
| rs2277680  | CXCL16               | A/G | 17p | A | 0.459821429 | 0.414414414 | 0.345804 |
| rs1536690  | ZNF169               | A/G | 09q | A | 0.15625     | 0.1875      | 0.345826 |
| rs2020860  | FMO2                 | C/T | 01q | C | 0.053571429 | 0.075892857 | 0.345843 |
| rs869378   |                      | A/G | 01q | A | 0.053571429 | 0.036036036 | 0.346182 |
| rs3733359  | GC                   | C/T | 04q | T | 0.058035714 | 0.080357143 | 0.346191 |
| rs2071240  | TCOF1                | C/G | 05q | C | 0.072072072 | 0.098214286 | 0.346292 |
| rs5997917  | LIMK2                | A/G | 22q | A | 0.116071429 | 0.089285714 | 0.346295 |
| rs4261431  |                      | C/T | 14q | C | 0.486607143 | 0.441964286 | 0.346717 |
| rs2233564  | OR2S2                | A/G | 09p | G | 0.351351351 | 0.306306306 | 0.346786 |
| rs11247226 | LINS1                | A/G | 15q | G | 0.495535714 | 0.450892857 | 0.346886 |
| rs7255438  |                      | C/T | 19q | T | 0.0625      | 0.084821429 | 0.347104 |
| rs3775739  | CSN3                 | C/T | 04q | T | 0.178571429 | 0.147321429 | 0.347106 |
| rs2709437  | FLJ41046             | C/T | 02p | C | 0.428571429 | 0.473214286 | 0.347123 |
| rs512110   | PRUNE2               | C/T | 09q | C | 0.1875      | 0.225225225 | 0.347458 |
| rs4801478  | ZNF548               | A/G | 19q | G | 0.0625      | 0.084821429 | 0.347488 |
| rs4318060  | OR6C3                | A/G | 12q | A | 0.169642857 | 0.138392857 | 0.347775 |
| rs7132600  | OR6C1                | C/T | 12q | T | 0.169642857 | 0.138392857 | 0.347775 |

|            |               |     |     |   |             |             |          |
|------------|---------------|-----|-----|---|-------------|-------------|----------|
| rs1296794  | CECR2         | C/T | 22q | T | 0.184684685 | 0.148148148 | 0.347849 |
| rs9306198  | BCL2L13       | C/T | 22q | T | 0.145454546 | 0.116071429 | 0.347852 |
| rs2464195  | HNF1A         | C/T | 12q | T | 0.415178571 | 0.369369369 | 0.347943 |
| rs3209441  | DOCK8         | A/G | 09p | A | 0.135135135 | 0.166666667 | 0.347958 |
| rs4729647  | MUC17         | C/T | 07q | T | 0.084821429 | 0.111607143 | 0.348252 |
| rs12210441 |               | A/G | 06q | A | 0.308035714 | 0.267857143 | 0.348325 |
| rs6869849  | PDZD2         | C/T | 05p | T | 0.356481482 | 0.315533981 | 0.348629 |
| rs11152199 |               | A/C | 18q | A | 0.225225225 | 0.263888889 | 0.348707 |
| rs4658360  | GBP6          | C/T | 01p | C | 0.25        | 0.288461538 | 0.348827 |
| rs6519993  | PKDREJ        | A/G | 22q | G | 0.138392857 | 0.171171171 | 0.349102 |
| rs6748672  | MCEE          | A/C | 02p | A | 0.175675676 | 0.142857143 | 0.34913  |
| rs2271904  | ECD           | C/T | 10q | C | 0.080357143 | 0.058035714 | 0.34913  |
| rs6924078  | LOC389365     | A/G | 06p | A | 0.27027027  | 0.232142857 | 0.349155 |
| rs886424   |               | A/G | 06p | A | 0.081081081 | 0.107142857 | 0.34923  |
| rs2001079  |               | C/T | 22q | C | 0.3125      | 0.272321429 | 0.349246 |
| rs11033233 |               | G/T | 11p | G | 0.359090909 | 0.400900901 | 0.349387 |
| rs2275689  | HEATR1        | C/T | 01q | T | 0.267857143 | 0.303571429 | 0.349482 |
| rs3746583  | C20orf119     | C/G | 20q | C | 0.063063063 | 0.044642857 | 0.349536 |
| rs1799990  | PRNP          | A/G | 20p | G | 0.311926606 | 0.271028037 | 0.349536 |
| rs1816774  |               | A/C | 11p | A | 0.427272727 | 0.382882883 | 0.349617 |
| rs1326331  | EXOC6         | C/T | 10q | C | 0.308035714 | 0.267857143 | 0.349819 |
| rs3777134  | SPINK5        | C/T | 05q | C | 0.397321429 | 0.357142857 | 0.350073 |
| rs7918621  |               | A/G | 10p | G | 0.267857143 | 0.308035714 | 0.350188 |
| rs1395268  | SERPINB11     | A/C | 18q | A | 0.178571429 | 0.148648649 | 0.350201 |
| rs2276774  | SEMA5B        | C/T | 03q | C | 0.183035714 | 0.148648649 | 0.350279 |
| rs3760849  | ZNF667        | A/G | 19q | A | 0.459821429 | 0.418918919 | 0.350285 |
| rs1453241  |               | C/T | 03q | T | 0.232142857 | 0.267857143 | 0.35054  |
| rs1053966  | TTC3          | C/G | 21q | G | 0.477272727 | 0.477477478 | 0.350871 |
| rs2292324  | EFCBP2        | C/G | 16q | G | 0.089285714 | 0.116071429 | 0.350909 |
| rs2253869  | DKFZp434J1015 | A/G | 07p | A | 0.446428571 | 0.486607143 | 0.351045 |
| rs118774   |               | A/G | 17q | A | 0.227272727 | 0.265765766 | 0.351241 |
| rs7278737  | LIPI          | G/T | 21q | G | 0.5         | 0.454954955 | 0.351254 |
| rs2239734  | ZNF214        | G/T | 11p | G | 0.076576577 | 0.102678571 | 0.351313 |
| rs10755    | LGALS14       | C/G | 19q | C | 0.35        | 0.308035714 | 0.351435 |
| rs1422698  | ANKRD31       | A/G | 05q | A | 0.345360825 | 0.388888889 | 0.351444 |
| rs12366    | POLE4         | G/T | 02p | T | 0.45        | 0.406542056 | 0.35163  |
| rs2277598  | BBS4          | A/G | 15q | A | 0.360576923 | 0.400990099 | 0.351652 |

|            |                   |     |     |   |             |             |          |
|------------|-------------------|-----|-----|---|-------------|-------------|----------|
| rs11881633 | ECAT8             | A/G | 19q | A | 0.45045045  | 0.49537037  | 0.351719 |
| rs2076015  | TXNDC13           | A/G | 20p | A | 0.142857143 | 0.114678899 | 0.351901 |
| rs11009708 | C10orf112         | A/G | 10p | G | 0.133928571 | 0.162162162 | 0.352446 |
| rs11238247 | DKFZp564N2472     | C/G | 07p | C | 0.463963964 | 0.491071429 | 0.352509 |
| rs1051488  |                   | A/G | 06p | A | 0.379464286 | 0.418918919 | 0.352626 |
| rs2295772  | SEC31B            | A/G | 10q | A | 0.200892857 | 0.236607143 | 0.352876 |
| rs3793706  | SEC31B            | A/C | 10q | A | 0.200892857 | 0.236607143 | 0.352876 |
| rs732774   | ATP7B             | A/G | 13q | G | 0.424107143 | 0.382882883 | 0.352934 |
| rs6665115  |                   | C/T | 01q | T | 0.410714286 | 0.366071429 | 0.352948 |
| rs4340795  | NPNT              | A/G | 04q | A | 0.107142857 | 0.081081081 | 0.353369 |
| rs2067011  | GRM6              | C/T | 05q | T | 0.471428571 | 0.481132076 | 0.353376 |
| rs11640911 |                   | A/G | 16q | G | 0.477678571 | 0.477477478 | 0.353549 |
| rs2228638  | NRP1              | A/G | 10p | A | 0.099099099 | 0.077272727 | 0.353764 |
| rs1433111  |                   | A/T | 19p | T | 0.160714286 | 0.129464286 | 0.353857 |
| rs6968293  | CDC14C            | A/C | 07p | C | 0.482142857 | 0.472727273 | 0.353917 |
| rs491973   | SART1, TSGA10IP   | C/T | 11q | C | 0.495535714 | 0.464285714 | 0.354042 |
| rs3107764  | MUC4              | C/G | 03q | G | 0.346846847 | 0.303571429 | 0.354309 |
| rs657723   |                   | C/T | 17q | C | 0.228971963 | 0.191588785 | 0.354322 |
| rs7642480  |                   | G/T | 03q | G | 0.183035714 | 0.151785714 | 0.354373 |
| rs3817190  | CAMKK2            | A/T | 12q | A | 0.411214953 | 0.462616822 | 0.354484 |
| rs6980476  | FAM82B, LOC642197 | G/T | 08q | G | 0.254464286 | 0.21875     | 0.354585 |
| rs6077510  | PLCB4             | A/G | 20p | G | 0.325892857 | 0.285714286 | 0.35472  |
| rs1339847  | TRIM58            | A/G | 01q | A | 0.112612613 | 0.085585586 | 0.354855 |
| rs6998917  |                   | A/G | 08q | G | 0.339285714 | 0.379464286 | 0.355126 |
| rs231622   | CCNO              | A/G | 05q | A | 0.267857143 | 0.232142857 | 0.355188 |
| rs6478331  |                   | G/T | 09q | T | 0.106481482 | 0.081730769 | 0.355459 |
| rs2347     | POLR3E            | A/C | 16p | C | 0.066964286 | 0.045045045 | 0.355556 |
| rs2269996  | PARP12            | C/T | 07q | T | 0.236607143 | 0.198198198 | 0.35566  |
| rs2075221  | CLEC4F            | C/T | 02p | T | 0.366071429 | 0.325892857 | 0.356146 |
| rs3740217  | ITIH2             | C/G | 10p | C | 0.059090909 | 0.038834951 | 0.356195 |
| rs2304024  | FAT2              | C/T | 05q | T | 0.247747748 | 0.207207207 | 0.356462 |
| rs2305089  | T                 | C/T | 06q | T | 0.473214286 | 0.486486487 | 0.35672  |
| rs4740144  |                   | C/T | 08q | T | 0.279279279 | 0.241071429 | 0.356798 |
| rs10901333 | LAMC3             | A/G | 09q | G | 0.477678571 | 0.432432432 | 0.356865 |
| rs3750041  | MGC12966          | C/T | 07p | T | 0.135135135 | 0.107142857 | 0.356873 |
| rs2271933  | HCRTR1            | C/T | 01p | T | 0.397321429 | 0.357142857 | 0.356873 |
| rs4930979  | MGC24039          | C/T | 12p | T | 0.427927928 | 0.388392857 | 0.357024 |

|            |           |     |     |   |             |             |          |
|------------|-----------|-----|-----|---|-------------|-------------|----------|
| rs2598544  | PTPRQ     | A/G | 12q | G | 0.193693694 | 0.155963303 | 0.35711  |
| rs9604126  | LOC649907 | C/T | 13q | T | 0.345794393 | 0.303738318 | 0.357198 |
| rs2943512  | MUC5B     | G/T | 11p | T | 0.441964286 | 0.486486487 | 0.357459 |
| rs4237768  | OR52L1    | A/G | 11p | A | 0.183035714 | 0.21875     | 0.357586 |
| rs11062385 | JARID1A   | C/T | 12p | C | 0.21875     | 0.254464286 | 0.357703 |
| rs1804211  | MEP1A     | C/T | 06p | T | 0.325688073 | 0.368181818 | 0.357837 |
| rs2075639  | PPL       | C/T | 16p | T | 0.053571429 | 0.036036036 | 0.357947 |
| rs231775   | CTLA4     | A/G | 02q | G | 0.348214286 | 0.389908257 | 0.358131 |
| rs2137722  | NLRP1     | C/T | 17p | T | 0.053571429 | 0.075892857 | 0.358211 |
| rs6862     | LOC389458 | A/C | 07p | A | 0.324324324 | 0.368181818 | 0.35828  |
| rs2278792  | DSG2      | A/G | 18q | A | 0.236607143 | 0.276785714 | 0.358699 |
| rs10746163 | PTPRQ     | G/T | 12q | G | 0.196428571 | 0.160714286 | 0.358717 |
| rs641393   | SYTL2     | A/G | 11q | G | 0.392857143 | 0.352678571 | 0.358852 |
| rs1983609  | PARVB     | C/T | 22q | T | 0.258928571 | 0.223214286 | 0.35896  |
| rs3773309  | IQSEC1    | C/T | 03p | C | 0.125       | 0.099099099 | 0.358965 |
| rs9318554  | PARP4     | A/G | 13q | G | 0.059090909 | 0.081081081 | 0.359028 |
| rs1566275  | OR52H1    | A/G | 11p | A | 0.18018018  | 0.214285714 | 0.359037 |
| rs2370134  | ZIM3      | A/G | 19q | A | 0.154205607 | 0.189320388 | 0.359256 |
| rs7952293  | OR51B2    | A/G | 11p | A | 0.081081081 | 0.108108108 | 0.360033 |
| rs1574030  | LOC150935 | C/T | 02q | T | 0.223214286 | 0.258928571 | 0.360177 |
| rs1040285  | FLJ37396  | A/G | 06q | A | 0.183035714 | 0.21875     | 0.360248 |
| rs2931327  |           | C/G | 08q | C | 0.209821429 | 0.241071429 | 0.360403 |
| rs7106047  | ODZ4      | A/C | 11q | A | 0.259090909 | 0.3         | 0.360443 |
| rs2509350  |           | C/G | 11q | C | 0.18018018  | 0.151376147 | 0.360475 |
| rs273259   | IFI44L    | C/T | 01p | C | 0.334821429 | 0.294642857 | 0.360574 |
| rs4981822  | OR11G2    | A/T | 14q | T | 0.468468468 | 0.491071429 | 0.360767 |
| rs37458    | ST3GAL3   | C/T | 01p | C | 0.379464286 | 0.419642857 | 0.361101 |
| rs9905684  | OR3A4     | A/G | 17p | G | 0.120535714 | 0.09375     | 0.361467 |
| rs925878   | LOC284297 | A/G | 19q | A | 0.205357143 | 0.171171171 | 0.361653 |
| rs3747203  | EFCAB6    | C/T | 22q | C | 0.054054054 | 0.035714286 | 0.36166  |
| rs4706980  | DOPEY1    | A/G | 06q | A | 0.121621622 | 0.094594595 | 0.361738 |
| rs10838881 |           | C/T | 11p | C | 0.133663366 | 0.168539326 | 0.362398 |
| rs946837   | TMTC4     | C/T | 13q | T | 0.276785714 | 0.316964286 | 0.362472 |
| rs3808795  | C9orf39   | C/T | 09p | C | 0.258928571 | 0.297297297 | 0.362595 |
| rs11241095 | WDR36     | A/G | 05q | G | 0.354545455 | 0.315315315 | 0.36279  |
| rs2230240  | MCM3      | A/G | 06p | A | 0.263392857 | 0.22972973  | 0.362825 |
| rs2302465  | BST1      | C/T | 04p | T | 0.125       | 0.098214286 | 0.3629   |

|            |                  |     |     |   |             |             |          |
|------------|------------------|-----|-----|---|-------------|-------------|----------|
| rs1995641  | TGM4             | A/G | 03p | A | 0.375       | 0.419811321 | 0.363088 |
| rs863931   | SPTA1            | A/G | 01q | A | 0.4375      | 0.395454545 | 0.363286 |
| rs254855   |                  | C/T | 03p | T | 0.325892857 | 0.370535714 | 0.363487 |
| rs7332388  | DIS3             | C/G | 13q | C | 0.455357143 | 0.410714286 | 0.363553 |
| rs2034310  | CD300LF, RAB37   | C/T | 17q | T | 0.142857143 | 0.174107143 | 0.363813 |
| rs2271791  | ATP13A5          | C/T | 03q | T | 0.455357143 | 0.5         | 0.363826 |
| rs3733228  | SCD5             | A/C | 04q | A | 0.375       | 0.333333333 | 0.363861 |
| rs11600    | LOC387647        | C/T | 10p | T | 0.102678571 | 0.129464286 | 0.364176 |
| rs1464890  | ZC3HC1           | C/T | 07q | T | 0.4375      | 0.391891892 | 0.364197 |
| rs438999   | SKIV2L           | C/T | 06p | C | 0.095454545 | 0.072072072 | 0.364272 |
| rs10985704 | OR1L8            | G/T | 09q | T | 0.427884615 | 0.468421053 | 0.364521 |
| rs5998405  |                  | A/G | 22q | A | 0.076923077 | 0.055555556 | 0.364619 |
| rs1513629  |                  | A/C | 02q | C | 0.175675676 | 0.211711712 | 0.364839 |
| rs11868599 |                  | A/G | 17q | A | 0.330357143 | 0.290909091 | 0.36579  |
| rs7181742  | CAPN3, GANC      | C/T | 15q | C | 0.111607143 | 0.142857143 | 0.365825 |
| rs2240697  |                  | C/G | 05q | G | 0.392857143 | 0.4375      | 0.366301 |
| rs2308655  | HLA-B, LOC730410 | C/G | 06p | G | 0.313636364 | 0.276785714 | 0.36682  |
| rs1339     | RNF175           | A/G | 04q | G | 0.214285714 | 0.25        | 0.366893 |
| rs10768156 |                  | A/G | 11p | G | 0.357142857 | 0.397321429 | 0.366971 |
| rs2802269  | CDC42BPA         | A/G | 01q | G | 0.084821429 | 0.111607143 | 0.367272 |
| rs3802799  | NAV2             | G/T | 11p | T | 0.188073395 | 0.220183486 | 0.367439 |
| rs10972348 |                  | C/G | 09p | C | 0.436936937 | 0.396396396 | 0.367463 |
| rs3756323  | PCDHB11          | C/T | 05q | C | 0.1875      | 0.15625     | 0.367468 |
| rs7312857  | BIN2             | C/T | 12q | T | 0.084821429 | 0.107142857 | 0.367521 |
| rs2073290  | SEL1L2           | A/C | 20p | C | 0.267857143 | 0.234234234 | 0.367556 |
| rs7653897  | GPRIN3           | A/G | 04q | A | 0.445454545 | 0.486607143 | 0.367606 |
| rs1805327  | RAD1             | A/G | 05p | G | 0.068807339 | 0.049107143 | 0.36781  |
| rs11758339 | DST              | C/T | 06p | T | 0.27027027  | 0.310810811 | 0.367897 |
| rs35684    | GHRL, C3orf42    | A/G | 03p | G | 0.305555556 | 0.339449541 | 0.368411 |
| rs17118    | XYLB             | A/C | 03p | A | 0.388888889 | 0.344660194 | 0.368561 |
| rs12336965 | GLT6D1           | G/T | 09q | T | 0.234234234 | 0.200892857 | 0.368604 |
| rs857725   | SPTA1            | G/T | 01q | G | 0.31981982  | 0.28125     | 0.368807 |
| rs2287926  | VCAN             | A/G | 05q | A | 0.165178571 | 0.133928571 | 0.368974 |
| rs743686   | KRT35            | A/G | 17q | A | 0.495535714 | 0.459821429 | 0.368982 |
| rs10497392 | LOC643997        | A/G | 02q | A | 0.071428571 | 0.09375     | 0.369044 |
| rs870190   |                  | A/G | 04q | A | 0.25        | 0.214285714 | 0.369098 |
| rs10859974 | CCDC38           | C/T | 12q | C | 0.165178571 | 0.135135135 | 0.369188 |

|            |                |     |     |   |             |             |          |
|------------|----------------|-----|-----|---|-------------|-------------|----------|
| rs1052200  | CPVL           | A/G | 07p | A | 0.116071429 | 0.142857143 | 0.369348 |
| rs1229984  | ADH1B          | A/G | 04q | A | 0.058035714 | 0.081081081 | 0.369429 |
| rs256653   |                | C/G | 12p | C | 0.315315315 | 0.355855856 | 0.369602 |
| rs7706028  |                | G/T | 05q | G | 0.313636364 | 0.273584906 | 0.369678 |
| rs103612   | NUP214         | C/T | 09q | C | 0.348214286 | 0.309090909 | 0.369874 |
| rs10916668 | OTUD3          | A/G | 01p | A | 0.072072072 | 0.095454545 | 0.370035 |
| rs1131199  | CD200          | C/G | 03q | C | 0.46875     | 0.427927928 | 0.370062 |
| rs11673029 | ZNF606         | C/T | 19q | C | 0.117924528 | 0.146226415 | 0.370154 |
| rs4665855  | OTOF           | A/G | 02p | A | 0.392857143 | 0.351351351 | 0.37031  |
| rs2230281  | GALNT4, WDR51B | C/T | 12q | T | 0.254464286 | 0.292792793 | 0.370325 |
| rs306481   | NLRP8          | C/T | 19q | T | 0.410714286 | 0.450892857 | 0.370487 |
| rs3008858  | MIER1, WDR78   | C/G | 01p | G | 0.240566038 | 0.278301887 | 0.370579 |
| rs1802073  | SFRP4          | A/C | 07p | A | 0.375       | 0.413636364 | 0.370804 |
| rs10896290 | OR8J1          | A/G | 11q | G | 0.292792793 | 0.334821429 | 0.371113 |
| rs2170363  | GEM            | C/G | 08q | C | 0.098214286 | 0.126126126 | 0.371256 |
| rs2236359  | C1orf142       | C/T | 01q | C | 0.366071429 | 0.40625     | 0.371295 |
| rs12450410 |                | A/G | 17q | A | 0.220720721 | 0.1875      | 0.371316 |
| rs7171194  | LOC390637      | C/T | 15q | T | 0.397321429 | 0.352678571 | 0.371424 |
| rs599176   |                | A/T | 05p | T | 0.071428571 | 0.095454546 | 0.371584 |
| rs2726836  | HSP90AA2       | A/G | 11p | G | 0.120535714 | 0.147321429 | 0.372032 |
| rs7853346  | LOC731292      | C/G | 09p | G | 0.265765766 | 0.301801802 | 0.372103 |
| rs620552   | PRUNE2         | C/T | 09q | T | 0.195454546 | 0.232142857 | 0.37235  |
| rs987495   | IFI44L         | A/G | 01p | G | 0.254464286 | 0.21875     | 0.372383 |
| rs9935059  | EEF2K          | A/G | 16p | G | 0.072727273 | 0.095454546 | 0.372494 |
| rs11207933 | L1TD1          | A/C | 01p | A | 0.09047619  | 0.117647059 | 0.372968 |
| rs3218660  | POLM           | A/C | 07p | A | 0.256756757 | 0.220720721 | 0.373187 |
| rs1709189  | SLC5A8         | C/T | 12q | T | 0.195454546 | 0.227678571 | 0.373401 |
| rs10876327 |                | A/G | 12q | G | 0.186363636 | 0.15625     | 0.373646 |
| rs2709115  |                | C/T | 07p | C | 0.388392857 | 0.428571429 | 0.373726 |
| rs6742154  |                | A/C | 02p | C | 0.419642857 | 0.459821429 | 0.374051 |
| rs1053783  | DEFB129        | C/G | 20p | G | 0.107142857 | 0.081081081 | 0.374099 |
| rs2249542  | GLOD4, RNMTL1  | A/G | 17p | A | 0.247747748 | 0.285714286 | 0.374139 |
| rs3213690  | AMZ2           | C/T | 17q | T | 0.27027027  | 0.30952381  | 0.374744 |
| rs4797265  | FLJ38028       | G/T | 18p | G | 0.495327103 | 0.450980392 | 0.374756 |
| rs2001080  |                | A/G | 22q | A | 0.301801802 | 0.263636364 | 0.374859 |
| rs10771427 | CCDC91         | A/G | 12p | G | 0.20754717  | 0.240740741 | 0.375058 |
| rs2304802  | FLJ11184       | G/T | 04q | G | 0.482142857 | 0.441964286 | 0.375316 |

|            |               |     |     |   |             |             |          |
|------------|---------------|-----|-----|---|-------------|-------------|----------|
| rs10501429 | NARS2         | G/T | 11q | T | 0.200892857 | 0.236607143 | 0.375462 |
| rs807459   | CLTCL1        | C/T | 22q | C | 0.0625      | 0.084821429 | 0.375569 |
| rs9893920  |               | C/T | 17q | T | 0.193693694 | 0.222727273 | 0.375631 |
| rs11742570 |               | C/T | 05p | T | 0.357142857 | 0.397321429 | 0.375632 |
| rs1363061  |               | C/T | 02p | T | 0.133928571 | 0.107142857 | 0.37567  |
| rs3121478  | NRAP          | C/T | 10q | C | 0.370535714 | 0.410714286 | 0.375941 |
| rs2303982  | SEMA5B        | G/T | 03q | T | 0.183035714 | 0.216216216 | 0.376215 |
| rs1042044  | GLP1R         | A/C | 06p | A | 0.425233645 | 0.465346535 | 0.376493 |
| rs1133657  | KIAA1430      | A/G | 04q | A | 0.463963964 | 0.495535714 | 0.37692  |
| rs4728190  | C7orf45       | C/T | 07q | T | 0.227272727 | 0.263392857 | 0.376976 |
| rs1800067  | ERCC4         | A/G | 16p | A | 0.084821429 | 0.0625      | 0.377184 |
| rs335524   | CENPF         | C/T | 01q | T | 0.424107143 | 0.386363636 | 0.377236 |
| rs10778257 | C12orf42      | G/T | 12q | T | 0.379464286 | 0.339285714 | 0.377393 |
| rs203534   | LOC642636     | G/T | 20p | G | 0.472527473 | 0.477011494 | 0.377629 |
| rs978009   |               | A/G | 06p | A | 0.414414414 | 0.454545454 | 0.377684 |
| rs2983640  | CST9          | A/G | 20p | G | 0.379464286 | 0.339285714 | 0.377717 |
| rs952094   | SPTA1         | A/G | 01q | A | 0.455357143 | 0.414414414 | 0.377809 |
| rs7216284  | GGT6          | A/G | 17p | A | 0.254464286 | 0.21875     | 0.378096 |
| rs680959   |               | C/G | 03p | G | 0.477678571 | 0.436936937 | 0.378315 |
| rs1057746  | SSX2IP        | C/T | 01p | T | 0.419642857 | 0.379464286 | 0.378403 |
| rs1138357  | BCL2A1        | A/G | 15q | A | 0.276785714 | 0.241071429 | 0.378453 |
| rs2342767  | RAET1E        | C/G | 06q | G | 0.425925926 | 0.467889908 | 0.378489 |
| rs9659529  | PRAMEF2       | C/G | 01p | G | 0.102803738 | 0.12962963  | 0.3785   |
| rs1905055  | OR8K1         | A/G | 11q | A | 0.292792793 | 0.334862385 | 0.378669 |
| rs7617376  |               | A/C | 03q | C | 0.379464286 | 0.339285714 | 0.379163 |
| rs7243248  | DKFZp779B1634 | A/G | 18p | G | 0.378378378 | 0.337837838 | 0.379456 |
| rs4861358  | APBB2         | C/T | 04p | C | 0.28125     | 0.245535714 | 0.379539 |
| rs162036   | MTRR          | A/G | 05p | G | 0.119266055 | 0.147321429 | 0.379573 |
| rs2274658  | MEP1A         | G/T | 06p | T | 0.377358491 | 0.417475728 | 0.379854 |
| rs4013819  |               | C/G | 09p | G | 0.352678571 | 0.392857143 | 0.379897 |
| rs3776070  | SLC26A2       | A/T | 05q | T | 0.183035714 | 0.151785714 | 0.380094 |
| rs396520   |               | C/T | 18p | T | 0.174107143 | 0.205357143 | 0.380251 |
| rs4747723  |               | A/G | 10p | G | 0.3         | 0.259090909 | 0.380342 |
| rs1965209  | OR2D2         | A/G | 11p | G | 0.223214286 | 0.258928571 | 0.380351 |
| rs2783786  |               | A/G | 14q | A | 0.384259259 | 0.342342342 | 0.380611 |
| rs826327   |               | A/G | 19q | G | 0.486486486 | 0.46875     | 0.380737 |
| rs2193587  | DGKG          | A/G | 03q | G | 0.245454546 | 0.209821429 | 0.380808 |

|            |                        |     |     |   |             |             |          |
|------------|------------------------|-----|-----|---|-------------|-------------|----------|
| rs7926933  | DTX4, MPEG1, LOC730916 | A/G | 11q | A | 0.126126126 | 0.1         | 0.380824 |
| rs2773347  | C9orf97                | C/T | 09q | C | 0.334821429 | 0.297297297 | 0.380924 |
| rs4557093  |                        | A/G | 03p | A | 0.290178571 | 0.325892857 | 0.380946 |
| rs10928050 |                        | A/G | 01p | G | 0.189189189 | 0.160714286 | 0.381265 |
| rs3747129  | HPS4                   | A/G | 22q | A | 0.174107143 | 0.142857143 | 0.381405 |
| rs9332464  | LOC728780              | A/G | 05q | A | 0.227678571 | 0.261261261 | 0.381577 |
| rs6438191  | ZNF80                  | C/T | 03q | C | 0.345454545 | 0.384259259 | 0.381673 |
| rs2274702  | LEMD1                  | G/T | 01q | G | 0.075892857 | 0.099099099 | 0.381677 |
| rs2366926  | GPR98                  | A/G | 05q | G | 0.3125      | 0.352678571 | 0.381713 |
| rs2075033  | B4GALNT3               | A/G | 12p | A | 0.058035714 | 0.080357143 | 0.382004 |
| rs11689281 | ACCN4, CHPF            | G/T | 02q | G | 0.454954955 | 0.495535714 | 0.382145 |
| rs3108171  | ZNF382                 | C/T | 19q | T | 0.334821429 | 0.375       | 0.382359 |
| rs8305     | POLI                   | A/G | 18q | G | 0.310810811 | 0.348214286 | 0.382387 |
| rs10266424 | MTERF                  | C/T | 07q | C | 0.491071429 | 0.464285714 | 0.382739 |
| rs763471   |                        | G/T | 11p | G | 0.454954955 | 0.495535714 | 0.382888 |
| rs2290305  | TTLL3                  | G/T | 03p | T | 0.303571429 | 0.339285714 | 0.383307 |
| rs3803036  | PTPRR                  | A/G | 12q | A | 0.200892857 | 0.236363636 | 0.383373 |
| rs2290532  | OSBPL10                | C/T | 03p | T | 0.490476191 | 0.450450451 | 0.383886 |
| rs9614382  | EFCAB6                 | A/G | 22q | G | 0.276785714 | 0.243243243 | 0.38401  |
| rs921963   |                        | G/T | 02p | G | 0.313636364 | 0.352678571 | 0.384084 |
| rs9547952  | POSTN                  | C/T | 13q | T | 0.053921569 | 0.075       | 0.384762 |
| rs10864004 | LOC149643              | A/G | 01q | A | 0.295454545 | 0.254464286 | 0.384852 |
| rs12090888 | C1orf201               | A/G | 01p | G | 0.108108108 | 0.136363636 | 0.384879 |
| rs10791893 | OR5T2                  | C/G | 11q | C | 0.107142857 | 0.133928571 | 0.385056 |
| rs7212506  | ABCA6                  | C/T | 17q | C | 0.077272727 | 0.058035714 | 0.385168 |
| rs11883054 | LOC388503              | G/T | 19p | T | 0.34375     | 0.306306306 | 0.385216 |
| rs2232041  | C1orf103               | A/G | 01p | A | 0.236607143 | 0.205357143 | 0.385485 |
| rs11007612 | SVIL                   | A/G | 10p | G | 0.103603604 | 0.129464286 | 0.386097 |
| rs714368   | SLC22A16               | A/G | 06q | G | 0.218181818 | 0.254464286 | 0.386161 |
| rs4986790  | TLR4                   | A/G | 09q | G | 0.053571429 | 0.071428571 | 0.38623  |
| rs3125630  | STIL                   | A/G | 01p | G | 0.459821429 | 0.5         | 0.386502 |
| rs7410919  |                        | C/T | 01q | T | 0.450892857 | 0.410714286 | 0.386669 |
| rs1799814  | CYP1A1                 | A/C | 15q | A | 0.071428571 | 0.049549549 | 0.386731 |
| rs8069315  | DHX33                  | A/G | 17p | A | 0.103603604 | 0.129464286 | 0.38697  |
| rs11750538 | MYO10                  | A/G | 05p | G | 0.405405405 | 0.450892857 | 0.387024 |
| rs1563632  | SMCR8                  | C/T | 17p | C | 0.330357143 | 0.366071429 | 0.38704  |



|            |                     |     |     |   |             |             |          |
|------------|---------------------|-----|-----|---|-------------|-------------|----------|
| rs6746030  | SCN9A               | A/G | 02q | A | 0.162162162 | 0.135135135 | 0.387129 |
| rs6018     | F5                  | G/T | 01q | G | 0.09009009  | 0.068181818 | 0.387193 |
| rs292538   |                     | A/G | 07q | A | 0.272321429 | 0.234234234 | 0.387259 |
| rs6574     | MPHOSPH10           | C/T | 02p | T | 0.290178571 | 0.330357143 | 0.387502 |
| rs1045546  | TAPBPL              | A/G | 12p | A | 0.130630631 | 0.160714286 | 0.387917 |
| rs10826848 |                     | A/G | 10p | G | 0.075892857 | 0.099099099 | 0.38793  |
| rs1881420  | ALK                 | A/G | 02p | G | 0.256756757 | 0.223214286 | 0.387974 |
| rs6484341  | HSP90AA2            | A/T | 11p | T | 0.121621622 | 0.147321429 | 0.38814  |
| rs5368     | SELE                | C/T | 01q | T | 0.116071429 | 0.09375     | 0.388254 |
| rs916957   |                     | A/G | 19p | A | 0.348214286 | 0.3125      | 0.388265 |
| rs2708912  | LOC136288           | A/G | 07p | G | 0.053571429 | 0.076576577 | 0.388293 |
| rs1761608  |                     | A/G | 06q | A | 0.431818182 | 0.473214286 | 0.388627 |
| rs2279054  | QRICH2              | A/G | 17q | A | 0.258928571 | 0.294642857 | 0.388831 |
| rs625223   | NEBL, C10orf113     | C/G | 10p | G | 0.310810811 | 0.351351351 | 0.388863 |
| rs10839708 | NLRP14              | A/G | 11p | G | 0.392857143 | 0.433035714 | 0.388987 |
| rs330150   | DNAH3               | C/G | 16p | C | 0.135135135 | 0.109090909 | 0.389077 |
| rs2014055  | MRC2                | C/T | 17q | T | 0.174107143 | 0.142857143 | 0.389099 |
| rs2279052  | QRICH2              | C/G | 17q | G | 0.267857143 | 0.303571429 | 0.389262 |
| rs2279053  | QRICH2              | C/T | 17q | C | 0.267857143 | 0.303571429 | 0.389262 |
| rs4882756  | TMEM132C            | C/G | 12q | C | 0.297297297 | 0.334821429 | 0.38939  |
| rs3138038  |                     | A/C | 17q | C | 0.116071429 | 0.142857143 | 0.389752 |
| rs10419393 |                     | A/G | 19q | G | 0.486607143 | 0.450892857 | 0.389895 |
| rs3173615  | TMEM106B            | C/G | 07p | G | 0.414414414 | 0.372727273 | 0.390153 |
| rs7865433  |                     | A/C | 09q | C | 0.1875      | 0.21875     | 0.390275 |
| rs2250889  | MMP9                | C/G | 20q | G | 0.066964286 | 0.049107143 | 0.390304 |
| rs1043831  | KIAA0323, C14orf124 | A/G | 14q | A | 0.084821429 | 0.107142857 | 0.390306 |
| rs6471514  |                     | C/T | 08q | C | 0.445454545 | 0.405405405 | 0.390335 |
| rs10983304 | TRIM32, ASTN2       | C/T | 09q | T | 0.063636364 | 0.044642857 | 0.390371 |
| rs1570581  | GPR144              | A/G | 09q | G | 0.495535714 | 0.455357143 | 0.3904   |
| rs9373475  | FBXO30              | C/T | 06q | T | 0.382882883 | 0.419642857 | 0.390462 |
| rs938886   | TEP1                | C/G | 14q | C | 0.238738739 | 0.204545454 | 0.390529 |
| rs7950873  | RSF1                | A/G | 11q | G | 0.220720721 | 0.254464286 | 0.390661 |
| rs7565062  | SCN7A               | G/T | 02q | G | 0.230769231 | 0.266990291 | 0.390725 |
| rs2002395  |                     | C/T | 12q | T | 0.397321429 | 0.4375      | 0.390831 |
| rs10736655 |                     | C/T | 11q | C | 0.294642857 | 0.334821429 | 0.390876 |
| rs3213430  |                     | C/T | 12p | C | 0.321428571 | 0.361607143 | 0.391003 |
| rs2295852  | SLC26A8             | C/T | 06p | C | 0.373873874 | 0.333333333 | 0.391015 |

|            |                      |     |     |   |             |             |          |
|------------|----------------------|-----|-----|---|-------------|-------------|----------|
| rs2903250  | IGSF11               | G/T | 03q | G | 0.195454545 | 0.224770642 | 0.391067 |
| rs2293583  | MGC26647, ZNF804B    | C/T | 07q | C | 0.104545454 | 0.080357143 | 0.391168 |
| rs451195   | PPIC                 | C/T | 05q | C | 0.373873874 | 0.413636364 | 0.391294 |
| rs2830585  | ADAMTS5              | C/T | 21q | T | 0.15625     | 0.1875      | 0.391414 |
| rs10193972 | ALMS1                | A/G | 02p | G | 0.274774775 | 0.241071429 | 0.391651 |
| rs2056486  | ALMS1                | A/C | 02p | A | 0.272321429 | 0.238738739 | 0.391737 |
| rs2248470  |                      | C/T | 21q | T | 0.084821429 | 0.0625      | 0.391826 |
| rs12157    | LINS1                | C/G | 15q | C | 0.495535714 | 0.454954955 | 0.391937 |
| rs11177    | GNL3                 | C/T | 03p | T | 0.433035714 | 0.391891892 | 0.391985 |
| rs3755073  | SRBD1                | A/C | 02p | A | 0.102678571 | 0.081081081 | 0.392363 |
| rs11219413 | OR10G9               | A/G | 11q | G | 0.294642857 | 0.330357143 | 0.392585 |
| rs11222085 | ADAMTS8              | C/T | 11q | C | 0.174107143 | 0.142857143 | 0.392665 |
| rs2219078  | SULT1C3              | A/G | 02q | A | 0.174311927 | 0.205357143 | 0.392957 |
| rs1545     | MKKS                 | A/C | 20p | A | 0.117924528 | 0.09223301  | 0.392985 |
| rs562993   |                      | A/T | 11q | A | 0.327272727 | 0.290178571 | 0.393106 |
| rs10515294 |                      | A/G | 05q | G | 0.283783784 | 0.247706422 | 0.393387 |
| rs4800091  | LOC388474, LOC647946 | C/T | 18q | T | 0.09009009  | 0.116071429 | 0.393476 |
| rs3826616  | SERPIN8              | A/G | 18q | A | 0.419642857 | 0.459459459 | 0.393601 |
| rs11640138 | TNP2                 | A/G | 16p | A | 0.481981982 | 0.473214286 | 0.394401 |
| rs915843   | ABCG1                | C/T | 21q | T | 0.118181818 | 0.09375     | 0.39482  |
| rs1429077  | ZC3H7A               | A/G | 16p | G | 0.063636364 | 0.084821429 | 0.39493  |
| rs2234233  | TAS2R1               | C/T | 05p | T | 0.142857143 | 0.174107143 | 0.395051 |
| rs11738780 |                      | C/T | 05q | C | 0.166666667 | 0.198198198 | 0.395062 |
| rs26653    | ARTS-1               | C/G | 05q | C | 0.263392857 | 0.299107143 | 0.395122 |
| rs12327617 | ZNF700               | A/G | 19p | G | 0.075892857 | 0.098214286 | 0.395149 |
| rs4795847  |                      | C/G | 17q | G | 0.383928571 | 0.424107143 | 0.3953   |
| rs4900268  | C14orf49             | A/G | 14q | G | 0.392857143 | 0.354545455 | 0.395422 |
| rs4830     | LGALS14              | A/G | 19q | A | 0.351351351 | 0.3125      | 0.395466 |
| rs732609   | TPO                  | A/C | 02p | C | 0.410714286 | 0.370535714 | 0.39551  |
| rs10239197 | ZNF92                | A/G | 07q | A | 0.21559633  | 0.181818182 | 0.395731 |
| rs1785934  | ELP2                 | G/T | 18q | G | 0.415178571 | 0.375       | 0.39588  |
| rs3127106  | NRAP                 | C/T | 10q | T | 0.366071429 | 0.404545455 | 0.396031 |
| rs1056464  | KCNA5                | C/T | 12p | T | 0.063106796 | 0.04587156  | 0.396195 |
| rs1451661  |                      | A/G | 11p | G | 0.330357143 | 0.294642857 | 0.396442 |
| rs2172257  | MINA                 | C/T | 03q | T | 0.486607143 | 0.473214286 | 0.396808 |
| rs6841334  | KIAA0232             | C/G | 04p | G | 0.391891892 | 0.354545455 | 0.397022 |
| rs6511763  |                      | C/G | 19p | C | 0.144144144 | 0.115740741 | 0.39725  |

|            |                 |     |     |   |             |             |          |
|------------|-----------------|-----|-----|---|-------------|-------------|----------|
| rs6533616  | ALPK1           | A/G | 04q | G | 0.098214286 | 0.120535714 | 0.397276 |
| rs3742000  |                 | A/G | 12q | G | 0.172222222 | 0.207865169 | 0.397382 |
| rs8142477  | CPT1B           | C/G | 22q | C | 0.138392857 | 0.112612613 | 0.397411 |
| rs1347570  | OVCH1           | C/G | 12p | G | 0.418918919 | 0.459090909 | 0.397568 |
| rs3761013  |                 | A/G | 19p | G | 0.355855856 | 0.31981982  | 0.397642 |
| rs585627   | C1orf107        | C/G | 01q | G | 0.231818182 | 0.269230769 | 0.397894 |
| rs11710965 | ZNF445          | C/T | 03p | C | 0.151785714 | 0.126126126 | 0.397896 |
| rs1047626  | SLC30A9         | A/G | 04p | A | 0.28125     | 0.245535714 | 0.397985 |
| rs3010877  | AADACL3         | C/T | 01p | T | 0.222727273 | 0.188679245 | 0.398147 |
| rs2305030  | LTK             | C/T | 15q | T | 0.103603604 | 0.081081081 | 0.398282 |
| rs1057091  | MCPH1           | C/T | 08p | T | 0.3125      | 0.276785714 | 0.398355 |
| rs4801177  | ZNF470          | C/T | 19q | C | 0.3         | 0.263392857 | 0.398451 |
| rs675531   | C6orf190        | C/T | 06q | T | 0.351351351 | 0.311926606 | 0.398461 |
| rs1801243  | ATP7B           | G/T | 13q | T | 0.486363636 | 0.47706422  | 0.398466 |
| rs25882    | CSF2            | C/T | 05q | C | 0.209821429 | 0.175675676 | 0.398511 |
| rs4661330  | FHAD1           | A/G | 01p | G | 0.290909091 | 0.254545455 | 0.398705 |
| rs154001   | FBN2            | C/T | 05q | C | 0.290178571 | 0.325892857 | 0.398774 |
| rs2278107  | EPHA7           | C/T | 06q | C | 0.067567568 | 0.049107143 | 0.398836 |
| rs10828663 | KIAA1217        | A/G | 10p | A | 0.252293578 | 0.286363636 | 0.398912 |
| rs3750208  | ZC3H3           | C/T | 08q | T | 0.151785714 | 0.125       | 0.399057 |
| rs2285421  | UPK1A           | C/T | 19q | C | 0.495535714 | 0.464285714 | 0.399144 |
| rs9127     |                 | A/G | 05q | A | 0.468468469 | 0.491071429 | 0.399157 |
| rs10233232 | LOC136288       | C/T | 07p | T | 0.053571429 | 0.075892857 | 0.399329 |
| rs10764176 | SLC39A12        | A/G | 10p | G | 0.271428571 | 0.306603774 | 0.399424 |
| rs2302610  |                 | C/G | 02q | C | 0.120535714 | 0.147321429 | 0.399519 |
| rs25695    | TMEM2           | A/T | 09q | A | 0.077272727 | 0.058035714 | 0.399578 |
| rs3807068  | ZNF117          | G/T | 07q | G | 0.348214286 | 0.387387387 | 0.399629 |
| rs12269028 | ZNF22, C10orf25 | A/T | 10q | A | 0.297297297 | 0.334821429 | 0.399711 |
| rs6875544  |                 | A/G | 05p | A | 0.068181818 | 0.049107143 | 0.399773 |
| rs7925620  |                 | C/G | 11p | C | 0.381818182 | 0.345454545 | 0.400156 |
| rs2240539  | MTERFD2         | C/G | 02q | C | 0.050458716 | 0.070754717 | 0.400189 |
| rs1551569  |                 | C/T | 19p | T | 0.330357143 | 0.294642857 | 0.400661 |
| rs2976708  |                 | C/T | 03q | C | 0.087155963 | 0.111650485 | 0.400675 |
| rs4982419  | OR5AU1          | A/G | 14q | G | 0.231818182 | 0.200892857 | 0.400687 |
| rs5750728  | APOBEC3F        | C/T | 22q | C | 0.446428571 | 0.490909091 | 0.401168 |
| rs11707648 |                 | C/T | 03p | C | 0.160714286 | 0.191964286 | 0.401311 |
| rs527221   | DMPK            | C/G | 19q | C | 0.098214286 | 0.125       | 0.401361 |

|            |                    |     |     |   |             |             |          |
|------------|--------------------|-----|-----|---|-------------|-------------|----------|
| rs9880989  | IQCG               | G/T | 03q | T | 0.166666667 | 0.138392857 | 0.401457 |
| rs7929412  |                    | A/G | 11p | G | 0.181818182 | 0.153153153 | 0.401508 |
| rs2708890  | LOC136288          | A/C | 07p | C | 0.053571429 | 0.075892857 | 0.401616 |
| rs10484549 | C6orf12            | C/T | 06p | C | 0.075892857 | 0.058035714 | 0.401783 |
| rs8098788  |                    | C/T | 18q | C | 0.084821429 | 0.107142857 | 0.401834 |
| rs614486   | LOC374973          | A/C | 01p | C | 0.306306306 | 0.272321429 | 0.401838 |
| rs4679394  | MUC13              | A/G | 03q | A | 0.131818182 | 0.160714286 | 0.401944 |
| rs10157977 | C1orf99            | C/G | 01q | C | 0.272727273 | 0.233333333 | 0.402069 |
| rs394558   | TATDN2             | A/G | 03p | A | 0.415178571 | 0.450892857 | 0.40249  |
| rs10807862 |                    | A/T | 07p | A | 0.133928571 | 0.160714286 | 0.402767 |
| rs9843784  | COMMD2             | G/T | 03q | G | 0.423423423 | 0.463963964 | 0.402895 |
| rs2239808  | KCTD20             | C/G | 06p | G | 0.220720721 | 0.1875      | 0.402948 |
| rs1810247  | LOC650137          | C/T | 15q | T | 0.252252252 | 0.28125     | 0.403236 |
| rs11668767 | LTBP4              | C/T | 19q | T | 0.373873874 | 0.334821429 | 0.403364 |
| rs10778752 | PTPRQ              | A/T | 12q | T | 0.058035714 | 0.075892857 | 0.403412 |
| rs1076669  | ECE1               | C/T | 01p | T | 0.09375     | 0.072072072 | 0.403471 |
| rs713598   | TAS2R38            | C/G | 07q | C | 0.463963964 | 0.423423423 | 0.403734 |
| rs3765124  | ADAMDEC1           | A/G | 08p | G | 0.382882883 | 0.418918919 | 0.403873 |
| rs11089254 |                    | A/G | 22q | A | 0.058035714 | 0.040178571 | 0.40396  |
| rs4963245  | MGC34821           | C/G | 11q | C | 0.308035714 | 0.272321429 | 0.404269 |
| rs868302   | SRL                | A/G | 16p | G | 0.252252252 | 0.222222222 | 0.404291 |
| rs11076256 | GOT2               | A/G | 16q | A | 0.160714286 | 0.189189189 | 0.404424 |
| rs6082456  |                    | A/G | 20p | G | 0.40625     | 0.441964286 | 0.404495 |
| rs2873479  | TRDN               | A/C | 06q | A | 0.080357143 | 0.102678571 | 0.404499 |
| rs1053401  |                    | A/C | 04p | A | 0.072072072 | 0.09375     | 0.404534 |
| rs1558526  | A2ML1              | A/G | 12p | A | 0.227678571 | 0.263392857 | 0.404599 |
| rs2070150  | ATF6               | C/G | 01q | C | 0.09375     | 0.071428571 | 0.404925 |
| rs1867780  | SGK269             | C/G | 15q | C | 0.299107143 | 0.263392857 | 0.404949 |
| rs6027     | F5                 | A/G | 01q | G | 0.086363636 | 0.064814815 | 0.404959 |
| rs1801255  | GPR56              | A/C | 16q | C | 0.263392857 | 0.232142857 | 0.405075 |
| rs2305777  | CC2D1A             | C/T | 19p | T | 0.234234234 | 0.267857143 | 0.405265 |
| rs744224   | IQGAP3             | A/G | 01q | A | 0.258928571 | 0.225225225 | 0.40533  |
| rs2886059  | ALDH1L1            | G/T | 03q | T | 0.142857143 | 0.171171171 | 0.405396 |
| rs7222009  | LOC645027          | A/G | 17p | G | 0.410714286 | 0.446428571 | 0.405497 |
| rs4504745  | ZNF79              | A/G | 09q | A | 0.462264151 | 0.419811321 | 0.405642 |
| rs966185   | DDEF1              | A/G | 08q | G | 0.441964286 | 0.482142857 | 0.405802 |
| rs10489177 | C1orf112, C1orf156 | A/C | 01q | C | 0.116071429 | 0.142857143 | 0.405972 |

|            |                                                                                      |     |     |   |             |             |          |
|------------|--------------------------------------------------------------------------------------|-----|-----|---|-------------|-------------|----------|
| rs12408890 | WDR8                                                                                 | C/T | 01p | C | 0.348214286 | 0.383928571 | 0.406002 |
| rs3795375  | KIAA1804                                                                             | C/T | 01q | T | 0.216216216 | 0.183035714 | 0.406042 |
| rs6853742  | SMR3A                                                                                | C/T | 04q | C | 0.333333333 | 0.375       | 0.406059 |
| rs3826096  | CCDC113, Kikbl4                                                                      | C/T | 16q | T | 0.495535714 | 0.455357143 | 0.40607  |
| rs1813160  | MPHOSPH10                                                                            | A/C | 02p | A | 0.303571429 | 0.342342342 | 0.406144 |
| rs11088818 | C21orf99                                                                             | C/T | 21q | T | 0.178571429 | 0.151785714 | 0.406437 |
| rs7639618  | LOC344875, LOC731643                                                                 | C/T | 03p | T | 0.182242991 | 0.152777778 | 0.406444 |
| rs11156431 | LOC729788, LOC729792,<br>LOC730400, LOC730401,<br>LOC730408, LOC730409,<br>LOC732021 | C/T | 06q | T | 0.116071429 | 0.142857143 | 0.40693  |
| rs3094672  | LOC732021                                                                            | A/T | 06p | A | 0.272321429 | 0.238738739 | 0.407021 |
| rs7941404  | AGBL2                                                                                | C/T | 11p | T | 0.138392857 | 0.112612613 | 0.407023 |
| rs3803199  | LOC647166, LOC652259                                                                 | A/G | 13q | A | 0.223214286 | 0.254464286 | 0.40721  |
| rs3803200  | LOC647166, LOC652259                                                                 | A/G | 13q | A | 0.223214286 | 0.254464286 | 0.40721  |
| rs4715631  | DST                                                                                  | C/T | 06p | T | 0.290178571 | 0.325892857 | 0.407285 |
| rs11204774 | MGC29891                                                                             | A/G | 01q | A | 0.086363636 | 0.064220183 | 0.407288 |
| rs4688023  | POPDC2                                                                               | C/T | 03q | T | 0.455357143 | 0.415178571 | 0.407306 |
| rs7926083  | OR10A2                                                                               | A/C | 11p | C | 0.40625     | 0.364864865 | 0.407686 |
| rs3744355  | CCDC16                                                                               | C/G | 17q | C | 0.075892857 | 0.098214286 | 0.408031 |
| rs1885097  | ACIN1                                                                                | A/G | 14q | G | 0.462616822 | 0.422018349 | 0.408037 |
| rs211450   | LYPLA2P1                                                                             | A/G | 06p | A | 0.302752294 | 0.274774775 | 0.40875  |
| rs2241414  | CCDC113, Kikbl4                                                                      | C/T | 16q | C | 0.084821429 | 0.108108108 | 0.408869 |
| rs4951039  | C1orf157                                                                             | A/G | 01q | G | 0.127358491 | 0.159090909 | 0.409067 |
| rs2106673  | MAN2A2                                                                               | C/T | 15q | C | 0.330357143 | 0.294642857 | 0.409087 |
| rs2549782  | LRAP                                                                                 | G/T | 05q | T | 0.5         | 0.45945946  | 0.409125 |
| rs4982766  | ZFHX2                                                                                | A/G | 14q | G | 0.263392857 | 0.22972973  | 0.409133 |
| rs7020782  | PAPPA                                                                                | A/C | 09q | C | 0.267857143 | 0.303571429 | 0.409192 |
| rs2322659  | LCT                                                                                  | C/T | 02q | T | 0.28125     | 0.31981982  | 0.409425 |
| rs1774416  |                                                                                      | C/T | 16q | C | 0.144144144 | 0.169642857 | 0.409434 |
| rs11082414 | SETBP1                                                                               | C/G | 18q | C | 0.1875      | 0.157657658 | 0.409486 |
| rs3796028  | TNS1                                                                                 | A/G | 02q | A | 0.397321429 | 0.357142857 | 0.409687 |
| rs213950   | CFTR                                                                                 | A/G | 07q | A | 0.346846847 | 0.383928571 | 0.409913 |
| rs3742536  | NID2                                                                                 | C/T | 14q | T | 0.289719626 | 0.254716981 | 0.410553 |
| rs444772   | RP1                                                                                  | A/G | 08q | A | 0.261261261 | 0.22972973  | 0.410599 |
| rs1134647  | SMYD2                                                                                | A/G | 01q | G | 0.112612613 | 0.088785047 | 0.4106   |
| rs2777998  |                                                                                      | A/T | 01q | T | 0.472222222 | 0.485294118 | 0.41064  |

|            |           |     |     |   |             |             |          |
|------------|-----------|-----|-----|---|-------------|-------------|----------|
| rs2155633  |           | A/G | 11q | G | 0.181818182 | 0.153153153 | 0.410701 |
| rs1053926  | PTPLA     | C/T | 10p | T | 0.263392857 | 0.227678571 | 0.410878 |
| rs2072315  |           | A/G | 05q | G | 0.383928571 | 0.424107143 | 0.411117 |
| rs3740861  | ENDOD1    | A/C | 11q | A | 0.28125     | 0.316964286 | 0.411157 |
| rs2007506  | ZNF208    | A/G | 19p | G | 0.423423423 | 0.464285714 | 0.411157 |
| rs2947594  | C10orf120 | C/T | 10q | C | 0.276785714 | 0.241071429 | 0.411232 |
| rs3764779  | B4GALT4   | C/G | 03q | G | 0.243119266 | 0.210280374 | 0.41134  |
| rs2294759  | VNN3      | A/G | 06q | G | 0.366071429 | 0.328828829 | 0.411765 |
| rs4823540  |           | C/T | 22q | T | 0.276785714 | 0.310810811 | 0.411922 |
| rs1372325  | ACTA2     | A/G | 10q | G | 0.405       | 0.443298969 | 0.411943 |
| rs2961144  | OR2A5     | A/G | 07q | G | 0.285714286 | 0.321428571 | 0.412241 |
| rs2306331  | AP4E1     | C/T | 15q | C | 0.450892857 | 0.410714286 | 0.412354 |
| rs4804078  |           | A/C | 19p | A | 0.213636364 | 0.245535714 | 0.41241  |
| rs449937   |           | C/T | 11p | C | 0.227678571 | 0.196428571 | 0.412504 |
| rs2294689  | TTRAP     | C/G | 06p | G | 0.0625      | 0.044642857 | 0.412623 |
| rs894157   | C15orf42  | C/T | 15q | C | 0.084821429 | 0.107142857 | 0.412634 |
| rs963075   | SERPINB10 | A/G | 18q | A | 0.303571429 | 0.272321429 | 0.412808 |
| rs689647   | TP53BP1   | C/T | 15q | T | 0.142857143 | 0.117117117 | 0.412811 |
| rs289844   | LOC727840 | C/T | 02q | T | 0.129464286 | 0.15625     | 0.412853 |
| rs11084495 | LOC731151 | C/T | 19q | T | 0.429245283 | 0.391509434 | 0.412924 |
| rs10755864 |           | C/T | 07q | T | 0.31981982  | 0.359090909 | 0.412965 |
| rs2243518  | CDH17     | A/G | 08q | A | 0.223214286 | 0.191964286 | 0.412971 |
| rs292539   |           | C/G | 07q | G | 0.272321429 | 0.236607143 | 0.413022 |
| rs3736781  | BTN1A1    | A/G | 06p | A | 0.495454546 | 0.464285714 | 0.413044 |
| rs273957   | CREB3L2   | C/T | 07q | C | 0.383928571 | 0.345454545 | 0.413181 |
| rs7431184  |           | C/T | 03p | C | 0.09375     | 0.116071429 | 0.413216 |
| rs6859959  |           | A/T | 05q | A | 0.315       | 0.347826087 | 0.413329 |
| rs8012     | GCDH      | A/G | 19p | A | 0.419642857 | 0.459459459 | 0.413399 |
| rs2802808  | NFASC     | C/G | 01q | G | 0.306306306 | 0.342342342 | 0.413477 |
| rs6048760  | GZF1      | A/C | 20p | C | 0.441964286 | 0.482142857 | 0.413756 |
| rs2614668  | AKAP13    | C/T | 15q | T | 0.058035714 | 0.076576577 | 0.413933 |
| rs2424800  |           | G/T | 20q | G | 0.495327103 | 0.462962963 | 0.414119 |
| rs7797838  |           | C/G | 07q | G | 0.328703704 | 0.291666667 | 0.41433  |
| rs3810151  | ZNF526    | A/G | 19q | G | 0.107142857 | 0.084821429 | 0.414459 |
| rs4964026  |           | C/G | 12p | G | 0.196428571 | 0.227678571 | 0.414471 |
| rs1135056  | COL9A1    | A/G | 06q | G | 0.412037037 | 0.448113208 | 0.414611 |
| rs286299   | LOC401898 | G/T | 19p | T | 0.15625     | 0.129464286 | 0.414669 |

|            |                     |     |     |   |             |             |          |
|------------|---------------------|-----|-----|---|-------------|-------------|----------|
| rs1164671  |                     | A/G | 11p | G | 0.15625     | 0.184684685 | 0.415292 |
| rs10512243 | C9orf102            | C/T | 09q | T | 0.094736842 | 0.120879121 | 0.415479 |
| rs11250238 | IDI1, C10orf110     | C/T | 10p | T | 0.081081081 | 0.102678571 | 0.4157   |
| rs2227275  | MATN4               | A/G | 20q | A | 0.272727273 | 0.240909091 | 0.415964 |
| rs208753   | PCM1                | A/G | 08p | A | 0.232142857 | 0.200892857 | 0.416052 |
| rs494357   | RAP1A               | C/T | 01p | T | 0.086538462 | 0.112149533 | 0.416131 |
| rs3744307  | SLC16A6             | A/C | 17q | C | 0.165178571 | 0.138392857 | 0.416262 |
| rs11564620 | PLA2G4C             | A/C | 19q | C | 0.09009009  | 0.111607143 | 0.416266 |
| rs4935502  | PCDH15              | G/T | 10q | G | 0.102941176 | 0.126213592 | 0.416323 |
| rs8107220  | LOC284395           | A/G | 19q | A | 0.116071429 | 0.09375     | 0.416413 |
| rs2516489  |                     | A/G | 06p | A | 0.207207207 | 0.175675676 | 0.416558 |
| rs11223168 | CNTN5               | A/G | 11q | G | 0.058035714 | 0.077272727 | 0.416665 |
| rs2072671  | CDA                 | A/C | 01p | C | 0.342342342 | 0.379464286 | 0.41672  |
| rs3177483  |                     | A/G | 03p | A | 0.116071429 | 0.142857143 | 0.416764 |
| rs238209   | ZNFX1               | C/T | 20q | C | 0.207207207 | 0.241071429 | 0.416871 |
| rs4968849  | ABCA10              | A/G | 17q | A | 0.277272727 | 0.315315315 | 0.416943 |
| rs344560   | TNFSF14             | A/G | 19p | A | 0.068807339 | 0.049019608 | 0.417329 |
| rs2584021  |                     | A/G | 12q | A | 0.102678571 | 0.080357143 | 0.417356 |
| rs1926447  | CPB2                | C/T | 13q | T | 0.25        | 0.283783784 | 0.417441 |
| rs15895    | OAS2                | C/T | 12q | T | 0.373873874 | 0.339449541 | 0.41804  |
| rs8192707  |                     | A/G | 20q | G | 0.125       | 0.151785714 | 0.418224 |
| rs1982074  | KRI1                | C/T | 19p | C | 0.200892857 | 0.169642857 | 0.418518 |
| rs6518223  | C21orf86            | C/T | 21q | C | 0.486607143 | 0.450892857 | 0.418941 |
| rs3094806  | LOC440776           | A/C | 21q | A | 0.191964286 | 0.162162162 | 0.419018 |
| rs2071543  | PSMB8, TAP1         | A/C | 06p | A | 0.128440367 | 0.102803738 | 0.419526 |
| rs414743   | ADARB1, hCG_401283, |     |     |   |             |             |          |
| rs2291895  | LOC732307           | A/G | 21q | A | 0.283783784 | 0.321428571 | 0.419663 |
| rs10783528 | BCAT1               | C/G | 12p | G | 0.142857143 | 0.117117117 | 0.419844 |
| rs2294047  | KRT77               | C/T | 12q | T | 0.375       | 0.414414414 | 0.419869 |
| rs8192284  | PDLIM2              | C/T | 08p | T | 0.424107143 | 0.383928571 | 0.419941 |
| rs949493   | IL6R                | A/C | 01q | C | 0.441964286 | 0.40625     | 0.420451 |
| rs1063412  | STAU2               | C/T | 08q | C | 0.0625      | 0.084821429 | 0.420932 |
| rs2071563  | PIGC, C1orf105      | C/T | 01q | C | 0.433035714 | 0.396396396 | 0.421021 |
| rs448740   | KRT32               | C/T | 17q | T | 0.364864865 | 0.401785714 | 0.421363 |
| rs2232386  | FCGR3B, LOC652578   | C/T | 01q | T | 0.285714286 | 0.3125      | 0.4214   |
| rs1689742  | KRT75               | C/G | 12q | G | 0.118181818 | 0.095454546 | 0.421445 |
|            |                     | C/G | 05p | C | 0.486486487 | 0.477272727 | 0.421498 |

|            |                      |     |     |   |             |             |          |
|------------|----------------------|-----|-----|---|-------------|-------------|----------|
| rs6546837  | ALMS1                | C/G | 02p | C | 0.27027027  | 0.23853211  | 0.422261 |
| rs40401    | IL3                  | C/T | 05q | T | 0.236607143 | 0.202702703 | 0.422369 |
| rs1673408  | PKHD1L1              | G/T | 08q | T | 0.459821429 | 0.5         | 0.422395 |
| rs2271077  | GALNTL2              | C/T | 03p | T | 0.053571429 | 0.071428571 | 0.422734 |
| rs1046974  | SAG                  | A/G | 02q | A | 0.45        | 0.495495495 | 0.422747 |
| rs9897031  | KRTAP4-14, LOC653240 | C/T | 17q | C | 0.227678571 | 0.200892857 | 0.422844 |
| rs35213    | CDH11                | A/C | 16q | A | 0.209090909 | 0.178571429 | 0.422998 |
| rs32857    | DP58                 | C/T | 05q | T | 0.15625     | 0.130630631 | 0.423118 |
| rs4884207  |                      | C/T | 13q | T | 0.330357143 | 0.369369369 | 0.423393 |
| rs3810813  | BTBD12               | A/G | 16p | A | 0.071428571 | 0.053571429 | 0.42376  |
| rs2276315  |                      | A/G | 18q | A | 0.139423077 | 0.166666667 | 0.423786 |
| rs999813   | KIAA1683             | G/T | 19p | T | 0.486607143 | 0.450450451 | 0.423868 |
| rs9705036  |                      | C/T | 11p | T | 0.299107143 | 0.334821429 | 0.424006 |
| rs680055   | CYP3A43              | C/G | 07q | C | 0.053571429 | 0.071428571 | 0.424015 |
| rs1440331  |                      | A/C | 18q | A | 0.258928571 | 0.290178571 | 0.424026 |
| rs3189030  | NRAP                 | C/T | 10q | T | 0.303571429 | 0.267857143 | 0.424277 |
| rs627441   | DLAT                 | A/G | 11q | G | 0.383928571 | 0.418181818 | 0.424403 |
| rs3734838  | TRIM31               | A/G | 06p | A | 0.111607143 | 0.09009009  | 0.424414 |
| rs2273779  | PRG4                 | A/G | 01q | A | 0.357142857 | 0.392857143 | 0.424556 |
| rs10804117 | ALS2CR11             | A/T | 02q | T | 0.408256881 | 0.45        | 0.424753 |
| rs15911    | CTBS                 | C/T | 01p | T | 0.247747748 | 0.21875     | 0.424771 |
| rs7241075  | OSBPL1A              | C/T | 18q | T | 0.196428571 | 0.166666667 | 0.424827 |
| rs2105117  | LCE5A                | C/T | 01q | C | 0.401785714 | 0.366071429 | 0.424977 |
| rs1983346  | NDC80                | C/G | 18p | C | 0.25        | 0.216216216 | 0.425201 |
| rs7550055  |                      | G/T | 01q | G | 0.232142857 | 0.265765766 | 0.425357 |
| rs664850   |                      | C/T | 09q | C | 0.21875     | 0.189189189 | 0.425615 |
| rs7117260  | OR51S1               | A/C | 11p | A | 0.454545454 | 0.407216495 | 0.425626 |
| rs6483617  | NAV2                 | A/G | 11p | A | 0.276785714 | 0.310810811 | 0.425896 |
| rs1044141  | STK17A               | A/G | 07p | A | 0.241071429 | 0.209821429 | 0.426041 |
| rs4788591  | PKD1L3               | A/G | 16q | A | 0.222727273 | 0.191964286 | 0.42618  |
| rs2746325  | FLJ44005             | A/G | 01q | A | 0.191964286 | 0.220720721 | 0.426335 |
| rs743920   | EMID1                | C/G | 22q | C | 0.138392857 | 0.116071429 | 0.426505 |
| rs2275438  | C10orf4              | C/G | 10q | C | 0.485981308 | 0.449074074 | 0.426566 |
| rs2108673  |                      | C/T | 07q | T | 0.308035714 | 0.346846847 | 0.426566 |
| rs2839227  | PCNT                 | A/G | 21q | G | 0.117117117 | 0.142857143 | 0.426626 |
| rs459552   | APC                  | A/T | 05q | A | 0.227678571 | 0.196428571 | 0.42675  |
| rs164365   | SLC5A8               | A/C | 12q | A | 0.196428571 | 0.225225225 | 0.426809 |



|            |                 |     |     |   |             |             |          |
|------------|-----------------|-----|-----|---|-------------|-------------|----------|
| rs11612613 |                 | C/T | 12q | T | 0.200892857 | 0.232142857 | 0.426982 |
| rs1156287  | STXBP4          | C/T | 17q | C | 0.285714286 | 0.254464286 | 0.426987 |
| rs1877273  |                 | C/T | 16q | T | 0.125       | 0.148648649 | 0.427093 |
| rs3792594  | PDCD6IP         | C/T | 03p | T | 0.232142857 | 0.200892857 | 0.427285 |
| rs8027194  | BCL8            | A/G | 15q | A | 0.321428571 | 0.346846847 | 0.427794 |
| rs4842838  | ADAMTSL3        | G/T | 15q | G | 0.418918919 | 0.455357143 | 0.427869 |
| rs1184626  | ST6GALNAC3      | A/C | 01p | A | 0.4375      | 0.401785714 | 0.427953 |
| rs6545911  |                 | C/T | 02p | C | 0.151785714 | 0.125       | 0.428141 |
| rs2363681  | FHIT            | C/T | 03p | T | 0.397321429 | 0.433035714 | 0.428317 |
| rs874808   | DNAH8           | C/T | 06p | T | 0.369369369 | 0.40625     | 0.428354 |
| rs2882676  | ACAN            | G/T | 15q | T | 0.311926606 | 0.348623853 | 0.428702 |
| rs3733391  | MAP9            | A/G | 04q | A | 0.169724771 | 0.201834862 | 0.42878  |
| rs240736   | COL12A1         | C/T | 06q | C | 0.310810811 | 0.274774775 | 0.428887 |
| rs11096964 | FAM114A1        | A/G | 04p | A | 0.25        | 0.285714286 | 0.429077 |
| rs11944159 | FAM114A1        | C/T | 04p | C | 0.25        | 0.285714286 | 0.429077 |
| rs6185     | GNRH1           | C/G | 08p | C | 0.279279279 | 0.247747748 | 0.429202 |
| rs7021572  | C9orf138        | C/T | 09p | T | 0.306306306 | 0.272321429 | 0.429202 |
| rs4752761  |                 | C/T | 11p | T | 0.274774775 | 0.308035714 | 0.429382 |
| rs2740583  | PCDHB8, PCDHB16 | C/T | 05q | C | 0.357142857 | 0.321428571 | 0.429613 |
| rs7537937  | GBP2            | C/G | 01p | G | 0.334821429 | 0.369369369 | 0.429745 |
| rs7260518  | KIAA1881        | C/T | 19p | T | 0.135514019 | 0.111111111 | 0.429775 |
| rs10763975 | C10orf112       | A/G | 10p | G | 0.155963303 | 0.128440367 | 0.429802 |
| rs1972977  | AADACL2         | A/C | 03q | C | 0.330357143 | 0.366071429 | 0.429823 |
| rs2304053  | FAT2            | A/G | 05q | G | 0.449541284 | 0.486111111 | 0.429849 |
| rs2296942  |                 | A/C | 09q | C | 0.428571429 | 0.392857143 | 0.429866 |
| rs739999   | RGS11           | A/G | 16p | G | 0.121621622 | 0.147321429 | 0.430175 |
| rs2298720  | SLC14A1         | C/T | 18q | T | 0.077272727 | 0.060185185 | 0.430269 |
| rs11876    | NTHL1, SLC9A3R2 | C/T | 16p | T | 0.184684685 | 0.213636364 | 0.430303 |
| rs3883305  | LOC644397       | A/G | 17q | A | 0.214285714 | 0.184684685 | 0.430356 |
| rs7246856  | ZNF749          | G/T | 19q | T | 0.392473118 | 0.431578947 | 0.430589 |
| rs963981   | KIAA1804        | A/C | 01q | C | 0.214285714 | 0.183035714 | 0.430671 |
| rs11074471 | THUMPD1         | A/C | 16p | A | 0.160714286 | 0.1875      | 0.430987 |
| rs735295   | CCDC77          | C/T | 12p | C | 0.236111111 | 0.268181818 | 0.431013 |
| rs741445   | ZNF507          | A/C | 19q | A | 0.290178571 | 0.324324324 | 0.431163 |
| rs13021    | PNN             | A/G | 14q | G | 0.098214286 | 0.120535714 | 0.431232 |
| rs1049544  | SPARCL1         | C/G | 04q | G | 0.373873874 | 0.342342342 | 0.431355 |
| rs11147976 | C13orf3         | C/T | 13q | C | 0.125       | 0.102678571 | 0.431499 |

|            |              |     |     |   |             |             |          |
|------------|--------------|-----|-----|---|-------------|-------------|----------|
| rs11147977 | C13orf3      | A/G | 13q | A | 0.125       | 0.102678571 | 0.431499 |
| rs10876328 |              | A/G | 12q | A | 0.184684685 | 0.157657658 | 0.431516 |
| rs3783290  | C14orf49     | G/T | 14q | G | 0.391891892 | 0.357142857 | 0.431646 |
| rs2291219  | RPESP        | A/G | 08q | A | 0.28125     | 0.25        | 0.432123 |
| rs3733699  | PCDHB3       | A/T | 05q | A | 0.2         | 0.169642857 | 0.432207 |
| rs1551118  | C12orf64     | A/G | 12q | G | 0.231132076 | 0.195454546 | 0.43221  |
| rs11738216 |              | C/T | 05q | T | 0.231182796 | 0.197802198 | 0.432675 |
| rs10864219 | USH2A        | A/G | 01q | G | 0.441964286 | 0.481981982 | 0.432725 |
| rs11921691 | ZDHHC23      | A/G | 03q | A | 0.466666667 | 0.495283019 | 0.433142 |
| rs2708943  | IL1F7        | C/G | 02q | G | 0.070093458 | 0.051401869 | 0.433409 |
| rs2290207  | TNS4         | A/G | 17q | A | 0.263392857 | 0.22972973  | 0.433458 |
| rs4079366  | CYP2A7       | A/G | 19q | A | 0.213636364 | 0.23853211  | 0.433698 |
| rs5063     | NPPA         | A/G | 01p | A | 0.071428571 | 0.053571429 | 0.433959 |
| rs375556   |              | C/G | 06p | C | 0.428571429 | 0.463963964 | 0.433966 |
| rs2822558  |              | A/G | 21q | A | 0.142857143 | 0.169642857 | 0.434291 |
| rs3829658  | SIGLEC12     | C/T | 19q | C | 0.308035714 | 0.34375     | 0.434624 |
| rs1254445  |              | C/G | 07q | G | 0.272321429 | 0.238738739 | 0.434672 |
| rs2979109  |              | C/T | 08q | C | 0.418918919 | 0.383928571 | 0.434703 |
| rs2883247  |              | A/G | 01q | G | 0.122727273 | 0.148648649 | 0.434797 |
| rs1561736  | FLJ11184     | C/T | 04q | C | 0.373873874 | 0.351351351 | 0.43512  |
| rs2048741  |              | A/G | 09q | A | 0.414414414 | 0.379464286 | 0.435621 |
| rs941048   | FLJ22655     | C/T | 12p | C | 0.113636364 | 0.138392857 | 0.435711 |
| rs6477532  |              | G/T | 09q | G | 0.410714286 | 0.373873874 | 0.435917 |
| rs139297   | APOBEC3H     | C/G | 22q | C | 0.433035714 | 0.46875     | 0.436375 |
| rs3747787  | AIM1         | C/T | 06q | C | 0.245535714 | 0.276785714 | 0.436471 |
| rs4237190  | TRIM14, NANS | A/G | 09q | G | 0.445945946 | 0.482142857 | 0.436943 |
| rs2241481  |              | C/T | 04p | T | 0.361607143 | 0.324324324 | 0.437305 |
| rs2826246  |              | G/T | 21q | T | 0.260416667 | 0.295698925 | 0.437314 |
| rs7937237  | OR51B2       | C/G | 11p | C | 0.084821429 | 0.107142857 | 0.437403 |
| rs11114486 | PTPRQ        | A/C | 12q | C | 0.285714286 | 0.316964286 | 0.437557 |
| rs203717   | LOC147710    | C/T | 19q | T | 0.205357143 | 0.175675676 | 0.437785 |
| rs4987682  | TRPV6        | C/T | 07q | C | 0.053571429 | 0.071428571 | 0.437897 |
| rs5753105  | LOC550631    | C/G | 22q | C | 0.209821429 | 0.241071429 | 0.437932 |
| rs7932325  |              | A/G | 11p | G | 0.129464286 | 0.15625     | 0.437951 |
| rs1278942  |              | C/T | 14q | C | 0.209821429 | 0.241071429 | 0.438196 |
| rs10768157 |              | A/C | 11p | A | 0.355855856 | 0.390909091 | 0.438273 |
| rs2947865  |              | C/T | 17q | T | 0.362385321 | 0.325242718 | 0.438296 |

|            |                  |     |     |   |             |             |          |
|------------|------------------|-----|-----|---|-------------|-------------|----------|
| rs847955   |                  | A/G | 07p | G | 0.22972973  | 0.258928571 | 0.438306 |
| rs4322814  |                  | A/G | 02p | A | 0.160714286 | 0.1875      | 0.43834  |
| rs7202826  | LOC646939        | A/C | 16p | C | 0.415178571 | 0.450450451 | 0.438503 |
| rs2229113  | IL10RA           | A/G | 11q | A | 0.272321429 | 0.306306306 | 0.438766 |
| rs6843900  | UGT2B28          | G/T | 04q | T | 0.348214286 | 0.324324324 | 0.438979 |
| rs139302   | APOBEC3H         | C/G | 22q | C | 0.433035714 | 0.468468468 | 0.439071 |
| rs10431277 |                  | A/G | 12p | A | 0.258928571 | 0.227678571 | 0.439258 |
| rs2219898  | CSMD3            | A/G | 08q | G | 0.274774775 | 0.309090909 | 0.439421 |
| rs757262   | TRIM40           | A/G | 06p | A | 0.24        | 0.272277228 | 0.43966  |
| rs1880024  | C4orf23          | C/T | 04p | T | 0.379464286 | 0.34375     | 0.43974  |
| rs1046248  | BDKRB2           | C/T | 14q | T | 0.099099099 | 0.077981651 | 0.439838 |
| rs1138358  | BCL2A1           | G/T | 15q | G | 0.276785714 | 0.245535714 | 0.439936 |
| rs7536561  | LHX4             | A/G | 01q | A | 0.476851852 | 0.485576923 | 0.440445 |
| rs2070446  | Rgr              | C/T | 22q | C | 0.290178571 | 0.258928571 | 0.440615 |
| rs2278106  | EPHA7            | A/G | 06q | A | 0.066964286 | 0.05        | 0.440623 |
| rs7203042  | LOC646939        | C/T | 16p | C | 0.419642857 | 0.455357143 | 0.441042 |
| rs793440   | FILIP1L, C3orf26 | C/T | 03q | T | 0.334862385 | 0.302752294 | 0.441152 |
| rs1364261  |                  | A/G | 16q | A | 0.086363636 | 0.067567568 | 0.441159 |
| rs5998478  | BPIL2            | A/G | 22q | A | 0.481981982 | 0.445945946 | 0.441191 |
| rs7306642  | STAB2            | A/C | 12q | A | 0.071428571 | 0.053571429 | 0.441289 |
| rs12366671 | AKAP3            | A/G | 12p | G | 0.111607143 | 0.135135135 | 0.441374 |
| rs1243469  | RNASE7           | C/T | 14q | C | 0.130630631 | 0.107142857 | 0.441556 |
| rs557491   | ABCA5            | C/T | 17q | T | 0.459821429 | 0.5         | 0.441582 |
| rs10407682 |                  | A/G | 19p | A | 0.310679612 | 0.272277228 | 0.441583 |
| rs3740526  | MMS19            | A/G | 10q | A | 0.458762887 | 0.414141414 | 0.441712 |
| rs184967   | MSH3             | A/G | 05q | A | 0.157657658 | 0.133928571 | 0.442009 |
| rs6784389  | ZPLD1            | A/G | 03q | G | 0.135135135 | 0.111607143 | 0.442061 |
| rs44058    |                  | A/T | 05q | A | 0.327272727 | 0.359813084 | 0.442078 |
| rs3795374  | KIAA1804         | A/C | 01q | A | 0.213636364 | 0.183035714 | 0.442116 |
| rs2653601  | C11orf16         | A/G | 11p | A | 0.313636364 | 0.348214286 | 0.442141 |
| rs4149965  | EXO1             | A/G | 01q | A | 0.265765766 | 0.234234234 | 0.442193 |
| rs2020865  | FMO2             | G/T | 01q | G | 0.054054054 | 0.072072072 | 0.4422   |
| rs4269454  | MUC17            | C/T | 07q | C | 0.130630631 | 0.107142857 | 0.442364 |
| rs3797005  |                  | A/G | 04q | G | 0.378378378 | 0.415178571 | 0.442448 |
| rs7867847  |                  | C/T | 09p | T | 0.241071429 | 0.209821429 | 0.442625 |
| rs9891498  |                  | A/G | 17q | G | 0.388392857 | 0.424107143 | 0.442877 |
| rs10459477 | LOC643332        | A/G | 14q | A | 0.276785714 | 0.308035714 | 0.442951 |

|            |                     |     |     |   |             |             |          |
|------------|---------------------|-----|-----|---|-------------|-------------|----------|
| rs10839616 | OR2AG2              | C/G | 11p | G | 0.198198198 | 0.227272727 | 0.442993 |
| rs1818     | TGS1, TMEM68        | C/T | 08q | T | 0.107142857 | 0.129464286 | 0.443091 |
| rs1025806  | KIAA0494, LOC374973 | A/G | 01p | A | 0.294642857 | 0.263392857 | 0.443097 |
| rs1152888  | IRAK3               | A/G | 12q | A | 0.081081081 | 0.063063063 | 0.443156 |
| rs11738161 |                     | C/T | 05q | T | 0.252252252 | 0.223214286 | 0.443163 |
| rs6511739  |                     | C/G | 19p | C | 0.135135135 | 0.160714286 | 0.443196 |
| rs952719   | LOC152663           | A/C | 04q | A | 0.107142857 | 0.129464286 | 0.443207 |
| rs615381   | RNF212              | A/G | 04p | G | 0.121621622 | 0.099099099 | 0.443366 |
| rs12091750 | PLEKHM2             | C/T | 01p | C | 0.232142857 | 0.263392857 | 0.443446 |
| rs7818806  |                     | A/G | 08q | A | 0.211711712 | 0.183486238 | 0.443768 |
| rs1227051  | CDH23               | C/T | 10q | C | 0.166666667 | 0.196428571 | 0.443772 |
| rs1944270  | SERPINB8            | C/T | 18q | T | 0.267857143 | 0.300925926 | 0.443893 |
| rs1982151  | RMI1                | A/G | 09q | A | 0.287037037 | 0.25        | 0.444146 |
| rs2703806  | SPECC1              | A/T | 17p | A | 0.414141414 | 0.37745098  | 0.44415  |
| rs8107444  | ZNF28, ZNF320       | A/G | 19q | A | 0.094594595 | 0.117117117 | 0.444182 |
| rs921027   |                     | C/G | 05q | C | 0.419642857 | 0.383928571 | 0.444264 |
| rs2291157  | EVC                 | G/T | 04p | G | 0.075892857 | 0.098214286 | 0.444311 |
| rs4629585  | FLJ41603            | A/C | 05q | C | 0.339285714 | 0.303571429 | 0.444343 |
| rs10989589 | GRIN3A              | C/T | 09q | T | 0.397321429 | 0.433035714 | 0.4444   |
| rs3110234  | LIFR                | C/T | 05p | T | 0.184684685 | 0.214953271 | 0.444493 |
| rs2920048  | ZFPM2               | C/G | 08q | C | 0.15625     | 0.183035714 | 0.44452  |
| rs12146709 | CAPRIN2             | C/T | 12p | C | 0.267857143 | 0.236607143 | 0.444562 |
| rs1060896  | SLC28A2             | A/C | 15q | C | 0.361607143 | 0.397321429 | 0.444747 |
| rs4796555  | FBXO39              | C/T | 17p | T | 0.245454546 | 0.21559633  | 0.44485  |
| rs704326   | CACNA1E             | C/T | 01q | T | 0.455357143 | 0.419642857 | 0.44493  |
| rs2248609  | MGC39715            | A/G | 08q | G | 0.315315315 | 0.348214286 | 0.444966 |
| rs2361503  | LOC339766           | A/G | 02q | A | 0.432432432 | 0.468181818 | 0.445083 |
| rs1359992  |                     | A/T | 09q | T | 0.348214286 | 0.316964286 | 0.445104 |
| rs8118712  |                     | A/C | 20q | A | 0.231818182 | 0.258928571 | 0.445503 |
| rs670139   |                     | A/C | 11q | A | 0.415178571 | 0.379464286 | 0.445902 |
| rs458017   | REV3L               | C/T | 06q | C | 0.0625      | 0.081081081 | 0.446079 |
| rs4586516  |                     | C/G | 17q | G | 0.183035714 | 0.15625     | 0.446441 |
| rs2232950  | SCGB1D2             | C/T | 11q | T | 0.316964286 | 0.283783784 | 0.446704 |
| rs3742264  | CPB2                | C/T | 13q | T | 0.351851852 | 0.319047619 | 0.44696  |
| rs5744463  | CD180               | C/G | 05q | C | 0.089285714 | 0.111607143 | 0.447012 |
| rs7242964  |                     | C/G | 18p | C | 0.220183486 | 0.25        | 0.447015 |
| rs2973558  | RGNEF               | G/T | 05q | T | 0.330357143 | 0.294642857 | 0.447034 |

|            |                 |     |     |   |             |             |          |
|------------|-----------------|-----|-----|---|-------------|-------------|----------|
| rs388706   | ZNF45           | C/T | 19q | C | 0.482142857 | 0.446428571 | 0.447086 |
| rs343376   | FOXJ3           | C/T | 01p | T | 0.207207207 | 0.178571429 | 0.447173 |
| rs2243525  | LGALS8          | C/G | 01q | G | 0.267857143 | 0.297297297 | 0.447222 |
| rs11072170 | FMN1            | C/T | 15q | T | 0.379464286 | 0.415178571 | 0.447288 |
| rs549148   | INSL5           | A/T | 01p | T | 0.163265306 | 0.195       | 0.447354 |
| rs1071600  | MYOM1           | C/T | 18p | C | 0.129464286 | 0.15625     | 0.447715 |
| rs2018721  | SETD4           | C/T | 21q | C | 0.28125     | 0.25        | 0.44773  |
| rs11567855 |                 | A/G | 07q | A | 0.433035714 | 0.397321429 | 0.447897 |
| rs2291189  | SLFN5           | C/T | 17q | T | 0.053571429 | 0.071428571 | 0.447975 |
| rs12520809 | C5orf20         | C/T | 05q | C | 0.45045045  | 0.486238532 | 0.448063 |
| rs7825     | OVGP1           | C/G | 01p | G | 0.388392857 | 0.423423423 | 0.448286 |
| rs6662382  | OR10T2          | C/T | 01q | C | 0.316964286 | 0.285714286 | 0.448333 |
| rs1737145  | C6orf167        | A/G | 06q | G | 0.440909091 | 0.477477478 | 0.448335 |
| rs7494244  | C14orf162       | A/T | 14q | A | 0.201834862 | 0.171171171 | 0.448403 |
| rs1893523  | KIAA1632        | A/G | 18q | A | 0.13963964  | 0.165178571 | 0.448613 |
| rs6907125  | GPR111          | A/G | 06p | A | 0.35        | 0.381818182 | 0.448629 |
| rs1826028  | FLJ31033        | A/C | 04q | C | 0.283783784 | 0.247747748 | 0.448822 |
| rs1801058  | GRK4            | C/T | 04p | T | 0.459821429 | 0.422727273 | 0.448834 |
| rs754224   | C1orf142        | G/T | 01q | T | 0.171171171 | 0.2         | 0.448869 |
| rs400037   | AXIN1, PDIA2    | C/T | 16p | T | 0.200892857 | 0.174107143 | 0.448885 |
| rs1135093  | FLJ41603        | C/T | 05q | T | 0.241071429 | 0.209821429 | 0.448952 |
| rs11854184 | KIAA0256        | A/C | 15q | A | 0.225225225 | 0.193693694 | 0.448968 |
| rs4468717  | TGIF1           | A/G | 18p | A | 0.094594595 | 0.072727273 | 0.449082 |
| rs2233558  | OR2S2           | A/G | 09p | G | 0.348214286 | 0.310810811 | 0.449305 |
| rs766425   | FLJ46020        | A/C | 21q | A | 0.477678571 | 0.486607143 | 0.449317 |
| rs6820348  |                 | A/C | 04q | C | 0.166666667 | 0.13963964  | 0.449323 |
| rs1656922  | KNG1            | C/T | 03q | T | 0.45945946  | 0.495535714 | 0.449439 |
| rs3818831  | FLG2, LOC648187 | A/G | 01q | A | 0.172727273 | 0.144859813 | 0.449619 |
| rs2258470  | ANKRD38         | A/G | 01p | A | 0.288288288 | 0.254464286 | 0.449735 |
| rs3738952  | CUL3            | A/G | 02q | A | 0.098214286 | 0.075892857 | 0.449737 |
| rs1479500  | IFLTD1          | A/T | 12p | A | 0.169642857 | 0.142857143 | 0.449842 |
| rs11860456 | CES7            | A/C | 16q | C | 0.285714286 | 0.254464286 | 0.44985  |
| rs4261529  |                 | C/T | 16p | T | 0.316964286 | 0.285714286 | 0.449991 |
| rs231518   | MPP2            | A/G | 17q | A | 0.11682243  | 0.140776699 | 0.449993 |
| rs11228732 | OR9G1           | G/T | 11q | G | 0.263392857 | 0.288288288 | 0.450033 |
| rs7947780  | C11orf82        | G/T | 11q | T | 0.337837838 | 0.300925926 | 0.450124 |
| rs596783   | FLJ40194        | A/G | 17q | G | 0.220720721 | 0.195454546 | 0.450339 |

|            |                      |     |     |   |             |             |          |
|------------|----------------------|-----|-----|---|-------------|-------------|----------|
| rs11955611 | FLJ46010             | C/T | 05q | T | 0.223214286 | 0.254464286 | 0.450345 |
| rs7761731  | CYP39A1              | A/T | 06p | T | 0.210280374 | 0.240384615 | 0.450381 |
| rs2278170  |                      | C/T | 11p | T | 0.297029703 | 0.264423077 | 0.450629 |
| rs7163367  | LOC56964             | A/T | 15q | A | 0.415178571 | 0.450892857 | 0.450719 |
| rs11910627 | IFNGR2               | C/G | 21q | C | 0.272321429 | 0.241071429 | 0.450769 |
| rs1051006  | MADD                 | A/G | 11p | A | 0.183035714 | 0.15625     | 0.450923 |
| rs12187913 | PLAC8L1              | A/T | 05q | T | 0.301801802 | 0.27027027  | 0.45122  |
| rs4833513  |                      | C/T | 04q | C | 0.171171171 | 0.146788991 | 0.451349 |
| rs9677004  | ZNF530               | A/G | 19q | G | 0.13963964  | 0.165178571 | 0.451438 |
| rs7285167  | APOL2                | A/G | 22q | A | 0.066964286 | 0.049107143 | 0.451668 |
| rs1499280  | ITGA1, PELO          | G/T | 05q | G | 0.072916667 | 0.094059406 | 0.451806 |
| rs733731   | PGLYRP2              | A/G | 19p | A | 0.348214286 | 0.383928571 | 0.451967 |
| rs2466615  | OR8G2                | G/T | 11q | T | 0.477477477 | 0.486607143 | 0.452331 |
| rs1893566  | LOXHD1               | C/T | 18q | T | 0.169642857 | 0.142857143 | 0.452411 |
| rs10422064 | FSTL3, PRSSL1        | A/G | 19p | A | 0.200892857 | 0.227678571 | 0.452511 |
| rs2722372  | TXNDC3               | A/G | 07p | A | 0.23853211  | 0.268181818 | 0.452553 |
| rs11074359 | COQ7                 | C/T | 16p | C | 0.40625     | 0.370535714 | 0.452567 |
| rs3745764  | HKR1                 | A/G | 19q | A | 0.28125     | 0.25        | 0.452711 |
| rs3813922  |                      | A/C | 20q | A | 0.178571429 | 0.151785714 | 0.45291  |
| rs10510592 | NEK10                | C/T | 03p | C | 0.258928571 | 0.288288288 | 0.453369 |
| rs1741327  | SMOX                 | A/G | 20p | A | 0.321428571 | 0.357142857 | 0.453732 |
| rs3812054  | MEGF10               | C/T | 05q | T | 0.151785714 | 0.125       | 0.453896 |
| rs3747517  | IFIH1                | A/G | 02q | A | 0.265625    | 0.304597701 | 0.453897 |
| rs1641209  | LOC646762            | C/T | 07p | C | 0.34375     | 0.381818182 | 0.453922 |
| rs1641210  | LOC646762            | C/T | 07p | C | 0.34375     | 0.381818182 | 0.453922 |
| rs4862357  | LOC391722, LOC642076 | A/G | 04q | A | 0.339285714 | 0.375       | 0.454098 |
| rs2227271  | UBQLN3               | A/G | 11p | A | 0.334821429 | 0.370535714 | 0.454114 |
| rs9891146  | C17orf58             | C/T | 17q | T | 0.28125     | 0.310810811 | 0.454252 |
| rs2302588  | WDR21A               | C/G | 14q | G | 0.111607143 | 0.089285714 | 0.454279 |
| rs2288675  | ANP32C               | A/G | 04q | A | 0.491071429 | 0.472477064 | 0.454436 |
| rs1154400  | ADH5                 | C/T | 04q | C | 0.272321429 | 0.303571429 | 0.454467 |
| rs2168188  |                      | A/G | 15q | A | 0.211711712 | 0.241071429 | 0.454469 |
| rs3750206  | ZC3H3                | A/T | 08q | A | 0.181818182 | 0.150943396 | 0.454697 |
| rs9373985  | FHL5                 | C/G | 06q | G | 0.393203884 | 0.357142857 | 0.454923 |
| rs3811514  | SKIP                 | A/G | 02q | G | 0.495535714 | 0.46875     | 0.455031 |
| rs4980999  |                      | A/G | 12q | A | 0.121621622 | 0.098214286 | 0.455119 |
| rs8005834  | LOC728635, LOC731356 | C/G | 14q | G | 0.191964286 | 0.220720721 | 0.455384 |

|            |                  |     |     |   |             |             |          |
|------------|------------------|-----|-----|---|-------------|-------------|----------|
| rs1990760  | IFIH1            | C/T | 02q | C | 0.369369369 | 0.40625     | 0.455512 |
| rs702689   | MAP3K1           | A/G | 05q | G | 0.308035714 | 0.276785714 | 0.455513 |
| rs2292245  | PTPRG            | A/G | 03p | A | 0.1875      | 0.163636364 | 0.45567  |
| rs1050784  | KRT15            | A/G | 17q | A | 0.336363636 | 0.301801802 | 0.455672 |
| rs1995158  | OR52H1           | C/T | 11p | T | 0.183486239 | 0.211711712 | 0.45612  |
| rs3813227  | ALMS1            | C/T | 02p | T | 0.274774775 | 0.245535714 | 0.456155 |
| rs11853050 | FLJ39531         | C/T | 15q | T | 0.102678571 | 0.125       | 0.456161 |
| rs11682068 | OLA1             | A/G | 02q | G | 0.419642857 | 0.386363636 | 0.456216 |
| rs7556132  |                  | A/G | 01q | A | 0.45        | 0.414414414 | 0.456492 |
| rs3761203  |                  | G/T | 20q | T | 0.491071429 | 0.473214286 | 0.456495 |
| rs4501363  |                  | A/G | 05p | A | 0.334821429 | 0.301801802 | 0.456511 |
| rs3178519  |                  | C/G | 17q | C | 0.297297297 | 0.263392857 | 0.456781 |
| rs12312266 | PIK3C2G          | C/T | 12p | T | 0.234234234 | 0.205357143 | 0.456847 |
| rs374185   |                  | A/G | 19q | G | 0.355855856 | 0.321428571 | 0.456901 |
| rs2774960  | KIAA1549         | A/G | 07q | A | 0.352678571 | 0.316964286 | 0.457213 |
| rs10807372 | GPR111           | A/G | 06p | A | 0.352678571 | 0.383928571 | 0.457282 |
| rs226794   | ADAMTS5          | A/G | 21q | A | 0.102678571 | 0.125       | 0.457425 |
| rs614945   | RNF212           | G/T | 04p | T | 0.120535714 | 0.099099099 | 0.457448 |
| rs3811515  | SKIP             | G/T | 02q | G | 0.259090909 | 0.227678571 | 0.457492 |
| rs9320001  | PIGN             | C/G | 18q | G | 0.241071429 | 0.272321429 | 0.457494 |
| rs1670093  |                  | C/T | 15q | T | 0.297979798 | 0.322916667 | 0.457632 |
| rs9388768  | L3MBTL3          | A/C | 06q | C | 0.308411215 | 0.339449541 | 0.4577   |
| rs9615325  |                  | A/G | 22q | G | 0.330357143 | 0.299107143 | 0.457743 |
| rs1793174  | AMICA1           | A/G | 11q | A | 0.216216216 | 0.247747748 | 0.458025 |
| rs3088241  | PUS3, HYLS1      | C/G | 11q | C | 0.450892857 | 0.486607143 | 0.458095 |
| rs7168069  | ITGA11           | A/C | 15q | A | 0.174107143 | 0.200892857 | 0.458543 |
| rs9381594  | GPR111           | A/G | 06p | A | 0.355855856 | 0.387387387 | 0.45865  |
| rs10872670 | AKAP12           | A/G | 06q | A | 0.204545454 | 0.234234234 | 0.459017 |
| rs532598   | SEMA6D           | C/T | 15q | T | 0.328703704 | 0.365740741 | 0.45902  |
| rs10466659 | OR5B2            | A/G | 11q | G | 0.219626168 | 0.252380952 | 0.459131 |
| rs10904535 | DIP2C, C10orf108 | A/G | 10p | G | 0.094594595 | 0.116071429 | 0.459255 |
| rs310589   |                  | A/G | 07q | A | 0.375       | 0.40625     | 0.459324 |
| rs6858409  |                  | C/T | 04q | T | 0.166666667 | 0.142857143 | 0.459403 |
| rs801720   | CERK             | G/T | 22q | T | 0.382882883 | 0.418181818 | 0.459406 |
| rs7942047  | OR8D4            | C/T | 11q | T | 0.236607143 | 0.209821429 | 0.459416 |
| rs10848499 |                  | A/G | 12p | G | 0.383928571 | 0.419642857 | 0.459597 |
| rs958305   | ZNF607           | C/T | 19q | T | 0.209821429 | 0.18018018  | 0.459645 |

|            |                |     |     |   |             |             |          |
|------------|----------------|-----|-----|---|-------------|-------------|----------|
| rs1008001  |                | G/T | 02p | G | 0.09009009  | 0.111607143 | 0.459748 |
| rs8026898  |                | A/G | 15q | A | 0.245535714 | 0.274774775 | 0.459873 |
| rs2274802  | USP16          | A/T | 21q | T | 0.303571429 | 0.272321429 | 0.460182 |
| rs9303634  | WSB1           | C/T | 17p | C | 0.446428571 | 0.410714286 | 0.460304 |
| rs2113089  |                | C/T | 19p | T | 0.18018018  | 0.209821429 | 0.460444 |
| rs1964130  |                | C/G | 06q | G | 0.268181818 | 0.236607143 | 0.460697 |
| rs6664332  | OR2L13, OR2AK2 | A/G | 01q | A | 0.347222222 | 0.313084112 | 0.460783 |
| rs879368   | TBC1D2         | A/C | 09q | A | 0.227272727 | 0.258928571 | 0.460866 |
| rs5167     | APOC2, APOC4   | G/T | 19q | G | 0.360576923 | 0.328703704 | 0.460924 |
| rs4792147  | ALOX15B        | A/G | 17p | G | 0.472972973 | 0.491071429 | 0.460999 |
| rs1063743  | TACC3          | A/G | 04p | A | 0.245535714 | 0.214285714 | 0.461007 |
| rs4757627  |                | A/C | 11p | C | 0.490990991 | 0.454954955 | 0.461011 |
| rs740223   | LOC550631      | C/T | 22q | T | 0.222727273 | 0.254464286 | 0.461093 |
| rs1042704  | MMP14          | A/G | 14q | A | 0.200892857 | 0.227678571 | 0.461238 |
| rs3812619  | ECD            | C/T | 10q | T | 0.084821429 | 0.066964286 | 0.461481 |
| rs3735135  | CDC2L5         | C/T | 07p | C | 0.080357143 | 0.0625      | 0.461635 |
| rs614076   | LOC253820      | C/G | 03q | G | 0.366071429 | 0.334821429 | 0.462276 |
| rs6967117  | EPHA1          | C/T | 07q | T | 0.081818182 | 0.102678571 | 0.462419 |
| rs10839631 | OR10A2         | A/G | 11p | G | 0.40625     | 0.368181818 | 0.462523 |
| rs4445906  | ABCA17         | A/G | 16p | G | 0.292792793 | 0.325892857 | 0.462569 |
| rs3762872  | LOC732275      | C/T | 16q | T | 0.495049505 | 0.462765957 | 0.462695 |
| rs2298312  | C9orf131       | A/T | 09p | T | 0.080357143 | 0.0625      | 0.462848 |
| rs12648093 | NUDT6          | A/G | 04q | A | 0.254464286 | 0.285714286 | 0.462905 |
| rs1004588  | DGKG           | C/G | 03q | C | 0.453703704 | 0.490566038 | 0.463076 |
| rs6784362  | ZPLD1          | A/T | 03q | T | 0.133928571 | 0.111607143 | 0.463155 |
| rs3827318  | LOC51233       | A/G | 22q | G | 0.116071429 | 0.13963964  | 0.463205 |
| rs10440276 | FLJ45721       | C/T | 04p | T | 0.40625     | 0.441441441 | 0.463231 |
| rs3735781  |                | A/G | 08p | G | 0.383928571 | 0.418918919 | 0.463242 |
| rs8113341  | LOC388503      | A/G | 19p | A | 0.200892857 | 0.174107143 | 0.463244 |
| rs1790218  | SLC22A10       | A/G | 11q | G | 0.490196078 | 0.457943925 | 0.463246 |
| rs415895   | SWAP70         | C/G | 11p | G | 0.342342342 | 0.310810811 | 0.463246 |
| rs4927635  | SNTG2          | C/T | 02p | C | 0.482142857 | 0.446428571 | 0.463395 |
| rs6972158  | NPSR1, AAA1    | A/G | 07p | G | 0.328828829 | 0.361607143 | 0.463888 |
| rs542137   | ZAN            | C/G | 07q | C | 0.369369369 | 0.404545454 | 0.464131 |
| rs4924089  |                | A/G | 15q | G | 0.232142857 | 0.205357143 | 0.464345 |
| rs882709   | SETX           | C/G | 09q | G | 0.080357143 | 0.063063063 | 0.464518 |
| rs526680   | CLEC2A         | C/T | 12p | C | 0.316964286 | 0.348214286 | 0.464598 |



|            |                      |     |     |   |             |             |          |
|------------|----------------------|-----|-----|---|-------------|-------------|----------|
| rs6891976  |                      | A/G | 05q | G | 0.098214286 | 0.120535714 | 0.464929 |
| rs10199088 | MPHOSPH10            | A/C | 02p | C | 0.303571429 | 0.337837838 | 0.464931 |
| rs2003783  | KLK3                 | G/T | 19q | T | 0.09375     | 0.113636364 | 0.465023 |
| rs4140446  | MDN1                 | C/T | 06q | C | 0.195454545 | 0.169642857 | 0.465355 |
| rs2252784  | PTPRB                | A/G | 12q | A | 0.419642857 | 0.383928571 | 0.46553  |
| rs2231119  | HLA-A, HLA-A29.1     | A/T | 06p | A | 0.325892857 | 0.303571429 | 0.465559 |
| rs3816032  | RHPN2, C19orf40      | C/T | 19q | C | 0.107142857 | 0.129464286 | 0.465582 |
| rs446644   | DZIP1L               | C/T | 03q | T | 0.165178571 | 0.138392857 | 0.465593 |
| rs2068061  | ZNF224               | C/T | 19q | T | 0.143678161 | 0.170212766 | 0.465795 |
| rs2304748  | C8orf41              | C/T | 08p | T | 0.419642857 | 0.383928571 | 0.465796 |
| rs9889274  |                      | C/T | 17q | T | 0.112612613 | 0.133928571 | 0.465799 |
| rs1970473  |                      | A/C | 10q | C | 0.348214286 | 0.315315315 | 0.466052 |
| rs11756977 | DST                  | C/T | 06p | T | 0.290178571 | 0.321428571 | 0.466058 |
| rs7839934  | EPPK1                | C/G | 08q | C | 0.263392857 | 0.294642857 | 0.466296 |
| rs10999147 | H2AFY2, AIFM2        | A/G | 10q | G | 0.102678571 | 0.125       | 0.466309 |
| rs2918300  |                      | A/G | 19p | A | 0.381818182 | 0.415178571 | 0.466442 |
| rs1950902  | MTHFD1               | C/T | 14q | T | 0.174107143 | 0.148648649 | 0.466561 |
| rs2290213  | KIAA0241             | A/T | 07p | A | 0.111607143 | 0.135135135 | 0.46683  |
| rs2291827  | HSPG2                | A/G | 01p | A | 0.184684685 | 0.159090909 | 0.467421 |
| rs12672764 | LOC641858, LOC650172 | A/T | 07q | A | 0.28125     | 0.25        | 0.46747  |
| rs4683233  |                      | C/T | 03p | T | 0.25        | 0.223214286 | 0.467516 |
| rs5998406  |                      | A/C | 22q | C | 0.318181818 | 0.294642857 | 0.467655 |
| rs2243909  |                      | A/C | 10q | A | 0.196428571 | 0.223214286 | 0.467748 |
| rs943762   | SEC16B               | C/T | 01q | T | 0.098214286 | 0.120535714 | 0.467765 |
| rs8076139  |                      | C/G | 17q | G | 0.401785714 | 0.433035714 | 0.467783 |
| rs29911    |                      | A/G | 05q | A | 0.123853211 | 0.102678571 | 0.468044 |
| rs428785   | ADAMTS1              | C/G | 21q | C | 0.247663551 | 0.222727273 | 0.468401 |
| rs1572983  | BAAT                 | C/T | 09q | C | 0.321428571 | 0.290178571 | 0.468494 |
| rs1981898  | TTLL5                | A/C | 14q | C | 0.299107143 | 0.333333333 | 0.468525 |
| rs1984564  | MBOAT5               | C/T | 12p | C | 0.071428571 | 0.09009009  | 0.468945 |
| rs806325   | BCMS                 | G/T | 13q | G | 0.346846847 | 0.313636364 | 0.469078 |
| rs7042578  |                      | A/G | 09p | A | 0.267857143 | 0.299107143 | 0.46913  |
| rs1062798  | NUP62, IL411         | C/G | 19q | C | 0.433035714 | 0.397321429 | 0.469241 |
| rs7321489  |                      | A/G | 13q | A | 0.196428571 | 0.225225225 | 0.469416 |
| rs7076156  | ZNF365               | A/G | 10q | A | 0.303571429 | 0.272321429 | 0.469488 |
| rs10778292 |                      | C/T | 12q | C | 0.142857143 | 0.168181818 | 0.469575 |
| rs10138997 | FANCM                | C/T | 14q | T | 0.089285714 | 0.071428571 | 0.469595 |

|            |             |     |     |   |             |             |          |
|------------|-------------|-----|-----|---|-------------|-------------|----------|
| rs7998427  | SETDB2      | A/G | 13q | A | 0.299107143 | 0.334821429 | 0.469649 |
| rs3740862  | ENDOD1      | C/T | 11q | T | 0.071428571 | 0.053571429 | 0.469677 |
| rs2244438  | TRAK2       | A/G | 02q | A | 0.294642857 | 0.325892857 | 0.469715 |
| rs1683723  | TMEM132C    | A/G | 12q | A | 0.473214286 | 0.4375      | 0.47     |
| rs11682078 | OLA1        | A/G | 02q | G | 0.419642857 | 0.387387387 | 0.470012 |
| rs11187225 | EXOC6       | C/G | 10q | G | 0.112612613 | 0.135135135 | 0.470436 |
| rs11099592 | HPSE        | C/T | 04q | T | 0.219626168 | 0.188679245 | 0.470912 |
| rs819085   | FLJ35880    | C/T | 03q | C | 0.054054054 | 0.072072072 | 0.471097 |
| rs2066575  |             | A/T | 13q | A | 0.299107143 | 0.267857143 | 0.471632 |
| rs3134253  | WDSOF1      | A/G | 08q | G | 0.218181818 | 0.247747748 | 0.471747 |
| rs1866247  |             | A/C | 02q | A | 0.066964286 | 0.050458716 | 0.471823 |
| rs6008622  | GTSE1       | A/G | 22q | A | 0.099099099 | 0.120535714 | 0.472116 |
| rs9865     | NSUN4       | A/G | 01p | G | 0.121621622 | 0.145454546 | 0.472217 |
| rs2485652  | KLF17       | C/T | 01p | C | 0.411214953 | 0.377272727 | 0.472714 |
| rs4744122  | LOC138652   | C/T | 09q | C | 0.491071429 | 0.477477477 | 0.472872 |
| rs11557865 | KIAA1128    | C/T | 10q | C | 0.178571429 | 0.207207207 | 0.472975 |
| rs10509681 | CYP2C8      | C/T | 10q | C | 0.107142857 | 0.129464286 | 0.473141 |
| rs10904313 | LOC338588   | A/G | 10p | G | 0.455357143 | 0.418918919 | 0.473144 |
| rs6964587  | AKAP9       | G/T | 07q | T | 0.400900901 | 0.366071429 | 0.473351 |
| rs1936448  |             | G/T | 09p | T | 0.247747748 | 0.220720721 | 0.473418 |
| rs10508578 | RP11-49L2.2 | A/G | 10p | A | 0.102678571 | 0.125       | 0.473822 |
| rs1065761  | CHIT1       | C/G | 01q | G | 0.107142857 | 0.126126126 | 0.474413 |
| rs1801244  | ATP7B       | C/G | 13q | G | 0.473214286 | 0.495535714 | 0.474428 |
| rs2291905  |             | C/T | 03q | T | 0.245535714 | 0.21875     | 0.474552 |
| rs907609   | SYT8        | C/T | 11p | T | 0.175675676 | 0.151785714 | 0.474704 |
| rs977728   | TMPRSS11A   | C/T | 04q | T | 0.178571429 | 0.205357143 | 0.474722 |
| rs6942879  | FLJ16237    | A/C | 07p | C | 0.419642857 | 0.389908257 | 0.475001 |
| rs2023472  | TRIM31      | C/T | 06p | T | 0.339285714 | 0.308035714 | 0.475125 |
| rs7249743  | FCGBP       | C/T | 19q | C | 0.277227723 | 0.245098039 | 0.475166 |
| rs3897926  | PRHOXNB     | G/T | 13q | G | 0.388392857 | 0.423423423 | 0.47539  |
| rs8002725  | SCEL        | A/G | 13q | G | 0.202702703 | 0.22972973  | 0.475416 |
| rs4883918  | DIS3        | C/T | 13q | C | 0.261261261 | 0.294642857 | 0.475486 |
| rs10852985 | ANKFN1      | A/G | 17q | G | 0.28125     | 0.310810811 | 0.475624 |
| rs3128917  |             | G/T | 06p | G | 0.288990826 | 0.254901961 | 0.475756 |
| rs6736913  | EML4        | A/G | 02p | A | 0.057894737 | 0.075268817 | 0.475926 |
| rs1129055  | CD86        | A/G | 03q | A | 0.281818182 | 0.252252252 | 0.475963 |
| rs6136     | SELP        | A/C | 01q | C | 0.103603604 | 0.084821429 | 0.476015 |

|            |           |     |     |   |             |             |          |
|------------|-----------|-----|-----|---|-------------|-------------|----------|
| rs3735400  | ANLN      | C/G | 07p | C | 0.130630631 | 0.108108108 | 0.476312 |
| rs707745   | PSG1      | G/T | 19q | G | 0.217592593 | 0.242990654 | 0.476482 |
| rs1805329  | RAD23B    | C/T | 09q | T | 0.147321429 | 0.171171171 | 0.476561 |
| rs4072529  |           | A/T | 05p | A | 0.129464286 | 0.151785714 | 0.476612 |
| rs616114   | MEP1B     | A/G | 18q | A | 0.419642857 | 0.450892857 | 0.476904 |
| rs10868670 | C9orf79   | A/T | 09q | T | 0.495454545 | 0.468468469 | 0.476921 |
| rs329942   |           | C/T | 19q | T | 0.290178571 | 0.258928571 | 0.47725  |
| rs2295769  | SERPIN6   | C/T | 06p | C | 0.316964286 | 0.285714286 | 0.477887 |
| rs9827240  |           | A/T | 03q | A | 0.339285714 | 0.310810811 | 0.478086 |
| rs2270637  | SLC18A1   | C/G | 08p | G | 0.197247706 | 0.169724771 | 0.478195 |
| rs10852740 |           | G/T | 17q | T | 0.432432432 | 0.468181818 | 0.478214 |
| rs11882865 |           | A/G | 19p | A | 0.334821429 | 0.303571429 | 0.478228 |
| rs7162473  | HERC1     | C/G | 15q | C | 0.116071429 | 0.138392857 | 0.47826  |
| rs6987002  |           | A/G | 08p | A | 0.135135135 | 0.157657658 | 0.478328 |
| rs3816800  | ATP10A    | C/G | 15q | C | 0.459821429 | 0.428571429 | 0.478581 |
| rs9508     | ATPIF1    | C/T | 01p | C | 0.331818182 | 0.301801802 | 0.478745 |
| rs2271433  | ZSCAN2    | G/T | 15q | G | 0.174311927 | 0.149038461 | 0.478917 |
| rs441827   | NLRP4     | C/T | 19q | T | 0.328828829 | 0.361607143 | 0.478938 |
| rs935615   | ZRANB3    | A/G | 02q | A | 0.075892857 | 0.094594595 | 0.479091 |
| rs1966835  | OR1S1     | A/G | 11q | G | 0.403669725 | 0.4375      | 0.479402 |
| rs12448639 |           | C/T | 16p | C | 0.148648649 | 0.125       | 0.479416 |
| rs942077   | RBM20     | C/G | 10q | G | 0.160714286 | 0.135135135 | 0.47954  |
| rs548164   |           | C/T | 01q | C | 0.222727273 | 0.252293578 | 0.479663 |
| rs11735477 | TKTL2     | A/T | 04q | A | 0.200892857 | 0.175675676 | 0.479917 |
| rs6431631  | LOC339766 | A/C | 02q | C | 0.223214286 | 0.196428571 | 0.479979 |
| rs10512747 | CARD6     | C/T | 05p | T | 0.133928571 | 0.111607143 | 0.48013  |
| rs9614653  | SMC1B     | C/T | 22q | T | 0.112612613 | 0.133928571 | 0.480143 |
| rs2549887  |           | A/G | 16q | G | 0.247663551 | 0.216981132 | 0.480268 |
| rs10497410 | SCRN3     | C/T | 02q | T | 0.196428571 | 0.225225225 | 0.480288 |
| rs11075798 |           | C/T | 16q | T | 0.160714286 | 0.183035714 | 0.48069  |
| rs4669796  | LOC731556 | C/G | 02p | C | 0.227678571 | 0.2         | 0.480707 |
| rs269243   | DENND2A   | G/T | 07q | G | 0.072072072 | 0.054054054 | 0.480748 |
| rs209729   | ZBTB40    | C/T | 01p | T | 0.274774775 | 0.243243243 | 0.480856 |
| rs1036533  | SGOL2     | C/T | 02q | T | 0.091743119 | 0.072727273 | 0.480866 |
| rs11770052 | WBSCR28   | A/T | 07q | T | 0.247747748 | 0.276785714 | 0.480916 |
| rs10055973 |           | A/G | 05q | G | 0.25        | 0.223214286 | 0.481007 |
| rs3731781  | ARMC9     | A/G | 02q | G | 0.274774775 | 0.245535714 | 0.481067 |

|            |             |     |     |   |             |             |          |
|------------|-------------|-----|-----|---|-------------|-------------|----------|
| rs2259102  | MUC4        | C/G | 03q | C | 0.148648649 | 0.126126126 | 0.481216 |
| rs1516144  |             | G/T | 02q | G | 0.222222222 | 0.25        | 0.481319 |
| rs324146   | TCTE1       | C/T | 06p | C | 0.1875      | 0.214285714 | 0.481634 |
| rs3736518  | ECD         | C/G | 10q | G | 0.084821429 | 0.067567568 | 0.481638 |
| rs4267943  | CENPQ       | A/G | 06p | A | 0.357142857 | 0.388392857 | 0.481945 |
| rs2666472  | ANKRD38     | C/T | 01p | T | 0.285714286 | 0.254464286 | 0.482124 |
| rs2282580  | RPUSD4      | A/G | 11q | G | 0.316964286 | 0.346846847 | 0.482189 |
| rs1055130  | DCC1        | A/G | 08q | A | 0.283783784 | 0.254464286 | 0.482206 |
| rs3813895  | PLCZ1       | A/G | 12p | G | 0.200892857 | 0.178571429 | 0.482526 |
| rs1408184  | C13orf18    | A/G | 13q | A | 0.31981982  | 0.290178571 | 0.482564 |
| rs6764043  | FHIT        | C/T | 03p | T | 0.401785714 | 0.433035714 | 0.482977 |
| rs3765524  | PLCE1       | C/T | 10q | T | 0.308035714 | 0.279279279 | 0.483028 |
| rs2292954  | SPG7        | C/T | 16q | C | 0.191964286 | 0.166666667 | 0.483091 |
| rs306547   | DDX31       | C/T | 09q | T | 0.211711712 | 0.240909091 | 0.483099 |
| rs1056104  | GEMIN6      | A/G | 02p | A | 0.070093458 | 0.087962963 | 0.483155 |
| rs6493352  | MTMR15      | C/T | 15q | T | 0.160714286 | 0.1875      | 0.483204 |
| rs10407452 |             | A/G | 19p | G | 0.299107143 | 0.330357143 | 0.483289 |
| rs2271430  | SCOC        | C/G | 04q | C | 0.135135135 | 0.111607143 | 0.483403 |
| rs7125943  | IGSF22      | C/T | 11p | T | 0.263636364 | 0.233944954 | 0.483558 |
| rs2071152  | TMEM1       | A/G | 21q | A | 0.200892857 | 0.175675676 | 0.483647 |
| rs3741280  | DSCAML1     | G/T | 11q | T | 0.25        | 0.279279279 | 0.483648 |
| rs658360   |             | C/T | 07q | C | 0.373873874 | 0.40625     | 0.483668 |
| rs302453   | NLRP4       | A/T | 19q | T | 0.256756757 | 0.285714286 | 0.483878 |
| rs2051993  |             | A/G | 12q | A | 0.316964286 | 0.285714286 | 0.483898 |
| rs2876098  | CAGE1       | G/T | 06p | G | 0.174107143 | 0.148648649 | 0.483985 |
| rs667782   | PUS3, HYLS1 | C/T | 11q | C | 0.200892857 | 0.227678571 | 0.484033 |
| rs784133   | RSHL3       | C/T | 06q | T | 0.450450451 | 0.415178571 | 0.48415  |
| rs3088371  | DR1         | A/T | 01p | T | 0.080357143 | 0.0625      | 0.484406 |
| rs981684   | KRT27       | A/G | 17q | A | 0.455357143 | 0.486607143 | 0.48442  |
| rs2270941  | DHDH        | C/T | 19q | T | 0.234234234 | 0.263392857 | 0.484468 |
| rs1800566  | NQO1        | C/T | 16q | T | 0.203883495 | 0.173469388 | 0.484558 |
| rs2304497  | ACLY        | G/T | 17q | G | 0.129464286 | 0.151785714 | 0.484589 |
| rs2270989  |             | A/G | 06p | A | 0.325892857 | 0.294642857 | 0.484799 |
| rs2124147  | PLD1        | A/G | 03q | G | 0.40625     | 0.4375      | 0.484801 |
| rs37590    |             | C/G | 16q | G | 0.089285714 | 0.071428571 | 0.484845 |
| rs2272495  | APPL2       | C/T | 12q | T | 0.180555556 | 0.20754717  | 0.485049 |
| rs10951942 | LOC136288   | G/T | 07p | T | 0.46875     | 0.436936937 | 0.485333 |

|            |                   |     |     |   |             |             |          |
|------------|-------------------|-----|-----|---|-------------|-------------|----------|
| rs6034464  | C20orf23          | A/G | 20p | A | 0.357142857 | 0.388392857 | 0.485755 |
| rs2302075  | EVC               | G/T | 04p | G | 0.223214286 | 0.198198198 | 0.485779 |
| rs3826332  |                   | A/G | 17p | G | 0.1875      | 0.214285714 | 0.486414 |
| rs11578336 | MAEL              | G/T | 01q | G | 0.263392857 | 0.234234234 | 0.486424 |
| rs2811795  | C9orf86, KIAA1984 | C/T | 09q | T | 0.208333333 | 0.233944954 | 0.486506 |
| rs5751061  |                   | G/T | 22q | T | 0.40625     | 0.373873874 | 0.486665 |
| rs6511764  |                   | A/G | 19p | G | 0.134259259 | 0.110091743 | 0.486708 |
| rs10747493 | BRDT              | C/T | 01p | C | 0.111607143 | 0.133928571 | 0.48682  |
| rs4803528  |                   | A/G | 19q | G | 0.463963964 | 0.495495496 | 0.486864 |
| rs7535533  | RGSL1             | A/G | 01q | G | 0.342342342 | 0.3125      | 0.486936 |
| rs2230344  | GPR15             | C/T | 03q | T | 0.1875      | 0.165178571 | 0.4872   |
| rs863362   | OR10X1            | C/T | 01q | T | 0.450450451 | 0.482142857 | 0.487618 |
| rs2073714  | SLC22A14          | A/G | 03p | G | 0.053571429 | 0.040178571 | 0.487622 |
| rs671871   | LAMA1             | A/G | 18p | G | 0.178899083 | 0.155660377 | 0.487682 |
| rs3827147  | C20orf96          | A/T | 20p | T | 0.387387387 | 0.357142857 | 0.488406 |
| rs3763978  | TSPAN8            | C/G | 12q | G | 0.441964286 | 0.410714286 | 0.488474 |
| rs457857   | EMR1              | A/G | 19p | A | 0.236607143 | 0.263392857 | 0.488636 |
| rs2068431  |                   | C/T | 19q | T | 0.46875     | 0.5         | 0.488766 |
| rs11109969 | ANKS1B, FAM71C    | A/G | 12q | G | 0.3125      | 0.283783784 | 0.488872 |
| rs854800   | MYO15A            | C/T | 17p | T | 0.254464286 | 0.28125     | 0.488941 |
| rs1064017  | TCL1B             | A/G | 14q | A | 0.491071429 | 0.459090909 | 0.489259 |
| rs6962772  | ZNF789            | A/G | 07q | G | 0.147321429 | 0.169642857 | 0.48927  |
| rs7593557  | TRPM8             | A/G | 02q | A | 0.086021505 | 0.06741573  | 0.489278 |
| rs211449   | LYPLA2P1          | A/C | 06p | A | 0.372727273 | 0.339285714 | 0.489487 |
| rs2522833  | PCLO              | A/C | 07q | C | 0.470588235 | 0.434065934 | 0.489639 |
| rs3760955  | FUT6, C19orf30    | G/T | 19p | G | 0.346846847 | 0.379464286 | 0.489945 |
| rs4332747  | ABCA17            | A/C | 16p | C | 0.294642857 | 0.325892857 | 0.490005 |
| rs8623     | MPZL1             | C/T | 01q | T | 0.099056604 | 0.077981651 | 0.49015  |
| rs2301521  | WBP2NL            | C/G | 22q | G | 0.36036036  | 0.328828829 | 0.490183 |
| rs9369738  | GPR115            | A/C | 06p | A | 0.110091743 | 0.131818182 | 0.490312 |
| rs7155490  | TXNDC16           | C/T | 14q | T | 0.209821429 | 0.183035714 | 0.490399 |
| rs6118986  |                   | C/G | 20q | C | 0.171428571 | 0.144859813 | 0.49044  |
| rs12564487 |                   | C/G | 01q | C | 0.440366972 | 0.46875     | 0.490527 |
| rs1057077  | ENO2, LRRC23      | A/T | 12p | A | 0.308035714 | 0.279279279 | 0.490753 |
| rs34677    | AMACR             | G/T | 05p | T | 0.125       | 0.144144144 | 0.490771 |
| rs2257596  | ANKRD30A          | C/T | 21q | T | 0.477477478 | 0.446428571 | 0.490874 |
| rs2071192  | EVPL              | A/G | 17q | A | 0.328828829 | 0.361607143 | 0.491698 |

|            |                  |     |     |   |             |             |          |
|------------|------------------|-----|-----|---|-------------|-------------|----------|
| rs2230752  | ZNF177           | A/T | 19p | A | 0.448113207 | 0.415       | 0.491744 |
| rs11550034 | ZNF3             | C/T | 07q | C | 0.125       | 0.147321429 | 0.491943 |
| rs1000079  |                  | C/T | 03q | T | 0.09375     | 0.111607143 | 0.491983 |
| rs3770208  | EPHA4            | A/G | 02q | A | 0.436936937 | 0.40625     | 0.492027 |
| rs867168   | ZNF554           | C/T | 19p | C | 0.151785714 | 0.175675676 | 0.492187 |
| rs867169   | ZNF554           | C/T | 19p | T | 0.151785714 | 0.175675676 | 0.492187 |
| rs3809530  | MYO1E, LDHAL6B   | C/T | 15q | T | 0.252252252 | 0.28125     | 0.492856 |
| rs3751820  | KIAA0174, PKD1L3 | A/G | 16q | G | 0.322727273 | 0.294642857 | 0.492902 |
| rs3750671  |                  | G/T | 10p | T | 0.3125      | 0.34375     | 0.493107 |
| rs9808753  | IFNGR2           | A/G | 21q | G | 0.129464286 | 0.151785714 | 0.493424 |
| rs2249317  | SIRPD            | C/T | 20p | T | 0.138392857 | 0.160714286 | 0.493539 |
| rs12352254 | KCNV2            | C/G | 09p | G | 0.075892857 | 0.09375     | 0.493587 |
| rs3177087  |                  | A/C | 20p | A | 0.071428571 | 0.089285714 | 0.493624 |
| rs363294   | PDZD8            | C/T | 10q | T | 0.058558559 | 0.044642857 | 0.493753 |
| rs1042464  | HRG              | A/T | 03q | A | 0.480952381 | 0.485849057 | 0.494248 |
| rs2496338  | FHAD1            | C/G | 01p | G | 0.310810811 | 0.28125     | 0.494583 |
| rs2290057  | MORC1            | C/T | 03q | T | 0.196261682 | 0.223214286 | 0.494644 |
| rs3802386  |                  | G/T | 09q | T | 0.373873874 | 0.340909091 | 0.494909 |
| rs4968318  | C17orf57         | A/G | 17q | G | 0.378378378 | 0.346846847 | 0.495109 |
| rs1046098  |                  | C/T | 01q | T | 0.308035714 | 0.339285714 | 0.495212 |
| rs10195632 | ZSWIM2           | A/T | 02q | T | 0.075892857 | 0.09375     | 0.495311 |
| rs6434197  | ZSWIM2           | C/T | 02q | T | 0.075892857 | 0.09375     | 0.495311 |
| rs11678591 | TMEM131          | C/T | 02q | C | 0.345454545 | 0.375       | 0.495333 |
| rs1052276  | CCDC113, Kikbl4  | A/G | 16q | A | 0.089285714 | 0.108108108 | 0.495402 |
| rs10043986 | CMYA5            | C/T | 05q | T | 0.133928571 | 0.112612613 | 0.495852 |
| rs7140561  | CTAGE5           | C/T | 14q | T | 0.050458716 | 0.036697248 | 0.495889 |
| rs2650492  | SBK1             | A/G | 16p | A | 0.285714286 | 0.256756757 | 0.495974 |
| rs3799260  | KLHL31           | A/G | 06p | G | 0.214285714 | 0.189189189 | 0.496017 |
| rs2271900  | DEPDC6           | A/G | 08q | A | 0.285714286 | 0.256756757 | 0.496092 |
| rs9401952  |                  | A/C | 06q | A | 0.264423077 | 0.233333333 | 0.496198 |
| rs11672914 | FUT6             | A/G | 19p | A | 0.321428571 | 0.292792793 | 0.496206 |
| rs906219   | HKDC1            | G/T | 10q | T | 0.325892857 | 0.355855856 | 0.496264 |
| rs1057910  | CYP2C9           | A/C | 10q | C | 0.072072072 | 0.054545455 | 0.496483 |
| rs3746804  | C20orf54         | A/G | 20p | A | 0.184684685 | 0.209821429 | 0.496833 |
| rs10009228 | CHRNA9           | A/G | 04p | A | 0.183035714 | 0.160714286 | 0.496924 |
| rs892145   | PGLYRP2          | A/T | 19p | A | 0.342342342 | 0.375       | 0.496971 |
| rs1052704  | PXDNL            | A/C | 08q | A | 0.263392857 | 0.292792793 | 0.497013 |

|            |           |     |     |   |             |             |          |
|------------|-----------|-----|-----|---|-------------|-------------|----------|
| rs11275    |           | A/G | 07p | A | 0.191964286 | 0.216216216 | 0.49722  |
| rs2470911  | TRIM69    | A/G | 15q | G | 0.316964286 | 0.285714286 | 0.497423 |
| rs2236729  | SUHW2     | G/T | 22q | T | 0.110091743 | 0.091743119 | 0.497692 |
| rs1799899  | TF        | A/G | 03q | A | 0.053571429 | 0.04054054  | 0.497827 |
| rs9949231  |           | A/G | 18q | G | 0.22972973  | 0.202702703 | 0.497934 |
| rs10905673 | TCEB1P3   | A/G | 10p | G | 0.223214286 | 0.198198198 | 0.497951 |
| rs3811740  | PLK4      | A/T | 04q | A | 0.365740741 | 0.331730769 | 0.498149 |
| rs2741804  | OR2D2     | C/T | 11p | T | 0.415178571 | 0.383928571 | 0.498557 |
| rs9369905  | C6orf140  | A/C | 06p | A | 0.352678571 | 0.324324324 | 0.498633 |
| rs9508887  | PSPC1     | A/T | 13q | T | 0.242990654 | 0.273148148 | 0.498738 |
| rs1064213  | PLCL1     | A/G | 02q | A | 0.486363636 | 0.455357143 | 0.498939 |
| rs4915221  | LOC440706 | A/G | 01q | G | 0.436936937 | 0.405405405 | 0.498987 |
| rs1878878  | GPR98     | A/G | 05q | A | 0.359090909 | 0.328828829 | 0.499323 |
| rs9921120  | LOC646939 | A/C | 16p | A | 0.415178571 | 0.446428571 | 0.499334 |
| rs9579663  | PSPC1     | C/T | 13q | T | 0.080357143 | 0.098214286 | 0.499393 |
| rs2277257  | SLC29A3   | A/G | 10q | G | 0.480952381 | 0.449074074 | 0.499466 |
| rs9911226  | OR3A4     | A/C | 17p | A | 0.118181818 | 0.098130841 | 0.499721 |
| rs9815240  | PLSCR4    | G/T | 03q | G | 0.133928571 | 0.111607143 | 0.499725 |
| rs9686997  | FLJ40453  | C/T | 05q | C | 0.263392857 | 0.234234234 | 0.499753 |
| rs11204546 | OR2W3     | C/T | 01q | T | 0.370535714 | 0.400900901 | 0.500031 |
| rs1316300  |           | C/T | 03q | T | 0.455357143 | 0.424107143 | 0.500091 |
| rs2228220  | HIVEP1    | A/G | 06p | G | 0.067567568 | 0.084821429 | 0.500114 |
| rs14026    | FLJ31438  | A/G | 02p | A | 0.477678571 | 0.491071429 | 0.500124 |
| rs522496   | KIF17     | C/T | 01p | C | 0.330357143 | 0.299107143 | 0.500241 |
| rs2886644  | L1TD1     | C/T | 01p | T | 0.267857143 | 0.297297297 | 0.500254 |
| rs11556924 | ZC3HC1    | C/T | 07q | T | 0.357142857 | 0.388392857 | 0.500375 |
| rs2072276  | GFRA1     | A/G | 10q | G | 0.072727273 | 0.09009009  | 0.500398 |
| rs7870554  | KIAA1529  | G/T | 09q | T | 0.054054054 | 0.035714286 | 0.500506 |
| rs2124489  | OSBPL10   | C/T | 03p | T | 0.285714286 | 0.316964286 | 0.500582 |
| rs2416933  | NR5A1     | A/G | 09q | G | 0.486607143 | 0.455357143 | 0.500634 |
| rs915033   | NR5A1     | C/G | 09q | C | 0.486607143 | 0.455357143 | 0.500634 |
| rs1491242  | LOC285556 | A/G | 04q | G | 0.142857143 | 0.120535714 | 0.500704 |
| rs7196726  | ZNF646    | A/G | 16p | A | 0.369369369 | 0.4         | 0.500719 |
| rs632113   |           | C/T | 10q | C | 0.401785714 | 0.370535714 | 0.500861 |
| rs4820236  |           | A/G | 22q | G | 0.054054054 | 0.040540541 | 0.501479 |
| rs517634   | PRUNE2    | C/T | 09q | T | 0.191964286 | 0.21875     | 0.501703 |
| rs680775   | PRUNE2    | C/T | 09q | T | 0.191964286 | 0.21875     | 0.501703 |

|            |                    |     |     |   |             |             |          |
|------------|--------------------|-----|-----|---|-------------|-------------|----------|
| rs8184448  | LOC284751          | A/C | 20q | A | 0.234234234 | 0.261261261 | 0.501896 |
| rs1533594  | RTP4               | C/T | 03q | C | 0.174107143 | 0.200892857 | 0.501934 |
| rs2275866  | LAD1               | A/T | 01q | T | 0.071428571 | 0.089285714 | 0.502028 |
| rs7732671  | PPARGC1B           | C/G | 05q | C | 0.099099099 | 0.080357143 | 0.502033 |
| rs635874   |                    | A/G | 17q | A | 0.068807339 | 0.054054054 | 0.502303 |
| rs8105668  | ZNF160             | C/G | 19q | G | 0.214285714 | 0.241071429 | 0.502412 |
| rs2236005  | MYO18B             | A/G | 22q | G | 0.18018018  | 0.15625     | 0.502566 |
| rs531503   | ZAN                | A/G | 07q | G | 0.370535714 | 0.401785714 | 0.5026   |
| rs2920297  | PSCA               | C/T | 08q | C | 0.391891892 | 0.424107143 | 0.502621 |
| rs738935   | TBC1D22A, FLJ32756 | A/T | 22q | A | 0.272321429 | 0.245535714 | 0.502623 |
| rs11254408 | TRDMT1             | A/C | 10p | A | 0.129464286 | 0.15        | 0.502636 |
| rs2234002  | TAS2R4             | A/G | 07q | A | 0.491071429 | 0.477678571 | 0.502653 |
| rs2037912  | PPL                | C/G | 16p | C | 0.432432432 | 0.464285714 | 0.502815 |
| rs6788319  | UTS2D              | A/C | 03q | C | 0.435483871 | 0.465909091 | 0.502869 |
| rs2279457  |                    | A/G | 03q | G | 0.491071429 | 0.477678571 | 0.502933 |
| rs7451713  | ENPP4              | C/G | 06p | C | 0.419642857 | 0.450892857 | 0.502968 |
| rs9509307  | IFT88              | A/G | 13q | G | 0.241071429 | 0.265765766 | 0.503282 |
| rs2973275  | C4orf19            | A/G | 04p | A | 0.227678571 | 0.254464286 | 0.503364 |
| rs2903566  | OR1S1              | A/C | 11q | A | 0.405405405 | 0.436936937 | 0.503922 |
| rs388685   | ZNF45              | C/G | 19q | C | 0.472972973 | 0.441964286 | 0.504112 |
| rs8014538  |                    | C/T | 14q | T | 0.334821429 | 0.308035714 | 0.504324 |
| rs3784589  | TRPM1              | A/C | 15q | A | 0.058558559 | 0.044642857 | 0.504355 |
| rs1791     |                    | A/C | 07q | A | 0.231818182 | 0.258928571 | 0.504547 |
| rs648921   |                    | C/G | 11p | C | 0.272321429 | 0.297297297 | 0.50475  |
| rs2294758  | VNN3               | A/G | 06q | A | 0.388392857 | 0.357142857 | 0.504871 |
| rs1019670  | MS4A6A             | A/T | 11q | T | 0.385321101 | 0.355855856 | 0.504944 |
| rs8040502  | CASC5              | A/G | 15q | A | 0.148648649 | 0.171171171 | 0.505121 |
| rs1056620  |                    | A/G | 12q | G | 0.481481482 | 0.449541284 | 0.505339 |
| rs10422056 | WDR87              | C/G | 19q | G | 0.241071429 | 0.267857143 | 0.505551 |
| rs6497759  | TNRC6A             | A/G | 16p | A | 0.223214286 | 0.198198198 | 0.505578 |
| rs4519391  | DKFZp779B1634      | A/G | 18p | G | 0.375       | 0.34375     | 0.505838 |
| rs3762321  | INADL              | C/T | 01p | T | 0.084821429 | 0.102678571 | 0.505929 |
| rs8042919  | TRPM7              | A/G | 15q | A | 0.103603604 | 0.084821429 | 0.506073 |
| rs750027   |                    | C/G | 02p | G | 0.4375      | 0.40625     | 0.506086 |
| rs7330220  | LECT1              | C/T | 13q | T | 0.066964286 | 0.084821429 | 0.506116 |
| rs7857490  |                    | C/T | 09p | C | 0.410714286 | 0.379464286 | 0.506342 |
| rs187316   | ALPK3              | C/T | 15q | C | 0.294642857 | 0.321428571 | 0.506536 |



|            |                                    |     |     |   |             |             |          |
|------------|------------------------------------|-----|-----|---|-------------|-------------|----------|
| rs10164815 | ZSWIM2                             | A/G | 02q | G | 0.076576577 | 0.09375     | 0.50711  |
| rs880633   | CHI3L1                             | C/T | 01q | T | 0.477477477 | 0.490990991 | 0.507142 |
| rs1898466  | RALYL                              | C/T | 08q | T | 0.072115385 | 0.058823529 | 0.507188 |
| rs2273454  | GLOD4, RNMTL1                      | G/T | 17p | T | 0.213636364 | 0.1875      | 0.507304 |
| rs7859598  |                                    | C/T | 09p | C | 0.401785714 | 0.433035714 | 0.50743  |
| rs1865102  | LOC649137                          | A/C | 19q | C | 0.357142857 | 0.388392857 | 0.507578 |
| rs574004   |                                    | A/G | 19q | G | 0.340909091 | 0.369369369 | 0.507696 |
| rs1147083  | FLJ41278                           | A/T | 12q | A | 0.31        | 0.338541667 | 0.507991 |
| rs2332285  | DTX3L                              | A/G | 03q | G | 0.405405405 | 0.4375      | 0.508242 |
| rs3746619  | MC3R                               | A/C | 20q | A | 0.075892857 | 0.09375     | 0.508459 |
| rs2073498  | RASSF1                             | A/C | 03p | A | 0.079439252 | 0.063063063 | 0.508502 |
| rs1943639  |                                    | A/G | 11q | A | 0.441964286 | 0.473214286 | 0.508566 |
| rs9262152  | MDC1                               | C/T | 06p | T | 0.133928571 | 0.15625     | 0.508644 |
| rs1567759  | KRT77                              | G/T | 12q | T | 0.392857143 | 0.361111111 | 0.508674 |
| rs11640912 | ADAMTS18                           | A/T | 16q | T | 0.392857143 | 0.366071429 | 0.508785 |
| rs7026705  | OR13C8                             | A/C | 09q | A | 0.423423423 | 0.453271028 | 0.508811 |
| rs9471966  | PTCRA                              | A/G | 06p | A | 0.241071429 | 0.267857143 | 0.508848 |
| rs2298075  | SEC31B                             | G/T | 10q | T | 0.207207207 | 0.232142857 | 0.508928 |
| rs177484   |                                    | A/C | 07p | A | 0.495535714 | 0.464285714 | 0.508986 |
| rs2075960  | C20orf119                          | G/T | 20q | G | 0.288288288 | 0.259259259 | 0.509317 |
| rs723077   | TTC12                              | A/C | 11q | C | 0.486238532 | 0.454954955 | 0.509408 |
| rs10426455 |                                    | A/G | 19p | G | 0.142857143 | 0.120535714 | 0.50946  |
| rs10749138 | NRAP                               | C/T | 10q | C | 0.473214286 | 0.441964286 | 0.50951  |
| rs2230808  | ABCA1                              | A/G | 09q | A | 0.272727273 | 0.245535714 | 0.509625 |
| rs6987308  | ZNF707                             | A/C | 08q | C | 0.126126126 | 0.147321429 | 0.509876 |
| rs1052637  | DDX18                              | C/G | 02q | C | 0.325892857 | 0.357142857 | 0.510041 |
| rs4910756  | OR51B6                             | A/G | 11p | G | 0.231818182 | 0.204545455 | 0.510163 |
| rs848019   | FLJ14712, LOC730608                | C/T | 07p | T | 0.083333333 | 0.100917431 | 0.510801 |
| rs12669721 | LOC136242                          | G/T | 07q | G | 0.495495495 | 0.463963964 | 0.511158 |
| rs3117328  | LOC642024, LOC646317,<br>LOC651503 | G/T | 06p | T | 0.473214286 | 0.495535714 | 0.511251 |
| rs2292161  |                                    | A/G | 04q | A | 0.283783784 | 0.254545454 | 0.511288 |
| rs2104978  | TEP1                               | A/G | 14q | G | 0.063063063 | 0.049107143 | 0.511358 |
| rs362331   | HD                                 | C/T | 04p | T | 0.473214286 | 0.495535714 | 0.511616 |
| rs11108643 | C12orf63                           | C/T | 12q | T | 0.267857143 | 0.294642857 | 0.512358 |
| rs9993896  |                                    | A/T | 04q | T | 0.144144144 | 0.125       | 0.512884 |
| rs2294008  | PSCA                               | C/T | 08q | T | 0.392857143 | 0.424107143 | 0.513426 |

|            |                      |     |     |   |             |             |          |
|------------|----------------------|-----|-----|---|-------------|-------------|----------|
| rs7527180  | LCE1D, LCE1E         | A/G | 01q | G | 0.494845361 | 0.479381443 | 0.513478 |
| rs1010294  | FHAD1                | C/T | 01p | C | 0.299065421 | 0.270642202 | 0.513756 |
| rs10953303 | ZAN                  | G/T | 07q | T | 0.241071429 | 0.27027027  | 0.514299 |
| rs1425917  | PIH1D2               | A/G | 11q | A | 0.081081081 | 0.098214286 | 0.514611 |
| rs3739435  | NUDT18               | C/T | 08p | C | 0.398148148 | 0.427927928 | 0.514656 |
| rs4130091  | LOC644357, LOC730715 | A/G | 01p | A | 0.0625      | 0.075892857 | 0.514912 |
| rs2073447  |                      | C/G | 22q | G | 0.339285714 | 0.370535714 | 0.514934 |
| rs2271233  | TEKT1                | C/T | 17p | T | 0.107142857 | 0.089285714 | 0.514973 |
| rs3800325  | PGBD1                | C/G | 06p | G | 0.129464286 | 0.152777778 | 0.51514  |
| rs423333   | RGNEF                | C/T | 05q | T | 0.154545455 | 0.178571429 | 0.515228 |
| rs3747742  | TREML2               | C/T | 06p | C | 0.330357143 | 0.3         | 0.515269 |
| rs288334   | DNAJC10              | A/C | 02q | A | 0.375       | 0.348214286 | 0.515474 |
| rs1607017  | SCAPER               | A/C | 15q | A | 0.333333333 | 0.303571429 | 0.5155   |
| rs11085147 | FUT6, LONP1          | A/G | 19p | A | 0.094594595 | 0.076576577 | 0.515648 |
| rs2731038  | DBX2                 | A/G | 12q | A | 0.401785714 | 0.433035714 | 0.515739 |
| rs3825629  | KIAA0423             | C/G | 14q | G | 0.094339623 | 0.077272727 | 0.515806 |
| rs12405278 | FLG                  | A/G | 01q | A | 0.166666667 | 0.145454545 | 0.515853 |
| rs10414485 | LOC162993            | C/T | 19p | T | 0.181818182 | 0.206422018 | 0.515876 |
| rs2289084  | hCG_1795065          | C/T | 02p | C | 0.116071429 | 0.098214286 | 0.516001 |
| rs10776821 |                      | A/G | 09q | A | 0.477678571 | 0.446428571 | 0.516156 |
| rs814501   | SPTBN4               | A/G | 19q | G | 0.5         | 0.468468469 | 0.516238 |
| rs10455    | CYBRD1               | A/G | 02q | G | 0.35        | 0.386138614 | 0.516405 |
| rs8037195  |                      | A/G | 15q | G | 0.491071429 | 0.477477478 | 0.516436 |
| rs2288709  | DYNC2LI1             | A/G | 02p | G | 0.330357143 | 0.36036036  | 0.516448 |
| rs6477533  |                      | A/G | 09q | G | 0.40990991  | 0.377272727 | 0.516565 |
| rs12520799 | C5orf20              | A/T | 05q | A | 0.4375      | 0.467889908 | 0.516641 |
| rs683866   | PRUNE2               | A/C | 09q | C | 0.352678571 | 0.383928571 | 0.516674 |
| rs12449409 |                      | A/G | 17q | A | 0.424107143 | 0.392857143 | 0.516809 |
| rs729895   | ADARB1               | A/G | 21q | A | 0.15625     | 0.135135135 | 0.516959 |
| rs9890664  | OTOP3                | A/G | 17q | G | 0.308035714 | 0.333333333 | 0.517003 |
| rs1299818  |                      | C/G | 01p | C | 0.198198198 | 0.175675676 | 0.51716  |
| rs9264630  |                      | G/T | 06p | G | 0.270642202 | 0.25        | 0.517241 |
| rs1505192  | OR51E2               | C/T | 11p | C | 0.133928571 | 0.157657658 | 0.517247 |
| rs25640    | HSD17B4              | A/G | 05q | A | 0.446428571 | 0.477678571 | 0.517279 |
| rs2298553  | MS4A12               | C/T | 11q | T | 0.495535714 | 0.473214286 | 0.517328 |
| rs2256721  | CHIA                 | G/T | 01p | T | 0.355855856 | 0.327272727 | 0.517623 |
| rs7975356  | OVCH1                | A/G | 12p | G | 0.142857143 | 0.165178571 | 0.517757 |

|            |                                 |     |     |   |             |             |          |
|------------|---------------------------------|-----|-----|---|-------------|-------------|----------|
| rs7603997  | ITSN2                           | C/T | 02p | T | 0.338235294 | 0.369565217 | 0.51807  |
| rs3733251  |                                 | G/T | 04q | G | 0.165178571 | 0.142857143 | 0.518297 |
| rs2074936  | POU6F2                          | A/G | 07p | A | 0.119266055 | 0.13963964  | 0.518323 |
| rs2942194  | SLC25A37                        | C/T | 08p | C | 0.297169811 | 0.268518518 | 0.51851  |
| rs1053808  | TTC3                            | C/T | 21q | T | 0.477477477 | 0.490825688 | 0.518693 |
| rs6988393  |                                 | A/G | 08q | G | 0.381818182 | 0.410714286 | 0.518715 |
| rs3752261  |                                 | A/G | 20q | G | 0.202702703 | 0.178571429 | 0.518843 |
| rs4678     | VARs2                           | C/T | 06p | T | 0.202702703 | 0.178571429 | 0.518968 |
|            | LOC642051, NOL5BP,<br>LOC651388 |     |     |   |             |             |          |
| rs1233627  |                                 | C/T | 06p | C | 0.481308411 | 0.485294118 | 0.519118 |
| rs9375503  |                                 | C/T | 06q | T | 0.263392857 | 0.236607143 | 0.51956  |
| rs1048945  | APEX1, TMEM55B                  | C/G | 14q | C | 0.053571429 | 0.04054054  | 0.519986 |
| rs6790837  | HEG1                            | A/G | 03q | A | 0.419642857 | 0.45        | 0.52     |
| rs1135196  | SIRPB1                          | C/T | 20p | C | 0.482758621 | 0.483695652 | 0.52016  |
| rs2492654  |                                 | C/T | 10q | T | 0.111607143 | 0.129464286 | 0.520628 |
| rs2274224  | PLCE1                           | C/G | 10q | C | 0.477678571 | 0.446428571 | 0.521074 |
| rs4768261  | MUC19                           | C/T | 12q | T | 0.151785714 | 0.129464286 | 0.521109 |
| rs7166483  | VSIG6                           | A/T | 15q | A | 0.316964286 | 0.339285714 | 0.521233 |
| rs9579717  | ZMYM5                           | A/C | 13q | A | 0.075471698 | 0.093137255 | 0.521519 |
| rs7996972  | FLJ44054                        | C/T | 13q | C | 0.328828829 | 0.357142857 | 0.521757 |
| rs547483   | ZNF568                          | C/T | 19q | C | 0.294642857 | 0.321428571 | 0.521937 |
| rs3208406  | EXOSC3                          | A/G | 09p | G | 0.111607143 | 0.09375     | 0.522019 |
| rs7023954  | MTAP                            | A/G | 09p | A | 0.418918919 | 0.390909091 | 0.522147 |
| rs3785520  | TBCD                            | C/T | 17q | T | 0.22972973  | 0.254464286 | 0.522342 |
| rs1986751  | DKFZp779B1634                   | G/T | 18p | G | 0.38317757  | 0.351851852 | 0.522348 |
| rs9965081  | C18orf34                        | A/T | 18q | A | 0.053571429 | 0.066964286 | 0.522481 |
| rs3816208  | SDC2                            | C/T | 08q | T | 0.053571429 | 0.040540541 | 0.522547 |
| rs4416742  | FBXL18                          | A/G | 07p | A | 0.086363636 | 0.103603604 | 0.522763 |
| rs1054480  | ADAMTS2                         | C/T | 05q | T | 0.339285714 | 0.308035714 | 0.523218 |
| rs10817033 | SVEP1                           | G/T | 09q | G | 0.15625     | 0.133928571 | 0.523549 |
| rs3861513  | OR4K15                          | A/C | 14q | C | 0.25        | 0.276785714 | 0.523608 |
| rs896560   | NALCN                           | C/T | 13q | T | 0.339285714 | 0.366071429 | 0.523922 |
| rs2407146  | LOC729159                       | A/T | 16q | T | 0.401785714 | 0.432432432 | 0.524082 |
| rs1133607  | ACSM2A                          | C/T | 16p | T | 0.098214286 | 0.116071429 | 0.524092 |
| rs542998   | RTN3                            | C/T | 11q | T | 0.21875     | 0.193693694 | 0.524191 |
| rs3758581  | CYP2C19                         | A/G | 10q | A | 0.076576577 | 0.059090909 | 0.524409 |
| rs10409555 | NLRP5                           | A/G | 19q | A | 0.243243243 | 0.272727273 | 0.524454 |

|            |                      |     |     |   |             |             |          |
|------------|----------------------|-----|-----|---|-------------|-------------|----------|
| rs11872999 |                      | C/G | 18q | C | 0.085585586 | 0.103603604 | 0.524653 |
| rs2245220  | PRND                 | C/T | 20p | T | 0.467592593 | 0.5         | 0.524799 |
| rs1133378  | C19orf45             | C/T | 19p | T | 0.301980198 | 0.272277228 | 0.524868 |
| rs2644012  |                      | C/T | 08q | T | 0.214285714 | 0.189189189 | 0.524898 |
| rs42663    | GTPBP10              | G/T | 07q | T | 0.205357143 | 0.232142857 | 0.525177 |
| rs2893848  | BTN2A3               | A/G | 06p | G | 0.175675676 | 0.198198198 | 0.525658 |
| rs6766334  |                      | C/T | 03p | C | 0.410714286 | 0.380733945 | 0.525693 |
| rs1523678  | OR13C5               | A/G | 09q | G | 0.1875      | 0.209821429 | 0.525921 |
| rs4117966  | OR13C5               | A/G | 09q | A | 0.1875      | 0.209821429 | 0.525921 |
| rs1800453  |                      | A/G | 06p | G | 0.142857143 | 0.165178571 | 0.526172 |
| rs9934272  | PKD1L2               | C/G | 16q | G | 0.336363636 | 0.308035714 | 0.526177 |
| rs2774962  | KIAA1549             | C/T | 07q | C | 0.422727273 | 0.391891892 | 0.526208 |
| rs2758629  |                      | C/T | 01q | C | 0.427272727 | 0.459821429 | 0.526263 |
| rs12620556 | LOC130940            | C/T | 02q | C | 0.085585586 | 0.068807339 | 0.526296 |
| rs389389   | TEX14                | A/G | 17q | G | 0.257142857 | 0.28        | 0.526429 |
| rs3742318  | RP11-298P3.3         | C/T | 13q | C | 0.15625     | 0.18018018  | 0.526532 |
| rs3806995  | ENPP5                | A/C | 06p | C | 0.423423423 | 0.452830189 | 0.526549 |
| rs6499548  | CHD9                 | G/T | 16q | T | 0.205357143 | 0.183035714 | 0.526711 |
| rs7259845  |                      | A/G | 19p | G | 0.142857143 | 0.121621622 | 0.526783 |
| rs3998860  | CXXC6                | C/T | 10q | T | 0.153153153 | 0.175675676 | 0.527483 |
| rs1126671  | ADH4                 | A/G | 04q | A | 0.285714286 | 0.3125      | 0.527578 |
| rs1126673  | ADH4                 | A/G | 04q | G | 0.285714286 | 0.3125      | 0.527578 |
| rs2072147  | BZRAP1               | A/G | 17q | A | 0.058035714 | 0.045045045 | 0.527686 |
| rs11666024 |                      | C/T | 19q | C | 0.428571429 | 0.397321429 | 0.527815 |
| rs6945306  | STK31                | C/G | 07p | C | 0.308035714 | 0.28125     | 0.52784  |
| rs1177699  | LOC387723, LOC651940 | A/G | 10q | A | 0.285714286 | 0.3125      | 0.528029 |
| rs11036212 | OR51V1               | A/G | 11p | G | 0.142857143 | 0.165178571 | 0.528198 |
| rs1627354  | LAMB4                | A/G | 07q | A | 0.066964286 | 0.053571429 | 0.528293 |
| rs2187016  | MGC39715             | C/G | 08q | C | 0.245535714 | 0.223214286 | 0.528455 |
| rs3740918  | KIRREL3              | A/G | 11q | A | 0.279279279 | 0.252252252 | 0.528774 |
| rs2214301  |                      | A/G | 19p | G | 0.419642857 | 0.450892857 | 0.528913 |
| rs1276286  | MMP27                | A/T | 11q | T | 0.482142857 | 0.450892857 | 0.528985 |
| rs8104361  | CYP4F11              | A/G | 19p | A | 0.216216216 | 0.191964286 | 0.529031 |
| rs3100139  | TRIM69               | C/T | 15q | C | 0.129464286 | 0.151785714 | 0.52921  |
| rs2235233  | POM121L2             | A/G | 06p | G | 0.22972973  | 0.202830189 | 0.529333 |
| rs1801222  | CUBN                 | C/T | 10p | T | 0.365       | 0.392857143 | 0.529403 |
| rs669694   | TRAF3IP3             | C/G | 01q | C | 0.183035714 | 0.209090909 | 0.529628 |

|            |                      |     |     |   |             |             |          |
|------------|----------------------|-----|-----|---|-------------|-------------|----------|
| rs3812265  | CNOT4                | C/T | 07q | T | 0.214285714 | 0.191964286 | 0.529722 |
| rs8451     | LINS1                | G/T | 15q | T | 0.495412844 | 0.472972973 | 0.529767 |
| rs2273566  | SMAP1                | C/T | 06q | T | 0.072072072 | 0.089285714 | 0.530156 |
| rs1344156  | LOC441120, LOC729569 | A/C | 05q | A | 0.205357143 | 0.183035714 | 0.530345 |
| rs2032567  | LAMA4                | C/T | 06q | C | 0.299107143 | 0.272321429 | 0.530446 |
| rs2723192  | IL1F7                | A/G | 02q | A | 0.102678571 | 0.084821429 | 0.530608 |
| rs2723187  | IL1F7                | C/T | 02q | T | 0.102678571 | 0.084821429 | 0.530608 |
| rs10471371 | ITGA2                | A/G | 05q | A | 0.084821429 | 0.102678571 | 0.530621 |
| rs2276199  | PSTPIP2              | A/G | 18q | G | 0.129464286 | 0.111607143 | 0.530649 |
| rs6461378  | UNC84A, FLJ44124     | C/T | 07p | T | 0.424107143 | 0.392857143 | 0.530802 |
| rs1811     | ZNF30                | A/G | 19q | G | 0.495495496 | 0.464285714 | 0.530888 |
| rs2302685  | LRP6, BCL2L14        | C/T | 12p | C | 0.227272727 | 0.198979592 | 0.531078 |
| rs11084897 |                      | C/G | 19p | G | 0.223214286 | 0.198198198 | 0.531386 |
| rs3924999  | NRG1                 | C/T | 08p | T | 0.391891892 | 0.361607143 | 0.53154  |
| rs2853444  | LOC646960            | C/T | 02q | T | 0.162162162 | 0.183035714 | 0.531543 |
| rs2280718  | FLJ40298             | C/T | 02p | C | 0.240196078 | 0.268041237 | 0.53155  |
| rs3815087  | PSORS1C1             | C/T | 06p | T | 0.205357143 | 0.232142857 | 0.531586 |
| rs867228   | FPR1                 | A/C | 19q | A | 0.1875      | 0.211711712 | 0.531704 |
| rs4955419  | CCDC71               | A/T | 03p | T | 0.357142857 | 0.328828829 | 0.532142 |
| rs3731646  | SH3BP4               | A/G | 02q | A | 0.112612613 | 0.133928571 | 0.532205 |
| rs10489823 |                      | A/C | 01q | A | 0.076576577 | 0.0625      | 0.532214 |
| rs1805073  | DMGDH                | C/G | 05q | G | 0.34375     | 0.316964286 | 0.53239  |
| rs1805074  | DMGDH                | C/T | 05q | C | 0.34375     | 0.316964286 | 0.53239  |
| rs12156247 | C8orf79              | C/G | 08p | C | 0.270642202 | 0.24537037  | 0.532744 |
| rs10948072 | ZNF318               | A/G | 06p | A | 0.093137255 | 0.110576923 | 0.532784 |
| rs6505780  | CEP192               | C/T | 18p | C | 0.321428571 | 0.348214286 | 0.53304  |
| rs1456235  | SPTBN5               | C/T | 15q | T | 0.45945946  | 0.428571429 | 0.533197 |
| rs757259   | TRIM40               | C/T | 06p | T | 0.226851852 | 0.252252252 | 0.534017 |
| rs2509010  | MMP27                | C/T | 11q | T | 0.3125      | 0.285714286 | 0.534146 |
| rs233223   | MEP1B                | A/G | 18q | A | 0.308035714 | 0.333333333 | 0.534243 |
| rs2647574  | OR51Q1               | A/G | 11p | A | 0.399082569 | 0.427184466 | 0.534432 |
| rs298104   | KRT75                | A/C | 12q | A | 0.315315315 | 0.342342342 | 0.53467  |
| rs9810320  | VN2R1P               | A/G | 03q | A | 0.387387387 | 0.36036036  | 0.534888 |
| rs6685323  | AQP10, LOC729598     | C/T | 01q | T | 0.290178571 | 0.316964286 | 0.534929 |
| rs6668968  | AQP10                | A/G | 01q | A | 0.290178571 | 0.316964286 | 0.534929 |
| rs7745238  | BTN2A3               | A/G | 06p | A | 0.175675676 | 0.198198198 | 0.53498  |
| rs1455555  | SERPIN5              | C/T | 18q | C | 0.485294118 | 0.484848485 | 0.53499  |

|            |                 |     |     |   |             |             |          |
|------------|-----------------|-----|-----|---|-------------|-------------|----------|
| rs4103004  | C3orf48         | C/T | 03p | T | 0.4375      | 0.464285714 | 0.53499  |
| rs2071554  | HLA-DOB         | A/G | 06p | A | 0.058035714 | 0.044642857 | 0.53501  |
| rs2278868  | SKAP1           | C/T | 17q | C | 0.419642857 | 0.392857143 | 0.535588 |
| rs597570   | FEZ1            | A/T | 11q | A | 0.200892857 | 0.178571429 | 0.535618 |
| rs4752183  |                 | G/T | 10q | T | 0.440909091 | 0.409090909 | 0.535718 |
| rs2232618  | LBP             | C/T | 20q | C | 0.116071429 | 0.098214286 | 0.535763 |
| rs2160502  | C12orf55        | A/T | 12q | T | 0.056818182 | 0.076086957 | 0.535795 |
| rs7776009  |                 | C/T | 06p | C | 0.348214286 | 0.321428571 | 0.535801 |
| rs735943   | EXO1            | C/T | 01q | T | 0.441441441 | 0.46875     | 0.536044 |
| rs7827446  | PXDNL           | C/T | 08q | T | 0.263392857 | 0.290178571 | 0.536079 |
| rs3749767  |                 | C/T | 05q | T | 0.191964286 | 0.216216216 | 0.536243 |
| rs2298668  | PRCP            | A/C | 11q | C | 0.205357143 | 0.227678571 | 0.536411 |
| rs3753793  | CYR61           | G/T | 01p | G | 0.263636364 | 0.23853211  | 0.53675  |
| rs6435927  | MREG            | A/C | 02q | A | 0.245535714 | 0.272321429 | 0.537093 |
| rs12420823 | FLI1            | C/T | 11q | T | 0.392857143 | 0.423423423 | 0.537335 |
| rs7565527  |                 | A/C | 02q | C | 0.129464286 | 0.111607143 | 0.537348 |
| rs380126   |                 | A/G | 11q | A | 0.135135135 | 0.113636364 | 0.537389 |
| rs13428    | PARP4           | C/G | 13q | C | 0.34375     | 0.369369369 | 0.537554 |
| rs2274268  | BAG5, C14orf153 | C/G | 14q | C | 0.336363636 | 0.366071429 | 0.537609 |
| rs530978   | PRUNE2          | A/G | 09q | G | 0.369369369 | 0.399082569 | 0.537812 |
| rs2272094  | CRTAM           | A/G | 11q | A | 0.205357143 | 0.227678571 | 0.537855 |
| rs2270424  | KIAA0317        | A/G | 14q | A | 0.165178571 | 0.1875      | 0.537885 |
| rs1633399  | CLTCL1          | A/G | 22q | G | 0.058558559 | 0.072727273 | 0.537921 |
| rs2252171  |                 | C/T | 19p | T | 0.123853211 | 0.144859813 | 0.537964 |
| rs2288846  | RFX2            | A/G | 19p | A | 0.267857143 | 0.292792793 | 0.53818  |
| rs10745623 | EEA1            | G/T | 12q | T | 0.366071429 | 0.392857143 | 0.53831  |
| rs9813391  | ARGFX           | A/G | 03q | A | 0.279279279 | 0.252252252 | 0.538487 |
| rs11079346 | BZRAP1          | C/T | 17q | C | 0.35046729  | 0.321100917 | 0.53852  |
| rs6862252  | ZNF608          | G/T | 05q | T | 0.461538462 | 0.435       | 0.538833 |
| rs715146   | DCP1B           | C/T | 12p | T | 0.059633028 | 0.04587156  | 0.538846 |
| rs2582513  | AHNAK2          | C/T | 14q | T | 0.334821429 | 0.315315315 | 0.539164 |
| rs2072355  | AKAP3           | A/G | 12p | G | 0.160714286 | 0.183035714 | 0.539198 |
| rs7978555  |                 | A/G | 12q | A | 0.345454545 | 0.372727273 | 0.539349 |
| rs2282135  | HS6ST3          | C/T | 13q | T | 0.266990291 | 0.234042553 | 0.539397 |
| rs12489663 | LOC729280       | A/G | 03p | G | 0.162037037 | 0.181818182 | 0.539569 |
| rs7094285  |                 | C/G | 10p | C | 0.378378378 | 0.406542056 | 0.539884 |
| rs843358   | EIF2B5          | C/T | 03q | C | 0.261261261 | 0.285714286 | 0.540017 |

|            |          |     |     |   |             |             |          |
|------------|----------|-----|-----|---|-------------|-------------|----------|
| rs3731625  | ITSN2    | C/T | 02p | C | 0.081081081 | 0.098214286 | 0.540039 |
| rs7117365  |          | A/G | 11q | A | 0.196428571 | 0.21875     | 0.540213 |
| rs2056844  | BRWD1    | C/G | 21q | C | 0.450892857 | 0.477678571 | 0.540373 |
| rs12629299 |          | A/C | 03q | A | 0.339285714 | 0.366071429 | 0.540579 |
| rs6565904  | FLJ44881 | C/T | 18q | T | 0.175675676 | 0.200892857 | 0.540627 |
| rs2445121  |          | C/G | 11q | G | 0.179611651 | 0.206730769 | 0.540742 |
| rs3746638  | SIGLEC1  | A/G | 20p | A | 0.477678571 | 0.495535714 | 0.540745 |
| rs3750300  | PADI3    | A/G | 01p | G | 0.09375     | 0.076576577 | 0.540747 |
| rs3735035  | PODXL    | C/T | 07q | T | 0.491071429 | 0.477678571 | 0.541042 |
| rs10821668 | ANK3     | C/T | 10q | C | 0.274774775 | 0.301801802 | 0.541111 |
| rs6806773  |          | A/G | 03q | A | 0.191964286 | 0.216216216 | 0.54115  |
| rs2287939  | AMACR    | C/T | 05p | T | 0.327102804 | 0.297169811 | 0.54137  |
| rs10229731 | MUC17    | A/C | 07q | C | 0.126126126 | 0.107142857 | 0.541597 |
| rs2252074  |          | G/T | 07q | G | 0.445945946 | 0.418918919 | 0.541627 |
| rs1886996  | MPHOSPH1 | C/T | 10q | T | 0.315315315 | 0.342592593 | 0.541802 |
| rs6314     | HTR2A    | C/T | 13q | T | 0.120535714 | 0.102678571 | 0.542002 |
| rs6461515  | ABCB5    | A/G | 07p | G | 0.215686275 | 0.239583333 | 0.542179 |
| rs11043265 | WDR66    | C/T | 12q | T | 0.0625      | 0.049107143 | 0.542297 |
| rs2293979  | LRRC6    | A/G | 08q | A | 0.441441441 | 0.415178571 | 0.542304 |
| rs589623   | DYNC2H1  | C/T | 11q | C | 0.189189189 | 0.214285714 | 0.54235  |
| rs2075756  | TRIP6    | A/G | 07q | A | 0.245454545 | 0.27027027  | 0.542519 |
| rs214950   | SYNE1    | A/G | 06q | A | 0.25        | 0.225225225 | 0.542965 |
| rs1382938  | C17orf54 | C/G | 17q | G | 0.058035714 | 0.072727273 | 0.54305  |
| rs11185471 |          | C/T | 03q | C | 0.094594595 | 0.111607143 | 0.543093 |
| rs3747102  | LOC51233 | C/T | 22q | C | 0.264150943 | 0.240384615 | 0.543142 |
| rs10018786 | POLN     | G/T | 04p | G | 0.098214286 | 0.117117117 | 0.543203 |
| rs198845   | HIST1H1T | G/T | 06p | T | 0.410714286 | 0.383928571 | 0.543292 |
| rs489172   | ZP1      | A/G | 11q | G | 0.214285714 | 0.191964286 | 0.543367 |
| rs4925663  | OR2B11   | C/T | 01q | T | 0.382882883 | 0.410714286 | 0.543515 |
| rs4761808  |          | C/T | 12q | C | 0.209821429 | 0.1875      | 0.543567 |
| rs11648783 | OR2C1    | A/G | 16p | A | 0.254464286 | 0.276785714 | 0.54393  |
| rs11764583 |          | A/G | 07p | G | 0.401785714 | 0.433035714 | 0.543973 |
| rs6088066  | BPIL1    | A/T | 20q | T | 0.232142857 | 0.209821429 | 0.544092 |
| rs1898883  | DISP2    | C/G | 15q | G | 0.342342342 | 0.370535714 | 0.544132 |
| rs1448852  |          | A/G | 02q | A | 0.316964286 | 0.290178571 | 0.544337 |
| rs7959052  | KRT4     | C/T | 12q | C | 0.178571429 | 0.200892857 | 0.544488 |
| rs6512577  | ZNFX1    | C/T | 20q | T | 0.207207207 | 0.184684685 | 0.545249 |

|            |                  |     |     |   |             |             |          |
|------------|------------------|-----|-----|---|-------------|-------------|----------|
| rs7913176  | NHLRC2           | A/G | 10q | A | 0.286363636 | 0.26146789  | 0.545426 |
| rs765746   | ZNF30            | C/T | 19q | C | 0.178571429 | 0.15625     | 0.545763 |
| rs209165   |                  | G/T | 06p | G | 0.334821429 | 0.308035714 | 0.546029 |
| rs2269429  | TNXB             | A/G | 06p | A | 0.09375     | 0.111607143 | 0.546132 |
| rs1476995  | FOXN3            | C/T | 14q | T | 0.0625      | 0.075892857 | 0.546273 |
| rs10131813 | HOMEZ            | C/T | 14q | T | 0.389908257 | 0.36036036  | 0.546346 |
| rs4144691  | ADAMTSL3         | C/G | 15q | G | 0.177272727 | 0.154545455 | 0.54636  |
| rs2026196  | KIAA1958         | C/T | 09q | C | 0.058035714 | 0.044642857 | 0.546384 |
| rs4916684  | GPR98            | A/G | 05q | G | 0.368181818 | 0.339285714 | 0.546424 |
| rs11187583 | C10orf4          | A/G | 10q | A | 0.122727273 | 0.103603604 | 0.546472 |
| rs2857663  | KRT83, LOC652010 | C/T | 12q | T | 0.111607143 | 0.094594595 | 0.546622 |
| rs4313632  | LOC283440        | A/G | 12p | A | 0.21875     | 0.196428571 | 0.547238 |
| rs26764    | ERN2             | C/G | 16p | G | 0.261261261 | 0.236607143 | 0.547378 |
| rs11718329 | ZNF589           | C/G | 03p | G | 0.352678571 | 0.328828829 | 0.54768  |
| rs252283   |                  | A/C | 16p | A | 0.166666667 | 0.144144144 | 0.547885 |
| rs10791910 |                  | C/T | 11q | T | 0.058035714 | 0.072072072 | 0.548121 |
| rs1840178  | OR56A3           | A/G | 11p | A | 0.454545454 | 0.481981982 | 0.548188 |
| rs7756880  |                  | A/T | 06q | A | 0.27027027  | 0.245454545 | 0.548279 |
| rs3770657  | ETAA1            | C/T | 02p | C | 0.280952381 | 0.305       | 0.548499 |
| rs2274976  | MTHFR, C1orf167  | A/G | 01p | A | 0.066964286 | 0.053571429 | 0.548538 |
| rs3735782  |                  | A/C | 08p | A | 0.464285714 | 0.495495495 | 0.548651 |
| rs1042031  | APOB             | A/G | 02p | A | 0.153153153 | 0.174107143 | 0.548673 |
| rs583442   |                  | C/T | 05p | C | 0.220430107 | 0.242857143 | 0.548756 |
| rs848642   | FEZ2             | C/T | 02p | T | 0.348214286 | 0.321428571 | 0.548848 |
| rs2618961  |                  | A/T | 04p | A | 0.153153153 | 0.174311927 | 0.548969 |
| rs230898   | TEKT3            | C/G | 17p | C | 0.45045045  | 0.422727273 | 0.549332 |
| rs10888267 | OR2W3            | C/T | 01q | C | 0.465686274 | 0.495098039 | 0.549529 |
| rs1500481  | LOC339766        | C/T | 02q | T | 0.436936937 | 0.464285714 | 0.54974  |
| rs3754112  | IGSF2            | C/T | 01p | C | 0.303571429 | 0.330357143 | 0.549767 |
| rs2274741  | ANKRD26          | A/T | 10p | T | 0.157657658 | 0.178571429 | 0.550026 |
| rs3815923  | LOC730926        | A/G | 05q | A | 0.446428571 | 0.415178571 | 0.550026 |
| rs2296172  | MACF1            | A/G | 01p | G | 0.2         | 0.223958333 | 0.5503   |
| rs2484678  |                  | A/G | 01p | G | 0.477678571 | 0.491071429 | 0.550319 |
| rs4951291  | C1orf157         | C/T | 01q | T | 0.126126126 | 0.147321429 | 0.55034  |
| rs12523297 |                  | A/T | 05q | A | 0.190909091 | 0.174107143 | 0.550394 |
| rs1554005  | ACOXL            | C/T | 02q | T | 0.159090909 | 0.18018018  | 0.55041  |
| rs7160583  | C14orf166B       | C/T | 14q | C | 0.34375     | 0.316964286 | 0.550464 |



|            |                  |     |     |   |             |             |          |
|------------|------------------|-----|-----|---|-------------|-------------|----------|
| rs2010499  | APOL2            | A/T | 22q | A | 0.357142857 | 0.330357143 | 0.551165 |
| rs2066703  | ATP10A           | C/T | 15q | T | 0.09009009  | 0.075892857 | 0.55127  |
| rs1729674  | LOC339804        | A/C | 02p | C | 0.486111111 | 0.457943925 | 0.551481 |
| rs15922    | TAF11, C6orf107  | C/G | 06p | G | 0.054054054 | 0.040178571 | 0.551493 |
| rs1713674  |                  | C/T | 11q | C | 0.116071429 | 0.099099099 | 0.551561 |
| rs13571    | MRPL37           | C/G | 01p | C | 0.254464286 | 0.22972973  | 0.551589 |
| rs6080719  | BFSP1            | C/T | 20p | T | 0.279279279 | 0.254545455 | 0.55186  |
| rs3746471  | RP5-1054A22.3    | A/G | 20q | A | 0.46875     | 0.441964286 | 0.55219  |
| rs2941256  | RRN3             | A/G | 16p | G | 0.102678571 | 0.085585586 | 0.552379 |
| rs10415965 |                  | A/G | 19p | A | 0.297297297 | 0.324324324 | 0.552451 |
| rs2298428  | LOC150223        | C/T | 22q | T | 0.18018018  | 0.200892857 | 0.552549 |
| rs11170183 | KRT72            | A/C | 12q | A | 0.254464286 | 0.234234234 | 0.552589 |
| rs472177   | OR10V1           | A/G | 11q | G | 0.054054054 | 0.068181818 | 0.552591 |
| rs2257212  | SLC15A2          | A/G | 03q | A | 0.450892857 | 0.423423423 | 0.552617 |
| rs7377956  |                  | A/G | 04q | G | 0.256880734 | 0.231818182 | 0.55294  |
| rs3738270  | DKFZp434B1231    | C/T | 01q | C | 0.348214286 | 0.321428571 | 0.553024 |
| rs2104772  | TNC              | A/T | 09q | T | 0.410714286 | 0.4375      | 0.553062 |
| rs1974236  |                  | C/G | 13q | G | 0.086363636 | 0.102678571 | 0.55331  |
| rs3751057  | SCUBE2           | C/G | 11p | G | 0.125       | 0.144144144 | 0.55335  |
| rs11204545 | OR2W3            | A/T | 01q | T | 0.370535714 | 0.397321429 | 0.553561 |
| rs1801701  | APOB             | A/G | 02p | A | 0.102678571 | 0.120535714 | 0.553612 |
| rs7331195  | N6AMT2           | C/G | 13q | C | 0.174107143 | 0.193693694 | 0.553917 |
| rs383835   | KRTAP4-7         | A/T | 17q | A | 0.23364486  | 0.212264151 | 0.554034 |
| rs6453373  | AP3B1, LOC727723 | A/T | 05q | A | 0.0625      | 0.049107143 | 0.554068 |
| rs3772165  | TMEM16K          | C/T | 03p | C | 0.415178571 | 0.388392857 | 0.55435  |
| rs1352891  |                  | A/C | 03q | A | 0.415178571 | 0.387387387 | 0.554679 |
| rs2292307  |                  | A/C | 10q | A | 0.147321429 | 0.129464286 | 0.554767 |
| rs1799971  | OPRM1            | A/G | 06q | G | 0.121621622 | 0.102678571 | 0.554774 |
| rs515192   | STARD13          | G/T | 13q | T | 0.472972973 | 0.5         | 0.554913 |
| rs3730477  | POLL             | C/T | 10q | T | 0.225225225 | 0.201834862 | 0.555305 |
| rs10427252 |                  | A/G | 02q | G | 0.234234234 | 0.209090909 | 0.555352 |
| rs2303650  | KIAA0372         | A/C | 05q | A | 0.18018018  | 0.202702703 | 0.555788 |
| rs836237   |                  | C/T | 02q | T | 0.138392857 | 0.157657658 | 0.555839 |
| rs7194136  | PKD1L2           | C/G | 16q | C | 0.397321429 | 0.369369369 | 0.556219 |
| rs2266690  | CCNH             | C/T | 05q | C | 0.214285714 | 0.236607143 | 0.556268 |
| rs3761202  |                  | C/T | 20q | T | 0.254464286 | 0.232142857 | 0.556415 |
| rs1799966  | BRCA1            | A/G | 17q | G | 0.301801802 | 0.325892857 | 0.557034 |

|            |                 |     |     |   |             |             |          |
|------------|-----------------|-----|-----|---|-------------|-------------|----------|
| rs2057363  |                 | G/T | 09p | G | 0.151785714 | 0.171171171 | 0.55715  |
| rs3733406  | FAT             | C/T | 04q | C | 0.089285714 | 0.107142857 | 0.557174 |
| rs10488532 | SAMD9L          | C/T | 07q | T | 0.125       | 0.107142857 | 0.557351 |
| rs9644251  | LOC730783       | A/T | 08q | A | 0.325892857 | 0.301801802 | 0.55744  |
| rs7929057  | LOC643680       | C/T | 11q | T | 0.135135135 | 0.116071429 | 0.557471 |
| rs2230782  | NCOA3           | C/G | 20q | C | 0.102678571 | 0.086363636 | 0.557599 |
| rs9984077  | GART            | C/T | 21q | C | 0.200892857 | 0.178571429 | 0.55767  |
| rs4384720  |                 | C/G | 02q | C | 0.081081081 | 0.066964286 | 0.557708 |
| rs1042713  | ADRB2           | A/G | 05q | A | 0.353211009 | 0.381818182 | 0.557757 |
| rs8104890  | ZNF614          | C/T | 19q | T | 0.285714286 | 0.3125      | 0.557776 |
| rs7394     | FLJ10769, CARS2 | C/T | 13q | C | 0.241071429 | 0.21875     | 0.557805 |
| rs4290380  |                 | C/T | 13q | C | 0.227678571 | 0.254464286 | 0.557835 |
| rs1203998  | CATSPER1        | A/G | 11q | A | 0.299107143 | 0.272321429 | 0.557994 |
| rs8028332  |                 | C/T | 15q | C | 0.120535714 | 0.102678571 | 0.558154 |
| rs40986    | FBXL21          | A/G | 05q | G | 0.25        | 0.277777778 | 0.558601 |
| rs7961682  | ZNF84           | A/G | 12q | A | 0.190909091 | 0.169642857 | 0.558604 |
| rs10895391 | DYNC2H1         | C/T | 11q | T | 0.339285714 | 0.366071429 | 0.558614 |
| rs1713456  | TEP1            | C/T | 14q | T | 0.196428571 | 0.21875     | 0.55875  |
| rs2286756  |                 | G/T | 19q | G | 0.445945946 | 0.473214286 | 0.558947 |
| rs757081   | NUCB2           | C/G | 11p | C | 0.355855856 | 0.328828829 | 0.558997 |
| rs2233998  | TAS2R4          | C/T | 07q | C | 0.495535714 | 0.468468468 | 0.559154 |
| rs10192036 | IL1RL1          | A/C | 02q | A | 0.06        | 0.046728972 | 0.559364 |
| rs3812762  | ST5             | C/G | 11p | C | 0.339285714 | 0.364864865 | 0.559443 |
| rs1291361  |                 | A/C | 12p | C | 0.34375     | 0.370535714 | 0.55945  |
| rs2270425  | KIAA0317, FCF1  | C/G | 14q | G | 0.183035714 | 0.205357143 | 0.559492 |
| rs2291628  | FBN2            | A/G | 05q | A | 0.071428571 | 0.058035714 | 0.559573 |
| rs3734452  |                 | G/T | 06q | G | 0.240196078 | 0.219387755 | 0.559655 |
| rs1933437  | FLT3            | C/T | 13q | C | 0.415178571 | 0.387387387 | 0.559671 |
| rs2782643  | C1orf84         | C/T | 01p | T | 0.424107143 | 0.450450451 | 0.559932 |
| rs11786747 |                 | A/C | 08q | C | 0.395454546 | 0.419642857 | 0.559937 |
| rs1075372  |                 | A/G | 09q | A | 0.388392857 | 0.415178571 | 0.560036 |
| rs2237051  | EGF             | A/G | 04q | A | 0.334821429 | 0.36036036  | 0.560051 |
| rs3749966  | C6orf10         | C/T | 06p | C | 0.209821429 | 0.232142857 | 0.560105 |
| rs196594   | KIAA1706        | C/T | 07p | T | 0.075892857 | 0.0625      | 0.560112 |
| rs4903104  | PAPLN           | C/T | 14q | T | 0.191964286 | 0.214285714 | 0.560346 |
| rs12280457 | C11orf36        | G/T | 11p | G | 0.424107143 | 0.397321429 | 0.560698 |
| rs2306272  | LRIG1           | C/T | 03p | C | 0.276785714 | 0.303571429 | 0.560769 |

|            |                        |     |     |   |             |             |          |
|------------|------------------------|-----|-----|---|-------------|-------------|----------|
| rs7044405  | OR13J1                 | C/T | 09p | T | 0.370535714 | 0.397321429 | 0.561169 |
| rs11264498 | IQGAP3                 | C/G | 01q | C | 0.339285714 | 0.363636364 | 0.561404 |
| rs6453139  | LOC728780              | C/T | 05q | T | 0.072727273 | 0.056603774 | 0.561549 |
| rs6165     | FSHR                   | A/G | 02p | G | 0.433035714 | 0.459821429 | 0.561614 |
| rs3935944  |                        | C/T | 09q | T | 0.191964286 | 0.213636364 | 0.56173  |
| rs17655    | ERCC5                  | C/G | 13q | G | 0.238738739 | 0.222727273 | 0.561862 |
| rs13317    | FGFR1                  | C/T | 08p | C | 0.191964286 | 0.169642857 | 0.562001 |
| rs6486602  | STX2                   | C/G | 12q | C | 0.334821429 | 0.361607143 | 0.562062 |
| rs6569605  | LAMA2                  | C/T | 06q | C | 0.274774775 | 0.252252252 | 0.562558 |
| rs491208   | OR4M2                  | A/G | 15q | A | 0.102941176 | 0.120192308 | 0.56276  |
| rs4529373  | tcag7.875              | A/T | 07q | A | 0.151785714 | 0.169642857 | 0.562794 |
| rs2230661  | ZNF239                 | G/T | 10q | T | 0.440366973 | 0.468468469 | 0.563142 |
| rs2240233  | KIAA1086               | A/C | 19p | A | 0.428571429 | 0.401785714 | 0.563161 |
| rs1453324  | PKD1L2                 | C/T | 16q | T | 0.174757282 | 0.194174757 | 0.56325  |
| rs7193657  | MVD                    | G/T | 16q | T | 0.142857143 | 0.125       | 0.563557 |
| rs6572635  | LOC283551, hCG_2013212 | A/G | 14q | A | 0.267857143 | 0.294642857 | 0.563658 |
| rs7555310  | OR2M7                  | A/G | 01q | A | 0.236607143 | 0.258928571 | 0.563714 |
| rs543695   |                        | A/C | 11q | A | 0.325892857 | 0.352678571 | 0.563826 |
| rs2273171  | STRN3                  | C/T | 14q | C | 0.45412844  | 0.481981982 | 0.564013 |
| rs3794942  |                        | C/T | 18q | C | 0.071428571 | 0.058035714 | 0.564044 |
| rs6818911  | LOC389217, LOC650865   | C/G | 04q | C | 0.120535714 | 0.104545454 | 0.564215 |
| rs2903150  | C4orf37                | C/T | 04q | C | 0.415178571 | 0.388392857 | 0.564252 |
| rs2274136  | NUP153                 | C/T | 06p | C | 0.214285714 | 0.193693694 | 0.564422 |
| rs4604043  |                        | C/T | 04q | T | 0.321428571 | 0.294642857 | 0.56457  |
| rs557352   | PRUNE2                 | C/T | 09q | T | 0.364864865 | 0.392857143 | 0.56466  |
| rs1851724  | OR13C5                 | C/T | 09q | C | 0.424107143 | 0.45045045  | 0.564923 |
| rs2305027  | COLEC12                | A/G | 18p | A | 0.477678571 | 0.495535714 | 0.565137 |
| rs2076523  | BTNL2                  | A/G | 06p | G | 0.325892857 | 0.351351351 | 0.56515  |
| rs3208941  | OSAP                   | A/G | 04q | A | 0.058035714 | 0.071428571 | 0.565632 |
| rs2232387  | KRT75                  | A/G | 12q | A | 0.144144144 | 0.125       | 0.565662 |
| rs506425   | PLEKHA4                | A/G | 19q | G | 0.308035714 | 0.333333333 | 0.565945 |
| rs2234001  | TAS2R4                 | C/G | 07q | C | 0.491071429 | 0.482142857 | 0.565971 |
| rs741064   | TMEM176A               | C/T | 07q | T | 0.200892857 | 0.18018018  | 0.566018 |
| rs2228547  | COL10A1, NT5DC1        | C/G | 06q | C | 0.104545454 | 0.09009009  | 0.566085 |
| rs2072174  | ZNF596                 | G/T | 08p | G | 0.075892857 | 0.09009009  | 0.566307 |
| rs3731877  | TTLL4                  | C/G | 02q | G | 0.424107143 | 0.450892857 | 0.566491 |
| rs3748357  | RPGRIP1                | A/G | 14q | A | 0.401785714 | 0.375       | 0.566733 |

|            |             |     |     |   |             |             |          |
|------------|-------------|-----|-----|---|-------------|-------------|----------|
| rs3750266  | SLCO5A1     | A/G | 08q | A | 0.472972973 | 0.446428571 | 0.56676  |
| rs140054   | GTSE1       | A/G | 22q | A | 0.080357143 | 0.064814815 | 0.566889 |
| rs1258236  | C10orf53    | A/G | 10q | A | 0.09009009  | 0.075892857 | 0.566946 |
| rs2273313  |             | A/T | 01p | A | 0.21875     | 0.197247706 | 0.56713  |
| rs2611     | HKDC1       | C/G | 10q | G | 0.391891892 | 0.366071429 | 0.567147 |
| rs1864182  | ATG10       | G/T | 05q | G | 0.482142857 | 0.455357143 | 0.567356 |
| rs489144   |             | A/C | 01q | A | 0.080357143 | 0.094594595 | 0.567365 |
| rs1610645  |             | A/G | 06p | G | 0.387387387 | 0.415178571 | 0.567532 |
| rs1044261  | IDI2        | C/T | 10p | T | 0.071428571 | 0.058035714 | 0.567619 |
| rs1958716  | OR4L1       | A/G | 14q | A | 0.485294118 | 0.485576923 | 0.5677   |
| rs11577579 | C1orf125    | A/C | 01q | C | 0.297297297 | 0.321428571 | 0.567736 |
| rs897803   | LOC388503   | C/T | 19p | T | 0.375       | 0.351351351 | 0.568009 |
| rs11098513 | KLHL2       | A/G | 04q | G | 0.231818182 | 0.25        | 0.568024 |
| rs379707   | FYB         | G/T | 05p | G | 0.324468085 | 0.353932584 | 0.568293 |
| rs1036788  |             | C/T | 04q | C | 0.214285714 | 0.191964286 | 0.568374 |
| rs3740996  | TRIM5       | A/G | 11p | A | 0.111607143 | 0.094594595 | 0.568407 |
| rs3748841  | RP4-692D3.1 | A/T | 01p | T | 0.169642857 | 0.15        | 0.568411 |
| rs6506859  |             | C/T | 18q | C | 0.266666667 | 0.293269231 | 0.568789 |
| rs9826     | RORC        | A/G | 01q | G | 0.334821429 | 0.361607143 | 0.568798 |
| rs25688    | TMEM2       | A/G | 09q | A | 0.075892857 | 0.0625      | 0.568971 |
| rs6823734  |             | A/G | 04q | A | 0.276785714 | 0.301801802 | 0.56921  |
| rs10827628 | C10orf112   | A/G | 10p | G | 0.450892857 | 0.477272727 | 0.569213 |
| rs7259041  | ARRDC2      | C/T | 19p | C | 0.1875      | 0.209821429 | 0.569236 |
| rs12610094 | OR7G2       | A/G | 19p | G | 0.427927928 | 0.401785714 | 0.569533 |
| rs4927611  | TPO         | G/T | 02p | T | 0.37962963  | 0.352678571 | 0.569563 |
| rs3814848  | KCNK13      | C/T | 14q | T | 0.066964286 | 0.081081081 | 0.569651 |
| rs6756597  | ASB18       | C/T | 02q | T | 0.45945946  | 0.432432432 | 0.569701 |
| rs412533   | KRT6C       | C/T | 12q | T | 0.294642857 | 0.276785714 | 0.569889 |
| rs1716975  | ULK4        | C/T | 03p | T | 0.174107143 | 0.153153153 | 0.570099 |
| rs832582   | MAP3K1      | A/G | 05q | G | 0.191964286 | 0.171171171 | 0.570237 |
| rs2340917  | TMEM43      | C/T | 03p | C | 0.303571429 | 0.276785714 | 0.57043  |
| rs2013501  | LOC392221   | C/T | 08q | T | 0.357142857 | 0.330357143 | 0.570668 |
| rs297055   | OR5D14      | C/T | 11q | C | 0.27027027  | 0.247747748 | 0.570676 |
| rs1043160  | C2orf24     | C/T | 02q | T | 0.382882883 | 0.410714286 | 0.570684 |
| rs6786453  | LOC729752   | A/G | 03p | G | 0.114678899 | 0.134259259 | 0.570888 |
| rs970720   |             | C/T | 13q | T | 0.409090909 | 0.382882883 | 0.570924 |
| rs10804166 | LOC389073   | C/T | 02q | T | 0.067567568 | 0.081081081 | 0.571011 |

|            |                     |     |     |   |             |             |          |
|------------|---------------------|-----|-----|---|-------------|-------------|----------|
| rs7177192  | CASC5               | C/G | 15q | G | 0.151785714 | 0.171171171 | 0.571181 |
| rs3170660  | ATPBD1B             | A/G | 01p | A | 0.339285714 | 0.364864865 | 0.571196 |
| rs2273442  | C14orf37            | C/G | 14q | G | 0.5         | 0.473214286 | 0.571328 |
| rs1800197  | PROP1               | A/G | 05q | A | 0.274774775 | 0.25        | 0.571455 |
| rs9790     | CLUAP1              | C/T | 16p | T | 0.191964286 | 0.169642857 | 0.571475 |
| rs1975937  | ZNF540              | A/T | 19q | T | 0.2         | 0.177884615 | 0.571516 |
| rs11086730 | LOC729382           | A/G | 20q | A | 0.080357143 | 0.066964286 | 0.571646 |
| rs1870377  | KDR                 | A/T | 04q | A | 0.189189189 | 0.209821429 | 0.57169  |
| rs407731   | ZNF45               | A/G | 19q | A | 0.481981982 | 0.455357143 | 0.571799 |
| rs2253563  | ZNF180              | C/G | 19q | G | 0.348484849 | 0.37755102  | 0.571955 |
| rs4344301  |                     | G/T | 01q | T | 0.205357143 | 0.184684685 | 0.572049 |
| rs628524   | OR5M11              | A/G | 11q | G | 0.267857143 | 0.245535714 | 0.572184 |
| rs4308977  | CR2                 | C/T | 01q | C | 0.303571429 | 0.330357143 | 0.572506 |
| rs6659011  | FAF1                | A/C | 01p | C | 0.103603604 | 0.089285714 | 0.572605 |
| rs2301788  | MAN2B2              | C/T | 04p | C | 0.477272727 | 0.45045045  | 0.572685 |
| rs13706    | CDC6                | A/G | 17q | A | 0.12962963  | 0.111111111 | 0.572893 |
| rs4149313  | ABCA1               | A/G | 09q | G | 0.136363636 | 0.15625     | 0.572961 |
| rs1046480  | TMEM159             | A/G | 16p | A | 0.232142857 | 0.211711712 | 0.57313  |
| rs8042868  | CATSPER2            | C/T | 15q | T | 0.116071429 | 0.099099099 | 0.573244 |
| rs7906894  |                     | C/T | 10p | T | 0.379464286 | 0.352678571 | 0.573388 |
| rs9830253  | COL6A6              | A/G | 03q | G | 0.133928571 | 0.151785714 | 0.573668 |
| rs6926101  | C6orf192            | C/T | 06q | T | 0.0625      | 0.076576577 | 0.573751 |
| rs10878307 | LRRK2               | A/G | 12q | G | 0.075892857 | 0.090909091 | 0.573753 |
| rs10493821 | GBP3                | C/T | 01p | T | 0.361607143 | 0.334821429 | 0.574137 |
| rs3795424  | SYNC1               | A/C | 01p | C | 0.050458716 | 0.063063063 | 0.574159 |
| rs14153    | FAM134B             | A/G | 05p | G | 0.485714286 | 0.486363636 | 0.574262 |
| rs7047726  | FLJ46082            | A/G | 09q | A | 0.1         | 0.084821429 | 0.574441 |
| rs2824804  | PRSS7               | C/T | 21q | C | 0.080357143 | 0.066964286 | 0.574615 |
| rs1190788  | AKAP7               | C/T | 06q | T | 0.387387387 | 0.363636364 | 0.574942 |
| rs2920298  | PSCA                | C/T | 08q | C | 0.397321429 | 0.424107143 | 0.575041 |
| rs1061768  |                     | A/G | 19q | A | 0.190909091 | 0.209821429 | 0.575223 |
| rs7707796  |                     | A/T | 05p | A | 0.071428571 | 0.058558559 | 0.575273 |
| rs6962156  | LOC136143, tcag7.23 | C/T | 07q | C | 0.263392857 | 0.241071429 | 0.575315 |
| rs2061822  | AKAP13              | C/T | 15q | T | 0.296875    | 0.322580645 | 0.575329 |
| rs7910154  |                     | A/G | 10p | A | 0.166666667 | 0.148148148 | 0.575376 |
| rs872013   |                     | C/T | 03q | T | 0.388392857 | 0.361607143 | 0.575406 |
| rs4613098  | METT10D, LOC284009  | C/G | 17p | C | 0.234234234 | 0.258928571 | 0.57542  |

|            |           |     |     |   |             |             |          |
|------------|-----------|-----|-----|---|-------------|-------------|----------|
| rs7858686  |           | C/T | 09p | T | 0.290178571 | 0.265765766 | 0.575468 |
| rs612969   | TECTA     | A/G | 11q | G | 0.392857143 | 0.419642857 | 0.575581 |
| rs1060742  | WDR35     | C/T | 02p | C | 0.075892857 | 0.0625      | 0.575616 |
| rs1070895  | UGT3A1    | C/T | 05p | T | 0.188679245 | 0.209090909 | 0.575698 |
| rs9309428  | AAK1      | C/T | 02p | T | 0.424107143 | 0.450892857 | 0.575989 |
| rs763470   |           | A/G | 11p | G | 0.204545455 | 0.227272727 | 0.576101 |
| rs10495237 | LOC127602 | A/G | 01q | G | 0.084821429 | 0.071428571 | 0.57612  |
| rs3088040  | USP36     | A/G | 17q | A | 0.450892857 | 0.424107143 | 0.576239 |
| rs6693255  | KIAA1799  | C/T | 01p | T | 0.142857143 | 0.162162162 | 0.576281 |
| rs2778979  | PLXDC2    | C/T | 10p | T | 0.071428571 | 0.084821429 | 0.576342 |
| rs8112672  |           | C/T | 19q | T | 0.089285714 | 0.075892857 | 0.576662 |
| rs805408   | PSME4     | A/T | 02p | T | 0.28125     | 0.303571429 | 0.576861 |
| rs2290846  | LRBA      | A/G | 04q | A | 0.245535714 | 0.223214286 | 0.576941 |
| rs2171269  |           | G/T | 03q | T | 0.159090909 | 0.18018018  | 0.577079 |
| rs7131178  | JOSD3     | A/T | 11q | A | 0.195454545 | 0.174107143 | 0.577145 |
| rs3793524  | PTPN3     | C/G | 09q | C | 0.379464286 | 0.352678571 | 0.577281 |
| rs2230660  | ZNF239    | C/G | 10q | C | 0.441964286 | 0.46875     | 0.577418 |
| rs2822786  |           | A/G | 21q | A | 0.350961538 | 0.323809524 | 0.577891 |
| rs7207403  | B4GALNT2  | A/C | 17q | C | 0.486111111 | 0.45754717  | 0.577993 |
| rs7742542  | HBS1L     | G/T | 06q | G | 0.482142857 | 0.455357143 | 0.578175 |
| rs10408510 | WDR87     | A/T | 19q | T | 0.243243243 | 0.265765766 | 0.578225 |
| rs2270004  | PARS2     | A/G | 01p | G | 0.174107143 | 0.153153153 | 0.578557 |
| rs2278239  | CMYA5     | A/C | 05q | C | 0.087962963 | 0.074766355 | 0.57869  |
| rs1065464  |           | C/G | 22q | C | 0.12962963  | 0.113207547 | 0.578765 |
| rs3758276  | DNAJA1    | C/T | 09p | T | 0.261682243 | 0.238738739 | 0.579012 |
| rs10932150 | ZDBF2     | A/G | 02q | A | 0.415178571 | 0.441964286 | 0.579027 |
| rs7974562  |           | C/T | 12q | T | 0.473214286 | 0.5         | 0.579193 |
| rs546589   | ZNF568    | C/T | 19q | T | 0.410714286 | 0.4375      | 0.579343 |
| rs8058922  | RFWD3     | G/T | 16q | G | 0.3125      | 0.339285714 | 0.579432 |
| rs1042779  | ITIH1     | A/G | 03p | G | 0.415178571 | 0.388392857 | 0.579614 |
| rs130076   | CCHCR1    | C/T | 06p | T | 0.196428571 | 0.218181818 | 0.579759 |
| rs358231   | GBA3      | A/T | 04p | T | 0.138392857 | 0.15625     | 0.5798   |
| rs6425977  | THRAP3    | C/T | 01p | C | 0.121621622 | 0.138392857 | 0.580034 |
| rs7657817  | FAM13A1   | C/T | 04q | T | 0.174107143 | 0.15625     | 0.580323 |
| rs1966834  | OR1S1     | C/T | 11q | C | 0.410714286 | 0.4375      | 0.580353 |
| rs409093   | FFAR2     | A/T | 19q | A | 0.081081081 | 0.066964286 | 0.580354 |
| rs529208   | DOCK8     | A/C | 09p | A | 0.5         | 0.468181818 | 0.580699 |

|            |           |     |     |   |             |             |          |
|------------|-----------|-----|-----|---|-------------|-------------|----------|
| rs3746207  | ZNF671    | C/T | 19q | T | 0.160714286 | 0.178571429 | 0.580826 |
| rs662471   | LAMA1     | A/G | 18p | G | 0.346846847 | 0.373873874 | 0.581207 |
| rs12000    | NKAPL     | A/G | 06p | G | 0.209821429 | 0.232142857 | 0.581248 |
| rs6063377  | DDX27     | A/G | 20q | A | 0.425233645 | 0.398148148 | 0.581292 |
| rs12330366 |           | C/T | 03q | C | 0.117117117 | 0.133928571 | 0.581371 |
| rs9261847  |           | G/T | 06p | G | 0.142857143 | 0.126126126 | 0.581876 |
| rs2037607  |           | C/T | 07p | C | 0.433035714 | 0.40625     | 0.581933 |
| rs4027405  | SYNE2     | A/G | 14q | G | 0.108108108 | 0.09375     | 0.582183 |
| rs4493386  |           | A/T | 03p | A | 0.427272727 | 0.450892857 | 0.582229 |
| rs1803155  | AADAC     | A/G | 03q | G | 0.162162162 | 0.181818182 | 0.582256 |
| rs2277046  | DNAH5     | A/G | 05p | G | 0.077981651 | 0.063063063 | 0.582272 |
| rs916358   | PNPLA5    | C/T | 22q | T | 0.1         | 0.116071429 | 0.582323 |
| rs707555   | PCK1      | C/G | 20q | C | 0.138392857 | 0.15625     | 0.582625 |
| rs4148269  | UGT2B15   | A/C | 04q | A | 0.395454545 | 0.369158878 | 0.58275  |
| rs2272583  |           | C/T | 14q | C | 0.183035714 | 0.205357143 | 0.582865 |
| rs7546172  |           | A/G | 01q | G | 0.490990991 | 0.46875     | 0.582881 |
| rs1156526  | ZNF214    | C/T | 11p | T | 0.363636364 | 0.388392857 | 0.582962 |
| rs3759253  |           | A/C | 12p | A | 0.050458716 | 0.04054054  | 0.583036 |
| rs1201689  | MAPKBP1   | C/G | 15q | G | 0.369158879 | 0.345454546 | 0.583303 |
| rs4375849  |           | G/T | 02q | G | 0.178571429 | 0.196428571 | 0.583451 |
| rs3748569  | RHBG      | C/T | 01q | T | 0.401785714 | 0.428571429 | 0.583514 |
| rs2386136  |           | C/T | 09q | T | 0.495535714 | 0.477678571 | 0.583915 |
| rs227584   | C17orf53  | G/T | 17q | G | 0.290178571 | 0.315315315 | 0.584005 |
| rs11230983 | OR5D13    | A/G | 11q | A | 0.13963964  | 0.122727273 | 0.584068 |
| rs3795686  | CCDC21    | C/T | 01p | T | 0.34375     | 0.31981982  | 0.584388 |
| rs10804567 | HEG1      | C/G | 03q | C | 0.375       | 0.351351351 | 0.584563 |
| rs1731017  | ABAT      | C/T | 16p | T | 0.436936937 | 0.40990991  | 0.58471  |
| rs6586145  | LIPF      | A/T | 10q | A | 0.054545454 | 0.066964286 | 0.584891 |
| rs4860273  | LOC339970 | A/G | 04q | G | 0.227678571 | 0.25        | 0.585227 |
| rs3749591  | USP53     | G/T | 04q | G | 0.333333333 | 0.307339449 | 0.58529  |
| rs11657835 | NBR2      | C/G | 17q | G | 0.303571429 | 0.325892857 | 0.585397 |
| rs4859571  | ASAH1     | C/T | 04q | T | 0.232142857 | 0.209821429 | 0.585509 |
| rs4434872  |           | C/T | 01q | T | 0.165178571 | 0.184684685 | 0.585938 |
| rs2273664  | TTC27     | A/G | 02p | A | 0.053571429 | 0.066964286 | 0.585987 |
| rs10788882 | LOC391037 | C/G | 01p | G | 0.303571429 | 0.28125     | 0.585987 |
| rs6647     | SERPINA1  | C/T | 14q | C | 0.198198198 | 0.21875     | 0.586073 |
| rs2288777  | FAT2      | A/G | 05q | G | 0.075892857 | 0.089285714 | 0.58614  |

|            |               |     |     |   |             |             |          |
|------------|---------------|-----|-----|---|-------------|-------------|----------|
| rs600753   | DYX1C1        | C/T | 15q | C | 0.491071429 | 0.482142857 | 0.586145 |
| rs594445   | MOCOS         | A/C | 18q | A | 0.316964286 | 0.294642857 | 0.586178 |
| rs3813609  | ARHGAP30      | C/G | 01q | G | 0.369369369 | 0.394495413 | 0.586211 |
| rs3741138  | PAAF1         | C/G | 11q | C | 0.108108108 | 0.125       | 0.586276 |
| rs4852974  | NAT8B         | A/G | 02p | A | 0.285714286 | 0.267857143 | 0.586318 |
| rs1781935  | AKR1CL1       | C/G | 10p | C | 0.446428571 | 0.423423423 | 0.586467 |
| rs2255703  | PLXND1        | C/T | 03q | C | 0.401785714 | 0.375       | 0.586812 |
| rs226891   | CP110         | C/G | 16p | C | 0.140625    | 0.157894737 | 0.586839 |
| rs10502151 | ALG9          | C/T | 11q | T | 0.334821429 | 0.357142857 | 0.587087 |
| rs3822307  |               | C/T | 04q | T | 0.316037736 | 0.291666667 | 0.587516 |
| rs6426196  |               | C/T | 01q | C | 0.174311927 | 0.155660377 | 0.58755  |
| rs4145944  | ATP10D        | C/G | 04p | G | 0.357142857 | 0.330357143 | 0.587991 |
| rs7110845  | POU2F3        | A/G | 11q | A | 0.489473684 | 0.462765957 | 0.588579 |
| rs11245007 | C10orf90      | C/T | 10q | T | 0.261261261 | 0.28125     | 0.589244 |
| rs2032729  | ZNF24         | A/G | 18q | A | 0.1         | 0.084821429 | 0.589296 |
| rs4316004  |               | C/G | 06p | C | 0.148648649 | 0.166666667 | 0.589354 |
| rs698761   | SLC3A1, PREPL | A/G | 02p | G | 0.28125     | 0.304545455 | 0.589404 |
| rs2295119  |               | A/C | 06p | A | 0.140909091 | 0.123853211 | 0.589472 |
| rs1134586  | C1orf176      | C/T | 01p | T | 0.159090909 | 0.140909091 | 0.58948  |
| rs2839500  | TMPRSS3       | C/T | 21q | C | 0.09009009  | 0.075892857 | 0.589589 |
| rs1042364  | ADH4          | A/G | 04q | A | 0.25        | 0.272321429 | 0.589777 |
| rs2295340  | C20orf27      | C/T | 20p | C | 0.359090909 | 0.333333333 | 0.589804 |
| rs6586179  | LIPA          | C/T | 10q | T | 0.138392857 | 0.121621622 | 0.590055 |
| rs6103     | SERPINB2      | C/G | 18q | G | 0.247747748 | 0.227678571 | 0.590187 |
| rs2240089  | COBL          | C/G | 07p | C | 0.190909091 | 0.171171171 | 0.590279 |
| rs2475298  | SEC23IP       | C/T | 10q | T | 0.31981982  | 0.34375     | 0.590935 |
| rs7112649  | GVIN1         | C/G | 11p | G | 0.423423423 | 0.397321429 | 0.591403 |
| rs216462   |               | C/T | 17q | T | 0.147321429 | 0.129464286 | 0.591476 |
| rs4414223  | SNX19         | C/T | 11q | T | 0.366071429 | 0.388392857 | 0.591648 |
| rs2832873  | KRTAP15-1     | A/C | 21q | C | 0.463963964 | 0.439814815 | 0.591659 |
| rs4666689  | FLJ44048      | C/T | 02q | T | 0.131818182 | 0.116071429 | 0.591711 |
| rs7311420  |               | A/G | 12q | A | 0.476635514 | 0.448113207 | 0.591893 |
| rs2250860  | WFDC8         | C/T | 20q | C | 0.405405405 | 0.381818182 | 0.591924 |
| rs12437204 | C14orf143     | A/T | 14q | T | 0.193396226 | 0.210280374 | 0.591953 |
| rs3188055  | INPP5F        | A/G | 10q | G | 0.322727273 | 0.346846847 | 0.592042 |
| rs787795   | BMS1          | A/G | 10q | G | 0.174107143 | 0.15625     | 0.59233  |
| rs6280     | DRD3          | C/T | 03q | C | 0.3125      | 0.334821429 | 0.592428 |



|            |                    |     |     |   |             |             |          |
|------------|--------------------|-----|-----|---|-------------|-------------|----------|
| rs2236225  | MTHFD1             | C/T | 14q | T | 0.410714286 | 0.433035714 | 0.592696 |
| rs11109968 | ANKS1B, FAM71C     | C/G | 12q | G | 0.3125      | 0.290178571 | 0.592807 |
| rs10067    | OVGP1              | C/G | 01p | C | 0.075892857 | 0.089285714 | 0.592984 |
| rs7653652  | ZNF654             | C/T | 03p | T | 0.125       | 0.142857143 | 0.593152 |
| rs1012899  | LRRC16             | A/G | 06p | G | 0.223214286 | 0.245535714 | 0.593541 |
| rs6671010  | SYT6               | C/G | 01p | C | 0.439814815 | 0.463963964 | 0.593578 |
| rs2916414  | OTOP1              | A/T | 04p | A | 0.316964286 | 0.294642857 | 0.593922 |
| rs1390963  | FBXO16             | C/T | 08p | T | 0.290178571 | 0.313636364 | 0.593966 |
| rs2824721  | PRSS7              | A/G | 21q | G | 0.27027027  | 0.293577982 | 0.594023 |
| rs799917   | BRCA1              | C/T | 17q | T | 0.316964286 | 0.339285714 | 0.594108 |
| rs4267387  |                    | A/G | 17q | G | 0.337837838 | 0.363636364 | 0.594108 |
| rs510579   | C6orf118           | A/C | 06q | C | 0.359813084 | 0.385321101 | 0.594184 |
| rs2274419  | MUSK               | C/T | 09q | T | 0.151785714 | 0.133928571 | 0.594422 |
| rs4241344  | ARHGAP25           | G/T | 02p | T | 0.184684685 | 0.202702703 | 0.594455 |
| rs6118971  |                    | C/T | 20q | T | 0.245535714 | 0.268181818 | 0.594768 |
| rs565629   | FLJ41733           | A/G | 21q | A | 0.482142857 | 0.491071429 | 0.594935 |
| rs6668857  | RHBG               | A/G | 01q | A | 0.495454545 | 0.468468468 | 0.595029 |
| rs3825548  | C14orf49           | C/G | 14q | G | 0.341346154 | 0.317757009 | 0.595081 |
| rs4424652  | IGSF22             | C/T | 11p | C | 0.267857143 | 0.245535714 | 0.595211 |
| rs4808206  | FLJ44968           | A/C | 19p | A | 0.240740741 | 0.222222222 | 0.595348 |
| rs10054110 | FLJ40243           | A/T | 05p | T | 0.378378378 | 0.352678571 | 0.595503 |
| rs2295275  | TRERF1             | A/T | 06p | A | 0.09009009  | 0.075892857 | 0.595598 |
| rs5747211  | CECR2              | A/G | 22q | A | 0.104761905 | 0.122641509 | 0.595689 |
| rs10807020 | ZNF391             | A/G | 06p | A | 0.254464286 | 0.232142857 | 0.595771 |
| rs10471774 | CCDC125            | C/T | 05q | T | 0.472972973 | 0.446428571 | 0.595816 |
| rs10876100 | TMPRSS12           | C/T | 12q | C | 0.200892857 | 0.220720721 | 0.59582  |
| rs2484180  | PTCHD3             | A/C | 10p | C | 0.445945946 | 0.419642857 | 0.595887 |
| rs6957669  | tcag7.441          | A/G | 07q | A | 0.202702703 | 0.225225225 | 0.595904 |
| rs3861512  | OR4K15             | A/T | 14q | A | 0.254464286 | 0.276785714 | 0.596141 |
| rs919364   | DKKL1              | A/G | 19q | A | 0.290178571 | 0.310810811 | 0.596625 |
| rs3749004  | XIRP2              | A/G | 02q | G | 0.102678571 | 0.120535714 | 0.596835 |
| rs11264875 | NUP210L            | C/T | 01q | T | 0.267857143 | 0.290178571 | 0.596957 |
| rs1127233  | MUC13              | A/C | 03q | C | 0.241071429 | 0.263392857 | 0.597105 |
| rs1017219  | KCNA7              | A/G | 19q | G | 0.383928571 | 0.36036036  | 0.597152 |
| rs2233901  | SEMG2              | A/G | 20q | A | 0.280898876 | 0.303191489 | 0.597161 |
| rs573122   |                    | A/G | 11q | A | 0.352678571 | 0.328828829 | 0.597167 |
| rs10110831 | C8orf34, LOC728774 | C/T | 08q | T | 0.089285714 | 0.075892857 | 0.597177 |

|            |           |     |     |   |             |             |          |
|------------|-----------|-----|-----|---|-------------|-------------|----------|
| rs1626593  |           | C/T | 16q | T | 0.151785714 | 0.168181818 | 0.59718  |
| rs2596913  |           | A/G | 03p | A | 0.378378378 | 0.403669725 | 0.597486 |
| rs538338   |           | A/G | 03q | G | 0.136363636 | 0.118181818 | 0.597618 |
| rs2070065  | CENPF     | C/G | 01q | G | 0.089285714 | 0.103603604 | 0.59771  |
| rs2273329  |           | A/G | 20p | A | 0.133928571 | 0.151785714 | 0.597815 |
| rs2070121  | HLA-DOB   | C/T | 06p | T | 0.084821429 | 0.098214286 | 0.598028 |
| rs2148493  |           | A/G | 10q | G | 0.321100917 | 0.297029703 | 0.598144 |
| rs3735007  | ZC3HAV1   | C/T | 07q | C | 0.454954955 | 0.481981982 | 0.598221 |
| rs712270   | MYO15A    | A/T | 17p | A | 0.388392857 | 0.410714286 | 0.598315 |
| rs7354779  | DNMT3L    | C/T | 21q | C | 0.258928571 | 0.236607143 | 0.598625 |
| rs2282683  | GCNT1     | A/G | 09q | G | 0.184684685 | 0.204545455 | 0.598863 |
| rs10882993 | ZFYVE27   | G/T | 10q | G | 0.25        | 0.22972973  | 0.599122 |
| rs12654078 | NBPF22P   | C/T | 05q | T | 0.089285714 | 0.104545455 | 0.599208 |
| rs2617667  | ZNF813    | C/T | 19q | T | 0.177272727 | 0.157407407 | 0.599269 |
| rs4319261  | MYOM3     | C/G | 01p | G | 0.477678571 | 0.5         | 0.599635 |
| rs6519443  | LOC388882 | C/G | 22q | C | 0.290909091 | 0.268181818 | 0.599868 |
| rs2306033  | LRP4      | A/G | 11p | A | 0.147321429 | 0.130630631 | 0.600029 |
| rs9754433  | USP41     | G/T | 22q | T | 0.254464286 | 0.274774775 | 0.600132 |
| rs3755899  | UGDH      | A/G | 04p | A | 0.086363636 | 0.071428571 | 0.60022  |
| rs3745775  | ZNF790    | A/G | 19q | G | 0.308035714 | 0.283783784 | 0.600479 |
| rs3731686  | SULT1C4   | A/G | 02q | G | 0.085585586 | 0.072727273 | 0.6006   |
| rs1760897  | TEP1      | C/T | 14q | C | 0.337962963 | 0.3125      | 0.600866 |
| rs2023194  |           | A/G | 16p | G | 0.409090909 | 0.386363636 | 0.600949 |
| rs6710817  | NAG       | C/T | 02p | T | 0.066964286 | 0.080357143 | 0.601082 |
| rs1867504  |           | A/G | 03q | G | 0.486607143 | 0.490990991 | 0.601242 |
| rs3190103  |           | A/G | 12q | A | 0.397321429 | 0.372727273 | 0.601246 |
| rs7792760  | MYO1G     | C/T | 07p | T | 0.165178571 | 0.147321429 | 0.601384 |
| rs2017252  | ZNF273    | A/C | 07q | C | 0.5         | 0.473214286 | 0.601547 |
| rs2306899  | DDHD2     | A/G | 08p | A | 0.184684685 | 0.163636364 | 0.601851 |
| rs7185     | FARSB     | C/T | 02q | C | 0.15625     | 0.174107143 | 0.602038 |
| rs2294228  | SEPN1     | G/T | 01p | G | 0.238738739 | 0.21875     | 0.602106 |
| rs6784095  | KIAA1407  | A/T | 03q | A | 0.111607143 | 0.126126126 | 0.60243  |
| rs1845939  | ZFP2      | C/G | 05q | G | 0.254464286 | 0.276785714 | 0.602543 |
| rs1496948  | ZFP2      | A/G | 05q | A | 0.254464286 | 0.276785714 | 0.602543 |
| rs2076156  | TTLL1     | A/G | 22q | G | 0.067567568 | 0.080357143 | 0.602836 |
| rs2918538  |           | A/C | 03p | A | 0.227678571 | 0.247747748 | 0.603114 |
| rs1047685  |           | C/T | 02p | T | 0.401785714 | 0.379464286 | 0.603408 |

|            |                 |     |     |   |             |             |          |
|------------|-----------------|-----|-----|---|-------------|-------------|----------|
| rs1056042  | SPATA6          | A/G | 01p | A | 0.40625     | 0.428571429 | 0.603475 |
| rs7224723  | ZNF287          | G/T | 17p | G | 0.072072072 | 0.058035714 | 0.603555 |
| rs10282493 | ICA1            | A/T | 07p | A | 0.183035714 | 0.165178571 | 0.603567 |
| rs9896256  |                 | C/T | 17p | T | 0.410714286 | 0.4375      | 0.603601 |
| rs961360   | R3HDM1          | C/T | 02q | C | 0.202830189 | 0.224770642 | 0.603675 |
| rs42524    | COL1A2          | C/G | 07q | C | 0.283783784 | 0.263392857 | 0.603822 |
| rs358733   | C3orf33         | A/G | 03q | G | 0.247663551 | 0.223300971 | 0.604135 |
| rs11889349 | VWA3B           | A/G | 02q | G | 0.45945946  | 0.481981982 | 0.604169 |
| rs1397706  | LY75            | A/G | 02q | A | 0.080357143 | 0.09375     | 0.604225 |
| rs3745902  | KIR3DL2         | C/T | 19q | T | 0.294642857 | 0.272321429 | 0.604601 |
| rs1592624  | CSMD3           | G/T | 08q | T | 0.416666667 | 0.390476191 | 0.604627 |
| rs1786263  | CEP192          | A/C | 18p | C | 0.330357143 | 0.352678571 | 0.604662 |
| rs2272994  | ZNF643          | A/G | 01p | A | 0.198198198 | 0.218181818 | 0.604934 |
| rs10792043 | OR5M10          | A/C | 11q | C | 0.316964286 | 0.339285714 | 0.605405 |
| rs7898509  |                 | C/T | 10q | T | 0.189189189 | 0.209821429 | 0.605443 |
| rs4975017  | KLB             | A/C | 04p | A | 0.321428571 | 0.299107143 | 0.605466 |
| rs11845046 | MIA2            | A/G | 14q | G | 0.220720721 | 0.243119266 | 0.605705 |
| rs11982602 |                 | A/G | 07q | G | 0.128440367 | 0.145454546 | 0.605756 |
| rs1874045  | CSMD2           | C/T | 01p | C | 0.436936937 | 0.410714286 | 0.605836 |
| rs1962519  | MYOM1           | A/G | 18p | G | 0.382882883 | 0.405405405 | 0.606105 |
| rs9304763  | PTPRH           | C/G | 19q | G | 0.321428571 | 0.34375     | 0.606179 |
| rs4981242  |                 | A/C | 14q | A | 0.370535714 | 0.34375     | 0.606209 |
| rs12514417 | ALDH7A1         | G/T | 05q | G | 0.080357143 | 0.094594595 | 0.606211 |
| rs250430   | APBB3           | C/T | 05q | T | 0.129464286 | 0.112612613 | 0.606377 |
| rs7196016  | CCDC135         | C/G | 16q | C | 0.21875     | 0.198198198 | 0.606397 |
| rs9333269  | ITGA8           | A/C | 10p | C | 0.099099099 | 0.084821429 | 0.606415 |
| rs2229857  | ADAR            | A/G | 01q | A | 0.304545454 | 0.325892857 | 0.606416 |
| rs324981   | NPSR1, AAA1     | A/T | 07p | T | 0.406542056 | 0.379807692 | 0.606526 |
| rs3130639  |                 | C/T | 06p | T | 0.241071429 | 0.263392857 | 0.606553 |
| rs9568497  | GUCY1B2         | C/T | 13q | T | 0.40625     | 0.383928571 | 0.606994 |
| rs2153466  | OR4K15          | A/G | 14q | G | 0.276785714 | 0.299107143 | 0.606996 |
| rs1181883  | CCDC27          | A/G | 01p | G | 0.427272727 | 0.450892857 | 0.606997 |
| rs1057090  | MCPH1           | C/T | 08p | T | 0.40625     | 0.381818182 | 0.607144 |
| rs3745964  | RASGRP4, FAM98C | A/G | 19q | A | 0.072072072 | 0.084821429 | 0.607185 |
| rs4955418  | CCDC71          | A/G | 03p | A | 0.363636364 | 0.339622641 | 0.607198 |
| rs3131787  | SFTPG           | A/G | 06p | G | 0.2         | 0.18018018  | 0.607365 |
| rs299284   | HMMR            | C/T | 05q | T | 0.138392857 | 0.121621622 | 0.607493 |

|            |                      |     |     |   |             |             |          |
|------------|----------------------|-----|-----|---|-------------|-------------|----------|
| rs1776148  | EXO1                 | A/G | 01q | A | 0.352678571 | 0.373873874 | 0.607586 |
| rs1045706  | PJA2                 | A/G | 05q | A | 0.432432432 | 0.40990991  | 0.608024 |
| rs10830902 | FAT3                 | C/T | 11q | T | 0.066964286 | 0.080357143 | 0.608092 |
| rs10272498 | ZNF716               | C/T | 07p | C | 0.388392857 | 0.366071429 | 0.608484 |
| rs4942951  | LOC647166, LOC652259 | A/C | 13q | C | 0.34375     | 0.321428571 | 0.608732 |
| rs1063478  |                      | C/T | 06p | T | 0.12254902  | 0.140186916 | 0.608733 |
| rs3844283  | IRAK2                | C/G | 03p | C | 0.45        | 0.424107143 | 0.609151 |
| rs3744741  | GEMIN4               | C/T | 17p | T | 0.147321429 | 0.129464286 | 0.60919  |
| rs6807362  | HTR3C                | C/G | 03q | G | 0.473214286 | 0.450450451 | 0.609502 |
| rs7659136  |                      | C/T | 04q | T | 0.098214286 | 0.084821429 | 0.609777 |
| rs2032844  | TTLL6                | G/T | 17q | T | 0.223404255 | 0.202247191 | 0.609907 |
| rs200910   |                      | C/T | 10p | T | 0.495535714 | 0.473214286 | 0.610002 |
| rs9608956  | SEC14L4              | C/T | 22q | C | 0.276785714 | 0.254464286 | 0.610102 |
| rs11657804 | ABCA10               | C/T | 17q | C | 0.355855856 | 0.379464286 | 0.61074  |
| rs3785521  | TBCD                 | A/G | 17q | A | 0.263392857 | 0.28440367  | 0.610816 |
| rs2240090  | COBL                 | C/T | 07p | C | 0.331818182 | 0.307339449 | 0.610941 |
| rs6468694  | VPS13B               | A/G | 08q | A | 0.135135135 | 0.118181818 | 0.611175 |
| rs1056408  | ARHGAP28             | G/T | 18p | T | 0.130630631 | 0.116071429 | 0.611659 |
| rs6464573  | OR2A5                | G/T | 07q | T | 0.290909091 | 0.3125      | 0.611678 |
| rs4292649  |                      | C/G | 08p | C | 0.401785714 | 0.424107143 | 0.612039 |
| rs4522091  | LARP5                | G/T | 10p | T | 0.163551402 | 0.179245283 | 0.612109 |
| rs6058961  | LOC388795            | A/G | 20q | G | 0.245454546 | 0.225225225 | 0.612186 |
| rs1867503  |                      | A/G | 03q | A | 0.486607143 | 0.491071429 | 0.61226  |
| rs798084   | LOC730909            | A/G | 15q | A | 0.313636364 | 0.337962963 | 0.61241  |
| rs11204816 | LOC650468, LOC729130 | A/G | 01q | A | 0.355855856 | 0.369158878 | 0.612537 |
| rs2228315  | SELPLG               | A/G | 12q | A | 0.069444444 | 0.081818182 | 0.612567 |
| rs10487648 | PCLO                 | A/C | 07q | C | 0.177272727 | 0.157407407 | 0.612587 |
| rs701865   | PDE6C                | A/T | 10q | A | 0.375       | 0.351351351 | 0.612604 |
| rs1208285  |                      | C/T | 06q | C | 0.352678571 | 0.375       | 0.612767 |
| rs2279269  | DSEL                 | A/G | 18q | A | 0.482142857 | 0.495535714 | 0.612841 |
| rs10875561 |                      | A/T | 05q | A | 0.455357143 | 0.477678571 | 0.613025 |
| rs4759893  |                      | A/G | 12q | A | 0.436936937 | 0.463963964 | 0.613123 |
| rs2228209  | HIVEP1               | C/T | 06p | T | 0.388392857 | 0.366071429 | 0.613225 |
| rs521695   |                      | G/T | 15q | G | 0.481981982 | 0.459821429 | 0.613413 |
| rs10894006 | LOC729672            | A/C | 11q | A | 0.339285714 | 0.36036036  | 0.613496 |
| rs3795842  | FAM71A               | C/T | 01q | C | 0.352678571 | 0.375       | 0.613515 |
| rs4668246  | MYO3B                | A/G | 02q | G | 0.366071429 | 0.388392857 | 0.613634 |

|            |                    |     |     |   |             |             |          |
|------------|--------------------|-----|-----|---|-------------|-------------|----------|
| rs273532   | LRRC37A, LRRC37A3  | C/T | 17q | T | 0.214285714 | 0.200892857 | 0.613819 |
| rs637186   | CD5                | A/G | 11q | A | 0.084821429 | 0.071428571 | 0.613855 |
| rs2056900  | CYP4A22, LOC654164 | C/T | 01p | T | 0.220720721 | 0.200892857 | 0.614018 |
| rs10371    | ACOT12             | C/T | 05q | T | 0.169811321 | 0.151515152 | 0.614168 |
| rs9294631  | EGFL10             | A/G | 06q | A | 0.357142857 | 0.381818182 | 0.614243 |
| rs7535953  | LOC127602          | A/G | 01q | A | 0.472727273 | 0.45045045  | 0.614285 |
| rs10513762 | MRPL47             | C/T | 03q | T | 0.066964286 | 0.080357143 | 0.61453  |
| rs3741486  | GOLGA3             | A/G | 12q | A | 0.258928571 | 0.28125     | 0.614647 |
| rs9290923  |                    | C/G | 03q | C | 0.340909091 | 0.321100917 | 0.614717 |
| rs241941   | LOC644554          | C/G | 19q | C | 0.243243243 | 0.263392857 | 0.615004 |
| rs3088142  | DUSP13             | C/T | 10q | T | 0.450892857 | 0.428571429 | 0.615155 |
| rs11254413 | TRDMT1             | A/G | 10p | A | 0.414285714 | 0.435       | 0.615161 |
| rs2241883  | FABP1              | C/T | 02p | C | 0.366071429 | 0.387387387 | 0.615166 |
| rs1061828  | SCAMP4             | C/T | 19p | C | 0.316964286 | 0.294642857 | 0.615398 |
| rs7035276  | C9orf39            | C/T | 09p | C | 0.13963964  | 0.157657658 | 0.615677 |
| rs7131665  |                    | C/T | 11p | C | 0.401785714 | 0.424107143 | 0.615769 |
| rs3742636  | SIX4               | A/C | 14q | A | 0.328828829 | 0.352678571 | 0.615854 |
| rs709783   | WDR63              | A/G | 01p | A | 0.178571429 | 0.160714286 | 0.615918 |
| rs5743611  | TLR1, LOC651738    | C/G | 04p | C | 0.080357143 | 0.066964286 | 0.616277 |
| rs11716994 | LOC339879          | C/T | 03p | T | 0.146788991 | 0.162162162 | 0.616608 |
| rs2589957  | ZNF774             | A/G | 15q | G | 0.436936937 | 0.459821429 | 0.616631 |
| rs7971718  | OVOS2              | A/G | 12p | A | 0.379464286 | 0.357142857 | 0.61671  |
| rs4859905  | FRAS1              | A/G | 04q | G | 0.387387387 | 0.410714286 | 0.617113 |
| rs6489400  | hCG_1642354        | A/T | 12p | A | 0.15625     | 0.138392857 | 0.617196 |
| rs4842489  | WDR51B             | C/G | 12q | C | 0.220720721 | 0.241071429 | 0.61727  |
| rs10832975 | IGSF22             | C/G | 11p | G | 0.415178571 | 0.4375      | 0.617298 |
| rs9309024  | C2orf58            | C/T | 02p | T | 0.161616162 | 0.144329897 | 0.617407 |
| rs9934227  | TEPP               | A/G | 16q | G | 0.136363636 | 0.153153153 | 0.617633 |
| rs3858203  | NEBL               | A/C | 10p | C | 0.34375     | 0.328828829 | 0.617732 |
| rs482912   | LAMP3              | A/G | 03q | A | 0.328571429 | 0.349514563 | 0.61776  |
| rs2230806  | ABCA1              | A/G | 09q | A | 0.299107143 | 0.321428571 | 0.61788  |
| rs7301400  | TMEM132C           | C/T | 12q | T | 0.075892857 | 0.089285714 | 0.617889 |
| rs4909951  | ASCL3              | A/C | 11p | C | 0.330357143 | 0.352678571 | 0.617902 |
| rs11117358 | BANP               | A/T | 16q | A | 0.227678571 | 0.207207207 | 0.618078 |
| rs11867808 | HAP1               | A/G | 17q | A | 0.366071429 | 0.388392857 | 0.618168 |
| rs25414    | ARSB               | C/T | 05q | T | 0.091346154 | 0.105769231 | 0.618254 |
| rs2155587  | TMEM123            | A/G | 11q | A | 0.112612613 | 0.098214286 | 0.618283 |

|            |                  |     |     |   |             |             |          |
|------------|------------------|-----|-----|---|-------------|-------------|----------|
| rs2872892  |                  | G/T | 13q | G | 0.089285714 | 0.102678571 | 0.618423 |
| rs3748697  | CENPF            | A/G | 01q | A | 0.482142857 | 0.459821429 | 0.618617 |
| rs3218651  | POLQ             | A/G | 03q | G | 0.142857143 | 0.12371134  | 0.619372 |
| rs6512087  | CIB3             | C/T | 19p | C | 0.214285714 | 0.234234234 | 0.619405 |
| rs11844594 | C14orf174, TMED8 | C/T | 14q | C | 0.463636364 | 0.486111111 | 0.619418 |
| rs11156878 | KIAA0391         | A/G | 14q | G | 0.13963964  | 0.15625     | 0.619447 |
| rs2290182  | CMTM2            | A/G | 16q | G | 0.125       | 0.108108108 | 0.619618 |
| rs3740030  | SLC16A12         | A/C | 10q | C | 0.066964286 | 0.080357143 | 0.619887 |
| rs11037720 | ALKBH3           | A/G | 11p | G | 0.224770642 | 0.205357143 | 0.62006  |
| rs3827103  | MC3R             | A/G | 20q | A | 0.075892857 | 0.089285714 | 0.620298 |
| rs1418843  | OR10R2           | C/T | 01q | T | 0.432432432 | 0.454954955 | 0.620357 |
| rs4860275  | LOC339970        | A/G | 04q | A | 0.234234234 | 0.254464286 | 0.620437 |
| rs3739567  | FAM125B          | A/G | 09q | G | 0.28125     | 0.304545455 | 0.620573 |
| rs3739038  | LRRFIP1          | C/G | 02q | C | 0.25        | 0.27027027  | 0.620789 |
| rs1126483  | ENPEP            | C/T | 04q | T | 0.459821429 | 0.4375      | 0.621209 |
| rs1380154  | HSPA4L           | C/T | 04q | T | 0.361607143 | 0.339285714 | 0.621214 |
| rs7296162  | KIAA0701         | A/G | 12q | A | 0.075892857 | 0.089285714 | 0.621323 |
| rs9898301  | FLJ46026         | C/T | 17q | T | 0.209821429 | 0.191964286 | 0.621567 |
| rs705      | SNRPN            | C/T | 15q | C | 0.419642857 | 0.441441441 | 0.621652 |
| rs7233515  | KATNAL2          | A/G | 18q | A | 0.375       | 0.395454545 | 0.621732 |
| rs1382602  | C1orf94          | C/G | 01p | C | 0.265765766 | 0.245535714 | 0.621874 |
| rs393152   | C17orf69         | A/G | 17q | G | 0.191964286 | 0.209821429 | 0.622236 |
| rs10768448 | OR51L1           | C/T | 11p | T | 0.256756757 | 0.277272727 | 0.622351 |
| rs1052690  | C9orf103         | A/C | 09q | C | 0.169642857 | 0.1875      | 0.622458 |
| rs4638420  | LOC650794        | A/G | 13q | A | 0.200892857 | 0.181818182 | 0.62254  |
| rs7329320  |                  | C/T | 13q | C | 0.459821429 | 0.436936937 | 0.622651 |
| rs1422645  | CALCOCO2         | C/G | 17q | C | 0.3         | 0.322727273 | 0.623051 |
| rs194525   | STEAP2           | G/T | 07q | G | 0.151785714 | 0.169642857 | 0.623357 |
| rs2866413  | MANBA            | A/G | 04q | G | 0.495412844 | 0.476415094 | 0.623756 |
| rs3745765  | HKR1             | A/C | 19q | A | 0.200892857 | 0.18018018  | 0.623758 |
| rs11219508 | OR8G2            | C/T | 11q | C | 0.292792793 | 0.3125      | 0.623879 |
| rs5764214  | EFCAB6           | C/T | 22q | C | 0.481981982 | 0.459821429 | 0.623923 |
| rs2301843  | KIAA1086         | C/T | 19p | T | 0.424107143 | 0.401785714 | 0.623989 |
| rs1057027  | IFI16            | A/C | 01q | C | 0.183035714 | 0.200892857 | 0.624347 |
| rs6657250  | USH2A            | A/G | 01q | A | 0.339285714 | 0.316964286 | 0.624633 |
| rs10771314 | TM7SF3           | A/G | 12p | A | 0.089285714 | 0.075892857 | 0.624671 |
| rs4909945  | MRVI1            | C/T | 11p | T | 0.34375     | 0.31981982  | 0.624716 |

|            |                |     |     |   |             |              |          |
|------------|----------------|-----|-----|---|-------------|--------------|----------|
| rs36686    | B3GNT3         | A/G | 19p | G | 0.254545455 | 0.274774775  | 0.625005 |
| rs4868479  |                | G/T | 05q | G | 0.297297297 | 0.316964286  | 0.625084 |
| rs1783174  | PKHD1L1        | A/G | 08q | A | 0.153153153 | 0.138392857  | 0.625222 |
| rs4903497  | C14orf166B     | C/T | 14q | C | 0.094594595 | 0.109090909  | 0.625349 |
| rs6739251  |                | A/G | 02q | G | 0.178571429 | 0.160714286  | 0.625446 |
| rs3743599  | ADAT1          | A/C | 16q | A | 0.063063063 | 0.075892857  | 0.625555 |
| rs9624     | TPPP2, RNASE13 | G/T | 14q | T | 0.112612613 | 0.129464286  | 0.625744 |
| rs11228710 | OR5AR1         | C/T | 11q | C | 0.290178571 | 0.309090909  | 0.625788 |
| rs10799790 | LUZP1          | C/T | 01p | C | 0.15625     | 0.175675676  | 0.625834 |
| rs443751   | C1orf163       | A/G | 01p | G | 0.333333333 | 0.308035714  | 0.625853 |
| rs2961663  |                | C/T | 05q | T | 0.130630631 | 0.116071429  | 0.626193 |
| rs12208559 | TNXB           | C/G | 06p | C | 0.138392857 | 0.125        | 0.626707 |
| rs8192678  | PPARGC1A       | A/G | 04p | A | 0.379464286 | 0.357142857  | 0.62685  |
| rs8111785  | ZNF136         | G/T | 19p | T | 0.09375     | 0.107142857  | 0.626869 |
| rs11783941 | CCNE2          | C/T | 08q | T | 0.202702703 | 0.184684685  | 0.627093 |
| rs4629709  | C6orf191       | A/G | 06q | A | 0.153153153 | 0.169642857  | 0.627312 |
| rs7135574  | FGD6           | C/T | 12q | C | 0.190909091 | 0.2117111712 | 0.627383 |
| rs3732559  |                | A/C | 03q | C | 0.34375     | 0.321428571  | 0.627616 |
| rs10516487 | BANK1          | C/T | 04q | T | 0.335164835 | 0.310344828  | 0.627619 |
| rs878830   | KIRREL3        | A/T | 11q | T | 0.316964286 | 0.339285714  | 0.627776 |
| rs2666839  | CENPF          | C/T | 01q | T | 0.085585586 | 0.098214286  | 0.627833 |
| rs878480   |                | C/T | 13q | T | 0.135135135 | 0.120535714  | 0.627926 |
| rs6019     | F5             | C/G | 01q | C | 0.063157895 | 0.075757576  | 0.62813  |
| rs2076324  | PRDM2          | A/T | 01p | T | 0.31981982  | 0.339449541  | 0.628715 |
| rs675      | APOA4          | A/T | 11q | A | 0.21875     | 0.200892857  | 0.628723 |
| rs2638525  | KRT4           | A/G | 12q | A | 0.155963303 | 0.172897196  | 0.628791 |
| rs10779690 |                | C/T | 01p | C | 0.282407407 | 0.305555556  | 0.629211 |
| rs11132306 | CCDC110        | A/G | 04q | A | 0.486607143 | 0.490990991  | 0.629372 |
| rs2281820  | MLN            | C/T | 06p | T | 0.379464286 | 0.357142857  | 0.629401 |
| rs3192149  | TOPBP1         | A/C | 03q | A | 0.241071429 | 0.223214286  | 0.629831 |
| rs2271381  | LY75           | A/T | 02q | T | 0.272321429 | 0.292792793  | 0.630005 |
| rs7529205  |                | A/G | 01p | G | 0.116071429 | 0.130630631  | 0.630203 |
| rs6427384  | FCRL5          | C/T | 01q | C | 0.142857143 | 0.126126126  | 0.630265 |
| rs10742787 | OR52N1         | C/T | 11p | T | 0.304545455 | 0.283018868  | 0.630917 |
| rs2357489  |                | A/C | 02p | A | 0.334821429 | 0.355855856  | 0.63112  |
| rs2548612  | SNAG1          | G/T | 05q | T | 0.433035714 | 0.455357143  | 0.631188 |
| rs5745325  | MSH4           | A/G | 01p | A | 0.267857143 | 0.247747748  | 0.631268 |

|            |          |     |     |   |             |             |          |
|------------|----------|-----|-----|---|-------------|-------------|----------|
| rs6926570  | ENPP5    | C/T | 06p | T | 0.428571429 | 0.450892857 | 0.631855 |
| rs2278008  | AMACR    | C/T | 05p | C | 0.263888889 | 0.243119266 | 0.631893 |
| rs2111119  | RPGRIP1L | C/T | 16q | T | 0.107142857 | 0.09375     | 0.63233  |
| rs7948009  | OR52N1   | A/G | 11p | G | 0.316513762 | 0.339622642 | 0.632403 |
| rs1059779  | ABHD11   | A/G | 07q | G | 0.265765766 | 0.245454546 | 0.632654 |
| rs2072495  | EBF1     | A/G | 05q | A | 0.40625     | 0.428571429 | 0.632778 |
| rs7260180  | CEACAM20 | C/T | 19q | C | 0.415178571 | 0.4375      | 0.632834 |
| rs3752895  | COL4A4   | A/G | 02q | G | 0.46875     | 0.445945946 | 0.632967 |
| rs1132979  | EIF2A    | C/G | 03q | G | 0.391089109 | 0.368686869 | 0.63305  |
| rs930137   | UNQ5830  | C/T | 02p | C | 0.370535714 | 0.348214286 | 0.633068 |
| rs11229898 |          | C/T | 11q | T | 0.397321429 | 0.418918919 | 0.633138 |
| rs2736569  |          | G/T | 11p | G | 0.13963964  | 0.15625     | 0.633223 |
| rs3760779  |          | A/G | 19p | A | 0.098214286 | 0.111607143 | 0.633486 |
| rs7258368  | ZNF625   | C/T | 19p | T | 0.098214286 | 0.111607143 | 0.633486 |
| rs7674726  |          | C/G | 04p | C | 0.054054054 | 0.045454545 | 0.633558 |
| rs6704505  | TDRD5    | A/G | 01q | G | 0.098214286 | 0.084821429 | 0.633671 |
| rs8104843  | OR111    | C/G | 19p | C | 0.107142857 | 0.121621622 | 0.63385  |
| rs2272722  | DERL1    | C/T | 08q | C | 0.102678571 | 0.089285714 | 0.634069 |
| rs1539302  |          | A/G | 16q | G | 0.334821429 | 0.31981982  | 0.634221 |
| rs3796529  | REST     | A/G | 04q | A | 0.189189189 | 0.208333333 | 0.634536 |
| rs10798333 | TNN      | C/T | 01q | T | 0.392857143 | 0.414414414 | 0.634647 |
| rs9369265  | TREML4   | C/T | 06p | T | 0.175675676 | 0.193693694 | 0.635215 |
| rs703143   |          | A/G | 01q | A | 0.366071429 | 0.388392857 | 0.635247 |
| rs2842899  | TAAR9    | A/T | 06q | A | 0.299107143 | 0.279279279 | 0.635472 |
| rs9309107  | DYNC2LI1 | A/T | 02p | A | 0.3125      | 0.333333333 | 0.635486 |
| rs2293180  | KSR1     | C/T | 17p | T | 0.143518519 | 0.127272727 | 0.635509 |
| rs6458687  | MUT      | C/T | 06p | T | 0.370535714 | 0.348214286 | 0.635542 |
| rs2074418  | ZP1      | C/T | 11q | T | 0.40625     | 0.383928571 | 0.635611 |
| rs9835332  | C3orf63  | C/G | 03p | C | 0.477678571 | 0.454954955 | 0.63585  |
| rs3802711  | CDH23    | C/T | 10q | T | 0.151785714 | 0.169642857 | 0.635917 |
| rs5759611  | RAB36    | A/G | 22q | A | 0.268181818 | 0.286363636 | 0.635954 |
| rs4870723  | COL14A1  | A/C | 08q | C | 0.477477477 | 0.5         | 0.636028 |
| rs1394366  |          | C/G | 21q | G | 0.169642857 | 0.153153153 | 0.636089 |
| rs1049296  | TF       | C/T | 03q | T | 0.153153153 | 0.169642857 | 0.636251 |
| rs7624750  | OPA1     | A/G | 03q | A | 0.46875     | 0.446428571 | 0.636391 |
| rs2366777  | GPR98    | G/T | 05q | G | 0.364864865 | 0.342342342 | 0.636511 |
| rs3811635  | MERTK    | A/G | 02q | A | 0.376146789 | 0.4         | 0.63667  |



|            |                     |     |     |   |             |             |          |
|------------|---------------------|-----|-----|---|-------------|-------------|----------|
| rs1950943  |                     | G/T | 14q | T | 0.238738739 | 0.21875     | 0.636837 |
| rs2961665  |                     | C/G | 05q | G | 0.087962963 | 0.072727273 | 0.636902 |
| rs3825549  | MIA2                | A/G | 14q | G | 0.086363636 | 0.099099099 | 0.637022 |
| rs314344   | ZAN                 | C/G | 07q | G | 0.428571429 | 0.40625     | 0.637179 |
| rs365745   | ZNF221              | A/T | 19q | T | 0.136363636 | 0.151785714 | 0.637737 |
| rs904840   |                     | A/G | 15q | A | 0.289719626 | 0.305555556 | 0.637807 |
| rs4259911  |                     | G/T | 13q | T | 0.424107143 | 0.446428571 | 0.637812 |
| rs2014827  | ZNF17               | A/C | 19q | A | 0.205357143 | 0.188073394 | 0.637826 |
| rs4936919  | OR8D1               | A/G | 11q | G | 0.410714286 | 0.388392857 | 0.637947 |
| rs10500382 | LOC92017            | C/G | 16p | G | 0.285714286 | 0.306306306 | 0.638143 |
| rs2512167  | OR8G5               | C/T | 11q | C | 0.401785714 | 0.423423423 | 0.638148 |
| rs1897820  | ZNF180              | C/G | 19q | C | 0.4375      | 0.415178571 | 0.638399 |
| rs7100382  | C10orf112           | A/C | 10p | A | 0.396396396 | 0.415178571 | 0.638407 |
| rs3809529  | MYO1E, LDHAL6B      | A/G | 15q | A | 0.298165138 | 0.320388349 | 0.638456 |
| rs2544600  | ZFYVE16             | C/T | 05q | T | 0.094594595 | 0.105504587 | 0.638567 |
| rs1054515  | CCDC70              | A/G | 13q | G | 0.341346154 | 0.321100917 | 0.638795 |
| rs2044693  | PNO1, WDR92         | C/T | 02p | T | 0.352678571 | 0.330357143 | 0.638875 |
| rs2920217  | ZNF509              | G/T | 04p | G | 0.321428571 | 0.301801802 | 0.638879 |
| rs2006771  | SFI1                | C/T | 22q | T | 0.454954955 | 0.477678571 | 0.638913 |
| rs7508059  | LOC400682           | A/G | 19p | A | 0.205357143 | 0.1875      | 0.639061 |
| rs8139422  | CRELD2              | A/C | 22q | A | 0.054054054 | 0.044642857 | 0.639452 |
| rs6683071  | FLJ43505            | A/G | 01q | A | 0.209821429 | 0.191964286 | 0.639657 |
| rs7138580  | hCG_26523           | C/G | 12q | C | 0.36036036  | 0.339285714 | 0.639846 |
| rs6961822  | LOC136143, tcag7.23 | A/G | 07q | A | 0.256756757 | 0.238738739 | 0.639993 |
| rs10887063 | TACC2               | C/T | 10q | T | 0.186363636 | 0.169642857 | 0.640123 |
| rs7483     | GSTM3               | A/G | 01p | A | 0.321428571 | 0.301801802 | 0.640157 |
| rs10888256 | OR11L1              | C/T | 01q | C | 0.102678571 | 0.116071429 | 0.640606 |
| rs4607924  | OR11L1              | C/G | 01q | G | 0.102678571 | 0.116071429 | 0.640606 |
| rs9691053  |                     | A/G | 07p | G | 0.205607477 | 0.222727273 | 0.640628 |
| rs2269970  | COG5                | A/G | 07q | G | 0.481981982 | 0.495535714 | 0.640749 |
| rs3738954  | FAM124B             | C/T | 02q | C | 0.154545454 | 0.139423077 | 0.640792 |
| rs12446781 |                     | C/G | 16q | G | 0.378640777 | 0.4         | 0.640853 |
| rs2442426  | OR51A4, OR51A2      | C/T | 11p | C | 0.210784314 | 0.225961538 | 0.640968 |
| rs7201448  |                     | C/T | 16p | T | 0.171171171 | 0.189189189 | 0.641561 |
| rs2293869  | RP1                 | A/T | 08q | T | 0.427927928 | 0.450892857 | 0.641604 |
| rs746220   | PRDM6               | C/G | 05q | G | 0.383928571 | 0.363636364 | 0.641914 |
| rs857685   | OR10Z1              | A/C | 01q | C | 0.301801802 | 0.28125     | 0.642093 |

|            |                      |     |     |   |             |             |          |
|------------|----------------------|-----|-----|---|-------------|-------------|----------|
| rs539445   | ZAN                  | C/G | 07q | G | 0.370535714 | 0.392857143 | 0.642247 |
| rs2024301  | CLEC4A               | A/T | 12p | T | 0.328828829 | 0.348214286 | 0.642368 |
| rs10943299 | IMPG1                | A/G | 06q | A | 0.151785714 | 0.138392857 | 0.642998 |
| rs11101964 |                      | A/G | 01p | A | 0.227272727 | 0.209821429 | 0.643103 |
| rs5174     | LRP8                 | A/G | 01p | A | 0.414414414 | 0.4375      | 0.643503 |
| rs10985765 | GABBR2               | C/T | 09q | C | 0.183035714 | 0.168181818 | 0.643563 |
| rs2297019  | MEP1A                | C/T | 06p | C | 0.267857143 | 0.247747748 | 0.643853 |
| rs6604731  |                      | C/T | 01q | T | 0.330357143 | 0.3125      | 0.643895 |
| rs2228561  | COL7A1               | C/T | 03p | T | 0.126126126 | 0.111607143 | 0.643925 |
| rs10202624 | EML4                 | A/G | 02p | A | 0.1         | 0.116071429 | 0.644152 |
| rs1130499  | PTPRN2               | A/G | 07q | A | 0.292792793 | 0.3125      | 0.644163 |
| rs8923     | MTHFS                | A/G | 15q | G | 0.107142857 | 0.09375     | 0.644285 |
| rs1055246  | BCAS1                | C/T | 20q | C | 0.125       | 0.13963964  | 0.644819 |
| rs479499   | CLEC12A              | A/C | 12p | A | 0.368181818 | 0.351351351 | 0.644987 |
| rs2651079  | ZNF792               | A/G | 19q | A | 0.495535714 | 0.482142857 | 0.645216 |
| rs9576175  | CSNK1A1L             | G/T | 13q | T | 0.482142857 | 0.459821429 | 0.645507 |
| rs6597892  |                      | A/G | 11p | A | 0.18018018  | 0.165178571 | 0.645523 |
| rs11545619 | ZNF83                | A/G | 19q | G | 0.107142857 | 0.09375     | 0.645624 |
| rs17615    | CR2                  | A/G | 01q | A | 0.303571429 | 0.325892857 | 0.646139 |
| rs6722745  | SULT1C3              | C/T | 02q | C | 0.258928571 | 0.279279279 | 0.646236 |
| rs3761472  | SAMM50               | A/G | 22q | G | 0.159090909 | 0.144144144 | 0.646238 |
| rs2512219  | OR8D2                | A/G | 11q | A | 0.120535714 | 0.133928571 | 0.646298 |
| rs444527   | CDC20B               | C/T | 05q | T | 0.205357143 | 0.223214286 | 0.646581 |
| rs8192917  | GZMB                 | A/G | 14q | G | 0.254464286 | 0.236607143 | 0.646701 |
| rs11699009 | C20orf186            | C/T | 20q | T | 0.428571429 | 0.405       | 0.64678  |
| rs1128750  | PFDN2, KLHDC9        | A/G | 01q | A | 0.059090909 | 0.049107143 | 0.646783 |
| rs240812   | LOC387826            | C/G | 12p | G | 0.147321429 | 0.162162162 | 0.646784 |
| rs10927851 | FBLIM1               | C/T | 01p | C | 0.299107143 | 0.321428571 | 0.646954 |
| rs9324624  | FLJ41603             | C/T | 05q | C | 0.491071429 | 0.486607143 | 0.646965 |
| rs2248852  | RSU1                 | C/G | 10p | C | 0.094594595 | 0.107142857 | 0.647144 |
| rs2907308  |                      | C/T | 05q | T | 0.174107143 | 0.157657658 | 0.64728  |
| rs544198   |                      | G/T | 17q | G | 0.214285714 | 0.196428571 | 0.647305 |
| rs314044   |                      | A/T | 04q | A | 0.133928571 | 0.151785714 | 0.647475 |
| rs957795   | LOC728076, LOC732309 | C/T | 21q | T | 0.116071429 | 0.102678571 | 0.647758 |
| rs2230912  | P2RX7                | A/G | 12q | G | 0.174107143 | 0.191964286 | 0.647764 |
| rs9323694  | C14orf145            | C/G | 14q | G | 0.445454546 | 0.422727273 | 0.647869 |
| rs727162   | NPSR1, AAA1          | C/G | 07p | C | 0.205357143 | 0.1875      | 0.64807  |

|            |               |     |     |   |             |             |          |
|------------|---------------|-----|-----|---|-------------|-------------|----------|
| rs2075520  | ZP2           | A/C | 16p | A | 0.297297297 | 0.277272727 | 0.648355 |
| rs10417163 | ZNF28, ZNF320 | G/T | 19q | T | 0.397321429 | 0.419642857 | 0.648428 |
| rs3760454  | UTP6          | A/G | 17q | G | 0.450892857 | 0.472972973 | 0.648639 |
| rs2016126  | TMEM104       | C/T | 17q | C | 0.357142857 | 0.379464286 | 0.648658 |
| rs4956145  | HADH          | C/T | 04q | T | 0.102678571 | 0.089285714 | 0.64872  |
| rs3900940  | MYH15         | C/T | 03q | C | 0.303571429 | 0.285714286 | 0.648801 |
| rs2235718  |               | C/T | 06p | T | 0.085585586 | 0.099099099 | 0.648856 |
| rs9925415  | PKD1L3        | C/T | 16q | C | 0.477678571 | 0.455357143 | 0.648891 |
| rs2075773  | ANGEL1        | A/C | 14q | C | 0.120535714 | 0.108108108 | 0.649006 |
| rs11239910 |               | C/T | 01q | C | 0.111607143 | 0.125       | 0.649076 |
| rs3087403  | REV1          | A/G | 02q | A | 0.323809524 | 0.344339623 | 0.649288 |
| rs10414166 | PSG11         | C/T | 19q | T | 0.318181818 | 0.298076923 | 0.649536 |
| rs3740370  | CEP55         | C/G | 10q | C | 0.183035714 | 0.200892857 | 0.649603 |
| rs9473558  | MUT           | C/T | 06p | T | 0.349514563 | 0.37037037  | 0.650004 |
| rs11041108 | ZNF215        | A/G | 11p | G | 0.388392857 | 0.410714286 | 0.650038 |
| rs573455   | CEP164        | C/T | 11q | T | 0.450892857 | 0.472972973 | 0.650226 |
| rs2297680  | COL16A1       | G/T | 01p | T | 0.116071429 | 0.102678571 | 0.650386 |
| rs7386783  | OC90          | C/T | 08q | T | 0.334821429 | 0.316964286 | 0.650548 |
| rs2066704  | ATP10A        | A/G | 15q | A | 0.103603604 | 0.090909091 | 0.651018 |
| rs1053419  | C14orf2       | A/G | 14q | G | 0.072072072 | 0.0625      | 0.651097 |
| rs1165222  | USP24         | C/T | 01p | C | 0.125       | 0.111607143 | 0.651252 |
| rs3885619  |               | C/T | 07q | C | 0.223214286 | 0.209821429 | 0.651286 |
| rs10931200 |               | A/C | 02q | C | 0.433035714 | 0.455357143 | 0.65151  |
| rs11695215 |               | A/G | 02q | A | 0.433035714 | 0.455357143 | 0.65151  |
| rs1862066  | FLJ44048      | C/T | 02q | C | 0.433035714 | 0.455357143 | 0.65151  |
| rs2161036  |               | A/C | 02q | C | 0.433035714 | 0.455357143 | 0.65151  |
| rs7605884  |               | C/T | 02q | T | 0.433035714 | 0.455357143 | 0.65151  |
| rs2289629  | SSH2          | C/T | 17q | T | 0.321428571 | 0.342342342 | 0.651511 |
| rs2253427  | SIRPB1        | C/T | 20p | T | 0.205357143 | 0.223214286 | 0.65183  |
| rs1798192  | GPR109B       | A/C | 12q | A | 0.417431193 | 0.435779816 | 0.652028 |
| rs7191155  | IQCK          | C/T | 16p | C | 0.159090909 | 0.144144144 | 0.652682 |
| rs9909703  |               | C/G | 17q | G | 0.058558559 | 0.049107143 | 0.652684 |
| rs2272843  | MOV10L1       | A/C | 22q | A | 0.138392857 | 0.125       | 0.653014 |
| rs11596790 |               | A/G | 10q | A | 0.354545454 | 0.376146789 | 0.653096 |
| rs1133327  | ZNF415        | A/G | 19q | A | 0.490990991 | 0.486238532 | 0.653122 |
| rs6941625  | WDR27         | A/T | 06q | A | 0.306306306 | 0.285714286 | 0.653428 |
| rs1849733  | SLFN12        | A/C | 17q | C | 0.463963964 | 0.485981308 | 0.65382  |

|            |                   |     |     |   |             |             |          |
|------------|-------------------|-----|-----|---|-------------|-------------|----------|
| rs1567047  | FAT4              | C/T | 04q | T | 0.3         | 0.28125     | 0.653836 |
| rs8065903  | SPATA20           | A/G | 17q | A | 0.245535714 | 0.227678571 | 0.654065 |
| rs6738031  | SCN7A             | A/C | 02q | C | 0.286363636 | 0.304545455 | 0.654073 |
| rs11567868 |                   | A/G | 07q | G | 0.3125      | 0.292792793 | 0.654185 |
| rs10490391 |                   | C/T | 02q | C | 0.433035714 | 0.454954955 | 0.654651 |
| rs7689099  | NEIL3             | C/G | 04q | G | 0.15625     | 0.142857143 | 0.654723 |
| rs10813831 | DDX58             | A/G | 09p | A | 0.252252252 | 0.272321429 | 0.654997 |
| rs10841795 | SLCO1A2           | A/G | 12p | G | 0.133928571 | 0.120535714 | 0.655106 |
| rs8176785  | NELL1             | A/G | 11p | G | 0.267857143 | 0.25        | 0.655488 |
| rs138951   | TTLL12            | A/G | 22q | A | 0.098214286 | 0.111607143 | 0.655551 |
| rs3752095  | DSG1              | A/T | 18q | T | 0.153153153 | 0.137614679 | 0.655912 |
| rs1128397  | GFRA2             | A/T | 08p | A | 0.410714286 | 0.432432432 | 0.656063 |
| rs8083485  |                   | A/G | 18q | A | 0.180555556 | 0.195454545 | 0.656192 |
| rs1150258  | IL24              | A/G | 01q | G | 0.436936937 | 0.459821429 | 0.656196 |
| rs626578   | CNTN3             | C/T | 03p | C | 0.080952381 | 0.070754717 | 0.656393 |
| rs4060726  | DNHD2             | A/G | 03p | G | 0.379464286 | 0.361607143 | 0.656467 |
| rs7386782  | OC90              | C/T | 08q | T | 0.333333333 | 0.315315315 | 0.656681 |
| rs937057   | GPR110            | C/T | 06p | C | 0.231818182 | 0.24537037  | 0.65691  |
| rs202507   |                   | C/T | 20p | C | 0.449541284 | 0.427272727 | 0.656929 |
| rs1024323  | GRK4              | A/G | 04p | A | 0.390909091 | 0.369369369 | 0.656969 |
| rs8110220  | HSD17B14, PLEKHA4 | C/T | 19q | C | 0.263636364 | 0.28125     | 0.657245 |
| rs2300455  | ACACB             | C/T | 12q | T | 0.21875     | 0.200892857 | 0.657285 |
| rs2236493  | RAGE              | C/T | 14q | C | 0.227678571 | 0.245535714 | 0.657656 |
| rs865093   | FLJ40243          | A/G | 05p | A | 0.12962963  | 0.146226415 | 0.657863 |
| rs2278842  | PKD2L1            | A/G | 10q | A | 0.112612613 | 0.126126126 | 0.657953 |
| rs917340   | ZNF264            | A/G | 19q | G | 0.398148148 | 0.418269231 | 0.658055 |
| rs7283589  | LOC732226         | C/T | 21q | C | 0.232142857 | 0.25        | 0.658163 |
| rs4944960  | XRR1              | C/G | 11q | C | 0.25        | 0.267857143 | 0.658188 |
| rs1968090  | ZNF543            | A/T | 19q | T | 0.261261261 | 0.245535714 | 0.658926 |
| rs1541185  | RNF186            | C/T | 01p | T | 0.214285714 | 0.232142857 | 0.659038 |
| rs2270182  | NRAP              | A/T | 10q | T | 0.254807692 | 0.270408163 | 0.659099 |
| rs12256835 | C10orf112         | G/T | 10p | G | 0.200892857 | 0.183035714 | 0.659193 |
| rs3894129  | WDR87             | C/G | 19q | C | 0.252293578 | 0.270642202 | 0.659693 |
| rs1867502  |                   | A/C | 03q | A | 0.445945946 | 0.427272727 | 0.659746 |
| rs6438877  |                   | A/G | 03q | A | 0.482142857 | 0.495495495 | 0.659935 |

|            |                                                                                      |     |     |   |             |             |          |  |
|------------|--------------------------------------------------------------------------------------|-----|-----|---|-------------|-------------|----------|--|
|            | LOC729788, LOC729792,<br>LOC730400, LOC730401,<br>LOC730408, LOC730409,<br>LOC732021 |     |     |   |             |             |          |  |
| rs4713420  |                                                                                      | G/T | 06p | T | 0.166666667 | 0.183035714 | 0.660115 |  |
| rs4463136  |                                                                                      | C/T | 04q | T | 0.245535714 | 0.263392857 | 0.660216 |  |
| rs10264967 | STK31                                                                                | G/T | 07p | T | 0.166666667 | 0.151376147 | 0.660903 |  |
| rs935707   |                                                                                      | A/G | 19q | G | 0.476851852 | 0.5         | 0.660999 |  |
| rs10424191 |                                                                                      | A/G | 19q | G | 0.364864865 | 0.34375     | 0.661383 |  |
| rs2273328  |                                                                                      | A/T | 20p | A | 0.066037736 | 0.077981651 | 0.661388 |  |
| rs10942252 |                                                                                      | A/G | 05p | A | 0.36036036  | 0.379464286 | 0.661401 |  |
| rs11171277 |                                                                                      | A/G | 12q | G | 0.063636364 | 0.077981651 | 0.661549 |  |
| rs885276   | CYP27C1                                                                              | A/T | 02q | T | 0.418918919 | 0.4375      | 0.661783 |  |
| rs6669481  | SLC26A9                                                                              | C/T | 01q | C | 0.125       | 0.138392857 | 0.66188  |  |
| rs10405154 | FLJ32658                                                                             | A/G | 19q | G | 0.486486487 | 0.46875     | 0.661908 |  |
| rs1671150  | GP6                                                                                  | A/G | 19q | A | 0.177272727 | 0.193693694 | 0.662012 |  |
| rs252579   | EMR4                                                                                 | C/T | 19p | T | 0.211711712 | 0.227678571 | 0.66245  |  |
| rs7930185  | LUZP2                                                                                | C/G | 11p | C | 0.379464286 | 0.400900901 | 0.662659 |  |
| rs10887621 | WAPAL                                                                                | C/T | 10q | T | 0.286363636 | 0.303571429 | 0.662762 |  |
| rs14212    | MPZL1                                                                                | A/G | 01q | G | 0.126126126 | 0.13963964  | 0.662836 |  |
| rs2271637  | STAB2                                                                                | C/G | 12q | C | 0.28125     | 0.3         | 0.662869 |  |
| rs4075256  | AKAP13                                                                               | A/G | 15q | A | 0.354368932 | 0.33        | 0.662907 |  |
| rs7124407  | C11orf52                                                                             | C/G | 11q | G | 0.357142857 | 0.375       | 0.662935 |  |
| rs1673407  | PKHD1L1                                                                              | A/C | 08q | A | 0.480952381 | 0.495412844 | 0.663043 |  |
| rs11065500 |                                                                                      | A/G | 12q | G | 0.107142857 | 0.09375     | 0.663183 |  |
| rs237596   | LOC729549                                                                            | C/G | 10p | C | 0.31981982  | 0.302752294 | 0.663268 |  |
| rs4668123  | LRP2                                                                                 | C/T | 02q | T | 0.258928571 | 0.240909091 | 0.66333  |  |
| rs10888255 | OR11L1                                                                               | C/G | 01q | C | 0.103603604 | 0.116071429 | 0.663523 |  |
| rs4823086  | TBC1D10A                                                                             | C/T | 22q | T | 0.111607143 | 0.125       | 0.663549 |  |
| rs202510   |                                                                                      | A/G | 20p | A | 0.428571429 | 0.40625     | 0.663868 |  |
| rs1571070  |                                                                                      | A/G | 13q | A | 0.34375     | 0.364864865 | 0.663977 |  |
| rs1801105  |                                                                                      | C/T | 02q | T | 0.094594595 | 0.105504587 | 0.664166 |  |
| rs4833095  | TLR1                                                                                 | C/T | 04p | C | 0.290178571 | 0.272321429 | 0.664243 |  |
| rs3796139  |                                                                                      | A/G | 03q | G | 0.133928571 | 0.147321429 | 0.664779 |  |
| rs11265165 | OR10J3                                                                               | C/T | 01q | C | 0.066964286 | 0.077272727 | 0.664974 |  |
| rs2140516  | SLC13A1                                                                              | C/T | 07q | C | 0.308035714 | 0.325892857 | 0.66504  |  |
| rs751019   | PTK2B                                                                                | A/C | 08p | C | 0.477678571 | 0.5         | 0.665169 |  |
| rs527028   |                                                                                      | C/T | 02q | T | 0.418918919 | 0.440909091 | 0.665206 |  |

|            |                  |     |     |   |             |             |          |
|------------|------------------|-----|-----|---|-------------|-------------|----------|
| rs10829163 | ANKRD26          | C/T | 10p | T | 0.15625     | 0.171171171 | 0.665256 |
| rs6820230  | SLC2A9           | C/T | 04p | T | 0.236607143 | 0.254464286 | 0.665357 |
| rs212989   | SLC5A9           | A/G | 01p | A | 0.205357143 | 0.189189189 | 0.665438 |
| rs935706   |                  | A/G | 19q | G | 0.472972973 | 0.495535714 | 0.66559  |
| rs10186922 |                  | A/G | 02q | A | 0.183035714 | 0.196428571 | 0.665842 |
| rs2303291  | ITSN2            | C/T | 02p | T | 0.267857143 | 0.285714286 | 0.665971 |
| rs2155853  | hCG_1643692      | A/G | 18q | G | 0.36036036  | 0.380733945 | 0.666091 |
| rs4910844  | OR52N4           | A/T | 11p | T | 0.236111111 | 0.21875     | 0.666151 |
| rs2070215  | MCM7             | A/G | 07q | G | 0.276785714 | 0.258928571 | 0.666674 |
| rs2910327  | PCDHB12          | C/T | 05q | T | 0.148648649 | 0.133928571 | 0.666786 |
| rs10100659 | TGS1             | C/T | 08q | C | 0.108108108 | 0.120535714 | 0.667032 |
| rs366111   | ZNF221           | A/G | 19q | G | 0.102678571 | 0.116071429 | 0.667057 |
| rs1126497  | TACSTD1          | C/T | 02p | C | 0.444444444 | 0.425233645 | 0.667291 |
| rs2270565  | UCP1             | A/T | 04q | A | 0.067567568 | 0.058035714 | 0.667323 |
| rs4782865  | OSGIN1           | C/T | 16q | C | 0.40625     | 0.427272727 | 0.667341 |
| rs5030087  | KNG1             | C/G | 03q | C | 0.053571429 | 0.044642857 | 0.667362 |
| rs3764556  | MUC16            | G/T | 19p | T | 0.292792793 | 0.274774775 | 0.667395 |
| rs6934690  | C6orf142         | A/T | 06p | T | 0.074766355 | 0.06372549  | 0.66746  |
| rs6573560  | C14orf50         | C/T | 14q | T | 0.476851852 | 0.457142857 | 0.66792  |
| rs678      | ITIH1            | A/T | 03p | T | 0.405405405 | 0.383928571 | 0.668066 |
| rs9328764  | POLN             | A/G | 04p | A | 0.098214286 | 0.111607143 | 0.668184 |
| rs2888099  | RBMS3            | A/C | 03p | C | 0.157657658 | 0.142857143 | 0.668329 |
| rs4296316  |                  | A/G | 17q | A | 0.276785714 | 0.294642857 | 0.668477 |
| rs11204978 | FLG              | G/T | 01q | T | 0.147321429 | 0.135135135 | 0.668525 |
| rs7176429  | NTRK3            | G/T | 15q | T | 0.308035714 | 0.325892857 | 0.66864  |
| rs906807   | NDUFV2           | A/G | 18p | A | 0.18018018  | 0.165178571 | 0.669289 |
| rs3742769  |                  | C/T | 14q | T | 0.190909091 | 0.175675676 | 0.669303 |
| rs1051738  | PDE4A            | A/C | 19p | A | 0.166666667 | 0.183035714 | 0.66942  |
| rs6438805  | MYLK             | C/G | 03q | G | 0.15625     | 0.142201835 | 0.669441 |
| rs6658555  | ST7L             | C/T | 01p | T | 0.272321429 | 0.254464286 | 0.669446 |
| rs9937453  |                  | A/G | 16p | G | 0.174107143 | 0.189189189 | 0.669755 |
| rs2467402  |                  | G/T | 15q | T | 0.120535714 | 0.107142857 | 0.669845 |
| rs745191   | AKAP13           | G/T | 15q | T | 0.297297297 | 0.315315315 | 0.670001 |
| rs10221698 | FLJ39061         | C/T | 02q | T | 0.433035714 | 0.454954955 | 0.670402 |
| rs262688   | PRKCZ            | A/C | 01p | C | 0.285714286 | 0.303571429 | 0.670527 |
| rs7863265  | STRBP, LOC729586 | C/G | 09q | C | 0.344036697 | 0.324324324 | 0.67068  |
| rs949882   | FLJ37396         | A/G | 06q | A | 0.330357143 | 0.346846847 | 0.670699 |

|            |                      |     |     |   |             |             |          |
|------------|----------------------|-----|-----|---|-------------|-------------|----------|
| rs2301620  | DNAH3                | A/G | 16p | A | 0.058035714 | 0.067567568 | 0.670757 |
| rs7118113  | OR51B4               | C/T | 11p | C | 0.304545454 | 0.324324324 | 0.6712   |
| rs11221912 | PRDM10               | C/T | 11q | T | 0.053571429 | 0.044642857 | 0.671507 |
| rs2466620  | OR8D2                | A/G | 11q | A | 0.121621622 | 0.133928571 | 0.671779 |
| rs2618962  |                      | A/G | 04p | A | 0.40990991  | 0.385321101 | 0.671826 |
| rs963401   | USH1C                | A/G | 11p | A | 0.339449541 | 0.359090909 | 0.671843 |
| rs4616798  | MLF1IP               | C/T | 04q | C | 0.178571429 | 0.191964286 | 0.672012 |
| rs6552804  | MLF1IP               | A/G | 04q | G | 0.178571429 | 0.191964286 | 0.672012 |
| rs4320729  | MYOM3                | C/T | 01p | T | 0.424107143 | 0.401785714 | 0.672297 |
| rs1670534  | RNF212               | A/G | 04p | A | 0.227678571 | 0.245535714 | 0.672485 |
| rs7006     | FBXW4, RP11-529I10.4 | A/G | 10q | G | 0.276785714 | 0.258928571 | 0.672499 |
| rs3748428  | FAM38B               | A/G | 18p | A | 0.142857143 | 0.129464286 | 0.672502 |
| rs2275155  | SDCCAG8              | A/T | 01q | A | 0.330357143 | 0.348214286 | 0.672711 |
| rs2298624  | MYO5B                | C/T | 18q | T | 0.129464286 | 0.116071429 | 0.672902 |
| rs7722926  | MGC23985             | A/T | 05q | T | 0.090476191 | 0.102803738 | 0.672924 |
| rs2275831  | KIAA0562             | C/T | 01p | T | 0.053571429 | 0.044642857 | 0.672943 |
| rs10797347 | KIAA0562             | A/G | 01p | A | 0.053571429 | 0.044642857 | 0.672943 |
| rs1147990  | TTC4                 | A/T | 01p | A | 0.490654206 | 0.490740741 | 0.673296 |
| rs4287691  |                      | A/C | 19q | A | 0.320754717 | 0.301980198 | 0.673526 |
| rs3749523  | ZNF141               | G/T | 04p | T | 0.116071429 | 0.129464286 | 0.673587 |
| rs1802491  | PRPF8                | C/T | 17p | C | 0.058035714 | 0.066964286 | 0.673825 |
| rs6909271  |                      | A/T | 06p | A | 0.15625     | 0.171171171 | 0.673852 |
| rs2301796  | MAN2B2               | G/T | 04p | G | 0.459090909 | 0.440366972 | 0.674111 |
| rs7158731  |                      | C/T | 14q | C | 0.209821429 | 0.193693694 | 0.674276 |
| rs1345748  |                      | A/G | 19q | G | 0.472972973 | 0.495535714 | 0.674364 |
| rs11016076 | MKI67                | C/G | 10q | G | 0.171171171 | 0.183962264 | 0.674688 |
| rs2254358  | HSPG2                | A/C | 01p | C | 0.3125      | 0.330357143 | 0.675024 |
| rs2288255  | BMP2K                | C/T | 04q | T | 0.050458716 | 0.041666667 | 0.675225 |
| rs2070317  | BPIL3                | A/G | 20q | G | 0.490990991 | 0.490990991 | 0.675365 |
| rs1660882  |                      | C/T | 11q | C | 0.361607143 | 0.34375     | 0.675548 |
| rs723685   | SLC22A16             | C/T | 06q | C | 0.084821429 | 0.095454545 | 0.675606 |
| rs7941190  | OR5AN1               | C/G | 11q | G | 0.361607143 | 0.379464286 | 0.675811 |
| rs3823310  | AKAP12               | G/T | 06q | T | 0.334821429 | 0.355855856 | 0.675848 |
| rs2278911  | KIAA1524             | C/T | 03q | T | 0.133928571 | 0.120535714 | 0.675849 |
| rs3816605  | NUP160               | C/T | 11p | C | 0.419047619 | 0.403846154 | 0.675882 |
| rs2819421  | AHNAK2               | A/G | 14q | A | 0.334821429 | 0.321428571 | 0.676439 |
| rs3099429  |                      | A/T | 02q | T | 0.209090909 | 0.191964286 | 0.676615 |

|            |                   |     |     |   |             |             |          |
|------------|-------------------|-----|-----|---|-------------|-------------|----------|
| rs1667364  |                   | A/C | 19q | C | 0.467592593 | 0.490825688 | 0.676627 |
| rs7666919  |                   | C/T | 04p | T | 0.321428571 | 0.339285714 | 0.677488 |
| rs10459809 | CNGB1             | G/T | 16q | T | 0.147321429 | 0.160714286 | 0.678009 |
| rs553717   | GPC5              | A/G | 13q | A | 0.098214286 | 0.085585586 | 0.678016 |
| rs2784159  |                   | A/G | 01p | A | 0.190909091 | 0.174107143 | 0.678141 |
| rs2276650  | STARD7            | C/G | 02q | C | 0.15625     | 0.142857143 | 0.67816  |
| rs2798161  |                   | G/T | 06p | T | 0.352678571 | 0.334821429 | 0.678328 |
| rs2292548  | LOC440268         | A/G | 15q | G | 0.058035714 | 0.049107143 | 0.678386 |
| rs10769716 | GVIN1             | G/T | 11p | T | 0.297297297 | 0.315315315 | 0.678479 |
| rs1929860  | CDC42BPA          | A/G | 01q | A | 0.28125     | 0.299107143 | 0.678584 |
| rs6777976  | OXNAD1            | C/T | 03p | T | 0.196428571 | 0.211711712 | 0.678762 |
| rs10118193 |                   | A/G | 09q | G | 0.370535714 | 0.351351351 | 0.678977 |
| rs2228545  | BMPR2             | A/G | 02q | A | 0.050458716 | 0.059090909 | 0.679317 |
| rs7670566  | LOC389230         | C/T | 04q | T | 0.495495496 | 0.477477478 | 0.679344 |
| rs482082   | WDR78             | A/G | 01p | G | 0.457142857 | 0.440909091 | 0.679442 |
| rs2244008  | LAMA2             | A/G | 06q | G | 0.054054054 | 0.045045045 | 0.679631 |
| rs10790610 | OR8D4             | C/T | 11q | C | 0.308035714 | 0.325892857 | 0.679937 |
| rs4465542  | AHNAK2            | C/T | 14q | T | 0.433035714 | 0.412844037 | 0.680112 |
| rs489060   |                   | C/G | 01q | C | 0.080357143 | 0.09009009  | 0.680185 |
| rs11189513 | C10orf28          | A/G | 10q | G | 0.272321429 | 0.290178571 | 0.680588 |
| rs2287622  | ABCB11            | C/T | 02q | T | 0.40625     | 0.388392857 | 0.680658 |
| rs1208     | NAT2              | A/G | 08p | G | 0.481981982 | 0.5         | 0.680761 |
| rs493430   | C17orf77          | A/C | 17q | A | 0.40860215  | 0.386904762 | 0.680869 |
| rs12377832 | PTGES2, LOC389791 | A/G | 09q | A | 0.138392857 | 0.125       | 0.680904 |
| rs1378796  | VEPH1             | A/C | 03q | C | 0.110526316 | 0.098837209 | 0.681342 |
| rs10758216 |                   | C/G | 09p | C | 0.379464286 | 0.361607143 | 0.681447 |
| rs1048755  | ATXN3             | A/G | 14q | A | 0.25        | 0.234234234 | 0.681663 |
| rs11861251 | ITGAM             | C/T | 16p | C | 0.160714286 | 0.147321429 | 0.68183  |
| rs14103    | C1orf212          | A/C | 01p | C | 0.071428571 | 0.0625      | 0.681854 |
| rs3734055  | FAT2              | C/T | 05q | C | 0.445945946 | 0.464285714 | 0.68269  |
| rs2147896  | C10orf33          | C/T | 10q | C | 0.391891892 | 0.40990991  | 0.682767 |
| rs11737724 |                   | C/G | 04q | G | 0.171171171 | 0.181818182 | 0.682943 |
| rs4883475  |                   | C/T | 12p | C | 0.431372549 | 0.413265306 | 0.682994 |
| rs4720015  | INMT              | G/T | 07p | T | 0.168367347 | 0.179347826 | 0.683004 |
| rs6591536  | OR5A1             | A/G | 11q | G | 0.370535714 | 0.388392857 | 0.683129 |
| rs9930984  | ADAMTS18          | G/T | 16q | T | 0.397321429 | 0.414414414 | 0.683428 |
| rs11633991 |                   | C/T | 15q | C | 0.160714286 | 0.174107143 | 0.683494 |



|            |                     |     |     |   |             |             |          |
|------------|---------------------|-----|-----|---|-------------|-------------|----------|
| rs11754288 | SLC17A4             | A/G | 06p | A | 0.433035714 | 0.450892857 | 0.683542 |
| rs3812594  | SEC16A              | A/G | 09q | A | 0.313636364 | 0.293577982 | 0.683559 |
| rs10490924 | ARMS2               | G/T | 10q | T | 0.224770642 | 0.209090909 | 0.683727 |
| rs3740203  | USP6NL              | A/G | 10p | A | 0.095959596 | 0.106796116 | 0.683748 |
| rs12529    | AKR1C3              | C/G | 10p | G | 0.436936937 | 0.419642857 | 0.683966 |
| rs6501868  | RNF157, LOC643159   | A/G | 17q | G | 0.410377359 | 0.387850467 | 0.684878 |
| rs211715   | LOC646425           | C/G | 01p | G | 0.414414414 | 0.397321429 | 0.684924 |
| rs2010875  | PLEKHQ1             | A/G | 15q | A | 0.15625     | 0.143518518 | 0.68508  |
| rs2289491  | SLC9A9              | C/T | 03q | C | 0.061320755 | 0.052884615 | 0.685099 |
| rs935180   |                     | A/C | 06q | A | 0.236607143 | 0.254464286 | 0.685113 |
| rs11219544 | OR8G5               | G/T | 11q | G | 0.077669903 | 0.088785047 | 0.685203 |
| rs11248317 | LOC729800           | C/T | 10q | C | 0.223214286 | 0.205357143 | 0.685255 |
| rs1029396  | ASZ1                | G/T | 07q | G | 0.080357143 | 0.090909091 | 0.68533  |
| rs879022   |                     | C/T | 02p | T | 0.058558559 | 0.05        | 0.685351 |
| rs3733694  | PCDHB8              | C/T | 05q | C | 0.175675676 | 0.160714286 | 0.685421 |
| rs10141024 | C14orf152           | A/G | 14q | G | 0.46875     | 0.490909091 | 0.685524 |
| rs7318174  |                     | A/T | 13q | T | 0.308035714 | 0.325892857 | 0.685696 |
| rs1934050  |                     | C/G | 10p | G | 0.415178571 | 0.396396396 | 0.685701 |
| rs2433724  | VSTM1               | A/G | 19q | G | 0.428571429 | 0.446428571 | 0.685981 |
| rs12459008 | ZNF816A             | A/T | 19q | T | 0.366071429 | 0.383928571 | 0.686013 |
| rs1803274  | BCHE                | A/G | 03q | A | 0.18627451  | 0.200934579 | 0.686168 |
| rs2267586  | UPK1A               | G/T | 19q | G | 0.0625      | 0.053571429 | 0.686344 |
| rs7590429  | LOC93349            | C/T | 02q | T | 0.37254902  | 0.394230769 | 0.686436 |
| rs3762271  | ASPM                | A/C | 01q | A | 0.459459459 | 0.47706422  | 0.686562 |
| rs6490642  | LOC441655           | A/G | 13q | A | 0.222727273 | 0.207207207 | 0.68675  |
| rs3739916  | TTF1                | A/G | 09q | A | 0.076576577 | 0.066964286 | 0.686908 |
| rs10823229 | CXXC6               | A/G | 10q | G | 0.441964286 | 0.424107143 | 0.687012 |
| rs1981071  | IFI44L              | A/G | 01p | A | 0.053571429 | 0.044642857 | 0.687035 |
| rs11917356 |                     | A/G | 03q | G | 0.2         | 0.214285714 | 0.687053 |
| rs9263871  | HCG27               | A/G | 06p | G | 0.359090909 | 0.339285714 | 0.687708 |
| rs1826619  |                     | G/T | 10p | T | 0.158878505 | 0.145454546 | 0.687772 |
| rs2020221  | C21orf29, KRTAP10-5 | C/T | 21q | T | 0.236607143 | 0.252252252 | 0.687784 |
| rs7796289  |                     | G/T | 07q | G | 0.058035714 | 0.05        | 0.687994 |
| rs2251660  | RDM1                | G/T | 17q | G | 0.234693878 | 0.25        | 0.688    |
| rs10951986 | GRID2IP             | A/G | 07p | A | 0.072072072 | 0.0625      | 0.688174 |
| rs2111375  |                     | A/G | 02p | A | 0.28125     | 0.297297297 | 0.688182 |
| rs2272199  | COL4A4              | A/G | 02q | A | 0.463963964 | 0.445945946 | 0.688256 |

|            |                  |     |     |   |             |             |          |
|------------|------------------|-----|-----|---|-------------|-------------|----------|
| rs138593   | RP3-474I12.5     | A/G | 22q | G | 0.303571429 | 0.285714286 | 0.688328 |
| rs892586   | TCEB3B, KATNAL2  | G/T | 18q | G | 0.463963964 | 0.482142857 | 0.688471 |
| rs4779061  | FSD2             | G/T | 15q | G | 0.09375     | 0.104545454 | 0.688638 |
| rs11770537 |                  | A/G | 07q | G | 0.386363636 | 0.366071429 | 0.68878  |
| rs1407977  | C9orf52          | A/G | 09p | A | 0.395454545 | 0.378378378 | 0.688893 |
| rs10058947 |                  | C/T | 05q | C | 0.189189189 | 0.205357143 | 0.689103 |
| rs4895943  | VNN3             | C/T | 06q | C | 0.4375      | 0.419642857 | 0.689111 |
| rs12459463 |                  | C/T | 19p | C | 0.245535714 | 0.227678571 | 0.68933  |
| rs3812908  | SCAPER           | C/T | 15q | C | 0.299065421 | 0.280952381 | 0.689343 |
| rs7300780  | MUC19, LOC730512 | A/G | 12q | A | 0.297297297 | 0.316964286 | 0.68942  |
| rs735473   | LOC400958        | C/T | 02p | T | 0.107142857 | 0.120535714 | 0.6896   |
| rs1468270  | NFE2L1           | C/T | 17q | T | 0.200892857 | 0.21875     | 0.689668 |
| rs2344900  | FLJ36144         | C/T | 15q | T | 0.151785714 | 0.165178571 | 0.689902 |
| rs2908004  | WNT16            | C/T | 07q | T | 0.4375      | 0.455357143 | 0.68992  |
| rs7330715  |                  | A/T | 13q | A | 0.304545454 | 0.322727273 | 0.690284 |
| rs4328074  |                  | A/G | 01q | A | 0.301801802 | 0.321428571 | 0.69038  |
| rs2273959  | SDCBP2           | C/T | 20p | T | 0.481981982 | 0.5         | 0.690476 |
| rs2280432  |                  | C/T | 15q | T | 0.232142857 | 0.247747748 | 0.690482 |
| rs2073724  | TCF19            | C/T | 06p | T | 0.080357143 | 0.09009009  | 0.6905   |
| rs1047740  | KDELC1           | A/G | 13q | G | 0.258928571 | 0.245535714 | 0.690719 |
| rs1047855  | ENTPD3           | C/T | 03p | T | 0.310810811 | 0.294642857 | 0.690775 |
| rs778294   | DAOA             | A/G | 13q | A | 0.258928571 | 0.276785714 | 0.69082  |
| rs1976165  | SEZ6             | C/T | 17q | C | 0.285714286 | 0.303571429 | 0.691199 |
| rs11587021 | VSIG8            | C/T | 01q | T | 0.450450451 | 0.433035714 | 0.691289 |
| rs1799950  | BRCA1            | A/G | 17q | G | 0.072072072 | 0.081081081 | 0.69139  |
| rs7572857  | CEP68            | A/G | 02p | A | 0.168181818 | 0.183486238 | 0.691466 |
| rs4961     | ADD1             | G/T | 04p | T | 0.168181818 | 0.183035714 | 0.691899 |
| rs1051931  | PLA2G7           | A/G | 06p | A | 0.196428571 | 0.211711712 | 0.691945 |
| rs11694988 | TTC30B           | C/T | 02q | C | 0.138392857 | 0.125       | 0.692008 |
| rs4968839  | ABCA6            | C/T | 17q | C | 0.31981982  | 0.339285714 | 0.692165 |
| rs10857535 | C10orf53         | A/G | 10q | A | 0.477678571 | 0.495535714 | 0.692177 |
| rs2302334  | EIF2AK1          | A/T | 07p | A | 0.440366972 | 0.459821429 | 0.692248 |
| rs132700   | APOL4            | C/T | 22q | C | 0.325892857 | 0.306306306 | 0.692277 |
| rs15772    | NMT2, RPP38      | C/G | 10p | G | 0.196428571 | 0.211711712 | 0.692457 |
| rs2997211  | MPP7             | C/T | 10p | T | 0.125       | 0.111607143 | 0.692537 |
| rs2908784  |                  | A/G | 16q | A | 0.34375     | 0.325892857 | 0.692543 |
| rs1395267  | SERPINB11        | C/T | 18q | T | 0.294642857 | 0.279279279 | 0.692677 |

|            |           |     |     |   |             |             |          |
|------------|-----------|-----|-----|---|-------------|-------------|----------|
| rs4805825  | CCDC123   | A/G | 19q | G | 0.178571429 | 0.193693694 | 0.69289  |
| rs3219484  | MUTYH     | A/G | 01p | A | 0.075892857 | 0.085585586 | 0.692977 |
| rs7158139  |           | A/G | 14q | A | 0.207207207 | 0.191964286 | 0.693057 |
| rs7100403  | C10orf112 | A/G | 10p | A | 0.427272727 | 0.440366972 | 0.693382 |
| rs2290652  | ZNF302    | C/T | 19q | C | 0.388392857 | 0.369369369 | 0.693413 |
| rs226959   | C6orf145  | C/G | 06p | G | 0.333333333 | 0.352678571 | 0.693492 |
| rs3808782  | C9orf39   | A/G | 09p | A | 0.076576577 | 0.088785047 | 0.693561 |
| rs2354336  | KIAA1549  | A/C | 07q | A | 0.075892857 | 0.066964286 | 0.69384  |
| rs7978894  | C12orf63  | C/T | 12q | C | 0.272727273 | 0.290178571 | 0.693916 |
| rs7499843  |           | A/T | 16q | A | 0.315315315 | 0.334821429 | 0.693952 |
| rs2288467  | CDH9      | C/T | 05p | C | 0.477678571 | 0.495535714 | 0.694159 |
| rs2501968  | CENPQ     | A/G | 06p | G | 0.401785714 | 0.382882883 | 0.694384 |
| rs4838554  | C10orf53  | C/T | 10q | T | 0.472972973 | 0.491071429 | 0.694415 |
| rs879664   | LOC339766 | C/T | 02q | T | 0.0625      | 0.072072072 | 0.694426 |
| rs3747531  | MSR1      | C/G | 08p | C | 0.058035714 | 0.049549549 | 0.694435 |
| rs7240666  | ALPK2     | C/T | 18q | T | 0.216216216 | 0.200892857 | 0.694511 |
| rs1047266  | TNFRSF10B | C/T | 08p | T | 0.063063063 | 0.055045872 | 0.694578 |
| rs3819946  | CRYZ      | C/T | 01p | C | 0.129464286 | 0.118181818 | 0.694644 |
| rs1127410  | PIGG      | C/T | 04p | C | 0.121052632 | 0.107954545 | 0.694669 |
| rs1126478  | LTF       | A/G | 03p | G | 0.309090909 | 0.292792793 | 0.695331 |
| rs3814596  | PITRM1    | A/G | 10p | G | 0.21875     | 0.202702703 | 0.695542 |
| rs7397032  | OR56B1    | C/T | 11p | T | 0.162037037 | 0.174528302 | 0.695927 |
| rs165602   | NEFH      | A/C | 22q | C | 0.138392857 | 0.151785714 | 0.696025 |
| rs2270968  | MCCC1     | A/C | 03q | A | 0.281818182 | 0.265765766 | 0.696246 |
| rs11603869 | C11orf47  | C/G | 11p | G | 0.198198198 | 0.184684685 | 0.696298 |
| rs7208422  | TMC8      | A/T | 17q | A | 0.473214286 | 0.491071429 | 0.696364 |
| rs2286025  | TMEM106C  | A/G | 12q | A | 0.138392857 | 0.125       | 0.696802 |
| rs2397965  | CES7      | C/T | 16q | T | 0.174107143 | 0.160714286 | 0.696928 |
| rs7935453  |           | C/G | 11p | C | 0.27027027  | 0.254464286 | 0.696941 |
| rs8057643  | A2BP1     | C/T | 16p | C | 0.241071429 | 0.225225225 | 0.69703  |
| rs4309825  | KLHL2     | A/G | 04q | G | 0.316964286 | 0.299107143 | 0.697076 |
| rs743923   | SLC26A8   | A/G | 06p | A | 0.225225225 | 0.209090909 | 0.697484 |
| rs2306985  | MTTP      | C/G | 04q | G | 0.415887851 | 0.395238095 | 0.697611 |
| rs9636845  | KRTAP11-1 | A/T | 21q | T | 0.0625      | 0.071428571 | 0.697712 |
| rs2706762  | PCYOX1    | C/T | 02p | T | 0.169642857 | 0.15625     | 0.697823 |
| rs913257   | SCYL1BP1  | A/G | 01q | G | 0.486607143 | 0.495495496 | 0.697894 |
| rs891921   | SLIT3     | C/T | 05q | T | 0.125       | 0.112612613 | 0.698525 |

|            |                  |     |     |   |             |             |          |
|------------|------------------|-----|-----|---|-------------|-------------|----------|
| rs11571223 |                  | G/T | 11q | T | 0.147321429 | 0.160714286 | 0.698595 |
| rs1877731  | FAT              | C/G | 04q | C | 0.171296296 | 0.182692308 | 0.698672 |
| rs7330197  |                  | A/T | 13q | T | 0.428571429 | 0.446428571 | 0.698724 |
| rs1053338  | ATXN7            | A/G | 03p | G | 0.113207547 | 0.101941748 | 0.698782 |
| rs7662486  |                  | C/T | 04q | T | 0.25        | 0.236607143 | 0.699356 |
| rs4349489  | LMCD1            | C/G | 03p | G | 0.491071429 | 0.472972973 | 0.699372 |
| rs10868138 | SLC28A3          | C/T | 09q | C | 0.089285714 | 0.080357143 | 0.699727 |
| rs1780680  | C20orf132        | G/T | 20q | T | 0.441964286 | 0.45945946  | 0.699773 |
| rs9346     | C20orf111        | G/T | 20q | G | 0.165178571 | 0.178571429 | 0.699847 |
| rs10819260 | RALGPS1          | C/T | 09q | T | 0.193693694 | 0.178571429 | 0.699996 |
| rs3093153  | CYP4F2           | G/T | 19p | T | 0.064220184 | 0.056074766 | 0.700627 |
| rs3795737  | C1orf66, ISG20L2 | C/T | 01q | C | 0.071428571 | 0.0625      | 0.700883 |
| rs7129229  | FAT3             | A/T | 11q | T | 0.169642857 | 0.183035714 | 0.7014   |
| rs11575584 | IL11RA, CCL27    | A/G | 09p | A | 0.059090909 | 0.050458716 | 0.701509 |
| rs2647573  | OR51Q1           | A/G | 11p | G | 0.383928571 | 0.400900901 | 0.701636 |
| rs1864183  | ATG10            | A/G | 05q | A | 0.418918919 | 0.436936937 | 0.701872 |
| rs2064613  |                  | A/C | 20q | C | 0.366071429 | 0.383928571 | 0.702014 |
| rs947894   |                  | A/G | 11q | G | 0.34375     | 0.36036036  | 0.702295 |
| rs6785339  | TM4SF19          | G/T | 03q | T | 0.40625     | 0.387387387 | 0.702611 |
| rs770087   | DUSP6            | G/T | 12q | G | 0.171296296 | 0.186363636 | 0.702911 |
| rs8182086  | ZNF592           | A/G | 15q | A | 0.175675676 | 0.189189189 | 0.703008 |
| rs10064102 |                  | A/T | 05q | A | 0.191964286 | 0.178571429 | 0.703141 |
| rs4698803  | EGF              | A/T | 04q | A | 0.25        | 0.234234234 | 0.703173 |
| rs1527263  | tcag7.1314       | C/T | 07q | T | 0.254545455 | 0.238317757 | 0.703254 |
| rs764205   | LRIT3            | A/T | 04q | T | 0.388392857 | 0.370535714 | 0.703283 |
| rs7698680  | CCDC110          | A/T | 04q | T | 0.486607143 | 0.495535714 | 0.703374 |
| rs657672   |                  | C/T | 17q | T | 0.165178571 | 0.151785714 | 0.703454 |
| rs11237145 | GDPD4            | C/T | 11q | C | 0.361607143 | 0.379464286 | 0.703543 |
| rs2401751  | PTPN21           | C/T | 14q | T | 0.364864865 | 0.348214286 | 0.703775 |
| rs3800544  | WDR27            | C/T | 06q | T | 0.071428571 | 0.0625      | 0.703804 |
| rs197414   | DDX20            | A/C | 01p | A | 0.151785714 | 0.138392857 | 0.703838 |
| rs5065     | NPPA             | A/G | 01p | G | 0.169642857 | 0.183035714 | 0.704337 |
| rs8061734  |                  | G/T | 16p | G | 0.153153153 | 0.13963964  | 0.704693 |
| rs7855745  | ROD1             | C/T | 09q | C | 0.458333333 | 0.476851852 | 0.704958 |
| rs140504   | BCR              | A/G | 22q | A | 0.151785714 | 0.162162162 | 0.705106 |
| rs8056547  | A2BP1            | C/G | 16p | G | 0.464285714 | 0.446428571 | 0.70514  |
| rs6776064  | C3orf34          | C/T | 03q | C | 0.366071429 | 0.348214286 | 0.705166 |

|            |                      |     |     |   |             |             |          |
|------------|----------------------|-----|-----|---|-------------|-------------|----------|
| rs2228248  | GTF3C1               | A/G | 16p | A | 0.165178571 | 0.178571429 | 0.705213 |
| rs2280085  | NUP210               | C/G | 03p | G | 0.178571429 | 0.191964286 | 0.705446 |
| rs3795605  | DUSP27               | A/G | 01q | A | 0.142857143 | 0.15625     | 0.705454 |
| rs4294502  | TTC18                | C/T | 10q | C | 0.080357143 | 0.071428571 | 0.705459 |
| rs838100   | STEAP3               | A/G | 02q | A | 0.364864865 | 0.383928571 | 0.705598 |
| rs2303909  | GFM1                 | C/T | 03q | C | 0.477678571 | 0.459821429 | 0.705622 |
| rs4758423  | C11orf47             | C/T | 11p | T | 0.330357143 | 0.3125      | 0.705681 |
| rs10999947 | CDH23                | A/G | 10q | A | 0.254464286 | 0.238738739 | 0.706029 |
| rs10498520 |                      | A/G | 14q | A | 0.495535714 | 0.486486486 | 0.706056 |
| rs2822612  |                      | A/G | 21q | G | 0.318181818 | 0.334821429 | 0.706161 |
| rs2227264  | TAS2R5               | G/T | 07q | T | 0.495535714 | 0.477678571 | 0.706207 |
| rs3741628  | C12orf41             | G/T | 12q | G | 0.446428571 | 0.428571429 | 0.706244 |
| rs3748433  | CEP250               | C/T | 20q | T | 0.080357143 | 0.071428571 | 0.706278 |
| rs7555046  |                      | C/T | 01q | C | 0.15625     | 0.142857143 | 0.706333 |
| rs807289   |                      | A/C | 16q | A | 0.486607143 | 0.495535714 | 0.706365 |
| rs4986764  | BRIP1                | C/T | 17q | T | 0.410714286 | 0.392857143 | 0.706525 |
| rs1339374  | C9orf100, CCDC107    | C/T | 09p | T | 0.174107143 | 0.189189189 | 0.706564 |
| rs783396   | AIM1                 | A/C | 06q | A | 0.071428571 | 0.080357143 | 0.706627 |
| rs4522268  | OR6C74               | C/T | 12q | T | 0.299107143 | 0.316964286 | 0.706655 |
| rs3829037  | MTSS1                | A/G | 08q | G | 0.191964286 | 0.18018018  | 0.706799 |
| rs3823646  | GAL3ST4              | C/T | 07q | C | 0.427927928 | 0.445945946 | 0.706946 |
| rs12611515 |                      | C/T | 02q | T | 0.333333333 | 0.316964286 | 0.707151 |
| rs1837949  | LOC729184            | A/G | 10q | G | 0.308035714 | 0.290178571 | 0.70727  |
| rs6911096  | SYNE1                | A/T | 06q | A | 0.265765766 | 0.25        | 0.707501 |
| rs10878075 | DPY19L2              | C/T | 12q | C | 0.234375    | 0.223958333 | 0.707521 |
| rs522063   | EXDL1                | C/T | 15q | T | 0.241071429 | 0.227678571 | 0.707597 |
| rs3739722  | GRIN3A               | A/G | 09q | A | 0.129464286 | 0.142857143 | 0.707633 |
| rs1993771  |                      | A/G | 09q | A | 0.095454545 | 0.084821429 | 0.707882 |
| rs6076122  | CST1                 | A/G | 20p | A | 0.348214286 | 0.330357143 | 0.708161 |
| rs2075085  |                      | C/T | 07p | T | 0.366071429 | 0.383928571 | 0.708222 |
| rs3731644  | SH3BP4               | C/T | 02q | C | 0.116071429 | 0.129464286 | 0.708471 |
| rs9652588  | PDILT                | C/T | 16p | T | 0.495535714 | 0.486363636 | 0.70853  |
| rs6468171  | C8orf41, RBM13       | A/G | 08p | A | 0.401785714 | 0.383928571 | 0.708545 |
| rs4955216  | LOC344787, LOC731901 | G/T | 03p | T | 0.178571429 | 0.165178571 | 0.708621 |
| rs10961700 | FREM1                | C/T | 09p | T | 0.169642857 | 0.15625     | 0.708663 |
| rs8179183  | LEPR                 | C/G | 01p | C | 0.184684685 | 0.198198198 | 0.708678 |
| rs282129   | GABRR2               | C/T | 06q | T | 0.261904762 | 0.245535714 | 0.708734 |

|            |                        |     |     |   |             |             |          |
|------------|------------------------|-----|-----|---|-------------|-------------|----------|
| rs1062633  | MST1R                  | A/G | 03p | A | 0.5         | 0.482142857 | 0.708811 |
| rs2270781  |                        | A/G | 03q | A | 0.191964286 | 0.205357143 | 0.709221 |
| rs1041073  | B3GALTL                | C/T | 13q | C | 0.194174757 | 0.182242991 | 0.709379 |
| rs2412544  | CASC5                  | C/T | 15q | T | 0.388392857 | 0.370535714 | 0.709524 |
| rs2293277  | CEP55                  | A/T | 10q | A | 0.222222222 | 0.236607143 | 0.710071 |
| rs1800458  | TTR                    | A/G | 18q | A | 0.067567568 | 0.076576577 | 0.710267 |
| rs2832127  |                        | C/T | 21q | T | 0.209090909 | 0.193693694 | 0.710384 |
| rs2910313  | PCDHB7                 | C/G | 05q | G | 0.433035714 | 0.450450451 | 0.710528 |
| rs7917573  | KIAA1462               | C/G | 10p | G | 0.364130435 | 0.351648352 | 0.710541 |
| rs931312   | TIAM2                  | C/T | 06q | T | 0.1875      | 0.174107143 | 0.710654 |
| rs540742   | GIPC2                  | C/T | 01p | C | 0.263392857 | 0.25        | 0.710992 |
| rs3829817  | FBN3                   | A/G | 19p | A | 0.232142857 | 0.21875     | 0.711194 |
| rs2234237  | TREM1                  | A/T | 06p | T | 0.075892857 | 0.066964286 | 0.711611 |
| rs4958531  | NMUR2                  | C/T | 05q | C | 0.183035714 | 0.196428571 | 0.711814 |
| rs4958535  | NMUR2                  | C/G | 05q | G | 0.183035714 | 0.196428571 | 0.711814 |
| rs11168459 | OR10AD1, DKFZP779L1853 | A/G | 12q | G | 0.247747748 | 0.232142857 | 0.711884 |
| rs11051266 | OVOS2                  | A/G | 12p | A | 0.435483871 | 0.453125    | 0.711951 |
| rs2254357  | HSPG2                  | C/G | 01p | C | 0.310810811 | 0.327272727 | 0.711981 |
| rs1052501  | ULK4                   | A/G | 03p | G | 0.165178571 | 0.151785714 | 0.712046 |
| rs36571    | ASCC2                  | A/G | 22q | A | 0.076576577 | 0.066964286 | 0.712296 |
| rs556754   |                        | A/G | 11q | A | 0.446428571 | 0.464285714 | 0.712395 |
| rs11057939 | DHX37                  | C/T | 12q | T | 0.147321429 | 0.133928571 | 0.712426 |
| rs10941112 | AMACR                  | A/G | 05p | G | 0.490990991 | 0.472477064 | 0.712484 |
| rs9323693  | OR11H6                 | C/G | 14q | G | 0.089622642 | 0.080188679 | 0.712793 |
| rs1736557  | FMO3                   | A/G | 01q | A | 0.067961165 | 0.059405941 | 0.712877 |
| rs6166     | FSHR                   | A/G | 02p | G | 0.428571429 | 0.445945946 | 0.712897 |
| rs1047677  |                        | G/T | 09p | T | 0.166666667 | 0.177272727 | 0.712946 |
| rs2072579  | SART3, ISCU            | C/G | 12q | C | 0.18018018  | 0.191964286 | 0.712977 |
| rs1805049  | USH2A                  | A/G | 01q | G | 0.388392857 | 0.405405405 | 0.713179 |
| rs11498    | LOC339804              | A/G | 02p | G | 0.472727273 | 0.454954955 | 0.71323  |
| rs12572012 | MPHOSPH1               | A/T | 10q | T | 0.174107143 | 0.1875      | 0.713235 |
| rs3758388  | MPHOSPH1               | A/T | 10q | T | 0.174107143 | 0.1875      | 0.713235 |
| rs619381   | TAS2R7                 | C/T | 12p | T | 0.102678571 | 0.09375     | 0.713292 |
| rs1559     | LOC731151              | A/C | 19q | A | 0.081081081 | 0.071428571 | 0.713389 |
| rs12507099 | BMP2K                  | C/G | 04q | G | 0.112612613 | 0.103603604 | 0.713581 |
| rs3745081  |                        | C/T | 18q | C | 0.401785714 | 0.418918919 | 0.713581 |

|            |               |     |     |   |             |             |          |
|------------|---------------|-----|-----|---|-------------|-------------|----------|
| rs12582    | DKFZp762E1312 | A/G | 02q | A | 0.098958333 | 0.108695652 | 0.713737 |
| rs2076559  | ENTPD6        | A/G | 20p | A | 0.357142857 | 0.340909091 | 0.713836 |
| rs3816988  | TLN2          | A/G | 15q | G | 0.1875      | 0.200892857 | 0.713864 |
| rs2280250  |               | A/G | 04p | A | 0.316964286 | 0.333333333 | 0.713877 |
| rs708035   | IRAK2         | A/T | 03p | T | 0.35        | 0.337837838 | 0.713889 |
| rs1383180  | EVC           | C/T | 04p | T | 0.401785714 | 0.381818182 | 0.713997 |
| rs2329356  | KLHL22        | G/T | 22q | G | 0.055045872 | 0.0625      | 0.714173 |
| rs938608   | ACAN          | G/T | 15q | G | 0.330357143 | 0.348214286 | 0.714309 |
| rs2066807  | STAT2         | C/G | 12q | C | 0.063063063 | 0.071428571 | 0.714602 |
| rs1715828  | WDR69         | A/T | 02q | A | 0.191964286 | 0.178571429 | 0.714628 |
| rs1757095  | TNC           | C/T | 09q | T | 0.089285714 | 0.080357143 | 0.714679 |
| rs2242093  | ZC3H3         | A/G | 08q | G | 0.160714286 | 0.148648649 | 0.714951 |
| rs918949   | TNS1          | C/T | 02q | C | 0.433035714 | 0.415178571 | 0.714993 |
| rs9490809  | TRDN          | C/G | 06q | G | 0.450892857 | 0.468468469 | 0.715046 |
| rs4632862  |               | A/G | 06q | G | 0.388392857 | 0.372727273 | 0.715136 |
| rs4495918  | OR52E6        | A/C | 11p | A | 0.366071429 | 0.351351351 | 0.715188 |
| rs12156420 | C8orf79       | C/G | 08p | G | 0.058035714 | 0.066964286 | 0.715233 |
| rs6962756  | ASB15         | C/T | 07q | C | 0.21875     | 0.205357143 | 0.71528  |
| rs9300756  | FLJ40176      | A/G | 13q | G | 0.419642857 | 0.4375      | 0.715293 |
| rs670573   | MRPS24        | C/T | 07p | C | 0.080357143 | 0.071428571 | 0.715403 |
| rs1061627  | RECQL, GOLT1B | C/T | 12p | C | 0.196428571 | 0.183035714 | 0.715711 |
| rs1507535  | LOC729147     | G/T | 11p | G | 0.427927928 | 0.40990991  | 0.716151 |
| rs9897720  | LOC728991     | C/T | 17q | T | 0.113636364 | 0.103603604 | 0.71616  |
| rs4432930  |               | C/T | 05q | T | 0.424107143 | 0.40625     | 0.716388 |
| rs3811040  | CKAP2L        | A/G | 02q | A | 0.472972973 | 0.491071429 | 0.716427 |
| rs542237   |               | C/T | 18q | C | 0.243243243 | 0.258928571 | 0.716482 |
| rs12544854 | ASAH1         | C/T | 08p | T | 0.486111111 | 0.5         | 0.71658  |
| rs156697   | GSTO2         | C/T | 10q | C | 0.392857143 | 0.40990991  | 0.716718 |
| rs2277114  | FLJ25791      | C/T | 06q | T | 0.392857143 | 0.410714286 | 0.71677  |
| rs10737374 | CSMD2         | A/G | 01p | G | 0.274774775 | 0.290178571 | 0.716933 |
| rs1801019  | UMPS          | C/G | 03q | C | 0.15        | 0.160714286 | 0.71709  |
| rs2272935  | NPAL3         | C/T | 01p | T | 0.285714286 | 0.303571429 | 0.71747  |
| rs1049532  |               | A/G | 05q | A | 0.373873874 | 0.392857143 | 0.717505 |
| rs1130643  | SPARCL1       | A/G | 04q | G | 0.116071429 | 0.107142857 | 0.71756  |
| rs4788587  | PKD1L3        | A/G | 16q | A | 0.15625     | 0.168181818 | 0.717579 |
| rs6509544  | SIGLEC12      | C/G | 19q | G | 0.13963964  | 0.151785714 | 0.718011 |
| rs6098     | SERPIN2       | A/G | 18q | G | 0.245535714 | 0.232142857 | 0.718101 |

|            |               |     |     |   |             |             |          |
|------------|---------------|-----|-----|---|-------------|-------------|----------|
| rs3816281  | PLEK          | G/T | 02p | T | 0.252252252 | 0.267857143 | 0.718203 |
| rs3130764  | OR2J3         | A/G | 06p | A | 0.222727273 | 0.208333333 | 0.718403 |
| rs2230739  | ADCY9         | A/G | 16p | G | 0.339285714 | 0.324324324 | 0.718606 |
| rs10953315 | MUC12         | A/G | 07q | G | 0.243243243 | 0.258928571 | 0.718611 |
| rs2431363  | IQGAP2        | C/T | 05q | T | 0.37        | 0.385057471 | 0.718631 |
| rs2291691  | PPFIA4        | G/T | 01q | G | 0.202702703 | 0.214285714 | 0.718733 |
| rs534606   |               | A/G | 11q | A | 0.086363636 | 0.077272727 | 0.71891  |
| rs188703   | VCAN          | C/T | 05q | T | 0.369369369 | 0.354545455 | 0.719038 |
| rs2254562  | SYNJ1         | C/T | 21q | C | 0.3125      | 0.299107143 | 0.719111 |
| rs2171492  | CPA4          | G/T | 07q | T | 0.401785714 | 0.419642857 | 0.719345 |
| rs3740871  |               | A/G | 11p | A | 0.3125      | 0.328828829 | 0.71948  |
| rs557337   | TBC1D4        | A/G | 13q | G | 0.075892857 | 0.066964286 | 0.719794 |
| rs10500209 | ZNF439        | A/G | 19p | G | 0.22972973  | 0.214285714 | 0.720053 |
| rs2276932  | ARHGAP10      | C/T | 04q | C | 0.066964286 | 0.075892857 | 0.720079 |
| rs16941    | BRCA1         | A/G | 17q | G | 0.318181818 | 0.330275229 | 0.720499 |
| rs1476387  | SMPD2, MICAL1 | G/T | 06q | T | 0.418181818 | 0.436363636 | 0.720764 |
| rs10490392 |               | G/T | 02q | G | 0.433035714 | 0.45045045  | 0.72078  |
| rs2627037  | TTN           | A/G | 02q | A | 0.09375     | 0.084821429 | 0.720863 |
| rs337619   | FLJ13197      | G/T | 04p | T | 0.227678571 | 0.214285714 | 0.720971 |
| rs2235197  | UNC93A        | A/G | 06q | A | 0.0625      | 0.071428571 | 0.721054 |
| rs1375719  | LOC643677     | C/T | 13q | C | 0.486486486 | 0.46875     | 0.721126 |
| rs9294445  | MDN1          | A/G | 06q | A | 0.5         | 0.482142857 | 0.721273 |
| rs2293404  | IQCE          | C/T | 07p | T | 0.263392857 | 0.279279279 | 0.721439 |
| rs7150854  |               | A/G | 14q | G | 0.169642857 | 0.183035714 | 0.721563 |
| rs2659880  | OR2AG1        | A/C | 11p | A | 0.34375     | 0.36036036  | 0.721706 |
| rs1769259  | FBP1          | A/G | 09q | G | 0.0625      | 0.049019608 | 0.721715 |
| rs2433     | C17orf42      | A/G | 17q | G | 0.118181818 | 0.10952381  | 0.721765 |
| rs671431   |               | C/G | 01p | C | 0.198198198 | 0.184684685 | 0.721768 |
| rs3744108  | MTMR4         | C/G | 17q | C | 0.344339623 | 0.359813084 | 0.721829 |
| rs10424345 |               | A/G | 19p | A | 0.142857143 | 0.130630631 | 0.721844 |
| rs7604639  | MERTK         | A/G | 02q | G | 0.370535714 | 0.388392857 | 0.722041 |
| rs6489795  |               | C/G | 12q | G | 0.066964286 | 0.058558559 | 0.722225 |
| rs2301574  | LOC283152     | C/T | 11q | T | 0.276785714 | 0.263392857 | 0.722271 |
| rs7600360  |               | C/T | 02q | C | 0.09009009  | 0.081081081 | 0.722326 |
| rs6969691  | SAMD9         | A/G | 07q | G | 0.118181818 | 0.129464286 | 0.722462 |
| rs1133330  | MAN2B1        | A/G | 19p | A | 0.414414414 | 0.433035714 | 0.722495 |
| rs1718119  | P2RX7         | C/T | 12q | T | 0.379464286 | 0.396396396 | 0.722538 |



|            |                  |     |     |   |             |             |          |
|------------|------------------|-----|-----|---|-------------|-------------|----------|
| rs763361   | CD226            | C/T | 18q | T | 0.445945946 | 0.462264151 | 0.722722 |
| rs12621643 | KCNE4            | G/T | 02q | T | 0.298165138 | 0.283783784 | 0.723088 |
| rs4936966  | CCDC15           | A/G | 11q | A | 0.209821429 | 0.223214286 | 0.723107 |
| rs9885672  | FIG4             | C/T | 06q | C | 0.193693694 | 0.180555556 | 0.723167 |
| rs1500480  | LOC339766        | C/T | 02q | T | 0.165178571 | 0.151785714 | 0.723249 |
| rs12576296 |                  | C/T | 11p | T | 0.310810811 | 0.325471698 | 0.723265 |
| rs7636957  |                  | C/G | 03p | G | 0.414414414 | 0.396396396 | 0.7235   |
| rs3731894  |                  | C/T | 02q | T | 0.075892857 | 0.066964286 | 0.72365  |
| rs2297950  | CHIT1            | C/T | 01q | T | 0.295454546 | 0.310810811 | 0.723861 |
| rs4244454  | ChGn             | C/T | 08p | C | 0.174107143 | 0.1875      | 0.723944 |
| rs1885533  | HEATR1           | A/G | 01q | A | 0.34375     | 0.357142857 | 0.723948 |
| rs6691117  | CR1              | A/G | 01q | G | 0.222222222 | 0.21        | 0.724137 |
| rs553928   |                  | C/T | 01q | T | 0.370535714 | 0.383928571 | 0.724205 |
| rs11209235 | LOC149224        | C/T | 01p | T | 0.058558559 | 0.066964286 | 0.724231 |
| rs10414834 | ZNF493           | C/G | 19p | G | 0.186363636 | 0.197247706 | 0.72429  |
| rs1044303  | LOC285733        | A/G | 06q | A | 0.283783784 | 0.268181818 | 0.724348 |
| rs7937809  |                  | A/G | 11q | A | 0.40990991  | 0.392857143 | 0.724443 |
| rs4785755  | AFG3L1, MGC16385 | A/G | 16q | G | 0.285714286 | 0.272321429 | 0.725268 |
| rs3087399  | REV1             | A/G | 02q | G | 0.118181818 | 0.108108108 | 0.725338 |
| rs2236316  | NIN              | C/G | 14q | C | 0.258928571 | 0.274774775 | 0.725484 |
| rs7778635  |                  | C/G | 07p | C | 0.09375     | 0.084821429 | 0.725644 |
| rs6805421  | KBTBD5           | A/G | 03p | A | 0.361607143 | 0.34375     | 0.725698 |
| rs10090516 |                  | A/C | 08p | A | 0.058035714 | 0.049549549 | 0.725782 |
| rs558813   | TMEM45B          | A/G | 11q | A | 0.196428571 | 0.183035714 | 0.725796 |
| rs218966   | PHF14            | C/T | 07p | T | 0.337837838 | 0.352678571 | 0.726588 |
| rs12154540 | ZNF679           | A/G | 07q | G | 0.243243243 | 0.229357798 | 0.726773 |
| rs2291311  | TTN              | C/T | 02q | C | 0.075892857 | 0.067567568 | 0.726775 |
| rs4834567  |                  | A/C | 04q | A | 0.162162162 | 0.151785714 | 0.726794 |
| rs151358   | SLMO2            | A/C | 20q | A | 0.236607143 | 0.223214286 | 0.72685  |
| rs7297245  | HAL              | C/T | 12q | C | 0.209821429 | 0.223214286 | 0.726998 |
| rs406113   | GPX6             | A/C | 06p | C | 0.325892857 | 0.3125      | 0.72702  |
| rs1077236  | CCDC26           | A/C | 08q | A | 0.1875      | 0.175675676 | 0.727246 |
| rs12349140 | LOC392288        | G/T | 09p | T | 0.337837838 | 0.352678571 | 0.727326 |
| rs1390938  | SLC18A1          | A/G | 08p | A | 0.232142857 | 0.245535714 | 0.727491 |
| rs1126933  | CDH3             | C/G | 16q | C | 0.383928571 | 0.401785714 | 0.727539 |
| rs4843075  | AKAP13           | A/G | 15q | G | 0.40625     | 0.387096774 | 0.727561 |
| rs11249552 | COL23A1          | A/C | 05q | A | 0.089285714 | 0.080357143 | 0.727806 |

|            |                                    |     |     |   |             |             |          |
|------------|------------------------------------|-----|-----|---|-------------|-------------|----------|
| rs2889732  | C20orf186                          | A/C | 20q | C | 0.34375     | 0.36036036  | 0.727903 |
| rs11666105 | DHDH                               | C/T | 19q | C | 0.178571429 | 0.191964286 | 0.728107 |
| rs868733   | H2AFY                              | C/T | 05q | T | 0.075892857 | 0.066964286 | 0.728135 |
| rs1851270  |                                    | A/G | 17p | A | 0.067567568 | 0.058558559 | 0.7282   |
| rs1345658  | ZNF30                              | C/T | 19q | C | 0.473214286 | 0.491071429 | 0.728395 |
| rs2846412  | EXPH5                              | A/G | 11q | A | 0.397321429 | 0.415178571 | 0.728441 |
| rs135796   | FLJ44385                           | A/G | 22q | G | 0.084821429 | 0.075892857 | 0.72847  |
| rs11853932 | AGBL1                              | A/G | 15q | G | 0.315315315 | 0.330275229 | 0.728533 |
| rs3747495  | KIAA1529                           | A/G | 09q | G | 0.160714286 | 0.148648649 | 0.728561 |
| rs1515442  | SPATA16                            | A/G | 03q | G | 0.259433962 | 0.276190476 | 0.728649 |
| rs11615962 | MUC19, LOC647546                   | C/G | 12q | C | 0.09375     | 0.103603604 | 0.728675 |
| rs3130827  | LOC642024, LOC646317,<br>LOC651503 | C/T | 06p | T | 0.35        | 0.364864865 | 0.729105 |
| rs1432547  |                                    | A/G | 02p | A | 0.267857143 | 0.28125     | 0.7293   |
| rs2275801  | ZMYND8                             | A/G | 20q | G | 0.075892857 | 0.067567568 | 0.729437 |
| rs2274407  | ABCC4                              | A/C | 13q | A | 0.080357143 | 0.071428571 | 0.729619 |
| rs11151964 | CNDP1                              | A/G | 18q | A | 0.127272727 | 0.13963964  | 0.729674 |
| rs4074536  | CASQ2                              | C/T | 01p | C | 0.331632653 | 0.348958333 | 0.729681 |
| rs10826793 |                                    | C/T | 10p | T | 0.330357143 | 0.316964286 | 0.729851 |
| rs11698080 | LAMA5                              | C/T | 20q | T | 0.227272727 | 0.214285714 | 0.730029 |
| rs811925   | PRDM1                              | C/G | 06q | C | 0.144144144 | 0.153153153 | 0.730401 |
| rs12629133 | RPL32, CAND2                       | A/G | 03p | G | 0.361607143 | 0.378378378 | 0.730424 |
| rs7250969  | ZNF137                             | A/G | 19q | A | 0.21875     | 0.205357143 | 0.730628 |
| rs6923492  | GRM1                               | C/T | 06q | T | 0.370967742 | 0.356321839 | 0.730662 |
| rs3846009  |                                    | A/G | 03p | A | 0.337837838 | 0.352678571 | 0.730687 |
| rs6519442  | LOC388882                          | G/T | 22q | G | 0.294642857 | 0.279279279 | 0.730893 |
| rs4301626  | FCRL6                              | C/T | 01q | C | 0.058035714 | 0.067567568 | 0.73101  |
| rs2696513  | LOC644264                          | A/G | 17q | G | 0.18018018  | 0.191964286 | 0.731284 |
| rs2248490  | WDR4                               | C/G | 21q | G | 0.5         | 0.482142857 | 0.731365 |
| rs2295101  |                                    | C/T | 01q | T | 0.098214286 | 0.108108108 | 0.731473 |
| rs460184   | CFH                                | A/G | 01q | G | 0.330357143 | 0.31981982  | 0.73159  |
| rs8014119  | REM2                               | C/G | 14q | C | 0.084821429 | 0.075892857 | 0.731683 |
| rs7107539  | OR8D1                              | A/C | 11q | C | 0.402777778 | 0.386363636 | 0.731737 |
| rs4937586  |                                    | A/C | 11q | A | 0.254464286 | 0.267857143 | 0.731788 |
| rs2460255  | TGFBRAP1                           | C/T | 02q | T | 0.147321429 | 0.159090909 | 0.732062 |
| rs4144901  | NPAT                               | A/T | 11q | A | 0.147321429 | 0.135135135 | 0.732122 |
| rs10876023 | LOC121006                          | A/G | 12q | A | 0.306306306 | 0.321428571 | 0.732351 |

|            |                      |     |     |   |             |             |          |
|------------|----------------------|-----|-----|---|-------------|-------------|----------|
| rs1827125  |                      | C/T | 08q | T | 0.234234234 | 0.247747748 | 0.732628 |
| rs7854413  | PDCD1LG2             | C/T | 09p | C | 0.098214286 | 0.107142857 | 0.732753 |
| rs3811444  | TRIM58               | C/T | 01q | T | 0.348214286 | 0.361607143 | 0.732938 |
| rs2296262  | DFNB31               | A/G | 09q | A | 0.379464286 | 0.363636364 | 0.733005 |
| rs4963     | ADD1                 | C/G | 04p | G | 0.157657658 | 0.169642857 | 0.733116 |
| rs11207949 | ANKRD38              | C/T | 01p | C | 0.236607143 | 0.222727273 | 0.733171 |
| rs1517618  | SLCO3A1              | C/G | 15q | C | 0.147321429 | 0.157657658 | 0.733186 |
| rs2101919  | NID2                 | A/G | 14q | G | 0.243243243 | 0.259090909 | 0.733314 |
| rs464333   | LOC732226            | A/G | 21q | A | 0.157657658 | 0.171171171 | 0.7334   |
| rs2075274  | MGC16703             | A/G | 22q | A | 0.351351351 | 0.336363636 | 0.733437 |
| rs1065205  | SERPINB3             | A/G | 18q | G | 0.076576577 | 0.084821429 | 0.733799 |
| rs85276    | DDX20                | C/T | 01p | C | 0.151785714 | 0.13963964  | 0.733831 |
| rs7779     | SCCPDH               | C/G | 01q | G | 0.075892857 | 0.066964286 | 0.734095 |
| rs2289025  | PARD3B               | A/G | 02q | G | 0.410714286 | 0.392857143 | 0.734171 |
| rs11746    | FCRLA                | A/G | 01q | G | 0.495412844 | 0.490825688 | 0.734694 |
| rs1054487  | MAN2B1               | C/T | 19p | T | 0.415178571 | 0.433035714 | 0.73492  |
| rs2307340  | MCM5                 | C/G | 22q | G | 0.072727273 | 0.081081081 | 0.734947 |
| rs4661661  | FLJ37453, LOC729614  | C/T | 01p | C | 0.102678571 | 0.111607143 | 0.734997 |
| rs9654132  | FLJ16686             | A/G | 04p | A | 0.265765766 | 0.25        | 0.735256 |
| rs437179   | SKIV2L               | G/T | 06p | T | 0.276785714 | 0.263392857 | 0.735345 |
| rs10814571 | POLR1E               | A/G | 09p | A | 0.207207207 | 0.220183486 | 0.735404 |
| rs2105960  |                      | G/T | 06p | G | 0.436363636 | 0.418918919 | 0.735587 |
| rs10500424 | LOC729155, LOC729159 | C/G | 16q | C | 0.160714286 | 0.148648649 | 0.735752 |
| rs12649293 | KLHL8                | C/T | 04q | T | 0.209821429 | 0.223214286 | 0.735871 |
| rs10765565 | FAT3                 | G/T | 11q | T | 0.40625     | 0.389908257 | 0.735982 |
| rs10412452 |                      | A/G | 19q | A | 0.183035714 | 0.169642857 | 0.736034 |
| rs4514018  |                      | C/T | 08q | C | 0.351351351 | 0.337837838 | 0.736377 |
| rs1178027  | PTPRA                | C/T | 20p | T | 0.089285714 | 0.098214286 | 0.736606 |
| rs3762568  | FASTKD2              | A/G | 02q | A | 0.068807339 | 0.076923077 | 0.736608 |
| rs2271001  | ZDHHC13              | A/G | 11p | A | 0.303571429 | 0.316964286 | 0.736871 |
| rs2161468  | COL5A3               | C/G | 19p | C | 0.427272727 | 0.412844037 | 0.736976 |
| rs9989177  | C14orf104            | C/T | 14q | T | 0.454545455 | 0.46875     | 0.737341 |
| rs957794   | LOC728076, LOC732309 | C/G | 21q | G | 0.112612613 | 0.102678571 | 0.737481 |
| rs10513680 | SAMD7                | C/G | 03q | C | 0.126126126 | 0.116071429 | 0.737645 |
| rs928661   | KIAA0774             | G/T | 13q | T | 0.072072072 | 0.080357143 | 0.737681 |
| rs3734114  | ATG10                | C/T | 05q | C | 0.165178571 | 0.154545454 | 0.737907 |
| rs909545   | TTLL2                | A/G | 06q | A | 0.26        | 0.245098039 | 0.738051 |

|            |           |     |     |   |             |             |          |
|------------|-----------|-----|-----|---|-------------|-------------|----------|
| rs10992251 |           | A/T | 09q | A | 0.207207207 | 0.220720721 | 0.738116 |
| rs2304935  | MS4A6E    | C/T | 11q | C | 0.321428571 | 0.308035714 | 0.738279 |
| rs2291182  | C4orf35   | G/T | 04q | G | 0.084821429 | 0.09375     | 0.738371 |
| rs11923054 | FLJ23049  | C/T | 03q | C | 0.441964286 | 0.428571429 | 0.738664 |
| rs3174040  |           | A/G | 08p | G | 0.200892857 | 0.189189189 | 0.738688 |
| rs2270812  | THG1L     | A/G | 05q | A | 0.330357143 | 0.345454545 | 0.73869  |
| rs7127111  |           | C/T | 11p | C | 0.316964286 | 0.330357143 | 0.738777 |
| rs2282316  | OR6F1     | C/T | 01q | C | 0.234234234 | 0.247706422 | 0.739111 |
| rs7217454  | LOC728073 | C/G | 17q | C | 0.075892857 | 0.085585586 | 0.739189 |
| rs1014866  | FAT4      | A/G | 04q | A | 0.241071429 | 0.25462963  | 0.739247 |
| rs1609746  | C10orf112 | A/C | 10p | C | 0.415178571 | 0.428571429 | 0.739273 |
| rs862709   | ZNF304    | A/G | 19q | A | 0.051020408 | 0.045       | 0.739366 |
| rs7571     | PARP4     | C/G | 13q | C | 0.344339623 | 0.359813084 | 0.739586 |
| rs4370153  | TMEM155   | A/G | 04q | G | 0.15625     | 0.168181818 | 0.739689 |
| rs9317445  |           | C/T | 13q | T | 0.148648649 | 0.162162162 | 0.739902 |
| rs1051858  | ARID4A    | A/G | 14q | G | 0.324324324 | 0.339285714 | 0.739966 |
| rs4072568  | ARNT2     | A/G | 15q | A | 0.200892857 | 0.1875      | 0.740218 |
| rs11070136 | DZIP1     | A/G | 13q | A | 0.3125      | 0.328828829 | 0.740256 |
| rs4388990  | OR6C74    | A/G | 12q | G | 0.301801802 | 0.318181818 | 0.740575 |
| rs1150752  | TNXB      | A/G | 06p | G | 0.09009009  | 0.099099099 | 0.74061  |
| rs608052   | C8orf79   | C/T | 08p | T | 0.218446602 | 0.207920792 | 0.740712 |
| rs2195980  |           | C/T | 19q | C | 0.133928571 | 0.125       | 0.740835 |
| rs7180051  |           | C/T | 15q | T | 0.09375     | 0.102678571 | 0.74099  |
| rs2275687  | HEATR1    | C/T | 01q | T | 0.34375     | 0.355855856 | 0.741029 |
| rs1045861  | CHORDC1   | A/C | 11q | C | 0.292792793 | 0.308035714 | 0.741345 |
| rs7131283  | NYD-SP21  | A/T | 11q | A | 0.290178571 | 0.274774775 | 0.741517 |
| rs4704561  |           | G/T | 05q | T | 0.154205608 | 0.166666667 | 0.742096 |
| rs10777084 | C12orf50  | C/T | 12q | C | 0.107142857 | 0.116071429 | 0.742103 |
| rs2230593  | MST1R     | A/G | 03p | A | 0.080357143 | 0.072072072 | 0.742195 |
| rs2070074  | GALT      | A/G | 09p | G | 0.089285714 | 0.098214286 | 0.742377 |
| rs6092     | SERPINE1  | A/G | 07q | A | 0.080357143 | 0.072072072 | 0.742634 |
| rs3743601  |           | C/G | 16q | C | 0.074766355 | 0.085714286 | 0.742855 |
| rs4333801  | MYOM3     | C/T | 01p | C | 0.424107143 | 0.40625     | 0.743352 |
| rs7928451  | OR10A6    | A/G | 11p | A | 0.439814815 | 0.425925926 | 0.743421 |
| rs7001839  |           | C/T | 08p | T | 0.08490566  | 0.093457944 | 0.743515 |
| rs3822485  |           | A/C | 05q | C | 0.392523365 | 0.407407407 | 0.743522 |
| rs477830   | LUZP1     | C/T | 01p | C | 0.15625     | 0.169642857 | 0.743604 |

|            |                        |     |     |   |             |             |          |
|------------|------------------------|-----|-----|---|-------------|-------------|----------|
| rs2074647  | RGS6                   | C/T | 14q | T | 0.085585586 | 0.094594595 | 0.743722 |
| rs3811047  | IL1F7                  | A/G | 02q | A | 0.328828829 | 0.315315315 | 0.744006 |
| rs922984   | TTN                    | C/T | 02q | T | 0.081081081 | 0.073394495 | 0.744698 |
| rs11155687 |                        | A/G | 06q | A | 0.386363636 | 0.370535714 | 0.744699 |
| rs544864   | DTX4, MPEG1, LOC730916 | A/G | 11q | A | 0.31981982  | 0.304761905 | 0.745025 |
| rs12537344 | ZNF735, LOC730291      | C/T | 07q | C | 0.375       | 0.36036036  | 0.745461 |
| rs211716   | LOC646425              | A/G | 01p | G | 0.410714286 | 0.397321429 | 0.745461 |
| rs279205   | ZNF69                  | A/G | 19p | G | 0.28125     | 0.268181818 | 0.745924 |
| rs9910051  | ATAD5                  | A/T | 17q | T | 0.125       | 0.116071429 | 0.745933 |
| rs10009368 | LOC132430              | C/T | 04q | T | 0.276785714 | 0.290178571 | 0.745954 |
| rs6035037  | C20orf12               | C/T | 20p | T | 0.325892857 | 0.3125      | 0.746093 |
| rs815957   | ECOP, LOC653930        | A/G | 07p | A | 0.285714286 | 0.272321429 | 0.74651  |
| rs1783147  | PKHD1L1                | C/G | 08q | C | 0.357142857 | 0.370535714 | 0.746619 |
| rs1128400  | MECR                   | C/T | 01p | T | 0.116071429 | 0.126126126 | 0.747009 |
| rs1624087  |                        | A/G | 19q | G | 0.463963964 | 0.481818182 | 0.747171 |
| rs7213894  | DNAH2                  | C/T | 17p | C | 0.378378378 | 0.392857143 | 0.747278 |
| rs6786975  |                        | A/G | 03q | G | 0.463963964 | 0.445945946 | 0.747748 |
| rs12445306 |                        | A/G | 16q | G | 0.087628866 | 0.095505618 | 0.747783 |
| rs6597801  | LHPP                   | A/G | 10q | A | 0.102678571 | 0.112612613 | 0.747918 |
| rs4654500  | LOC644357, LOC730715   | C/T | 01p | T | 0.125       | 0.116071429 | 0.748011 |
| rs12461754 | DDX39                  | A/G | 19p | A | 0.107142857 | 0.098214286 | 0.748078 |
| rs6904029  | HCG9                   | A/G | 06p | A | 0.321428571 | 0.306306306 | 0.748174 |
| rs2985441  | LOC730144              | A/G | 01q | G | 0.129464286 | 0.140909091 | 0.748225 |
| rs1909262  |                        | C/T | 11p | T | 0.373873874 | 0.36036036  | 0.748277 |
| rs10849482 | NCAPD2                 | A/G | 12p | A | 0.180555556 | 0.193693694 | 0.748316 |
| rs10838093 | OR51Q1                 | C/T | 11p | C | 0.378378378 | 0.392857143 | 0.74836  |
| rs1801239  | CUBN                   | A/G | 10p | G | 0.075892857 | 0.084821429 | 0.748379 |
| rs2729835  | LACTB                  | C/T | 15q | C | 0.357798165 | 0.344036697 | 0.748393 |
| rs4757986  | OR52E4                 | G/T | 11p | G | 0.241071429 | 0.252252252 | 0.74861  |
| rs2305830  | CEP164                 | C/G | 11q | G | 0.306306306 | 0.318181818 | 0.748767 |
| rs3739989  | SGMS1                  | A/G | 10q | G | 0.222727273 | 0.209821429 | 0.748957 |
| rs7591849  | WDSUB1                 | G/T | 02q | G | 0.410714286 | 0.396396396 | 0.74909  |
| rs7425888  | LOC651758, LOC728768   | A/G | 02q | A | 0.125       | 0.135135135 | 0.749109 |
| rs11196400 | NRAP                   | C/T | 10q | T | 0.138392857 | 0.147321429 | 0.749169 |
| rs3737374  | KIAA1012               | A/G | 18q | G | 0.333333333 | 0.35        | 0.749269 |
| rs4149963  | EXO1                   | C/T | 01q | T | 0.072072072 | 0.080357143 | 0.749675 |

|            |              |     |     |   |             |             |          |
|------------|--------------|-----|-----|---|-------------|-------------|----------|
| rs6684252  |              | C/G | 01p | G | 0.267857143 | 0.256756757 | 0.749967 |
| rs3130257  | WDR46, PFDN6 | C/T | 06p | T | 0.111607143 | 0.103603604 | 0.750065 |
| rs378098   | C20orf185    | C/T | 20q | T | 0.160714286 | 0.148648649 | 0.750127 |
| rs3829078  | CA9          | A/G | 09p | G | 0.108108108 | 0.098214286 | 0.750362 |
| rs5023688  | CD109        | A/G | 06q | A | 0.388392857 | 0.375       | 0.750617 |
| rs2462961  | KRT24        | C/T | 17q | C | 0.4375      | 0.450892857 | 0.750641 |
| rs8181512  | OR52N2       | A/G | 11p | A | 0.455357143 | 0.440909091 | 0.751075 |
| rs10805890 | HEXB         | A/G | 05q | G | 0.225490196 | 0.212765957 | 0.751108 |
| rs2253680  | FASTKD1      | C/T | 02q | T | 0.401785714 | 0.415178571 | 0.751112 |
| rs1445898  | CAPSL        | A/G | 05p | A | 0.436936937 | 0.450892857 | 0.751155 |
| rs714106   | CEACAM21     | A/C | 19q | C | 0.223214286 | 0.234234234 | 0.751333 |
| rs6897932  | IL7R         | C/T | 05p | T | 0.25        | 0.263636364 | 0.751391 |
| rs11760975 |              | C/G | 07q | G | 0.321428571 | 0.308035714 | 0.751433 |
| rs1899     | NDUFAF1      | A/G | 15q | A | 0.272321429 | 0.258928571 | 0.751566 |
| rs1443253  |              | C/G | 15q | G | 0.357142857 | 0.370535714 | 0.751677 |
| rs4696354  | TIGD4        | C/T | 04q | T | 0.357142857 | 0.370535714 | 0.752067 |
| rs2837225  | IGSF5        | A/C | 21q | A | 0.316964286 | 0.301801802 | 0.752172 |
| rs8147     | DNAJB11      | A/G | 03q | G | 0.209090909 | 0.196428571 | 0.752217 |
| rs7526812  | SGIP1        | A/G | 01p | G | 0.166666667 | 0.15625     | 0.752429 |
| rs31208    | FAM71B       | A/G | 05q | G | 0.117117117 | 0.127272727 | 0.752481 |
| rs7645550  | KCNMB3       | C/T | 03q | T | 0.40625     | 0.419642857 | 0.75267  |
| rs241447   | TAP2         | A/G | 06p | G | 0.325892857 | 0.3125      | 0.752686 |
| rs1227049  | CDH23        | C/G | 10q | C | 0.153153153 | 0.165178571 | 0.752735 |
| rs10467770 | CHD8         | C/T | 14q | T | 0.254464286 | 0.267857143 | 0.752772 |
| rs6509138  | ZNF223       | A/C | 19q | C | 0.333333333 | 0.321100917 | 0.752866 |
| rs12672543 |              | A/C | 07q | A | 0.147619048 | 0.138095238 | 0.75356  |
| rs2306916  | SYNE1        | A/T | 06q | A | 0.263392857 | 0.25        | 0.753614 |
| rs2159983  |              | G/T | 19p | G | 0.142857143 | 0.151785714 | 0.753884 |
| rs2457828  | L1TD1        | G/T | 01p | G | 0.186363636 | 0.198198198 | 0.753945 |
| rs2418163  | KIAA0368     | C/T | 09q | C | 0.5         | 0.486607143 | 0.754072 |
| rs688906   | DYNC2H1      | C/T | 11q | T | 0.276785714 | 0.290178571 | 0.754227 |
| rs1626370  | PKP1         | A/G | 01q | A | 0.232142857 | 0.21875     | 0.75423  |
| rs3731824  | ST3GAL5      | A/G | 02p | G | 0.199074074 | 0.210280374 | 0.754399 |
| rs3828161  | SKIP         | A/G | 02q | G | 0.144144144 | 0.135135135 | 0.75454  |
| rs6670599  | EPHA10       | C/T | 01p | T | 0.082568807 | 0.074074074 | 0.754608 |
| rs11243011 | FARS2        | A/G | 06p | G | 0.198198198 | 0.1875      | 0.754907 |
| rs10947690 | MDGA1        | A/G | 06p | G | 0.316326531 | 0.301980198 | 0.755145 |

|            |                  |     |     |   |             |             |          |
|------------|------------------|-----|-----|---|-------------|-------------|----------|
| rs1998206  | ROS1             | A/C | 06q | C | 0.148148148 | 0.13592233  | 0.755282 |
| rs1429505  | OR11K1P          | A/C | 15q | A | 0.263888889 | 0.280373832 | 0.755298 |
| rs4571699  |                  | A/G | 08q | A | 0.125       | 0.135135135 | 0.755667 |
| rs1063499  | C7               | C/G | 05p | C | 0.433035714 | 0.419642857 | 0.755797 |
| rs4785763  |                  | A/C | 16q | A | 0.297297297 | 0.3125      | 0.75583  |
| rs8015313  | C14orf178        | C/T | 14q | T | 0.236607143 | 0.223214286 | 0.755848 |
| rs3750010  | FLJ10324, PAPOLB | A/G | 07p | G | 0.129464286 | 0.138392857 | 0.756006 |
| rs2853699  | CCR8             | C/G | 03p | C | 0.288288288 | 0.3         | 0.756064 |
| rs1885137  | SERPINA11        | G/T | 14q | G | 0.392857143 | 0.379464286 | 0.75617  |
| rs1898882  | DISP2            | C/G | 15q | G | 0.441441441 | 0.427927928 | 0.75626  |
| rs3736946  | ACSL5            | C/T | 10q | C | 0.107142857 | 0.116071429 | 0.756311 |
| rs10247620 | CCDC129          | A/G | 07p | G | 0.21875     | 0.232142857 | 0.756521 |
| rs7945342  |                  | C/T | 11p | C | 0.326732673 | 0.311827957 | 0.756628 |
| rs1805107  | CDX2             | C/T | 13q | C | 0.1875      | 0.175675676 | 0.756787 |
| rs2276922  | DKFZP564J102     | A/G | 04q | A | 0.236607143 | 0.25        | 0.756905 |
| rs3213832  | PZP              | C/T | 12p | T | 0.089285714 | 0.080357143 | 0.756946 |
| rs3129941  | C6orf10          | A/G | 06p | A | 0.196428571 | 0.209090909 | 0.757085 |
| rs12407003 |                  | A/G | 01p | A | 0.094594595 | 0.102678571 | 0.757207 |
| rs10989591 | GRIN3A           | C/T | 09q | T | 0.3125      | 0.324324324 | 0.757376 |
| rs8034911  |                  | A/T | 15q | A | 0.316964286 | 0.331818182 | 0.757447 |
| rs1176744  | HTR3B            | G/T | 11q | G | 0.369369369 | 0.357142857 | 0.757621 |
| rs2366928  | GPR98            | A/G | 05q | G | 0.321428571 | 0.308035714 | 0.757641 |
| rs7305599  | SLC4A8           | A/G | 12q | A | 0.482142857 | 0.468468468 | 0.757689 |
| rs1052437  |                  | G/T | 03q | G | 0.324324324 | 0.339285714 | 0.758103 |
| rs8046001  |                  | C/T | 16p | T | 0.400900901 | 0.388392857 | 0.758129 |
| rs461645   | EMR1             | C/T | 19p | T | 0.214285714 | 0.202702703 | 0.758299 |
| rs12462929 | ZNF468, ZNF320   | C/T | 19q | C | 0.125       | 0.135135135 | 0.758352 |
| rs9503233  | C6orf195         | A/G | 06p | A | 0.202702703 | 0.214285714 | 0.758385 |
| rs486557   | FHAD1            | C/T | 01p | T | 0.304545455 | 0.288990826 | 0.758761 |
| rs2722722  | ZNF228           | A/G | 19q | A | 0.366071429 | 0.379464286 | 0.758831 |
| rs2722723  | ZNF228           | C/G | 19q | C | 0.366071429 | 0.379464286 | 0.758831 |
| rs2805910  | SRGN             | A/G | 10q | G | 0.184684685 | 0.172727273 | 0.758955 |
| rs25754    | ADAMTS12         | A/G | 05p | A | 0.404545454 | 0.419642857 | 0.759235 |
| rs12587697 |                  | A/G | 14q | A | 0.25        | 0.263392857 | 0.759261 |
| rs2291256  | GOLGA3           | A/G | 12q | A | 0.072072072 | 0.080357143 | 0.759347 |
| rs7549215  |                  | A/G | 01q | A | 0.463963964 | 0.477678571 | 0.759509 |
| rs423932   | FRY              | G/T | 13q | T | 0.324324324 | 0.336363636 | 0.759591 |

|            |           |     |     |   |             |             |          |
|------------|-----------|-----|-----|---|-------------|-------------|----------|
| rs3920038  | NID2      | A/C | 14q | C | 0.163636364 | 0.154545455 | 0.760275 |
| rs37984    | GLCC11    | A/G | 07p | A | 0.334862385 | 0.322727273 | 0.76048  |
| rs3742945  | TTC5      | A/G | 14q | A | 0.241071429 | 0.227678571 | 0.760609 |
| rs1144122  | GPR128    | A/G | 03q | G | 0.361607143 | 0.348214286 | 0.760666 |
| rs3177168  | MRPS35    | A/G | 12p | A | 0.151785714 | 0.162162162 | 0.760795 |
| rs1808834  |           | G/T | 03p | T | 0.275229358 | 0.263392857 | 0.760857 |
| rs1679709  | NKAPL     | C/T | 06p | T | 0.138392857 | 0.148648649 | 0.76086  |
| rs7779099  | LMOD2     | C/T | 07q | C | 0.285714286 | 0.297297297 | 0.760938 |
| rs2043112  | RICTOR    | C/T | 05p | T | 0.383928571 | 0.397321429 | 0.761528 |
| rs2879897  | FLJ45530  | A/C | 16q | A | 0.375       | 0.388392857 | 0.761742 |
| rs3742049  | COQ5      | C/T | 12q | T | 0.107142857 | 0.098214286 | 0.761976 |
| rs4371677  | HOPX      | A/G | 04q | A | 0.473214286 | 0.459821429 | 0.762169 |
| rs10401590 |           | A/G | 19q | G | 0.285046729 | 0.297169811 | 0.762189 |
| rs624110   |           | G/T | 11q | T | 0.264150943 | 0.274509804 | 0.762196 |
| rs2316499  | LOC729765 | A/G | 01p | A | 0.205       | 0.195       | 0.762509 |
| rs4459610  | ACE       | A/T | 17q | A | 0.419642857 | 0.433035714 | 0.762881 |
| rs1183768  | SETX      | C/T | 09q | C | 0.148648649 | 0.162037037 | 0.76292  |
| rs3816539  | DHDDS     | A/G | 01p | A | 0.25        | 0.234693878 | 0.763011 |
| rs3733415  | FAT       | A/G | 04q | A | 0.151785714 | 0.162162162 | 0.763034 |
| rs42138    |           | A/G | 16p | A | 0.204545454 | 0.218181818 | 0.763146 |
| rs8109165  | BIRC8     | A/G | 19q | G | 0.495535714 | 0.482142857 | 0.763177 |
| rs12642536 | CCDC98    | C/T | 04q | T | 0.401785714 | 0.387387387 | 0.763356 |
| rs11680855 | LOC728537 | A/G | 02q | G | 0.394495413 | 0.377272727 | 0.763665 |
| rs6867460  |           | A/G | 05q | A | 0.125       | 0.116071429 | 0.763787 |
| rs1201559  | SLC22A10  | A/G | 11q | G | 0.402061856 | 0.389534884 | 0.7638   |
| rs867186   | PROCR     | A/G | 20q | G | 0.111607143 | 0.102678571 | 0.76414  |
| rs1049674  | ASNS      | A/T | 07q | T | 0.297297297 | 0.285714286 | 0.764172 |
| rs90951    | CLEC10A   | A/G | 17p | G | 0.321428571 | 0.334821429 | 0.764351 |
| rs2261167  | NSUN7     | A/G | 04p | A | 0.09375     | 0.102678571 | 0.764368 |
| rs11096955 | TLR10     | A/C | 04p | C | 0.368181818 | 0.354545455 | 0.764868 |
| rs2736654  | GLO1      | A/C | 06p | C | 0.446428571 | 0.459821429 | 0.765283 |
| rs357373   |           | A/G | 07q | G | 0.256756757 | 0.243119266 | 0.76529  |
| rs2151910  | RAET1E    | A/T | 06q | T | 0.241071429 | 0.254464286 | 0.765291 |
| rs2193595  | C14orf174 | A/G | 14q | G | 0.464285714 | 0.477678571 | 0.765651 |
| rs6940     | IFI16     | A/T | 01q | T | 0.125       | 0.133928571 | 0.765712 |
| rs938609   | ACAN      | A/T | 15q | T | 0.328828829 | 0.344036697 | 0.765794 |
| rs11908296 | DDX27     | G/T | 20q | T | 0.182795699 | 0.194117647 | 0.765892 |



|            |                     |     |     |   |             |             |          |
|------------|---------------------|-----|-----|---|-------------|-------------|----------|
| rs4430553  | HELB                | C/T | 12q | T | 0.46875     | 0.481981982 | 0.765942 |
| rs10819364 |                     | C/T | 09q | T | 0.174107143 | 0.163636364 | 0.766131 |
| rs1549509  | LOC340515           | A/G | 09q | G | 0.464285714 | 0.477678571 | 0.766386 |
| rs4569108  |                     | C/G | 13q | G | 0.339285714 | 0.352678571 | 0.766402 |
| rs2789417  | SLAMF9              | A/C | 01q | A | 0.103603604 | 0.094594595 | 0.766516 |
| rs10792156 | OR10W1              | C/T | 11q | T | 0.410714286 | 0.397321429 | 0.766598 |
| rs2980618  | NUDCD1              | C/T | 08q | C | 0.379464286 | 0.366071429 | 0.766634 |
| rs2289953  | TBC1D8              | C/T | 02q | T | 0.339285714 | 0.325892857 | 0.766979 |
| rs758037   | SH3RF2              | C/T | 05q | C | 0.383928571 | 0.370535714 | 0.766998 |
| rs663824   | WDR65               | A/G | 01p | G | 0.386363636 | 0.399038462 | 0.767079 |
| rs3812909  | SCAPER              | A/T | 15q | T | 0.303571429 | 0.290178571 | 0.767236 |
| rs2544773  | RIOK2               | C/G | 05q | C | 0.397321429 | 0.383928571 | 0.767252 |
| rs9834457  |                     | C/T | 03p | C | 0.138392857 | 0.129464286 | 0.767334 |
| rs2243191  | IL19                | C/T | 01q | T | 0.196428571 | 0.204545455 | 0.767514 |
| rs1064204  | SETBP1              | A/C | 18q | A | 0.142857143 | 0.153153153 | 0.767611 |
| rs3770655  | ETAA1               | A/G | 02p | G | 0.274774775 | 0.286363636 | 0.767642 |
| rs8019270  | TBPL2               | C/G | 14q | C | 0.393939394 | 0.407216495 | 0.767723 |
| rs11186425 |                     | A/C | 10q | A | 0.072072072 | 0.064220183 | 0.767836 |
| rs9898     | HRG                 | C/T | 03q | T | 0.325892857 | 0.339285714 | 0.767931 |
| rs3737669  | GPR157              | C/T | 01p | C | 0.433035714 | 0.445945946 | 0.768245 |
| rs3752135  | SIGLEC12            | A/C | 19q | A | 0.126126126 | 0.133928571 | 0.768482 |
| rs7236891  |                     | A/G | 18p | G | 0.383928571 | 0.397321429 | 0.768539 |
| rs3764609  | HIF3A               | A/G | 19q | G | 0.183035714 | 0.196428571 | 0.76869  |
| rs8081382  |                     | A/T | 17q | A | 0.400900901 | 0.415178571 | 0.768927 |
| rs7229278  |                     | G/T | 18q | T | 0.477477478 | 0.490990991 | 0.768965 |
| rs2222648  | ABCA13              | A/G | 07p | G | 0.254464286 | 0.243243243 | 0.768983 |
| rs3745082  |                     | A/C | 18q | A | 0.401785714 | 0.415178571 | 0.769023 |
| rs7653977  | LOC728394           | A/T | 04q | A | 0.309523809 | 0.298076923 | 0.769172 |
| rs2278161  | CNDP2               | A/G | 18q | G | 0.234234234 | 0.245535714 | 0.76931  |
| rs2688500  | LOC440993           | A/C | 03q | A | 0.352678571 | 0.34375     | 0.769457 |
| rs3134031  | TMEM67              | A/G | 08q | A | 0.388392857 | 0.375       | 0.769819 |
| rs1031257  |                     | A/G | 06q | G | 0.310810811 | 0.299107143 | 0.770207 |
| rs7106548  | OTOG                | C/T | 11p | C | 0.431192661 | 0.444954128 | 0.770207 |
| rs2080164  | KIAA1505, LOC641808 | A/G | 07q | A | 0.424107143 | 0.436936937 | 0.77045  |
| rs2306120  | ACBD3               | G/T | 01q | T | 0.388392857 | 0.375       | 0.770724 |
| rs1334576  | RREB1               | C/T | 06p | T | 0.375       | 0.388392857 | 0.770859 |
| rs216450   |                     | A/G | 17q | A | 0.441441441 | 0.455357143 | 0.770884 |

|            |          |     |     |   |             |             |          |
|------------|----------|-----|-----|---|-------------|-------------|----------|
| rs2301524  | MIAT     | C/T | 22q | T | 0.129464286 | 0.138392857 | 0.771251 |
| rs2815413  | CCDC18   | A/C | 01p | A | 0.163636364 | 0.174528302 | 0.771256 |
| rs11191274 | GBF1     | A/G | 10q | A | 0.120535714 | 0.129464286 | 0.771269 |
| rs10837814 | OR51B2   | A/G | 11p | G | 0.414414414 | 0.427927928 | 0.77154  |
| rs7300524  |          | C/T | 12q | T | 0.410714286 | 0.397321429 | 0.771657 |
| rs1736565  |          | C/T | 01q | T | 0.491071429 | 0.495495496 | 0.771685 |
| rs2788478  | WDR60    | A/G | 07q | G | 0.352678571 | 0.339285714 | 0.771945 |
| rs2228213  | HIVEP1   | A/G | 06p | A | 0.373873874 | 0.361607143 | 0.772073 |
| rs11854320 | ZNF774   | A/G | 15q | A | 0.112612613 | 0.122727273 | 0.772187 |
| rs244903   | RARS     | A/G | 05q | G | 0.4375      | 0.450892857 | 0.772246 |
| rs1079610  | OPN4     | C/T | 10q | C | 0.355855856 | 0.34375     | 0.772523 |
| rs2273962  | NCR2     | A/G | 06p | A | 0.252252252 | 0.264150943 | 0.772583 |
| rs2289643  | KIAA0753 | C/T | 17p | C | 0.459821429 | 0.445945946 | 0.772726 |
| rs3180098  |          | G/T | 22q | G | 0.334821429 | 0.321428571 | 0.772771 |
| rs2572023  | OR2AE1   | C/T | 07q | T | 0.472727273 | 0.459821429 | 0.772979 |
| rs7520509  |          | C/G | 01p | G | 0.467592593 | 0.481481482 | 0.773033 |
| rs665977   | C1orf213 | C/T | 01p | C | 0.085585586 | 0.076576577 | 0.773128 |
| rs2288466  | CDH9     | A/G | 05p | A | 0.477678571 | 0.490990991 | 0.773815 |
| rs866484   | IFI16    | C/G | 01q | C | 0.255       | 0.270833333 | 0.773894 |
| rs3812577  | SDCCAG3  | C/T | 09q | T | 0.120535714 | 0.129464286 | 0.773972 |
| rs3948464  | SP110    | C/T | 02q | T | 0.116071429 | 0.107142857 | 0.774043 |
| rs762679   | MCM4     | A/T | 08q | A | 0.125       | 0.116071429 | 0.774607 |
| rs2348049  | AGBL3    | A/T | 07q | A | 0.301801802 | 0.288288288 | 0.774616 |
| rs2291483  | H1FNT    | A/G | 12q | A | 0.200892857 | 0.211711712 | 0.77499  |
| rs10416265 | GPATCH1  | A/G | 19q | G | 0.27027027  | 0.258928571 | 0.775242 |
| rs1550656  |          | A/G | 17p | G | 0.147321429 | 0.157657658 | 0.775507 |
| rs6003     | F13B     | A/G | 01q | G | 0.117117117 | 0.108108108 | 0.775535 |
| rs6537579  |          | A/G | 10q | A | 0.099099099 | 0.108108108 | 0.775568 |
| rs11574595 |          | A/G | 19q | G | 0.308035714 | 0.299107143 | 0.775741 |
| rs2642438  | MOSC1    | A/G | 01q | A | 0.300925926 | 0.288461538 | 0.775772 |
| rs7800072  | SEMA3D   | G/T | 07q | G | 0.303571429 | 0.316513761 | 0.77636  |
| rs7439869  | SMARCAD1 | C/T | 04q | T | 0.405940594 | 0.393939394 | 0.776653 |
| rs869379   |          | C/G | 01q | G | 0.28125     | 0.27027027  | 0.776662 |
| rs3821348  | ANKMY1   | A/C | 02q | A | 0.151785714 | 0.160714286 | 0.776818 |
| rs1468542  | SACM1L   | A/T | 03p | T | 0.330357143 | 0.316964286 | 0.776901 |
| rs220379   | ZNF263   | C/G | 16p | C | 0.229357798 | 0.240384615 | 0.77707  |
| rs2275060  | KIAA1274 | C/T | 10q | T | 0.15625     | 0.165178571 | 0.777101 |

|            |                      |     |     |   |             |             |          |
|------------|----------------------|-----|-----|---|-------------|-------------|----------|
| rs7483027  |                      | C/T | 11q | C | 0.378378378 | 0.366071429 | 0.777443 |
| rs7315731  | SFRS2IP              | A/T | 12q | T | 0.464285714 | 0.450892857 | 0.777778 |
| rs3741659  | CALCOCO1             | A/G | 12q | A | 0.151785714 | 0.163636364 | 0.777846 |
| rs3804010  | KRTAP13-2            | C/G | 21q | C | 0.111607143 | 0.118181818 | 0.777976 |
| rs11854484 | SLC28A2              | C/T | 15q | C | 0.40625     | 0.418918919 | 0.777999 |
| rs6135876  | OTOR                 | C/T | 20p | C | 0.193693694 | 0.183035714 | 0.77833  |
| rs10502001 | MMP7                 | C/T | 11q | T | 0.209821429 | 0.220720721 | 0.778499 |
| rs1052439  |                      | C/T | 03q | C | 0.325892857 | 0.339285714 | 0.77855  |
| rs7309557  | LOC728148, LOC730662 | C/T | 12q | T | 0.09375     | 0.102678571 | 0.778669 |
| rs9289122  | C3orf30              | C/G | 03q | G | 0.455357143 | 0.441441441 | 0.778762 |
| rs3758741  | CSTF3                | A/G | 11p | A | 0.423423423 | 0.40990991  | 0.778818 |
| rs2640785  | EXPH5                | A/T | 11q | A | 0.148648649 | 0.13963964  | 0.779207 |
| rs1227065  | CDH23                | C/T | 10q | T | 0.142857143 | 0.153153153 | 0.779277 |
| rs2653907  |                      | A/G | 01p | A | 0.18018018  | 0.169642857 | 0.779335 |
| rs161704   | IL31RA               | C/T | 05q | T | 0.292792793 | 0.302752294 | 0.779809 |
| rs648802   | PERP                 | C/G | 06q | G | 0.45631068  | 0.475728155 | 0.779932 |
| rs874881   | PADI4                | C/G | 01p | G | 0.464285714 | 0.47706422  | 0.7801   |
| rs3749117  | PLA2R1               | C/T | 02q | C | 0.459459459 | 0.472972973 | 0.780311 |
| rs8032931  | FMN1                 | A/G | 15q | G | 0.414414414 | 0.401785714 | 0.78035  |
| rs2053380  | FLJ14712             | C/T | 07p | C | 0.308035714 | 0.294642857 | 0.780423 |
| rs2280851  |                      | A/G | 08q | A | 0.276785714 | 0.267857143 | 0.780494 |
| rs6870166  | PDZD2                | C/T | 05p | T | 0.36036036  | 0.348214286 | 0.780514 |
| rs2306536  | CHFR                 | C/T | 12q | T | 0.184684685 | 0.175925926 | 0.780553 |
| rs8059048  | FAM38A, LOC348180    | A/G | 16q | G | 0.174107143 | 0.165178571 | 0.780932 |
| rs4539094  |                      | C/T | 01q | C | 0.423423423 | 0.4375      | 0.781078 |
| rs6788438  |                      | C/T | 03q | T | 0.477678571 | 0.464285714 | 0.781124 |
| rs2178004  | MGA                  | A/T | 15q | A | 0.203703704 | 0.191964286 | 0.781254 |
| rs3898634  | OR4C45               | G/T | 11p | T | 0.441964286 | 0.455357143 | 0.781393 |
| rs1051338  | LIPA                 | A/C | 10q | C | 0.295454546 | 0.309090909 | 0.781483 |
| rs2296436  | HPS1                 | A/G | 10q | G | 0.116071429 | 0.107142857 | 0.781563 |
| rs9262     | C12orf29             | C/G | 12q | C | 0.378378378 | 0.390909091 | 0.781868 |
| rs2292927  | COL22A1              | C/T | 08q | T | 0.178571429 | 0.1875      | 0.781928 |
| rs27230    | ZNF434               | A/G | 16p | G | 0.165178571 | 0.174107143 | 0.781933 |
| rs6925344  | COQ3                 | C/T | 06q | T | 0.165137615 | 0.174107143 | 0.782054 |
| rs6835769  | FRAS1                | C/T | 04q | T | 0.486486487 | 0.472727273 | 0.782574 |
| rs1041935  | LGALS8               | C/T | 01q | C | 0.35        | 0.361111111 | 0.782667 |
| rs227653   | CST7                 | A/G | 20p | A | 0.142857143 | 0.133928571 | 0.782936 |

|            |                         |     |     |   |             |             |          |
|------------|-------------------------|-----|-----|---|-------------|-------------|----------|
| rs11879465 | ZNF211                  | C/T | 19q | T | 0.13963964  | 0.130630631 | 0.783088 |
| rs4253325  | KLKB1                   | A/G | 04q | A | 0.125       | 0.116071429 | 0.783117 |
| rs7735338  | SDCCAG10                | C/G | 05q | G | 0.3125      | 0.325892857 | 0.783225 |
| rs12453319 | LOC728073               | C/T | 17q | T | 0.370535714 | 0.357142857 | 0.783257 |
| rs2076305  | MCFD2L                  | G/T | 06p | T | 0.303571429 | 0.315315315 | 0.783292 |
| rs1801282  | PPARG                   | C/G | 03p | G | 0.114678899 | 0.103603604 | 0.783644 |
|            | C6orf100, DASS-381E5.1, |     |     |   |             |             |          |
| rs2071790  | LOC730405               | C/T | 06p | C | 0.5         | 0.486607143 | 0.783646 |
| rs132642   | APOL3                   | A/T | 22q | A | 0.147321429 | 0.138392857 | 0.783968 |
| rs3095726  | ZNF573                  | C/T | 19q | T | 0.208333333 | 0.195876289 | 0.783994 |
| rs10421632 | ZNF805                  | A/G | 19q | G | 0.46875     | 0.455357143 | 0.784072 |
| rs871990   | ZBTB4                   | C/G | 17p | G | 0.121621622 | 0.129464286 | 0.784072 |
| rs3743098  |                         | C/T | 15q | T | 0.348214286 | 0.359090909 | 0.784174 |
| rs6475273  | C9orf138                | A/G | 09p | G | 0.225225225 | 0.213636364 | 0.7844   |
| rs3756987  | RSPH3                   | A/G | 06q | A | 0.117117117 | 0.109090909 | 0.78467  |
| rs7107050  | ALKBH3                  | A/G | 11p | G | 0.254464286 | 0.243243243 | 0.784695 |
| rs1046404  | NT5C3L                  | C/G | 17q | C | 0.252252252 | 0.241071429 | 0.784716 |
| rs2013503  | LOC392221               | A/G | 08q | G | 0.345454546 | 0.331818182 | 0.784831 |
| rs2236293  | C9orf127                | A/G | 09p | A | 0.424107143 | 0.410714286 | 0.784992 |
| rs10180866 | LOC391370, LOC651894    | C/T | 02p | C | 0.428571429 | 0.415178571 | 0.785001 |
| rs607230   | LAMA1                   | C/T | 18p | T | 0.267857143 | 0.279279279 | 0.785021 |
| rs8097425  | SERPINB10               | A/G | 18q | G | 0.21875     | 0.209821429 | 0.785283 |
| rs2233974  | C6orf15                 | C/G | 06p | C | 0.169642857 | 0.18018018  | 0.785351 |
| rs623053   | MOCOS                   | C/T | 18q | C | 0.059090909 | 0.064220183 | 0.7854   |
| rs7148834  |                         | A/G | 14q | G | 0.4375      | 0.450892857 | 0.785422 |
| rs11574633 | ITGAX                   | C/T | 16p | C | 0.133928571 | 0.142857143 | 0.78552  |
| rs10913157 | BAT2D1                  | A/G | 01q | A | 0.126126126 | 0.137614679 | 0.785695 |
| rs4483821  | ADAMTSL3                | A/G | 15q | G | 0.472972973 | 0.486238532 | 0.785831 |
| rs2014596  |                         | C/T | 13q | T | 0.348214286 | 0.361607143 | 0.785951 |
| rs2304934  | MS4A6E                  | C/T | 11q | C | 0.321428571 | 0.310810811 | 0.786019 |
| rs7933807  | OR10A6                  | A/C | 11p | C | 0.4375      | 0.424107143 | 0.786109 |
| rs6954345  |                         | C/G | 07q | C | 0.232142857 | 0.243243243 | 0.786131 |
| rs3753494  | AGL                     | C/T | 01p | T | 0.133928571 | 0.126126126 | 0.786192 |
| rs1060575  | TCTEX1D1                | A/T | 01p | T | 0.116071429 | 0.125       | 0.786234 |
| rs7097295  | AKR1CL1                 | C/T | 10p | T | 0.342857143 | 0.328431373 | 0.786339 |
| rs3811188  | MRPL52                  | A/C | 14q | C | 0.495535714 | 0.491071429 | 0.786354 |
| rs2183573  | BRWD1                   | A/G | 21q | A | 0.422727273 | 0.410714286 | 0.786358 |

|            |          |     |     |   |             |             |          |
|------------|----------|-----|-----|---|-------------|-------------|----------|
| rs9828     | CHMP7    | A/G | 08p | G | 0.49537037  | 0.485714286 | 0.786385 |
| rs2294840  |          | C/T | 06q | C | 0.138392857 | 0.147321429 | 0.786673 |
| rs7746261  | SSR1     | A/G | 06p | G | 0.292929293 | 0.300970874 | 0.786682 |
| rs7250630  | ZNF137   | A/G | 19q | G | 0.216216216 | 0.205357143 | 0.786703 |
| rs9438     | DHX36    | C/G | 03q | C | 0.415178571 | 0.400900901 | 0.78675  |
| rs11763159 |          | A/G | 07p | A | 0.495495496 | 0.491071429 | 0.786789 |
| rs525409   | SPATA21  | C/G | 01p | G | 0.256756757 | 0.245535714 | 0.786801 |
| rs2269961  | SEC14L3  | C/T | 22q | T | 0.203703704 | 0.214953271 | 0.78688  |
| rs6433818  | KIAA1604 | A/T | 02q | A | 0.133928571 | 0.142857143 | 0.787076 |
| rs734784   | KCNS1    | A/G | 20q | G | 0.468468469 | 0.454954955 | 0.787106 |
| rs2241621  | STON2    | A/C | 14q | A | 0.415178571 | 0.427272727 | 0.787134 |
| rs3828740  |          | C/T | 06q | C | 0.410714286 | 0.423423423 | 0.787715 |
| rs12185268 | IMP5     | A/G | 17q | G | 0.192660551 | 0.202702703 | 0.787868 |
| rs947785   |          | G/T | 11q | T | 0.40990991  | 0.397321429 | 0.788003 |
| rs3825491  | MYO16    | C/G | 13q | C | 0.363636364 | 0.353773585 | 0.788211 |
| rs2516542  | MGC16703 | C/T | 22q | T | 0.120535714 | 0.129464286 | 0.788277 |
| rs1966357  | OR10H3   | A/C | 19p | A | 0.254464286 | 0.265765766 | 0.788554 |
| rs2239730  | ZNF215   | C/G | 11p | G | 0.200892857 | 0.209821429 | 0.789166 |
| rs1065457  | CD1E     | A/G | 01q | G | 0.351351351 | 0.339285714 | 0.789652 |
| rs2304071  |          | A/G | 05q | A | 0.45045045  | 0.464285714 | 0.789838 |
| rs3825020  | NYD-SP21 | C/T | 11q | C | 0.36036036  | 0.370535714 | 0.790421 |
| rs8057071  |          | C/T | 16p | T | 0.285714286 | 0.297297297 | 0.790471 |
| rs11049488 | CCDC91   | A/G | 12p | A | 0.290178571 | 0.303571429 | 0.790575 |
| rs6503870  | TEX14    | C/T | 17q | C | 0.34375     | 0.357142857 | 0.790644 |
| rs11211328 | MOBKL2C  | C/T | 01p | T | 0.272321429 | 0.263392857 | 0.790854 |
| rs11077108 | A2BP1    | A/G | 16p | G | 0.238738739 | 0.227678571 | 0.790936 |
| rs860170   | TAS2R16  | A/G | 07q | G | 0.328828829 | 0.339285714 | 0.791125 |
| rs10199975 |          | C/T | 02p | T | 0.440909091 | 0.427927928 | 0.791701 |
| rs7307991  | A2ML1    | A/G | 12p | G | 0.355855856 | 0.34375     | 0.791779 |
| rs2078266  | KIAA0649 | C/T | 09q | T | 0.174107143 | 0.165137615 | 0.791821 |
| rs2824495  | C21orf91 | C/G | 21q | C | 0.195454545 | 0.205607477 | 0.792085 |
| rs929843   | PDXDC2   | G/T | 16q | T | 0.209821429 | 0.21875     | 0.792291 |
| rs4762     | AGT      | C/T | 01q | T | 0.115740741 | 0.122727273 | 0.792367 |
| rs6591700  | OR5D16   | A/G | 11q | A | 0.129464286 | 0.122727273 | 0.792573 |
| rs684535   | CDON     | A/T | 11q | A | 0.292792793 | 0.28125     | 0.79305  |
| rs10178458 | COL4A3   | C/T | 02q | T | 0.171171171 | 0.160714286 | 0.793067 |
| rs1144507  | ZNF202   | A/G | 11q | A | 0.281818182 | 0.27027027  | 0.79331  |

|            |                 |     |     |   |             |             |          |
|------------|-----------------|-----|-----|---|-------------|-------------|----------|
| rs8192341  |                 | A/C | 08p | A | 0.252252252 | 0.263392857 | 0.793364 |
| rs4740412  | LAMC3           | A/G | 09q | A | 0.288288288 | 0.276785714 | 0.793507 |
| rs344140   | SHROOM3         | C/G | 04q | G | 0.225225225 | 0.236607143 | 0.793676 |
| rs1050152  | SLC22A4         | C/T | 05q | T | 0.410714286 | 0.397321429 | 0.793721 |
| rs941590   | SERPINA10       | A/G | 14q | G | 0.454954955 | 0.463302752 | 0.793845 |
| rs1061622  | TNFRSF1B        | G/T | 01p | G | 0.247747748 | 0.258928571 | 0.793939 |
| rs10815215 | C9orf46         | A/G | 09p | A | 0.3         | 0.288288288 | 0.794016 |
| rs4715227  | PKHD1           | C/T | 06p | T | 0.486607143 | 0.473214286 | 0.794441 |
| rs11040799 | OR52W1          | A/T | 11p | T | 0.274774775 | 0.285714286 | 0.794715 |
| rs1667366  |                 | C/T | 19q | T | 0.477678571 | 0.490990991 | 0.794784 |
| rs743582   | PML, LOC652671  | C/G | 15q | C | 0.133928571 | 0.126126126 | 0.794898 |
| rs2994400  |                 | C/T | 14q | T | 0.352678571 | 0.366071429 | 0.795221 |
| rs3204853  | NDUFAF1         | G/T | 15q | T | 0.267857143 | 0.256756757 | 0.795366 |
| rs2296356  | RP11-145H9.1    | A/G | 06p | A | 0.121621622 | 0.129464286 | 0.795397 |
| rs2298831  | AMICA1          | C/T | 11q | C | 0.129464286 | 0.138392857 | 0.7954   |
| rs303997   | NLRP13          | C/T | 19q | T | 0.419642857 | 0.40990991  | 0.795405 |
| rs1052618  | TMEM22          | A/G | 03q | A | 0.309090909 | 0.321428571 | 0.795773 |
| rs373533   | EMR1            | G/T | 19p | T | 0.214285714 | 0.204545455 | 0.796138 |
| rs2232328  | G6PC2           | C/G | 02q | G | 0.120535714 | 0.111607143 | 0.796193 |
| rs1293205  | CDC5L           | A/T | 06p | A | 0.151785714 | 0.142857143 | 0.796275 |
| rs11903403 | CPO             | G/T | 02q | G | 0.477678571 | 0.490990991 | 0.796493 |
| rs917361   | MYH4            | C/T | 17p | C | 0.440909091 | 0.454545454 | 0.796955 |
| rs8072110  | FLJ22222, HEXDC | G/T | 17q | T | 0.096330275 | 0.103603604 | 0.797073 |
| rs12453124 | KRT27           | C/T | 17q | T | 0.151785714 | 0.142857143 | 0.79717  |
| rs745961   | CCDC123         | C/T | 19q | C | 0.321100917 | 0.33490566  | 0.797347 |
| rs2012199  | FCRL5           | C/T | 01q | C | 0.130630631 | 0.121621622 | 0.797517 |
| rs7206333  |                 | A/G | 16q | A | 0.320754717 | 0.306930693 | 0.797593 |
| rs10445337 | MAPT            | C/T | 17q | C | 0.191964286 | 0.200892857 | 0.797922 |
| rs4807     | PDIA6           | A/G | 02p | G | 0.314285714 | 0.301980198 | 0.797955 |
| rs745960   | CCDC123         | A/T | 19q | T | 0.330357143 | 0.34375     | 0.797974 |
| rs4237360  |                 | C/T | 10p | C | 0.245535714 | 0.254464286 | 0.797978 |
| rs1127066  | RBM23           | C/G | 14q | G | 0.299107143 | 0.310810811 | 0.798012 |
| rs11044004 | PIK3C2G         | C/T | 12p | T | 0.419642857 | 0.433035714 | 0.798018 |
| rs3754689  | LCT             | A/G | 02q | A | 0.205357143 | 0.216216216 | 0.798023 |
| rs2822787  |                 | C/T | 21q | T | 0.178571429 | 0.169642857 | 0.798286 |
| rs6707475  | TTC31, CCDC142  | C/T | 02p | T | 0.129464286 | 0.121621622 | 0.798382 |
| rs4926833  |                 | A/G | 01p | G | 0.339285714 | 0.325892857 | 0.798655 |

|            |                      |     |     |   |             |             |          |
|------------|----------------------|-----|-----|---|-------------|-------------|----------|
| rs6779094  | HHLA2                | A/C | 03q | A | 0.245454545 | 0.236607143 | 0.79866  |
| rs2488411  | DENND1B              | C/T | 01q | C | 0.169642857 | 0.178571429 | 0.798666 |
| rs3765101  | PITRM1               | C/G | 10p | G | 0.063063063 | 0.058035714 | 0.798989 |
| rs3753565  | TPR                  | A/G | 01q | A | 0.142857143 | 0.151785714 | 0.799026 |
| rs2884554  | ZNF714               | A/G | 19p | A | 0.120535714 | 0.129464286 | 0.799263 |
| rs10742256 |                      | C/T | 11p | C | 0.391891892 | 0.379464286 | 0.799769 |
| rs1814819  |                      | C/T | 06p | T | 0.165178571 | 0.15625     | 0.799926 |
| rs2412541  | CASC5                | G/T | 15q | G | 0.160714286 | 0.169642857 | 0.800049 |
| rs1704369  | PLA2G4E              | C/T | 15q | T | 0.375       | 0.387387387 | 0.800159 |
| rs3763244  | LOC728360            | C/G | 06q | G | 0.466019418 | 0.480392157 | 0.800389 |
| rs1055207  |                      | A/G | 09q | A | 0.387387387 | 0.379464286 | 0.800554 |
| rs240780   | ASCC3                | C/G | 06q | G | 0.415178571 | 0.428571429 | 0.80083  |
| rs2077181  | PRUNE2               | C/G | 09q | G | 0.147321429 | 0.15625     | 0.801123 |
| rs775882   | NLRP7                | C/T | 19q | T | 0.209821429 | 0.21875     | 0.801229 |
| rs3747532  | CER1                 | C/G | 09p | C | 0.261261261 | 0.27027027  | 0.80133  |
| rs2269700  |                      | C/T | 09q | C | 0.418181818 | 0.40625     | 0.801335 |
| rs814628   | LIPF                 | A/G | 10q | G | 0.169642857 | 0.178571429 | 0.801629 |
| rs665278   | ALG8                 | A/G | 11q | G | 0.263392857 | 0.254464286 | 0.801886 |
| rs1895245  | NMUR2                | G/T | 05q | T | 0.183035714 | 0.192660551 | 0.802211 |
| rs2273866  | PHYHD1               | A/G | 09q | G | 0.414414414 | 0.422727273 | 0.80227  |
| rs724558   | SERPINB10            | C/T | 18q | C | 0.195238095 | 0.185185185 | 0.802333 |
| rs3734313  | IMPG1                | A/G | 06q | A | 0.183035714 | 0.191964286 | 0.80261  |
| rs3744093  | RNF43                | A/G | 17q | G | 0.35        | 0.340909091 | 0.802699 |
| rs3738372  | CAPN2                | G/T | 01q | G | 0.258928571 | 0.25        | 0.802808 |
| rs7762550  | FLJ43763             | G/T | 06p | T | 0.15625     | 0.165178571 | 0.802896 |
| rs9318600  | PARP4                | A/T | 13q | T | 0.13963964  | 0.133928571 | 0.803401 |
| rs1042445  | HRG                  | C/T | 03q | T | 0.252252252 | 0.26146789  | 0.80383  |
| rs9668475  | FAM90A1              | G/T | 12p | G | 0.233944954 | 0.243243243 | 0.803972 |
| rs365605   | SLC22A18, SLC22A18AS | C/T | 11p | C | 0.355855856 | 0.37037037  | 0.804222 |
| rs2072123  | DGCR2                | C/T | 22q | C | 0.373873874 | 0.383928571 | 0.804224 |
| rs2500018  | OR52J3               | A/T | 11p | T | 0.46875     | 0.459821429 | 0.804508 |
| rs2929366  | EFHB                 | C/T | 03p | C | 0.392857143 | 0.379464286 | 0.804948 |
| rs7282201  | C21orf67             | A/G | 21q | A | 0.18018018  | 0.1875      | 0.80534  |
| rs4832242  | POLR1A               | C/G | 02p | G | 0.105504587 | 0.113636364 | 0.805768 |
| rs2072036  | TNN                  | A/G | 01q | A | 0.120535714 | 0.112612613 | 0.806084 |
| rs2217504  |                      | A/G | 09p | A | 0.321428571 | 0.333333333 | 0.806158 |
| rs1062923  | GEMIN4               | C/T | 17p | C | 0.191964286 | 0.183035714 | 0.806188 |

|            |                                    |     |     |   |             |             |          |
|------------|------------------------------------|-----|-----|---|-------------|-------------|----------|
| rs740539   | LOC641942, LOC645183,<br>LOC649525 | C/T | 07q | T | 0.495495495 | 0.490909091 | 0.806262 |
| rs11205303 | MTMR11                             | C/T | 01q | C | 0.383928571 | 0.375       | 0.806487 |
| rs7590653  | TMEM16G                            | A/G | 02q | A | 0.245535714 | 0.236607143 | 0.806544 |
| rs742711   | CHGB                               | C/T | 20p | T | 0.225225225 | 0.236607143 | 0.806717 |
| rs224534   | TRPV1                              | A/G | 17p | A | 0.352678571 | 0.364864865 | 0.806753 |
| rs6581025  | OR6C74                             | A/G | 12q | A | 0.299107143 | 0.310810811 | 0.807177 |
| rs10789501 | CYP4A11, CYP4A22                   | C/T | 01p | C | 0.357142857 | 0.344036697 | 0.807196 |
| rs11569409 |                                    | C/G | 19p | G | 0.21875     | 0.227678571 | 0.807218 |
| rs10798885 |                                    | G/T | 01p | G | 0.388392857 | 0.400900901 | 0.807552 |
| rs1565040  |                                    | A/G | 11p | A | 0.120535714 | 0.113636364 | 0.807639 |
| rs8176746  | ABO                                | A/C | 09q | A | 0.0625      | 0.067567568 | 0.807754 |
| rs1512025  |                                    | A/G | 12q | A | 0.214285714 | 0.223214286 | 0.807895 |
| rs421128   | BDP1                               | C/T | 05q | T | 0.342857143 | 0.331730769 | 0.807979 |
| rs9841174  | SERPINI2                           | C/T | 03q | C | 0.339285714 | 0.330357143 | 0.808285 |
| rs1852450  | LOC729025                          | G/T | 12p | T | 0.423469388 | 0.433673469 | 0.808519 |
| rs2290472  | MATN2                              | C/T | 08q | T | 0.232142857 | 0.223214286 | 0.80882  |
| rs3812178  | CDYL                               | A/G | 06p | G | 0.200892857 | 0.211009174 | 0.809165 |
| rs125555   | MBD1                               | C/G | 18q | G | 0.205357143 | 0.214285714 | 0.80919  |
| rs4796808  | LOC284120                          | G/T | 17q | G | 0.3125      | 0.303571429 | 0.809447 |
| rs2274064  | NCF2                               | C/T | 01q | C | 0.455357143 | 0.446428571 | 0.809623 |
| rs2240234  | KIAA1086                           | C/T | 19p | T | 0.1875      | 0.196428571 | 0.809669 |
| rs6682716  | TTC24                              | A/G | 01q | A | 0.241071429 | 0.25        | 0.809982 |
| rs2296067  | JMJD2C                             | A/G | 09p | A | 0.232142857 | 0.220720721 | 0.810003 |
| rs1833352  |                                    | C/T | 02p | C | 0.410714286 | 0.397321429 | 0.810229 |
| rs9536314  | KL                                 | G/T | 13q | G | 0.160714286 | 0.151785714 | 0.810323 |
| rs3809643  | PRDM7                              | A/C | 16q | C | 0.160714286 | 0.151785714 | 0.810345 |
| rs2275254  | CHIA                               | C/T | 01p | T | 0.445454546 | 0.433035714 | 0.810357 |
| rs9607485  | LOC649179                          | C/T | 22q | T | 0.065420561 | 0.072815534 | 0.81039  |
| rs3761967  | BDP1                               | A/G | 05q | G | 0.490291262 | 0.5         | 0.810851 |
| rs780668   | SLC29A3                            | A/G | 10q | G | 0.245454546 | 0.25462963  | 0.810951 |
| rs2500017  | OR52J3                             | A/G | 11p | A | 0.468181818 | 0.459821429 | 0.811508 |
| rs259028   | ZFYVE16                            | C/T | 05q | T | 0.071428571 | 0.075892857 | 0.811666 |
| rs249038   | ZFYVE16                            | A/G | 05q | A | 0.071428571 | 0.075892857 | 0.811666 |
| rs2297792  | UBQLN4                             | A/G | 01q | A | 0.415178571 | 0.404545454 | 0.811717 |
| rs2062988  | DHTKD1                             | C/G | 10p | C | 0.202702703 | 0.193693694 | 0.811756 |
| rs10455097 | CD109                              | A/C | 06q | A | 0.472972973 | 0.481981982 | 0.812293 |



|            |           |     |     |   |             |             |          |
|------------|-----------|-----|-----|---|-------------|-------------|----------|
| rs3085     | CR1L      | C/T | 01q | C | 0.103603604 | 0.111607143 | 0.81236  |
| rs38440    |           | A/G | 07p | G | 0.190909091 | 0.200892857 | 0.812431 |
| rs1058180  | HIBCH     | A/G | 02q | A | 0.223214286 | 0.214285714 | 0.812481 |
| rs5744751  | POLE      | C/T | 12q | T | 0.094594595 | 0.100917431 | 0.812591 |
| rs3755321  |           | A/G | 02q | G | 0.055555556 | 0.050458716 | 0.813081 |
| rs2093066  | C20orf185 | C/T | 20q | T | 0.160714286 | 0.151785714 | 0.813369 |
| rs3760299  | ZNF286A   | A/G | 17p | G | 0.348214286 | 0.357142857 | 0.81347  |
| rs1034489  | EPB41L5   | C/T | 02q | C | 0.297297297 | 0.308035714 | 0.813543 |
| rs7520453  |           | C/G | 01q | C | 0.103603604 | 0.109090909 | 0.813557 |
| rs874889   | KRT24     | G/T | 17q | T | 0.423423423 | 0.433035714 | 0.81369  |
| rs10773946 | ERC1      | C/G | 12p | C | 0.205357143 | 0.214285714 | 0.813737 |
| rs2986014  | PDCD11    | C/T | 10q | T | 0.379807692 | 0.390909091 | 0.813812 |
| rs7206698  | LOC400499 | C/G | 16p | C | 0.486486486 | 0.476851852 | 0.813815 |
| rs4902176  | KCNH5     | C/T | 14q | T | 0.366071429 | 0.354545455 | 0.814024 |
| rs9309445  |           | G/T | 02p | G | 0.077981651 | 0.071428571 | 0.814177 |
| rs7323     | MTIF3     | C/G | 13q | C | 0.267857143 | 0.259090909 | 0.814293 |
| rs10030475 | CSN1S1    | C/T | 04q | T | 0.410714286 | 0.422727273 | 0.814339 |
| rs11136343 | PARP10    | C/T | 08q | C | 0.352678571 | 0.366071429 | 0.814343 |
| rs8025521  | OR11K1P   | A/T | 15q | A | 0.258928571 | 0.268181818 | 0.814534 |
| rs9549431  |           | A/G | 13q | A | 0.445945946 | 0.454545454 | 0.814876 |
| rs1800437  | GIPR      | C/G | 19q | C | 0.21875     | 0.227678571 | 0.814886 |
| rs9675365  | ANKRD30B  | C/G | 18p | C | 0.486486486 | 0.473214286 | 0.814925 |
| rs3739070  | TRAF3IP1  | A/C | 02q | C | 0.08        | 0.074257426 | 0.815006 |
| rs4659366  |           | A/G | 01p | G | 0.373873874 | 0.361607143 | 0.815186 |
| rs11681642 | ATP6V1B1  | C/T | 02p | C | 0.424107143 | 0.415178571 | 0.815306 |
| rs9690688  | LAMB4     | A/C | 07q | A | 0.053571429 | 0.049107143 | 0.815463 |
| rs10043    | CHCHD2    | G/T | 07p | T | 0.213636364 | 0.205357143 | 0.815654 |
| rs3743598  | ADAT1     | A/C | 16q | A | 0.252293578 | 0.245283019 | 0.815695 |
| rs2030259  | JMJD1A    | C/T | 02p | T | 0.241071429 | 0.232142857 | 0.815844 |
| rs9830734  | VPS8      | A/G | 03q | G | 0.267857143 | 0.279279279 | 0.816032 |
| rs3820439  | RNPEP     | C/T | 01q | T | 0.276785714 | 0.285714286 | 0.81608  |
| rs1280396  | CGNL1     | C/T | 15q | T | 0.163461539 | 0.153846154 | 0.816132 |
| rs2050944  | LARP5     | C/T | 10p | C | 0.174107143 | 0.18018018  | 0.816155 |
| rs1063087  | TMEM159   | A/C | 16p | A | 0.227678571 | 0.21875     | 0.816173 |
| rs1625963  |           | G/T | 19q | T | 0.472972973 | 0.486607143 | 0.816257 |
| rs2275799  | NRAP      | A/G | 10q | A | 0.26146789  | 0.25        | 0.816266 |
| rs2266780  | FMO3      | A/G | 01q | G | 0.178571429 | 0.169642857 | 0.816546 |

|            |             |     |     |   |             |             |          |
|------------|-------------|-----|-----|---|-------------|-------------|----------|
| rs6553229  |             | C/G | 04q | C | 0.118181818 | 0.127272727 | 0.816581 |
| rs6942733  | ZAN         | G/T | 07q | G | 0.245454545 | 0.256756757 | 0.816582 |
| rs7298565  | UBE3B       | A/G | 12q | G | 0.481308411 | 0.471698113 | 0.816614 |
| rs1214464  | LIPK        | C/G | 10q | C | 0.211711712 | 0.220720721 | 0.816686 |
| rs2834167  | IL10RB      | A/G | 21q | G | 0.28125     | 0.272321429 | 0.81675  |
| rs2297773  | KIAA1024    | C/T | 15q | C | 0.209821429 | 0.21875     | 0.816821 |
| rs2076671  | APOL5       | C/T | 22q | T | 0.295454546 | 0.285714286 | 0.816849 |
| rs3765407  | LUZP1       | A/C | 01p | C | 0.159090909 | 0.169642857 | 0.817096 |
| rs7113607  |             | C/T | 11q | C | 0.427184466 | 0.413461538 | 0.817169 |
| rs2066534  | FMO3        | C/G | 01q | G | 0.223214286 | 0.214285714 | 0.817343 |
| rs947847   | CATSPER1    | A/G | 11q | G | 0.283783784 | 0.272321429 | 0.817393 |
| rs1968871  | TREML3      | A/G | 06p | A | 0.178571429 | 0.1875      | 0.817552 |
| rs1047265  | AFF3        | A/G | 02q | G | 0.1875      | 0.196428571 | 0.817644 |
| rs10769272 | OR52E6      | C/G | 11p | C | 0.366071429 | 0.357142857 | 0.817749 |
| rs4362173  | OR52E6      | C/T | 11p | C | 0.366071429 | 0.357142857 | 0.817749 |
| rs4451603  |             | A/G | 01q | A | 0.272321429 | 0.263392857 | 0.817846 |
| rs2242471  | SDAD1       | C/G | 04q | C | 0.366071429 | 0.373873874 | 0.817847 |
| rs2066124  |             | A/C | 10p | A | 0.330357143 | 0.321428571 | 0.818263 |
| rs11164663 | COL11A1     | A/C | 01p | C | 0.072916667 | 0.081632653 | 0.818323 |
| rs4601653  | RP11-49L2.2 | C/G | 10p | C | 0.183035714 | 0.175675676 | 0.818348 |
| rs2302134  | ABCA6       | C/T | 17q | T | 0.373873874 | 0.387387387 | 0.818666 |
| rs2173904  | KIAA0020    | C/G | 09p | C | 0.459821429 | 0.45045045  | 0.818698 |
| rs8074015  | KIAA1618    | A/G | 17q | A | 0.321428571 | 0.331818182 | 0.819103 |
| rs3736032  | SLC25A37    | A/G | 08p | A | 0.058035714 | 0.0625      | 0.819352 |
| rs2278586  | OXER1       | C/G | 02p | C | 0.241071429 | 0.25        | 0.819383 |
| rs2236338  | GZMB        | A/G | 14q | G | 0.256756757 | 0.247747748 | 0.819751 |
| rs6579255  | CPNE1       | C/T | 20q | C | 0.196428571 | 0.205357143 | 0.819756 |
| rs1049874  | ASAH1       | A/G | 08p | A | 0.477678571 | 0.486607143 | 0.819802 |
| rs2303759  | DKKL1       | G/T | 19q | G | 0.263392857 | 0.254464286 | 0.819915 |
| rs1799516  | LOC729025   | A/T | 12p | A | 0.21875     | 0.227678571 | 0.819961 |
| rs6971091  | FAM137A     | A/G | 07q | A | 0.21875     | 0.227678571 | 0.820145 |
| rs3750050  | PTPN12      | A/G | 07q | G | 0.169642857 | 0.162162162 | 0.820203 |
| rs1735641  |             | A/C | 10p | C | 0.234234234 | 0.243243243 | 0.82043  |
| rs641320   | FAIM        | C/T | 03q | T | 0.075892857 | 0.081081081 | 0.82046  |
| rs10264952 | STK31       | A/G | 07p | A | 0.160714286 | 0.153153153 | 0.820467 |
| rs4861066  | NSUN7       | A/G | 04p | G | 0.339285714 | 0.330357143 | 0.820769 |
| rs4936845  | OR6M1       | G/T | 11q | T | 0.263392857 | 0.254464286 | 0.820992 |

|            |               |     |     |   |             |             |          |
|------------|---------------|-----|-----|---|-------------|-------------|----------|
| rs1560099  | ZNF415        | A/G | 19q | G | 0.165178571 | 0.157657658 | 0.821019 |
| rs9740587  |               | A/G | 13q | A | 0.303571429 | 0.292792793 | 0.821032 |
| rs6672420  | RUNX3         | A/T | 01p | T | 0.490990991 | 0.495535714 | 0.82123  |
| rs12471868 | LYCAT         | A/G | 02p | G | 0.130630631 | 0.138392857 | 0.821308 |
| rs2071561  | KRT32         | A/C | 17q | A | 0.477678571 | 0.486486486 | 0.821683 |
| rs2293767  | ZAN           | C/T | 07q | T | 0.316964286 | 0.308035714 | 0.821803 |
| rs550897   | FAM55D        | C/T | 11q | T | 0.490990991 | 0.5         | 0.821858 |
| rs885937   |               | A/T | 06p | T | 0.376146789 | 0.384615385 | 0.821866 |
| rs970547   | COL12A1       | A/G | 06q | G | 0.209821429 | 0.220720721 | 0.822254 |
| rs9508509  |               | C/T | 13q | C | 0.308035714 | 0.318181818 | 0.822278 |
| rs9916475  | KRT37         | A/T | 17q | A | 0.464285714 | 0.472972973 | 0.822284 |
| rs2073670  |               | C/T | 14q | C | 0.355855856 | 0.366071429 | 0.823082 |
| rs7667789  |               | A/G | 04q | G | 0.274774775 | 0.281818182 | 0.823457 |
| rs2270581  | NCKAP1L       | A/G | 12q | A | 0.0625      | 0.058035714 | 0.82363  |
| rs2282192  | C9orf156      | C/T | 09q | T | 0.236607143 | 0.245535714 | 0.823719 |
| rs300124   |               | A/G | 06q | G | 0.191964286 | 0.183035714 | 0.823762 |
| rs6678540  | MYOM3         | A/G | 01p | A | 0.450892857 | 0.458715596 | 0.82377  |
| rs2303914  | TAF1B         | G/T | 02p | T | 0.495283019 | 0.485436893 | 0.823862 |
| rs4601962  |               | A/T | 14q | T | 0.080357143 | 0.085585586 | 0.824019 |
| rs228697   | PER3          | C/G | 01p | G | 0.094594595 | 0.089285714 | 0.824371 |
| rs12645298 | SYNPO2        | C/G | 04q | C | 0.234234234 | 0.243243243 | 0.824456 |
| rs10957393 | CPA6          | A/G | 08q | G | 0.243119266 | 0.252293578 | 0.82456  |
| rs8063528  | LOC400499     | A/C | 16p | C | 0.490990991 | 0.5         | 0.82463  |
| rs1043261  | IL17RB, ACTR8 | C/T | 03p | T | 0.075892857 | 0.081081081 | 0.824633 |
| rs901827   | C11orf24      | C/T | 11q | T | 0.436936937 | 0.427272727 | 0.824961 |
| rs7128017  | HPS5          | G/T | 11p | T | 0.120535714 | 0.112612613 | 0.825304 |
| rs7011     | CINP          | C/T | 14q | T | 0.357142857 | 0.364864865 | 0.82546  |
| rs13846    | CCDC109B      | A/T | 04q | T | 0.322727273 | 0.3125      | 0.826017 |
| rs9349688  | LRRC1         | A/G | 06p | G | 0.126373626 | 0.125       | 0.826089 |
| rs1572912  | TBC1D13       | A/G | 09q | G | 0.321428571 | 0.330275229 | 0.826248 |
| rs11545941 |               | C/G | 07q | G | 0.232142857 | 0.240909091 | 0.826274 |
| rs1047640  | SP3           | A/G | 02q | G | 0.138392857 | 0.145454546 | 0.826612 |
| rs1793426  |               | A/G | 11q | A | 0.359090909 | 0.370535714 | 0.826618 |
| rs1046403  | NT5C3L        | C/T | 17q | C | 0.25        | 0.241071429 | 0.826621 |
| rs11176815 | MUC19         | C/G | 12q | G | 0.227678571 | 0.216216216 | 0.826692 |
| rs7210729  |               | A/C | 17p | A | 0.3125      | 0.321428571 | 0.826854 |
| rs1469087  | ZNF135        | C/T | 19q | C | 0.13963964  | 0.131818182 | 0.826943 |

|            |           |     |     |   |             |             |          |
|------------|-----------|-----|-----|---|-------------|-------------|----------|
| rs8109273  |           | C/T | 19p | C | 0.0625      | 0.067567568 | 0.827011 |
| rs2844697  | LOC646570 | A/G | 06p | A | 0.377272727 | 0.366071429 | 0.827016 |
| rs3931036  | COG4      | C/T | 16q | C | 0.053571429 | 0.049107143 | 0.827031 |
| rs4758258  | OR10A6    | A/G | 11p | A | 0.183035714 | 0.191964286 | 0.827122 |
| rs218369   | C21orf25  | G/T | 21q | G | 0.245454545 | 0.236607143 | 0.827184 |
| rs2275047  | AVPI1     | C/G | 10q | C | 0.40990991  | 0.4         | 0.82739  |
| rs2505323  | PTCHD3    | A/G | 10p | A | 0.299107143 | 0.290178571 | 0.827492 |
| rs3811046  | IL1F7     | G/T | 02q | G | 0.331818182 | 0.323529412 | 0.827521 |
| rs2234962  | BAG3      | C/T | 10q | C | 0.205357143 | 0.214285714 | 0.827543 |
| rs2723880  | KIAA1853  | A/G | 12q | A | 0.34375     | 0.352678571 | 0.827674 |
| rs9873604  | ZNF167    | C/T | 03p | C | 0.30927835  | 0.3         | 0.827721 |
| rs11209026 | IL23R     | A/G | 01p | A | 0.075892857 | 0.081081081 | 0.827829 |
| rs308925   | LOC729777 | C/T | 16q | T | 0.169642857 | 0.162162162 | 0.828066 |
| rs12129691 |           | C/T | 01q | T | 0.22972973  | 0.223214286 | 0.82816  |
| rs941591   | SERPINA10 | A/G | 14q | G | 0.191964286 | 0.200892857 | 0.828398 |
| rs3829405  |           | C/T | 14q | T | 0.169642857 | 0.162162162 | 0.828619 |
| rs2242206  | SLC16A9   | G/T | 10q | T | 0.223214286 | 0.232142857 | 0.828692 |
| rs2308935  |           | A/C | 06p | C | 0.186363636 | 0.192660551 | 0.828783 |
| rs2272007  | ULK4      | A/G | 03p | A | 0.165178571 | 0.155963303 | 0.828894 |
| rs3747881  | SYCE1     | A/G | 10q | G | 0.09375     | 0.100917431 | 0.828904 |
| rs4910755  | OR51B6    | A/C | 11p | C | 0.267857143 | 0.258928571 | 0.828965 |
| rs10428431 | ODZ3      | G/T | 04q | G | 0.129464286 | 0.136363636 | 0.828999 |
| rs10891314 | DLAT      | A/G | 11q | A | 0.378640777 | 0.388888889 | 0.829209 |
| rs1774423  |           | C/G | 16q | C | 0.214285714 | 0.207207207 | 0.829214 |
| rs2230169  | MAP4      | C/G | 03p | C | 0.0625      | 0.058035714 | 0.829309 |
| rs4127353  | OR5B17    | C/T | 11q | T | 0.391304348 | 0.38172043  | 0.829383 |
| rs4675141  | COL4A4    | A/G | 02q | G | 0.495495495 | 0.495535714 | 0.829455 |
| rs435776   | OBSCN     | C/T | 01q | T | 0.486607143 | 0.477678571 | 0.829468 |
| rs4845     | MRPS21    | A/G | 01q | A | 0.0625      | 0.066964286 | 0.829547 |
| rs3747671  | TNK2      | A/G | 03q | A | 0.490909091 | 0.481981982 | 0.829645 |
| rs4796305  |           | G/T | 17p | G | 0.080357143 | 0.085585586 | 0.829697 |
| rs2235967  | ZFYVE26   | C/T | 14q | T | 0.352678571 | 0.34375     | 0.829833 |
| rs10507274 | C12orf49  | C/T | 12q | C | 0.053571429 | 0.049107143 | 0.829855 |
| rs611010   | C11orf1   | A/T | 11q | A | 0.1875      | 0.178571429 | 0.829856 |
| rs2487999  | OBFC1     | C/T | 10q | T | 0.09375     | 0.099099099 | 0.829904 |
| rs1051484  | PREP      | C/T | 06q | T | 0.153153153 | 0.147321429 | 0.830431 |
| rs3742207  | COL4A1    | A/C | 13q | C | 0.392857143 | 0.382882883 | 0.830471 |

|            |                     |     |     |   |             |             |          |
|------------|---------------------|-----|-----|---|-------------|-------------|----------|
| rs9886752  | LCN10               | A/G | 09q | A | 0.168181818 | 0.160714286 | 0.83053  |
| rs7775     | FRZB                | C/G | 02q | G | 0.080357143 | 0.086363636 | 0.830699 |
| rs140528   | FLJ90680            | C/T | 22q | T | 0.084821429 | 0.09009009  | 0.830723 |
| rs2294120  | ZNF34               | C/T | 08q | C | 0.446428571 | 0.4375      | 0.830745 |
| rs6542522  | LOC130355           | C/T | 02q | T | 0.397321429 | 0.386363636 | 0.830812 |
| rs2832129  |                     | C/G | 21q | C | 0.191964286 | 0.183486238 | 0.830847 |
| rs1799811  |                     | C/T | 11q | T | 0.084821429 | 0.09009009  | 0.83101  |
| rs259391   | C6orf103            | A/G | 06q | A | 0.5         | 0.491071429 | 0.83137  |
| rs2150283  | KIAA1549            | C/T | 07q | T | 0.071428571 | 0.066964286 | 0.831499 |
| rs7237030  |                     | A/G | 18p | G | 0.387387387 | 0.397321429 | 0.83152  |
| rs3764795  | GML                 | C/T | 08q | T | 0.053571429 | 0.058035714 | 0.831789 |
| rs10885330 |                     | A/C | 10q | A | 0.486486486 | 0.477477477 | 0.831946 |
| rs7211875  | TADA2L              | C/T | 17q | C | 0.113207547 | 0.106796116 | 0.832116 |
| rs1938637  |                     | C/T | 11q | C | 0.375       | 0.366071429 | 0.832548 |
| rs1535882  | SIRPB1              | C/T | 20p | C | 0.359090909 | 0.369158878 | 0.832587 |
| rs2715687  | GUCA1C              | A/G | 03q | G | 0.274774775 | 0.28125     | 0.83263  |
| rs10917536 | TMCO4               | A/C | 01p | A | 0.366071429 | 0.375       | 0.832668 |
| rs1982963  | NID2                | C/T | 14q | C | 0.241071429 | 0.231818182 | 0.83267  |
| rs2613648  | FLJ43860, LOC731804 | A/G | 08q | A | 0.463636364 | 0.45        | 0.832773 |
| rs1132375  | KIAA0692            | C/T | 12q | T | 0.361607143 | 0.370535714 | 0.832811 |
| rs3178178  | DKFZp762E1312       | A/G | 02q | G | 0.080357143 | 0.085585586 | 0.832925 |
| rs3095089  | LOC646570           | A/C | 06p | A | 0.192307692 | 0.202830189 | 0.833097 |
| rs3742290  | UTP14C, ALG11       | A/G | 13q | G | 0.133928571 | 0.13963964  | 0.833995 |
| rs2929043  | XKR4                | C/T | 08q | T | 0.450892857 | 0.459821429 | 0.834052 |
| rs10500635 |                     | A/G | 11p | A | 0.267857143 | 0.259090909 | 0.834166 |
| rs3740853  | JMJD2D              | A/G | 11q | A | 0.232142857 | 0.223214286 | 0.834531 |
| rs2051542  | HIST1H1T            | C/T | 06p | T | 0.054054054 | 0.05        | 0.834763 |
| rs3812571  | SNAPC4              | C/G | 09q | C | 0.468468468 | 0.459090909 | 0.834796 |
| rs2302427  | EZH2                | C/G | 07q | C | 0.076576577 | 0.071428571 | 0.834901 |
| rs6595440  | CCDC100             | C/G | 05q | C | 0.392857143 | 0.383928571 | 0.834967 |
| rs742682   |                     | G/T | 01p | G | 0.130630631 | 0.125       | 0.835191 |
| rs238238   | ENO3                | A/G | 17p | A | 0.254464286 | 0.263392857 | 0.835281 |
| rs9288513  | PECR                | A/T | 02q | T | 0.089285714 | 0.084821429 | 0.835307 |
| rs4712056  | C6orf142            | A/G | 06p | G | 0.321428571 | 0.31443299  | 0.835326 |
| rs2276054  | LOH11CR2A           | A/C | 11q | A | 0.090909091 | 0.084821429 | 0.835348 |
| rs3772173  | SKIL                | C/T | 03q | C | 0.21875     | 0.209821429 | 0.83535  |
| rs1209879  | COMMD5, LOC642872   | A/G | 08q | A | 0.366071429 | 0.357142857 | 0.835594 |

|            |               |     |     |   |             |             |          |
|------------|---------------|-----|-----|---|-------------|-------------|----------|
| rs7714670  | RGNEF         | C/T | 05q | C | 0.459821429 | 0.450892857 | 0.83581  |
| rs842274   | OXNAD1        | A/C | 03p | C | 0.400943396 | 0.392857143 | 0.835833 |
| rs1047769  | ERCC5         | A/G | 13q | G | 0.058035714 | 0.0625      | 0.836069 |
| rs389600   |               | A/G | 06p | A | 0.21559633  | 0.224770642 | 0.836074 |
| rs7527596  |               | C/T | 01q | T | 0.46875     | 0.477678571 | 0.836377 |
| rs271252   |               | G/T | 05q | T | 0.472727273 | 0.481651376 | 0.836395 |
| rs2824790  | PRSS7         | C/G | 21q | G | 0.294642857 | 0.285714286 | 0.836593 |
| rs2272487  | CHCHD6        | A/C | 03q | A | 0.153153153 | 0.160714286 | 0.836651 |
| rs2291554  | LOC647109     | A/G | 03q | A | 0.058035714 | 0.053571429 | 0.836925 |
| rs4855271  | SI            | C/T | 03q | C | 0.053571429 | 0.058035714 | 0.837043 |
| rs2241797  | TGFBRAP1      | C/T | 02q | T | 0.391891892 | 0.400900901 | 0.837209 |
| rs2394412  |               | A/G | 06p | A | 0.325892857 | 0.316964286 | 0.837745 |
| rs2894046  |               | C/T | 06p | C | 0.325892857 | 0.316964286 | 0.837745 |
| rs1769     | WDR82         | A/G | 03p | G | 0.121621622 | 0.116071429 | 0.837747 |
| rs3821238  | DKFZp762E1312 | C/G | 02q | G | 0.098214286 | 0.103603604 | 0.837993 |
| rs3795958  | C2orf39       | A/G | 02p | G | 0.165178571 | 0.174107143 | 0.838231 |
| rs10808115 |               | A/C | 07q | A | 0.455357143 | 0.463963964 | 0.838334 |
| rs3822109  | DKFZP564O0823 | C/T | 04q | T | 0.401785714 | 0.409090909 | 0.838343 |
| rs1492171  | LOC647109     | C/T | 03q | C | 0.303571429 | 0.294642857 | 0.838463 |
| rs10981890 |               | A/G | 09q | G | 0.455357143 | 0.446428571 | 0.838808 |
| rs367863   | FAT           | C/G | 04q | G | 0.151785714 | 0.144144144 | 0.838934 |
| rs4072111  | IL16          | A/G | 15q | A | 0.108108108 | 0.102678571 | 0.839089 |
| rs734312   | WFS1          | A/G | 04p | G | 0.481818182 | 0.473214286 | 0.839094 |
| rs172956   | ZNF578        | A/C | 19q | A | 0.446428571 | 0.4375      | 0.839287 |
| rs665470   | KRT71         | C/T | 12q | T | 0.227678571 | 0.236607143 | 0.839309 |
| rs7187167  |               | C/T | 16p | T | 0.303571429 | 0.294642857 | 0.839333 |
| rs10152640 | FSIP1         | A/G | 15q | G | 0.290178571 | 0.28125     | 0.839377 |
| rs11806923 |               | C/G | 01p | G | 0.290178571 | 0.299107143 | 0.839412 |
| rs4849167  | PSD4          | C/G | 02q | C | 0.40625     | 0.415178571 | 0.839438 |
| rs10036727 | SLIT3         | C/T | 05q | T | 0.486607143 | 0.477678571 | 0.83958  |
| rs4951168  | TMEM81        | C/T | 01q | C | 0.155660377 | 0.15        | 0.839596 |
| rs3775291  | TLR3          | A/G | 04q | A | 0.292792793 | 0.301801802 | 0.839624 |
| rs3827521  | LOC283398     | G/T | 12q | T | 0.25        | 0.242424242 | 0.839636 |
| rs2272714  |               | C/T | 08q | T | 0.0625      | 0.067567568 | 0.839675 |
| rs1902023  | UGT2B15       | G/T | 04q | G | 0.464285714 | 0.455357143 | 0.839778 |
| rs11170271 | KRT76         | C/T | 12q | T | 0.240740741 | 0.231818182 | 0.83978  |
| rs7927138  | OVCH2         | C/T | 11p | T | 0.383928571 | 0.392857143 | 0.83984  |

|            |              |     |     |   |             |             |          |
|------------|--------------|-----|-----|---|-------------|-------------|----------|
| rs1471997  | H1FNT        | C/T | 12q | T | 0.245535714 | 0.236607143 | 0.840024 |
| rs3734804  | C6orf97      | A/G | 06q | G | 0.46875     | 0.459821429 | 0.840453 |
| rs26618    | ARTS-1       | C/T | 05q | C | 0.272321429 | 0.28125     | 0.840677 |
| rs1361385  | ZSCAN12      | C/T | 06p | C | 0.308035714 | 0.316964286 | 0.841014 |
| rs330261   | FLJ14213     | C/T | 11p | C | 0.103603604 | 0.098214286 | 0.841293 |
| rs6458199  | TREML3       | A/T | 06p | A | 0.178571429 | 0.186363636 | 0.841346 |
| rs401502   | IL12RB1      | C/G | 19p | G | 0.315315315 | 0.322727273 | 0.841808 |
| rs2072045  |              | A/G | 14q | A | 0.361607143 | 0.370535714 | 0.84185  |
| rs6588498  | LOC388630    | A/G | 01p | A | 0.397321429 | 0.387387387 | 0.841918 |
| rs2462684  |              | C/G | 07p | G | 0.225225225 | 0.218181818 | 0.842067 |
| rs11153174 | C6orf185     | C/T | 06q | T | 0.348214286 | 0.339285714 | 0.842748 |
| rs3770214  | ZNF142       | C/T | 02q | T | 0.357142857 | 0.366071429 | 0.842795 |
| rs2072446  | NGFR         | C/T | 17q | T | 0.058035714 | 0.0625      | 0.842804 |
| rs4959786  |              | C/T | 06p | T | 0.200892857 | 0.207207207 | 0.84283  |
| rs1209750  | ANKRD30A     | C/G | 10p | G | 0.46875     | 0.45945946  | 0.842921 |
| rs1524617  |              | C/G | 07q | C | 0.34375     | 0.352678571 | 0.842998 |
| rs1047978  | C21orf91     | C/G | 21q | G | 0.346846847 | 0.357142857 | 0.843118 |
| rs10016614 |              | C/T | 04q | T | 0.205263158 | 0.214285714 | 0.843131 |
| rs3731958  | GTDC1        | A/C | 02q | C | 0.491071429 | 0.5         | 0.843271 |
| rs10838525 | TRIM5        | C/T | 11p | T | 0.388392857 | 0.379464286 | 0.843288 |
| rs13787    | PPA2         | C/G | 04q | G | 0.454954955 | 0.463963964 | 0.843313 |
| rs2686817  | PKD1L1       | A/C | 07p | A | 0.471962617 | 0.458333333 | 0.843321 |
| rs2231940  | FLJ10241     | A/G | 19q | G | 0.373873874 | 0.364864865 | 0.843457 |
| rs10251045 | MUC3B        | C/G | 07q | C | 0.242574257 | 0.25        | 0.843466 |
| rs4862653  | DKFZP564J102 | A/G | 04q | A | 0.129464286 | 0.135135135 | 0.843529 |
| rs3850625  | CACNA1S      | A/G | 01q | A | 0.112612613 | 0.107142857 | 0.844017 |
| rs3886999  | ATRN         | C/T | 20p | T | 0.066964286 | 0.0625      | 0.844142 |
| rs2075803  | SIGLEC9      | A/G | 19q | A | 0.433035714 | 0.441964286 | 0.844226 |
| rs229526   | C1QTNF6      | C/G | 22q | G | 0.222727273 | 0.214285714 | 0.844343 |
| rs869111   | OR2G2        | A/G | 01q | A | 0.491071429 | 0.482142857 | 0.844525 |
| rs29132    | VAPA         | C/T | 18p | C | 0.053571429 | 0.05        | 0.844737 |
| rs4633449  |              | A/C | 11p | A | 0.334821429 | 0.324324324 | 0.844742 |
| rs1008628  | BRF1         | A/G | 14q | G | 0.321428571 | 0.311827957 | 0.844891 |
| rs3501     | PAXIP1       | A/G | 07q | G | 0.294642857 | 0.304545455 | 0.844961 |
| rs736118   | STRA6        | C/T | 15q | T | 0.075892857 | 0.080357143 | 0.845099 |
| rs11250082 |              | C/T | 08p | T | 0.196428571 | 0.205357143 | 0.845221 |
| rs10379    | CSMD2, HMGB4 | G/T | 01p | T | 0.214285714 | 0.223214286 | 0.845377 |

|            |                |     |     |   |             |             |          |
|------------|----------------|-----|-----|---|-------------|-------------|----------|
| rs3745297  | HRC            | A/C | 19q | C | 0.423423423 | 0.415178571 | 0.845472 |
| rs3961613  |                | A/C | 01q | A | 0.259259259 | 0.252252252 | 0.84549  |
| rs12584    | UBR4           | A/T | 01p | A | 0.400900901 | 0.410714286 | 0.845632 |
| rs2819419  | AHNAK2         | A/C | 14q | A | 0.432432432 | 0.422727273 | 0.845758 |
| rs2041607  | GAB4           | A/G | 22q | A | 0.362385321 | 0.371428571 | 0.845814 |
| rs2546216  |                | A/C | 08q | A | 0.075892857 | 0.071428571 | 0.845925 |
| rs4592451  | OR52E6         | A/G | 11p | G | 0.463917526 | 0.456521739 | 0.845971 |
| rs2578500  | KIAA0947       | A/G | 05p | G | 0.313636364 | 0.303571429 | 0.846057 |
| rs543573   | SETX           | C/T | 09q | T | 0.13963964  | 0.147321429 | 0.846082 |
|            | PDXDC1, NTAN1, |     |     |   |             |             |          |
| rs1136001  | LOC730455      | G/T | 16p | T | 0.310810811 | 0.316964286 | 0.846191 |
| rs7194871  | PKD1L2         | G/T | 16q | T | 0.209821429 | 0.216216216 | 0.846292 |
| rs2289642  | KIAA0753       | A/G | 17p | A | 0.431818182 | 0.441964286 | 0.846305 |
| rs1735169  | ZNF7, COMMD5   | A/G | 08q | A | 0.370535714 | 0.379464286 | 0.846497 |
| rs2239785  | APOL1          | A/G | 22q | G | 0.207207207 | 0.214285714 | 0.846647 |
| rs10896563 | OR5AK2         | G/T | 11q | T | 0.077272727 | 0.072072072 | 0.846676 |
| rs2297879  | C9orf100       | A/G | 09p | G | 0.300925926 | 0.310185185 | 0.846676 |
| rs3803824  | KIF2B          | C/T | 17q | T | 0.40990991  | 0.400900901 | 0.846713 |
| rs2034648  | CENTG2         | C/T | 02q | C | 0.481981982 | 0.490740741 | 0.846949 |
| rs2832731  |                | A/G | 21q | G | 0.076576577 | 0.072072072 | 0.84719  |
| rs573212   | FBP2           | C/G | 09q | C | 0.122727273 | 0.129464286 | 0.847191 |
| rs4941543  | LCP1           | C/T | 13q | T | 0.108108108 | 0.102678571 | 0.8473   |
| rs2578377  | C5orf3         | C/T | 05q | C | 0.4         | 0.390625    | 0.847312 |
| rs1908946  | LRMP           | C/G | 12p | C | 0.459821429 | 0.468181818 | 0.847348 |
| rs676210   | APOB           | A/G | 02p | A | 0.232142857 | 0.223214286 | 0.84738  |
| rs8042811  | C15orf21       | C/T | 15q | C | 0.15        | 0.142857143 | 0.847463 |
| rs3732765  | P2RY12, MED12L | A/G | 03q | A | 0.352678571 | 0.34375     | 0.847557 |
| rs6716834  | LRP2           | C/T | 02q | C | 0.3125      | 0.303571429 | 0.847654 |
| rs12538876 | LMOD2          | A/C | 07q | A | 0.464285714 | 0.473214286 | 0.847734 |
| rs6824965  | PALLD          | A/G | 04q | A | 0.212121212 | 0.22        | 0.847958 |
| rs11247933 | ZNF683         | A/C | 01p | A | 0.357142857 | 0.366071429 | 0.847985 |
| rs2355466  | OTOG           | A/G | 11p | A | 0.375       | 0.366071429 | 0.848228 |
| rs7787814  | MGC87042       | C/T | 07p | C | 0.071428571 | 0.076576577 | 0.848258 |
| rs808802   |                | A/G | 03q | G | 0.40625     | 0.397321429 | 0.848311 |
| rs6060750  | C20orf152      | C/T | 20q | T | 0.21875     | 0.211711712 | 0.848447 |
| rs2498982  | INADL          | C/G | 01p | C | 0.414414414 | 0.424107143 | 0.848553 |
| rs7931261  | OR5R1          | A/G | 11q | G | 0.25        | 0.258928571 | 0.848602 |



|            |                  |     |     |   |             |             |          |
|------------|------------------|-----|-----|---|-------------|-------------|----------|
| rs7933772  | OR5R1            | C/T | 11q | C | 0.25        | 0.258928571 | 0.848602 |
| rs3116856  | OR2J2            | C/T | 06p | T | 0.431818182 | 0.441964286 | 0.848831 |
| rs2137365  |                  | C/G | 01p | C | 0.138888889 | 0.146226415 | 0.848945 |
| rs2476601  | PTPN22           | A/G | 01p | A | 0.089285714 | 0.084821429 | 0.849028 |
| rs2302190  | MTMR4            | C/T | 17q | C | 0.240909091 | 0.245454545 | 0.849161 |
| rs2306392  | MDM1             | A/G | 12q | A | 0.320754717 | 0.311926605 | 0.849163 |
| rs3851294  | RIPK5            | A/G | 01q | A | 0.098214286 | 0.09375     | 0.849171 |
| rs7863519  | SVEP1            | G/T | 09q | G | 0.214285714 | 0.205357143 | 0.849181 |
| rs9262138  | DHX16            | C/T | 06p | C | 0.0625      | 0.058035714 | 0.849201 |
| rs3749598  | FSTL5            | G/T | 04q | T | 0.102678571 | 0.098214286 | 0.849224 |
| rs11149631 | ADAD2, LOC654780 | C/G | 16q | C | 0.3125      | 0.321428571 | 0.849256 |
| rs1344642  | STK36            | A/G | 02q | A | 0.410714286 | 0.419642857 | 0.849375 |
| rs1060622  | TMED5            | C/T | 01p | C | 0.348623853 | 0.357142857 | 0.849516 |
| rs4741510  | C9orf93          | A/T | 09p | A | 0.425925926 | 0.418181818 | 0.849567 |
| rs7279064  | IFNAR2           | G/T | 21q | G | 0.303571429 | 0.3125      | 0.849854 |
| rs1045922  | RNASE6           | A/G | 14q | A | 0.227678571 | 0.220720721 | 0.850168 |
| rs1573129  | CGN              | C/T | 01q | T | 0.166666667 | 0.159090909 | 0.850284 |
| rs6701295  |                  | C/T | 01q | C | 0.400900901 | 0.390909091 | 0.850442 |
| rs6672147  |                  | A/G | 01q | G | 0.211711712 | 0.21559633  | 0.850563 |
| rs608433   | ZNF236           | C/T | 18q | T | 0.053571429 | 0.049107143 | 0.850563 |
| rs2305535  | DPP3             | C/T | 11q | T | 0.223214286 | 0.22972973  | 0.850596 |
| rs13815    | MCAT             | C/G | 22q | C | 0.361607143 | 0.352678571 | 0.850873 |
| rs3814281  | WHDC1            | C/T | 15q | T | 0.075892857 | 0.080357143 | 0.85088  |
| rs2994401  |                  | A/T | 14q | T | 0.355855856 | 0.366071429 | 0.851305 |
| rs3762685  | PLSCR4           | A/G | 03q | G | 0.357142857 | 0.348214286 | 0.851393 |
| rs2034528  | C12orf64         | C/T | 12q | T | 0.080357143 | 0.084821429 | 0.851751 |
| rs2306894  | CLEC1A           | C/G | 12p | G | 0.136363636 | 0.142857143 | 0.851929 |
| rs2642839  |                  | A/G | 04q | G | 0.454954955 | 0.45        | 0.851936 |
| rs4071641  |                  | A/G | 17q | A | 0.4375      | 0.446428571 | 0.852099 |
| rs35249    |                  | C/T | 05p | T | 0.379464286 | 0.388392857 | 0.852175 |
| rs7506550  |                  | C/T | 18q | T | 0.148648649 | 0.154545455 | 0.852252 |
| rs1127717  | ALDH1L1          | A/G | 03q | G | 0.214285714 | 0.207207207 | 0.852435 |
| rs584855   | C20orf86         | A/G | 20q | G | 0.094594595 | 0.089285714 | 0.852613 |
| rs2234636  | SLC39A2          | C/T | 14q | C | 0.334821429 | 0.325892857 | 0.853096 |
| rs4406360  | UNQ9391          | C/T | 08p | T | 0.330357143 | 0.321428571 | 0.85332  |
| rs998532   | TTF2             | A/G | 01p | A | 0.377358491 | 0.384615385 | 0.85335  |
| rs7127229  |                  | C/T | 11p | C | 0.375       | 0.366071429 | 0.853455 |

|            |                  |     |     |   |             |             |          |
|------------|------------------|-----|-----|---|-------------|-------------|----------|
| rs2479383  |                  | C/T | 01q | C | 0.151515151 | 0.158415842 | 0.853532 |
| rs12174349 | LATS1, LOC645967 | A/G | 06q | A | 0.366972477 | 0.357798165 | 0.853757 |
| rs1617167  |                  | A/G | 11q | A | 0.145454545 | 0.151785714 | 0.854026 |
| rs2307492  | FMO2             | C/T | 01q | C | 0.071428571 | 0.075892857 | 0.854101 |
| rs11102001 | EPS8L3           | A/G | 01p | A | 0.058035714 | 0.0625      | 0.854262 |
| rs13394    | PIH1D1           | C/T | 19q | C | 0.243243243 | 0.236607143 | 0.854471 |
| rs4598671  | OR4C12           | G/T | 11p | G | 0.383928571 | 0.392857143 | 0.854503 |
| rs4131590  |                  | A/T | 11p | T | 0.136363636 | 0.129464286 | 0.854509 |
| rs11036815 | OR51B2           | A/G | 11p | A | 0.315315315 | 0.309090909 | 0.854637 |
| rs2272464  | LOC339778        | A/G | 02p | A | 0.284313725 | 0.289215686 | 0.854913 |
| rs4986791  | TLR4             | C/T | 09q | T | 0.063063063 | 0.058035714 | 0.854946 |
| rs1827210  | MT1M             | A/C | 16q | C | 0.102678571 | 0.107142857 | 0.855003 |
| rs4141841  |                  | A/G | 05q | G | 0.418918919 | 0.429906542 | 0.855168 |
| rs4902379  |                  | C/T | 14q | T | 0.058035714 | 0.053571429 | 0.855229 |
| rs2266782  | FMO3             | A/G | 01q | A | 0.396396396 | 0.387387387 | 0.855506 |
| rs10904576 | LARP5            | C/G | 10p | G | 0.198198198 | 0.205357143 | 0.855592 |
| rs4939208  | OR5B17           | A/T | 11q | A | 0.377272727 | 0.369369369 | 0.855594 |
| rs1148275  |                  | A/G | 10p | G | 0.09375     | 0.089285714 | 0.855609 |
| rs1208606  | ZNF25            | A/C | 10p | C | 0.09375     | 0.089285714 | 0.855609 |
| rs8112275  | LOC728630        | C/G | 19q | G | 0.135135135 | 0.129464286 | 0.855626 |
| rs2075252  | LRP2             | A/G | 02q | A | 0.263392857 | 0.256756757 | 0.855691 |
| rs343320   | PLSCR1           | C/T | 03q | T | 0.080357143 | 0.075892857 | 0.855732 |
| rs1952808  |                  | A/G | 14q | G | 0.193693694 | 0.2         | 0.85574  |
| rs2289520  | SERPINB5         | C/G | 18q | C | 0.066964286 | 0.063063063 | 0.855898 |
| rs2734705  | CLCA1            | A/G | 01p | A | 0.135135135 | 0.12962963  | 0.85599  |
| rs2053724  | DPP10            | C/G | 02q | C | 0.371559633 | 0.364864865 | 0.856002 |
| rs2021349  |                  | A/G | 20p | G | 0.333333333 | 0.325892857 | 0.85611  |
| rs7986131  | LMO7             | C/T | 13q | T | 0.268181818 | 0.277272727 | 0.856233 |
| rs1851725  | OR13C5           | C/T | 09q | C | 0.178571429 | 0.183035714 | 0.856398 |
| rs1453544  | OR4D6            | C/T | 11q | C | 0.3125      | 0.303571429 | 0.856477 |
| rs10486180 | COL28A1          | C/T | 07p | C | 0.0625      | 0.058558559 | 0.856525 |
| rs14008    | TACSTD2          | A/C | 01p | A | 0.087962963 | 0.092592593 | 0.856792 |
| rs3752199  | ZNF317           | G/T | 19p | T | 0.212264151 | 0.203125    | 0.856839 |
| rs2986035  | FAM26A           | C/T | 10q | C | 0.25        | 0.241071429 | 0.856902 |
| rs7792851  |                  | A/G | 07p | G | 0.21875     | 0.225225225 | 0.85693  |
| rs7982418  |                  | A/G | 13q | G | 0.202702703 | 0.211711712 | 0.857132 |
| rs3809813  | KIAA1787         | C/G | 17p | G | 0.127272727 | 0.133928571 | 0.85748  |

|            |                      |     |     |   |             |             |          |
|------------|----------------------|-----|-----|---|-------------|-------------|----------|
| rs1057251  | MOCOS                | C/T | 18q | C | 0.138392857 | 0.133928571 | 0.857565 |
| rs185819   | TNXB                 | C/T | 06p | T | 0.482142857 | 0.473214286 | 0.857634 |
| rs1443417  | KIAA0753             | C/T | 17p | T | 0.428571429 | 0.4375      | 0.857729 |
| rs11643718 | SLC12A3              | A/G | 16q | A | 0.102678571 | 0.107142857 | 0.857823 |
| rs328      | LPL                  | C/G | 08p | G | 0.098214286 | 0.102678571 | 0.857824 |
| rs259956   | C20orf174            | C/T | 20q | T | 0.463963964 | 0.455357143 | 0.858177 |
| rs3749298  | PHLDB2               | C/T | 03q | T | 0.089285714 | 0.084821429 | 0.858501 |
| rs6952329  |                      | C/G | 07p | G | 0.477477478 | 0.46875     | 0.858571 |
| rs5743291  | NOD2                 | A/G | 16q | A | 0.090909091 | 0.094594595 | 0.858731 |
| rs2192828  | FLJ14712             | G/T | 07p | T | 0.425925926 | 0.418181818 | 0.858954 |
| rs2270655  | MMAA                 | C/G | 04q | C | 0.058035714 | 0.054054054 | 0.859072 |
| rs7030550  |                      | A/G | 09q | G | 0.066964286 | 0.071428571 | 0.859241 |
| rs1205434  | RP5-1054A22.3        | A/C | 20q | A | 0.388392857 | 0.379464286 | 0.859699 |
| rs7932738  | LOC646754, LOC652433 | A/C | 11p | C | 0.13963964  | 0.145454546 | 0.859719 |
| rs2275420  | C9orf100, CCDC107    | A/G | 09p | A | 0.13963964  | 0.133928571 | 0.859869 |
| rs1049550  | ANXA11               | C/T | 10q | T | 0.410714286 | 0.404545455 | 0.860038 |
| rs136175   | APOL1                | A/G | 22q | G | 0.200892857 | 0.207207207 | 0.860179 |
| rs2240694  |                      | C/T | 05q | C | 0.418918919 | 0.428571429 | 0.860185 |
| rs11633606 | FLJ43276             | G/T | 15q | T | 0.428571429 | 0.4375      | 0.860407 |
| rs3742935  | AHNAK2               | C/G | 14q | C | 0.436936937 | 0.428571429 | 0.860669 |
| rs2073214  | PHACTR2              | C/T | 06q | T | 0.142857143 | 0.135416667 | 0.86085  |
| rs2250242  | AKNA                 | A/G | 09q | G | 0.445945946 | 0.436936937 | 0.861026 |
| rs2658658  | KRT82                | A/G | 12q | G | 0.486238532 | 0.495327103 | 0.861118 |
| rs2295000  | DIDO1                | A/G | 20q | A | 0.15625     | 0.162162162 | 0.861173 |
| rs2290878  | NCOA2                | A/G | 08q | G | 0.063063063 | 0.059090909 | 0.861176 |
| rs6674281  | TEDDM1               | A/G | 01q | A | 0.450892857 | 0.459821429 | 0.861262 |
| rs3743771  | CHD9                 | A/G | 16q | G | 0.330357143 | 0.321428571 | 0.861548 |
| rs7738586  |                      | A/C | 06p | A | 0.075892857 | 0.072072072 | 0.861607 |
| rs130067   | CCHCR1               | A/C | 06p | C | 0.186363636 | 0.190909091 | 0.861794 |
| rs1985918  |                      | A/C | 22q | C | 0.151376147 | 0.157407407 | 0.861829 |
| rs609521   | TOR1AIP1             | C/G | 01q | C | 0.369369369 | 0.375       | 0.86203  |
| rs1799822  | CPT2, C1orf123       | A/G | 01p | G | 0.212962963 | 0.219047619 | 0.862047 |
| rs760287   | LOC730007            | C/T | 14q | T | 0.297297297 | 0.303571429 | 0.862117 |
| rs4917152  | ABCA13               | A/G | 07p | G | 0.111607143 | 0.116071429 | 0.86232  |
| rs6667999  | LOC127602            | A/G | 01q | G | 0.468468469 | 0.459821429 | 0.862339 |
| rs4247059  |                      | A/G | 15q | A | 0.222727273 | 0.228971963 | 0.862768 |
| rs2241764  | GPR39                | A/G | 02q | A | 0.366071429 | 0.373873874 | 0.862775 |

|            |                      |     |     |   |             |             |             |          |
|------------|----------------------|-----|-----|---|-------------|-------------|-------------|----------|
| rs3740231  | MYO3A                | A/T | 10p | A | 0.459821429 | 0.450892857 | 0.862824    |          |
| rs915877   | TMEM1                | G/T | 21q | G | 0.067567568 | 0.063636364 | 0.862902    |          |
| rs3742302  | USPL1                | C/T | 13q | T | 0.397321429 | 0.388392857 | 0.863063    |          |
| rs7984952  | USPL1                | C/T | 13q | C | 0.397321429 | 0.388392857 | 0.863063    |          |
| rs6952125  | MGC12966             | C/T | 07p | T | 0.477678571 | 0.46875     | 0.8631      |          |
| rs9350     | EXO1                 | C/T | 01q | T | 0.165178571 | 0.160714286 | 0.863271    |          |
| rs2073151  | OR12D2               | C/T | 06p | T | 0.419642857 | 0.428571429 | 0.863286    |          |
| rs2241988  | 2'-PDE               | A/G | 03p | A | 0.490990991 | 0.482142857 | 0.863426    |          |
| rs1054485  | ZNF415               | A/C | 19q | C | 0.486607143 | 0.495535714 | 0.86345     |          |
| rs377483   | LOC728816, LOC732141 | C/T | 21q | C | 0.397321429 | 0.388392857 | 0.863691    |          |
| rs2851096  |                      | A/C | 11q | A | 0.146226415 | 0.150943396 | 0.863791    |          |
| rs2392572  | AMPH                 | C/T | 07p | C | 0.09009009  | 0.084821429 | 0.863912    |          |
| rs1882800  |                      | A/T | 08p | T |             | 0.2         | 0.207207207 | 0.863933 |
| rs7305779  | OR9K2                | A/C | 12q | C |             | 0.3125      | 0.306306306 | 0.863937 |
| rs2708742  | ZNF761               | C/T | 19q | T | 0.446428571 | 0.4375      | 0.863971    |          |
| rs8010699  | SYNE2                | A/G | 14q | A | 0.148648649 | 0.144144144 | 0.863992    |          |
| rs136176   | APOL1                | A/G | 22q | G | 0.205357143 | 0.211711712 | 0.864158    |          |
| rs8192639  |                      | C/G | 12q | G | 0.097826087 | 0.097701149 | 0.864234    |          |
| rs10883100 | HPSE2                | A/T | 10q | T | 0.495495496 | 0.486607143 | 0.864242    |          |
| rs959952   | LOC647166, LOC652259 | A/G | 13q | A |             | 0.34375     | 0.351351351 | 0.864296 |
| rs2232700  | SERPINA10            | A/T | 14q | T | 0.193693694 | 0.200892857 | 0.864319    |          |
| rs2288347  | C14orf145            | C/T | 14q | T |             | 0.5         | 0.490909091 | 0.864355 |
| rs2681417  | CD86                 | A/G | 03q | G | 0.084821429 | 0.080357143 | 0.864416    |          |
| rs1573496  | ADH7                 | C/G | 04q | G | 0.102678571 | 0.107142857 | 0.864638    |          |
| rs4709715  |                      | G/T | 06q | G | 0.459821429 | 0.467889908 | 0.864734    |          |
| rs2732481  | ZNF641               | G/T | 12q | G | 0.346846847 | 0.354545454 | 0.864968    |          |
| rs11928683 |                      | C/T | 03q | C | 0.111607143 | 0.116071429 | 0.865146    |          |
| rs11071896 | ZWILCH               | A/G | 15q | G | 0.283783784 | 0.276785714 | 0.865149    |          |
| rs9511510  | CENPJ                | G/T | 13q | T | 0.135135135 | 0.127272727 | 0.865216    |          |
| rs2677879  | METTL4               | A/C | 18p | C | 0.342342342 | 0.336363636 | 0.865356    |          |
| rs7302981  | LASS5                | A/G | 12q | A | 0.410714286 | 0.401785714 | 0.86548     |          |
| rs306496   | NLRP8                | A/G | 19q | A | 0.473214286 | 0.477678571 | 0.865513    |          |
| rs10082391 | MKI67                | C/T | 10q | C | 0.169642857 | 0.174107143 | 0.865658    |          |
| rs2240     | MKI67                | C/G | 10q | C | 0.169642857 | 0.174107143 | 0.865658    |          |
| rs10826469 |                      | C/T | 10p | T | 0.131818182 | 0.126126126 | 0.865686    |          |
| rs1671152  | GP6                  | G/T | 19q | T | 0.136363636 | 0.142201835 | 0.865781    |          |
| rs4487219  |                      | A/C | 03q | A | 0.147368421 | 0.142156863 | 0.865912    |          |

|            |           |     |     |   |             |             |          |
|------------|-----------|-----|-----|---|-------------|-------------|----------|
| rs12131454 |           | A/G | 01p | G | 0.419642857 | 0.410714286 | 0.866328 |
| rs1609860  | STAB2     | A/C | 12q | A | 0.099099099 | 0.09375     | 0.866368 |
| rs2293669  | WDR35     | C/T | 02p | T | 0.09375     | 0.089285714 | 0.866539 |
| rs144848   | BRCA2     | G/T | 13q | G | 0.268181818 | 0.26146789  | 0.866985 |
| rs1291602  | RAPGEF6   | C/T | 05q | T | 0.153153153 | 0.160714286 | 0.867065 |
| rs1432273  | TTC21B    | C/T | 02q | C | 0.401785714 | 0.410714286 | 0.867123 |
| rs4619784  | FLJ23049  | A/T | 03q | A | 0.433035714 | 0.427927928 | 0.867319 |
| rs4519083  | OVCH2     | A/T | 11p | A | 0.142857143 | 0.147321429 | 0.86735  |
| rs3116818  |           | G/T | 06p | T | 0.495535714 | 0.495535714 | 0.867389 |
| rs10496192 | ALMS1     | C/T | 02p | C | 0.204545454 | 0.198198198 | 0.867417 |
| rs4972946  | SP140     | A/G | 02q | G | 0.103773585 | 0.097087379 | 0.867475 |
| rs2874103  | OR4E2     | A/G | 14q | G | 0.204545455 | 0.211711712 | 0.867612 |
| rs4802965  | ZNF578    | A/G | 19q | G | 0.254464286 | 0.261261261 | 0.867686 |
| rs3761966  | BDP1      | C/T | 05q | T | 0.369369369 | 0.361607143 | 0.867857 |
| rs644827   | SLC44A4   | C/T | 06p | T | 0.410714286 | 0.418918919 | 0.867917 |
| rs2391199  | EVI5      | A/G | 01p | A | 0.107142857 | 0.102678571 | 0.867997 |
| rs1551886  | ALDH3B2   | C/T | 11q | T | 0.085585586 | 0.09009009  | 0.868001 |
| rs272128   | GPR148    | G/T | 02q | T | 0.075892857 | 0.071428571 | 0.868045 |
| rs6925151  | RAET1E    | C/T | 06q | T | 0.254464286 | 0.261261261 | 0.868289 |
| rs962976   | MDM1      | A/G | 12q | G | 0.303571429 | 0.297297297 | 0.868447 |
| rs6602966  | OR11K1P   | C/T | 15q | C | 0.281818182 | 0.288288288 | 0.86866  |
| rs1877609  |           | C/G | 04q | C | 0.252252252 | 0.258928571 | 0.868761 |
| rs2240696  |           | C/T | 05q | T | 0.415178571 | 0.424107143 | 0.868798 |
| rs586024   | GPR116    | C/T | 06p | C | 0.075892857 | 0.071428571 | 0.868817 |
| rs10865030 | MRPL30    | C/T | 02q | T | 0.120535714 | 0.116071429 | 0.868919 |
| rs1039898  | OBSL1     | A/G | 02q | G | 0.102678571 | 0.107142857 | 0.868942 |
| rs3742578  | EXOC5     | C/T | 14q | T | 0.129464286 | 0.125       | 0.869045 |
| rs7813708  | FAM83A    | A/G | 08q | A | 0.172727273 | 0.178571429 | 0.869179 |
| rs897945   | THAP9     | A/C | 04q | C | 0.477477478 | 0.46875     | 0.869259 |
| rs299163   | NLRP11    | G/T | 19q | G | 0.071428571 | 0.075892857 | 0.869593 |
| rs6938396  | LOC401233 | C/G | 06p | G | 0.192307692 | 0.184466019 | 0.869643 |
| rs2381612  |           | C/G | 09p | C | 0.107142857 | 0.111607143 | 0.86968  |
| rs6720173  | ABCG5     | C/G | 02p | C | 0.160714286 | 0.166666667 | 0.869703 |
| rs2269650  | KIAA0040  | A/C | 01q | A | 0.361607143 | 0.352678571 | 0.869833 |
| rs10499053 |           | A/G | 06q | G | 0.351351351 | 0.34375     | 0.869843 |
| rs1048944  | RAI14     | G/T | 05p | T | 0.472972973 | 0.464285714 | 0.869903 |
| rs29670    |           | A/C | 05q | A | 0.232142857 | 0.225225225 | 0.870017 |

|            |                 |     |     |   |             |             |          |
|------------|-----------------|-----|-----|---|-------------|-------------|----------|
| rs591120   | SEC16B          | C/G | 01q | C | 0.409523809 | 0.402912621 | 0.870025 |
| rs12659730 |                 | C/T | 05q | T | 0.261261261 | 0.254464286 | 0.87013  |
| rs2546217  |                 | A/G | 08q | G | 0.207207207 | 0.200892857 | 0.870145 |
| rs8178847  | APOH            | A/G | 17q | A | 0.069444444 | 0.064220183 | 0.870551 |
| rs10827306 | C10orf112       | C/T | 10p | T | 0.418918919 | 0.424107143 | 0.870795 |
| rs2291310  | TTN             | C/T | 02q | C | 0.075892857 | 0.072072072 | 0.870799 |
| rs473267   | PGM3            | C/T | 06q | T | 0.236607143 | 0.22972973  | 0.870848 |
| rs1548476  | ZNF550          | A/G | 19q | G | 0.5         | 0.494252874 | 0.871189 |
| rs4902264  | SYNE2           | C/T | 14q | T | 0.147321429 | 0.142857143 | 0.871192 |
| rs3812813  | USP44           | A/G | 12q | A | 0.4375      | 0.428571429 | 0.871193 |
| rs2003591  | KLHL22          | C/T | 22q | C | 0.066964286 | 0.063063063 | 0.871256 |
| rs7763726  | FNDC1           | A/G | 06q | G | 0.052083333 | 0.04787234  | 0.871337 |
| rs1537514  | MTHFR, C1orf167 | C/G | 01p | G | 0.107142857 | 0.103603604 | 0.871352 |
| rs5748622  | XKR3            | G/T | 22q | G | 0.117117117 | 0.111607143 | 0.871427 |
| rs2228273  | ZNF133          | A/G | 20p | A | 0.082524272 | 0.077319588 | 0.87154  |
| rs9939733  |                 | C/T | 16p | C | 0.307339449 | 0.3         | 0.871639 |
| rs3733504  | LOC728193       | A/G | 04q | G | 0.102678571 | 0.107142857 | 0.871861 |
| rs8071623  | C17orf47        | G/T | 17q | G | 0.243243243 | 0.236607143 | 0.872109 |
| rs4477896  |                 | C/T | 02p | T | 0.234234234 | 0.227272727 | 0.872184 |
| rs3826942  | MUM1            | C/T | 19p | C | 0.258928571 | 0.252252252 | 0.87221  |
| rs1381057  | POLQ            | C/T | 03q | T | 0.288288288 | 0.28125     | 0.872268 |
| rs1001586  | LOC388906       | A/C | 22q | A | 0.21875     | 0.214285714 | 0.872277 |
| rs4667319  | ITGA4           | A/G | 02q | G | 0.310185185 | 0.317307692 | 0.872391 |
| rs11108730 | LOC390352       | A/C | 12q | C | 0.236607143 | 0.22972973  | 0.872469 |
| rs677843   |                 | A/C | 17q | C | 0.364864865 | 0.357142857 | 0.872565 |
| rs929059   | DCBLD1          | A/G | 06q | A | 0.138392857 | 0.142857143 | 0.872679 |
| rs6886336  | BDP1            | A/G | 05q | G | 0.142857143 | 0.148648649 | 0.872874 |
| rs11171297 |                 | A/G | 12q | G | 0.3125      | 0.306306306 | 0.872959 |
| rs9327831  |                 | A/C | 05q | C | 0.303571429 | 0.299107143 | 0.873235 |
| rs180067   |                 | C/G | 17q | C | 0.389473684 | 0.396341463 | 0.873479 |
| rs5760749  | bA9F11.1        | G/T | 22q | G | 0.446428571 | 0.455357143 | 0.873487 |
| rs7528153  | VAV3            | A/T | 01p | T | 0.348214286 | 0.339285714 | 0.873638 |
| rs6766410  | HTR3C           | A/C | 03q | A | 0.454954955 | 0.446428571 | 0.87378  |
| rs10166891 | LOC391347       | A/G | 02p | G | 0.178571429 | 0.174107143 | 0.87378  |
| rs7995033  | MTMR6           | C/T | 13q | T | 0.131818182 | 0.128571429 | 0.874105 |
| rs2278761  |                 | C/T | 03q | C | 0.169642857 | 0.175675676 | 0.874513 |
| rs2072164  | OR2F1           | C/T | 07q | T | 0.075892857 | 0.072072072 | 0.874534 |

|            |                  |     |     |   |             |             |          |
|------------|------------------|-----|-----|---|-------------|-------------|----------|
| rs1949471  |                  | C/T | 03q | T | 0.149484536 | 0.154639175 | 0.874596 |
| rs10045605 |                  | C/T | 05q | C | 0.303571429 | 0.299107143 | 0.874598 |
| rs2505327  | PTCHD3           | A/G | 10p | A | 0.299107143 | 0.292792793 | 0.874731 |
| rs11885332 | ASB18            | A/G | 02q | A | 0.218085106 | 0.230337079 | 0.874836 |
| rs950210   | LOC127602        | A/C | 01q | A | 0.31981982  | 0.325892857 | 0.874868 |
| rs2285604  | ZNF547           | C/G | 19q | C | 0.471698113 | 0.46039604  | 0.874881 |
| rs2230229  | TNFRSF10A        | A/G | 08p | G | 0.129464286 | 0.135135135 | 0.874923 |
| rs2276853  | KIF9             | C/T | 03p | C | 0.441441441 | 0.432432432 | 0.875205 |
| rs739869   | TSHZ2            | C/G | 20q | C | 0.133928571 | 0.138392857 | 0.875234 |
| rs1494961  | HEL308           | C/T | 04q | C | 0.477272727 | 0.472727273 | 0.875288 |
| rs1060105  | SBNO1            | A/G | 12q | A | 0.218181818 | 0.213636364 | 0.875306 |
| rs2853533  | TYMS, C18orf56   | C/G | 18p | C | 0.130630631 | 0.126126126 | 0.875309 |
| rs17561    | IL1A             | G/T | 02q | T | 0.279279279 | 0.285714286 | 0.875382 |
| rs296093   | ZNF91            | A/G | 19p | G | 0.065420561 | 0.061320755 | 0.875473 |
| rs6788448  | ATP13A4          | C/T | 03q | C | 0.419642857 | 0.410714286 | 0.875514 |
| rs10506593 |                  | C/T | 12q | C | 0.125       | 0.120535714 | 0.8756   |
| rs1049534  | THOC5            | A/G | 22q | A | 0.23853211  | 0.24537037  | 0.875749 |
| rs6941356  | ZNF292           | A/G | 06q | G | 0.104545455 | 0.099099099 | 0.875861 |
| rs3179861  |                  | G/T | 17q | G | 0.067567568 | 0.063636364 | 0.876132 |
| rs7326449  | COL4A2           | A/G | 13q | G | 0.175675676 | 0.169642857 | 0.876224 |
| rs5995720  | VPREB1           | A/G | 22q | A | 0.169642857 | 0.165178571 | 0.87625  |
| rs6505776  | SEH1L            | A/C | 18p | C | 0.340909091 | 0.348214286 | 0.876256 |
| rs1013940  | SLC5A7           | C/T | 02q | C | 0.076576577 | 0.071428571 | 0.876411 |
| rs3177427  | GSTZ1            | A/G | 14q | A | 0.285714286 | 0.28125     | 0.876696 |
| rs11864937 | ADAD2, LOC654780 | G/T | 16q | T | 0.3125      | 0.31981982  | 0.876818 |
| rs3218649  | POLQ             | C/G | 03q | C | 0.340909091 | 0.334862385 | 0.876907 |
| rs8035931  | FBXL22           | C/G | 15q | C | 0.120535714 | 0.125       | 0.877222 |
| rs3738281  | LAD1             | A/C | 01q | A | 0.103603604 | 0.108108108 | 0.877226 |
| rs1047699  | PRR4             | C/T | 12p | T | 0.144144144 | 0.148648649 | 0.877286 |
| rs887230   | FLJ44815         | A/G | 17q | G | 0.171171171 | 0.175675676 | 0.877464 |
| rs3811505  |                  | A/G | 01p | G | 0.138392857 | 0.133928571 | 0.877586 |
| rs3131933  |                  | A/G | 06p | A | 0.486607143 | 0.495495495 | 0.87768  |
| rs1530496  | DNAH5            | A/G | 05p | A | 0.272727273 | 0.278301887 | 0.877884 |
| rs420703   | TSPAN16          | G/T | 19p | T | 0.330357143 | 0.339285714 | 0.877942 |
| rs10846333 |                  | G/T | 12p | T | 0.495495495 | 0.495412844 | 0.878137 |
| rs3733557  | FAM44A           | A/G | 04p | A | 0.151785714 | 0.147321429 | 0.878187 |
| rs1515441  | SPATA16          | A/G | 03q | A | 0.098214286 | 0.09375     | 0.878416 |

|            |                    |     |     |   |             |             |          |
|------------|--------------------|-----|-----|---|-------------|-------------|----------|
| rs6793295  | LRRC34             | C/T | 03q | C | 0.252252252 | 0.259259259 | 0.878663 |
| rs1801725  | CASR               | G/T | 03q | T | 0.157657658 | 0.151785714 | 0.878908 |
| rs1044250  | ANGPTL4            | C/T | 19p | T | 0.301801802 | 0.294642857 | 0.879453 |
| rs3131968  |                    | C/T | 01p | T | 0.13963964  | 0.144144144 | 0.879812 |
| rs1975349  |                    | C/T | 19p | C | 0.174107143 | 0.178571429 | 0.879869 |
| rs7765803  | LPA                | C/G | 06q | C | 0.339285714 | 0.345454545 | 0.880189 |
| rs7710284  | SPEF2              | A/T | 05p | A | 0.116071429 | 0.121621622 | 0.880666 |
| rs10790715 | HEPACAM            | C/T | 11q | T | 0.272727273 | 0.268181818 | 0.881376 |
| rs868738   | NRAP               | C/T | 10q | T | 0.339805825 | 0.346153846 | 0.881412 |
| rs9358856  | LRRC16             | A/G | 06p | A | 0.147321429 | 0.151785714 | 0.881443 |
| rs3088235  | BSPRY              | C/T | 09q | T | 0.207070707 | 0.208737864 | 0.881667 |
| rs2015035  | LOC550631          | A/C | 22q | A | 0.066964286 | 0.0625      | 0.881772 |
| rs1537232  | DNAH8              | C/T | 06p | T | 0.138392857 | 0.133928571 | 0.881848 |
| rs3750898  | DCLRE1A            | C/G | 10q | G | 0.209821429 | 0.214285714 | 0.882373 |
| rs7462     | PIH1D1             | C/T | 19q | T | 0.308035714 | 0.3125      | 0.882443 |
| rs2344829  |                    | A/G | 11p | G | 0.333333333 | 0.325892857 | 0.882534 |
| rs1923822  |                    | C/T | 01q | T | 0.209821429 | 0.216216216 | 0.882941 |
| rs3746803  | C20orf54           | A/G | 20p | A | 0.091743119 | 0.086538461 | 0.882965 |
| rs904383   | C17orf80           | A/G | 17q | G | 0.483146067 | 0.472826087 | 0.88324  |
| rs1628172  | PDE4DIP, LOC652879 | A/G | 01q | A | 0.203703704 | 0.198198198 | 0.883341 |
| rs157024   | MYO16              | A/G | 13q | G | 0.133928571 | 0.129464286 | 0.883349 |
| rs3738573  | DNASE2B            | C/G | 01p | G | 0.351351351 | 0.346846847 | 0.883554 |
| rs432335   |                    | A/G | 01q | G | 0.14516129  | 0.15        | 0.883626 |
| rs1012272  | GTDC1              | A/G | 02q | A | 0.078703704 | 0.080952381 | 0.883753 |
| rs7179270  | TJP1               | C/T | 15q | C | 0.084821429 | 0.087155963 | 0.883926 |
| rs217086   | CTSC               | A/G | 11q | A | 0.171171171 | 0.165178571 | 0.884096 |
| rs2270662  | LOC727862          | C/T | 17q | C | 0.463963964 | 0.472727273 | 0.884851 |
| rs6442117  | FBXW12             | C/T | 03p | C | 0.464285714 | 0.473214286 | 0.884857 |
| rs4917153  | ABCA13             | A/G | 07p | G | 0.112612613 | 0.116071429 | 0.884893 |
| rs10258719 | ATP6V0A4           | A/G | 07q | A | 0.267857143 | 0.274774775 | 0.885107 |
| rs3750450  | EPB41L4B           | A/C | 09q | A | 0.267857143 | 0.274774775 | 0.885234 |
| rs4764643  | UTP20              | C/G | 12q | G | 0.202702703 | 0.2         | 0.885572 |
| rs6448389  | SLC34A2            | A/G | 04p | A | 0.15625     | 0.160714286 | 0.885666 |
| rs423151   | LRRC37B2           | C/T | 17q | C | 0.144144144 | 0.13963964  | 0.885868 |
| rs855523   |                    | A/C | 09p | C | 0.077981651 | 0.074074074 | 0.885969 |
| rs7144340  | RCOR1              | G/T | 14q | T | 0.28125     | 0.274774775 | 0.886129 |
| rs229150   | SCFD1              | C/T | 14q | C | 0.316964286 | 0.325892857 | 0.886297 |



|            |                |     |     |   |             |             |          |
|------------|----------------|-----|-----|---|-------------|-------------|----------|
| rs3737271  |                | A/G | 14q | A | 0.295918367 | 0.301020408 | 0.886343 |
| rs7205673  | PKD1L2         | A/G | 16q | G | 0.214285714 | 0.21875     | 0.886545 |
| rs299295   | HMMR           | C/T | 05q | T | 0.252252252 | 0.256756757 | 0.886894 |
| rs2276551  | LOC165186      | A/C | 02p | C | 0.121621622 | 0.126126126 | 0.88691  |
| rs4841133  |                | A/G | 08p | A | 0.098214286 | 0.09375     | 0.886981 |
| rs4795690  | ZNF207, RHBDL3 | A/G | 17q | A | 0.172727273 | 0.166666667 | 0.887183 |
| rs10879901 | CAPS2          | A/C | 12q | A | 0.241071429 | 0.245535714 | 0.887194 |
| rs2295564  | CST9L          | G/T | 20p | G | 0.4         | 0.406542056 | 0.887349 |
| rs11045676 | LST-3TM12      | A/T | 12p | A | 0.160714286 | 0.15625     | 0.887534 |
| rs10786775 | OBFC1          | C/G | 10q | G | 0.095454546 | 0.099056604 | 0.887908 |
| rs2274285  | COG3           | A/G | 13q | A | 0.245098039 | 0.240196078 | 0.888068 |
| rs3811987  | GCNT4          | A/G | 05q | A | 0.308035714 | 0.3125      | 0.888106 |
| rs6494     | ALKBH1         | A/T | 14q | T | 0.245454546 | 0.237373737 | 0.888494 |
| rs2282488  | P4HA3          | A/G | 11q | A | 0.098214286 | 0.094594595 | 0.888748 |
| rs3817552  | MYBPC1         | C/G | 12q | C | 0.147321429 | 0.151785714 | 0.888946 |
| rs855465   | LOC731292      | G/T | 09p | T | 0.071428571 | 0.068181818 | 0.889182 |
| rs2297810  | CYP4B1         | C/T | 01p | T | 0.147321429 | 0.151785714 | 0.889596 |
| rs4378600  | HSDL1          | C/G | 16q | C | 0.279279279 | 0.283783784 | 0.889605 |
| rs10281195 |                | C/T | 07q | C | 0.107142857 | 0.111607143 | 0.889774 |
| rs983034   | GPR177         | C/T | 01p | T | 0.40990991  | 0.401869159 | 0.889811 |
| rs10508862 | ZNF33A         | C/G | 10p | C | 0.09375     | 0.098214286 | 0.889941 |
| rs2562052  |                | A/G | 19q | G | 0.09009009  | 0.09375     | 0.890122 |
| rs10205944 | ROCK2          | A/T | 02p | A | 0.130630631 | 0.133928571 | 0.890193 |
| rs2228243  | HRG            | A/G | 03q | G | 0.189814815 | 0.183486239 | 0.89023  |
| rs1049683  | CABYR          | A/C | 18q | A | 0.125       | 0.120535714 | 0.890401 |
| rs3733011  |                | C/T | 03q | C | 0.130630631 | 0.126168224 | 0.890565 |
| rs2131535  | ADAMTS8        | A/G | 11q | G | 0.267857143 | 0.272321429 | 0.89064  |
| rs3738413  | TRIM45         | C/T | 01p | T | 0.09375     | 0.098214286 | 0.89064  |
| rs323345   | TEX15          | C/T | 08p | C | 0.126126126 | 0.121621622 | 0.890825 |
| rs3746737  | CSTL1          | C/T | 20p | T | 0.09009009  | 0.09375     | 0.890883 |
| rs2477120  | CEP350         | C/G | 01q | G | 0.36036036  | 0.364864865 | 0.890923 |
| rs2304029  | FAT2           | C/G | 05q | G | 0.054545455 | 0.058558559 | 0.891047 |
| rs3777721  | RNASSET2       | C/G | 06q | C | 0.052380952 | 0.055555556 | 0.8911   |
| rs2301582  | NLRP1          | A/G | 17p | A | 0.40625     | 0.410714286 | 0.891265 |
| rs6927398  | C6orf148       | C/G | 06q | C | 0.241071429 | 0.245535714 | 0.891339 |
| rs10004516 | ENPEP          | A/G | 04q | A | 0.112149533 | 0.108490566 | 0.891572 |
| rs1063310  | GABRP          | A/C | 05q | A | 0.183486238 | 0.179245283 | 0.891693 |

|            |                   |     |     |   |             |             |          |
|------------|-------------------|-----|-----|---|-------------|-------------|----------|
| rs11881580 | WDR88             | C/T | 19q | C | 0.084821429 | 0.081081081 | 0.891945 |
| rs1494555  | IL7R              | C/T | 05p | C | 0.339285714 | 0.331818182 | 0.891947 |
| rs7690230  | LOC729902         | G/T | 04q | T | 0.396396396 | 0.401785714 | 0.892386 |
| rs1778540  | VN1R5             | C/T | 01q | T | 0.107142857 | 0.102678571 | 0.892784 |
| rs1891110  | CUZD1, FAM24B     | A/G | 10q | G | 0.468468469 | 0.477272727 | 0.892927 |
| rs4027402  | SYNE2             | C/T | 14q | C | 0.142857143 | 0.13963964  | 0.89298  |
| rs7188200  | LOC197322         | C/T | 16q | T | 0.232142857 | 0.236607143 | 0.893056 |
| rs7103033  | OR1S1             | A/G | 11q | G | 0.337837838 | 0.334862385 | 0.893267 |
| rs6967330  | FLJ23834          | A/G | 07q | A | 0.1         | 0.105504587 | 0.893366 |
| rs466384   |                   | C/T | 06p | C | 0.147321429 | 0.142857143 | 0.893513 |
| rs2993010  | TRPM3             | A/G | 09q | A | 0.431192661 | 0.436936937 | 0.893593 |
| rs11736872 | WDR17             | A/G | 04q | A | 0.276785714 | 0.272321429 | 0.893957 |
| rs4534403  |                   | A/T | 01q | A | 0.348214286 | 0.342342342 | 0.894036 |
| rs11629955 |                   | C/T | 15q | C | 0.4375      | 0.441964286 | 0.894531 |
| rs1052887  |                   | C/G | 15q | G | 0.236263736 | 0.227777778 | 0.894652 |
| rs4027404  | SYNE2             | A/G | 14q | G | 0.154205608 | 0.16        | 0.894708 |
| rs12226614 |                   | C/T | 11q | T | 0.154205608 | 0.148148148 | 0.894735 |
| rs12602520 | KIAA0100          | A/C | 17q | C | 0.107142857 | 0.102678571 | 0.894863 |
| rs11168639 |                   | A/G | 12q | A | 0.171717172 | 0.176190476 | 0.894891 |
| rs3819257  | TMPRSS11F, SYT14L | C/T | 04q | T | 0.214285714 | 0.22        | 0.89497  |
| rs7739323  | C6orf157          | C/T | 06q | T | 0.147321429 | 0.142857143 | 0.894979 |
| rs809203   | C8orf49           | A/T | 08p | T | 0.351351351 | 0.355855856 | 0.895517 |
| rs3829767  | SYNE2             | A/G | 14q | A | 0.142857143 | 0.147321429 | 0.895942 |
| rs2478046  | C13orf18          | C/T | 13q | T | 0.142857143 | 0.138392857 | 0.895961 |
| rs1328361  | GUCY1B2           | G/T | 13q | T | 0.361607143 | 0.357142857 | 0.896118 |
| rs160277   | VCAN              | A/C | 05q | A | 0.366071429 | 0.361607143 | 0.896253 |
| rs8103002  | LOC284441         | C/G | 19p | G | 0.1875      | 0.193693694 | 0.896432 |
| rs11690358 | COL6A3            | C/T | 02q | C | 0.107142857 | 0.102678571 | 0.896706 |
| rs8060294  | PKD1L2            | A/G | 16q | G | 0.325892857 | 0.31981982  | 0.896755 |
| rs7193955  | ABCC12            | A/G | 16q | G | 0.205357143 | 0.200892857 | 0.896768 |
| rs879665   | LOC339766         | C/T | 02q | T | 0.147321429 | 0.151785714 | 0.897238 |
| rs4851287  | LONRF2            | A/G | 02q | A | 0.389908257 | 0.383928571 | 0.897477 |
| rs5749082  | LOC550631         | A/T | 22q | T | 0.274774775 | 0.28125     | 0.897752 |
| rs12638625 | FLJ23049          | C/G | 03q | C | 0.299107143 | 0.303571429 | 0.897853 |
| rs3738000  | NEK11             | A/T | 03q | A | 0.272321429 | 0.276785714 | 0.897888 |
| rs6032538  | WFDC3             | C/G | 20q | G | 0.313084112 | 0.308411215 | 0.898075 |
| rs3821812  | RTP4              | C/T | 03q | T | 0.330357143 | 0.334821429 | 0.89841  |

|            |                 |     |     |   |             |             |          |
|------------|-----------------|-----|-----|---|-------------|-------------|----------|
| rs2891775  |                 | C/T | 02p | C | 0.17961165  | 0.172897196 | 0.898536 |
| rs1057190  | PUS7L           | A/G | 12q | G | 0.120535714 | 0.125       | 0.898953 |
| rs2281390  |                 | A/C | 06p | A | 0.183035714 | 0.178571429 | 0.899154 |
| rs1551122  | C12orf64        | C/T | 12q | T | 0.345794393 | 0.339285714 | 0.899239 |
| rs132653   | APOL3           | A/C | 22q | C | 0.160714286 | 0.15625     | 0.899573 |
| rs8187799  | ABCB4           | A/G | 07q | G | 0.089285714 | 0.085585586 | 0.899753 |
| rs4819522  | TBX1            | C/T | 22q | T | 0.175675676 | 0.169642857 | 0.899804 |
| rs3737486  |                 | C/G | 04q | G | 0.153153153 | 0.15        | 0.899849 |
| rs35195    | CDH11           | A/G | 16q | A | 0.36036036  | 0.366071429 | 0.899951 |
| rs10779261 | USH2A           | C/T | 01q | C | 0.308035714 | 0.303571429 | 0.900247 |
| rs7086568  |                 | C/G | 10p | C | 0.120535714 | 0.117117117 | 0.900743 |
| rs2023477  | FLJ45422        | C/T | 06p | T | 0.214285714 | 0.21875     | 0.900967 |
| rs6580741  | LOC643275       | C/G | 12q | C | 0.315315315 | 0.321428571 | 0.90099  |
| rs9527025  | KL              | C/G | 13q | C | 0.160714286 | 0.155963303 | 0.901154 |
| rs3801906  | RBM33           | C/T | 07q | T | 0.178571429 | 0.183035714 | 0.901189 |
| rs10849133 | GALNT8          | G/T | 12p | G | 0.348623853 | 0.342342342 | 0.901244 |
| rs3116817  |                 | A/G | 06p | G | 0.446428571 | 0.441964286 | 0.901282 |
| rs3733413  | FAT             | C/T | 04q | C | 0.397321429 | 0.401785714 | 0.901324 |
| rs11568591 | ABCC3           | A/G | 17q | A | 0.076576577 | 0.080357143 | 0.901342 |
| rs10407115 | PPAP2C          | A/G | 19p | A | 0.446428571 | 0.441964286 | 0.901609 |
| rs10503929 | NRG1            | C/T | 08p | C | 0.174107143 | 0.169642857 | 0.901727 |
| rs2258689  | MAPT            | C/T | 17q | C | 0.232142857 | 0.227678571 | 0.901962 |
| rs2228226  | GLI1, ARHGAP9   | C/G | 12q | G | 0.303571429 | 0.299107143 | 0.901997 |
| rs1064583  | COL10A1, NT5DC1 | C/T | 06q | C | 0.383928571 | 0.379464286 | 0.902198 |
| rs12656368 |                 | C/T | 05q | T | 0.459821429 | 0.455357143 | 0.902222 |
| rs2239819  | TNR             | G/T | 01q | T | 0.245535714 | 0.241071429 | 0.902236 |
| rs213544   | LOC151507       | G/T | 02q | T | 0.102678571 | 0.099099099 | 0.902247 |
| rs156631   | PLA2G4C         | C/T | 19q | C | 0.375       | 0.379464286 | 0.902402 |
| rs6579767  |                 | C/T | 05q | C | 0.18018018  | 0.175675676 | 0.90248  |
| rs540825   | OPRM1           | A/T | 06q | T | 0.223214286 | 0.21875     | 0.902783 |
| rs4079448  |                 | A/C | 05q | A | 0.321428571 | 0.316964286 | 0.902859 |
| rs715748   | BDP1            | A/G | 05q | A | 0.490990991 | 0.486363636 | 0.902902 |
| rs11264743 | CREB3L4         | A/G | 01q | A | 0.292792793 | 0.297297297 | 0.903105 |
| rs10936600 | LRRC34          | A/T | 03q | T | 0.223214286 | 0.227678571 | 0.903533 |
| rs7947230  |                 | G/T | 11p | G | 0.183035714 | 0.178571429 | 0.903622 |
| rs2523072  | C7orf31         | C/G | 07p | C | 0.395454545 | 0.401785714 | 0.903654 |
| rs8063634  |                 | C/T | 16q | T | 0.330188679 | 0.337962963 | 0.903707 |

|            |           |     |     |   |             |             |          |
|------------|-----------|-----|-----|---|-------------|-------------|----------|
| rs2731073  | OR8S1     | A/G | 12q | A | 0.121621622 | 0.125       | 0.904008 |
| rs3758526  | NOC3L     | A/C | 10q | C | 0.122727273 | 0.120535714 | 0.904015 |
| rs3817405  | PLXDC2    | C/T | 10p | C | 0.294642857 | 0.299107143 | 0.904493 |
| rs911277   | LOC400796 | C/T | 01q | C | 0.473214286 | 0.46875     | 0.904627 |
| rs6429757  | AGMAT     | C/G | 01p | C | 0.438679245 | 0.444444444 | 0.904695 |
| rs2512228  |           | A/G | 11q | A | 0.477477477 | 0.472727273 | 0.904933 |
| rs3733414  | FAT       | A/C | 04q | A | 0.325892857 | 0.330275229 | 0.905056 |
| rs11863236 | ABCC11    | G/T | 16q | T | 0.094594595 | 0.098214286 | 0.905168 |
| rs1233387  | OR2H2     | A/G | 06p | G | 0.242990654 | 0.247747748 | 0.905317 |
| rs11260887 |           | A/G | 01p | A | 0.361607143 | 0.364864865 | 0.905414 |
| rs299290   | HMMR      | C/T | 05q | C | 0.288288288 | 0.28125     | 0.905514 |
| rs948060   | MGC34821  | C/G | 11q | C | 0.151785714 | 0.147321429 | 0.905529 |
| rs12314438 | EFCAB4B   | A/G | 12p | A | 0.111607143 | 0.116071429 | 0.905597 |
| rs7724239  |           | A/T | 05q | A | 0.357142857 | 0.352678571 | 0.905603 |
| rs1129659  | C20orf58  | A/C | 20q | C | 0.357142857 | 0.352678571 | 0.906215 |
| rs2076161  | TTLL1     | C/G | 22q | C | 0.151785714 | 0.15625     | 0.906313 |
| rs318108   |           | A/G | 05q | A | 0.15625     | 0.160714286 | 0.906363 |
| rs1864346  | OR6N1     | C/T | 01q | T | 0.226804124 | 0.22        | 0.906471 |
| rs641712   | COL24A1   | A/G | 01p | A | 0.318181818 | 0.313636364 | 0.906622 |
| rs10889205 | RLF       | A/T | 01p | T | 0.224299065 | 0.228571429 | 0.906725 |
| rs3820678  | OR10R2    | A/G | 01q | A | 0.196428571 | 0.193693694 | 0.906785 |
| rs7874348  | OLFML2A   | A/G | 09q | A | 0.325892857 | 0.321428571 | 0.906791 |
| rs11769443 |           | C/T | 07p | C | 0.348484848 | 0.343373494 | 0.906811 |
| rs3748338  | RNASE4    | A/T | 14q | T | 0.144144144 | 0.140909091 | 0.906831 |
| rs7047181  |           | C/G | 09q | G | 0.373873874 | 0.379464286 | 0.906904 |
| rs3734311  | IMPG1     | C/G | 06q | G | 0.383928571 | 0.378378378 | 0.907106 |
| rs321776   | ANKRD55   | C/T | 05q | T | 0.279279279 | 0.276785714 | 0.907197 |
| rs11939575 | FAT       | C/T | 04q | T | 0.171171171 | 0.166666667 | 0.907477 |
| rs6741892  | GALM      | A/T | 02p | T | 0.080357143 | 0.075892857 | 0.907977 |
| rs1429410  |           | G/T | 02p | G | 0.133928571 | 0.138392857 | 0.908159 |
| rs2075084  |           | G/T | 07p | T | 0.254464286 | 0.258928571 | 0.908296 |
| rs4057750  | OR8B4     | A/G | 11q | G | 0.232142857 | 0.227678571 | 0.908325 |
| rs6839940  |           | C/G | 04q | G | 0.261261261 | 0.265765766 | 0.908365 |
| rs3826861  | OPA3      | A/G | 19q | G | 0.396551724 | 0.403225807 | 0.908424 |
| rs2302310  | GPR103    | C/T | 04q | C | 0.151785714 | 0.147321429 | 0.908511 |
| rs971576   |           | A/C | 03p | A | 0.388392857 | 0.383928571 | 0.908514 |
| rs6580870  | KRT7      | A/G | 12q | A | 0.15625     | 0.160714286 | 0.908557 |

|            |                    |     |     |   |             |             |          |
|------------|--------------------|-----|-----|---|-------------|-------------|----------|
| rs9807047  | LOC731414          | A/G | 17q | G | 0.147321429 | 0.151785714 | 0.908578 |
| rs3733591  | SLC2A9             | A/G | 04p | A | 0.202702703 | 0.205357143 | 0.908652 |
| rs10460587 | TGOLN2             | C/T | 02p | C | 0.428571429 | 0.435185185 | 0.908693 |
| rs12427062 | DHX37              | C/T | 12q | T | 0.375       | 0.370535714 | 0.908778 |
| rs5992495  | TXNRD2             | G/T | 22q | G | 0.1875      | 0.191964286 | 0.909071 |
| rs2740349  | GEMIN4             | A/G | 17p | G | 0.138392857 | 0.133928571 | 0.909121 |
| rs2074493  | HLA-C              | G/T | 06p | G | 0.252380952 | 0.252427184 | 0.909218 |
| rs1021580  | CDC20B             | C/T | 05q | C | 0.151785714 | 0.147321429 | 0.909222 |
| rs438034   | CENPF              | C/T | 01q | T | 0.464285714 | 0.46875     | 0.90927  |
| rs818818   | SLC22A14           | C/T | 03p | C | 0.107142857 | 0.111607143 | 0.90932  |
| rs3856145  | LOC127602          | A/C | 01q | A | 0.433035714 | 0.4375      | 0.909395 |
|            | ZNF138, LOC730295, |     |     |   |             |             |          |
| rs6460195  | LOC731265          | A/G | 07q | A | 0.381818182 | 0.375       | 0.909404 |
| rs7669418  | KIAA0922           | A/G | 04q | G | 0.306306306 | 0.313636364 | 0.909505 |
| rs3746736  | CSTL1              | C/T | 20p | T | 0.491071429 | 0.495535714 | 0.909556 |
| rs805657   | SLK                | A/G | 10q | A | 0.165178571 | 0.169642857 | 0.909577 |
| rs380421   |                    | C/T | 20q | T | 0.40625     | 0.401785714 | 0.909661 |
| rs1035834  | FBXO36             | G/T | 02q | T | 0.209090909 | 0.204545455 | 0.909904 |
| rs10838092 | OR51Q1             | C/T | 11p | T | 0.387387387 | 0.392857143 | 0.910126 |
| rs7099565  | TRUB1              | A/G | 10q | G | 0.5         | 0.494680851 | 0.910239 |
| rs9967382  | SERPINB10          | C/T | 18q | T | 0.205357143 | 0.209821429 | 0.910522 |
| rs743616   | ARSA               | C/G | 22q | G | 0.46875     | 0.463963964 | 0.910545 |
| rs3746887  | B3GALT5            | C/T | 21q | T | 0.209821429 | 0.205357143 | 0.910974 |
| rs7130838  | DLG2               | C/T | 11q | C | 0.160714286 | 0.15625     | 0.91109  |
| rs7124081  |                    | A/C | 11p | A | 0.418918919 | 0.423423423 | 0.911162 |
| rs2429485  | PTCHD3             | C/T | 10p | T | 0.290178571 | 0.285714286 | 0.911225 |
| rs2822785  |                    | A/G | 21q | A | 0.434782609 | 0.430851064 | 0.911304 |
| rs8077382  | ST6GALNAC1         | A/G | 17q | G | 0.13963964  | 0.143518519 | 0.911691 |
| rs10801922 | PTGFRN             | A/G | 01p | A | 0.454954955 | 0.449541284 | 0.911756 |
| rs7120079  | OR4D11             | C/T | 11q | C | 0.36036036  | 0.363207547 | 0.912057 |
| rs11229413 | OR5B3              | A/G | 11q | G | 0.366071429 | 0.361607143 | 0.912062 |
| rs2229742  | NRIP1              | C/G | 21q | G | 0.116071429 | 0.111607143 | 0.912206 |
| rs2465811  | PTPRB              | C/T | 12q | C | 0.276785714 | 0.272321429 | 0.912466 |
| rs241935   |                    | A/C | 19q | A | 0.198198198 | 0.200892857 | 0.91259  |
| rs3751223  | LOC341346          | C/T | 12p | T | 0.055045872 | 0.053571429 | 0.912919 |
| rs2045732  | TDRD7              | C/T | 09q | T | 0.486486487 | 0.491071429 | 0.913208 |
| rs12674488 | MCPH1              | A/C | 08p | A | 0.1875      | 0.191964286 | 0.913275 |

|            |                      |     |     |   |             |             |          |
|------------|----------------------|-----|-----|---|-------------|-------------|----------|
| rs494791   | CCDC90B              | A/C | 11q | A | 0.325892857 | 0.31981982  | 0.913348 |
| rs6998760  | PSKH2                | A/C | 08q | A | 0.361607143 | 0.357142857 | 0.913357 |
| rs7949789  | LOC729173, LOC731408 | A/T | 11q | A | 0.45        | 0.455357143 | 0.913399 |
| rs3178175  |                      | A/T | 05q | A | 0.481818182 | 0.476851852 | 0.9136   |
| rs9371114  |                      | A/C | 06q | C | 0.178571429 | 0.183035714 | 0.913612 |
| rs2215955  | AMPH                 | A/C | 07p | A | 0.285714286 | 0.290178571 | 0.913685 |
| rs1062062  | TBC1D8               | A/G | 02q | A | 0.137614679 | 0.135514019 | 0.913847 |
| rs927340   | LOC401233            | A/G | 06p | A | 0.205357143 | 0.200892857 | 0.913908 |
| rs10896980 |                      | C/T | 11q | C | 0.410714286 | 0.414414414 | 0.913976 |
| rs9495391  | TXLNB                | C/G | 06q | G | 0.37254902  | 0.378787879 | 0.913987 |
| rs237422   | C20orf196            | A/G | 20p | A | 0.254464286 | 0.258928571 | 0.914023 |
| rs6986845  |                      | G/T | 08p | T | 0.222727273 | 0.21875     | 0.914066 |
| rs1165196  | SLC17A1              | C/T | 06p | C | 0.454954955 | 0.459459459 | 0.914305 |
| rs871765   |                      | C/T | 01q | C | 0.272321429 | 0.276785714 | 0.914325 |
| rs3803850  |                      | C/T | 17p | C | 0.256756757 | 0.252252252 | 0.914499 |
| rs4525     | F5                   | A/G | 01q | G | 0.303571429 | 0.299107143 | 0.914619 |
| rs31517    | LECT2                | A/G | 05q | A | 0.36036036  | 0.364864865 | 0.914821 |
| rs10828833 | GPR158               | A/G | 10p | G | 0.423423423 | 0.418181818 | 0.915269 |
| rs3179023  |                      | C/T | 12p | C | 0.418181818 | 0.422727273 | 0.915406 |
| rs3736919  | LOC646871            | C/T | 13q | C | 0.490825688 | 0.495535714 | 0.915436 |
| rs3740640  | FGF4                 | A/G | 11q | G | 0.116071429 | 0.111607143 | 0.915475 |
| rs3198831  | PSG6                 | C/G | 19q | G | 0.290178571 | 0.285714286 | 0.915508 |
| rs948071   |                      | A/G | 11q | G | 0.274774775 | 0.279279279 | 0.91577  |
| rs7156661  | MED6                 | A/G | 14q | G | 0.151785714 | 0.15625     | 0.916177 |
| rs323344   | TEX15                | A/C | 08p | C | 0.125       | 0.121621622 | 0.916464 |
| rs2948386  | RAB19                | C/T | 07q | C | 0.276785714 | 0.28125     | 0.916682 |
| rs2056899  | CYP4A22, LOC654164   | A/T | 01p | A | 0.388392857 | 0.382882883 | 0.916774 |
| rs9520222  |                      | C/T | 13q | T | 0.234234234 | 0.241071429 | 0.916789 |
| rs2306857  | C3orf17              | A/T | 03q | A | 0.254464286 | 0.258928571 | 0.916805 |
| rs1801968  | TOR1A                | C/G | 09q | C | 0.138392857 | 0.144144144 | 0.916882 |
| rs6670455  |                      | G/T | 01q | G | 0.218181818 | 0.222727273 | 0.916989 |
| rs807534   | KIAA0319             | C/T | 06p | C | 0.144144144 | 0.148648649 | 0.916993 |
| rs552888   |                      | C/T | 01q | C | 0.097222222 | 0.094594595 | 0.917239 |
| rs8020323  | C14orf143            | A/G | 14q | A | 0.189189189 | 0.183035714 | 0.917332 |
| rs3818717  | RAI1                 | A/G | 17p | A | 0.441964286 | 0.446428571 | 0.917423 |
| rs11057306 | DDX55                | A/G | 12q | G | 0.126126126 | 0.129464286 | 0.917475 |
| rs2291627  | EIF2AK4              | G/T | 15q | G | 0.104545454 | 0.110091743 | 0.917548 |

|            |                    |     |     |   |             |             |          |
|------------|--------------------|-----|-----|---|-------------|-------------|----------|
| rs2230678  | SFRS4              | A/G | 01p | G | 0.22972973  | 0.225225225 | 0.917595 |
| rs3742321  | STARD13            | C/T | 13q | C | 0.209821429 | 0.214285714 | 0.917857 |
| rs7527925  | LOC127602          | C/T | 01q | C | 0.459459459 | 0.463963964 | 0.918055 |
| rs8105737  | OR111              | A/C | 19p | A | 0.325892857 | 0.330357143 | 0.918163 |
| rs683369   | SLC22A1            | C/G | 06q | G | 0.181818182 | 0.186363636 | 0.918224 |
| rs3125734  | PLEKHK1            | C/T | 10q | T | 0.370535714 | 0.375       | 0.91857  |
| rs7558074  | EIF5B              | A/C | 02q | A | 0.436363636 | 0.432432432 | 0.918833 |
| rs2242527  | SALL2              | C/G | 14q | C | 0.112612613 | 0.116071429 | 0.919053 |
| rs11111817 |                    | A/G | 12q | A | 0.308035714 | 0.303571429 | 0.919226 |
| rs10935070 | TOPBP1             | A/G | 03q | G | 0.36        | 0.363636364 | 0.919266 |
| rs8077302  | COX10              | A/G | 17p | G | 0.495535714 | 0.5         | 0.919463 |
| rs5764698  | SMC1B              | G/T | 22q | T | 0.477477478 | 0.473214286 | 0.920146 |
| rs1453547  | OR5A2              | A/G | 11q | A | 0.313636364 | 0.308035714 | 0.920153 |
| rs4357719  | OR52E6             | C/T | 11p | C | 0.36036036  | 0.357142857 | 0.920192 |
| rs1042034  | APOB               | A/G | 02p | G | 0.234234234 | 0.227272727 | 0.920372 |
| rs3738401  | DISC1              | A/G | 01q | A | 0.336363636 | 0.331818182 | 0.920679 |
| rs1185193  | SETX               | A/C | 09q | A | 0.129464286 | 0.133928571 | 0.920761 |
| rs10817858 | C9orf97            | G/T | 09q | T | 0.174107143 | 0.171171171 | 0.920926 |
| rs13151    | RNF149             | C/G | 02q | G | 0.142156863 | 0.145631068 | 0.921033 |
| rs7572392  | LOC151174          | A/C | 02q | C | 0.352678571 | 0.348214286 | 0.921294 |
| rs524625   | ANKRD5             | A/G | 20p | A | 0.231818182 | 0.236607143 | 0.921312 |
| rs2976189  | SLC7A13            | A/G | 08q | A | 0.13963964  | 0.142857143 | 0.921558 |
| rs3013105  | LRRRC38            | C/T | 01p | C | 0.410714286 | 0.415178571 | 0.921644 |
| rs2257167  | IFNAR1             | C/G | 21q | C | 0.179245283 | 0.185714286 | 0.922193 |
| rs2675703  | OPN4               | C/T | 10q | T | 0.195       | 0.196969697 | 0.922356 |
| rs195570   | LOC650794          | G/T | 13q | G | 0.178571429 | 0.175675676 | 0.92236  |
| rs2257505  | C5orf35            | A/T | 05q | T | 0.258928571 | 0.263392857 | 0.922363 |
| rs859398   | TNR                | A/G | 01q | A | 0.322727273 | 0.316964286 | 0.92256  |
| rs3192723  | MTRF1L             | A/G | 06q | A | 0.15625     | 0.153153153 | 0.922659 |
| rs7121276  | OR9G1              | G/T | 11q | T | 0.13963964  | 0.136363636 | 0.922894 |
| rs2727103  | DENND4A, LOC646358 | A/T | 15q | A | 0.209821429 | 0.214285714 | 0.92295  |
| rs871841   | ARHGEF15           | A/G | 17p | G | 0.495535714 | 0.5         | 0.923403 |
| rs715747   | BDP1               | C/G | 05q | C | 0.144144144 | 0.147321429 | 0.923513 |
| rs961098   | ANKRD31            | C/G | 05q | G | 0.205357143 | 0.200892857 | 0.923551 |
| rs3748041  | BDP1               | A/G | 05q | G | 0.46875     | 0.464285714 | 0.923607 |
| rs665522   | KRT71              | C/T | 12q | T | 0.227678571 | 0.232142857 | 0.92365  |
| rs7410764  |                    | A/C | 22q | C | 0.422727273 | 0.426605505 | 0.924007 |

|            |                |     |     |   |             |             |          |
|------------|----------------|-----|-----|---|-------------|-------------|----------|
| rs4077855  |                | C/T | 07p | C | 0.325892857 | 0.330357143 | 0.924026 |
| rs1880247  |                | C/T | 09q | T | 0.142857143 | 0.147321429 | 0.924387 |
| rs2074506  | VAR52          | A/C | 06p | A | 0.379464286 | 0.382882883 | 0.92439  |
| rs10558    | TMEM99         | C/T | 17q | C | 0.174107143 | 0.169642857 | 0.924645 |
| rs913588   | JMJD2C         | A/G | 09p | G | 0.495412844 | 0.5         | 0.92513  |
| rs2340601  | MOV10L1        | A/G | 22q | A | 0.241071429 | 0.238738739 | 0.925337 |
| rs11742049 |                | C/T | 05q | T | 0.165178571 | 0.162162162 | 0.92543  |
| rs450739   | LOC642636      | C/T | 20p | C | 0.45412844  | 0.457943925 | 0.925449 |
| rs1462983  | OR56B4         | C/T | 11p | T | 0.433035714 | 0.428571429 | 0.925464 |
| rs1402467  | SULT1C4        | C/G | 02q | G | 0.223214286 | 0.227272727 | 0.925695 |
| rs3733708  |                | C/T | 05q | T | 0.422727273 | 0.418918919 | 0.925722 |
| rs2076530  | BTNL2          | A/G | 06p | G | 0.396396396 | 0.401785714 | 0.925738 |
| rs6501878  | QRICH2         | A/G | 17q | G | 0.277777778 | 0.282828283 | 0.925819 |
| rs957998   | LOC133874      | C/G | 05q | G | 0.486607143 | 0.491071429 | 0.925947 |
| rs1052067  | PMF1           | A/G | 01q | A | 0.290178571 | 0.294642857 | 0.92606  |
| rs11858113 | CASC5          | C/T | 15q | C | 0.378378378 | 0.372727273 | 0.926077 |
| rs4807840  | ACSBG2         | C/T | 19p | T | 0.316964286 | 0.31981982  | 0.926343 |
| rs2058447  |                | C/T | 07q | C | 0.423423423 | 0.419642857 | 0.92676  |
| rs7776426  | C6orf191       | A/C | 06q | C | 0.491071429 | 0.495495496 | 0.926898 |
| rs10781634 | KIAA0692       | C/T | 12q | T | 0.396396396 | 0.391891892 | 0.9271   |
| rs2640779  | EXPH5          | A/G | 11q | A | 0.212264151 | 0.215686274 | 0.927141 |
| rs3088190  | ART4           | C/G | 12p | C | 0.09047619  | 0.089622641 | 0.927445 |
| rs1057066  | LRRC17, FBXL13 | C/G | 07q | C | 0.103603604 | 0.101851852 | 0.927476 |
| rs3750944  | C11orf56       | A/G | 11p | G | 0.463963964 | 0.468468469 | 0.927614 |
| rs8010911  | SYNE2          | C/G | 14q | G | 0.144144144 | 0.147321429 | 0.92773  |
| rs3744998  | KIAA1632       | A/G | 18q | A | 0.410714286 | 0.415178571 | 0.927744 |
| rs1867699  |                | A/C | 19q | A | 0.486486486 | 0.490990991 | 0.927963 |
| rs3745009  | SLC14A2        | C/T | 18q | T | 0.464285714 | 0.459821429 | 0.928276 |
| rs9932332  |                | A/G | 16q | G | 0.212264151 | 0.208333333 | 0.928465 |
| rs2820312  | LMOD1          | A/G | 01q | A | 0.288288288 | 0.292792793 | 0.928488 |
| rs11246020 | SIRT3          | A/G | 11p | A | 0.234234234 | 0.232142857 | 0.928548 |
| rs11664077 |                | A/G | 18q | G | 0.218181818 | 0.223214286 | 0.928636 |
| rs6679793  | FCRL5          | A/G | 01q | A | 0.242857143 | 0.238095238 | 0.92883  |
| rs3177676  | C1orf105       | A/G | 01q | G | 0.177272727 | 0.174107143 | 0.929226 |
| rs4889261  | PKD1L2         | A/G | 16q | A | 0.215789474 | 0.212121212 | 0.929373 |
| rs4072393  | TMC7           | C/T | 16p | C | 0.397321429 | 0.392857143 | 0.929501 |
| rs4242746  | PITRM1         | C/T | 10p | T | 0.299107143 | 0.303571429 | 0.929671 |



|            |                     |     |     |   |             |             |          |
|------------|---------------------|-----|-----|---|-------------|-------------|----------|
| rs10141053 | AHNAK2              | C/T | 14q | T | 0.482142857 | 0.47706422  | 0.929677 |
| rs7103810  |                     | A/G | 11p | A | 0.160714286 | 0.157657658 | 0.929693 |
| rs3176975  | APOH                | G/T | 17q | T | 0.21875     | 0.21559633  | 0.929716 |
| rs1580298  |                     | C/G | 15q | C | 0.357142857 | 0.352678571 | 0.929826 |
| rs12421329 | NDUFV1, C11orf72    | G/T | 11q | T | 0.368181818 | 0.370535714 | 0.930096 |
| rs2303345  | TTLL5               | C/T | 14q | C | 0.363636364 | 0.362385321 | 0.930361 |
| rs10876706 |                     | A/C | 12q | A | 0.310810811 | 0.308035714 | 0.930444 |
| rs10782008 | KIAA1618            | A/G | 17q | G | 0.372727273 | 0.369369369 | 0.930446 |
| rs4843074  | AKAP13              | C/G | 15q | C | 0.339285714 | 0.342342342 | 0.930958 |
| rs1003645  | CCL23               | A/G | 17q | G | 0.229591837 | 0.225       | 0.93101  |
| rs4917     | AHSG                | C/T | 03q | T | 0.278947368 | 0.289156627 | 0.931149 |
| rs2160501  | C12orf55            | A/G | 12q | G | 0.486111111 | 0.481818182 | 0.931421 |
| rs655803   |                     | A/C | 01p | C | 0.495535714 | 0.491071429 | 0.93149  |
| rs4758168  | OR52E4              | A/G | 11p | G | 0.241071429 | 0.243243243 | 0.931643 |
| rs2228212  | HIVEP1              | C/G | 06p | G | 0.34375     | 0.346846847 | 0.931821 |
| rs7813     | GEMIN4              | C/T | 17p | C | 0.410714286 | 0.40625     | 0.931942 |
| rs910925   | GEMIN4              | C/G | 17p | C | 0.410714286 | 0.40625     | 0.931942 |
| rs6601136  |                     | A/G | 05q | A | 0.193693694 | 0.191964286 | 0.932135 |
| rs9382658  | DST                 | A/G | 06p | A | 0.441964286 | 0.4375      | 0.932293 |
| rs11896016 | COLEC11             | C/T | 02p | T | 0.26146789  | 0.263636364 | 0.932338 |
| rs415793   | BAZ2B               | A/G | 02q | A | 0.209821429 | 0.205357143 | 0.93249  |
| rs9518825  | FLJ40176, LOC643677 | C/T | 13q | T | 0.138392857 | 0.136363636 | 0.932668 |
| rs2069569  | TG                  | C/T | 08q | T | 0.388392857 | 0.392857143 | 0.93281  |
| rs356969   |                     | C/G | 06p | G | 0.294642857 | 0.297297297 | 0.93284  |
| rs782572   | PNPT1               | C/T | 02p | C | 0.5         | 0.495495495 | 0.933321 |
| rs6702823  | C1orf71             | C/T | 01q | T | 0.102678571 | 0.105504587 | 0.933342 |
| rs2157453  |                     | A/G | 01q | A | 0.232142857 | 0.22972973  | 0.933343 |
| rs1019747  | ADAMTS16            | C/T | 05p | C | 0.351351351 | 0.357142857 | 0.93365  |
| rs10832747 | hCG_1992539         | G/T | 11p | G | 0.353932584 | 0.353932584 | 0.933655 |
| rs6459166  | DST                 | C/G | 06p | G | 0.463963964 | 0.459821429 | 0.93384  |
| rs2373396  | MGC26647, ZNF804B   | C/G | 07q | C | 0.120535714 | 0.116071429 | 0.933912 |
| rs3760848  | ZNF667              | A/G | 19q | G | 0.191964286 | 0.189189189 | 0.934003 |
| rs11713004 |                     | A/G | 03q | A | 0.388392857 | 0.392857143 | 0.934049 |
| rs1009668  | TMEM63A             | A/G | 01q | A | 0.122727273 | 0.120535714 | 0.934444 |
| rs1003995  | RTP4                | A/C | 03q | A | 0.333333333 | 0.328828829 | 0.934549 |
| rs2302188  | CEACAM21            | A/G | 19q | A | 0.223214286 | 0.225225225 | 0.934653 |
| rs6427504  | ATP1A4              | A/G | 01q | G | 0.285714286 | 0.288990826 | 0.934864 |

|            |             |     |     |   |             |             |          |
|------------|-------------|-----|-----|---|-------------|-------------|----------|
| rs2303064  | SPINK5      | A/G | 05q | A | 0.135135135 | 0.133928571 | 0.934935 |
| rs4452075  | ZNF527      | A/G | 19q | G | 0.194444444 | 0.195454546 | 0.935194 |
| rs2981546  | HEG1        | C/T | 03q | T | 0.4375      | 0.441964286 | 0.935251 |
| rs627928   | RNASEL      | G/T | 01q | T | 0.47826087  | 0.474226804 | 0.93539  |
| rs6673851  |             | C/T | 01p | T | 0.351351351 | 0.354545455 | 0.935473 |
| rs10283100 | ENPP2       | A/G | 08q | A | 0.054545454 | 0.053571429 | 0.935724 |
| rs2242665  | SLC44A4     | A/G | 06p | G | 0.410714286 | 0.415178571 | 0.935926 |
| rs9353689  | MDN1        | A/C | 06q | A | 0.495535714 | 0.491071429 | 0.935994 |
| rs1800450  | MBL2        | A/G | 10q | A | 0.146788991 | 0.15        | 0.936001 |
| rs5400     | SLC2A2      | C/T | 03q | T | 0.138392857 | 0.136363636 | 0.93654  |
| rs11171280 |             | A/C | 12q | A | 0.303571429 | 0.308035714 | 0.936565 |
| rs3859494  | ZNF813      | A/G | 19q | G | 0.098214286 | 0.1         | 0.936678 |
| rs2452524  | ATP8B4      | G/T | 15q | G | 0.303571429 | 0.309090909 | 0.936686 |
| rs4758443  | DCHS1       | A/G | 11p | A | 0.355855856 | 0.352678571 | 0.936784 |
| rs1837950  | LOC729184   | A/G | 10q | A | 0.294642857 | 0.299107143 | 0.936908 |
| rs10838095 | OR51Q1      | A/G | 11p | A | 0.383928571 | 0.387387387 | 0.937113 |
| rs1801280  | NAT2        | C/T | 08p | T | 0.486238532 | 0.490909091 | 0.93728  |
| rs9947055  | C18orf26    | A/C | 18q | A | 0.450892857 | 0.445945946 | 0.937317 |
| rs7736962  |             | A/C | 05q | C | 0.178571429 | 0.175675676 | 0.937562 |
| rs3810110  | SIGLEC12    | A/G | 19q | G | 0.359813084 | 0.365740741 | 0.937753 |
| rs10742809 | OR52E6      | A/C | 11p | C | 0.339285714 | 0.336363636 | 0.937766 |
| rs1671064  | ACTN3       | C/T | 11q | C | 0.46875     | 0.464285714 | 0.938018 |
| rs9364382  | C6orf54     | C/G | 06q | C | 0.387387387 | 0.383928571 | 0.938618 |
| rs3812475  | TRMT12      | C/T | 08q | T | 0.495535714 | 0.5         | 0.93907  |
| rs1999663  | C20orf114   | C/G | 20q | C | 0.459821429 | 0.464285714 | 0.939724 |
| rs3951216  | LY75        | C/G | 02q | C | 0.489795918 | 0.485       | 0.93989  |
| rs2061824  | AKAP13      | C/T | 15q | C | 0.339285714 | 0.342342342 | 0.940037 |
| rs3828054  | TUFT1       | C/T | 01q | C | 0.130630631 | 0.127272727 | 0.940079 |
| rs11978101 | SDK1        | A/G | 07p | A | 0.314285714 | 0.311320755 | 0.940191 |
| rs4950355  |             | C/T | 01q | T | 0.292792793 | 0.299065421 | 0.940265 |
| rs540874   | ACTN3, CTSF | C/T | 11q | T | 0.468468469 | 0.464285714 | 0.940553 |
| rs1264303  | VARS2       | C/T | 06p | C | 0.381818182 | 0.383928571 | 0.940558 |
| rs1053807  | LOC339778   | A/G | 02p | A | 0.464285714 | 0.46875     | 0.940591 |
| rs4299811  | LOC442227   | C/T | 06q | C | 0.443396226 | 0.444954128 | 0.940673 |
| rs618838   | ACTN3       | C/T | 11q | T | 0.468468469 | 0.464285714 | 0.94081  |
| rs10511208 |             | A/T | 03q | T | 0.333333333 | 0.328828829 | 0.940884 |
| rs9639393  | DNAH11      | A/G | 07p | A | 0.40625     | 0.410714286 | 0.940906 |

|            |           |     |     |   |             |             |          |
|------------|-----------|-----|-----|---|-------------|-------------|----------|
| rs1372000  | C13orf24  | C/T | 13q | C | 0.252293578 | 0.252293578 | 0.941013 |
| rs10839658 | OR2D3     | A/C | 11p | C | 0.357142857 | 0.36036036  | 0.941185 |
| rs7519753  |           | C/T | 01q | C | 0.254464286 | 0.258928571 | 0.941306 |
| rs11202902 | ACTA2     | A/T | 10q | T | 0.138392857 | 0.140909091 | 0.941464 |
| rs2073154  | OR12D2    | C/G | 06p | C | 0.423423423 | 0.428571429 | 0.941625 |
| rs375947   | IL12RB1   | A/G | 19p | G | 0.333333333 | 0.334821429 | 0.941911 |
| rs3754274  | DNASE2B   | C/T | 01p | T | 0.286363636 | 0.292792793 | 0.94196  |
| rs1043886  | CARS2     | A/C | 13q | C | 0.122727273 | 0.125       | 0.942126 |
| rs566655   | LAMA1     | A/C | 18p | C | 0.247747748 | 0.247747748 | 0.942533 |
| rs7527462  |           | C/G | 01q | G | 0.232142857 | 0.22972973  | 0.942882 |
| rs1544624  |           | C/G | 02p | G | 0.366071429 | 0.361607143 | 0.942899 |
| rs10417536 | LOC729966 | C/G | 19p | C | 0.325892857 | 0.328828829 | 0.942953 |
| rs668556   | MACF1     | C/G | 01p | C | 0.423423423 | 0.419642857 | 0.943128 |
| rs11229411 | OR5B3     | C/T | 11q | T | 0.366071429 | 0.363636364 | 0.943188 |
| rs578208   | CEP192    | C/T | 18p | T | 0.360824742 | 0.366666667 | 0.943371 |
| rs9488270  |           | A/G | 06q | A | 0.104545454 | 0.108108108 | 0.943406 |
| rs7430363  |           | A/C | 03p | C | 0.198113208 | 0.195652174 | 0.943781 |
| rs11167600 |           | C/G | 05q | G | 0.424107143 | 0.428571429 | 0.944073 |
| rs721005   | CRISPLD2  | C/G | 16q | G | 0.359090909 | 0.364864865 | 0.944658 |
| rs1873379  | C15orf39  | C/G | 15q | G | 0.254545455 | 0.256756757 | 0.945027 |
| rs2794763  | HEATR1    | A/G | 01q | A | 0.400900901 | 0.401785714 | 0.945307 |
| rs227368   | MANBA     | A/G | 04q | A | 0.495535714 | 0.495535714 | 0.945418 |
| rs7598922  | DHX57     | C/T | 02p | T | 0.328828829 | 0.333333333 | 0.94543  |
| rs3928777  | KIAA0649  | A/G | 09q | G | 0.209090909 | 0.205357143 | 0.945838 |
| rs550604   |           | A/G | 15q | A | 0.283783784 | 0.288288288 | 0.946083 |
| rs6703267  | C1orf162  | A/G | 01p | A | 0.238738739 | 0.23853211  | 0.946127 |
| rs1863473  |           | G/T | 18q | T | 0.09375     | 0.094594595 | 0.946147 |
| rs4392912  | LOC730783 | A/G | 08q | G | 0.395454546 | 0.400900901 | 0.946271 |
| rs2619844  | KIAA0947  | C/G | 05p | G | 0.310810811 | 0.306306306 | 0.946424 |
| rs4844573  | C4BPA     | C/T | 01q | C | 0.352678571 | 0.355855856 | 0.946717 |
| rs3748361  | RPGRIP1   | C/G | 14q | C | 0.396396396 | 0.392857143 | 0.946804 |
| rs1358577  |           | A/G | 01p | G | 0.348214286 | 0.34375     | 0.946987 |
| rs4786026  |           | A/G | 16p | A | 0.486607143 | 0.482142857 | 0.946996 |
| rs4712138  | DST       | C/T | 06p | C | 0.418918919 | 0.415178571 | 0.947233 |
| rs11965538 | ZNF187    | A/G | 06p | A | 0.136363636 | 0.139423077 | 0.947314 |
| rs2240804  | DPCR1     | C/T | 06p | T | 0.366071429 | 0.361607143 | 0.947386 |
| rs3887954  | KRT3      | C/G | 12q | G | 0.34375     | 0.339285714 | 0.947706 |

|            |                    |     |     |   |             |             |          |
|------------|--------------------|-----|-----|---|-------------|-------------|----------|
| rs6505882  |                    | C/G | 18p | C | 0.272727273 | 0.271028037 | 0.947714 |
| rs1875845  | LCA5               | C/T | 06q | T | 0.3125      | 0.318181818 | 0.947764 |
| rs2231142  | ABCG2              | A/C | 04q | A | 0.107142857 | 0.108108108 | 0.948395 |
| rs2760118  | ALDH5A1            | A/G | 06p | A | 0.308035714 | 0.310810811 | 0.948406 |
| rs1539172  | C9orf93            | A/G | 09p | G | 0.473214286 | 0.46875     | 0.948614 |
| rs3747965  | DNTTIP2            | G/T | 01p | T | 0.357142857 | 0.361607143 | 0.948796 |
| rs11553061 |                    | C/T | 18q | C | 0.223214286 | 0.227272727 | 0.94896  |
| rs7157685  | MED6               | A/G | 14q | A | 0.15        | 0.153153153 | 0.948963 |
| rs3746319  | ZNF224             | C/T | 19q | T | 0.162162162 | 0.165178571 | 0.949017 |
| rs888930   | SHD                | A/G | 19p | G | 0.369369369 | 0.370535714 | 0.949084 |
| rs1611209  |                    | A/G | 06p | G | 0.3125      | 0.315315315 | 0.949319 |
| rs2326106  | DKFZp686l15217     | G/T | 06p | T | 0.236363636 | 0.237864078 | 0.94969  |
| rs3813853  | RBM12B             | A/G | 08q | A | 0.330357143 | 0.333333333 | 0.949745 |
| rs2526247  | SLC27A6            | G/T | 05q | G | 0.409090909 | 0.412037037 | 0.950196 |
| rs1532977  | LOC727857          | A/C | 17p | C | 0.159090909 | 0.162162162 | 0.950587 |
| rs2277119  | CYP39A1            | A/G | 06p | A | 0.281914894 | 0.284090909 | 0.950758 |
| rs10733133 | NID1               | C/T | 01q | T | 0.38317757  | 0.388888889 | 0.950765 |
| rs3733890  | BHMT               | A/G | 05q | A | 0.31981982  | 0.324324324 | 0.950818 |
| rs5215     | KCNJ11             | C/T | 11p | C | 0.375       | 0.370535714 | 0.95104  |
| rs10910879 | LOC646804          | A/C | 01q | C | 0.154545455 | 0.15625     | 0.951397 |
| rs490262   | CEP164             | A/G | 11q | A | 0.185714286 | 0.189814815 | 0.951444 |
| rs2839202  | C21orf57           | A/T | 21q | A | 0.276785714 | 0.279279279 | 0.95167  |
| rs2966952  | MTRR, FASTKD3      | C/T | 05p | T | 0.196428571 | 0.193693694 | 0.952198 |
| rs10828395 | ARMC3              | A/G | 10p | A | 0.207207207 | 0.205357143 | 0.952601 |
| rs3764022  | CLEC2D             | C/G | 12p | C | 0.308035714 | 0.310810811 | 0.952729 |
| rs9449444  | IBTK               | A/G | 06q | A | 0.225225225 | 0.223214286 | 0.95274  |
| rs4380004  |                    | C/T | 14q | T | 0.209821429 | 0.207207207 | 0.952919 |
| rs953767   | C6orf97            | A/G | 06q | A | 0.114678899 | 0.117117117 | 0.95325  |
| rs7116499  | LOC643753          | A/G | 11p | A | 0.441441441 | 0.436936937 | 0.953275 |
| rs2452600  | PDLIM5             | C/T | 04q | T | 0.339285714 | 0.334821429 | 0.953462 |
| rs2279854  | PTPLAD1, LOC732402 | A/C | 15q | C | 0.053571429 | 0.054054054 | 0.953516 |
| rs6519550  | CTA-221G9.4        | C/G | 22q | C | 0.122727273 | 0.120535714 | 0.953562 |
| rs1048943  | CYP1A1             | A/G | 15q | G | 0.053571429 | 0.054054054 | 0.953634 |
| rs499033   | OR10V1             | A/G | 11q | A | 0.094594595 | 0.09375     | 0.953886 |
| rs10750898 |                    | A/G | 11q | A | 0.368181818 | 0.366071429 | 0.953893 |
| rs11535853 | TG                 | C/T | 08q | T | 0.344036697 | 0.345794393 | 0.954024 |
| rs1243647  | RNASE9             | C/T | 14q | T | 0.186915888 | 0.183486239 | 0.954056 |

|            |                 |     |     |   |             |             |          |
|------------|-----------------|-----|-----|---|-------------|-------------|----------|
| rs2480345  | GPR158          | C/G | 10p | G | 0.292792793 | 0.290178571 | 0.954107 |
| rs1042577  | GAL             | A/G | 11q | A | 0.336363636 | 0.331818182 | 0.954283 |
| rs1488690  | SPATA22         | C/T | 17p | T | 0.186363636 | 0.183035714 | 0.95437  |
| rs257223   |                 | C/T | 05q | T | 0.421296296 | 0.422727273 | 0.954489 |
| rs9400289  | FLJ42177        | A/G | 06q | G | 0.302752294 | 0.303738318 | 0.954756 |
| rs2806639  | FRY             | A/G | 13q | A | 0.308035714 | 0.310810811 | 0.954921 |
| rs3844144  |                 | C/T | 11q | T | 0.14953271  | 0.148648649 | 0.955291 |
| rs9710059  |                 | A/G | 18q | G | 0.053571429 | 0.054054054 | 0.955338 |
| rs7930678  | OR5R1           | A/G | 11q | G | 0.258928571 | 0.256756757 | 0.955402 |
| rs570218   | C1orf175        | A/G | 01p | A | 0.207207207 | 0.209821429 | 0.955834 |
| rs564533   | ECAT1           | C/G | 06q | G | 0.111607143 | 0.112612613 | 0.95601  |
| rs2586514  | SLFN12          | A/G | 17q | A | 0.415178571 | 0.417431193 | 0.95645  |
| rs1863968  | ADAMTS16        | C/T | 05p | T | 0.352678571 | 0.357142857 | 0.956832 |
| rs2291343  | CDH7            | A/G | 18q | A | 0.310810811 | 0.306306306 | 0.957351 |
| rs4703706  |                 | C/G | 05q | G | 0.207207207 | 0.204545455 | 0.957831 |
| rs3739406  | FGL1            | A/G | 08p | A | 0.383495146 | 0.383838384 | 0.957875 |
| rs306634   | LOC645320       | A/G | 12p | A | 0.292792793 | 0.290178571 | 0.958025 |
| rs3739524  | PRUNE2          | G/T | 09q | G | 0.168181818 | 0.166666667 | 0.958271 |
| rs6767237  | ECE2, CAMK2N2   | A/G | 03q | G | 0.144144144 | 0.144144144 | 0.958486 |
| rs1043424  | DDOST, PINK1    | A/C | 01p | C | 0.261261261 | 0.259090909 | 0.958696 |
| rs2458     |                 | A/G | 08q | A | 0.245535714 | 0.243243243 | 0.958843 |
| rs2956114  | PDHX, APIP      | C/T | 11p | T | 0.352380952 | 0.349056604 | 0.958906 |
| rs3177429  |                 | A/G | 14q | A | 0.089285714 | 0.089285714 | 0.958945 |
| rs10911583 |                 | A/G | 01q | A | 0.354545454 | 0.352678571 | 0.959111 |
| rs11248871 |                 | A/C | 16p | A | 0.09009009  | 0.090909091 | 0.95951  |
| rs4079449  |                 | G/T | 05q | T | 0.321428571 | 0.31981982  | 0.959551 |
| rs570475   |                 | C/G | 06p | C | 0.475961538 | 0.473958333 | 0.959859 |
| rs2072575  | COPG2           | A/G | 07q | G | 0.481818182 | 0.477477478 | 0.960687 |
| rs6330     | NGFB            | C/T | 01p | T | 0.409090909 | 0.405405405 | 0.961135 |
| rs11594560 | DOCK1, FLJ45557 | A/G | 10q | A | 0.252252252 | 0.254464286 | 0.961162 |
| rs12303082 | LOC121006       | G/T | 12q | T | 0.3125      | 0.315315315 | 0.961268 |
| rs2286963  | ACADL           | G/T | 02q | G | 0.321428571 | 0.324324324 | 0.961466 |
| rs12236756 |                 | C/G | 09q | C | 0.345454545 | 0.342342342 | 0.961508 |
| rs6753459  | MGC13057        | C/T | 02q | T | 0.214285714 | 0.216216216 | 0.961946 |
| rs741158   | LOC339766       | G/T | 02q | T | 0.202702703 | 0.205357143 | 0.962065 |
| rs1056892  | CBR3            | A/G | 21q | A | 0.383928571 | 0.387387387 | 0.962096 |
| rs7409712  |                 | C/G | 20q | C | 0.146788991 | 0.144859813 | 0.962111 |

|            |           |     |     |   |             |             |          |
|------------|-----------|-----|-----|---|-------------|-------------|----------|
| rs436278   | KIAA1609  | C/G | 16q | C | 0.446428571 | 0.445454545 | 0.962338 |
| rs3760413  | EME1      | G/T | 17q | T | 0.102678571 | 0.103603604 | 0.962554 |
| rs3927459  | CR1L      | G/T | 01q | T | 0.428571429 | 0.428571429 | 0.962578 |
| rs1288775  | GATM      | A/T | 15q | A | 0.28125     | 0.279279279 | 0.962597 |
| rs7869523  | ROD1      | C/T | 09q | T | 0.458715596 | 0.462616822 | 0.962606 |
| rs3729961  |           | C/G | 05q | G | 0.125       | 0.121621622 | 0.962644 |
| rs1236913  | PTGS1     | C/T | 09q | T | 0.058035714 | 0.058035714 | 0.96266  |
| rs4510923  |           | C/T | 09q | T | 0.372727273 | 0.375       | 0.962787 |
| rs1131857  | CPOX      | A/C | 03q | C | 0.129464286 | 0.130630631 | 0.963194 |
| rs3810971  | MOV10L1   | C/T | 22q | T | 0.236607143 | 0.236607143 | 0.963803 |
| rs2297809  | CYP4B1    | A/G | 01p | A | 0.142857143 | 0.144144144 | 0.964013 |
| rs6451173  | FLJ25439  | A/G | 05p | A | 0.468181818 | 0.46875     | 0.964164 |
| rs1034268  | ZMYND12   | A/G | 01p | A | 0.305       | 0.315       | 0.964167 |
| rs27241    | ZNF434    | C/G | 16p | G | 0.258928571 | 0.258928571 | 0.964201 |
| rs10769224 | OR52N1    | C/T | 11p | T | 0.303571429 | 0.301801802 | 0.964251 |
| rs6976043  | LOC730441 | A/G | 07q | A | 0.107142857 | 0.107142857 | 0.964486 |
| rs6976813  | LOC730441 | A/C | 07q | A | 0.107142857 | 0.107142857 | 0.964486 |
| rs11016071 | MKI67     | A/G | 10q | G | 0.169642857 | 0.166666667 | 0.964942 |
| rs3177051  |           | C/T | 20p | C | 0.267857143 | 0.267857143 | 0.965357 |
| rs1805098  | HNF4G     | A/G | 08q | G | 0.441441441 | 0.446428571 | 0.965464 |
| rs1663564  | KIAA1033  | C/T | 12q | C | 0.094594595 | 0.09375     | 0.965566 |
| rs4747096  | ADAMTS14  | A/G | 10q | G | 0.153153153 | 0.154545455 | 0.965774 |
| rs652633   | ANKRD5    | A/T | 20p | A | 0.245535714 | 0.247747748 | 0.965783 |
| rs425876   | PRPH2     | C/T | 06p | C | 0.111607143 | 0.111607143 | 0.965819 |
| rs7212483  | KRT20     | C/T | 17q | T | 0.080357143 | 0.081081081 | 0.96597  |
| rs3758938  | TBX10     | G/T | 11q | G | 0.303571429 | 0.304545454 | 0.966141 |
| rs11045689 | LST-3TM12 | A/G | 12p | G | 0.3125      | 0.315315315 | 0.966192 |
| rs2416195  | FER       | A/T | 05q | T | 0.266055046 | 0.268867925 | 0.966539 |
| rs9405485  |           | A/G | 06p | A | 0.464285714 | 0.463963964 | 0.966576 |
| rs1524616  |           | A/G | 07q | G | 0.444954128 | 0.441441441 | 0.966796 |
| rs2301523  | MIAT      | A/G | 22q | A | 0.163636364 | 0.165178571 | 0.967459 |
| rs1801275  | IL4R      | A/G | 16p | G | 0.214285714 | 0.214285714 | 0.967465 |
| rs4524     | F5        | A/G | 01q | G | 0.3         | 0.299107143 | 0.967502 |
| rs7483122  | OR51B6    | C/T | 11p | C | 0.261261261 | 0.258928571 | 0.967717 |
| rs4988398  | BIK       | A/G | 22q | A | 0.136363636 | 0.135135135 | 0.967777 |
| rs3809611  | CCDC135   | A/G | 16q | A | 0.188118812 | 0.188679245 | 0.967873 |
| rs2918299  |           | A/G | 19p | A | 0.166666667 | 0.165178571 | 0.96805  |

|            |                                 |     |     |   |             |              |          |
|------------|---------------------------------|-----|-----|---|-------------|--------------|----------|
| rs2272955  | WFDC8                           | A/G | 20q | G | 0.0625      | 0.0625       | 0.968539 |
| rs197922   | GOSR2                           | A/G | 17q | A | 0.3125      | 0.310810811  | 0.969537 |
| rs11042023 |                                 | C/T | 11p | T | 0.37037037  | 0.369369369  | 0.969591 |
| rs7988661  | LMO7                            | A/C | 13q | A | 0.080357143 | 0.081081081  | 0.969592 |
| rs2238837  | RABL2B, MGC70863                | A/C | 22q | C | 0.392857143 | 0.391891892  | 0.969805 |
| rs11024357 | OTOG                            | C/G | 11p | C | 0.209821429 | 0.2117111712 | 0.970035 |
| rs4730283  | LAMB1                           | C/T | 07q | T | 0.392857143 | 0.391891892  | 0.970127 |
| rs7001845  |                                 | A/C | 08p | A | 0.222727273 | 0.223214286  | 0.970233 |
| rs1320308  | S100Z                           | G/T | 05q | T | 0.318181818 | 0.316964286  | 0.970577 |
| rs2277849  | ADAMTSL3                        | C/T | 15q | T | 0.297297297 | 0.299107143  | 0.97062  |
| rs1738023  | AKR7A3                          | A/G | 01p | A | 0.13963964  | 0.142857143  | 0.970622 |
| rs948615   | ZNF407                          | G/T | 18q | G | 0.138392857 | 0.138392857  | 0.970742 |
| rs7765781  | LPA                             | C/G | 06q | C | 0.352678571 | 0.353211009  | 0.970764 |
| rs12623569 | SPAG16                          | A/C | 02q | C | 0.303571429 | 0.303571429  | 0.970982 |
| rs3858340  | BAG3                            | C/T | 10q | T | 0.075892857 | 0.076576577  | 0.971008 |
| rs6032606  | ZNF335                          | C/G | 20q | C | 0.075892857 | 0.077272727  | 0.971774 |
| rs889248   | RGS7BP                          | C/T | 05q | T | 0.13963964  | 0.138392857  | 0.971809 |
| rs4082155  | SETD2                           | A/G | 03p | G | 0.464285714 | 0.464285714  | 0.97192  |
| rs504593   | PRSS35                          | C/T | 06q | C | 0.111607143 | 0.111607143  | 0.9721   |
| rs10949946 | ZNF138, LOC730295,<br>LOC731265 | A/G | 07q | A | 0.46875     | 0.46875      | 0.972174 |
| rs2344828  |                                 | A/G | 11p | A | 0.325892857 | 0.325892857  | 0.972185 |
| rs6508750  | WDR87                           | C/T | 19q | T | 0.441441441 | 0.4375       | 0.972348 |
| rs2020870  | FMO2                            | A/G | 01q | G | 0.058558559 | 0.058035714  | 0.973198 |
| rs11618506 | FLJ32682                        | A/G | 13q | G | 0.081081081 | 0.080357143  | 0.973263 |
| rs11210969 | KLF17                           | A/T | 01p | A | 0.258928571 | 0.261261261  | 0.973333 |
| rs820142   |                                 | C/T | 17q | C | 0.482142857 | 0.481981982  | 0.973487 |
| rs3735478  | ZMIZ2                           | G/T | 07p | T | 0.261261261 | 0.258928571  | 0.97349  |
| rs1801692  | APOH                            | A/G | 17q | A | 0.053571429 | 0.053571429  | 0.973607 |
| rs6698109  | C1orf26                         | A/G | 01q | G | 0.361111111 | 0.359813084  | 0.973787 |
| rs11715636 | TGM4                            | C/G | 03p | C | 0.107142857 | 0.107142857  | 0.973893 |
| rs8087221  |                                 | C/T | 18q | T | 0.144144144 | 0.144144144  | 0.974057 |
| rs624786   |                                 | A/C | 11q | C | 0.482142857 | 0.481981982  | 0.974365 |
| rs10759326 |                                 | G/T | 09q | G | 0.174107143 | 0.174107143  | 0.974489 |
| rs10979601 | IKBKAP                          | C/T | 09q | T | 0.174107143 | 0.174107143  | 0.974489 |
| rs4747194  | CDH23                           | A/G | 10q | A | 0.259259259 | 0.26146789   | 0.974656 |
| rs10794324 | TMEM16J                         | C/T | 11p | T | 0.209821429 | 0.209821429  | 0.974876 |

|            |            |     |     |   |             |             |          |
|------------|------------|-----|-----|---|-------------|-------------|----------|
| rs857705   | OR6K3      | C/T | 01q | T | 0.234234234 | 0.232142857 | 0.974933 |
| rs9459350  | C6orf118   | C/G | 06q | G | 0.084821429 | 0.084821429 | 0.975149 |
| rs4670779  | LOC344382  | C/T | 02p | T | 0.299107143 | 0.299107143 | 0.975285 |
| rs1046934  | C1orf19    | A/C | 01q | C | 0.288288288 | 0.291666667 | 0.975369 |
| rs10509305 | STOX1      | A/C | 10q | C | 0.184684685 | 0.183035714 | 0.975689 |
| rs137794   | EFCAB6     | A/G | 22q | A | 0.112612613 | 0.111607143 | 0.975784 |
| rs9534264  | ZC3H13     | A/T | 13q | T | 0.28440367  | 0.284313726 | 0.975831 |
| rs12586792 |            | C/T | 14q | C | 0.214285714 | 0.216216216 | 0.975948 |
| rs1530144  | NDUFA10    | A/G | 02q | A | 0.396396396 | 0.392857143 | 0.976047 |
| rs3811506  |            | A/G | 01p | G | 0.133928571 | 0.135514019 | 0.97615  |
| rs2276102  | TMEM135    | C/T | 11q | C | 0.285714286 | 0.285714286 | 0.976396 |
| rs671539   | CDCP2      | A/G | 01p | G | 0.147321429 | 0.147321429 | 0.976725 |
| rs3129168  |            | G/T | 06p | T | 0.348214286 | 0.348214286 | 0.97673  |
| rs2070959  |            | A/G | 02q | G | 0.080357143 | 0.081081081 | 0.976743 |
| rs9350797  | PHIP       | A/G | 06q | G | 0.327272727 | 0.321428571 | 0.976839 |
| rs12595504 | NUT        | A/G | 15q | G | 0.111607143 | 0.111607143 | 0.976944 |
| rs1043673  | NLRP2      | A/C | 19q | A | 0.378378378 | 0.378378378 | 0.977042 |
| rs237597   | LOC729549  | A/G | 10p | A | 0.151785714 | 0.153153153 | 0.97731  |
| rs11070619 |            | C/T | 15q | T | 0.066964286 | 0.066964286 | 0.977959 |
| rs3116819  |            | C/T | 06p | C | 0.345454545 | 0.345454545 | 0.978104 |
| rs1136410  | PARP1      | C/T | 01q | C | 0.174107143 | 0.174107143 | 0.978116 |
| rs2254174  | C10orf27   | C/T | 10q | C | 0.111607143 | 0.112612613 | 0.978339 |
| rs1801274  | FCGR2A     | C/T | 01q | C | 0.495495495 | 0.495535714 | 0.978859 |
| rs1494558  | IL7R       | A/G | 05p | A | 0.340909091 | 0.337837838 | 0.979164 |
| rs2285738  | C7orf31    | A/G | 07p | A | 0.317757009 | 0.316037736 | 0.979171 |
| rs1042636  | CASR       | A/G | 03q | G | 0.080357143 | 0.080357143 | 0.979349 |
| rs9921412  | PKD1L3     | C/T | 16q | C | 0.25        | 0.25        | 0.979509 |
| rs7094610  | LRRC18     | A/C | 10q | A | 0.314814815 | 0.314814815 | 0.979511 |
| rs7516332  | INADL      | A/G | 01p | G | 0.473214286 | 0.473214286 | 0.979537 |
| rs591752   |            | A/G | 01q | A | 0.165178571 | 0.165178571 | 0.979546 |
| rs3739451  | SVEP1      | A/T | 09q | A | 0.18018018  | 0.183035714 | 0.979827 |
| rs6050249  | ACSS1      | C/T | 20p | T | 0.178571429 | 0.177272727 | 0.97984  |
| rs3751112  | RAB17      | A/G | 02q | G | 0.165178571 | 0.165178571 | 0.980035 |
| rs757110   | ABCC8      | G/T | 11p | G | 0.369369369 | 0.364864865 | 0.980055 |
| rs12437206 | C14orf143  | C/T | 14q | T | 0.1875      | 0.184684685 | 0.980185 |
| rs10511687 | KIAA1797   | A/G | 09p | G | 0.357142857 | 0.357142857 | 0.980218 |
| rs7782956  | tcag7.1093 | A/G | 07p | G | 0.200892857 | 0.200892857 | 0.980313 |



|            |           |     |     |   |             |             |          |
|------------|-----------|-----|-----|---|-------------|-------------|----------|
| rs160632   | RIOK2     | A/G | 05q | G | 0.419642857 | 0.419642857 | 0.980533 |
| rs30842    | GOT2      | G/T | 16q | T | 0.313636364 | 0.3125      | 0.980694 |
| rs778986   | FUT3      | A/G | 19p | A | 0.196428571 | 0.196428571 | 0.980873 |
| rs10749920 | EXPH5     | A/G | 11q | G | 0.178571429 | 0.178571429 | 0.980974 |
| rs4077930  | C3orf30   | C/T | 03q | T | 0.165178571 | 0.165178571 | 0.981053 |
| rs1185246  | MARVELD2  | C/T | 05q | T | 0.436363636 | 0.436936937 | 0.981168 |
| rs10489990 | CD207     | A/G | 02p | A | 0.34375     | 0.34375     | 0.981188 |
| rs10925085 | OR2G2     | C/T | 01q | C | 0.410714286 | 0.40990991  | 0.981277 |
| rs2307279  | PLA2G4C   | C/G | 19q | C | 0.0625      | 0.063063063 | 0.981488 |
| rs1809933  | ZDHHC11B  | A/G | 05p | G | 0.3         | 0.299107143 | 0.981682 |
| rs741006   | MAP2      | C/T | 02q | T | 0.071428571 | 0.071428571 | 0.981743 |
| rs11908093 | TMC2      | A/G | 20p | G | 0.102678571 | 0.102678571 | 0.981887 |
| rs6745497  |           | C/T | 02p | T | 0.116071429 | 0.116071429 | 0.982238 |
| rs4792311  | ELAC2     | A/G | 17p | A | 0.37244898  | 0.37244898  | 0.98229  |
| rs1657907  | C18orf54  | C/G | 18q | C | 0.067567568 | 0.067567568 | 0.982795 |
| rs8080100  | HELZ      | C/T | 17q | T | 0.244791667 | 0.247252747 | 0.982815 |
| rs9866564  | NAALADL2  | C/G | 03q | C | 0.22972973  | 0.22972973  | 0.982998 |
| rs1052500  | LOC130355 | A/G | 02q | A | 0.397321429 | 0.397321429 | 0.98316  |
| rs433640   |           | C/T | 11q | C | 0.133928571 | 0.133928571 | 0.983194 |
| rs1815739  | ACTN3     | C/T | 11q | T | 0.463963964 | 0.464285714 | 0.983226 |
| rs3122713  | FAM71A    | A/G | 01q | A | 0.15        | 0.148648649 | 0.983432 |
| rs3107275  | PHACS     | C/T | 11p | T | 0.419642857 | 0.419642857 | 0.983514 |
| rs8480     | MRPL9     | A/C | 01q | C | 0.468181818 | 0.46875     | 0.983599 |
| rs11229410 | OR5B3     | C/T | 11q | C | 0.363636364 | 0.363636364 | 0.983688 |
| rs3740955  | RAG1      | A/G | 11p | G | 0.328431373 | 0.328431373 | 0.983842 |
| rs3822346  |           | A/G | 05q | G | 0.427927928 | 0.428571429 | 0.984124 |
| rs3179249  |           | C/T | 06p | T | 0.443925234 | 0.445454546 | 0.984172 |
| rs2142661  | RIBC2     | C/T | 22q | T | 0.165178571 | 0.165178571 | 0.984295 |
| rs11157869 | GNG2      | G/T | 14q | T | 0.0625      | 0.063063063 | 0.984332 |
| rs7092182  | tAKR      | A/G | 10p | G | 0.071428571 | 0.071428571 | 0.984499 |
| rs2180314  | GSTA2     | C/G | 06p | C | 0.445945946 | 0.445454545 | 0.984595 |
| rs3134614  | MYCL1     | C/G | 01p | C | 0.125       | 0.126126126 | 0.984602 |
| rs877350   |           | C/T | 08q | C | 0.075892857 | 0.075892857 | 0.984849 |
| rs3796504  | SLAMF1    | G/T | 01q | T | 0.129464286 | 0.129464286 | 0.984852 |
| rs4255378  |           | A/T | 01q | A | 0.46875     | 0.46875     | 0.984899 |
| rs1657125  |           | G/T | 16p | G | 0.129464286 | 0.129464286 | 0.984913 |
| rs3764421  | ATAD5     | A/C | 17q | C | 0.112612613 | 0.112612613 | 0.985006 |

|            |                |     |     |   |             |             |          |
|------------|----------------|-----|-----|---|-------------|-------------|----------|
| rs1048621  | SDCBP2         | C/T | 20p | T | 0.276785714 | 0.276785714 | 0.985343 |
| rs2031640  | SACS           | A/T | 13q | T | 0.137614679 | 0.136792453 | 0.985467 |
| rs9617066  | MOV10L1        | A/T | 22q | T | 0.236607143 | 0.238738739 | 0.985506 |
| rs12419602 | OR52E8         | A/T | 11p | A | 0.36036036  | 0.361607143 | 0.985728 |
| rs8207     | PPIG           | A/G | 02q | G | 0.294642857 | 0.294642857 | 0.985738 |
| rs924326   | FLJ46688       | A/G | 12q | G | 0.494791667 | 0.494791667 | 0.985999 |
| rs647224   | RGSL2          | C/G | 01q | C | 0.066964286 | 0.066964286 | 0.986067 |
| rs3095150  | LOC646570      | A/G | 06p | G | 0.383928571 | 0.386363636 | 0.986137 |
| rs6503235  | WDR16          | A/G | 17p | G | 0.258928571 | 0.258928571 | 0.986504 |
| rs10950951 |                | C/T | 07p | T | 0.236607143 | 0.236607143 | 0.986617 |
| rs11836060 | C12orf64       | A/G | 12q | A | 0.169642857 | 0.169642857 | 0.986651 |
| rs537786   |                | A/G | 11q | G | 0.440909091 | 0.441964286 | 0.986661 |
| rs2230283  | GALNT4, WDR51B | A/G | 12q | A | 0.31981982  | 0.321100917 | 0.98667  |
| rs872665   | SVEP1          | C/T | 09q | T | 0.254901961 | 0.254716981 | 0.986754 |
| rs10869869 | LOC645225      | C/T | 09q | C | 0.459821429 | 0.459821429 | 0.986866 |
| rs1131262  | RYK            | A/G | 03q | A | 0.28125     | 0.281914894 | 0.98697  |
| rs6883562  | LOC134121      | C/G | 05p | G | 0.236607143 | 0.236607143 | 0.987051 |
| rs7555330  |                | A/G | 01p | G | 0.495495496 | 0.495412844 | 0.987141 |
| rs2306393  | MDM1           | C/T | 12q | C | 0.299107143 | 0.299107143 | 0.98728  |
| rs1052053  | PMF1           | A/G | 01q | G | 0.397321429 | 0.397321429 | 0.987495 |
| rs1021737  | CTH            | G/T | 01p | T | 0.308035714 | 0.308035714 | 0.987727 |
| rs8113504  | FLJ16287       | C/T | 19q | C | 0.123853211 | 0.125       | 0.987766 |
| rs6125     | SELP           | A/G | 01q | A | 0.075892857 | 0.075892857 | 0.987817 |
| rs6017667  | SPINT4         | A/G | 20q | A | 0.405405405 | 0.405405405 | 0.987888 |
| rs1127470  | C6orf85        | A/T | 06p | T | 0.072072072 | 0.072072072 | 0.988054 |
| rs2301366  | SEMG1          | A/T | 20q | A | 0.225225225 | 0.224299065 | 0.98825  |
| rs3132580  | DPCR1          | C/T | 06p | T | 0.107142857 | 0.107142857 | 0.988313 |
| rs6591561  | MS4A4A         | A/G | 11q | G | 0.304545455 | 0.304545455 | 0.988457 |
| rs4911290  | C20orf185      | A/G | 20q | A | 0.348214286 | 0.346846847 | 0.988468 |
| rs6438869  | HEG1           | A/G | 03q | A | 0.324324324 | 0.325892857 | 0.988908 |
| rs11196389 | NRAP           | A/G | 10q | G | 0.135135135 | 0.135135135 | 0.989062 |
| rs12535348 | C7orf31        | C/T | 07p | T | 0.5         | 0.5         | 0.989139 |
| rs934945   | PER2           | A/G | 02q | A | 0.207207207 | 0.205357143 | 0.989423 |
| rs2241880  | ATG16L1        | C/T | 02q | T | 0.482142857 | 0.482142857 | 0.989432 |
| rs2258983  | SIGLEC9        | A/C | 19q | C | 0.419642857 | 0.418918919 | 0.989713 |
| rs11791889 |                | A/G | 09p | A | 0.382882883 | 0.383928571 | 0.989718 |
| rs1999240  | MYO3A          | A/C | 10p | C | 0.446428571 | 0.445945946 | 0.989728 |

|            |                      |     |     |   |             |             |          |
|------------|----------------------|-----|-----|---|-------------|-------------|----------|
| rs7296291  | LOC121006, LOC643275 | A/G | 12q | G | 0.310810811 | 0.310810811 | 0.989771 |
| rs3810161  | LOC388503            | A/G | 19p | A | 0.234042553 | 0.237373737 | 0.989979 |
| rs11790644 |                      | A/C | 09q | C | 0.351351351 | 0.351851852 | 0.990071 |
| rs1052030  | MYO7A                | C/T | 11q | C | 0.381818182 | 0.381818182 | 0.990126 |
| rs2736911  | ARMS2                | C/T | 10q | T | 0.171568628 | 0.172897196 | 0.990199 |
| rs329003   | PPP4R1               | A/G | 18p | G | 0.107142857 | 0.107142857 | 0.990212 |
| rs12449580 | AIPL1                | C/G | 17p | G | 0.205357143 | 0.205357143 | 0.990328 |
| rs1453542  | OR4D6                | C/G | 11q | G | 0.357142857 | 0.357142857 | 0.990372 |
| rs1522983  | LOC253820            | G/T | 03q | T | 0.071428571 | 0.070093458 | 0.990565 |
| rs2070862  | SERPINF2             | C/T | 17p | T | 0.205357143 | 0.205357143 | 0.990617 |
| rs9674961  | RNF213               | A/G | 17q | G | 0.34375     | 0.34375     | 0.990638 |
| rs3765148  | DHDH                 | C/T | 19q | T | 0.084821429 | 0.084821429 | 0.990651 |
| rs2250718  | EML1                 | A/G | 14q | A | 0.382882883 | 0.382882883 | 0.991026 |
| rs9267522  | BAT2                 | A/G | 06p | G | 0.189189189 | 0.189189189 | 0.991031 |
| rs6918     | CEECAM1              | A/C | 09q | C | 0.198198198 | 0.198198198 | 0.991249 |
| rs7406910  | HOXB7, HOXB8         | C/T | 17q | T | 0.098214286 | 0.098214286 | 0.991282 |
| rs7098592  |                      | A/C | 10q | A | 0.366071429 | 0.364864865 | 0.99129  |
| rs4382729  | C1orf140             | A/G | 01q | A | 0.169642857 | 0.169642857 | 0.991318 |
| rs3751143  | P2RX7                | G/T | 12q | G | 0.227678571 | 0.227678571 | 0.991436 |
| rs4646491  | CYP4B1               | C/T | 01p | T | 0.147321429 | 0.147321429 | 0.991469 |
| rs2276118  | CABP2                | A/G | 11q | G | 0.423423423 | 0.423423423 | 0.99165  |
| rs1816416  |                      | C/T | 19p | C | 0.058035714 | 0.058035714 | 0.991651 |
| rs28265    | ASCC2                | C/G | 22q | C | 0.072072072 | 0.071428571 | 0.991669 |
| rs7889839  |                      | A/G | 01q | G | 0.135135135 | 0.133928571 | 0.991803 |
| rs859098   | SLC44A3              | A/G | 01p | G | 0.259259259 | 0.259090909 | 0.992049 |
| rs3732209  | MAP3K2               | C/T | 02q | C | 0.299107143 | 0.3         | 0.992209 |
| rs9982824  |                      | A/G | 21q | G | 0.116071429 | 0.117117117 | 0.99225  |
| rs7619322  | IGSF10               | A/C | 03q | A | 0.247747748 | 0.247747748 | 0.992293 |
| rs2290228  | CALU                 | C/T | 07q | T | 0.133928571 | 0.133928571 | 0.992393 |
| rs7665748  | LOC729902            | A/G | 04q | G | 0.397321429 | 0.396396396 | 0.992439 |
| rs2274567  | CR1                  | A/G | 01q | G | 0.232142857 | 0.232142857 | 0.992446 |
| rs794001   | N4BP2                | A/G | 04p | G | 0.279279279 | 0.277777778 | 0.992499 |
| rs6032     | F5                   | A/G | 01q | G | 0.303571429 | 0.303571429 | 0.992531 |
| rs2270493  | ZNF597               | A/T | 16p | A | 0.066964286 | 0.066964286 | 0.992611 |
| rs4726514  | LOC730441            | A/T | 07q | T | 0.107142857 | 0.108108108 | 0.992694 |
| rs1567     | NCOA7                | G/T | 06q | G | 0.125       | 0.125       | 0.992803 |
| rs1678160  | SP100                | A/G | 02q | G | 0.303571429 | 0.303571429 | 0.992809 |

|            |                                                                                      |     |     |   |             |             |          |
|------------|--------------------------------------------------------------------------------------|-----|-----|---|-------------|-------------|----------|
| rs654093   | ALKBH8                                                                               | C/T | 11q | C | 0.459821429 | 0.459821429 | 0.992911 |
| rs4548513  | CTNNA3                                                                               | C/T | 10q | T | 0.383928571 | 0.383928571 | 0.992968 |
| rs7966110  | MUC19                                                                                | C/G | 12q | C | 0.450892857 | 0.450892857 | 0.993084 |
| rs7633797  | LOC200810                                                                            | A/G | 03q | A | 0.375       | 0.375       | 0.993092 |
| rs11190305 | DNMBP                                                                                | A/C | 10q | C | 0.375       | 0.375       | 0.99313  |
| rs682632   | TEK                                                                                  | G/T | 09p | T | 0.058035714 | 0.058035714 | 0.993211 |
| rs7935564  | TRIM22                                                                               | A/G | 11p | G | 0.419642857 | 0.419642857 | 0.993214 |
| rs1836270  |                                                                                      | C/T | 07q | C | 0.357142857 | 0.355855856 | 0.993224 |
|            | LOC729788, LOC729792,<br>LOC730400, LOC730401,<br>LOC730408, LOC730409,<br>LOC732021 |     |     |   |             |             |          |
| rs2523898  |                                                                                      | C/T | 06p | T | 0.481308411 | 0.480769231 | 0.993246 |
| rs2279517  | CCDC8                                                                                | C/G | 19q | C | 0.053571429 | 0.053571429 | 0.993417 |
| rs7778776  |                                                                                      | A/G | 07q | G | 0.446428571 | 0.446428571 | 0.993539 |
| rs250429   | SLC35A4                                                                              | A/G | 05q | A | 0.254464286 | 0.256756757 | 0.993602 |
| rs610308   | PPP1R15A                                                                             | C/T | 19q | C | 0.392857143 | 0.391891892 | 0.993609 |
| rs3856154  | LOC127602                                                                            | C/T | 01q | T | 0.321428571 | 0.321428571 | 0.993621 |
| rs2274531  | GPA33                                                                                | A/G | 01q | A | 0.09375     | 0.09375     | 0.993691 |
| rs10883979 | C10orf79                                                                             | A/G | 10q | G | 0.063063063 | 0.063063063 | 0.993803 |
| rs7896053  | RPP38, C10orf111                                                                     | C/T | 10p | T | 0.102678571 | 0.103603604 | 0.993836 |
| rs1051695  | AKAP6                                                                                | A/G | 14q | A | 0.441964286 | 0.441964286 | 0.993981 |
| rs3742704  | GPR65                                                                                | G/T | 14q | G | 0.102678571 | 0.102678571 | 0.993999 |
| rs1337     | RNF175                                                                               | C/G | 04q | C | 0.174107143 | 0.174107143 | 0.994153 |
| rs232777   | MYSM1                                                                                | C/T | 01p | T | 0.223214286 | 0.223214286 | 0.994153 |
| rs4667591  | LRP2                                                                                 | G/T | 02q | T | 0.209821429 | 0.209821429 | 0.994157 |
| rs888197   | DUSP16                                                                               | C/T | 12p | C | 0.357142857 | 0.357142857 | 0.994264 |
| rs6537825  | TRIM33                                                                               | A/G | 01p | A | 0.089285714 | 0.089285714 | 0.994347 |
| rs293119   |                                                                                      | C/T | 05p | T | 0.339285714 | 0.339285714 | 0.994499 |
| rs1057278  | TTLL3                                                                                | A/G | 03p | A | 0.135135135 | 0.136363636 | 0.994615 |
| rs11628102 |                                                                                      | C/T | 14q | T | 0.084821429 | 0.084821429 | 0.994653 |
| rs1961760  | BDP1                                                                                 | A/T | 05q | T | 0.486607143 | 0.486607143 | 0.994653 |
| rs4777310  | LOC729611                                                                            | A/G | 15q | G | 0.064220184 | 0.064220184 | 0.994659 |
| rs7871785  |                                                                                      | A/G | 09q | G | 0.435779817 | 0.436936937 | 0.994907 |
| rs609290   | CYP4F12                                                                              | C/T | 19p | T | 0.0625      | 0.0625      | 0.994915 |
| rs609636   | CYP4F12                                                                              | C/T | 19p | T | 0.0625      | 0.0625      | 0.994915 |
| rs614766   |                                                                                      | A/T | 01p | T | 0.472972973 | 0.472477064 | 0.994993 |
| rs2295005  | HINT3                                                                                | C/G | 06q | G | 0.486486487 | 0.486486487 | 0.99501  |

|            |                   |     |     |   |             |             |          |
|------------|-------------------|-----|-----|---|-------------|-------------|----------|
| rs1050767  | MKI67             | A/C | 10q | C | 0.171171171 | 0.169642857 | 0.995048 |
| rs970382   | OR4E2             | A/G | 14q | A | 0.200892857 | 0.202702703 | 0.99508  |
| rs8181529  | OR52N2            | G/T | 11p | T | 0.375       | 0.375       | 0.995123 |
| rs10152546 | CCDC32            | A/T | 15q | A | 0.468181818 | 0.468181818 | 0.995409 |
| rs1864345  | FRMPD2            | C/T | 10q | C | 0.22        | 0.221153846 | 0.995538 |
| rs535955   |                   | A/G | 11q | A | 0.178571429 | 0.178571429 | 0.995558 |
| rs2297336  | TCTE1             | A/G | 06p | G | 0.148648649 | 0.148648649 | 0.995624 |
| rs8031046  | TMC3              | C/T | 15q | T | 0.053571429 | 0.053571429 | 0.995682 |
| rs7245429  | FBN3              | G/T | 19p | T | 0.370535714 | 0.370535714 | 0.995746 |
| rs267746   | DUSP27            | A/C | 01q | C | 0.160714286 | 0.160714286 | 0.995786 |
| rs2252471  |                   | C/G | 08p | C | 0.433962264 | 0.433962264 | 0.995893 |
| rs10439661 |                   | A/C | 21q | C | 0.370535714 | 0.370535714 | 0.995945 |
| rs2278607  | AHNAK2, LOC730269 | A/G | 14q | G | 0.054054054 | 0.053571429 | 0.996139 |
| rs6712473  | LTBP1             | G/T | 02p | G | 0.477678571 | 0.477678571 | 0.996164 |
| rs2640218  |                   | A/G | 11q | A | 0.103603604 | 0.103603604 | 0.996178 |
| rs2295322  | CHMP4A            | A/G | 14q | G | 0.450892857 | 0.450892857 | 0.996197 |
| rs7531792  |                   | A/G | 01q | G | 0.473214286 | 0.472972973 | 0.996315 |
| rs1785928  | ELP2              | C/T | 18q | T | 0.29245283  | 0.29245283  | 0.996352 |
| rs10470540 |                   | C/T | 03q | T | 0.459821429 | 0.459821429 | 0.996352 |
| rs2297775  | GON4L             | C/T | 01q | C | 0.3125      | 0.3125      | 0.997178 |
| rs818817   | SLC22A14          | C/T | 03p | T | 0.111607143 | 0.112612613 | 0.997403 |
| rs11809582 |                   | A/G | 01q | A | 0.066964286 | 0.067567568 | 0.9975   |
| rs998928   |                   | A/G | 07p | G | 0.418918919 | 0.418918919 | 0.997517 |
| rs6949082  | HYAL4             | G/T | 07q | T | 0.165178571 | 0.165178571 | 0.997664 |
| rs3738671  | TRIT1             | A/T | 01p | A | 0.058558559 | 0.059090909 | 0.997685 |
| rs2227928  | ATR               | C/T | 03q | T | 0.419642857 | 0.419642857 | 0.997713 |
| rs7775397  | C6orf10           | G/T | 06p | G | 0.089285714 | 0.089285714 | 0.99773  |
| rs1265754  | C6orf10           | A/T | 06p | T | 0.089285714 | 0.089285714 | 0.99773  |
| rs12446322 | FLJ41766          | A/G | 16p | A | 0.058035714 | 0.058558559 | 0.997733 |
| rs2276449  |                   | C/T | 22q | T | 0.191588785 | 0.190909091 | 0.997907 |
| rs2279027  | TBC1D1            | A/G | 04p | A | 0.400900901 | 0.4         | 0.998164 |
| rs9295924  |                   | A/G | 06p | A | 0.1875      | 0.1875      | 0.998337 |
| rs296091   | ZNF91             | C/T | 19p | C | 0.058035714 | 0.058035714 | 0.998417 |
| rs25901    | MYO10             | C/G | 05p | C | 0.316964286 | 0.316964286 | 0.998496 |
| rs235468   | BAT2D1            | C/G | 01q | G | 0.207207207 | 0.204545455 | 0.998724 |
| rs5030084  | KNG1              | C/G | 03q | G | 0.056074766 | 0.056603774 | 0.998751 |
| rs2070661  | NPAT              | A/G | 11q | G | 0.427272727 | 0.427927928 | 0.998793 |

|            |          |     |     |   |             |             |          |
|------------|----------|-----|-----|---|-------------|-------------|----------|
| rs2291260  | GOLGA3   | A/G | 12q | G | 0.276785714 | 0.276785714 | 0.998864 |
| rs2437150  | C1orf124 | A/G | 01q | G | 0.382882883 | 0.383928571 | 0.998868 |
| rs523104   | CASP5    | C/G | 11q | C | 0.472972973 | 0.473214286 | 0.998874 |
| rs1128864  | ART3     | C/T | 04q | T | 0.196428571 | 0.196428571 | 0.998981 |
| rs7143783  | RCOR1    | A/G | 14q | G | 0.163636364 | 0.163636364 | 0.999289 |
| rs10517577 | RNF175   | C/T | 04q | C | 0.205357143 | 0.205357143 | 0.999341 |
| rs3128853  | OR12D2   | C/T | 06p | C | 0.058035714 | 0.058035714 | 0.999423 |
| rs3762648  | DPPA4    | A/G | 03q | G | 0.495535714 | 0.495535714 | 0.999849 |
| rs9471969  | TNRC5    | G/T | 06p | T | 0.245535714 | 0.245535714 | 0.99986  |
| rs1011048  | CLCA4    | A/T | 01p | T | 0           | 0           |          |
| rs1027819  | COL24A1  | C/T | 01p | T | 0.004545455 | 0.004545455 |          |
| rs1047376  | ABCA4    | A/T | 01p | A | 0           | 0           |          |
| rs1048401  | GBP1     | A/G | 01p | G | 0.004464286 | 0.031531532 |          |
| rs10489962 | FHAD1    | A/G | 01p | G | 0.049107143 | 0.022321429 |          |
| rs10493784 | COL24A1  | A/C | 01p | C | 0           | 0           |          |
| rs10494226 |          | A/G | 01p | A | 0           | 0.008928571 |          |
| rs1064567  | BRDT     | A/C | 01p | C | 0           | 0           |          |
| rs10789428 | ERMAPP   | C/G | 01p | G | 0           | 0           |          |
| rs10801999 | CASQ2    | C/T | 01p | T | 0           | 0.004464286 |          |
| rs10857971 | PPM1J    | C/T | 01p | C | 0.004464286 | 0           |          |
| rs10909820 | C1orf174 | A/C | 01p | A | 0           | 0.013392857 |          |
| rs10910021 | CCDC27   | C/G | 01p | G | 0.005154639 | 0.056701031 |          |
| rs10917405 |          | A/G | 01p | A | 0           | 0           |          |
| rs10922938 | ZNF644   | A/G | 01p | A | 0           | 0           |          |
| rs10927776 | FHAD1    | C/T | 01p | T | 0.004464286 | 0           |          |
| rs11121969 | AADA3L3  | C/T | 01p | T | 0.044642857 | 0.044642857 |          |
| rs11165091 | ARHGAP29 | A/G | 01p | A | 0           | 0           |          |
| rs11207463 | FLJ10986 | C/G | 01p | G | 0.009009009 | 0.009009009 |          |
| rs1134764  | INADL    | C/T | 01p | C | 0           | 0           |          |
| rs11466110 | NGFB     | A/G | 01p | A | 0           | 0           |          |
| rs11466111 | NGFB     | A/G | 01p | A | 0.013392857 | 0.017857143 |          |
| rs1149172  | ATXN7L2  | A/G | 01p | A | 0           | 0           |          |
| rs11572243 | CYP2J2   | A/G | 01p | G | 0.008928571 | 0           |          |
| rs12063601 |          | G/T | 01p | G | 0           | 0           |          |
| rs12091554 | LUZP1    | A/C | 01p | C | 0.004464286 | 0           |          |
| rs12093500 | NPHP4    | C/G | 01p | C | 0           | 0           |          |
| rs12094543 | ZMYM4    | A/G | 01p | G | 0.013392857 | 0.026785714 |          |

|            |             |     |     |   |             |             |
|------------|-------------|-----|-----|---|-------------|-------------|
| rs12096782 | OVGP1       | A/G | 01p | A | 0           | 0           |
| rs12401979 | hCG_2036596 | A/G | 01p | A | 0.03125     | 0.075892857 |
| rs1258021  | MKNK1       | A/G | 01p | A | 0           | 0           |
| rs1338314  | SPATA6      | C/T | 01p | T | 0.035714286 | 0.026785714 |
| rs1407134  | CCDC28B     | C/T | 01p | T | 0.040540541 | 0.035714286 |
| rs1541775  |             | A/G | 01p | A | 0           | 0           |
| rs1635712  | KIAA0319L   | A/G | 01p | A | 0.004464286 | 0.004464286 |
| rs1655518  | C1orf175    | C/T | 01p | T | 0.009174312 | 0           |
| rs1755373  | LOC440570   | C/G | 01p | G | 0           | 0.004545455 |
| rs1762111  | ABCA4       | C/T | 01p | C | 0           | 0.004464286 |
| rs1800553  | ABCA4       | A/G | 01p | A | 0.008928571 | 0.013392857 |
| rs1802373  | ZRANB2      | C/T | 01p | C | 0           | 0           |
| rs1804298  | RPL11       | A/G | 01p | G | 0           | 0           |
| rs1934294  |             | A/G | 01p | A | 0           | 0.004545454 |
| rs1971089  |             | A/T | 01p | T | 0           | 0.004504505 |
| rs1999272  | ARHGAP29    | C/T | 01p | C | 0           | 0           |
| rs2070123  | IFI44       | C/T | 01p | C | 0.049107143 | 0.102678571 |
| rs2231580  | CLCA4       | C/T | 01p | T | 0.004464286 | 0           |
| rs2231604  | CLCA4       | C/G | 01p | C | 0.004464286 | 0.004464286 |
| rs2236387  | ADPRHL2     | C/T | 01p | T | 0.013392857 | 0.008928571 |
| rs2249265  | IGSF2       | C/T | 01p | T | 0.03125     | 0.022321429 |
| rs2271885  | SLC16A4     | A/C | 01p | C | 0.040178571 | 0.031531532 |
| rs2273346  | MASP2       | C/T | 01p | C | 0.013513513 | 0.013513513 |
| rs2274260  | TNNI3K      | C/T | 01p | T | 0           | 0           |
| rs2274540  | USP24       | A/G | 01p | A | 0           | 0           |
| rs2275408  | MRPL37      | C/G | 01p | G | 0           | 0.004672897 |
| rs2282333  |             | A/C | 01p | A | 0.004504504 | 0           |
| rs2282440  | SDC3        | C/T | 01p | T | 0.004464286 | 0.004464286 |
| rs2297881  | KIF1B       | C/T | 01p | C | 0.013392857 | 0.022321429 |
| rs2303193  | ELA2A       | C/T | 01p | C | 0.004464286 | 0.008928571 |
| rs2304306  | ACOT11      | A/G | 01p | A | 0.013392857 | 0.026785714 |
| rs2304778  | LZIC        | C/T | 01p | T | 0           | 0           |
| rs235247   | VPS13D      | G/T | 01p | T | 0.022321429 | 0.022522523 |
| rs2484677  |             | C/G | 01p | C | 0           | 0           |
| rs2486803  |             | C/T | 01p | C | 0           | 0           |
| rs259358   | RWDD3       | C/T | 01p | T | 0.004464286 | 0           |
| rs273258   | IFI44L      | A/G | 01p | A | 0           | 0           |

|           |              |     |     |   |             |             |
|-----------|--------------|-----|-----|---|-------------|-------------|
| rs2745233 | C1orf151     | C/T | 01p | T | 0           | 0.004464286 |
| rs2800889 | ADORA3       | A/T | 01p | T | 0           | 0.017857143 |
| rs2810566 | HIVEP3       | C/T | 01p | T | 0           | 0           |
| rs284246  |              | A/G | 01p | G | 0.008928571 | 0           |
| rs2940315 | LRRC38       | A/G | 01p | A | 0.031531531 | 0.03125     |
| rs2941679 | ANKRD38      | C/G | 01p | C | 0.022321429 | 0.044642857 |
| rs2982486 |              | A/T | 01p | T | 0.022321429 | 0.058035714 |
| rs3006870 | CLCC1, FNDC7 | A/G | 01p | G | 0.004464286 | 0.004545455 |
| rs3087473 | ORC1L        | C/G | 01p | C | 0           | 0.013513513 |
| rs3087476 | ORC1L        | C/T | 01p | T | 0.040178571 | 0.026785714 |
| rs3087482 | ORC1L        | A/C | 01p | C | 0           | 0           |
| rs3218170 |              | A/G | 01p | A | 0.022321429 | 0.022321429 |
| rs351371  | WNT2B        | A/G | 01p | A | 0           | 0.009174312 |
| rs3737564 | TNNI3K       | C/T | 01p | C | 0.013636364 | 0.017857143 |
| rs3737703 | ELA2B        | A/G | 01p | A | 0           | 0           |
| rs3738414 | VTCN1        | A/G | 01p | A | 0.009009009 | 0.004504504 |
| rs3738420 | WDR3         | C/G | 01p | G | 0.009174312 | 0.013392857 |
| rs3738766 | GNAT2        | A/C | 01p | A | 0.036036036 | 0.013392857 |
| rs3748800 | PTPRF        | A/G | 01p | A | 0           | 0           |
| rs3766317 | STIL         | C/T | 01p | T | 0           | 0           |
| rs3768235 | BCL10        | A/G | 01p | A | 0.027027027 | 0.04587156  |
| rs3768249 | CTBS         | G/T | 01p | T | 0           | 0           |
| rs3783612 | VCAM1        | A/G | 01p | G | 0.004504505 | 0           |
| rs3783613 | VCAM1        | C/G | 01p | C | 0           | 0           |
| rs3783615 | VCAM1        | A/T | 01p | T | 0.027027027 | 0.041284404 |
| rs3795832 | LRRC8B       | C/T | 01p | T | 0.004464286 | 0           |
| rs3917991 | CSF3R        | C/G | 01p | C | 0.013392857 | 0.004464286 |
| rs3918021 | CSF3R        | C/T | 01p | T | 0           | 0           |
| rs397205  | SYNC1        | C/T | 01p | T | 0           | 0           |
| rs4274008 | C1orf174     | C/G | 01p | G | 0.004504505 | 0.013513514 |
| rs4460582 | MAST2        | A/G | 01p | G | 0           | 0.009345794 |
| rs4839131 |              | C/T | 01p | C | 0.004464286 | 0.013392857 |
| rs4915691 | DNAJC6       | A/G | 01p | A | 0.026785714 | 0.049107143 |
| rs4986954 | HSD3B2       | A/G | 01p | A | 0           | 0           |
| rs5172    | LRP8         | A/G | 01p | A | 0           | 0           |
| rs5229    | NPPB         | A/G | 01p | A | 0           | 0.009009009 |
| rs550252  | TCEB3        | C/T | 01p | T | 0           | 0           |



|            |                     |     |     |   |             |             |
|------------|---------------------|-----|-----|---|-------------|-------------|
| rs565156   |                     | A/C | 01p | C | 0.026785714 | 0.013392857 |
| rs566576   |                     | A/G | 01p | A | 0.026785714 | 0.058558559 |
| rs5670     | PTGER3              | A/T | 01p | T | 0           | 0           |
| rs5694     | PTGER3              | C/T | 01p | T | 0           | 0           |
| rs571655   | NPHP4               | A/G | 01p | A | 0.018018018 | 0.040178571 |
| rs5745549  | MSH4                | A/G | 01p | A | 0.035714286 | 0.017857143 |
| rs5746025  |                     | A/G | 01p | A | 0.018018018 | 0.027027027 |
| rs5746026  | TNFRSF1B            | A/G | 01p | A | 0.045045045 | 0.035714286 |
| rs5901     | F3                  | C/T | 01p | T | 0           | 0           |
| rs6087     | MPL                 | C/T | 01p | T | 0           | 0           |
| rs617153   |                     | A/C | 01p | A | 0.044642857 | 0.008928571 |
| rs6205     | HSD3B1              | C/T | 01p | C | 0           | 0.013392857 |
| rs6299     | HTR1D               | C/T | 01p | T | 0.004464286 | 0           |
| rs6659553  | POMGNT1             | C/T | 01p | T | 0           | 0           |
| rs6666652  | ABCA4               | A/C | 01p | A | 0.03125     | 0.044642857 |
| rs6678923  | NBPF7               | A/C | 01p | A | 0           | 0           |
| rs6702447  | HNRPCL1             | A/C | 01p | A | 0           | 0.031531531 |
| rs696698   | C1orf173            | A/G | 01p | A | 0.022321429 | 0.055555556 |
| rs7533776  | ELA3A               | C/T | 01p | C | 0           | 0           |
| rs7536086  | AGL                 | A/G | 01p | A | 0.049549549 | 0.045045045 |
| rs7542609  | BMP8B, OXCT2, BMP8A | C/G | 01p | G | 0           | 0           |
| rs7543267  |                     | A/T | 01p | A | 0           | 0           |
| rs7551068  | PLOD1               | C/G | 01p | C | 0.004464286 | 0.008928571 |
| rs7552335  | L1TD1               | A/T | 01p | T | 0.009009009 | 0.004464286 |
| rs783833   | BMP8B, OXCT2        | A/G | 01p | A | 0           | 0           |
| rs8179477  | DMRTA2              | C/T | 01p | T | 0           | 0           |
| rs859210   | AKR7A2              | A/G | 01p | A | 0           | 0           |
| rs9657979  | TNFRSF9             | A/C | 01p | A | 0           | 0           |
| rs9820     | PABPC4              | A/T | 01p | T | 0           | 0           |
| rs1028180  | BLZF1               | C/T | 01q | C | 0.022321429 | 0.022321429 |
| rs10305741 | ARNT                | G/T | 01q | G | 0.008928571 | 0.018018018 |
| rs1042767  | FMO4                | C/T | 01q | C | 0.004464286 | 0           |
| rs10465613 | LYST                | C/T | 01q | T | 0.004464286 | 0           |
| rs10482810 | TGFB2               | C/G | 01q | C | 0           | 0.004464286 |
| rs10489854 |                     | C/T | 01q | T | 0.04368932  | 0.086734694 |
| rs10489855 |                     | C/G | 01q | C | 0.035714286 | 0.044642857 |
| rs10494751 | ZBTB41              | A/C | 01q | A | 0           | 0           |

|            |                   |     |     |   |             |             |
|------------|-------------------|-----|-----|---|-------------|-------------|
| rs1050154  | QSOX1             | C/T | 01q | T | 0           | 0           |
| rs1050208  |                   | C/T | 01q | C | 0           | 0.004464286 |
| rs1078890  | IQGAP3            | A/G | 01q | A | 0.004464286 | 0           |
| rs10796961 | TTC24             | A/G | 01q | G | 0.017857143 | 0.040178571 |
| rs10800870 | LOC641515         | C/T | 01q | T | 0.026785714 | 0.017857143 |
| rs10888510 | LCE4A, LOC730862  | G/T | 01q | T | 0.017857143 | 0.035714286 |
| rs10908722 | OR10J1            | G/T | 01q | G | 0           | 0           |
| rs10910120 | PCNXL2            | C/T | 01q | C | 0.004504504 | 0.008928571 |
| rs10910439 | TARBP1            | C/T | 01q | T | 0.046391753 | 0.043010753 |
| rs10911390 | RGL1, APOBEC4     | C/T | 01q | T | 0.03125     | 0.026785714 |
| rs10918989 |                   | A/G | 01q | A | 0.018181818 | 0.041666667 |
| rs10919224 | HSPA6             | A/G | 01q | A | 0.004504504 | 0           |
| rs1106336  |                   | A/G | 01q | A | 0.017857143 | 0.031531531 |
| rs1106337  |                   | A/C | 01q | A | 0.017857143 | 0.031531531 |
| rs11118075 | RRP15             | C/G | 01q | C | 0.022321429 | 0.044642857 |
| rs11120645 | USH2A             | C/T | 01q | T | 0.017857143 | 0.026785714 |
| rs11205133 | IVL               | C/T | 01q | C | 0           | 0           |
| rs11264496 | IQGAP3            | C/T | 01q | T | 0.004464286 | 0.004464286 |
| rs11264506 | GPATCH4           | A/T | 01q | T | 0.013513514 | 0.03125     |
| rs11264585 | ARHGEF11, C1orf92 | A/G | 01q | A | 0           | 0.004504504 |
| rs11265047 | SPTA1             | C/T | 01q | T | 0           | 0           |
| rs1130183  | KCNJ10            | C/T | 01q | T | 0.040178571 | 0.035714286 |
| rs1144566  | RGS16             | A/G | 01q | A | 0.031531531 | 0.022522522 |
| rs11568032 | AGT               | A/G | 01q | A | 0           | 0           |
| rs11571117 | REN               | A/G | 01q | A | 0           | 0           |
| rs12040319 |                   | G/T | 01q | G | 0           | 0           |
| rs12059722 |                   | C/T | 01q | C | 0           | 0           |
| rs12062114 | C1orf116          | C/T | 01q | C | 0.009090909 | 0.009174312 |
| rs12090314 | SPTA1             | C/T | 01q | T | 0.019047619 | 0.010416667 |
| rs12129883 | PTPRC             | A/C | 01q | C | 0           | 0           |
| rs12136658 | PTPRC             | A/T | 01q | A | 0.013513513 | 0.013392857 |
| rs12138972 | C1orf14           | C/T | 01q | T | 0.026785714 | 0.017857143 |
| rs1466731  | ADAR              | A/G | 01q | A | 0           | 0           |
| rs164181   | C1orf111          | C/T | 01q | C | 0.004464286 | 0.004504504 |
| rs1804715  | HAX1              | C/T | 01q | C | 0           | 0           |
| rs1804957  | CD5L              | G/T | 01q | T | 0.004504505 | 0.004587156 |
| rs1823620  |                   | C/T | 01q | T | 0           | 0           |

|           |                     |     |     |   |             |             |
|-----------|---------------------|-----|-----|---|-------------|-------------|
| rs2066530 | FMO3                | C/T | 01q | C | 0           | 0           |
| rs2075740 | SPRR3               | C/T | 01q | T | 0           | 0           |
| rs2152051 | RXFP4               | A/G | 01q | A | 0.004464286 | 0           |
| rs2227606 | SERPINC1            | A/G | 01q | G | 0           | 0           |
| rs2228672 | SELP                | G/T | 01q | G | 0           | 0           |
| rs2232842 | CYB5R1              | A/G | 01q | G | 0.044642857 | 0.040540541 |
| rs2234697 | EPHX1               | C/T | 01q | T | 0           | 0           |
| rs2235371 | IRF6                | C/T | 01q | T | 0           | 0.018018018 |
| rs2235542 | LAMB3               | C/T | 01q | C | 0.026785714 | 0.035714286 |
| rs2269714 | CD1A                | C/T | 01q | T | 0.049107143 | 0.045045045 |
| rs2271458 | TRAF5               | A/C | 01q | C | 0           | 0           |
| rs2272792 | TADA1L              | C/T | 01q | T | 0.013392857 | 0.017857143 |
| rs2273712 | OPN3                | C/T | 01q | T | 0.017857143 | 0           |
| rs2274618 | ITGA10              | C/T | 01q | T | 0           | 0           |
| rs2275303 | SIPA1L2             | C/T | 01q | T | 0           | 0.013513514 |
| rs2275601 | LBR                 | A/G | 01q | G | 0           | 0           |
| rs2275654 | TARBP1              | A/G | 01q | G | 0           | 0.004504505 |
| rs2275894 |                     | C/G | 01q | G | 0           | 0           |
| rs2276403 | MNDA                | C/T | 01q | T | 0           | 0           |
| rs2276405 | AIM2                | C/T | 01q | T | 0           | 0.004504505 |
| rs2282284 | FCRL3               | C/T | 01q | C | 0.049107143 | 0.027272727 |
| rs2282304 | FLG2, LOC648187     | C/T | 01q | T | 0           | 0           |
| rs2291979 |                     | C/T | 01q | T | 0.004464286 | 0.008928571 |
| rs2295950 | C1orf26             | A/C | 01q | C | 0           | 0           |
| rs2296306 | LAMC2               | G/T | 01q | T | 0.049107143 | 0.04954955  |
| rs2297411 | CABC1               | G/T | 01q | G | 0           | 0.004587156 |
| rs2297952 | LOC730226           | C/T | 01q | T | 0           | 0           |
| rs2298805 | FCER1A              | A/G | 01q | A | 0           | 0           |
| rs2298872 | PTPRC               | A/C | 01q | C | 0.008928571 | 0           |
| rs2307198 | PLA2G4A             | A/G | 01q | G | 0.022321429 | 0.040178571 |
| rs2331995 | KIAA1614            | A/G | 01q | A | 0.004464286 | 0.013392857 |
| rs2457472 | HIST2H2BF, HIST2H3D | C/G | 01q | C | 0           | 0           |
| rs2473829 | FLJ44005            | A/C | 01q | A | 0           | 0.004504504 |
| rs2482965 | SPTA1               | A/C | 01q | A | 0.004464286 | 0           |
| rs2485405 |                     | G/T | 01q | G | 0           | 0.004672897 |
| rs2515663 |                     | G/T | 01q | T | 0           | 0.004464286 |
| rs2590125 | PDE4DIP             | A/C | 01q | A | 0           | 0           |

|           |                    |     |     |   |             |             |
|-----------|--------------------|-----|-----|---|-------------|-------------|
| rs2590131 | SEC22B             | A/G | 01q | G | 0           | 0           |
| rs2642993 | ZNF695             | A/C | 01q | C | 0.026785714 | 0.03125     |
| rs2820289 | NAV1               | C/T | 01q | T | 0.035714286 | 0.080357143 |
| rs2842726 | C1orf116           | A/G | 01q | A | 0.013513513 | 0.013513513 |
| rs291102  | PIGR               | C/T | 01q | T | 0.018181818 | 0.013513514 |
| rs3010980 | PDE4DIP, LOC652264 | C/T | 01q | C | 0           | 0.004587156 |
| rs3014626 | PPP1R15B           | C/T | 01q | T | 0           | 0           |
| rs3128652 | LOC127602          | A/G | 01q | G | 0.026785714 | 0.031531532 |
| rs3128658 | LOC127602          | G/T | 01q | G | 0.026785714 | 0.031531531 |
| rs3138100 | CD1C               | A/C | 01q | C | 0           | 0.004464286 |
| rs3218622 | PTGS2              | A/G | 01q | A | 0           | 0           |
| rs3736930 | ATP6V1G3           | C/T | 01q | T | 0.040178571 | 0.035714286 |
| rs3737657 | ETNK2              | A/G | 01q | A | 0.035714286 | 0.031531531 |
| rs3738178 | MOSC1              | A/T | 01q | A | 0           | 0.008928571 |
| rs3738586 | GON4L              | A/G | 01q | A | 0           | 0.004504504 |
| rs3747959 | KIAA1614           | A/G | 01q | A | 0           | 0           |
| rs3748695 | CENPF              | A/G | 01q | A | 0.049549549 | 0.054545454 |
| rs3753952 | CAMSAP1L1          | C/T | 01q | T | 0.014285714 | 0.028571429 |
| rs3766871 | RYR2               | A/G | 01q | A | 0.017857143 | 0.0625      |
| rs3795331 | SLAMF8             | A/G | 01q | A | 0.009009009 | 0           |
| rs3795339 | KCNJ10             | A/G | 01q | A | 0           | 0.004464286 |
| rs3795382 | SPRR1B             | C/T | 01q | T | 0.004716981 | 0.021052632 |
| rs3795517 | CENPF              | A/G | 01q | G | 0.049107143 | 0.049107143 |
| rs3795518 | CENPF              | C/T | 01q | T | 0.049107143 | 0.04954955  |
| rs3795524 | CENPF              | C/T | 01q | C | 0.049107143 | 0.049107143 |
| rs3795535 | MOSC2              | C/T | 01q | T | 0           | 0.004504505 |
| rs3795564 | NFASC              | A/G | 01q | A | 0.013392857 | 0           |
| rs3795800 | OBSCN              | C/T | 01q | T | 0.017857143 | 0.017857143 |
| rs3813953 | FCAMR              | A/C | 01q | C | 0.004464286 | 0           |
| rs381418  | GBA                | G/T | 01q | G | 0           | 0           |
| rs381427  | GBA                | G/T | 01q | G | 0           | 0           |
| rs3814299 | FLG                | A/G | 01q | A | 0           | 0.004464286 |
| rs3845314 | PDE4DIP            | C/G | 01q | C | 0           | 0           |
| rs3917422 | SELE               | A/C | 01q | C | 0           | 0           |
| rs3917724 | SELP               | C/T | 01q | T | 0           | 0           |
| rs3917769 | SELP               | A/G | 01q | A | 0           | 0           |
| rs3992692 |                    | A/G | 01q | A | 0.004464286 | 0           |

|           |                      |     |     |   |             |             |
|-----------|----------------------|-----|-----|---|-------------|-------------|
| rs4149864 | EXO1                 | A/G | 01q | A | 0           | 0           |
| rs4149909 | EXO1                 | A/G | 01q | G | 0.040178571 | 0.022727273 |
| rs4149910 | EXO1                 | A/G | 01q | G | 0           | 0           |
| rs4301615 | XCL2                 | C/G | 01q | C | 0           | 0           |
| rs4414062 | LOC375010            | A/C | 01q | C | 0           | 0           |
| rs4472790 | LOC149134            | G/T | 01q | G | 0.049107143 | 0.063063063 |
| rs4649613 | LOC650468, LOC729130 | A/T | 01q | A | 0           | 0           |
| rs4653415 | LOC127602            | C/T | 01q | C | 0           | 0           |
| rs4656527 |                      | A/G | 01q | A | 0           | 0           |
| rs4844609 | CR1                  | A/T | 01q | A | 0.038095238 | 0.038461538 |
| rs4950394 | CHD1L                | G/T | 01q | G | 0.045045045 | 0.0625      |
| rs4971053 | ASH1L                | C/T | 01q | T | 0           | 0           |
| rs4986931 | EPHX1                | A/G | 01q | A | 0           | 0           |
| rs4987382 | SELL                 | A/G | 01q | G | 0.004545455 | 0.004504505 |
| rs515299  | CFH                  | A/C | 01q | A | 0           | 0           |
| rs5273    | PTGS2                | C/T | 01q | C | 0           | 0           |
| rs534399  | CFH                  | A/C | 01q | A | 0.009009009 | 0           |
| rs5355    | SELE                 | C/T | 01q | T | 0.040178571 | 0.022321429 |
| rs5364    | SELE                 | A/G | 01q | A | 0           | 0           |
| rs570189  | HSPA6                | C/T | 01q | C | 0           | 0           |
| rs5999    | F13B                 | A/G | 01q | G | 0           | 0.009009009 |
| rs6000    | F13B                 | G/T | 01q | G | 0.023364486 | 0.037037037 |
| rs6005    | F5                   | C/G | 01q | G | 0.004464286 | 0           |
| rs6020    | F5                   | A/G | 01q | A | 0.013392857 | 0.004464286 |
| rs6026    | F5                   | A/G | 01q | A | 0.004504504 | 0           |
| rs6031    | F5                   | C/T | 01q | T | 0.004464286 | 0           |
| rs6134    | SELP                 | A/G | 01q | G | 0           | 0           |
| rs6336    | NTRK1                | C/T | 01q | T | 0.036036036 | 0.0625      |
| rs6425573 | C1orf125             | C/G | 01q | C | 0.015957447 | 0.005154639 |
| rs6540718 | DTL                  | A/C | 01q | A | 0.018018018 | 0.009174312 |
| rs6587624 | THEM5                | C/G | 01q | G | 0           | 0           |
| rs6587667 | FLG2, LOC648187      | C/T | 01q | T | 0.03125     | 0           |
| rs6593795 | ACP6                 | C/T | 01q | C | 0           | 0           |
| rs6661174 | FMO2                 | C/T | 01q | C | 0           | 0           |
| rs6664968 |                      | A/C | 01q | A | 0           | 0           |
| rs6674773 | TXNIP                | A/G | 01q | A | 0.009009009 | 0           |
| rs6695283 | OR5AT1               | A/G | 01q | A | 0           | 0           |

|            |              |     |     |   |             |             |
|------------|--------------|-----|-----|---|-------------|-------------|
| rs6695302  | OR2B11       | C/T | 01q | C | 0           | 0           |
| rs6697472  | OR2C3        | C/T | 01q | T | 0           | 0.004464286 |
| rs703145   |              | C/T | 01q | T | 0.004464286 | 0           |
| rs7339904  | RABGAP1L     | A/G | 01q | G | 0           | 0.004464286 |
| rs7411539  |              | C/G | 01q | G | 0           | 0           |
| rs751747   | JMJD4        | C/T | 01q | T | 0           | 0           |
| rs7521513  | QSOX1        | C/T | 01q | T | 0.004464286 | 0           |
| rs7524261  | LYST         | A/C | 01q | C | 0.004504505 | 0           |
| rs7535144  | LENEP, FLAD1 | G/T | 01q | T | 0.017857143 | 0.031531532 |
| rs7539     | YY1AP1       | C/G | 01q | C | 0.049549549 | 0.031531531 |
| rs7539719  | HMCN1        | A/G | 01q | G | 0.018018018 | 0.013392857 |
| rs7541041  | LYST         | A/G | 01q | A | 0           | 0           |
| rs771205   | FAM63A       | C/T | 01q | T | 0.031531532 | 0.031531532 |
| rs8144     | ITLN1        | C/G | 01q | G | 0.008928571 | 0           |
| rs822431   | C1orf92      | G/T | 01q | G | 0.009433962 | 0.018867924 |
| rs822522   | SYT11        | C/G | 01q | C | 0           | 0           |
| rs8917     | MPZL1        | A/G | 01q | A | 0.026785714 | 0.026785714 |
| rs9332485  | F5           | A/G | 01q | A | 0           | 0           |
| rs9436065  | FLG          | A/G | 01q | A | 0           | 0           |
| rs944627   | FCRL3        | A/G | 01q | A | 0           | 0           |
| rs964201   | ASPM         | A/G | 01q | A | 0           | 0.004545454 |
| rs1042023  | APOB         | C/G | 02p | G | 0.017857143 | 0.017857143 |
| rs10427235 |              | C/T | 02p | T | 0.004464286 | 0           |
| rs10490252 | hCG_15200    | A/G | 02p | G | 0           | 0.004464286 |
| rs1051949  | MRPL35       | A/G | 02p | A | 0           | 0           |
| rs1052065  | MRPL35       | A/G | 02p | G | 0           | 0           |
| rs1055048  | LOC730134    | C/T | 02p | T | 0           | 0           |
| rs1062863  | NAT8         | A/C | 02p | A | 0           | 0           |
| rs11466259 | TGFA         | A/G | 02p | A | 0.008928571 | 0.009090909 |
| rs11569738 |              | A/G | 02p | G | 0.013636364 | 0.022522523 |
| rs11569739 |              | A/G | 02p | G | 0.017857143 | 0.0625      |
| rs11569743 |              | A/G | 02p | A | 0.018018018 | 0.0625      |
| rs11677099 | RTN4         | A/T | 02p | A | 0.035714286 | 0.03125     |
| rs11889831 | CGREF1       | A/T | 02p | A | 0           | 0           |
| rs1192269  |              | C/T | 02p | T | 0.045045045 | 0.064814815 |
| rs1670283  | ALK          | C/T | 02p | T | 0           | 0           |
| rs1801702  | APOB         | C/G | 02p | C | 0.026785714 | 0.018018018 |

|           |                 |     |     |   |             |             |
|-----------|-----------------|-----|-----|---|-------------|-------------|
| rs1801703 | APOB            | A/G | 02p | A | 0.004464286 | 0.008928571 |
| rs1825474 |                 | A/G | 02p | G | 0.044642857 | 0.053571429 |
| rs1863772 | LOC129293       | A/G | 02p | A | 0.03125     | 0.049107143 |
| rs2020908 | MSH6            | C/G | 02p | G | 0.013392857 | 0.018348624 |
| rs2020912 | MSH6            | C/T | 02p | C | 0           | 0.013513513 |
| rs2072526 | VIT             | C/T | 02p | C | 0.026785714 | 0.026785714 |
| rs2229685 | RETSAT          | A/G | 02p | G | 0           | 0.004464286 |
| rs2251243 | ITSN2           | A/G | 02p | A | 0.017857143 | 0.008928571 |
| rs2255991 | QPCT            | A/G | 02p | A | 0           | 0.004464286 |
| rs2272428 | CCT4            | C/T | 02p | C | 0           | 0           |
| rs2272466 | CIB4, LOC339778 | A/T | 02p | T | 0           | 0           |
| rs2287345 | C2orf30         | C/G | 02p | C | 0.044642857 | 0.058558559 |
| rs2289168 | CCDC88A         | C/T | 02p | C | 0           | 0           |
| rs2290427 | LTBP1           | A/C | 02p | A | 0.009174312 | 0.004672897 |
| rs2302878 | PSME4           | C/T | 02p | C | 0.008928571 | 0.017857143 |
| rs2304564 | USP39           | C/T | 02p | T | 0.008928571 | 0.017857143 |
| rs2367810 |                 | C/G | 02p | G | 0           | 0.004464286 |
| rs2430013 | OTOP1           | C/T | 02p | C | 0           | 0           |
| rs2438101 | FLJ16124        | A/G | 02p | A | 0.013392857 | 0.013392857 |
| rs2903704 | SMEK2           | C/T | 02p | T | 0.035714286 | 0.013392857 |
| rs3206695 |                 | A/G | 02p | A | 0           | 0.004464286 |
| rs3213746 | CEBPZ, C2orf56  | C/T | 02p | T | 0.008928571 | 0.017857143 |
| rs3213941 | C2orf42         | G/T | 02p | G | 0           | 0.004464286 |
| rs340719  |                 | C/G | 02p | C | 0.026785714 | 0.026785714 |
| rs3749130 | ARHGAP25        | A/G | 02p | A | 0           | 0           |
| rs3770739 | AFTPH           | C/T | 02p | C | 0           | 0           |
| rs3770740 | AFTPH           | C/T | 02p | T | 0           | 0           |
| rs4244681 | OTOP1           | A/C | 02p | C | 0           | 0.004504505 |
| rs4670800 | FAM82A          | A/G | 02p | G | 0           | 0.004504505 |
| rs4982    | ADD2            | G/T | 02p | T | 0.015789474 | 0.016853933 |
| rs4986887 | CYP1B1          | C/G | 02p | C | 0           | 0           |
| rs533617  | APOB            | C/T | 02p | C | 0.044642857 | 0.03125     |
| rs5557    | SLC8A1          | A/T | 02p | T | 0           | 0.004464286 |
| rs6546090 |                 | G/T | 02p | T | 0.013392857 | 0.017857143 |
| rs6715286 | PREB, ABHD1     | G/T | 02p | T | 0           | 0           |
| rs6716066 | FLJ31438        | C/T | 02p | C | 0.027027027 | 0.044642857 |
| rs6726379 | OTOP1           | A/G | 02p | G | 0           | 0           |

|            |              |     |     |   |             |             |
|------------|--------------|-----|-----|---|-------------|-------------|
| rs6737156  | DGUOK        | C/T | 02p | C | 0.040178571 | 0.044642857 |
| rs6752026  | APOB         | A/G | 02p | A | 0.004504504 | 0           |
| rs704793   | IFT172       | C/T | 02p | T | 0           | 0           |
| rs7437     | CAD, C2orf28 | G/T | 02p | T | 0.044642857 | 0.04954955  |
| rs7582826  | ARL6IP2      | C/G | 02p | G | 0           | 0           |
| rs7586984  | REG1B        | C/T | 02p | T | 0           | 0           |
| rs7589796  | FOSL2        | A/G | 02p | G | 0           | 0           |
| rs7590838  | PNO1         | C/G | 02p | C | 0           | 0           |
| rs8176068  |              | A/G | 02p | A | 0.049107143 | 0.035714286 |
| rs8176069  |              | C/T | 02p | T | 0.017857143 | 0.008928571 |
| rs840964   | FLJ16124     | A/G | 02p | A | 0           | 0           |
| rs939820   | C2orf39      | A/G | 02p | A | 0           | 0           |
| rs9749947  |              | A/G | 02p | A | 0           | 0           |
| rs9753235  |              | C/T | 02p | T | 0           | 0           |
| rs10180086 | MERTK        | C/T | 02q | T | 0.03125     | 0.026785714 |
| rs10185178 | MYO3B        | A/G | 02q | G | 0           | 0           |
| rs10192157 | IL1RL1       | C/T | 02q | T | 0.016483517 | 0.00990099  |
| rs10198893 | DNAH7        | C/T | 02q | C | 0           | 0           |
| rs10208334 | SMPD4        | A/T | 02q | T | 0           | 0           |
| rs10385    | ILKAP        | C/T | 02q | T | 0           | 0           |
| rs1042038  | PSCDBP       | A/G | 02q | A | 0           | 0           |
| rs1046356  | KIAA1604     | A/G | 02q | A | 0.044642857 | 0.053571429 |
| rs10497377 | MAP1D        | G/T | 02q | T | 0           | 0.013392857 |
| rs1057044  | NFE2L2       | A/G | 02q | A | 0           | 0.004464286 |
| rs1063573  | NEB          | C/G | 02q | G | 0           | 0           |
| rs10930046 | IFIH1        | C/T | 02q | C | 0           | 0.005263158 |
| rs10931199 |              | A/G | 02q | G | 0           | 0.004464286 |
| rs10932814 | OBSL1        | C/T | 02q | T | 0           | 0           |
| rs11568350 | SLC40A1      | G/T | 02q | T | 0           | 0           |
| rs11568357 | ABCB11       | A/G | 02q | G | 0           | 0.004464286 |
| rs11568364 | ABCB11       | A/G | 02q | G | 0.017857143 | 0           |
| rs11575194 | IGFBP5       | C/T | 02q | T | 0.049107143 | 0.03125     |
| rs11692601 | B3GNT7       | C/T | 02q | T | 0.013392857 | 0.026785714 |
| rs11891776 | HDLBP        | A/C | 02q | A | 0           | 0.004464286 |
| rs11894115 | MPP4         | C/T | 02q | T | 0.027027027 | 0.018181818 |
| rs11896521 | COL6A3       | G/T | 02q | G | 0           | 0           |
| rs1225090  | ANKAR        | G/T | 02q | G | 0.004587156 | 0           |



|            |          |     |     |   |             |             |
|------------|----------|-----|-----|---|-------------|-------------|
| rs12466551 | TANC1    | A/G | 02q | A | 0           | 0           |
| rs12475068 |          | C/G | 02q | G | 0.045045045 | 0.059633028 |
| rs1251176  |          | C/G | 02q | G | 0.044642857 | 0.036036036 |
| rs12619995 | SATB2    | A/G | 02q | G | 0.004545455 | 0           |
| rs12622896 | THSD7B   | C/T | 02q | T | 0.017857143 | 0.013392857 |
| rs1446495  | DPP10    | C/T | 02q | C | 0           | 0           |
| rs1468999  | FLJ44048 | C/T | 02q | T | 0           | 0.009174312 |
| rs1521808  | ABCB11   | A/G | 02q | A | 0           | 0           |
| rs1529979  | PIP5K3   | G/T | 02q | G | 0.017857143 | 0.022321429 |
| rs1552280  | TTN      | C/T | 02q | C | 0.017857143 | 0.004464286 |
| rs1805085  | MSTN     | A/G | 02q | A | 0           | 0.008928571 |
| rs1805086  | MSTN     | A/G | 02q | G | 0.027027027 | 0.022522523 |
| rs1863703  | STK36    | A/G | 02q | G | 0.040540541 | 0.058035714 |
| rs2043449  | CYP20A1  | A/G | 02q | G | 0.045045045 | 0.044642857 |
| rs2066455  | PMS1     | C/G | 02q | C | 0           | 0           |
| rs2066459  | PMS1     | A/G | 02q | A | 0.017857143 | 0.013392857 |
| rs2066520  | SMARCAL1 | A/T | 02q | T | 0           | 0.004464286 |
| rs2066524  | SMARCAL1 | A/G | 02q | A | 0           | 0           |
| rs2114664  | TTLL4    | A/G | 02q | A | 0           | 0           |
| rs2163649  | TTC21B   | A/G | 02q | A | 0.004504504 | 0.004464286 |
| rs2228168  | LRP2     | C/T | 02q | C | 0           | 0.008928571 |
| rs2230516  | MERTK    | C/T | 02q | T | 0           | 0.004504505 |
| rs2233384  | NEU2     | A/C | 02q | A | 0           | 0           |
| rs2240543  | PASK     | A/G | 02q | G | 0.004464286 | 0.004504505 |
| rs2271038  |          | A/G | 02q | A | 0           | 0.009009009 |
| rs2271041  | CNGA3    | A/G | 02q | A | 0           | 0           |
| rs2271683  | COL3A1   | A/G | 02q | G | 0           | 0           |
| rs2271761  | ZNF533   | C/T | 02q | C | 0.013392857 | 0.013392857 |
| rs2272058  | MGC33657 | A/G | 02q | G | 0.004587156 | 0           |
| rs2278196  | TTN      | C/T | 02q | T | 0.027027027 | 0.022522523 |
| rs2287617  | ABCB11   | A/G | 02q | A | 0           | 0.004464286 |
| rs2287632  | MDH1B    | A/G | 02q | G | 0           | 0.004807692 |
| rs2288326  | TTN      | G/T | 02q | T | 0           | 0           |
| rs2289080  | CHRNA    | A/G | 02q | A | 0.026785714 | 0.009009009 |
| rs2289170  | PIP5K3   | A/G | 02q | A | 0           | 0           |
| rs2289912  | TNRC15   | G/T | 02q | T | 0.017857143 | 0.009009009 |
| rs2292880  | MLPH     | C/T | 02q | T | 0           | 0           |

|           |               |     |     |   |             |             |
|-----------|---------------|-----|-----|---|-------------|-------------|
| rs2303554 | SSFA2         | A/T | 02q | A | 0.026785714 | 0.03125     |
| rs2305820 | ITGB6         | G/T | 02q | T | 0           | 0           |
| rs2305835 | AAMP          | C/T | 02q | C | 0           | 0           |
| rs2315148 | ANKRD36       | A/C | 02q | C | 0           | 0           |
| rs2363468 | PIP5K3        | C/T | 02q | T | 0.013636364 | 0.018867925 |
| rs2372767 | XRCC5         | C/G | 02q | G | 0           | 0           |
| rs2375643 | DNAH7         | C/T | 02q | T | 0           | 0           |
| rs2444258 | RIF1          | C/T | 02q | T | 0           | 0.004464286 |
| rs2595390 |               | C/T | 02q | C | 0           | 0           |
| rs263672  |               | C/T | 02q | C | 0           | 0           |
| rs2718698 | GCC2          | C/G | 02q | G | 0.017857143 | 0.008928571 |
| rs2737085 | ITGA6         | G/T | 02q | T | 0           | 0.004504505 |
| rs2969361 | LOC375295     | G/T | 02q | T | 0           | 0           |
| rs3024839 | STAT4         | A/G | 02q | G | 0           | 0           |
| rs3132055 |               | A/G | 02q | G | 0.040178571 | 0.071428571 |
| rs3731745 | TTN           | C/T | 02q | C | 0.040909091 | 0.035714286 |
| rs3731895 | RESP18        | A/G | 02q | A | 0.004464286 | 0.031531531 |
| rs3732287 | BAZ2B         | A/G | 02q | A | 0.004504504 | 0.017857143 |
| rs3732305 | RIF1          | C/G | 02q | G | 0           | 0           |
| rs3732309 | NEB           | C/T | 02q | T | 0           | 0           |
| rs3738885 | BARD1         | C/G | 02q | G | 0           | 0           |
| rs3738888 | BARD1         | C/T | 02q | T | 0           | 0.004464286 |
| rs3739039 | LRRFIP1       | C/T | 02q | C | 0           | 0.004716981 |
| rs3748993 | KIAA1486      | A/C | 02q | A | 0.036036036 | 0.066964286 |
| rs3749002 | XIRP2         | A/G | 02q | A | 0.004464286 | 0           |
| rs3749003 | XIRP2         | A/G | 02q | G | 0.004464286 | 0           |
| rs3749081 | TMEM131       | C/G | 02q | C | 0           | 0.004464286 |
| rs3750904 | SCN9A         | C/T | 02q | C | 0.004464286 | 0.008928571 |
| rs3751108 | MLPH          | C/T | 02q | T | 0           | 0           |
| rs3752780 | ARMC9         | A/G | 02q | A | 0           | 0           |
| rs3754644 |               | C/T | 02q | C | 0           | 0           |
| rs3762628 | RNPEPL1       | C/T | 02q | T | 0.04954955  | 0.03125     |
| rs3769110 | TRAF3IP1      | C/T | 02q | C | 0.04587156  | 0.036363636 |
| rs3769838 | SP110         | C/T | 02q | C | 0           | 0.013513513 |
| rs3770209 | EPHA4         | A/G | 02q | G | 0           | 0           |
| rs3770436 | GORASP2       | A/G | 02q | A | 0.004464286 | 0.03125     |
| rs3771333 | DKFZp762E1312 | A/C | 02q | C | 0           | 0           |

|           |                      |     |     |   |             |             |
|-----------|----------------------|-----|-----|---|-------------|-------------|
| rs3783581 | IL1A                 | A/G | 02q | A | 0           | 0           |
| rs3791351 |                      | C/T | 02q | T | 0.013513514 | 0.017857143 |
| rs3796093 | MTERFD2              | C/T | 02q | C | 0.049107143 | 0.066964286 |
| rs3813246 | TTN                  | A/G | 02q | G | 0.040540541 | 0.035714286 |
| rs3821033 | ZNF142               | C/T | 02q | T | 0.026785714 | 0.026785714 |
| rs3827760 | EDAR                 | C/T | 02q | C | 0.009009009 | 0.027027027 |
| rs3915806 | ZNF142               | A/C | 02q | C | 0.008928571 | 0.009009009 |
| rs4419245 | LOC643194, LOC728220 | A/G | 02q | A | 0           | 0.004464286 |
| rs4674361 | C2orf24              | A/G | 02q | A | 0           | 0.004464286 |
| rs4893852 | TTN                  | A/G | 02q | G | 0.013513514 | 0.02293578  |
| rs4954449 | LCT                  | C/T | 02q | T | 0           | 0           |
| rs4972450 | WIPF1                | A/G | 02q | G | 0.040178571 | 0.05        |
| rs5940    | TFPI                 | A/G | 02q | A | 0.018018018 | 0.017857143 |
| rs6430735 | THSD7B               | A/G | 02q | A | 0           | 0           |
| rs6430896 |                      | A/G | 02q | A | 0           | 0           |
| rs6433711 | PDE11A               | C/T | 02q | C | 0           | 0           |
| rs6435421 | LOC389073            | A/G | 02q | A | 0           | 0           |
| rs6436058 | USP37                | A/G | 02q | A | 0           | 0           |
| rs6707930 | IL1F9                | A/C | 02q | A | 0           | 0.004545454 |
| rs6708944 | SLC9A4               | C/G | 02q | C | 0.036082474 | 0.031914894 |
| rs6709303 | STK36                | A/C | 02q | C | 0           | 0           |
| rs6710480 | UPP2                 | G/T | 02q | T | 0.031531532 | 0.045045045 |
| rs6713376 |                      | C/T | 02q | T | 0.045045045 | 0.076576577 |
| rs6717948 |                      | A/G | 02q | A | 0           | 0.004464286 |
| rs6723177 | FLJ38668             | A/G | 02q | G | 0.017857143 | 0.013513514 |
| rs6725443 | MPP4                 | C/T | 02q | C | 0           | 0           |
| rs6731822 | CKAP2L               | C/T | 02q | T | 0.035714286 | 0.058035714 |
| rs6749066 | MAP2, LOC648149      | A/G | 02q | G | 0.004545455 | 0.013636364 |
| rs6751827 |                      | A/G | 02q | G | 0.004464286 | 0           |
| rs6758375 | hCG_2045614          | C/T | 02q | T | 0           | 0.004464286 |
| rs6759356 | GALNT5               | C/G | 02q | C | 0.031818182 | 0.049107143 |
| rs6760593 | SCN7A                | A/G | 02q | A | 0           | 0.004504504 |
| rs681747  | STK11IP              | G/T | 02q | G | 0.040178571 | 0.040178571 |
| rs7349215 | ZNF806               | A/G | 02q | A | 0           | 0           |
| rs744428  | TTN                  | C/T | 02q | T | 0           | 0           |
| rs7559772 | LOC130940            | C/T | 02q | T | 0.035714286 | 0.022321429 |
| rs7565828 | hCG_2045614          | A/C | 02q | A | 0.004464286 | 0.009009009 |

|            |                      |     |     |   |             |             |
|------------|----------------------|-----|-----|---|-------------|-------------|
| rs7568910  |                      | G/T | 02q | T | 0.004504505 | 0           |
| rs7575022  |                      | C/T | 02q | T | 0           | 0           |
| rs7576532  | FLJ44048             | A/C | 02q | A | 0           | 0.004464286 |
| rs7576719  |                      | C/T | 02q | T | 0.004504505 | 0.009174312 |
| rs7580167  |                      | A/G | 02q | A | 0           | 0.004504504 |
| rs7580926  |                      | A/C | 02q | A | 0.004504504 | 0.03125     |
| rs7592352  | INPP1                | A/G | 02q | G | 0.036036036 | 0.023364486 |
| rs7592429  | TTC21B               | C/T | 02q | T | 0           | 0.004761905 |
| rs7593622  | ZAK                  | C/T | 02q | T | 0           | 0           |
| rs7594971  |                      | C/T | 02q | T | 0           | 0           |
| rs7597367  | SCLY                 | A/G | 02q | G | 0           | 0           |
| rs7600443  |                      | C/G | 02q | C | 0.009090909 | 0.004464286 |
| rs7601509  | MFSD9                | A/C | 02q | A | 0           | 0.004504504 |
| rs7608121  | ZRANB3               | C/T | 02q | T | 0           | 0           |
| rs8179739  |                      | C/T | 02q | T | 0           | 0           |
| rs8179856  | LOC339742            | C/T | 02q | C | 0           | 0.013513513 |
| rs887987   | TMEM182              | A/G | 02q | A | 0.044642857 | 0.045045045 |
| rs922985   | TTN                  | C/G | 02q | C | 0           | 0           |
| rs938017   | LOC339760, LOC651281 | C/T | 02q | T | 0.049107143 | 0.040178571 |
| rs9967806  | CCDC108              | A/G | 02q | A | 0.022321429 | 0.031531531 |
| rs10449518 |                      | C/G | 03p | G | 0           | 0           |
| rs1045656  | PCBP4, GPR62         | A/G | 03p | A | 0           | 0           |
| rs1051612  | POU1F1               | C/T | 03p | C | 0           | 0.005681818 |
| rs1052138  | OGG1, CAMK1, TTLL3   | A/T | 03p | A | 0           | 0           |
| rs1052140  | OGG1, CAMK1, TTLL3   | C/T | 03p | T | 0           | 0           |
| rs1109643  | GORASP1              | C/T | 03p | T | 0           | 0.004464286 |
| rs11128437 |                      | A/C | 03p | C | 0.013513514 | 0.009174312 |
| rs11539086 | FAM107A              | C/G | 03p | C | 0.036363636 | 0.036697248 |
| rs11716130 |                      | C/G | 03p | C | 0           | 0           |
| rs12488691 |                      | C/T | 03p | T | 0.004545455 | 0.008928571 |
| rs1274971  | TTC21A               | C/T | 03p | T | 0.014851485 | 0           |
| rs1274972  | TTC21A               | C/T | 03p | T | 0.037735849 | 0.01        |
| rs1395388  | TGM4                 | C/G | 03p | G | 0.045045045 | 0.080357143 |
| rs1466685  | IHPK1, GMPPB         | A/G | 03p | A | 0           | 0           |
| rs1505403  | LOC389124            | C/T | 03p | T | 0           | 0.004464286 |
| rs1805373  | OGG1, TTLL3          | A/G | 03p | A | 0           | 0           |
| rs1887788  |                      | A/C | 03p | C | 0.047169811 | 0.033333333 |

|           |                  |     |     |   |             |             |
|-----------|------------------|-----|-----|---|-------------|-------------|
| rs2020872 | MLH1, EPM2AIP1   | A/G | 03p | G | 0           | 0           |
| rs2020873 | MLH1             | C/T | 03p | T | 0           | 0           |
| rs2131107 | DAG1             | C/G | 03p | G | 0.013392857 | 0.004545455 |
| rs2172397 | GBE1             | A/G | 03p | A | 0.036697248 | 0.031818182 |
| rs2227999 | XPC              | A/G | 03p | A | 0.045454545 | 0.058558559 |
| rs2231927 | FLJ10213, PPP4R2 | G/T | 03p | G | 0.004464286 | 0.004504504 |
| rs2232346 | IL17RB           | C/T | 03p | C | 0.04054054  | 0.026785714 |
| rs2232350 | IL17RB, ACTR8    | C/T | 03p | C | 0.004504504 | 0.004464286 |
| rs2234355 | CXCR6, FYCO1     | A/G | 03p | A | 0           | 0.009090909 |
| rs2239751 | CISH             | A/C | 03p | C | 0.026785714 | 0.013513514 |
| rs2270569 | KIF9             | A/G | 03p | A | 0           | 0           |
| rs2276812 | GLT8D1           | C/T | 03p | T | 0.004464286 | 0           |
| rs2279289 | LRIG1            | C/G | 03p | C | 0.004504504 | 0.009090909 |
| rs2290302 | TTLL3            | A/C | 03p | C | 0           | 0.009090909 |
| rs2302787 | CRELD1           | C/G | 03p | G | 0           | 0           |
| rs2305296 | MKRN2            | A/G | 03p | G | 0           | 0           |
| rs2367414 |                  | A/G | 03p | G | 0           | 0           |
| rs332373  | LRIG1            | C/T | 03p | T | 0.022321429 | 0.035714286 |
| rs332374  | LRIG1            | C/G | 03p | G | 0.022321429 | 0.041284404 |
| rs3731062 | XPC              | C/T | 03p | T | 0.013392857 | 0.013392857 |
| rs3732380 | CX3CR1           | C/T | 03p | T | 0           | 0           |
| rs3733082 | ACTR8            | A/G | 03p | A | 0.036363636 | 0.017857143 |
| rs3733101 | FYCO1            | C/T | 03p | T | 0           | 0           |
| rs3736422 | TMF1             | C/T | 03p | C | 0           | 0           |
| rs3749383 | ITPR1            | A/G | 03p | G | 0           | 0           |
| rs3772406 | SMARCC1          | G/T | 03p | T | 0           | 0           |
| rs3774395 | CCK              | A/G | 03p | A | 0           | 0           |
| rs3806633 | CACNA2D3, LRTM1  | A/G | 03p | A | 0           | 0           |
| rs419164  | DLEC1            | A/T | 03p | T | 0           | 0           |
| rs4302331 | GLB1             | A/G | 03p | A | 0           | 0           |
| rs4684677 | GHRL             | A/T | 03p | A | 0.04054054  | 0.058558559 |
| rs4858097 | NR1D2            | A/T | 03p | T | 0           | 0           |
| rs6442224 |                  | C/G | 03p | G | 0           | 0           |
| rs6787633 | ADAMTS9          | C/G | 03p | C | 0.008928571 | 0.008928571 |
| rs6798400 | ZNF502           | C/T | 03p | C | 0           | 0           |
| rs6805248 | XIRP1            | C/T | 03p | T | 0           | 0           |
| rs6810145 | LMOD3            | A/T | 03p | A | 0           | 0           |

|            |                 |     |     |   |             |             |
|------------|-----------------|-----|-----|---|-------------|-------------|
| rs7340737  |                 | A/C | 03p | C | 0           | 0           |
| rs7356031  | IL17RE          | A/G | 03p | G | 0           | 0.004545455 |
| rs7617704  | NR2C2           | C/G | 03p | G | 0           | 0           |
| rs7621398  | NGLY1           | C/T | 03p | T | 0           | 0           |
| rs7625286  | OSBPL10         | C/G | 03p | G | 0           | 0           |
| rs7633228  | GBE1            | C/T | 03p | C | 0.026785714 | 0.017857143 |
| rs7638754  | FHIT, LOC131691 | C/T | 03p | C | 0.018018018 | 0.054054054 |
| rs7647379  | OSBPL10         | A/G | 03p | G | 0           | 0           |
| rs8180058  | LOC401074       | G/T | 03p | G | 0           | 0           |
| rs9310141  | FRMD4B          | C/T | 03p | T | 0.004672897 | 0           |
| rs9310684  |                 | A/G | 03p | A | 0           | 0           |
| rs9311404  | SETD2           | C/G | 03p | G | 0.004464286 | 0.004504505 |
| rs9311440  | USP4            | C/T | 03p | C | 0           | 0           |
| rs9827576  | XIRP1           | C/T | 03p | C | 0           | 0           |
| rs9831516  | FRMD4B          | A/G | 03p | G | 0.017857143 | 0.004464286 |
| rs9840779  | GOLGA4          | A/G | 03p | G | 0           | 0           |
| rs9856575  | NISCH           | A/G | 03p | G | 0.022522523 | 0.009090909 |
| rs9865715  | CYP8B1          | A/G | 03p | A | 0           | 0           |
| rs9868848  | ZFYVE20         | A/G | 03p | G | 0.040909091 | 0.044642857 |
| rs9868950  | EFHB            | G/T | 03p | G | 0.004504504 | 0           |
| rs9872723  |                 | A/C | 03p | C | 0           | 0.00462963  |
| rs9874077  | CDCP1           | C/T | 03p | T | 0           | 0           |
| rs1042155  | IL12A           | C/T | 03q | C | 0           | 0           |
| rs1048032  | WDR53           | A/C | 03q | C | 0           | 0           |
| rs1054263  | GTPBP8          | G/T | 03q | T | 0.03125     | 0.053571429 |
| rs1062553  | EHHADH          | C/T | 03q | T | 0           | 0           |
| rs1063955  | NR1I2           | A/G | 03q | A | 0           | 0           |
| rs11706273 | ABCF3           | C/T | 03q | T | 0.04954955  | 0.026785714 |
| rs12489516 | CPA3            | C/T | 03q | C | 0.040178571 | 0.027027027 |
| rs12490341 | NMD3            | A/G | 03q | A | 0           | 0           |
| rs1290666  |                 | G/T | 03q | T | 0.004504505 | 0           |
| rs13043    | FAIM            | A/G | 03q | G | 0.022321429 | 0.013392857 |
| rs1378795  | VEPH1           | A/T | 03q | A | 0.004545454 | 0           |
| rs1381837  | LOC151760       | A/G | 03q | A | 0.013513513 | 0.008928571 |
| rs1381838  | LOC151760       | C/T | 03q | C | 0           | 0           |
| rs140693   | MBD4            | A/G | 03q | A | 0           | 0           |
| rs1546732  | COMMD2          | A/T | 03q | T | 0           | 0           |

|           |              |     |     |   |             |             |
|-----------|--------------|-----|-----|---|-------------|-------------|
| rs15648   | COPG         | A/G | 03q | G | 0           | 0           |
| rs15660   | KPNA1        | A/C | 03q | A | 0           | 0           |
| rs1799807 | BCHE         | A/G | 03q | G | 0           | 0           |
| rs1800572 | SLC2A2       | A/G | 03q | A | 0           | 0           |
| rs1801726 | CASR         | C/G | 03q | G | 0           | 0           |
| rs1920314 | SLC15A2      | G/T | 03q | G | 0           | 0.004504504 |
| rs2068178 | ARPM1        | A/G | 03q | A | 0.031531531 | 0.017857143 |
| rs2241559 | AMOTL2       | C/T | 03q | T | 0           | 0           |
| rs2271496 | SIDT1        | C/T | 03q | T | 0.027272727 | 0.022321429 |
| rs2276717 | SLC7A14      | A/G | 03q | A | 0           | 0           |
| rs2276761 | MED12L       | A/G | 03q | A | 0           | 0           |
| rs2276790 | MFI2         | C/T | 03q | T | 0           | 0.008928571 |
| rs2276802 | KCNMB3       | A/C | 03q | C | 0.009009009 | 0.009259259 |
| rs2276872 | CD96         | C/G | 03q | G | 0           | 0           |
| rs2287579 | PLD1         | C/T | 03q | T | 0           | 0           |
| rs2290477 | KIAA2018     | A/C | 03q | A | 0.005       | 0.02        |
| rs2291397 | PIGX         | A/G | 03q | A | 0           | 0           |
| rs2293203 | MCF2L2       | A/T | 03q | A | 0.013392857 | 0.013392857 |
| rs2302819 | EHHADH       | A/G | 03q | A | 0           | 0.013636364 |
| rs2305868 | HLTF         | A/G | 03q | G | 0.03125     | 0.031531532 |
| rs2306211 | POLQ         | A/G | 03q | A | 0.026785714 | 0.004545454 |
| rs2307289 | MBD4         | C/T | 03q | C | 0           | 0           |
| rs2307293 | MBD4         | C/G | 03q | C | 0.017857143 | 0.013392857 |
| rs2307298 | MBD4         | C/T | 03q | C | 0.027027027 | 0.02293578  |
| rs2307313 | MCM2, PODXL2 | A/G | 03q | A | 0           | 0           |
| rs2316680 |              | A/C | 03q | A | 0           | 0.010638298 |
| rs2316681 |              | A/G | 03q | G | 0           | 0.005494506 |
| rs2692622 | PLA1A        | C/T | 03q | T | 0           | 0           |
| rs2931761 | BTLA         | A/C | 03q | C | 0           | 0           |
| rs3192151 | TOPBP1       | A/C | 03q | C | 0           | 0           |
| rs3218637 | POLQ         | A/G | 03q | A | 0           | 0           |
| rs3218640 | POLQ         | A/G | 03q | A | 0           | 0           |
| rs3218642 | POLQ         | A/C | 03q | A | 0.018181818 | 0.017857143 |
| rs340151  | TMPRSS7      | A/T | 03q | A | 0.03125     | 0.058035714 |
| rs3732401 | GTF2E1       | C/T | 03q | T | 0.035714286 | 0.017857143 |
| rs3732452 | LRRC31       | G/T | 03q | T | 0           | 0           |
| rs3732485 | MYLK         | C/T | 03q | T | 0.004464286 | 0.008928571 |

|           |                  |     |     |   |             |             |
|-----------|------------------|-----|-----|---|-------------|-------------|
| rs3732576 | MAP3K13          | C/T | 03q | T | 0           | 0           |
| rs3732619 | LOC152118        | A/G | 03q | A | 0.013392857 | 0.04054054  |
| rs3732756 | GPR171, MED12L   | C/T | 03q | C | 0.018018018 | 0.017857143 |
| rs3732775 | IGSF10           | A/T | 03q | A | 0.009090909 | 0.013392857 |
| rs3733008 | HRG              | A/G | 03q | G | 0           | 0           |
| rs3749323 | ZBTB11           | A/G | 03q | A | 0           | 0           |
| rs3749330 | MUC4             | A/C | 03q | A | 0           | 0           |
| rs3749394 |                  | A/G | 03q | G | 0.013392857 | 0.017857143 |
| rs3774787 | C3orf25          | A/G | 03q | G | 0.004504505 | 0           |
| rs3796164 | MYLK             | A/G | 03q | G | 0.022321429 | 0.027027027 |
| rs3796241 | CLRN1            | A/T | 03q | T | 0           | 0           |
| rs3804769 | SLC33A1          | C/T | 03q | C | 0.045454545 | 0.067567568 |
| rs3821446 |                  | A/T | 03q | A | 0.008928571 | 0           |
| rs4510407 |                  | A/G | 03q | A | 0           | 0           |
| rs4678193 | KPNA1            | C/T | 03q | C | 0.018181818 | 0.013513513 |
| rs4682484 |                  | C/T | 03q | T | 0.013392857 | 0.022522523 |
| rs4855576 | MORC1            | A/T | 03q | A | 0.018181818 | 0.013392857 |
| rs5030015 | KNG1             | A/G | 03q | A | 0           | 0           |
| rs5030024 | KNG1             | C/T | 03q | C | 0           | 0           |
| rs6438544 | C3orf15          | C/G | 03q | G | 0           | 0           |
| rs6583275 |                  | C/T | 03q | T | 0           | 0           |
| rs6772440 |                  | C/G | 03q | C | 0           | 0           |
| rs6773138 | SLC12A8          | C/T | 03q | C | 0.022727273 | 0.044642857 |
| rs6782974 | LOC257039        | A/G | 03q | A | 0.017857143 | 0.026785714 |
| rs6785067 | FETUB            | A/G | 03q | A | 0.004464286 | 0.008928571 |
| rs6791226 |                  | A/T | 03q | T | 0.022321429 | 0.035714286 |
| rs6802937 | NAALADL2         | C/T | 03q | C | 0           | 0.004464286 |
| rs6804951 | MCF2L2           | C/T | 03q | T | 0.049107143 | 0.066964286 |
| rs6809863 |                  | C/T | 03q | T | 0           | 0.004587156 |
| rs702017  | POLQ             | G/T | 03q | G | 0.004464286 | 0           |
| rs7433088 |                  | A/G | 03q | A | 0           | 0           |
| rs7433911 |                  | A/G | 03q | A | 0           | 0           |
| rs751793  | CDGAP            | C/T | 03q | T | 0.008928571 | 0.008928571 |
| rs7633387 | ECE2, CAMK2N2    | C/T | 03q | C | 0.031914894 | 0.052941176 |
| rs7637863 | SLC2A2           | A/G | 03q | A | 0.004504504 | 0           |
| rs768527  | FILIP1L, C3orf26 | C/T | 03q | T | 0           | 0           |
| rs769533  |                  | A/G | 03q | G | 0           | 0           |



|            |           |     |     |   |             |             |
|------------|-----------|-----|-----|---|-------------|-------------|
| rs784689   | TMCC1     | C/T | 03q | T | 0           | 0           |
| rs8177238  | TF        | A/G | 03q | G | 0           | 0.009009009 |
| rs863642   | SLC12A8   | A/G | 03q | G | 0           | 0           |
| rs9288952  | BTLA      | A/G | 03q | G | 0.049107143 | 0.053571429 |
| rs9836111  | C3orf25   | C/T | 03q | C | 0           | 0           |
| rs9869292  | C3orf43   | A/G | 03q | A | 0           | 0.004504504 |
| rs9869984  | HCLS1     | C/G | 03q | C | 0           | 0           |
| rs9917722  | SI        | C/G | 03q | C | 0.004464286 | 0           |
| rs10001580 | PGM2      | A/C | 04p | C | 0.017857143 | 0.017857143 |
| rs10009150 | S100P     | A/G | 04p | G | 0.014285714 | 0           |
| rs1064372  | RBPJ      | A/G | 04p | G | 0           | 0           |
| rs1064384  | RBPJ      | A/G | 04p | A | 0           | 0           |
| rs11466649 | TLR10     | G/T | 04p | T | 0.044642857 | 0.05        |
| rs11466653 | TLR10     | C/T | 04p | C | 0.044642857 | 0.049107143 |
| rs11466655 | TLR10     | A/G | 04p | A | 0.004504504 | 0.009433962 |
| rs11466657 | TLR10     | C/T | 04p | C | 0.040909091 | 0.026785714 |
| rs11466658 | TLR10     | C/T | 04p | T | 0.026785714 | 0.036036036 |
| rs1488269  | FLJ45721  | C/T | 04p | T | 0           | 0           |
| rs2066791  | RFC1      | A/G | 04p | G | 0           | 0           |
| rs2227843  | DRD5      | A/G | 04p | A | 0           | 0           |
| rs2227852  | DRD5      | A/G | 04p | A | 0           | 0           |
| rs2229296  | ZNF141    | A/G | 04p | G | 0           | 0           |
| rs2230720  | WFS1      | C/T | 04p | T | 0           | 0           |
| rs2269497  | RGS12     | A/G | 04p | G | 0.022321429 | 0.03125     |
| rs2276887  | TMEM156   | A/G | 04p | G | 0.004464286 | 0           |
| rs2279252  | EVC       | C/T | 04p | T | 0.009345794 | 0.033980583 |
| rs2286866  | KIAA0746  | C/G | 04p | C | 0           | 0           |
| rs2295497  | ADD1      | A/G | 04p | A | 0           | 0           |
| rs2302464  | BST1      | C/T | 04p | T | 0.026785714 | 0.03125     |
| rs2581423  | SLC30A9   | C/T | 04p | T | 0.031531532 | 0.018518519 |
| rs3025837  | HD        | G/T | 04p | G | 0           | 0.004464286 |
| rs3135152  | LOC402160 | C/T | 04p | T | 0           | 0           |
| rs363129   | HD        | A/G | 04p | A | 0           | 0.008928571 |
| rs3733500  | C4orf19   | A/G | 04p | G | 0           | 0           |
| rs3736265  | PPARGC1A  | A/G | 04p | A | 0.040909091 | 0.022727273 |
| rs3792687  | ATP8A1    | C/T | 04p | T | 0           | 0           |
| rs3822227  | FAM44A    | C/T | 04p | T | 0           | 0.004464286 |

|            |           |     |     |   |             |             |
|------------|-----------|-----|-----|---|-------------|-------------|
| rs3923647  | TLR1      | A/T | 04p | T | 0.03125     | 0.040178571 |
| rs4241069  | LOC375010 | C/T | 04p | T | 0           | 0.004504505 |
| rs4461553  | CCDC4     | G/T | 04p | T | 0.040540541 | 0.036036036 |
| rs4833069  | CENTD1    | C/T | 04p | C | 0.004672897 | 0.013513513 |
| rs4974836  |           | G/T | 04p | T | 0.023584906 | 0.01980198  |
| rs4993355  |           | C/T | 04p | C | 0.04054054  | 0.09375     |
| rs5743612  | TLR1      | C/T | 04p | T | 0           | 0.009433962 |
| rs5743808  | TLR6      | C/T | 04p | C | 0.004464286 | 0.008928571 |
| rs5743809  | TLR6      | C/T | 04p | C | 0           | 0           |
| rs6449160  |           | A/C | 04p | C | 0           | 0           |
| rs6823649  |           | A/G | 04p | A | 0.004464286 | 0           |
| rs6825562  | KIAA1276  | A/G | 04p | A | 0           | 0           |
| rs6840615  | BST1      | A/G | 04p | G | 0           | 0.014423077 |
| rs7656657  |           | G/T | 04p | T | 0           | 0           |
| rs886532   | C4orf6    | G/T | 04p | T | 0.004464286 | 0.004464286 |
| rs955713   |           | A/G | 04p | A | 0           | 0           |
| rs9684214  | ZNF718    | A/G | 04p | G | 0           | 0           |
| rs9684215  | ZNF718    | A/C | 04p | C | 0           | 0           |
| rs1031639  | THAP9     | C/T | 04q | C | 0           | 0           |
| rs1034494  | FREM3     | C/G | 04q | G | 0           | 0.013392857 |
| rs1041969  | ADH1B     | A/C | 04q | A | 0           | 0           |
| rs10517695 | FLJ25371  | A/G | 04q | A | 0.013636364 | 0.004464286 |
| rs1053668  | CAMK2D    | C/G | 04q | G | 0           | 0           |
| rs11098261 | UGT8      | A/G | 04q | A | 0           | 0.004464286 |
| rs11098943 | MFSD8     | C/G | 04q | G | 0           | 0.009174312 |
| rs1135003  | RAPGEF2   | G/T | 04q | T | 0           | 0           |
| rs1139776  | KDR       | A/T | 04q | A | 0           | 0           |
| rs11568849 | EGF       | A/C | 04q | C | 0           | 0           |
| rs11568943 | EGF       | A/G | 04q | A | 0.040178571 | 0.0625      |
| rs11569017 | EGF       | A/T | 04q | T | 0           | 0           |
| rs11569046 | EGF       | C/T | 04q | C | 0.004464286 | 0.009009009 |
| rs11569736 |           | G/T | 04q | G | 0           | 0.004464286 |
| rs11574696 | CASP6     | A/C | 04q | A | 0           | 0           |
| rs11574697 | CASP6     | A/G | 04q | A | 0           | 0           |
| rs11939152 |           | A/C | 04q | A | 0.004464286 | 0           |
| rs12500437 | DCHS2     | G/T | 04q | G | 0.04054054  | 0.013761468 |
| rs12650153 | FAT4      | A/G | 04q | G | 0           | 0           |

|           |           |     |     |   |             |             |
|-----------|-----------|-----|-----|---|-------------|-------------|
| rs1280097 | FAT       | C/G | 04q | C | 0.004504504 | 0.004464286 |
| rs1442138 | MMRN1     | C/T | 04q | C | 0.045454545 | 0.040178571 |
| rs1550931 | C4orf36   | G/T | 04q | G | 0.004672897 | 0.022727273 |
| rs1613461 | C4orf40   | C/T | 04q | T | 0.013392857 | 0.026785714 |
| rs1782360 | LRBA      | C/G | 04q | G | 0.049107143 | 0.04954955  |
| rs1801612 | PKD2      | A/G | 04q | G | 0.004464286 | 0           |
| rs1849119 | GYPB      | C/T | 04q | C | 0           | 0           |
| rs1876268 | NEIL3     | A/G | 04q | G | 0.035714286 | 0.027027027 |
| rs2066870 | FGG       | C/T | 04q | C | 0           | 0.004672897 |
| rs2074380 | ALPK1     | A/G | 04q | A | 0.004464286 | 0           |
| rs2074381 | ALPK1     | A/G | 04q | G | 0.004464286 | 0.004464286 |
| rs2074383 |           | C/G | 04q | G | 0           | 0           |
| rs2170646 | GUCY1A3   | C/T | 04q | T | 0           | 0           |
| rs2271513 |           | A/G | 04q | A | 0           | 0           |
| rs2278542 | KLKB1     | A/C | 04q | A | 0           | 0.004464286 |
| rs2288676 | ANP32C    | A/G | 04q | G | 0.04954955  | 0.058035714 |
| rs2304867 | FAT       | A/G | 04q | A | 0.018018018 | 0.022727273 |
| rs2306986 | MTTP      | C/G | 04q | C | 0.044554455 | 0.072815534 |
| rs2319796 | TMPRSS11B | A/C | 04q | A | 0           | 0           |
| rs2463447 | CCDC111   | A/G | 04q | A | 0           | 0.004464286 |
| rs2609428 | ENAM      | C/T | 04q | C | 0.004464286 | 0.004464286 |
| rs283413  | ADH1C     | G/T | 04q | T | 0.027027027 | 0.022321429 |
| rs2898750 | TUBB4Q    | C/T | 04q | T | 0           | 0           |
| rs29372   | ANK2      | C/T | 04q | C | 0           | 0.004672897 |
| rs3113676 | BANK1     | C/T | 04q | T | 0.008928571 | 0.017857143 |
| rs3133166 |           | C/G | 04q | G | 0.009009009 | 0           |
| rs3204504 | ALB       | C/T | 04q | T | 0           | 0           |
| rs369533  |           | C/T | 04q | T | 0.032608696 | 0.044554455 |
| rs3733319 | MFSD8     | A/G | 04q | A | 0.017857143 | 0.018018018 |
| rs3733378 | AFF1      | C/G | 04q | C | 0           | 0.004504504 |
| rs3733617 | ANK2      | C/T | 04q | T | 0.035714286 | 0.0625      |
| rs3750025 | DSPP      | C/T | 04q | T | 0.008928571 | 0.022321429 |
| rs3762891 | LOC91431  | C/G | 04q | G | 0           | 0           |
| rs3775091 | MGC16169  | C/G | 04q | C | 0           | 0           |
| rs3792683 | MTTP      | A/G | 04q | G | 0.035714286 | 0.04954955  |
| rs3796543 | AASDH     | A/G | 04q | G | 0.022321429 | 0.022321429 |
| rs3796703 | ENAM      | C/T | 04q | T | 0.004504505 | 0.017857143 |

|           |                      |     |     |   |             |             |
|-----------|----------------------|-----|-----|---|-------------|-------------|
| rs3796704 | ENAM                 | A/G | 04q | A | 0.022727273 | 0.054545454 |
| rs3797036 | SEC31A               | A/C | 04q | C | 0           | 0           |
| rs3811835 |                      | A/G | 04q | A | 0.013513513 | 0.013513513 |
| rs398179  |                      | C/T | 04q | C | 0           | 0           |
| rs4132835 | LOC728193            | C/T | 04q | T | 0           | 0           |
| rs4150050 | CCNG2                | G/T | 04q | G | 0.008928571 | 0.026785714 |
| rs4253373 | KLKB1                | A/C | 04q | A | 0           | 0           |
| rs4253377 | KLKB1                | G/T | 04q | G | 0           | 0           |
| rs4317244 | C4orf20, ANKRD37     | C/G | 04q | G | 0.031818182 | 0.03125     |
| rs4413373 | HERC6                | C/T | 04q | T | 0           | 0           |
| rs4648099 | NFKB1                | G/T | 04q | G | 0           | 0           |
| rs4660    | SPP1                 | A/G | 04q | A | 0           | 0           |
| rs5030593 | CASP6                | A/T | 04q | T | 0.01        | 0.005050505 |
| rs550625  | FLJ20035             | A/G | 04q | A | 0.035714286 | 0.067567568 |
| rs5523    | NR3C2                | A/C | 04q | C | 0           | 0           |
| rs5527    | NR3C2                | A/G | 04q | G | 0           | 0           |
| rs5578    | NPY1R                | A/C | 04q | C | 0.004464286 | 0.008928571 |
| rs5743318 | TLR3                 | A/T | 04q | A | 0           | 0           |
| rs5743704 | TLR2                 | A/C | 04q | A | 0.03125     | 0.035714286 |
| rs5949    | ANXA3                | C/T | 04q | T | 0           | 0           |
| rs5951    | ANXA3                | A/G | 04q | A | 0           | 0           |
| rs5969    | F11                  | A/G | 04q | G | 0.004464286 | 0.004464286 |
| rs6054    | FGB                  | C/T | 04q | T | 0           | 0           |
| rs6063    | FGG                  | A/G | 04q | A | 0           | 0.004464286 |
| rs619128  | FLJ25371             | C/T | 04q | C | 0           | 0           |
| rs6532068 | HERC6                | C/T | 04q | T | 0.004504505 | 0           |
| rs6535883 |                      | C/T | 04q | C | 0.009009009 | 0.017857143 |
| rs6553695 |                      | C/T | 04q | T | 0.004464286 | 0.004464286 |
| rs662473  | FLJ25371             | C/T | 04q | T | 0           | 0           |
| rs6812670 | LOC389217, LOC650865 | A/T | 04q | A | 0           | 0.004504504 |
| rs6815360 | ODZ3                 | G/T | 04q | T | 0.03125     | 0.040540541 |
| rs6817280 | HEL308               | A/G | 04q | A | 0           | 0.004464286 |
| rs6829380 |                      | C/G | 04q | G | 0.013392857 | 0.004504505 |
| rs6830772 | LOC389217, LOC650865 | C/T | 04q | C | 0           | 0.004464286 |
| rs6843141 | KIAA1546             | A/G | 04q | A | 0.027027027 | 0.022522522 |
| rs6855526 |                      | G/T | 04q | T | 0           | 0           |
| rs726575  | FAT                  | A/G | 04q | A | 0           | 0.004464286 |

|            |           |     |     |   |             |             |
|------------|-----------|-----|-----|---|-------------|-------------|
| rs7435825  | SPP1      | A/G | 04q | A | 0.004464286 | 0.009009009 |
| rs755078   | KIAA0922  | A/C | 04q | A | 0           | 0           |
| rs7671281  | ENAM      | C/T | 04q | C | 0.03125     | 0.053571429 |
| rs7684722  | FRAS1     | A/G | 04q | A | 0           | 0.008928571 |
| rs8192111  | MGST2     | C/T | 04q | T | 0           | 0           |
| rs9016     | GC        | A/G | 04q | A | 0.009009009 | 0           |
| rs966845   | PDLIM5    | A/G | 04q | G | 0.022522523 | 0.008928571 |
| rs9991501  | HSD17B11  | C/T | 04q | T | 0.031818182 | 0.040540541 |
| rs10039751 |           | A/G | 05p | A | 0           | 0           |
| rs10043902 |           | A/T | 05p | A | 0           | 0           |
| rs1035480  | RANBP3L   | C/G | 05p | C | 0.022321429 | 0.031531531 |
| rs1061518  | SDHA      | G/T | 05p | G | 0.004464286 | 0           |
| rs12654652 | LOC391764 | A/C | 05p | A | 0           | 0.010869565 |
| rs1318743  |           | C/T | 05p | C | 0.008928571 | 0.026785714 |
| rs1805328  | RAD1      | C/G | 05p | G | 0.022321429 | 0.022727273 |
| rs180749   | AGXT2     | A/G | 05p | G | 0           | 0           |
| rs2277042  | SPEF2     | A/G | 05p | A | 0           | 0.004504504 |
| rs2277044  | SPEF2     | G/T | 05p | G | 0           | 0.004464286 |
| rs2278329  | OSMR      | A/G | 05p | A | 0           | 0.013761468 |
| rs2291703  | NIPBL     | C/T | 05p | C | 0           | 0.004464286 |
| rs2303708  | NSUN2     | A/G | 05p | A | 0           | 0           |
| rs2303743  | LIFR      | C/T | 05p | C | 0           | 0           |
| rs2303986  | ROPN1L    | A/G | 05p | A | 0.009090909 | 0           |
| rs2335585  | ZDHHC11   | A/C | 05p | A | 0           | 0           |
| rs26722    | SLC45A2   | C/T | 05p | T | 0.038461539 | 0.015151515 |
| rs2963283  |           | C/G | 05p | G | 0           | 0           |
| rs3088211  | AGXT2     | A/C | 05p | A | 0           | 0           |
| rs3195678  | AMACR     | C/T | 05p | C | 0           | 0           |
| rs3747738  | ZDHHC11   | A/G | 05p | A | 0           | 0.004504504 |
| rs3749741  | FYB       | C/T | 05p | C | 0           | 0           |
| rs3792646  | C7        | A/C | 05p | C | 0           | 0           |
| rs3806873  | KIAA0947  | A/G | 05p | G | 0.022522523 | 0.013392857 |
| rs3806874  | KIAA0947  | A/G | 05p | A | 0           | 0           |
| rs401759   |           | C/G | 05p | G | 0           | 0           |
| rs41469    | TAS2R1    | A/G | 05p | A | 0.004504504 | 0.004464286 |
| rs6182     | GHR       | G/T | 05p | T | 0.026785714 | 0.009090909 |
| rs6183     | GHR       | A/C | 05p | A | 0           | 0           |

|            |                      |     |     |   |             |             |
|------------|----------------------|-----|-----|---|-------------|-------------|
| rs6184     | GHR                  | A/C | 05p | A | 0.018018018 | 0.013761468 |
| rs673855   | C5orf39              | A/G | 05p | A | 0.022321429 | 0.0625      |
| rs6875303  | SPEF2                | A/G | 05p | G | 0           | 0.004504505 |
| rs6884696  |                      | A/T | 05p | A | 0.049107143 | 0.031531531 |
| rs6897179  | EGFLAM               | A/C | 05p | A | 0.022522522 | 0.022522522 |
| rs700241   | DAB2                 | A/G | 05p | A | 0.018181818 | 0.027027027 |
| rs7722702  |                      | G/T | 05p | T | 0.031531532 | 0.022522523 |
| rs7732300  | LOC728613, LOC731489 | C/T | 05p | T | 0.004464286 | 0.009009009 |
| rs782983   | ZNF131               | C/G | 05p | G | 0           | 0           |
| rs9312870  | FAM105B              | A/G | 05p | G | 0           | 0.004464286 |
| rs9313105  | ADAMTS16             | C/T | 05p | T | 0           | 0           |
| rs10059437 | LOC643201            | A/G | 05q | A | 0           | 0           |
| rs10180    | IL6ST                | A/T | 05q | A | 0           | 0           |
| rs1044463  | SNX2                 | G/T | 05q | T | 0           | 0           |
| rs1051309  | ANKHD1, MASK-BP3     | A/G | 05q | A | 0.017857143 | 0.013513513 |
| rs1055103  | F2R                  | C/G | 05q | C | 0           | 0           |
| rs1062020  | KIAA0372             | G/T | 05q | T | 0           | 0           |
| rs11134804 | ADAM19               | C/G | 05q | G | 0           | 0.004464286 |
| rs11134940 | CPLX2                | A/G | 05q | A | 0           | 0           |
| rs11241887 |                      | A/G | 05q | G | 0.040178571 | 0.027027027 |
| rs1143650  | HSD17B4              | C/G | 05q | G | 0           | 0           |
| rs11567997 | CDC25C               | C/G | 05q | C | 0.036036036 | 0.03125     |
| rs11568525 | SLC22A5              | C/T | 05q | T | 0           | 0           |
| rs11957794 | DTWD2                | C/T | 05q | C | 0           | 0.004464286 |
| rs12653541 | MST150               | C/T | 05q | T | 0.049107143 | 0.0625      |
| rs1363422  | NMUR2                | C/T | 05q | C | 0           | 0           |
| rs1488596  | FLJ43080             | A/G | 05q | G | 0           | 0.004545455 |
| rs1643702  | CAST                 | C/T | 05q | T | 0           | 0           |
| rs1697144  | CD180                | A/G | 05q | A | 0           | 0.004504504 |
| rs175916   | BDP1                 | C/T | 05q | T | 0           | 0           |
| rs183490   |                      | C/T | 05q | T | 0.004464286 | 0.013392857 |
| rs1870971  |                      | A/T | 05q | A | 0.027777778 | 0.054545454 |
| rs194134   | MYOZ3                | A/G | 05q | A | 0.008928571 | 0.018018018 |
| rs2004302  |                      | C/T | 05q | T | 0.013392857 | 0.004464286 |
| rs2044909  | C5orf36              | A/G | 05q | G | 0.004464286 | 0           |
| rs2069640  | CSF2                 | C/T | 05q | T | 0           | 0           |
| rs2069683  | F2RL2, IQGAP2        | A/G | 05q | G | 0           | 0.022321429 |

|           |               |     |     |   |             |             |
|-----------|---------------|-----|-----|---|-------------|-------------|
| rs2069700 | F2RL2, IQGAP2 | A/G | 05q | G | 0.027027027 | 0.03125     |
| rs2115480 | FAM71B        | A/G | 05q | A | 0           | 0           |
| rs2228647 |               | A/G | 05q | A | 0.035714286 | 0.022522522 |
| rs2230303 | GPX3, TNIP1   | G/T | 05q | G | 0           | 0.008928571 |
| rs2230523 | CD180         | A/G | 05q | G | 0           | 0           |
| rs2230524 | CD180         | C/T | 05q | C | 0.009174312 | 0.004854369 |
| rs2231471 | CDC23         | C/T | 05q | T | 0           | 0           |
| rs2233295 | TNIP1         | C/T | 05q | T | 0           | 0.004464286 |
| rs2243062 | F2RL1         | A/G | 05q | A | 0.004464286 | 0           |
| rs2243072 | F2RL1         | C/T | 05q | T | 0.03125     | 0.03125     |
| rs2266691 | CCNH          | A/G | 05q | G | 0           | 0           |
| rs2278240 | CMYA5         | A/G | 05q | A | 0.013392857 | 0           |
| rs2278370 | FAT2          | C/T | 05q | T | 0.026785714 | 0.018018018 |
| rs2278371 | FAT2          | C/T | 05q | T | 0.026785714 | 0.017857143 |
| rs2287870 | ITGA2         | C/T | 05q | C | 0           | 0.004464286 |
| rs2287932 | IQGAP2        | G/T | 05q | T | 0           | 0           |
| rs2288792 | SLIT3         | A/G | 05q | A | 0           | 0           |
| rs2289879 |               | C/T | 05q | T | 0.013392857 | 0.004464286 |
| rs2303018 | TNIP1         | A/G | 05q | A | 0           | 0           |
| rs2303078 | HMMR          | A/G | 05q | A | 0.027027027 | 0.049549549 |
| rs2370257 |               | A/G | 05q | A | 0.026785714 | 0.063063063 |
| rs2438374 | GPR98         | A/G | 05q | A | 0.044642857 | 0.053571429 |
| rs2438378 | GPR98         | A/G | 05q | G | 0.00462963  | 0.004464286 |
| rs246679  | PCDHB1        | C/G | 05q | C | 0.049107143 | 0.013636364 |
| rs2472647 |               | C/T | 05q | C | 0.022321429 | 0.03125     |
| rs2530245 | WDR55         | A/G | 05q | A | 0           | 0.004464286 |
| rs2545093 | TRIM52        | A/C | 05q | A | 0.03125     | 0.036036036 |
| rs2560306 | ZNF474        | C/T | 05q | T | 0.027027027 | 0.022727273 |
| rs26008   | FNIP1         | C/T | 05q | T | 0.044642857 | 0.084821429 |
| rs2614436 |               | C/T | 05q | T | 0.049107143 | 0.027027027 |
| rs271254  |               | C/T | 05q | T | 0           | 0.026785714 |
| rs282414  | RGNEF         | A/G | 05q | G | 0           | 0.004716981 |
| rs2887694 |               | A/C | 05q | A | 0.026785714 | 0.066964286 |
| rs2909888 | IQGAP2        | A/G | 05q | A | 0           | 0           |
| rs2913782 |               | C/G | 05q | C | 0.015463917 | 0           |
| rs30832   | SLC26A2       | A/G | 05q | A | 0.018867924 | 0.02970297  |
| rs3104230 | CDC20B        | G/T | 05q | T | 0.009009009 | 0.013761468 |

|           |           |     |     |   |             |             |
|-----------|-----------|-----|-----|---|-------------|-------------|
| rs31738   | PCDHB1    | A/G | 05q | G | 0           | 0           |
| rs3188121 |           | A/T | 05q | A | 0.033980582 | 0.09047619  |
| rs3212645 | ITGA2     | A/C | 05q | C | 0           | 0           |
| rs3213096 | IL12B     | A/G | 05q | A | 0           | 0.018018018 |
| rs32209   | FBN2      | C/T | 05q | C | 0.031531531 | 0.031531531 |
| rs3730293 |           | C/T | 05q | C | 0           | 0.004587156 |
| rs3733712 |           | G/T | 05q | G | 0           | 0           |
| rs3733905 | LRAP      | C/T | 05q | T | 0.009009009 | 0.013392857 |
| rs3733920 | CD180     | C/G | 05q | C | 0.004504504 | 0.009009009 |
| rs3733923 | DCTN4     | A/G | 05q | A | 0           | 0.004464286 |
| rs3734016 | ARTS-1    | A/G | 05q | A | 0.031818182 | 0.04054054  |
| rs3734053 | FAT2      | C/T | 05q | T | 0.004464286 | 0.004464286 |
| rs3734056 | FAT2      | C/T | 05q | T | 0           | 0           |
| rs3734091 | XRCC4     | A/C | 05q | A | 0           | 0.00462963  |
| rs3734094 | VCAN      | C/G | 05q | G | 0           | 0           |
| rs3734173 | RNUXA     | A/G | 05q | A | 0.04054054  | 0.05        |
| rs3748042 | BDP1      | A/G | 05q | G | 0           | 0           |
| rs3749671 | MRPL22    | C/T | 05q | T | 0.017857143 | 0.036036036 |
| rs3749760 | FCHSD1    | A/C | 05q | A | 0.013392857 | 0.013513513 |
| rs3749768 |           | A/G | 05q | A | 0.040178571 | 0.013513513 |
| rs3749779 | SLC25A2   | G/T | 05q | G | 0.004504504 | 0           |
| rs3822453 |           | A/T | 05q | T | 0.031818182 | 0.094594595 |
| rs3822530 | IQGAP2    | C/G | 05q | G | 0           | 0           |
| rs3822587 | POLK      | A/G | 05q | G | 0           | 0.022321429 |
| rs3822659 | WWC1      | A/C | 05q | C | 0           | 0           |
| rs3822660 | WWC1      | A/C | 05q | A | 0           | 0           |
| rs3828611 | CMYA5     | C/G | 05q | G | 0.04954955  | 0.044642857 |
| rs3896260 | CATSPER3  | G/T | 05q | G | 0           | 0.004464286 |
| rs412051  | BRD8      | C/T | 05q | T | 0.04        | 0.014563107 |
| rs423074  | CDC20B    | C/T | 05q | T | 0           | 0           |
| rs443101  | LOC51149  | C/G | 05q | C | 0           | 0           |
| rs4489037 | ANKRD31   | C/T | 05q | T | 0           | 0           |
| rs4987205 |           | C/T | 05q | T | 0           | 0           |
| rs4990389 | LOC285679 | A/G | 05q | A | 0           | 0           |
| rs525886  |           | C/G | 05q | C | 0           | 0           |
| rs5327    | DRD1      | A/C | 05q | C | 0           | 0           |
| rs5328    | DRD1      | C/G | 05q | G | 0           | 0           |



|            |             |     |     |   |             |             |
|------------|-------------|-----|-----|---|-------------|-------------|
| rs5908     | HMGCR       | A/G | 05q | G | 0.008928571 | 0.022522523 |
| rs616235   | F2RL1       | C/T | 05q | C | 0           | 0           |
| rs6195     | NR3C1       | A/G | 05q | G | 0.022522523 | 0.031531532 |
| rs6556276  | GPRIN1      | C/T | 05q | T | 0           | 0           |
| rs6594681  | MCC         | C/T | 05q | T | 0           | 0           |
| rs6595908  | ADAMTS19    | A/G | 05q | A | 0           | 0.008928571 |
| rs6860609  |             | C/T | 05q | T | 0.004464286 | 0           |
| rs6864342  | HAPLN1      | C/T | 05q | C | 0           | 0.008928571 |
| rs6865472  | JMJD1B      | A/G | 05q | G | 0           | 0.004504505 |
| rs6867257  |             | C/T | 05q | T | 0           | 0           |
| rs6869286  | LOC728780   | A/G | 05q | G | 0           | 0.004464286 |
| rs6872614  | FAT2        | A/G | 05q | A | 0           | 0           |
| rs6873053  | TIMD4       | A/G | 05q | A | 0.04054054  | 0.081081081 |
| rs6881827  |             | C/T | 05q | T | 0           | 0           |
| rs6890689  | MYOT        | A/C | 05q | A | 0.004464286 | 0           |
| rs6892335  | FAT2        | A/G | 05q | A | 0.008928571 | 0           |
| rs6894728  | FLJ43080    | C/T | 05q | T | 0           | 0.004545455 |
| rs6896658  |             | G/T | 05q | T | 0           | 0           |
| rs7700833  | PCDHB8      | C/T | 05q | T | 0.009009009 | 0.004504505 |
| rs7705168  | FBXL21      | A/T | 05q | A | 0           | 0           |
| rs7706614  | JMJD1B      | A/G | 05q | A | 0.022522522 | 0.040909091 |
| rs7709531  | LOC728264   | A/G | 05q | A | 0           | 0           |
| rs7715021  | APBB3       | C/G | 05q | G | 0           | 0           |
| rs7722386  | GPX3, TNIP1 | A/G | 05q | G | 0           | 0           |
| rs7724840  |             | C/T | 05q | T | 0           | 0           |
| rs7727835  | ISCA1L      | A/C | 05q | C | 0.004464286 | 0           |
| rs7729495  | GPR98       | C/T | 05q | C | 0           | 0           |
| rs7730228  | FNIP1       | A/C | 05q | C | 0.004464286 | 0.004464286 |
| rs7731575  | TIMD4       | C/T | 05q | T | 0           | 0           |
| rs878103   |             | G/T | 05q | T | 0           | 0           |
| rs888857   | PRDM6       | A/C | 05q | C | 0.031531532 | 0.085585586 |
| rs889057   | SOX30       | A/G | 05q | A | 0           | 0           |
| rs917535   | PCDHB11     | C/T | 05q | T | 0.022321429 | 0.022321429 |
| rs9324996  | PRELID2     | C/T | 05q | C | 0.004545454 | 0           |
| rs988574   | ITGA1       | A/G | 05q | G | 0.03125     | 0.013392857 |
| rs1024196  | DST         | A/G | 06p | G | 0.049107143 | 0.040178571 |
| rs10305492 | GLP1R       | A/G | 06p | A | 0.017857143 | 0.022321429 |

|            |               |     |     |   |             |             |
|------------|---------------|-----|-----|---|-------------|-------------|
| rs1042151  | HLA-DPB1      | A/G | 06p | G | 0           | 0.014285714 |
| rs1042153  | HLA-DPB1      | A/G | 06p | A | 0.023364486 | 0.042056075 |
| rs1042335  | HLA-DPB1      | C/T | 06p | T | 0.019230769 | 0           |
| rs1046141  |               | A/G | 06p | G | 0.008928571 | 0.004464286 |
| rs1051566  | GSTA1         | A/G | 06p | A | 0           | 0           |
| rs1051798  | MICA          | C/T | 06p | T | 0           | 0           |
| rs1057933  | BTN3A1        | A/G | 06p | A | 0.004504504 | 0           |
| rs1062505  | GPLD1         | A/G | 06p | A | 0           | 0           |
| rs10946705 | KIAA0319      | C/G | 06p | G | 0           | 0           |
| rs1126511  | HLA-DPB1      | G/T | 06p | T | 0.009345794 | 0.023809524 |
| rs1126513  | HLA-DPB1      | G/T | 06p | T | 0.023364486 | 0.046296296 |
| rs1142345  | TPMT          | A/G | 06p | G | 0.027272727 | 0.054545455 |
| rs11465553 | IL17F         | A/G | 06p | A | 0.040178571 | 0.035714286 |
| rs1150674  | ZNF389        | A/G | 06p | G | 0.045045045 | 0.071428571 |
| rs11965420 |               | A/G | 06p | G | 0.008928571 | 0.004504505 |
| rs11969769 | MOCS1         | G/T | 06p | T | 0.017857143 | 0.013392857 |
| rs12212092 | TRIM10        | C/T | 06p | T | 0.049107143 | 0.066964286 |
| rs1225746  | SYCP2L        | C/T | 06p | C | 0.004464286 | 0.013888889 |
| rs1226475  | GPR110        | C/T | 06p | C | 0.004464286 | 0.017857143 |
| rs12530380 | CYP21A2, TNXB | A/T | 06p | A | 0           | 0           |
| rs1330796  |               | A/G | 06p | G | 0           | 0           |
| rs1459675  | ZNF318        | A/G | 06p | A | 0.004545454 | 0.008928571 |
| rs15245    | BTBD9         | G/T | 06p | T | 0           | 0           |
| rs1570624  | EFHC1         | C/T | 06p | T | 0.013392857 | 0.004464286 |
| rs1611610  |               | G/T | 06p | T | 0.040909091 | 0.013636364 |
| rs1635     | NKAPL         | G/T | 06p | T | 0.049107143 | 0.051401869 |
| rs1678674  | DNAH8         | A/G | 06p | A | 0.044642857 | 0.013392857 |
| rs176250   | BRD2          | A/G | 06p | A | 0.013513513 | 0.009174312 |
| rs1772256  | GPLD1         | A/G | 06p | G | 0.015306122 | 0.015957447 |
| rs1802127  | MSH5, C6orf26 | C/T | 06p | T | 0.017857143 | 0.044642857 |
| rs1802323  | LY86          | A/G | 06p | G | 0           | 0.004464286 |
| rs1805018  | PLA2G7        | C/T | 06p | C | 0.035714286 | 0.049107143 |
| rs186556   | SLC29A1       | C/T | 06p | T | 0           | 0           |
| rs1923185  | GMNN          | A/C | 06p | C | 0.022727273 | 0.044642857 |
| rs1980600  | BTN1A1        | C/T | 06p | C | 0           | 0.004464286 |
| rs2070600  | AGER, PBX2    | A/G | 06p | A | 0.035714286 | 0.044642857 |
| rs2071289  | AGPAT1, EGFL8 | G/T | 06p | T | 0           | 0           |

|           |                     |     |     |   |             |             |
|-----------|---------------------|-----|-----|---|-------------|-------------|
| rs2074467 | OR10C1              | G/T | 06p | T | 0           | 0           |
| rs2074468 | OR10C1              | A/G | 06p | A | 0.013513513 | 0.013392857 |
| rs2076185 | C6orf105            | A/G | 06p | A | 0.040178571 | 0.03125     |
| rs2076299 | DSP                 | A/G | 06p | G | 0.045045045 | 0.05        |
| rs2076484 | UBD                 | C/T | 06p | C | 0.040178571 | 0.017857143 |
| rs2076486 | UBD                 | C/T | 06p | C | 0.040178571 | 0.017857143 |
| rs2076487 | UBD                 | C/G | 06p | G | 0.035714286 | 0.017857143 |
| rs2076489 | GABBR1              | C/T | 06p | C | 0           | 0           |
| rs2228218 | HIVEP1              | A/G | 06p | A | 0           | 0           |
| rs2230239 | MCM3                | C/T | 06p | T | 0           | 0           |
| rs2230653 | HIST1H1C            | C/T | 06p | T | 0.017857143 | 0.03125     |
| rs2233975 | C6orf15             | A/G | 06p | G | 0           | 0.018867925 |
| rs2234028 | TBCC                | C/T | 06p | T | 0           | 0.00462963  |
| rs2254847 |                     | A/T | 06p | T | 0.026785714 | 0.049107143 |
| rs2274515 | PEX6                | A/G | 06p | A | 0.045045045 | 0.045454545 |
| rs2281388 |                     | C/T | 06p | T | 0.022321429 | 0.008928571 |
| rs2295666 | BAT4                | C/T | 06p | T | 0           | 0           |
| rs2296333 | ITPR3               | A/C | 06p | A | 0           | 0           |
| rs2298090 | HIST1H1E, HIST1H2BD | A/G | 06p | G | 0.013392857 | 0.017857143 |
| rs2307306 | GMNN                | C/T | 06p | T | 0.008928571 | 0.026785714 |
| rs2307307 | GMNN                | C/G | 06p | C | 0           | 0           |
| rs2535241 | ZFP57               | A/T | 06p | T | 0.026785714 | 0.049107143 |
| rs2621330 |                     | A/G | 06p | A | 0.022321429 | 0.040909091 |
| rs2734318 | C4B                 | C/G | 06p | C | 0.00462963  | 0           |
| rs2736158 | BAT2                | C/G | 06p | G | 0.027777778 | 0.018518519 |
| rs2736182 | AIF1                | C/T | 06p | T | 0.018018018 | 0.022321429 |
| rs2744550 | KIAA0319            | C/T | 06p | C | 0.004464286 | 0.004504504 |
| rs2744559 | KIAA0319            | C/T | 06p | T | 0.022522523 | 0.009009009 |
| rs2758910 | KCNK17              | C/T | 06p | T | 0           | 0           |
| rs3098019 | HLA-A, HLA-A29.1    | G/T | 06p | G | 0           | 0           |
| rs3130645 | MDC1                | A/G | 06p | G | 0.049107143 | 0.104545455 |
| rs3176950 | HLA-DPB1            | A/G | 06p | A | 0           | 0.009615385 |
| rs3734401 | NEDD9               | A/G | 06p | A | 0.004545454 | 0.009009009 |
| rs3734539 | BTN2A1              | C/T | 06p | T | 0           | 0           |
| rs3734814 | HLA-F               | A/C | 06p | C | 0           | 0           |
| rs3749952 | LY6G6D              | G/T | 06p | G | 0.018018018 | 0.027522936 |
| rs3765310 | ALDH5A1             | C/T | 06p | T | 0           | 0.00990099  |

|           |                 |     |     |   |             |             |
|-----------|-----------------|-----|-----|---|-------------|-------------|
| rs3798751 | SYCP2L          | A/G | 06p | G | 0.040540541 | 0.027272727 |
| rs386014  |                 | C/G | 06p | G | 0.045045045 | 0.013636364 |
| rs3891160 |                 | C/G | 06p | G | 0.040178571 | 0.049107143 |
| rs3891161 |                 | C/T | 06p | T | 0           | 0           |
| rs3891162 |                 | C/T | 06p | C | 0.008928571 | 0           |
| rs409029  | ZNF452          | C/T | 06p | C | 0           | 0           |
| rs4127052 |                 | C/T | 06p | C | 0           | 0           |
| rs4134982 | E2F3            | A/G | 06p | A | 0.004504504 | 0.013392857 |
| rs4151648 | CFB, C2         | C/T | 06p | T | 0           | 0           |
| rs4151651 | CFB             | A/G | 06p | A | 0.026785714 | 0.026785714 |
| rs4151659 | CFB, RDBP       | A/G | 06p | G | 0.009090909 | 0.026785714 |
| rs4151667 | CFB             | A/T | 06p | A | 0.036363636 | 0.03125     |
| rs4947338 | C6orf10         | A/C | 06p | C | 0.017857143 | 0.009009009 |
| rs4987115 | BAK1            | C/T | 06p | T | 0           | 0           |
| rs505760  | EFHC1           | A/G | 06p | A | 0           | 0           |
| rs539351  | GCNT2           | C/G | 06p | C | 0           | 0           |
| rs543580  | TBC1D7          | A/C | 06p | C | 0.004504505 | 0.017857143 |
| rs567083  | MAK             | A/G | 06p | A | 0.018181818 | 0.031818182 |
| rs5743651 | LY86            | A/G | 06p | G | 0           | 0.004504505 |
| rs5984    | F13A1           | C/T | 06p | T | 0           | 0           |
| rs6413478 | EDN1            | A/G | 06p | A | 0           | 0.004545454 |
| rs6459165 | DST             | G/T | 06p | G | 0.008928571 | 0.004464286 |
| rs6596807 |                 | A/G | 06p | G | 0.018018018 | 0.027027027 |
| rs6596842 |                 | A/C | 06p | C | 0           | 0           |
| rs6900196 | HIVEP1          | A/G | 06p | A | 0.004545454 | 0.008928571 |
| rs6915800 | SLC44A4         | A/G | 06p | A | 0           | 0           |
| rs6922302 | ZNF323          | C/G | 06p | G | 0           | 0.008928571 |
| rs6924628 | GPLD1           | C/T | 06p | T | 0.013392857 | 0.004545455 |
| rs6928338 | KLHL31          | G/T | 06p | T | 0           | 0           |
| rs6928954 |                 | C/T | 06p | T | 0.008928571 | 0.004464286 |
| rs723580  |                 | A/G | 06p | G | 0.044642857 | 0.066964286 |
| rs733743  | ZKSCAN3         | C/G | 06p | G | 0.036697248 | 0.060185185 |
| rs740884  | GABBR1          | C/T | 06p | T | 0.04954955  | 0.075892857 |
| rs763780  | IL17F           | C/T | 06p | C | 0.022321429 | 0.053571429 |
| rs766773  | GFOD1, C6orf114 | A/T | 06p | T | 0           | 0.009009009 |
| rs7749306 | C6orf52         | G/T | 06p | T | 0.017857143 | 0.026785714 |
| rs7764491 |                 | C/G | 06p | G | 0.03125     | 0.040178571 |

|            |                 |     |     |   |             |             |
|------------|-----------------|-----|-----|---|-------------|-------------|
| rs805295   | C6orf21         | A/G | 06p | A | 0.026785714 | 0.022522522 |
| rs910161   |                 | C/T | 06p | T | 0.026785714 | 0.008928571 |
| rs9260160  |                 | C/G | 06p | C | 0.009009009 | 0.004716981 |
| rs9266161  |                 | A/G | 06p | G | 0.004854369 | 0           |
| rs9277343  | HLA-DPB1        | C/G | 06p | G | 0           | 0.004901961 |
| rs9277345  | HLA-DPB1        | A/T | 06p | A | 0           | 0           |
| rs9277354  | HLA-DPB1        | A/G | 06p | A | 0.010752688 | 0.040229885 |
| rs9332739  | C2              | C/G | 06p | C | 0.035714286 | 0.03125     |
| rs9333554  | POLH            | C/T | 06p | C | 0           | 0           |
| rs9333555  | POLH            | A/G | 06p | G | 0.018181818 | 0.027777778 |
| rs9348906  |                 | G/T | 06p | G | 0           | 0.004464286 |
| rs9380030  | OR2B6           | A/G | 06p | G | 0.036697248 | 0.022522523 |
| rs9380345  |                 | C/T | 06p | T | 0           | 0           |
| rs9381231  | CUL7            | C/T | 06p | C | 0           | 0           |
| rs10081139 | NT5E            | C/T | 06q | C | 0.049107143 | 0.080357143 |
| rs10334    | PSMB1           | G/T | 06q | T | 0           | 0           |
| rs1044057  | STX7            | A/G | 06q | A | 0           | 0           |
| rs1048197  | SMPD2           | A/G | 06q | A | 0.036036036 | 0.058558559 |
| rs10484830 | C6orf167        | A/G | 06q | A | 0.03125     | 0.045045045 |
| rs10541    | PSMB1           | A/T | 06q | A | 0           | 0           |
| rs1061347  | SENP6           | A/G | 06q | A | 0           | 0           |
| rs10944433 | ACY1L2          | A/G | 06q | G | 0           | 0.004504505 |
| rs109836   | HIVEP2          | C/T | 06q | T | 0.026785714 | 0.027027027 |
| rs11153982 |                 | A/C | 06q | C | 0           | 0           |
| rs11154964 | KIAA1244, PBOV1 | A/G | 06q | G | 0           | 0.004504505 |
| rs12526094 | TLL2            | A/G | 06q | A | 0           | 0           |
| rs1262686  | GPR126          | A/G | 06q | A | 0.008928571 | 0.008928571 |
| rs130060   | HTR1B           | G/T | 06q | G | 0.018018018 | 0.009009009 |
| rs1537172  | TCP10, TCP10L2  | G/T | 06q | T | 0           | 0           |
| rs1555498  | IL20RA          | C/T | 06q | C | 0.017857143 | 0.008928571 |
| rs1571767  | TIAM2, TFB1M    | A/T | 06q | A | 0.004464286 | 0.009009009 |
| rs17621    | DDO             | C/T | 06q | T | 0           | 0           |
| rs17623    | DDO             | G/T | 06q | G | 0           | 0           |
| rs1801474  | PARK2           | A/G | 06q | A | 0.022522522 | 0.004464286 |
| rs1887415  | IFNGR1          | C/T | 06q | C | 0           | 0           |
| rs1967446  | BCLAF1          | A/C | 06q | C | 0           | 0           |
| rs2027063  | TCTE3           | A/C | 06q | A | 0.008928571 | 0.03125     |

|           |          |     |     |   |             |             |
|-----------|----------|-----|-----|---|-------------|-------------|
| rs210622  | DCBLD1   | A/G | 06q | A | 0           | 0.004464286 |
| rs210968  | ROS1     | A/C | 06q | C | 0           | 0           |
| rs2173105 |          | A/G | 06q | A | 0.027522936 | 0.014423077 |
| rs2228961 | GJA1     | A/G | 06q | A | 0           | 0.004464286 |
| rs2230143 | VIL2     | C/G | 06q | C | 0           | 0           |
| rs2235076 | GRIK2    | A/G | 06q | A | 0.036036036 | 0.022321429 |
| rs2273510 | CCDC28A  | C/T | 06q | T | 0.008928571 | 0.022522523 |
| rs2279381 | FABP7    | A/G | 06q | A | 0           | 0           |
| rs2291388 | SYTL3    | C/T | 06q | T | 0           | 0           |
| rs2294763 | KLHL32   | A/G | 06q | G | 0.018181818 | 0.017857143 |
| rs2295837 | FIG4     | A/T | 06q | T | 0.036036036 | 0.053571429 |
| rs2297852 | EPB41L2  | G/T | 06q | T | 0           | 0           |
| rs2306914 | SYNE1    | A/G | 06q | A | 0.032110092 | 0.019230769 |
| rs2306942 | LAMA2    | C/T | 06q | T | 0.049107143 | 0.044642857 |
| rs2307365 | ORC3L    | A/C | 06q | A | 0           | 0           |
| rs2307389 | ORC3L    | A/G | 06q | A | 0.044444444 | 0.109195402 |
| rs3218595 | REV3L    | G/T | 06q | T | 0           | 0           |
| rs3218599 | REV3L    | C/G | 06q | C | 0.035714286 | 0.004504504 |
| rs3734305 | NHSL1    | C/T | 06q | T | 0           | 0           |
| rs3734638 | HEY2     | C/T | 06q | T | 0           | 0           |
| rs3734881 | PHF3     | A/G | 06q | A | 0           | 0           |
| rs3736706 | KIAA1244 | C/T | 06q | T | 0           | 0           |
| rs3749930 | NOX3     | G/T | 06q | T | 0.036036036 | 0.04954955  |
| rs3757370 | RARS2    | C/T | 06q | C | 0.022321429 | 0.008928571 |
| rs3798220 | LPA      | C/T | 06q | C | 0.022321429 | 0.013392857 |
| rs3799896 | CASP8AP2 | C/T | 06q | T | 0           | 0           |
| rs3811069 | FUT9     | C/T | 06q | T | 0           | 0.004545455 |
| rs4144164 | COQ3     | A/G | 06q | A | 0           | 0.009615385 |
| rs4252128 | PLG      | C/T | 06q | T | 0.008928571 | 0.013392857 |
| rs4259257 | TIAM2    | C/T | 06q | T | 0           | 0           |
| rs433243  | IL20RA   | A/G | 06q | A | 0.017857143 | 0.027027027 |
| rs4559074 | MAP3K4   | A/G | 06q | G | 0.013392857 | 0.045045045 |
| rs4707557 | MDN1     | A/C | 06q | C | 0.02631579  | 0.06        |
| rs475076  | RNF217   | A/G | 06q | A | 0           | 0.014150943 |
| rs5029941 | TNFAIP3  | C/T | 06q | T | 0           | 0           |
| rs5029942 |          | G/T | 06q | G | 0.026785714 | 0.031531531 |
| rs529156  | ROS1     | A/C | 06q | C | 0.004761905 | 0           |

|            |                   |     |     |   |             |             |
|------------|-------------------|-----|-----|---|-------------|-------------|
| rs6303     | HTR1E             | C/T | 06q | T | 0           | 0           |
| rs633382   |                   | C/T | 06q | T | 0.044642857 | 0.040178571 |
| rs6413491  | IGF2R             | A/G | 06q | A | 0           | 0.004464286 |
| rs6454127  | GLULD1            | G/T | 06q | G | 0           | 0.004464286 |
| rs6569336  | TRDN              | G/T | 06q | T | 0           | 0.004504505 |
| rs6569834  | VNN3              | A/G | 06q | G | 0.009090909 | 0.027272727 |
| rs6936679  | SMOC2             | A/G | 06q | A | 0           | 0           |
| rs6940875  | AHI1              | G/T | 06q | G | 0           | 0           |
| rs7356932  | CD109             | A/G | 06q | A | 0           | 0           |
| rs7356974  | ME1               | C/T | 06q | T | 0           | 0           |
| rs764264   | VNN3              | C/T | 06q | C | 0           | 0           |
| rs7743702  |                   | C/T | 06q | C | 0.022522522 | 0.013636364 |
| rs7750948  |                   | C/G | 06q | G | 0.049107143 | 0.026785714 |
| rs7775119  | SYNE1             | C/G | 06q | G | 0.008928571 | 0           |
| rs8191746  | IGF2R             | C/T | 06q | T | 0           | 0           |
| rs8191842  | IGF2R             | C/T | 06q | T | 0           | 0           |
| rs8191844  | IGF2R             | C/G | 06q | G | 0           | 0           |
| rs8192627  | TAAR8             | A/C | 06q | C | 0.022321429 | 0.0625      |
| rs8192646  | TAAR2             | C/T | 06q | T | 0.045045045 | 0.017857143 |
| rs8192683  | ENPP1             | C/G | 06q | C | 0           | 0           |
| rs9295036  | KIF25             | A/C | 06q | A | 0.004761905 | 0.004761905 |
| rs9320350  | BXDC1             | C/G | 06q | G | 0.004464286 | 0           |
| rs9321309  | ENPP3             | A/G | 06q | A | 0           | 0.004464286 |
| rs9321712  | TXLNB             | C/T | 06q | T | 0.004504505 | 0           |
| rs9362667  | ANKRD6            | A/G | 06q | A | 0           | 0.004545454 |
| rs9387944  | C6orf170          | G/T | 06q | G | 0           | 0           |
| rs9445598  | RCADH5, LOC647346 | A/C | 06q | A | 0           | 0           |
| rs9483495  | VNN3              | C/T | 06q | T | 0.045045045 | 0.049107143 |
| rs9489410  |                   | C/G | 06q | G | 0.026785714 | 0.022321429 |
| rs10230120 | COBL              | G/T | 07p | T | 0.040540541 | 0.053571429 |
| rs1050916  | BLVRA             | A/G | 07p | G | 0.004545455 | 0.018181818 |
| rs1059508  | VPS41             | A/G | 07p | A | 0.026785714 | 0.022522522 |
| rs1063257  | EIF3B             | A/C | 07p | A | 0           | 0.004464286 |
| rs1065647  | ZMIZ2             | C/G | 07p | C | 0           | 0           |
| rs1129670  | PGAM2             | A/C | 07p | C | 0           | 0           |
| rs1138957  | SCIN              | A/T | 07p | T | 0           | 0           |
| rs11575302 | DDC               | C/T | 07p | T | 0           | 0.004545455 |

|            |           |     |     |   |             |             |
|------------|-----------|-----|-----|---|-------------|-------------|
| rs11575542 | DDC       | A/G | 07p | A | 0           | 0.004761905 |
| rs11976848 | ABCB5     | A/G | 07p | G | 0           | 0.008928571 |
| rs12671170 | 7A5       | G/T | 07p | G | 0           | 0.013392857 |
| rs1468595  | GLCC11    | A/T | 07p | T | 0.022321429 | 0.017857143 |
| rs16139    | NPY       | A/G | 07p | G | 0.035714286 | 0.027027027 |
| rs1637215  | NUPL2     | C/G | 07p | C | 0.022727273 | 0.031531531 |
| rs1805318  | PMS2      | A/T | 07p | T | 0.033980583 | 0.023809524 |
| rs1805324  | PMS2      | A/G | 07p | A | 0.009009009 | 0.026785714 |
| rs196586   | KIAA1706  | A/G | 07p | G | 0.031531532 | 0.031531532 |
| rs2069860  | IL6       | A/T | 07p | T | 0.008928571 | 0.013392857 |
| rs2074000  | ABCB5     | A/C | 07p | A | 0           | 0           |
| rs2074599  | THSD7A    | C/G | 07p | G | 0           | 0           |
| rs2228078  | GHRHR     | C/T | 07p | C | 0.017857143 | 0.022321429 |
| rs2232125  |           | C/T | 07p | T | 0.008928571 | 0.018018018 |
| rs2237493  | MEOX2     | G/T | 07p | G | 0.004464286 | 0           |
| rs2241445  | MGC12966  | C/T | 07p | T | 0.035714286 | 0.036036036 |
| rs2293362  | TNS3      | C/G | 07p | C | 0.022522522 | 0.022522522 |
| rs2965416  | DNAH11    | C/T | 07p | C | 0.013392857 | 0.03125     |
| rs3750092  | WIPF3     | C/T | 07p | C | 0.03125     | 0.071428571 |
| rs3750103  | CHN2      | C/T | 07p | C | 0.049107143 | 0.040178571 |
| rs4245575  | SUMF2     | A/C | 07p | C | 0           | 0.004464286 |
| rs4722236  |           | A/G | 07p | A | 0.013392857 | 0.004464286 |
| rs4723740  |           | C/T | 07p | T | 0.035714286 | 0.067567568 |
| rs4986826  | AHR       | A/G | 07p | A | 0.013513513 | 0           |
| rs6968037  | tcag7.893 | A/T | 07p | T | 0           | 0           |
| rs6970210  | INMT      | A/G | 07p | G | 0.004464286 | 0           |
| rs7795984  | tcag7.956 | C/G | 07p | C | 0.013392857 | 0.023148148 |
| rs7799540  | CCDC129   | C/T | 07p | T | 0.004464286 | 0.004504505 |
| rs7804532  | COL28A1   | C/G | 07p | G | 0.044642857 | 0.040540541 |
| rs7804851  | POU6F2    | A/G | 07p | A | 0           | 0           |
| rs876306   | DFNA5     | C/T | 07p | C | 0           | 0           |
| rs9691042  |           | A/G | 07p | G | 0.004545455 | 0           |
| rs10232050 | PCLO      | C/T | 07q | C | 0.004464286 | 0           |
| rs10239950 |           | C/G | 07q | C | 0.040178571 | 0.049107143 |
| rs10241894 | KIAA0265  | A/C | 07q | A | 0           | 0.004464286 |
| rs10261848 | PCLO      | G/T | 07q | G | 0           | 0.004464286 |
| rs10279823 |           | C/T | 07q | T | 0           | 0           |



|            |                   |     |     |   |             |             |
|------------|-------------------|-----|-----|---|-------------|-------------|
| rs10282312 | CLCN1             | G/T | 07q | G | 0.018018018 | 0.017857143 |
| rs10372565 |                   | G/T | 07q | G | 0           | 0           |
| rs10487647 | PCLO              | A/G | 07q | G | 0           | 0           |
| rs1050101  | SMARCD3           | C/T | 07q | T | 0.004464286 | 0           |
| rs1050418  | SRPK2             | A/C | 07q | A | 0           | 0           |
| rs1063242  | AKAP9             | C/T | 07q | C | 0           | 0.018018018 |
| rs1109968  | KIAA1505          | A/G | 07q | G | 0.036036036 | 0.0625      |
| rs11465333 | CCL26             | G/T | 07q | G | 0.01980198  | 0.01980198  |
| rs11761306 | PILRB             | A/G | 07q | G | 0.023148148 | 0           |
| rs11771799 | PILRB             | C/T | 07q | C | 0           | 0           |
| rs12671089 |                   | G/T | 07q | T | 0.005       | 0           |
| rs1465227  | VIPR2             | C/T | 07q | T | 0.004464286 | 0           |
| rs1525626  | IQUB              | C/G | 07q | G | 0           | 0           |
| rs1527482  | SEMA3C            | A/G | 07q | A | 0.035       | 0.015463917 |
| rs1551630  |                   | C/T | 07q | T | 0           | 0.004464286 |
| rs17228    |                   | C/T | 07q | T | 0           | 0.004464286 |
| rs1800100  | CFTR              | C/T | 07q | T | 0.008928571 | 0.013392857 |
| rs1803256  | CD36              | G/T | 07q | T | 0           | 0           |
| rs1830035  | ZNF679            | C/T | 07q | C | 0.049107143 | 0.044642857 |
| rs1916830  | ZNF804B           | A/G | 07q | A | 0           | 0.008928571 |
| rs2041049  | DBF4              | C/T | 07q | C | 0.035714286 | 0.018018018 |
| rs2073793  | SAMD9L            | A/G | 07q | G | 0.008928571 | 0.017857143 |
| rs2074130  | DOCK4             | C/T | 07q | T | 0           | 0           |
| rs2074749  | LAMB4             | A/G | 07q | A | 0           | 0.008928571 |
| rs2109351  |                   | A/G | 07q | A | 0           | 0           |
| rs2229109  | ABCB1             | A/G | 07q | A | 0.049107143 | 0.03125     |
| rs2229188  | CYP51A1           | C/T | 07q | C | 0           | 0           |
| rs2229860  | RELN              | C/G | 07q | G | 0           | 0           |
| rs2233578  | PAX4              | C/T | 07q | T | 0           | 0           |
| rs2233580  | PAX4              | A/G | 07q | A | 0           | 0.009174312 |
| rs2234000  | TAS2R4            | C/T | 07q | T | 0           | 0           |
| rs2234015  | TAS2R5            | A/G | 07q | A | 0           | 0           |
| rs2242030  | FAM40B            | C/T | 07q | T | 0           | 0.004464286 |
| rs2267821  | GTF2IRD1, WBSCR23 | G/T | 07q | G | 0           | 0.013513513 |
| rs2272330  | MGAM              | G/T | 07q | T | 0.018018018 | 0.022321429 |
| rs2288240  | WDR91             | C/T | 07q | T | 0.004504505 | 0           |
| rs2293266  | KEL               | C/T | 07q | C | 0           | 0           |

|           |                       |     |     |   |             |             |
|-----------|-----------------------|-----|-----|---|-------------|-------------|
| rs2293283 | GIMAP8                | C/T | 07q | C | 0           | 0.004464286 |
| rs2293766 | ZAN                   | C/T | 07q | T | 0.037037037 | 0.03271028  |
| rs2301635 | SLC26A3               | C/T | 07q | T | 0           | 0           |
| rs2302131 | NUB1                  | C/T | 07q | C | 0           | 0           |
| rs2307413 | ORC5L                 | A/T | 07q | T | 0           | 0           |
| rs2402730 | hCG_1651160, tcag7.51 | A/G | 07q | G | 0           | 0           |
| rs2709859 | WDR60                 | C/G | 07q | G | 0.022321429 | 0.004504505 |
| rs2792441 | ABCF2                 | A/G | 07q | A | 0           | 0           |
| rs2896399 | METTL2B, METTL2A      | C/T | 07q | C | 0           | 0           |
| rs292501  | TMEM140, C7orf49      | A/T | 07q | T | 0           | 0.009009009 |
| rs292657  | LOC730216, LOC730334  | C/G | 07q | G | 0.040178571 | 0.04954955  |
| rs2960999 | TYW1                  | C/T | 07q | T | 0.009259259 | 0           |
| rs2974938 | PPP1R3A               | A/T | 07q | T | 0           | 0.004464286 |
| rs3181009 | NAPE-PLD              | A/G | 07q | G | 0.004464286 | 0           |
| rs367923  | MKLN1                 | G/T | 07q | G | 0           | 0.004464286 |
| rs3734990 |                       | C/T | 07q | T | 0.046728972 | 0.024271845 |
| rs3735051 | CPA4                  | A/C | 07q | A | 0           | 0           |
| rs3735156 | MLL3                  | C/G | 07q | C | 0.03125     | 0.009009009 |
| rs3735354 | TBXAS1                | C/T | 07q | T | 0           | 0           |
| rs3737258 | FAM62B                | A/G | 07q | A | 0           | 0           |
| rs3752368 | PTPRN2                | C/T | 07q | T | 0           | 0           |
| rs3757651 | DOCK4                 | A/C | 07q | A | 0.008928571 | 0           |
| rs3765187 |                       | A/G | 07q | A | 0           | 0           |
| rs3778922 | GALNT11               | A/C | 07q | A | 0           | 0           |
| rs3779536 | FSCN3                 | A/C | 07q | A | 0.017857143 | 0.027027027 |
| rs3800791 | ASB10                 | A/G | 07q | A | 0           | 0.004464286 |
| rs3801295 | LMTK2                 | A/G | 07q | A | 0           | 0           |
| rs3815456 | STYXL1                | C/T | 07q | T | 0           | 0           |
| rs418570  | COL1A2                | G/T | 07q | T | 0           | 0           |
| rs42183   | RHBDD2                | C/T | 07q | T | 0.026785714 | 0.044642857 |
| rs4236655 | AGBL3                 | C/G | 07q | G | 0           | 0.008928571 |
| rs4252499 | TRPV5                 | A/G | 07q | A | 0.009009009 | 0.013392857 |
| rs4529    | TBXAS1                | C/G | 07q | G | 0           | 0           |
| rs458273  | MKLN1                 | C/G | 07q | G | 0           | 0           |
| rs4607487 | ZNF117                | A/G | 07q | A | 0.035714286 | 0.049107143 |
| rs466096  | MKLN1                 | G/T | 07q | T | 0.004464286 | 0.004464286 |
| rs4728137 | CCDC136               | C/G | 07q | C | 0           | 0           |

|            |                 |     |     |   |             |             |
|------------|-----------------|-----|-----|---|-------------|-------------|
| rs4732519  | TMEM120A        | A/G | 07q | A | 0           | 0           |
| rs5760     | TBXAS1          | G/T | 07q | T | 0           | 0           |
| rs5763     | TBXAS1          | A/C | 07q | A | 0.017857143 | 0.018181818 |
| rs5768     | TBXAS1          | G/T | 07q | T | 0.013636364 | 0           |
| rs6460207  | LOC441239       | C/G | 07q | G | 0.040540541 | 0.049107143 |
| rs6464201  | GALNT11         | C/T | 07q | T | 0           | 0           |
| rs6958510  | LOC730441       | A/T | 07q | T | 0.009009009 | 0.004545455 |
| rs6965052  | ZNF425          | A/T | 07q | A | 0.004464286 | 0           |
| rs6969304  | CCT8L1          | A/T | 07q | A | 0           | 0           |
| rs6969632  | CNOT4           | C/T | 07q | T | 0           | 0           |
| rs6974800  |                 | A/G | 07q | A | 0           | 0           |
| rs758683   | LOC731075       | G/T | 07q | T | 0.008928571 | 0.013392857 |
| rs769194   | GRM8            | C/G | 07q | G | 0.004545455 | 0           |
| rs7790578  | ZNF117          | C/G | 07q | G | 0.036036036 | 0.050925926 |
| rs7796589  | DPY19L2P2       | C/T | 07q | C | 0.004464286 | 0           |
| rs7810767  | NUP205          | C/G | 07q | G | 0.004464286 | 0           |
| rs798911   | FLJ21986        | A/C | 07q | C | 0           | 0           |
| rs8187797  |                 | C/G | 07q | C | 0           | 0           |
| rs8187801  |                 | A/G | 07q | A | 0           | 0           |
| rs8192687  | PPP1R3A         | A/G | 07q | A | 0.009009009 | 0.027272727 |
| rs8192833  | TBXAS1          | A/G | 07q | A | 0.008928571 | 0.009009009 |
| rs846664   | TAS2R16         | G/T | 07q | G | 0           | 0           |
| rs855677   | SSPO            | C/T | 07q | T | 0           | 0           |
| rs9656065  | MUC17           | A/G | 07q | A | 0           | 0           |
| rs10103355 | ASAH1           | A/G | 08p | A | 0.004464286 | 0.013392857 |
| rs10104250 |                 | G/T | 08p | T | 0.049107143 | 0.044642857 |
| rs10503867 | TUBB            | A/C | 08p | A | 0           | 0.004504504 |
| rs1060130  | ANK1, LOC727725 | A/G | 08p | A | 0           | 0           |
| rs11203497 |                 | A/T | 08p | T | 0           | 0           |
| rs11574395 | WRN             | A/G | 08p | A | 0           | 0           |
| rs11785822 | RP1L1           | G/T | 08p | G | 0           | 0.00462963  |
| rs11984691 | CSMD1           | C/T | 08p | T | 0.022321429 | 0.018018018 |
| rs15481    | SDAD1           | A/C | 08p | C | 0           | 0           |
| rs1799931  | NAT2            | A/G | 08p | A | 0.01980198  | 0.010204082 |
| rs1800390  | WRN             | A/G | 08p | G | 0.004504505 | 0.004545455 |
| rs1801279  | NAT2            | A/G | 08p | A | 0           | 0           |
| rs1805158  | NAT2            | C/T | 08p | T | 0           | 0           |

|           |                 |     |     |   |             |             |
|-----------|-----------------|-----|-----|---|-------------|-------------|
| rs196864  | NEFM            | G/T | 08p | G | 0.049107143 | 0.058558559 |
| rs2229126 | ADRA1A          | A/T | 08p | T | 0.035714286 | 0.036697248 |
| rs2272736 | IKKB, LOC727725 | A/G | 08p | A | 0           | 0           |
| rs2280896 | MYOM2           | A/T | 08p | T | 0           | 0           |
| rs2289593 | DPYSL2          | C/T | 08p | T | 0           | 0           |
| rs2442513 | MCPH1           | A/C | 08p | C | 0.026785714 | 0.031531532 |
| rs2719323 | LOC137107       | A/G | 08p | A | 0.004464286 | 0.004464286 |
| rs2738047 | DEFB1           | A/G | 08p | A | 0           | 0           |
| rs2911690 | UBXD6           | A/G | 08p | G | 0           | 0           |
| rs3087414 | WRN             | C/T | 08p | T | 0           | 0.004464286 |
| rs3213606 | ASAH1           | C/T | 08p | C | 0           | 0           |
| rs370429  | PCM1            | A/G | 08p | A | 0.022522522 | 0.077272727 |
| rs3735726 | FBXO16          | A/G | 08p | A | 0.004464286 | 0           |
| rs3735774 | NRG1            | A/G | 08p | A | 0           | 0           |
| rs3736013 | XKR6            | A/G | 08p | G | 0.008928571 | 0           |
| rs3736281 | ADAM7           | C/T | 08p | C | 0           | 0           |
| rs3739308 | C8orf79         | A/G | 08p | G | 0.004464286 | 0.004464286 |
| rs3748140 | PPP1R3B         | A/G | 08p | A | 0.018018018 | 0.004587156 |
| rs3779727 | BIN3            | A/G | 08p | G | 0           | 0.008928571 |
| rs3814955 |                 | C/G | 08p | C | 0.004504504 | 0           |
| rs429433  | MFHAS1          | C/T | 08p | T | 0.044642857 | 0.027027027 |
| rs4986783 | NAT1            | G/T | 08p | G | 0.027027027 | 0.013392857 |
| rs4986996 | NAT2            | A/G | 08p | A | 0           | 0           |
| rs4987195 | NAT1            | C/T | 08p | T | 0           | 0           |
| rs4987237 | WRN             | A/G | 08p | G | 0           | 0           |
| rs6474226 | C8orf4          | A/G | 08p | G | 0           | 0           |
| rs6474440 | POTE8           | A/C | 08p | A | 0           | 0           |
| rs6601495 | RP1L1           | C/G | 08p | C | 0.004464286 | 0.004464286 |
| rs6980553 | TACC1           | C/T | 08p | C | 0           | 0           |
| rs6980829 | ADAM7           | C/T | 08p | C | 0           | 0.004464286 |
| rs6995799 | CSMD1           | C/G | 08p | G | 0.004504505 | 0.013636364 |
| rs6998705 | C8orf80         | C/G | 08p | C | 0           | 0           |
| rs7001647 | ADAM28          | A/G | 08p | G | 0           | 0           |
| rs7002131 |                 | C/T | 08p | T | 0.028571429 | 0.02293578  |
| rs7006422 |                 | C/T | 08p | T | 0.004464286 | 0           |
| rs7007084 | ADAMDEC1        | C/T | 08p | C | 0           | 0.004464286 |
| rs7014851 | HR              | C/T | 08p | C | 0.008928571 | 0.03125     |

|            |          |     |     |   |             |             |
|------------|----------|-----|-----|---|-------------|-------------|
| rs7388581  | MTMR7    | C/G | 08p | G | 0.009090909 | 0.018018018 |
| rs7814768  | ADAM28   | A/G | 08p | G | 0           | 0.004464286 |
| rs8190955  | GSR      | C/T | 08p | T | 0.004464286 | 0.009009009 |
| rs8191612  | NEIL2    | C/T | 08p | T | 0           | 0           |
| rs8191664  | NEIL2    | G/T | 08p | T | 0.017857143 | 0.017857143 |
| rs9314282  | ADAM28   | G/T | 08p | T | 0           | 0           |
| rs9331940  | CLU      | C/T | 08p | T | 0           | 0           |
| rs9694591  |          | A/C | 08p | A | 0           | 0           |
| rs10091530 | TG       | A/G | 08q | G | 0.004504505 | 0.004504505 |
| rs10091928 |          | C/G | 08q | C | 0           | 0           |
| rs10107774 | ZNF572   | A/T | 08q | T | 0.038095238 | 0.046875    |
| rs10504829 | CNBD1    | A/G | 08q | A | 0           | 0           |
| rs10875414 | FLJ45872 | C/G | 08q | C | 0           | 0           |
| rs11466004 | LY96     | C/T | 08q | T | 0.009009009 | 0.013392857 |
| rs11998459 | PENK     | G/T | 08q | T | 0.004504505 | 0           |
| rs1445404  | EYA1     | C/G | 08q | C | 0.004464286 | 0           |
| rs180222   | TG       | C/G | 08q | G | 0.027027027 | 0.022522523 |
| rs1898465  | RALYL    | G/T | 08q | T | 0.031531532 | 0.022321429 |
| rs2193430  | CSMD3    | C/G | 08q | C | 0           | 0           |
| rs2228063  | CA2      | A/G | 08q | G | 0           | 0           |
| rs2229843  | TG       | G/T | 08q | T | 0           | 0           |
| rs2231522  | CHRAC1   | A/G | 08q | A | 0           | 0           |
| rs2256158  | BAALC    | C/G | 08q | C | 0           | 0           |
| rs2270877  | KIAA0143 | C/G | 08q | G | 0           | 0           |
| rs2289886  | ENPP2    | C/T | 08q | C | 0           | 0           |
| rs2290839  |          | A/G | 08q | A | 0           | 0           |
| rs2303460  | ST18     | C/T | 08q | T | 0           | 0           |
| rs2306131  | POP1     | G/T | 08q | G | 0           | 0           |
| rs3026268  | NBN      | C/T | 08q | C | 0           | 0           |
| rs3136422  | RAD54B   | A/G | 08q | A | 0           | 0           |
| rs3736038  | LRRCC1   | A/G | 08q | G | 0.039325843 | 0.042553192 |
| rs3739335  | RRS1     | A/G | 08q | G | 0.008928571 | 0.004504505 |
| rs3779617  | GRHL2    | A/G | 08q | A | 0.004464286 | 0.004464286 |
| rs4278157  | PRKDC    | C/T | 08q | T | 0.049107143 | 0.036036036 |
| rs4443674  |          | G/T | 08q | T | 0           | 0.004464286 |
| rs4734653  | KLF10    | A/G | 08q | A | 0           | 0.004504504 |
| rs4874084  | ZNF623   | A/G | 08q | A | 0           | 0           |

|            |               |     |     |   |             |             |
|------------|---------------|-----|-----|---|-------------|-------------|
| rs6405     | CYP11B1       | A/G | 08q | A | 0           | 0           |
| rs6472285  | SGK3          | A/G | 08q | G | 0.036363636 | 0.035714286 |
| rs6472673  |               | C/T | 08q | C | 0           | 0.004464286 |
| rs6472812  | LY96          | A/G | 08q | A | 0.035714286 | 0.054054054 |
| rs6987984  | LOC442388     | C/T | 08q | T | 0.004464286 | 0           |
| rs6995255  | CCDC26        | G/T | 08q | G | 0           | 0           |
| rs6995610  | CTHRC1        | A/G | 08q | G | 0           | 0           |
| rs7001998  |               | A/G | 08q | G | 0           | 0           |
| rs7013480  |               | C/G | 08q | C | 0           | 0           |
| rs7463016  |               | A/C | 08q | A | 0           | 0           |
| rs769420   | NBN           | A/G | 08q | A | 0           | 0           |
| rs7830743  | PRKDC         | A/G | 08q | G | 0.04954955  | 0.089285714 |
| rs7833870  | VPS13B        | C/T | 08q | C | 0.024271845 | 0.069148936 |
| rs7835798  | PTDSS1        | A/C | 08q | A | 0           | 0           |
| rs7836580  |               | A/G | 08q | A | 0.004504504 | 0.004464286 |
| rs7841823  | RPS26P10      | G/T | 08q | G | 0           | 0           |
| rs8178033  | PRKDC         | C/G | 08q | G | 0.004504505 | 0           |
| rs8178040  | PRKDC         | A/G | 08q | G | 0           | 0           |
| rs8178070  | PRKDC         | A/G | 08q | G | 0.004464286 | 0           |
| rs8178216  | PRKDC         | C/T | 08q | T | 0.004545455 | 0.009009009 |
| rs9314385  |               | A/G | 08q | A | 0           | 0           |
| rs10441706 | KIAA1797      | A/G | 09p | A | 0.004464286 | 0           |
| rs1046658  | RECK          | C/T | 09p | T | 0           | 0           |
| rs1063273  | PRSS3         | C/G | 09p | G | 0           | 0           |
| rs10812505 | IFT74         | A/G | 09p | G | 0.044642857 | 0.040540541 |
| rs10959454 |               | C/T | 09p | C | 0.004464286 | 0           |
| rs10959455 |               | A/T | 09p | A | 0.009174312 | 0.004504504 |
| rs10959456 |               | A/G | 09p | A | 0.049107143 | 0.058558559 |
| rs10964136 | ASAH3L        | C/T | 09p | T | 0.013392857 | 0.03125     |
| rs10965002 |               | C/T | 09p | T | 0.044642857 | 0.044642857 |
| rs10968457 | KIAA0020      | C/T | 09p | T | 0.032110092 | 0.054545455 |
| rs10974657 | C9orf68       | C/T | 09p | C | 0.04054054  | 0.03125     |
| rs10977171 | PTPRD         | C/G | 09p | C | 0.049107143 | 0.036363636 |
| rs10978001 | DMRT3         | A/G | 09p | A | 0.004761905 | 0.009708738 |
| rs1125488  | IFNE1         | A/C | 09p | C | 0.04954955  | 0.05        |
| rs11575594 | IL11RA, CCL27 | C/T | 09p | C | 0           | 0           |
| rs12342214 | C9orf82       | C/T | 09p | T | 0           | 0           |

|            |               |     |     |   |             |             |
|------------|---------------|-----|-----|---|-------------|-------------|
| rs1334811  | TEK           | A/G | 09p | A | 0.04054054  | 0.049107143 |
| rs1417290  | JMJD2C        | A/G | 09p | G | 0.047619048 | 0.034313726 |
| rs1476178  |               | A/G | 09p | A | 0           | 0           |
| rs2020050  | RLN2          | A/C | 09p | A | 0           | 0           |
| rs2039381  | IFNE1         | C/T | 09p | T | 0           | 0.008928571 |
| rs2149554  | INSL6         | A/G | 09p | G | 0.004464286 | 0           |
| rs2233559  | OR2S2         | A/G | 09p | A | 0           | 0           |
| rs2270891  | KIAA0020      | A/C | 09p | A | 0.040178571 | 0.054054054 |
| rs2296556  | FRMPD1        | C/T | 09p | T | 0.018018018 | 0.017857143 |
| rs2799124  |               | A/T | 09p | T | 0.044554455 | 0.038834952 |
| rs3087653  | SNAPC3        | A/C | 09p | C | 0.027027027 | 0.058558559 |
| rs3739714  | BNC2          | A/G | 09p | G | 0           | 0           |
| rs3739871  | C9orf131      | A/G | 09p | A | 0           | 0           |
| rs3780390  | C9orf46       | C/T | 09p | T | 0           | 0           |
| rs443563   | C9orf93       | A/T | 09p | A | 0.049549549 | 0.049549549 |
| rs4879781  | KIAA1161      | C/G | 09p | G | 0.009090909 | 0.009090909 |
| rs4986939  | FANCG         | A/G | 09p | A | 0           | 0           |
| rs4986940  | FANCG         | C/T | 09p | T | 0           | 0.004464286 |
| rs6149     | VLDLR         | A/G | 09p | A | 0.013513513 | 0           |
| rs6475322  | DENND4C       | A/C | 09p | C | 0           | 0           |
| rs700785   | IFNK, MOBKL2B | C/T | 09p | T | 0.004464286 | 0.004464286 |
| rs776755   | ADAMTSL1      | A/G | 09p | A | 0.05        | 0.044642857 |
| rs781103   |               | A/G | 09p | A | 0           | 0           |
| rs7854303  | PDCD1LG2      | C/T | 09p | T | 0           | 0           |
| rs7854621  | DMRT3         | A/C | 09p | C | 0           | 0.004464286 |
| rs7863488  | POLR1E        | C/G | 09p | C | 0           | 0           |
| rs7867180  | POLR1E        | A/G | 09p | A | 0.004504504 | 0.004545454 |
| rs7875872  | KIAA1797      | C/G | 09p | C | 0           | 0           |
| rs884132   | JAK2          | C/T | 09p | T | 0           | 0           |
| rs991850   |               | C/T | 09p | C | 0           | 0           |
| rs10114908 | WNK2          | G/T | 09q | T | 0           | 0           |
| rs10217494 | ZNF510        | C/T | 09q | T | 0           | 0.004464286 |
| rs10481712 |               | C/T | 09q | T | 0.008928571 | 0.008928571 |
| rs10521092 | IKBKAP        | A/T | 09q | T | 0           | 0.009090909 |
| rs1052867  | INVS          | A/T | 09q | A | 0           | 0           |
| rs1058518  |               | G/T | 09q | G | 0           | 0.004464286 |
| rs10739712 | SLC25A25      | A/G | 09q | A | 0.004504504 | 0           |

|            |                     |     |     |   |             |             |
|------------|---------------------|-----|-----|---|-------------|-------------|
| rs10760381 | RPL35               | C/G | 09q | C | 0           | 0           |
| rs10821494 |                     | A/G | 09q | A | 0.025773196 | 0.02247191  |
| rs10867333 |                     | C/T | 09q | T | 0.031531532 | 0.028846154 |
| rs10895    | COL5A1              | C/T | 09q | T | 0.040178571 | 0.017857143 |
| rs10979599 | IKBKAP              | G/T | 09q | T | 0.004464286 | 0.004504505 |
| rs10980419 | SVEP1               | C/T | 09q | T | 0.022321429 | 0.026785714 |
| rs10981009 | C9orf84             | A/G | 09q | A | 0           | 0           |
| rs10981047 | C9orf84             | C/G | 09q | C | 0.004545454 | 0.013392857 |
| rs10986353 | GPR144              | A/G | 09q | A | 0           | 0           |
| rs10988532 | COL15A1             | C/T | 09q | T | 0           | 0           |
| rs10988694 | COL15A1             | A/G | 09q | A | 0.04245283  | 0.056603774 |
| rs11103196 | CAMSAP1             | A/C | 09q | A | 0.017857143 | 0.013392857 |
| rs11143384 | TMC1                | C/T | 09q | T | 0.017857143 | 0.026785714 |
| rs11145226 | LOC645225           | A/G | 09q | A | 0.015957447 | 0.028735632 |
| rs11145227 | LOC645225           | C/T | 09q | T | 0.008928571 | 0.008928571 |
| rs11243731 | SETX                | A/G | 09q | A | 0           | 0           |
| rs11244366 | PPAPDC3             | C/G | 09q | G | 0.008928571 | 0.004504505 |
| rs11568418 | SLC28A3             | A/G | 09q | G | 0           | 0           |
| rs12115342 | FLJ43950, LOC729294 | A/G | 09q | A | 0           | 0           |
| rs12352982 | SETX                | A/G | 09q | A | 0           | 0           |
| rs1265891  | AKNA                | C/T | 09q | C | 0           | 0.008928571 |
| rs1322254  | C9orf84             | G/T | 09q | T | 0.008928571 | 0           |
| rs15233    | HSPA5, RABEPK       | G/T | 09q | T | 0           | 0           |
| rs170462   |                     | C/T | 09q | C | 0.026785714 | 0.022321429 |
| rs1800956  | ENG                 | C/G | 09q | C | 0           | 0           |
| rs2066479  | HSD17B3             | A/G | 09q | A | 0.035714286 | 0.0625      |
| rs2066480  | HSD17B3             | A/G | 09q | A | 0.013392857 | 0.013392857 |
| rs2066718  | ABCA1               | A/G | 09q | A | 0.022321429 | 0.040178571 |
| rs2072394  | TRUB2               | C/G | 09q | C | 0           | 0           |
| rs2271877  | C9orf5              | C/T | 09q | T | 0.008928571 | 0           |
| rs2274750  | TNC                 | A/G | 09q | A | 0.035714286 | 0.026785714 |
| rs2274970  | RPL35               | C/T | 09q | T | 0.008928571 | 0.004464286 |
| rs2289651  | ZNF510              | A/G | 09q | G | 0.008928571 | 0           |
| rs2295862  | OSTF1               | A/G | 09q | G | 0           | 0           |
| rs2296949  | POMT1               | A/G | 09q | A | 0.035714286 | 0.026785714 |
| rs2297002  | GOLM1               | C/T | 09q | C | 0.004464286 | 0.013513513 |
| rs2297085  | FBP1                | A/T | 09q | T | 0           | 0           |



|           |               |     |     |   |             |             |
|-----------|---------------|-----|-----|---|-------------|-------------|
| rs2297089 | TMEM2         | C/T | 09q | T | 0.049107143 | 0.004504505 |
| rs2297483 | MRRF          | C/T | 09q | C | 0.004464286 | 0           |
| rs2298050 | CYLC2         | A/G | 09q | G | 0           | 0.004464286 |
| rs2306093 | KIAA1529      | A/G | 09q | A | 0           | 0           |
| rs237620  | OR1L1         | C/G | 09q | G | 0           | 0.008928571 |
| rs2596699 | RC3H2         | A/T | 09q | T | 0.004464286 | 0.004464286 |
| rs2636889 | ORM2          | C/T | 09q | C | 0           | 0           |
| rs2722863 |               | G/T | 09q | T | 0.041284404 | 0.054545455 |
| rs2770144 | TLR4          | A/C | 09q | C | 0           | 0           |
| rs2770145 | TLR4          | A/C | 09q | C | 0           | 0           |
| rs2778284 | KIF27         | A/T | 09q | A | 0.009433962 | 0.013636364 |
| rs3000573 | GPR116        | C/G | 09q | C | 0           | 0.004464286 |
| rs3176750 | XPA           | C/G | 09q | G | 0           | 0           |
| rs3739721 | ALDOB         | C/G | 09q | G | 0           | 0           |
| rs3739840 | LOC169834     | A/T | 09q | T | 0           | 0           |
| rs3739922 | SETX          | G/T | 09q | G | 0.044642857 | 0.027027027 |
| rs3747512 | KIAA1529      | A/G | 09q | A | 0.004504504 | 0           |
| rs3747834 | TRIM32, ASTN2 | C/G | 09q | G | 0           | 0           |
| rs3748195 | KIAA0649      | A/G | 09q | A | 0.013392857 | 0.008928571 |
| rs3750378 | PNPLA7        | C/G | 09q | G | 0.004504505 | 0           |
| rs3763636 | CYLC2         | A/C | 09q | A | 0           | 0.004464286 |
| rs3780548 | ZNF510        | A/G | 09q | G | 0.00462963  | 0.004672897 |
| rs3802384 | FGD3          | A/G | 09q | A | 0.045045045 | 0.040178571 |
| rs3824534 |               | C/T | 09q | T | 0.013392857 | 0.013392857 |
| rs3842789 | PTGS1         | A/G | 09q | A | 0           | 0           |
| rs4066676 |               | C/T | 09q | T | 0.009009009 | 0           |
| rs4149312 |               | A/G | 09q | A | 0.049549549 | 0.067567568 |
| rs4305994 |               | C/T | 09q | T | 0           | 0.009090909 |
| rs4645656 | ZNF782        | C/T | 09q | T | 0.017857143 | 0.009174312 |
| rs4836822 | CDK5RAP2      | C/G | 09q | C | 0.044642857 | 0.05        |
| rs4987233 | TLR4          | A/G | 09q | A | 0           | 0           |
| rs5030719 | TLR4          | G/T | 09q | T | 0           | 0.013513514 |
| rs583134  | GOLGA1        | A/C | 09q | A | 0.004464286 | 0           |
| rs6479259 | OR13C5        | C/T | 09q | C | 0.008928571 | 0.004545454 |
| rs656106  | GCNT1         | G/T | 09q | T | 0           | 0           |
| rs70157   | OR1L1         | A/G | 09q | G | 0.004464286 | 0.004464286 |
| rs7018553 | OR13F1        | C/T | 09q | C | 0           | 0           |

|            |             |     |     |   |             |             |
|------------|-------------|-----|-----|---|-------------|-------------|
| rs7030366  | DGAT2L7     | C/T | 09q | T | 0           | 0.009009009 |
| rs7030983  |             | A/G | 09q | G | 0.004464286 | 0           |
| rs7864373  | SEC16A      | C/G | 09q | G | 0           | 0           |
| rs7870376  | ZNF782      | C/G | 09q | G | 0.011235955 | 0.005319149 |
| rs790287   |             | C/G | 09q | C | 0.027027027 | 0.022321429 |
| rs8176739  | ABO         | C/T | 09q | T | 0.022321429 | 0.03125     |
| rs818711   | BSPRY       | C/G | 09q | C | 0.049107143 | 0.058558559 |
| rs838827   | IKBKAP      | C/T | 09q | T | 0.040540541 | 0.058558559 |
| rs8999     | TTF1        | G/T | 09q | T | 0.044642857 | 0.058035714 |
| rs921122   | NOL8        | C/T | 09q | T | 0.026785714 | 0.066964286 |
| rs10242    | NMT2, RPP38 | C/T | 10p | C | 0.017857143 | 0.022727273 |
| rs10458699 |             | A/C | 10p | A | 0.03125     | 0.0625      |
| rs10736965 |             | A/G | 10p | A | 0.043010753 | 0.042105263 |
| rs10740829 |             | C/G | 10p | G | 0.004504505 | 0           |
| rs11011376 |             | C/T | 10p | C | 0.008928571 | 0.022321429 |
| rs11011935 | SLC39A12    | C/T | 10p | C | 0           | 0.004504504 |
| rs11013233 | ARMC3       | C/T | 10p | C | 0.03125     | 0.053571429 |
| rs11015859 | RAB18       | A/G | 10p | A | 0           | 0.004464286 |
| rs11258194 |             | A/T | 10p | A | 0.040178571 | 0.053571429 |
| rs11258565 | FRMD4A      | C/G | 10p | G | 0           | 0           |
| rs11259332 | FAM107B     | A/G | 10p | A | 0.008928571 | 0.004504504 |
| rs11595555 | CX40.1      | G/T | 10p | T | 0.03125     | 0.017857143 |
| rs1247696  | SVIL        | C/T | 10p | C | 0.004464286 | 0.017857143 |
| rs12572862 | ANKRD26     | C/G | 10p | G | 0           | 0           |
| rs1638630  | PTCHD3      | C/T | 10p | T | 0.03125     | 0.026785714 |
| rs1755403  | YME1L1      | C/G | 10p | G | 0           | 0           |
| rs1762526  | C10orf68    | C/T | 10p | T | 0.008928571 | 0           |
| rs2271460  | CUBN        | A/C | 10p | C | 0           | 0           |
| rs2279218  | PITRM1      | A/G | 10p | A | 0           | 0           |
| rs2296136  | ANKRD16     | C/G | 10p | C | 0.022522522 | 0.022321429 |
| rs2298033  | ITGA8       | C/T | 10p | T | 0.004464286 | 0.026785714 |
| rs2306236  | ABI1        | C/G | 10p | G | 0           | 0           |
| rs2356590  | CUBN        | G/T | 10p | T | 0.013513514 | 0.009009009 |
| rs2478476  | LOC340900   | A/T | 10p | T | 0           | 0.008928571 |
| rs2669142  | C10orf18    | A/G | 10p | A | 0.008928571 | 0.03125     |
| rs2796835  | CUBN        | C/G | 10p | G | 0.022222222 | 0.015151515 |
| rs2839673  | GAD2        | A/G | 10p | A | 0           | 0.013513513 |

|            |                      |     |     |   |             |             |
|------------|----------------------|-----|-----|---|-------------|-------------|
| rs3737184  | ARMC4                | A/C | 10p | A | 0.013513513 | 0           |
| rs3737203  |                      | C/T | 10p | T | 0           | 0           |
| rs3737274  | MYO3A                | C/T | 10p | T | 0           | 0           |
| rs3740212  | SFMBT2               | C/G | 10p | C | 0.004464286 | 0.004464286 |
| rs3793733  | ADARB2               | A/G | 10p | A | 0.004504504 | 0.013392857 |
| rs3814171  | NMT2, RPP38          | C/T | 10p | C | 0.022321429 | 0.017857143 |
| rs3814193  |                      | A/G | 10p | A | 0.004464286 | 0           |
| rs4448627  | C10orf68             | C/G | 10p | G | 0           | 0           |
| rs4748728  | NEBL                 | A/T | 10p | T | 0.013392857 | 0.026785714 |
| rs4750090  | ECHDC3               | A/G | 10p | G | 0           | 0.013392857 |
| rs530567   |                      | C/T | 10p | T | 0           | 0           |
| rs7075296  | ITIH2                | A/G | 10p | A | 0           | 0           |
| rs7100661  | C10orf112            | C/T | 10p | C | 0           | 0.008928571 |
| rs7127     | WAC                  | A/T | 10p | A | 0           | 0           |
| rs7895372  | ITGA8                | C/G | 10p | G | 0.004464286 | 0           |
| rs7900687  | C10orf18             | A/G | 10p | G | 0           | 0           |
| rs7917566  | KIAA1462             | C/T | 10p | T | 0.041666667 | 0.048387097 |
| rs9333174  | ITGA8                | A/G | 10p | A | 0.004504504 | 0.009523809 |
| rs9333241  | ITGA8                | A/G | 10p | G | 0           | 0           |
| rs996592   |                      | A/T | 10p | A | 0           | 0.004545454 |
| rs10510108 | BTBD16               | A/G | 10q | G | 0.035714286 | 0.009009009 |
| rs10510114 | LOC731938            | C/T | 10q | T | 0           | 0           |
| rs1057909  | CYP2C9               | A/G | 10q | G | 0.004464286 | 0.008928571 |
| rs1061954  | COL13A1              | C/G | 10q | G | 0           | 0           |
| rs1062398  | ACTA2                | A/C | 10q | C | 0           | 0           |
| rs10732829 | STAMBPL1             | G/T | 10q | G | 0.008928571 | 0.004504504 |
| rs10885929 | PNLIPRP3             | C/T | 10q | T | 0.027272727 | 0.013392857 |
| rs10902963 |                      | C/T | 10q | T | 0.022321429 | 0.008928571 |
| rs10995569 | REEP3                | A/G | 10q | G | 0           | 0           |
| rs10999334 | NODAL                | C/T | 10q | T | 0           | 0.004464286 |
| rs11000217 | ASCC1                | C/G | 10q | C | 0.013513513 | 0.013392857 |
| rs11006655 | SLC16A9              | A/C | 10q | C | 0           | 0           |
| rs11017081 | LOC387723, LOC651940 | C/T | 10q | T | 0           | 0           |
| rs11101143 | ERCC6, PGBD3         | C/G | 10q | C | 0.004464286 | 0           |
| rs11101642 | KNDC1                | A/G | 10q | A | 0.018867924 | 0.067567568 |
| rs11101677 | TUBGCP2              | C/T | 10q | T | 0.031531532 | 0.008928571 |
| rs11101682 | TUBGCP2              | A/G | 10q | G | 0           | 0           |

|            |               |     |     |   |             |             |
|------------|---------------|-----|-----|---|-------------|-------------|
| rs11101822 | SYCE1         | C/G | 10q | C | 0.004504504 | 0           |
| rs11146376 | C10orf91      | A/G | 10q | G | 0           | 0.004504505 |
| rs11185863 | MPHOSPH1      | C/G | 10q | C | 0.004464286 | 0.004464286 |
| rs11187393 | FER1L3        | A/G | 10q | A | 0.035714286 | 0.066964286 |
| rs11187892 | NOC3L         | A/C | 10q | A | 0           | 0           |
| rs11192966 | SORCS1        | C/T | 10q | C | 0.004504504 | 0.008928571 |
| rs11196530 | DCLRE1A       | A/T | 10q | A | 0.004464286 | 0.008928571 |
| rs11197744 | PNLIPRP1      | A/G | 10q | G | 0.040178571 | 0.03125     |
| rs1128865  | ZNF239        | C/G | 10q | G | 0.004464286 | 0           |
| rs11509438 | GSTO1, GSTO2  | A/G | 10q | A | 0.040178571 | 0.022321429 |
| rs11572103 | CYP2C8        | A/T | 10q | T | 0           | 0.014018692 |
| rs11593747 | CCDC6         | C/T | 10q | T | 0           | 0           |
| rs11596653 | MYPN          | C/T | 10q | C | 0.013392857 | 0.022321429 |
| rs11813863 |               | C/G | 10q | G | 0           | 0           |
| rs11817253 |               | A/G | 10q | G | 0.022522523 | 0.022321429 |
| rs12247136 | KCNK18        | A/G | 10q | A | 0           | 0           |
| rs12265409 |               | C/G | 10q | C | 0.004464286 | 0           |
| rs1417635  | RBM20         | C/G | 10q | C | 0           | 0           |
| rs1539587  | NRAP          | C/T | 10q | T | 0.040178571 | 0.026785714 |
| rs15950    | SCD           | G/T | 10q | G | 0           | 0           |
| rs1613448  | PRLHR         | C/T | 10q | T | 0           | 0           |
| rs1952061  | C10orf28      | C/T | 10q | T | 0           | 0           |
| rs1953758  | ATRNL1        | A/G | 10q | G | 0.045045045 | 0.017857143 |
| rs2020893  | MGMT          | A/G | 10q | A | 0           | 0           |
| rs2116286  | PNLIPRP3      | A/T | 10q | T | 0           | 0           |
| rs2166631  | CDH23         | A/G | 10q | A | 0.019417476 | 0.009523809 |
| rs2227309  | CASP7         | A/G | 10q | A | 0.004901961 | 0.019047619 |
| rs2227310  | CASP7         | C/G | 10q | G | 0           | 0           |
| rs2231785  | STAMBPL1      | C/T | 10q | T | 0.013513514 | 0.004545455 |
| rs2256871  | CYP2C9        | C/T | 10q | C | 0           | 0.004464286 |
| rs2270439  | BTRC          | A/C | 10q | A | 0           | 0           |
| rs2271694  | H2AFY2, AIFM2 | A/G | 10q | A | 0.009009009 | 0.018018018 |
| rs2273903  | HNRPH3, RUFY2 | A/G | 10q | G | 0           | 0           |
| rs2282238  | DUSP5         | C/G | 10q | G | 0.009009009 | 0           |
| rs2286734  | NRAP          | G/T | 10q | T | 0           | 0           |
| rs2295771  | SEC31B        | C/T | 10q | T | 0           | 0           |
| rs2295878  | TACC2         | A/G | 10q | A | 0           | 0.004587156 |

|           |              |     |     |   |             |             |
|-----------|--------------|-----|-----|---|-------------|-------------|
| rs2304804 | ANKRD22      | G/T | 10q | G | 0.04054054  | 0.04054054  |
| rs2305204 | PNLIPRP1     | C/G | 10q | C | 0.036036036 | 0.089285714 |
| rs2306265 | GRID1        | C/T | 10q | T | 0.013392857 | 0.004464286 |
| rs2306322 | SPOCK2       | C/T | 10q | T | 0           | 0           |
| rs3218611 | FAS          | C/T | 10q | T | 0           | 0           |
| rs3218614 | FAS          | C/T | 10q | T | 0           | 0           |
| rs3218619 | FAS          | A/G | 10q | A | 0           | 0           |
| rs363315  | KCNK18       | C/T | 10q | C | 0.022321429 | 0.027522936 |
| rs363360  | KCNK18       | C/T | 10q | T | 0           | 0           |
| rs3740093 | ZNF22        | C/T | 10q | C | 0.045045045 | 0.072072072 |
| rs3740321 | MYST4        | C/T | 10q | T | 0.013392857 | 0.017857143 |
| rs3747879 | PAOX         | A/G | 10q | A | 0           | 0           |
| rs3748233 | PIK3AP1      | A/G | 10q | A | 0           | 0           |
| rs3750575 | ANXA7        | A/G | 10q | A | 0           | 0           |
| rs3750819 | FGFR2        | C/G | 10q | G | 0           | 0           |
| rs3758390 | MPHOSPH1     | A/G | 10q | G | 0           | 0           |
| rs3764990 |              | C/T | 10q | T | 0.045045045 | 0.058035714 |
| rs3765571 | ALDH18A1     | G/T | 10q | T | 0.013513514 | 0.008928571 |
| rs3793744 | ENTPD1       | C/T | 10q | T | 0.004464286 | 0           |
| rs3829856 | C10orf12     | A/C | 10q | C | 0.040909091 | 0.098214286 |
| rs4253047 | ERCC6, PGBD3 | A/G | 10q | A | 0.032967033 | 0.07368421  |
| rs4253199 |              | C/T | 10q | T | 0           | 0           |
| rs431898  | EIF3A        | C/G | 10q | C | 0           | 0           |
| rs4838544 | CHAT         | A/G | 10q | G | 0           | 0           |
| rs7073433 | TACC2        | C/T | 10q | T | 0           | 0           |
| rs7080536 | HABP2, NRAP  | A/G | 10q | A | 0.045045045 | 0.036036036 |
| rs7080681 | ABCC2        | A/G | 10q | A | 0           | 0           |
| rs7080916 | CEP55        | A/G | 10q | A | 0           | 0.004464286 |
| rs7081726 | PDCD4        | A/G | 10q | A | 0.044642857 | 0.045045045 |
| rs7083622 | MKI67        | G/T | 10q | T | 0           | 0           |
| rs7089948 | PPP1R3C      | A/C | 10q | A | 0           | 0           |
| rs7904231 |              | A/G | 10q | G | 0           | 0.004587156 |
| rs7911125 |              | A/G | 10q | A | 0           | 0           |
| rs7911491 |              | C/T | 10q | T | 0           | 0           |
| rs7912706 | ANKRD22      | A/C | 10q | A | 0.013888889 | 0           |
| rs7914982 | ZNF33B       | C/T | 10q | C | 0.004464286 | 0           |
| rs805698  | COL17A1      | C/T | 10q | C | 0.008928571 | 0.004464286 |

|            |                     |     |     |   |             |             |
|------------|---------------------|-----|-----|---|-------------|-------------|
| rs8178989  | CHAT                | C/G | 10q | C | 0           | 0.008928571 |
| rs8181357  | SYCE1               | A/C | 10q | A | 0           | 0.009009009 |
| rs8187692  | ABCC2               | G/T | 10q | T | 0.004464286 | 0           |
| rs8187700  |                     | C/T | 10q | T | 0           | 0           |
| rs8187730  | CHAT, SLC18A3       | A/C | 10q | C | 0           | 0           |
| rs967185   | EIF3A               | C/T | 10q | T | 0           | 0           |
| rs1030723  | OR51F1              | C/T | 11p | T | 0           | 0           |
| rs10450603 | OR51I2              | C/T | 11p | T | 0           | 0           |
| rs1048218  | BDNF                | G/T | 11p | T | 0.004504505 | 0           |
| rs1048221  | BDNF                | G/T | 11p | T | 0           | 0           |
| rs10751676 | MUC6                | G/T | 11p | G | 0           | 0           |
| rs10832767 |                     | A/G | 11p | G | 0.03125     | 0.0625      |
| rs10836954 | OR51G1              | A/G | 11p | A | 0.03125     | 0.078703704 |
| rs10839564 | HPX                 | C/T | 11p | T | 0           | 0.004504505 |
| rs10839849 | OVCH2               | A/G | 11p | G | 0.05        | 0.098214286 |
| rs10902269 | MUC6                | G/T | 11p | T | 0           | 0           |
| rs11024269 | DKFZp686O24166      | A/C | 11p | A | 0           | 0           |
| rs11024773 | PTPN5               | C/T | 11p | C | 0           | 0           |
| rs11026002 | C11orf36            | A/C | 11p | C | 0.022522523 | 0.009009009 |
| rs11031357 | DCDC1               | C/T | 11p | C | 0.004464286 | 0           |
| rs11031390 | LOC390031, tcag7.51 | G/T | 11p | T | 0           | 0           |
| rs11031961 | OR52B4              | A/G | 11p | A | 0           | 0.004504504 |
| rs11032229 | HIPK3               | A/G | 11p | A | 0           | 0.004464286 |
| rs11033793 | OR51F1              | C/T | 11p | C | 0           | 0           |
| rs11033801 | OR51F1              | A/G | 11p | G | 0.022522523 | 0.04954955  |
| rs11034596 | OR51A7              | A/G | 11p | A | 0.042056075 | 0.077669903 |
| rs11038988 | CKAP5               | C/T | 11p | C | 0           | 0           |
| rs11039036 | OR52N1              | A/C | 11p | A | 0           | 0           |
| rs11039302 | KBTBD4              | C/T | 11p | T | 0           | 0           |
| rs11039554 | PTPRJ               | C/T | 11p | C | 0           | 0           |
| rs11041107 | ZNF215              | A/G | 11p | G | 0           | 0           |
| rs11041525 | CYB5R2              | G/T | 11p | G | 0.013513513 | 0.004464286 |
| rs1136853  | IFITM3              | A/C | 11p | A | 0.045454545 | 0.044642857 |
| rs11821519 |                     | A/C | 11p | C | 0.004464286 | 0.008928571 |
| rs12223282 | UBQLNL              | C/G | 11p | C | 0.017857143 | 0.058558559 |
| rs12993    | IGF2                | G/T | 11p | T | 0           | 0           |
| rs1503193  | OR4X1               | C/T | 11p | T | 0           | 0           |

|           |                                          |     |     |   |             |             |
|-----------|------------------------------------------|-----|-----|---|-------------|-------------|
| rs1734491 | SIRT3                                    | G/T | 11p | T | 0           | 0           |
| rs1910838 |                                          | C/G | 11p | C | 0           | 0.004464286 |
| rs1965208 | OR2D2                                    | A/G | 11p | A | 0.009615385 | 0.013888889 |
| rs2010519 | SLC39A13                                 | A/G | 11p | A | 0           | 0           |
| rs2018795 | PHACS                                    | C/G | 11p | G | 0           | 0.004545455 |
| rs2162044 | MRVI1                                    | C/T | 11p | C | 0.020618557 | 0.014423077 |
| rs2234283 | TSSC4, TRPM5                             | A/C | 11p | A | 0.017857143 | 0.008928571 |
| rs2234454 | UBQLN3                                   | A/G | 11p | A | 0           | 0           |
| rs2239729 | ZNF215                                   | C/T | 11p | C | 0           | 0           |
| rs2270515 | MICAL2                                   | A/G | 11p | A | 0           | 0           |
| rs2271815 | ALKBH3                                   | C/T | 11p | T | 0.004464286 | 0.017857143 |
| rs2278169 |                                          | A/G | 11p | A | 0           | 0           |
| rs2291843 | TRIM22                                   | A/G | 11p | G | 0           | 0           |
| rs2292290 | TMEM16C, MUC15                           | A/G | 11p | G | 0.004464286 | 0           |
| rs2306727 | MICAL2                                   | A/G | 11p | G | 0           | 0.008928571 |
| rs2445179 | MRGPRX4                                  | A/G | 11p | A | 0           | 0.004464286 |
| rs2473928 | ABTB2                                    | A/G | 11p | G | 0           | 0           |
| rs2499953 | MMP26                                    | A/G | 11p | G | 0.026785714 | 0.035714286 |
| rs2555152 | C11orf47                                 | C/T | 11p | T | 0           | 0           |
| rs2568023 | C11orf16                                 | C/T | 11p | C | 0.013392857 | 0           |
| rs2659875 | DCHS1                                    | C/T | 11p | T | 0           | 0           |
| rs266472  | HIPK3                                    | C/T | 11p | T | 0           | 0           |
|           | AQR, PLEKHA7,<br>hCG_1787519, LOC644889, |     |     |   |             |             |
| rs2668    | LOC729362                                | G/T | 11p | T | 0           | 0           |
| rs2761591 | DCDC1                                    | A/G | 11p | A | 0.008928571 | 0           |
| rs2857919 | ZNF214                                   | C/T | 11p | T | 0.040178571 | 0.022321429 |
| rs289080  | DCDC5                                    | G/T | 11p | T | 0           | 0           |
| rs2957516 | NAT10                                    | C/T | 11p | T | 0           | 0           |
| rs3026404 | ELP4                                     | C/G | 11p | G | 0.013392857 | 0.004464286 |
| rs317779  |                                          | C/T | 11p | C | 0.041284404 | 0.022727273 |
| rs3205367 | RPLP2, LRDD                              | A/G | 11p | G | 0           | 0.004464286 |
| rs325695  |                                          | A/T | 11p | A | 0.049107143 | 0.044642857 |
| rs3736508 | PHF21A                                   | C/T | 11p | T | 0.03125     | 0.022321429 |
| rs3740997 | TRIM34, TRIM6-TRIM34                     | C/G | 11p | C | 0.035714286 | 0.035714286 |
| rs3751095 | STK33                                    | C/T | 11p | T | 0.009433962 | 0           |
| rs3751096 | STK33                                    | A/C | 11p | C | 0           | 0.009090909 |

|            |                      |     |     |   |             |             |
|------------|----------------------|-----|-----|---|-------------|-------------|
| rs3758805  | PRMT3                | C/G | 11p | G | 0.004504505 | 0.018018018 |
| rs3802800  | NAV2                 | C/G | 11p | C | 0.022321429 | 0.017857143 |
| rs3887899  | IGSF22               | G/T | 11p | T | 0.004504505 | 0.004464286 |
| rs393044   | UBQLNL               | G/T | 11p | T | 0.004545455 | 0.004854369 |
| rs4151033  | RAG1                 | A/G | 11p | A | 0.004464286 | 0           |
| rs4755779  | EXT2                 | A/G | 11p | G | 0.004464286 | 0           |
| rs4758141  | OR10A2               | C/T | 11p | T | 0           | 0.010416667 |
| rs4758209  | PPFIBP2              | A/G | 11p | A | 0           | 0           |
| rs5006889  | OR51B6               | A/G | 11p | G | 0.03125     | 0.036697248 |
| rs5241     | CALCA                | A/C | 11p | A | 0.008928571 | 0.004464286 |
| rs543099   |                      | C/T | 11p | T | 0.044642857 | 0.035714286 |
| rs6483700  | PRMT3                | A/G | 11p | G | 0           | 0.008928571 |
| rs6578670  | TRIM34, TRIM6-TRIM34 | A/T | 11p | T | 0           | 0           |
| rs7109126  |                      | A/T | 11p | T | 0.008928571 | 0.004464286 |
| rs7111183  |                      | C/G | 11p | G | 0           | 0           |
| rs7111387  |                      | A/G | 11p | A | 0           | 0.005208333 |
| rs7394584  | OR52N4               | G/T | 11p | T | 0.026785714 | 0.044642857 |
| rs7396938  | OR52N4               | A/T | 11p | A | 0.013392857 | 0.035714286 |
| rs7479477  | OR51B6               | A/G | 11p | A | 0           | 0           |
| rs7926667  | LRP4                 | A/G | 11p | G | 0           | 0.004464286 |
| rs7933549  | OR51V1               | A/G | 11p | A | 0.004545454 | 0.004464286 |
| rs7934354  | OR52H1               | A/G | 11p | G | 0.017857143 | 0.03125     |
| rs7934670  | OR52N1               | A/T | 11p | A | 0.013392857 | 0.035714286 |
| rs7936354  | OTOG                 | C/T | 11p | T | 0           | 0           |
| rs7936512  | OR52N4               | C/T | 11p | C | 0.018691589 | 0.043269231 |
| rs7947732  | DCDC5                | C/T | 11p | T | 0           | 0           |
| rs10488698 | BUD13                | C/T | 11q | T | 0.035714286 | 0.071428571 |
| rs1064070  | THY1                 | C/T | 11q | T | 0           | 0           |
| rs10736442 | CUL5                 | C/G | 11q | G | 0           | 0           |
| rs10791962 | OR8U8                | A/T | 11q | T | 0           | 0           |
| rs10831088 |                      | A/G | 11q | G | 0.022321429 | 0.004464286 |
| rs10891338 | BCDO2                | C/T | 11q | T | 0.017857143 | 0.017857143 |
| rs10893192 | OR8G5                | A/G | 11q | G | 0.017857143 | 0.027027027 |
| rs10896310 | OR8U8, OR8U9         | A/G | 11q | A | 0.046296296 | 0.04587156  |
| rs10896516 | OR9G1                | C/T | 11q | C | 0           | 0           |
| rs10896517 | OR9G1                | A/G | 11q | G | 0           | 0           |
| rs1095423  | DKFZP586P0123        | A/G | 11q | G | 0.008928571 | 0.004504505 |



|            |               |     |     |   |             |             |
|------------|---------------|-----|-----|---|-------------|-------------|
| rs11212684 | EXPH5         | C/T | 11q | T | 0.022321429 | 0.035714286 |
| rs11213538 | ARHGAP20      | C/T | 11q | C | 0           | 0           |
| rs11216131 | BUD13         | A/C | 11q | A | 0.004464286 | 0           |
| rs11216349 | BACE1         | G/T | 11q | T | 0           | 0           |
| rs11225091 | KIAA1377      | A/G | 11q | A | 0.022321429 | 0.022321429 |
| rs11229062 | SERPING1      | C/G | 11q | G | 0           | 0           |
| rs11229277 | OR1S2         | A/G | 11q | G | 0           | 0           |
| rs11229278 | OR1S2         | C/T | 11q | T | 0           | 0           |
| rs11230707 | C11orf66      | A/C | 11q | A | 0           | 0           |
| rs11231180 | OR5D18        | A/G | 11q | A | 0           | 0           |
| rs11231918 | BATF2         | A/G | 11q | A | 0.013392857 | 0.008928571 |
| rs11235097 | TMEM135       | C/G | 11q | C | 0.027777778 | 0.023364486 |
| rs1144790  | PCNXL3        | C/G | 11q | C | 0           | 0           |
| rs11568491 |               | C/T | 11q | C | 0           | 0           |
| rs11602422 |               | C/T | 11q | T | 0           | 0.004464286 |
| rs11640    | TRAPPC4       | G/T | 11q | G | 0.008928571 | 0           |
| rs11821474 |               | C/T | 11q | C | 0           | 0           |
| rs11827779 |               | A/T | 11q | A | 0           | 0           |
| rs1216221  |               | C/T | 11q | T | 0           | 0           |
| rs12279985 | FXVD2         | C/T | 11q | C | 0.013392857 | 0           |
| rs12282288 | CCDC67        | A/G | 11q | G | 0.004950495 | 0           |
| rs12283300 | FAM86C        | G/T | 11q | T | 0           | 0           |
| rs12288277 | CCDC67        | C/G | 11q | C | 0.004716981 | 0.004901961 |
| rs12291622 | HEPHL1        | C/T | 11q | T | 0.020618557 | 0.021978022 |
| rs13807    | MRPL49, FAU   | C/T | 11q | T | 0.013636364 | 0.013636364 |
| rs1453543  | OR4D6         | C/T | 11q | T | 0           | 0.009009009 |
| rs1632242  | DKFZP586P0123 | C/T | 11q | C | 0           | 0           |
| rs1632245  | DKFZP586P0123 | A/C | 11q | A | 0           | 0           |
| rs1792641  |               | C/T | 11q | C | 0.013392857 | 0.013392857 |
| rs1800056  | ATM           | C/T | 11q | C | 0.022321429 | 0.027027027 |
| rs1800058  | ATM           | C/T | 11q | T | 0.017857143 | 0.013636364 |
| rs1800059  | ATM           | A/C | 11q | C | 0.008928571 | 0.013392857 |
| rs1801673  | ATM           | A/T | 11q | T | 0           | 0           |
| rs1802701  | RPS3          | A/C | 11q | A | 0           | 0           |
| rs1894176  | TMPRSS4       | C/T | 11q | T | 0.004464286 | 0           |
| rs1941635  | TMPRSS4       | G/T | 11q | T | 0.041666667 | 0.04587156  |
| rs1944169  | CNTN5         | A/T | 11q | A | 0           | 0           |

|           |           |     |     |   |             |             |
|-----------|-----------|-----|-----|---|-------------|-------------|
| rs1945783 | HEPHL1    | A/G | 11q | A | 0.004464286 | 0           |
| rs1979464 |           | G/T | 11q | T | 0           | 0.004504505 |
| rs2217401 | BCDO2     | G/T | 11q | T | 0           | 0.004464286 |
| rs2257265 | LOC390245 | A/G | 11q | G | 0           | 0.004807692 |
| rs2260655 | DAK       | A/G | 11q | G | 0.009009009 | 0.03125     |
| rs2276017 | MGC11102  | C/T | 11q | T | 0.04954955  | 0.040540541 |
| rs2276064 | TREH      | A/G | 11q | A | 0           | 0.026785714 |
| rs2276113 | BIRC3     | A/G | 11q | G | 0           | 0           |
| rs2276295 | GANAB     | C/T | 11q | T | 0           | 0           |
| rs2276296 | GANAB     | A/G | 11q | A | 0           | 0.008928571 |
| rs2276348 | ASAM      | C/T | 11q | T | 0.009009009 | 0.022727273 |
| rs2291348 | ADAMTS8   | C/T | 11q | C | 0.009009009 | 0.004464286 |
| rs2298808 | ARHGEF17  | A/C | 11q | A | 0           | 0           |
| rs2449148 | OR8H2     | A/G | 11q | A | 0           | 0           |
| rs2456022 | OR4C11    | G/T | 11q | G | 0           | 0           |
| rs2509062 | GLB1L3    | C/T | 11q | C | 0           | 0.008928571 |
| rs2512747 |           | A/G | 11q | G | 0           | 0           |
| rs2512938 | OR8K5     | A/G | 11q | G | 0           | 0           |
| rs2729772 | GDPD4     | C/T | 11q | C | 0.049107143 | 0.040178571 |
| rs297054  | OR5D14    | G/T | 11q | T | 0           | 0           |
| rs297081  | OR5D18    | C/T | 11q | T | 0           | 0           |
| rs3092856 | ATM       | C/T | 11q | T | 0           | 0           |
| rs3092857 | ATM       | A/G | 11q | G | 0.009259259 | 0.018348624 |
| rs317139  | NOX4      | C/T | 11q | C | 0.017857143 | 0.009009009 |
| rs3180820 | C11orf1   | C/G | 11q | C | 0           | 0           |
| rs3181320 | CASP5     | C/G | 11q | G | 0           | 0.009090909 |
| rs3181326 | CASP5     | C/G | 11q | C | 0           | 0           |
| rs3182750 | RAB6A     | C/G | 11q | C | 0           | 0           |
| rs3218673 | ATM       | C/T | 11q | T | 0           | 0           |
| rs3218707 | ATM       | C/G | 11q | C | 0.017857143 | 0           |
| rs3740772 | TSKU      | A/G | 11q | A | 0           | 0           |
| rs3740881 | APLP2     | A/G | 11q | A | 0           | 0           |
| rs382150  |           | C/T | 11q | C | 0           | 0.008928571 |
| rs4245219 | OR10Q1    | C/G | 11q | C | 0.017857143 | 0.022727273 |
| rs4252303 | IL10RA    | A/G | 11q | A | 0.018018018 | 0.004464286 |
| rs443028  |           | C/T | 11q | T | 0           | 0.004464286 |
| rs4581448 |           | C/T | 11q | C | 0.035714286 | 0.035714286 |

|           |                 |     |     |   |             |             |
|-----------|-----------------|-----|-----|---|-------------|-------------|
| rs4753495 |                 | A/C | 11q | C | 0           | 0           |
| rs4938895 | OR5B12          | A/G | 11q | A | 0           | 0           |
| rs4987945 | ATM             | C/G | 11q | G | 0           | 0           |
| rs5031003 |                 | A/G | 11q | A | 0           | 0.004464286 |
| rs506504  | CHEK1           | C/T | 11q | T | 0.036036036 | 0.040178571 |
| rs526433  | TECTA           | C/T | 11q | C | 0.009009009 | 0.004545454 |
| rs527887  |                 | C/T | 11q | T | 0           | 0.004464286 |
| rs532635  | OR9G1, OR9G9    | C/T | 11q | T | 0.009615385 | 0           |
| rs540687  | PRG3            | A/G | 11q | A | 0           | 0.009009009 |
| rs558465  | OR4C16          | C/T | 11q | C | 0           | 0           |
| rs565921  | TSGA10IP        | C/T | 11q | T | 0.040540541 | 0.031531532 |
| rs569108  | MS4A2           | C/T | 11q | C | 0.018018018 | 0.040178571 |
| rs601314  | EFEMP2          | C/T | 11q | T | 0           | 0.004464286 |
| rs621683  |                 | C/G | 11q | G | 0           | 0.004464286 |
| rs633557  | DNAJC4, NUDT22  | A/G | 11q | A | 0           | 0.004464286 |
| rs6589670 | TREH, PHLDB1    | C/G | 11q | G | 0           | 0           |
| rs6590021 | OR6T1           | A/G | 11q | A | 0           | 0.008928571 |
| rs6591569 | OR4S2           | C/T | 11q | C | 0           | 0.004807692 |
| rs669661  | PRG3            | C/T | 11q | T | 0           | 0.008928571 |
| rs675815  | GLYAT           | C/T | 11q | T | 0.018181818 | 0.008928571 |
| rs7102218 | BCDO2           | G/T | 11q | T | 0.017857143 | 0.018018018 |
| rs7102584 | KCNJ5           | C/G | 11q | C | 0.009259259 | 0.013888889 |
| rs7117495 | IGHMBP2, MRPL21 | A/G | 11q | A | 0           | 0           |
| rs7121880 | OR5T2           | C/G | 11q | C | 0.045045045 | 0.104545454 |
| rs7125171 |                 | C/T | 11q | C | 0.040178571 | 0.031531531 |
| rs7126079 | OR5T1           | C/T | 11q | T | 0           | 0           |
| rs7126904 | ST14            | A/G | 11q | A | 0           | 0           |
| rs7358374 | DYNC2H1         | A/G | 11q | A | 0           | 0           |
| rs768436  | SSRP1           | C/G | 11q | C | 0.004464286 | 0           |
| rs7927015 | OR8J1           | G/T | 11q | T | 0.044642857 | 0.098214286 |
| rs7933186 |                 | C/T | 11q | C | 0.044642857 | 0.098214286 |
| rs7937317 | OR6T1           | C/T | 11q | C | 0           | 0.008928571 |
| rs7937661 |                 | C/G | 11q | C | 0           | 0.004464286 |
| rs7938203 | CLPB            | C/G | 11q | G | 0           | 0           |
| rs7939917 | TMPRSS5         | C/T | 11q | T | 0           | 0           |
| rs7946238 | ANGPTL5         | A/G | 11q | G | 0.004504505 | 0           |
| rs7950441 | NADSYN1         | A/C | 11q | A | 0           | 0           |

|            |               |     |     |   |             |             |
|------------|---------------|-----|-----|---|-------------|-------------|
| rs826071   | DKFZP586P0123 | C/T | 11q | C | 0.035714286 | 0.018018018 |
| rs877474   | EXPH5         | A/G | 11q | G | 0.008928571 | 0.013392857 |
| rs9332838  | MLL           | C/G | 11q | G | 0           | 0           |
| rs940611   | HRASLS5       | C/G | 11q | G | 0.035714286 | 0.058558559 |
| rs948477   | CATSPER1      | C/T | 11q | T | 0           | 0           |
| rs9666086  | OR5I1         | A/G | 11q | G | 0.044642857 | 0.098214286 |
| rs1037921  | ARNTL2        | C/T | 12p | C | 0.040909091 | 0.040178571 |
| rs10505830 | PLCZ1         | A/G | 12p | A | 0.049107143 | 0.040178571 |
| rs1051347  | CACNA1C       | A/G | 12p | A | 0           | 0           |
| rs1054423  | IPO8          | A/T | 12p | T | 0           | 0           |
| rs1065751  | RECQL         | A/G | 12p | A | 0           | 0           |
| rs10772299 |               | C/T | 12p | T | 0           | 0           |
| rs10845279 | TAS2R49       | A/C | 12p | A | 0           | 0           |
| rs11047499 | A2ML1         | C/G | 12p | C | 0           | 0.004464286 |
| rs11047611 |               | C/G | 12p | C | 0.035714286 | 0.022321429 |
| rs11047724 | BCAT1         | A/C | 12p | A | 0           | 0           |
| rs11053974 |               | A/G | 12p | A | 0.022321429 | 0.009009009 |
| rs11054044 | TAS2R9        | C/G | 12p | G | 0           | 0           |
| rs11054201 | PRB3          | A/G | 12p | G | 0           | 0.009009009 |
| rs11054243 | PRB4          | C/G | 12p | C | 0           | 0           |
| rs11055389 | C12orf36      | A/G | 12p | A | 0.031531531 | 0.03125     |
| rs11056560 | PTPRO         | G/T | 12p | T | 0           | 0           |
| rs11061915 | SLC6A12       | C/T | 12p | T | 0.004545455 | 0.013392857 |
| rs11062857 | PARP11        | A/G | 12p | G | 0.004504505 | 0           |
| rs11064480 | EMG1, PHB2    | C/G | 12p | G | 0.035714286 | 0.031818182 |
| rs11568563 | SLCO1A2       | A/C | 12p | C | 0.022321429 | 0.058035714 |
| rs12319376 | ERC1          | A/G | 12p | G | 0.045045045 | 0.026785714 |
| rs12320769 |               | A/G | 12p | A | 0           | 0           |
| rs1420635  | GUCY2C        | G/T | 12p | T | 0           | 0           |
| rs1527014  | LOC729025     | A/G | 12p | G | 0.026785714 | 0.03125     |
| rs15547    | CAPZA3        | A/G | 12p | A | 0           | 0           |
| rs1801016  | DYRK4, AKAP3  | A/T | 12p | T | 0           | 0           |
| rs1805749  | KLRG1         | A/G | 12p | G | 0           | 0           |
| rs1860926  | A2ML1         | G/T | 12p | G | 0           | 0           |
| rs1941     | HEBP1         | C/G | 12p | C | 0.03125     | 0.035714286 |
| rs1973290  | PLCZ1         | C/T | 12p | C | 0.017857143 | 0.017857143 |
| rs2071072  | LRRRC23       | A/C | 12p | C | 0           | 0.004464286 |

|           |               |     |     |   |             |             |
|-----------|---------------|-----|-----|---|-------------|-------------|
| rs2071073 | LRRC23        | G/T | 12p | T | 0.013392857 | 0.013513514 |
| rs2072357 | AKAP3         | C/T | 12p | T | 0.044642857 | 0.049107143 |
| rs2199688 | SLCO1A2       | A/C | 12p | C | 0           | 0.009009009 |
| rs2253849 | KLRC1         | C/T | 12p | T | 0           | 0           |
| rs226405  | A2M           | A/G | 12p | A | 0           | 0           |
| rs2287541 | FLJ22662      | A/G | 12p | G | 0.040178571 | 0.040540541 |
| rs2302516 | GDF3          | C/G | 12p | G | 0.03125     | 0.017857143 |
| rs2304459 | FAM60A        | C/T | 12p | T | 0           | 0           |
| rs2306182 | KLRK1         | A/G | 12p | G | 0           | 0           |
| rs2306282 | SLCO1B1       | C/T | 12p | C | 0           | 0.004504504 |
| rs2377249 |               | A/G | 12p | G | 0           | 0           |
| rs2377741 | PZP           | G/T | 12p | T | 0           | 0           |
| rs2532502 | CD27, TAPBPL  | C/T | 12p | T | 0.013513514 | 0.004464286 |
| rs2537817 | TAS2R8        | C/T | 12p | T | 0.004504505 | 0           |
| rs2682491 | KLRC3         | C/G | 12p | C | 0           | 0           |
| rs2682495 | KLRC3         | C/G | 12p | G | 0           | 0           |
| rs3203835 | NECAP1        | C/T | 12p | T | 0           | 0           |
| rs3213431 | GNB3, LEPREL2 | C/T | 12p | C | 0           | 0.004464286 |
| rs3741795 | LOH12CR1      | C/G | 12p | C | 0           | 0           |
| rs3741803 | MANSC1        | A/T | 12p | T | 0           | 0.004464286 |
| rs3741923 | ACRBP         | C/T | 12p | C | 0           | 0           |
| rs3741927 | DYRK4         | A/G | 12p | G | 0           | 0           |
| rs3764045 | SLCO1A2       | G/T | 12p | G | 0           | 0           |
| rs3809251 | PARP11        | C/T | 12p | C | 0.03125     | 0.03125     |
| rs4072797 | CD163L1       | C/T | 12p | T | 0           | 0           |
| rs4149584 | TNFRSF1A      | A/G | 12p | A | 0.013513513 | 0.026785714 |
| rs4149637 | TNFRSF1A      | C/T | 12p | T | 0           | 0           |
| rs4340155 |               | A/G | 12p | G | 0.004464286 | 0           |
| rs4519167 | C1R           | C/G | 12p | G | 0           | 0.009090909 |
| rs4883263 | CD163         | C/T | 12p | T | 0.022321429 | 0.049107143 |
| rs4883476 |               | C/T | 12p | T | 0.004587156 | 0.009345794 |
| rs4931444 | OVOS2         | G/T | 12p | G | 0.049107143 | 0.067567568 |
| rs4987206 | RAD52         | C/G | 12p | G | 0           | 0           |
| rs4987207 | RAD52         | A/C | 12p | A | 0.004464286 | 0.004504504 |
| rs4987208 | RAD52         | G/T | 12p | G | 0.022321429 | 0.027027027 |
| rs4987215 | RECQL         | C/G | 12p | C | 0.018018018 | 0           |
| rs583903  | CLEC1B        | A/G | 12p | G | 0           | 0           |

|            |                |     |     |   |             |             |
|------------|----------------|-----|-----|---|-------------|-------------|
| rs597468   | TAS2R10        | A/G | 12p | G | 0.004464286 | 0           |
| rs612593   | CLEC1B         | A/G | 12p | A | 0           | 0           |
| rs6488268  | CD163L1        | A/T | 12p | A | 0           | 0           |
| rs6501     | RECQL          | A/C | 12p | C | 0.004464286 | 0.004464286 |
| rs7295376  | TAPBPL         | C/G | 12p | C | 0           | 0           |
| rs7306401  |                | C/T | 12p | C | 0.004464286 | 0.004464286 |
| rs7308685  | C12orf36       | C/T | 12p | C | 0           | 0           |
| rs7315461  |                | C/T | 12p | T | 0.044642857 | 0.053571429 |
| rs7957558  | FLJ22662       | C/T | 12p | C | 0.022321429 | 0.03125     |
| rs7960177  | LOC390282      | C/T | 12p | T | 0.004464286 | 0.008928571 |
| rs7961645  | FGF6           | A/T | 12p | A | 0.004464286 | 0           |
| rs859146   | LRMP, CASC1    | A/C | 12p | C | 0           | 0           |
| rs864161   | LOC196415      | C/G | 12p | G | 0.019607843 | 0.024271845 |
| rs1001178  | DIABLO, B3GNT4 | A/T | 12q | T | 0.013392857 | 0.013392857 |
| rs10082778 | UTP20          | A/T | 12q | T | 0           | 0.013513514 |
| rs10243    | KIF21A         | A/G | 12q | A | 0           | 0           |
| rs1045496  | C12orf65       | A/G | 12q | A | 0           | 0           |
| rs10506344 |                | A/G | 12q | G | 0           | 0.017857143 |
| rs10506644 | TPH2           | A/G | 12q | G | 0           | 0           |
| rs1050710  | NELL2          | C/T | 12q | T | 0           | 0           |
| rs1057907  | DDX23          | C/T | 12q | T | 0           | 0           |
| rs1065730  | TUBA1A         | A/G | 12q | A | 0           | 0           |
| rs10778677 | LOC338756      | A/C | 12q | C | 0.004464286 | 0.008928571 |
| rs10778679 | LOC338756      | C/G | 12q | C | 0.004464286 | 0.008928571 |
| rs10847725 | LRRRC43        | C/T | 12q | C | 0.004504504 | 0.008928571 |
| rs10876360 | KRT78          | C/T | 12q | T | 0.013392857 | 0           |
| rs11061318 | GPR133         | C/T | 12q | T | 0.026785714 | 0.026785714 |
| rs11065998 | BRAP           | A/C | 12q | A | 0           | 0.004504504 |
| rs11068997 | GIT2           | A/G | 12q | A | 0.036036036 | 0.022321429 |
| rs11104703 | C12orf50       | C/T | 12q | T | 0.049107143 | 0.080357143 |
| rs11104729 | CEP290         | C/T | 12q | C | 0           | 0           |
| rs11105882 | C12orf12       | A/C | 12q | C | 0           | 0           |
| rs11107500 | PLXNC1         | A/G | 12q | A | 0           | 0           |
| rs11109474 | BBS10          | A/G | 12q | A | 0           | 0           |
| rs11147241 | hCG_1646157    | A/G | 12q | G | 0.013392857 | 0.013392857 |
| rs11168263 | VDR            | A/G | 12q | G | 0.008928571 | 0.008928571 |
| rs11169226 | AQP2           | C/T | 12q | T | 0           | 0           |

|            |                        |     |     |   |             |             |
|------------|------------------------|-----|-----|---|-------------|-------------|
| rs11170883 | GPR84                  | C/T | 12q | T | 0.004545455 | 0.004545455 |
| rs11171276 |                        | A/G | 12q | G | 0.038095238 | 0.024752475 |
| rs11171388 | OR6C74                 | C/T | 12q | T | 0           | 0           |
| rs11171466 | OR6C2                  | C/G | 12q | G | 0           | 0           |
| rs11171743 | ERBB3                  | A/G | 12q | A | 0           | 0           |
| rs11171907 | BAZ2A                  | C/G | 12q | G | 0           | 0           |
| rs11176666 | MUC19                  | A/G | 12q | A | 0           | 0           |
| rs11177386 | MDM2                   | A/G | 12q | A | 0           | 0.004587156 |
| rs11177991 | C12orf28               | G/T | 12q | T | 0           | 0           |
| rs11178192 | CNOT2                  | A/G | 12q | A | 0.004545454 | 0           |
| rs11181011 | PDZRN4                 | A/G | 12q | G | 0           | 0           |
| rs11183450 | SLC38A2                | C/G | 12q | C | 0           | 0           |
| rs11183610 | SLC38A4                | A/G | 12q | A | 0.009009009 | 0.008928571 |
| rs11568527 |                        | C/T | 12q | T | 0           | 0           |
| rs11574542 | ITGB7, ZNF740          | A/G | 12q | A | 0           | 0           |
| rs11575245 |                        | G/T | 12q | T | 0.022321429 | 0.008928571 |
| rs1177573  | PSMD9                  | A/G | 12q | A | 0           | 0.004504504 |
| rs1185845  | HCFC2                  | C/T | 12q | T | 0           | 0           |
| rs1249958  | PPP1R1A                | C/T | 12q | T | 0.004464286 | 0.004464286 |
| rs1260318  | MPHOSPH9               | A/C | 12q | A | 0           | 0.004464286 |
| rs1445436  | FLJ41278               | C/T | 12q | T | 0           | 0           |
| rs1534282  | AAAS, C12orf10, ZNF740 | A/G | 12q | G | 0.023148148 | 0.023809524 |
| rs1669885  | PPHLN1                 | G/T | 12q | T | 0           | 0           |
| rs1918496  | USP52                  | A/C | 12q | A | 0.004464286 | 0.004464286 |
| rs1948516  | TMEM117                | A/G | 12q | A | 0.004504504 | 0           |
| rs2066811  | STAT2                  | A/G | 12q | G | 0.004504505 | 0.004464286 |
| rs2066815  | STAT2                  | C/T | 12q | T | 0           | 0           |
| rs2066816  | STAT2                  | G/T | 12q | T | 0           | 0           |
| rs2069413  | CDK2                   | C/G | 12q | G | 0           | 0           |
| rs2071024  | SILV                   | A/C | 12q | A | 0.009615385 | 0.023148148 |
| rs2173970  | hCG_1646157            | C/G | 12q | G | 0           | 0           |
| rs2229373  | ZNF140                 | C/T | 12q | T | 0           | 0.009259259 |
| rs2230579  | BAZ2A                  | A/T | 12q | A | 0.013392857 | 0.004504504 |
| rs2232402  | KRT75                  | A/G | 12q | G | 0.004464286 | 0           |
| rs2232565  | LALBA                  | A/G | 12q | G | 0.026785714 | 0.036036036 |
| rs2233919  | SMUG1                  | C/T | 12q | T | 0           | 0           |
| rs2242365  |                        | C/T | 12q | T | 0.044642857 | 0.035714286 |

|           |                  |     |     |   |             |             |
|-----------|------------------|-----|-----|---|-------------|-------------|
| rs2256408 | LRRK2            | A/G | 12q | G | 0.009090909 | 0           |
| rs2277319 | PIP4K2C          | C/G | 12q | G | 0.017857143 | 0.013392857 |
| rs2277330 | KRT8             | A/G | 12q | A | 0           | 0           |
| rs2287174 | ANKRD13A         | C/T | 12q | C | 0.035714286 | 0.026785714 |
| rs2292506 | KRT71            | C/T | 12q | T | 0.03125     | 0.049107143 |
| rs2293624 |                  | C/T | 12q | T | 0.035714286 | 0.044642857 |
| rs2306691 | LRP1             | A/G | 12q | G | 0.004464286 | 0.008928571 |
| rs2364600 | ESPL1, ZNF740    | C/T | 12q | T | 0.004464286 | 0           |
| rs2638876 | MUC19            | C/T | 12q | T | 0           | 0           |
| rs2657881 | GLS2, SPRYD4     | A/G | 12q | A | 0           | 0           |
| rs3741694 | TBX5             | A/G | 12q | G | 0.004464286 | 0           |
| rs3782356 | MLL2             | C/T | 12q | T | 0           | 0           |
| rs3802998 | WIBG             | C/G | 12q | C | 0           | 0           |
| rs3803079 |                  | A/T | 12q | T | 0.044642857 | 0.040178571 |
| rs3829295 | E2F7             | C/T | 12q | C | 0           | 0           |
| rs3864938 | GCN1L1           | A/C | 12q | A | 0.004464286 | 0.004464286 |
| rs4135113 | TDG              | A/G | 12q | A | 0.035714286 | 0.045045045 |
| rs4296098 | C12orf26         | A/C | 12q | C | 0.04245283  | 0.048076923 |
| rs4301049 |                  | A/C | 12q | C | 0.044642857 | 0.066964286 |
| rs4301822 | APOF             | C/T | 12q | C | 0           | 0.008928571 |
| rs4761946 |                  | A/G | 12q | A | 0.004672897 | 0           |
| rs4768279 | MUC19, LOC647546 | G/T | 12q | G | 0           | 0           |
| rs555131  | TMEM132D         | A/C | 12q | A | 0.040178571 | 0.03125     |
| rs5635    | PLA2G1B          | A/C | 12q | C | 0           | 0.004504505 |
| rs5636    | PLA2G1B          | A/C | 12q | A | 0           | 0           |
| rs5744760 | POLE             | A/G | 12q | G | 0.004504505 | 0           |
| rs5744933 | POLE             | A/G | 12q | G | 0.00462963  | 0.004545455 |
| rs5744935 | POLE             | C/G | 12q | C | 0           | 0           |
| rs6489085 |                  | A/G | 12q | A | 0           | 0           |
| rs7134607 |                  | C/T | 12q | T | 0           | 0           |
| rs7294635 | LOC642539        | C/T | 12q | C | 0           | 0           |
| rs7302446 | ADAMTS20         | A/T | 12q | A | 0.035714286 | 0.026785714 |
| rs7309681 |                  | C/T | 12q | T | 0           | 0           |
| rs7313899 | OR6C4            | A/G | 12q | A | 0.008928571 | 0.004464286 |
| rs764941  | MLL2             | C/G | 12q | C | 0           | 0           |
| rs7963111 |                  | G/T | 12q | T | 0.027027027 | 0.053571429 |
| rs7966369 |                  | A/G | 12q | A | 0           | 0           |



|            |               |     |     |   |             |             |
|------------|---------------|-----|-----|---|-------------|-------------|
| rs7968520  | KIAA0692      | C/G | 12q | C | 0.035714286 | 0.044642857 |
| rs7969937  |               | A/C | 12q | A | 0.008928571 | 0.008928571 |
| rs7978197  | CPM           | C/T | 12q | T | 0.018018018 | 0.013392857 |
| rs8179142  | SELPLG        | C/T | 12q | T | 0           | 0           |
| rs829121   | TMPRSS12      | C/T | 12q | C | 0           | 0           |
| rs925368   | GIT2          | A/G | 12q | G | 0           | 0           |
| rs9668527  | FLJ20674      | C/T | 12q | T | 0.004587156 | 0.02293578  |
| rs1043015  | KPNA3         | C/T | 13q | T | 0           | 0           |
| rs1046984  | BRCA2         | C/T | 13q | T | 0           | 0           |
| rs1051577  | GPR18, UBAC2  | A/C | 13q | A | 0           | 0           |
| rs1058576  | HTR2A         | C/T | 13q | T | 0           | 0           |
| rs10767    | RBM26         | A/T | 13q | T | 0           | 0.004464286 |
| rs11568646 |               | A/G | 13q | G | 0.004464286 | 0           |
| rs11568681 |               | A/C | 13q | A | 0           | 0           |
| rs11571746 | BRCA2         | C/T | 13q | C | 0           | 0           |
| rs11571769 | BRCA2         | A/G | 13q | A | 0           | 0           |
| rs11841997 | GUCY1B2       | C/G | 13q | G | 0.049107143 | 0.03125     |
| rs11843461 | RP11-139H14.4 | A/G | 13q | G | 0.017857143 | 0.009009009 |
| rs1327321  |               | C/T | 13q | C | 0           | 0           |
| rs1372085  | PARP4         | C/T | 13q | T | 0.044642857 | 0.058035714 |
| rs1375720  | LOC643677     | A/G | 13q | G | 0           | 0           |
| rs169547   | BRCA2         | A/G | 13q | A | 0           | 0           |
| rs1799944  | BRCA2         | A/G | 13q | G | 0.03125     | 0.045454546 |
| rs1799951  | BRCA2         | A/G | 13q | G | 0           | 0.004504505 |
| rs1799954  | BRCA2         | C/T | 13q | T | 0.004464286 | 0.008928571 |
| rs1801426  | BRCA2         | A/G | 13q | G | 0           | 0           |
| rs1803542  | ERCC5         | A/C | 13q | A | 0           | 0           |
| rs1805055  | HTR2A         | A/C | 13q | A | 0.03125     | 0.045045045 |
| rs1822135  | PARP4         | A/G | 13q | A | 0.044642857 | 0.0625      |
| rs1868463  | FREM2         | C/T | 13q | T | 0.044642857 | 0.040178571 |
| rs2014593  |               | G/T | 13q | G | 0.004464286 | 0.004464286 |
| rs202084   | KATNAL1       | A/C | 13q | A | 0           | 0.004464286 |
| rs2219594  | BRCA2         | G/T | 13q | T | 0           | 0           |
| rs2227869  | ERCC5         | C/G | 13q | C | 0.036036036 | 0.054054054 |
| rs2227944  | BRCA2         | A/T | 13q | T | 0           | 0           |
| rs2228271  | EDNRB         | G/T | 13q | T | 0           | 0.004545455 |
| rs2232642  | LIG4          | A/G | 13q | A | 0.004464286 | 0           |

|           |              |     |     |   |             |             |
|-----------|--------------|-----|-----|---|-------------|-------------|
| rs2274083 | GJB2         | C/T | 13q | C | 0.004545454 | 0.008928571 |
| rs2274810 | RP11-125A7.3 | C/T | 13q | T | 0.044642857 | 0.03125     |
| rs2274827 | SLC15A1      | A/G | 13q | A | 0           | 0.004504504 |
| rs2307491 | ERCC5        | C/G | 13q | G | 0           | 0           |
| rs2497218 | TPTE2        | C/T | 13q | T | 0           | 0           |
| rs259797  | ZMYM2        | C/T | 13q | T | 0           | 0           |
| rs2798263 |              | A/G | 13q | A | 0.004464286 | 0           |
| rs2987346 | KIAA0774     | A/G | 13q | G | 0.026785714 | 0.027027027 |
| rs3742192 | FLJ10769     | A/G | 13q | A | 0.004504504 | 0.004464286 |
| rs3764522 | C13orf8      | C/G | 13q | C | 0           | 0           |
| rs3765534 | ABCC4        | C/T | 13q | T | 0.008928571 | 0.008928571 |
| rs3783055 |              | C/G | 13q | C | 0.004504504 | 0           |
| rs3812874 | PCDH20       | G/T | 13q | T | 0.031531532 | 0.044642857 |
| rs4150313 | ERCC5        | A/G | 13q | G | 0           | 0.004464286 |
| rs4150342 | ERCC5        | A/G | 13q | G | 0.008928571 | 0.004464286 |
| rs4151539 | RB1          | C/G | 13q | G | 0           | 0           |
| rs4646227 | SLC15A1      | C/G | 13q | C | 0.017857143 | 0.03125     |
| rs4770450 |              | A/G | 13q | G | 0.03125     | 0.031818182 |
| rs4770684 | PARP4        | A/G | 13q | A | 0.036697248 | 0.038095238 |
| rs4986860 | BRCA2        | A/G | 13q | G | 0           | 0           |
| rs4987047 | BRCA2        | A/T | 13q | T | 0.004761905 | 0           |
| rs4987117 | BRCA2        | C/T | 13q | T | 0.03125     | 0.031531532 |
| rs4987168 | ERCC5        | A/G | 13q | G | 0           | 0           |
| rs5352    | EDNRB        | A/G | 13q | A | 0.013392857 | 0.013392857 |
| rs5961    | F10          | C/G | 13q | C | 0           | 0.004464286 |
| rs640192  | LOC730249    | A/G | 13q | G | 0.004504505 | 0.004504505 |
| rs6491707 | FLJ40176     | A/G | 13q | A | 0           | 0           |
| rs6492027 |              | C/T | 13q | C | 0           | 0           |
| rs6561512 | CDADC1       | A/G | 13q | A | 0.008928571 | 0.008928571 |
| rs7322326 |              | A/G | 13q | A | 0           | 0           |
| rs7326172 | LOC390427    | A/C | 13q | A | 0           | 0           |
| rs7329939 | FREM2        | C/G | 13q | G | 0.017857143 | 0.022321429 |
| rs7334445 | C13orf21     | C/T | 13q | T | 0.004464286 | 0           |
| rs7335290 | FLJ40176     | A/C | 13q | A | 0           | 0           |
| rs7335867 | CKAP2        | A/G | 13q | A | 0           | 0.004464286 |
| rs7336216 | CENPJ        | C/G | 13q | G | 0           | 0.004504505 |
| rs7338624 | ENOX1        | C/G | 13q | G | 0.004504505 | 0           |

|            |                     |     |     |   |             |             |
|------------|---------------------|-----|-----|---|-------------|-------------|
| rs749071   | FLJ32682            | A/G | 13q | A | 0           | 0           |
| rs766173   | BRCA2               | G/T | 13q | G | 0.03125     | 0.045045045 |
| rs7998869  | FLJ44054            | A/C | 13q | A | 0.040178571 | 0.049107143 |
| rs7999148  |                     | A/G | 13q | A | 0.004464286 | 0           |
| rs8187838  | SLC15A1             | A/C | 13q | A | 0.029126214 | 0.025252525 |
| rs9300757  | FLJ40176, LOC643677 | A/G | 13q | G | 0           | 0           |
| rs9300758  | FLJ40176, LOC643677 | A/G | 13q | A | 0.004504504 | 0           |
| rs9315812  | MTRF1               | C/T | 13q | C | 0           | 0.004464286 |
| rs9511259  | PARP4               | A/C | 13q | A | 0.044642857 | 0.068807339 |
| rs9577230  | LAMP1               | C/T | 13q | C | 0           | 0.004464286 |
| rs9578190  | USPL1               | C/G | 13q | G | 0.00462963  | 0           |
| rs10131326 | OR4N5               | A/G | 14q | G | 0           | 0           |
| rs10134472 | OR4N5               | C/T | 14q | C | 0           | 0           |
| rs10139784 | SPATA7              | A/G | 14q | A | 0           | 0           |
| rs10141546 | LTBP2               | A/C | 14q | A | 0           | 0           |
| rs10142502 | C14orf159           | C/T | 14q | T | 0           | 0           |
| rs10162564 | CTAGE5              | A/G | 14q | G | 0           | 0           |
| rs1046701  | C14orf149           | C/T | 14q | T | 0.044642857 | 0.044642857 |
| rs1051193  | SEL1L               | A/G | 14q | A | 0.013636364 | 0.013392857 |
| rs1053019  | C14orf131           | A/C | 14q | A | 0.044642857 | 0.066964286 |
| rs1055061  | HOMEZ               | A/G | 14q | A | 0.03125     | 0.059090909 |
| rs1057683  | SFRS5               | G/T | 14q | T | 0           | 0           |
| rs1111758  | C14orf143           | A/C | 14q | C | 0.008928571 | 0.031531532 |
| rs11625921 | C14orf39            | C/T | 14q | C | 0.022321429 | 0.036036036 |
| rs11846740 | ACOT6               | C/T | 14q | T | 0           | 0           |
| rs11848004 | TTLL5               | A/G | 14q | A | 0.004464286 | 0.009009009 |
| rs11851376 | TRIP11              | C/T | 14q | T | 0           | 0.004464286 |
| rs1270764  | TSSK4               | C/T | 14q | C | 0           | 0.004504504 |
| rs1309353  | KIAA0329            | A/G | 14q | G | 0.040909091 | 0.026785714 |
| rs1543540  | C14orf131           | A/G | 14q | A | 0.044642857 | 0.022321429 |
| rs1617510  | KIAA0586            | C/G | 14q | C | 0           | 0           |
| rs1713457  | TEP1                | C/G | 14q | G | 0.03125     | 0.03125     |
| rs17473    | SERPINA3            | C/G | 14q | C | 0.004545454 | 0.008928571 |
| rs1748986  | KIAA0586            | C/T | 14q | T | 0           | 0           |
| rs175081   | MLH3                | C/T | 14q | T | 0           | 0           |
| rs17560    | ANG, RNASE4         | A/G | 14q | G | 0           | 0           |
| rs177386   | PAPLN               | A/G | 14q | A | 0.04054054  | 0.017857143 |

|           |                    |     |     |   |             |             |
|-----------|--------------------|-----|-----|---|-------------|-------------|
| rs1803118 | APEX1, TMEM55B     | C/T | 14q | T | 0           | 0           |
| rs1803120 | APEX1, TMEM55B     | C/T | 14q | T | 0           | 0           |
| rs1807442 |                    | A/G | 14q | A | 0.004587156 | 0.009615385 |
| rs2039475 | SYNE2              | A/G | 14q | A | 0.004464286 | 0.009009009 |
| rs2074930 | COQ6               | A/T | 14q | A | 0.017857143 | 0.026785714 |
| rs2124843 |                    | C/T | 14q | T | 0           | 0           |
| rs2227279 | BDKRB2             | A/G | 14q | A | 0.004464286 | 0           |
| rs2228337 | TGM1               | A/T | 14q | T | 0           | 0           |
| rs2228575 | CHGA               | A/G | 14q | A | 0.004464286 | 0           |
| rs2234634 | SLC39A2            | A/G | 14q | G | 0           | 0.004504505 |
| rs2273841 | TDRD9              | G/T | 14q | G | 0.004464286 | 0.009009009 |
| rs2273906 | KIAA0329           | C/T | 14q | T | 0.045045045 | 0.027027027 |
| rs2273947 | DHRS4L2, LOC731356 | A/T | 14q | T | 0.040909091 | 0.116071429 |
| rs2275017 | SYNE2              | C/T | 14q | T | 0           | 0           |
| rs2289622 | ATG2B              | A/G | 14q | A | 0.03125     | 0.004504504 |
| rs2296687 | KIAA1409           | C/T | 14q | C | 0           | 0           |
| rs2296700 |                    | A/G | 14q | G | 0.027027027 | 0.009090909 |
| rs2297717 | METT11D1           | C/G | 14q | G | 0           | 0.004464286 |
| rs2307486 | APEX1, TMEM55B     | A/G | 14q | G | 0           | 0.004464286 |
| rs2402073 | TC2N               | G/T | 14q | T | 0           | 0           |
| rs2781377 | SYNE2              | C/T | 14q | T | 0           | 0           |
| rs3021119 | NRL, PCK2          | A/C | 14q | A | 0           | 0           |
| rs3093905 | PARP2              | A/G | 14q | A | 0           | 0           |
| rs3093906 | PARP2              | A/G | 14q | G | 0           | 0.004504505 |
| rs3093921 | PARP2              | A/G | 14q | G | 0.004464286 | 0.031818182 |
| rs3100906 | SDCCAG1            | A/T | 14q | A | 0.004504504 | 0.004504504 |
| rs3742601 | SPTB               | G/T | 14q | T | 0.004464286 | 0           |
| rs3742883 | ZFYVE26            | C/T | 14q | T | 0           | 0           |
| rs3742884 | ZFYVE26            | A/G | 14q | A | 0.017857143 | 0.018018018 |
| rs3742885 | ZFYVE26            | A/G | 14q | A | 0.017857143 | 0.018181818 |
| rs3748360 | RPGRIP1            | C/T | 14q | T | 0           | 0           |
| rs3751501 | ACIN1              | A/G | 14q | A | 0.035714286 | 0.035714286 |
| rs3759666 | DLG7               | A/G | 14q | A | 0.022522522 | 0.004504504 |
| rs3784071 | MED6               | A/G | 14q | A | 0.004504504 | 0.008928571 |
| rs4394993 |                    | G/T | 14q | T | 0           | 0           |
| rs5246    | CMA1               | C/G | 14q | C | 0.004504504 | 0           |
| rs5247    | CMA1               | A/G | 14q | G | 0.022522523 | 0.027272727 |

|            |              |     |     |   |             |             |
|------------|--------------|-----|-----|---|-------------|-------------|
| rs6120     | SERPINA5     | C/G | 14q | G | 0           | 0           |
| rs6413532  | SLC39A2      | A/G | 14q | A | 0           | 0.004716981 |
| rs6575799  | DLK1         | A/G | 14q | A | 0           | 0           |
| rs7146672  | PSME2        | G/T | 14q | T | 0.017857143 | 0.009009009 |
| rs7151995  | KIAA0323     | G/T | 14q | G | 0.008928571 | 0.031531531 |
| rs748358   | AHNAK2       | C/T | 14q | T | 0.004464286 | 0           |
| rs8017950  | C14orf70     | A/G | 14q | G | 0.022522523 | 0.044642857 |
| rs8020347  |              | A/G | 14q | A | 0.004545454 | 0.004545454 |
| rs943992   | FLJ10357     | C/T | 14q | C | 0.035714286 | 0.040178571 |
| rs9464     | C14orf131    | A/G | 14q | A | 0.044642857 | 0.0625      |
| rs946616   | PYGL         | A/G | 14q | A | 0.046728972 | 0.081818182 |
| rs9658654  | CHGA         | A/G | 14q | A | 0           | 0           |
| rs9658663  | CHGA         | C/G | 14q | G | 0           | 0           |
| rs9658664  | CHGA         | A/G | 14q | A | 0.008928571 | 0.013392857 |
| rs1030986  | LCTL         | C/T | 15q | T | 0.013513514 | 0.004464286 |
| rs1047552  | APH1B        | G/T | 15q | G | 0.022321429 | 0.03125     |
| rs10518816 | PRTG         | C/G | 15q | G | 0           | 0           |
| rs10519020 | SLC28A2      | C/G | 15q | C | 0           | 0           |
| rs10519239 |              | C/T | 15q | T | 0.03125     | 0.045045045 |
| rs10519996 | ATPBD4       | C/G | 15q | C | 0           | 0.008928571 |
| rs10851808 | LOC145837    | A/G | 15q | G | 0.009009009 | 0.018867925 |
| rs11071990 | CLN6, CALML4 | A/G | 15q | A | 0.009090909 | 0.013392857 |
| rs12101559 | ZFP106       | A/G | 15q | G | 0.013761468 | 0.023364486 |
| rs12437941 | UNC13C       | A/G | 15q | G | 0           | 0           |
| rs12440300 | GLCE         | A/G | 15q | G | 0.017857143 | 0.026785714 |
| rs1280395  | CGNL1        | A/C | 15q | A | 0           | 0           |
| rs140605   | FBN1         | A/G | 15q | G | 0           | 0           |
| rs1426654  | SLC24A5      | A/G | 15q | G | 0           | 0           |
| rs1469778  | NOPE         | A/T | 15q | T | 0           | 0           |
| rs1724577  | MYO5A        | G/T | 15q | T | 0           | 0           |
| rs1800431  | HEXA         | A/G | 15q | A | 0           | 0           |
| rs1867380  | AQP9         | A/G | 15q | A | 0.023809524 | 0.042056075 |
| rs2018462  | GOLGA6       | C/G | 15q | C | 0           | 0.008928571 |
| rs2020950  | PCSK6        | A/G | 15q | G | 0           | 0.008928571 |
| rs2073440  | HDC          | A/C | 15q | C | 0.004464286 | 0.035714286 |
| rs2076745  | ATP10A       | A/G | 15q | G | 0.013392857 | 0.013392857 |
| rs2236722  | CYP19A1      | C/T | 15q | C | 0           | 0.00462963  |

|           |                    |     |     |   |             |             |
|-----------|--------------------|-----|-----|---|-------------|-------------|
| rs2241647 | AVEN               | A/G | 15q | G | 0.035714286 | 0.022321429 |
| rs2277552 | NOX5               | C/T | 15q | T | 0           | 0           |
| rs2277553 | NOX5               | A/C | 15q | A | 0.004587156 | 0.009090909 |
| rs2277848 | ADAMTSL3           | A/G | 15q | A | 0           | 0           |
| rs2279683 | AGPAT7, NUT        | A/C | 15q | A | 0.032407407 | 0.077981651 |
| rs2279684 | AGPAT7, NUT        | C/G | 15q | G | 0.036036036 | 0.09009009  |
| rs2280217 | CALML4             | G/T | 15q | T | 0.008928571 | 0.013513514 |
| rs2289178 | CEP152             | A/C | 15q | A | 0           | 0           |
| rs2289181 | CEP152             | A/G | 15q | A | 0.008928571 | 0           |
| rs2289585 | FLJ42289           | A/C | 15q | A | 0.009009009 | 0.008928571 |
| rs2289741 | RPAP1              | C/T | 15q | T | 0.03125     | 0.040540541 |
| rs2291280 | MYO9A              | C/T | 15q | C | 0           | 0           |
| rs2291990 |                    | A/G | 15q | G | 0.05        | 0.058558559 |
| rs2292071 | EFTUD1             | C/T | 15q | C | 0.042857143 | 0.043478261 |
| rs2292628 | KIAA0574           | A/G | 15q | A | 0           | 0           |
| rs2304380 | RYR3               | A/G | 15q | G | 0           | 0.008928571 |
| rs2305710 | SCG3               | A/G | 15q | A | 0.044642857 | 0.044642857 |
| rs2306024 | ITGA11             | A/C | 15q | C | 0.049107143 | 0.054545455 |
| rs2307105 | EIF2AK4            | C/T | 15q | T | 0.031531532 | 0.03125     |
| rs2337127 |                    | A/C | 15q | C | 0.026785714 | 0.085585586 |
| rs2415129 | MYO9A              | C/T | 15q | C | 0.035714286 | 0.013392857 |
| rs2458862 | POTE15, LOC650770  | A/G | 15q | G | 0.004464286 | 0.004545455 |
| rs2525011 |                    | A/G | 15q | A | 0.010309278 | 0.005434783 |
| rs2679118 | CILP               | C/T | 15q | T | 0           | 0           |
| rs2727101 | DENND4A, LOC646358 | A/G | 15q | A | 0           | 0           |
| rs2727102 | DENND4A, LOC646358 | C/T | 15q | T | 0           | 0           |
| rs2856931 | PKM2               | C/G | 15q | C | 0           | 0           |
| rs374230  | NUT                | A/G | 15q | G | 0.008928571 | 0           |
| rs3743044 | USP8               | A/G | 15q | G | 0.036036036 | 0.026785714 |
| rs3743091 | NOX5, SPESP1       | G/T | 15q | T | 0.045454546 | 0.063636364 |
| rs3743235 | LOC283710          | A/G | 15q | A | 0.040178571 | 0.045045045 |
| rs3743279 | SEMA6D             | A/G | 15q | G | 0           | 0           |
| rs3743315 | UACA               | A/G | 15q | G | 0           | 0           |
| rs3751593 | LYSMD2             | C/T | 15q | C | 0           | 0           |
| rs3759875 | SPG11              | C/T | 15q | C | 0           | 0           |
| rs3784543 | TMED3              | A/G | 15q | A | 0           | 0           |
| rs3784588 | TRPM1              | C/T | 15q | T | 0.045454546 | 0.0625      |

|           |                      |     |     |   |             |             |
|-----------|----------------------|-----|-----|---|-------------|-------------|
| rs3803430 | ALDH1A3              | C/T | 15q | C | 0.022727273 | 0.017857143 |
| rs3803460 | RFXDC2               | C/G | 15q | C | 0.004504504 | 0.009174312 |
| rs3985641 | IQCH                 | C/G | 15q | G | 0           | 0           |
| rs4384572 | STARD5               | C/T | 15q | T | 0           | 0           |
| rs4777157 | LOC145837            | C/T | 15q | T | 0           | 0.013392857 |
| rs4780144 | RYR3                 | C/T | 15q | C | 0.035714286 | 0.049107143 |
| rs4886968 | LOC645752, LOC647988 | C/T | 15q | T | 0           | 0.004587156 |
| rs4920    | RAB11A               | G/T | 15q | T | 0           | 0.004545455 |
| rs495812  |                      | A/C | 15q | C | 0.022321429 | 0.017857143 |
| rs5745926 | NEIL1                | A/G | 15q | A | 0           | 0           |
| rs6495265 |                      | A/T | 15q | T | 0           | 0           |
| rs6496589 | PLIN                 | C/G | 15q | G | 0           | 0.004545455 |
| rs690346  | WDR72                | C/T | 15q | T | 0           | 0           |
| rs7164070 | AQR                  | C/T | 15q | C | 0.022727273 | 0.022522522 |
| rs7166441 | LOC390637            | A/G | 15q | A | 0           | 0           |
| rs7172758 | PRC1                 | G/T | 15q | G | 0.004464286 | 0.008928571 |
| rs7177092 | IREB2                | C/T | 15q | T | 0.004504505 | 0           |
| rs7178234 | LOC56964             | C/T | 15q | T | 0           | 0           |
| rs7178634 | NUSAP1               | A/G | 15q | G | 0           | 0           |
| rs7178777 | NUSAP1               | A/C | 15q | A | 0.009433962 | 0.023809524 |
| rs7180279 | CAPN3, GANC          | A/G | 15q | G | 0.045045045 | 0.042056075 |
| rs8025284 |                      | A/T | 15q | A | 0           | 0.00462963  |
| rs8026845 |                      | C/T | 15q | T | 0           | 0           |
| rs8026956 | VPS13C               | C/T | 15q | C | 0           | 0           |
| rs8027916 | MAP1A                | A/G | 15q | A | 0           | 0           |
| rs8029810 | AGBL1                | C/T | 15q | T | 0           | 0           |
| rs8030584 | SPTBN5               | G/T | 15q | G | 0           | 0           |
| rs8035438 |                      | A/G | 15q | A | 0.022321429 | 0.013636364 |
| rs8187754 |                      | G/T | 15q | T | 0.024752475 | 0.010752688 |
| rs871923  | CTDSPL2              | A/G | 15q | A | 0.00462963  | 0           |
| rs930871  | SENP8                | A/G | 15q | A | 0           | 0           |
| rs9328908 | LOC729722, LOC730465 | G/T | 15q | T | 0           | 0           |
| rs936212  | PLCB2                | A/G | 15q | G | 0           | 0.004504505 |
| rs9806123 | TIPIN                | C/G | 15q | C | 0           | 0           |
| rs1042008 | SULT1A1              | C/T | 16p | T | 0           | 0           |
| rs1042011 | SULT1A1              | C/G | 16p | C | 0           | 0           |
| rs1042014 | SULT1A1              | C/G | 16p | C | 0.004464286 | 0.004464286 |

|           |                 |     |     |   |             |             |
|-----------|-----------------|-----|-----|---|-------------|-------------|
| rs1043766 | MAZ             | A/C | 16p | A | 0           | 0           |
| rs1064524 | ITGAL           | C/T | 16p | T | 0.040178571 | 0.058035714 |
|           | PDXDC1, NTAN1,  |     |     |   |             |             |
| rs1135999 | LOC730455       | A/G | 16p | G | 0           | 0           |
| rs1218763 | OR2C1           | C/G | 16p | C | 0           | 0           |
| rs179196  | LOC728276       | G/T | 16p | G | 0.045045045 | 0.063063063 |
| rs1799802 | ERCC4           | C/T | 16p | T | 0           | 0.004464286 |
| rs1800068 | ERCC4           | C/G | 16p | C | 0           | 0           |
| rs1800069 | ERCC4           | C/T | 16p | C | 0.004464286 | 0.004504504 |
| rs1800124 | ERCC4           | A/G | 16p | G | 0.017857143 | 0.004464286 |
| rs1963017 |                 | C/T | 16p | T | 0.004504505 | 0           |
| rs1991020 |                 | C/T | 16p | T | 0           | 0.013513514 |
| rs2020957 | ERCC4           | A/G | 16p | G | 0.008928571 | 0           |
| rs2020959 | ERCC4           | A/C | 16p | A | 0           | 0           |
| rs2020961 | ERCC4           | C/T | 16p | T | 0           | 0           |
| rs2032917 | ZNF668          | C/G | 16p | G | 0.009090909 | 0           |
| rs2072086 | MIR16           | C/T | 16p | T | 0           | 0           |
| rs2301770 | ACSM3, EXOD1    | C/T | 16p | T | 0.03125     | 0.035714286 |
| rs235636  | ZG16            | A/G | 16p | G | 0.017857143 | 0.009009009 |
| rs235638  | ZG16, LOC653808 | C/G | 16p | G | 0.018018018 | 0           |
| rs257878  |                 | A/G | 16p | A | 0.018018018 | 0.018348624 |
| rs2734742 | PPL             | A/C | 16p | A | 0           | 0.004464286 |
| rs2791    | DNASE1, TRAP1   | C/T | 16p | T | 0.026785714 | 0.03125     |
| rs369322  | RPL23AP5        | A/G | 16p | A | 0.022522522 | 0.026785714 |
| rs373496  | TNFRSF17        | C/T | 16p | T | 0.008928571 | 0.004504505 |
| rs3743695 | DNAH3           | C/T | 16p | T | 0           | 0           |
| rs3743808 | PMM2            | C/T | 16p | C | 0           | 0           |
| rs3764944 | MVP             | C/T | 16p | T | 0           | 0           |
| rs3850114 | ZNF267          | C/T | 16p | C | 0.035714286 | 0.026785714 |
| rs4986933 | ERCC4           | A/C | 16p | A | 0           | 0           |
| rs4997782 |                 | G/T | 16p | T | 0.004464286 | 0.004464286 |
| rs4997783 |                 | A/G | 16p | G | 0           | 0           |
| rs5713    | ACSM3           | C/T | 16p | C | 0.017857143 | 0.013392857 |
| rs6413500 | IL4R            | C/T | 16p | T | 0.004504505 | 0.004464286 |
| rs6416668 | ABCC6           | C/T | 16p | T | 0           | 0           |
| rs6497795 | LOC646939       | C/T | 16p | T | 0           | 0           |
| rs6497797 | LOC646939       | A/G | 16p | A | 0           | 0           |



|            |                     |     |     |   |             |             |
|------------|---------------------|-----|-----|---|-------------|-------------|
| rs7185611  |                     | C/T | 16p | C | 0.013513513 | 0.04587156  |
| rs7192210  | FLJ20581, LOC647786 | A/G | 16p | A | 0.004464286 | 0.008928571 |
| rs7195194  | NSMCE1              | C/G | 16p | C | 0.026785714 | 0.013513513 |
| rs7195763  | LOC342346           | C/G | 16p | G | 0.026785714 | 0.040178571 |
| rs7197779  | CIITA               | A/G | 16p | A | 0.004464286 | 0.004464286 |
| rs7200466  | XYLT1               | C/T | 16p | T | 0.004464286 | 0           |
| rs7200749  | VKORC1              | A/G | 16p | A | 0.004464286 | 0           |
| rs7203139  | LOC646939           | G/T | 16p | G | 0           | 0           |
| rs7203960  | LOC646939           | A/G | 16p | G | 0           | 0           |
| rs762792   | LOC92017            | A/C | 16p | C | 0.004504505 | 0.004464286 |
| rs8048992  |                     | A/C | 16p | A | 0           | 0           |
| rs8054402  |                     | A/G | 16p | G | 0.008928571 | 0           |
| rs8055762  | LOC730809           | A/G | 16p | A | 0.031531531 | 0.049107143 |
| rs8056709  | ACSM1               | C/T | 16p | C | 0           | 0           |
| rs8176919  | DNASE1, TRAP1       | A/G | 16p | A | 0.004464286 | 0.004464286 |
| rs8176928  | DNASE1, TRAP1       | A/G | 16p | G | 0           | 0           |
| rs929867   | FUS                 | C/T | 16p | T | 0.004464286 | 0           |
| rs9928967  | CORO7               | C/T | 16p | T | 0           | 0           |
| rs9931441  | ATF7IP2             | A/G | 16p | A | 0.026785714 | 0.022321429 |
| rs9932051  | ATF7IP2             | C/T | 16p | T | 0.027027027 | 0.022321429 |
| rs10500557 | ZNF19               | C/T | 16q | T | 0.013513514 | 0.017857143 |
| rs1065360  | HPR                 | C/T | 16q | C | 0.031818182 | 0.035714286 |
| rs11641963 |                     | C/G | 16q | G | 0.03125     | 0.040178571 |
| rs11860946 | CES7                | C/G | 16q | C | 0.009090909 | 0           |
| rs11862663 |                     | C/G | 16q | G | 0           | 0.004464286 |
| rs1453325  | PKD1L2              | A/G | 16q | A | 0           | 0           |
| rs1529927  | SLC12A3             | C/G | 16q | C | 0.040178571 | 0.040178571 |
| rs1798531  |                     | G/T | 16q | G | 0.004464286 | 0.004464286 |
| rs2021171  | HPR                 | A/G | 16q | A | 0.03125     | 0.035714286 |
| rs2066845  | NOD2                | C/G | 16q | C | 0.008928571 | 0.008928571 |
| rs2066852  | CYLD                | C/T | 16q | T | 0.049107143 | 0.066964286 |
| rs2099104  | SPG7                | A/T | 16q | A | 0           | 0           |
| rs2271023  | CDH16               | A/G | 16q | A | 0.017857143 | 0.0625      |
| rs2276331  | CDH1                | C/G | 16q | C | 0           | 0           |
| rs2290901  | FAM38A              | A/G | 16q | A | 0.004504504 | 0           |
| rs2292329  | EFCBP2              | C/G | 16q | C | 0.008928571 | 0.013636364 |
| rs2303203  | KIAA0182            | A/G | 16q | A | 0           | 0           |

|           |               |     |     |   |             |             |
|-----------|---------------|-----|-----|---|-------------|-------------|
| rs2549087 | LOC651987     | A/C | 16q | C | 0           | 0           |
| rs2549280 | LOC651987     | A/T | 16q | A | 0           | 0           |
| rs2650406 | LOC645799     | C/G | 16q | G | 0.03125     | 0.022321429 |
| rs2908780 |               | C/T | 16q | T | 0.022522523 | 0.017857143 |
| rs3096380 | FLJ11171      | C/T | 16q | C | 0.027027027 | 0.04054054  |
| rs363212  | APPBP1        | A/G | 16q | A | 0           | 0           |
| rs3748384 |               | C/T | 16q | T | 0           | 0           |
| rs3751727 | KLHDC4        | C/G | 16q | C | 0.022321429 | 0.022522522 |
| rs3764340 | WVOX          | C/G | 16q | G | 0.040540541 | 0.084821429 |
| rs3764341 | WVOX          | C/G | 16q | G | 0           | 0           |
| rs3812955 | ZNF469        | C/T | 16q | T | 0.004587156 | 0.009090909 |
| rs3826201 | PRDM7         | A/G | 16q | A | 0.03960396  | 0.0625      |
| rs3848290 | FLJ37464      | C/T | 16q | T | 0           | 0.004464286 |
| rs4150187 | TAF1C, LRRC50 | C/G | 16q | C | 0           | 0           |
| rs4238741 | SMPD3         | C/G | 16q | C | 0           | 0           |
| rs431818  | KIAA1609      | C/T | 16q | T | 0.008928571 | 0.013392857 |
| rs4782591 | TAF1C         | C/T | 16q | C | 0           | 0           |
| rs4784677 | BBS2          | C/T | 16q | C | 0.004901961 | 0.005319149 |
| rs4986970 | LCAT, SLC12A4 | A/T | 16q | A | 0.026785714 | 0.022321429 |
| rs4986998 | NQO1          | C/T | 16q | T | 0.031818182 | 0.053571429 |
| rs507329  | CDT1          | C/T | 16q | T | 0           | 0           |
| rs5559    | SLC6A2        | C/T | 16q | C | 0           | 0           |
| rs5566    | SLC6A2        | C/G | 16q | C | 0           | 0           |
| rs5567    | SLC6A2        | A/G | 16q | G | 0.004464286 | 0           |
| rs5880    | CETP          | C/G | 16q | C | 0.040178571 | 0.041666667 |
| rs6499499 |               | A/G | 16q | G | 0           | 0           |
| rs6500305 | ABCC12        | A/T | 16q | A | 0           | 0           |
| rs6564343 | CNTNAP4       | C/G | 16q | C | 0           | 0           |
| rs6564956 | HSPC105       | C/G | 16q | G | 0.004545455 | 0.013513514 |
| rs666636  | MT4           | A/G | 16q | A | 0.013392857 | 0.017857143 |
| rs7184178 |               | C/T | 16q | T | 0           | 0.004464286 |
| rs7189165 |               | C/G | 16q | C | 0           | 0.004464286 |
| rs7192188 | LOC123855     | C/T | 16q | T | 0           | 0           |
| rs7198138 |               | G/T | 16q | T | 0.03125     | 0.049107143 |
| rs7198865 | ARL2BP        | A/G | 16q | A | 0.026785714 | 0.040178571 |
| rs7200485 | HYDIN         | C/G | 16q | G | 0.004464286 | 0           |
| rs7201683 | WVOX          | C/G | 16q | G | 0.004464286 | 0.018018018 |

|            |                        |     |     |   |             |             |
|------------|------------------------|-----|-----|---|-------------|-------------|
| rs7206111  | PRDM7                  | G/T | 16q | T | 0.045454546 | 0.053571429 |
| rs745211   | PKD1L2                 | A/C | 16q | A | 0           | 0           |
| rs783732   |                        | A/G | 16q | A | 0           | 0.008928571 |
| rs8046813  | KIAA1609               | A/C | 16q | A | 0           | 0           |
| rs8052655  | LRRC36                 | A/G | 16q | A | 0.049549549 | 0.084821429 |
| rs8053883  | COG4                   | C/T | 16q | T | 0           | 0           |
| rs8055536  | KIAA1609               | C/G | 16q | C | 0.027272727 | 0.018018018 |
| rs8057309  |                        | A/G | 16q | G | 0           | 0           |
| rs8191136  | HSD17B2                | A/G | 16q | A | 0           | 0           |
| rs9354     | COX4NB                 | C/T | 16q | T | 0           | 0.004464286 |
| rs9673318  |                        | C/T | 16q | T | 0           | 0.008928571 |
| rs9925352  |                        | C/T | 16q | T | 0.004464286 | 0.004504505 |
| rs9939768  | EXOC3L                 | C/G | 16q | C | 0.044642857 | 0.080357143 |
| rs1017522  |                        | A/C | 17p | C | 0.026785714 | 0.022522523 |
| rs10512421 |                        | A/G | 17p | A | 0.009090909 | 0.023148148 |
| rs1063926  | MYH8                   | A/G | 17p | G | 0           | 0           |
| rs11657747 | NLRP1                  | A/G | 17p | A | 0.049549549 | 0.077272727 |
| rs150122   | ULK2                   | A/G | 17p | G | 0.013513514 | 0.045045045 |
| rs1735011  | OR1E1                  | A/G | 17p | A | 0           | 0           |
| rs1806230  | NUP88                  | A/G | 17p | A | 0           | 0           |
| rs1889019  | RAI1                   | C/G | 17p | C | 0           | 0           |
| rs2304974  | PSMB6                  | C/G | 17p | G | 0.04245283  | 0.045454546 |
| rs2309808  | DNAH2                  | A/G | 17p | A | 0           | 0           |
| rs3205089  | NCOR1                  | A/T | 17p | T | 0           | 0           |
| rs3213688  | RICH2                  | C/T | 17p | T | 0           | 0           |
| rs3736433  | XAF1                   | A/C | 17p | A | 0           | 0           |
| rs3744117  | PEMT                   | A/G | 17p | A | 0           | 0           |
| rs3744128  | M-RIP                  | C/T | 17p | T | 0           | 0.004464286 |
| rs3744254  | DNAH2                  | A/T | 17p | T | 0           | 0           |
| rs3744558  | MYH4                   | A/G | 17p | A | 0.004464286 | 0.004464286 |
| rs3744564  | MYH1                   | A/G | 17p | A | 0           | 0           |
| rs3744679  | ITGAE                  | C/G | 17p | C | 0.044642857 | 0.077272727 |
| rs3813768  | TRPV2                  | C/G | 17p | G | 0           | 0           |
| rs4491591  | POLR2A, ZBTB4, AMAC1L3 | A/G | 17p | G | 0.004464286 | 0           |
| rs4605228  | MGC87631               | C/T | 17p | C | 0.008928571 | 0.004464286 |
| rs6068     | GP1BA                  | A/G | 17p | A | 0           | 0           |

|            |              |     |     |   |             |             |
|------------|--------------|-----|-----|---|-------------|-------------|
| rs6258     | SHBG         | C/T | 17p | T | 0.009009009 | 0.004464286 |
| rs6260     | SHBG         | A/G | 17p | A | 0           | 0           |
| rs6502446  | TEKT3        | A/G | 17p | G | 0.004464286 | 0           |
| rs6587220  | EPN2         | C/T | 17p | T | 0.004504505 | 0.009090909 |
| rs8072629  |              | A/G | 17p | G | 0.008928571 | 0           |
| rs9892256  | DNAH9        | A/G | 17p | A | 0           | 0           |
| rs9916524  | SMTNL2       | C/T | 17p | C | 0.004464286 | 0.008928571 |
| rs1017089  | HSF5         | G/T | 17q | T | 0           | 0           |
| rs10491178 | ABCA10       | C/T | 17q | T | 0.040178571 | 0.044642857 |
| rs1049416  | SEC14L1      | A/G | 17q | A | 0           | 0           |
| rs1049807  | CCL4         | A/G | 17q | G | 0.018018018 | 0.028037383 |
| rs10512599 | ICT1         | C/G | 17q | G | 0.004504505 | 0           |
| rs1064116  | STAT3        | A/T | 17q | A | 0           | 0           |
| rs1111168  | KRT32        | C/G | 17q | C | 0           | 0           |
| rs11568588 |              | C/T | 17q | T | 0           | 0           |
| rs11653020 | HELZ         | A/G | 17q | G | 0.045045045 | 0.0625      |
| rs12383    | ABCA5        | G/T | 17q | T | 0           | 0           |
| rs1471615  | NLE1         | C/G | 17q | C | 0.026785714 | 0.017857143 |
| rs1719152  | CCL4         | A/T | 17q | A | 0           | 0.004716981 |
| rs1990936  |              | C/T | 17q | T | 0.045454546 | 0.041284404 |
| rs2071560  | KRT32        | C/T | 17q | C | 0.004464286 | 0           |
| rs2074160  | DHX58        | A/G | 17q | A | 0.031818182 | 0.036363636 |
| rs2227723  | VTN          | A/G | 17q | A | 0.004464286 | 0           |
| rs2227945  | BRCA1        | A/G | 17q | G | 0           | 0           |
| rs2230770  | AKAP1        | A/G | 17q | A | 0.031531531 | 0.037037037 |
| rs2233369  | ABI3         | A/G | 17q | A | 0.03125     | 0.071428571 |
| rs2270716  | SDK2         | C/G | 17q | C | 0.031531531 | 0.035714286 |
| rs2277619  | STAT5B       | C/T | 17q | T | 0           | 0           |
| rs2286677  | CACNG5       | A/G | 17q | A | 0           | 0.004504504 |
| rs2289541  | CARD14       | A/G | 17q | A | 0           | 0.004464286 |
| rs2290041  | WNK4         | A/G | 17q | A | 0           | 0.004464286 |
| rs2290566  | HRNBP3       | A/G | 17q | A | 0.044642857 | 0.054054054 |
| rs2292754  | MLX, PSMC3IP | A/T | 17q | A | 0           | 0.004464286 |
| rs2302311  | EPX          | A/T | 17q | T | 0.013392857 | 0.004464286 |
| rs2303015  | CALCOCO2     | A/G | 17q | G | 0.040909091 | 0.044642857 |
| rs2306512  | NLE1         | C/T | 17q | T | 0           | 0           |
| rs2306513  | NLE1         | A/G | 17q | G | 0           | 0           |

|           |                      |     |     |   |             |             |
|-----------|----------------------|-----|-----|---|-------------|-------------|
| rs2458039 | LOC644397            | A/G | 17q | G | 0           | 0           |
| rs2531902 |                      | A/G | 17q | A | 0           | 0           |
| rs2643103 | BCAS3                | A/G | 17q | A | 0.004504504 | 0.013513513 |
| rs28963   | SPACA3               | C/T | 17q | C | 0           | 0.004464286 |
| rs3087878 | NMT1                 | G/T | 17q | T | 0           | 0           |
| rs3136677 | CCL13                | G/T | 17q | T | 0           | 0           |
| rs366700  | KRTAP4-4             | C/G | 17q | C | 0           | 0           |
| rs3744032 | ACOX1                | C/T | 17q | T | 0.044642857 | 0.054054054 |
| rs3744795 | USP36                | A/G | 17q | G | 0.026785714 | 0.03125     |
| rs3815057 |                      | A/G | 17q | G | 0.013392857 | 0.022321429 |
| rs4135012 | CDC6                 | A/G | 17q | A | 0.026785714 | 0.013392857 |
| rs4318    | ACE                  | A/G | 17q | G | 0           | 0           |
| rs4399578 | GPR179               | C/G | 17q | G | 0           | 0           |
| rs4796077 | SLFN11               | C/T | 17q | T | 0.022727273 | 0.026785714 |
| rs4986848 | BRCA1                | C/T | 17q | C | 0           | 0           |
| rs4986854 | BRCA1                | C/T | 17q | C | 0           | 0.004504504 |
| rs4988345 | BRIP1                | C/T | 17q | T | 0.004504505 | 0.008928571 |
| rs5022    | SLC4A1               | A/G | 17q | G | 0           | 0           |
| rs5915    | ITGA2B               | C/T | 17q | T | 0           | 0           |
| rs5917    | ITGB3                | A/G | 17q | A | 0           | 0.004504504 |
| rs606072  | INTS2                | A/C | 17q | A | 0           | 0           |
| rs634312  | FLJ40194             | C/T | 17q | C | 0           | 0           |
| rs6352    | SLC6A4               | A/C | 17q | C | 0           | 0           |
| rs6355    | SLC6A4               | C/G | 17q | C | 0.017857143 | 0.008928571 |
| rs6503594 | KRTAP4-8, LOC728224  | A/G | 17q | G | 0.004587156 | 0.009090909 |
| rs6504233 | POLG2                | A/G | 17q | G | 0.026785714 | 0.066964286 |
| rs6504255 | LOC440456            | C/T | 17q | T | 0           | 0           |
| rs6505140 | SSH2                 | A/G | 17q | G | 0           | 0           |
| rs6505228 | LOC646030, LOC646037 | A/G | 17q | G | 0.013392857 | 0.013392857 |
| rs673918  | SEC14L1              | A/C | 17q | A | 0           | 0           |
| rs7342870 | NFE2L3, C17orf57     | A/T | 17q | T | 0           | 0           |
| rs7350908 | CDC27                | A/G | 17q | A | 0           | 0           |
| rs7350974 | SCRN2                | C/T | 17q | T | 0.008928571 | 0.013392857 |
| rs741902  | GPATCH8              | A/G | 17q | A | 0           | 0           |
| rs8073475 | FLJ35848             | A/T | 17q | T | 0.008928571 | 0.040178571 |
| rs8178318 | LPO                  | C/T | 17q | T | 0           | 0           |
| rs854625  | CCL15                | A/G | 17q | A | 0.031818182 | 0.018018018 |

|            |               |     |     |   |             |             |
|------------|---------------|-----|-----|---|-------------|-------------|
| rs897420   | KRT15         | C/G | 17q | G | 0           | 0           |
| rs9893420  | PHB           | A/G | 17q | G | 0.009090909 | 0           |
| rs9896965  | SPAG9         | C/T | 17q | C | 0.004504504 | 0           |
| rs9907075  |               | A/G | 17q | A | 0.004504504 | 0           |
| rs1044190  | VAPA          | C/T | 18p | C | 0           | 0           |
| rs1045142  | ROCK1         | A/G | 18p | A | 0           | 0           |
| rs11080623 | CEP192        | A/C | 18p | C | 0.026785714 | 0.026785714 |
| rs1848894  |               | A/G | 18p | G | 0.008928571 | 0.004504505 |
| rs2298546  | ANKRD12       | C/T | 18p | T | 0.013513514 | 0.031818182 |
| rs2305370  | NAPG          | C/G | 18p | G | 0           | 0           |
| rs3737379  | CEP192        | C/T | 18p | C | 0.03125     | 0.017857143 |
| rs543355   | LAMA1         | C/T | 18p | C | 0.018181818 | 0.009009009 |
| rs6506448  | ARHGAP28      | C/G | 18p | G | 0           | 0.008928571 |
| rs7235740  | ZFP161        | C/T | 18p | C | 0           | 0           |
| rs786064   | C15orf33      | A/C | 18p | C | 0.009090909 | 0.013392857 |
| rs8083854  | LOC284230     | C/T | 18p | T | 0.040178571 | 0.013392857 |
| rs8091736  |               | C/T | 18p | T | 0.004464286 | 0           |
| rs8093421  |               | C/T | 18p | T | 0.004464286 | 0           |
| rs8096452  | EPB41L3       | C/G | 18p | G | 0.004504505 | 0.013761468 |
| rs9748611  | ANKRD30B      | A/G | 18p | A | 0.004807692 | 0.009708738 |
| rs1042755  | DSG1          | A/G | 18q | A | 0           | 0           |
| rs1044128  | ELP2          | A/C | 18q | C | 0           | 0           |
| rs1044134  | ELP2          | A/C | 18q | C | 0           | 0           |
| rs1062236  | ZNF397        | A/T | 18q | A | 0           | 0           |
| rs11081992 | BRUNOL4       | G/T | 18q | T | 0.004464286 | 0           |
| rs11151367 |               | C/T | 18q | T | 0           | 0           |
| rs1380866  | DSG3          | A/G | 18q | A | 0.00462963  | 0.015151515 |
| rs1789528  | SLC39A6       | C/G | 18q | G | 0           | 0           |
| rs1805084  | NPC1, C18orf8 | A/G | 18q | A | 0.044642857 | 0.045045045 |
| rs1815930  | MYO5B         | A/G | 18q | A | 0           | 0           |
| rs1942418  | MYO5B         | A/G | 18q | A | 0.049107143 | 0.054545454 |
| rs2229616  | MC4R          | A/G | 18q | A | 0.022321429 | 0           |
| rs2230235  | DSG2          | A/G | 18q | A | 0           | 0           |
| rs2276211  | ZNF236        | A/G | 18q | A | 0.023148148 | 0.051401869 |
| rs2289664  | CDH2          | C/T | 18q | C | 0.009009009 | 0.022321429 |
| rs3087769  | IER3IP1       | A/G | 18q | G | 0           | 0           |
| rs3218784  | POLI          | A/G | 18q | G | 0.026785714 | 0.03125     |

|            |               |     |     |   |             |             |
|------------|---------------|-----|-----|---|-------------|-------------|
| rs3218786  | POLI          | C/T | 18q | C | 0.03125     | 0.040909091 |
| rs3737512  | C18orf55      | A/G | 18q | A | 0.03125     | 0.075892857 |
| rs3744921  | FAM59A        | A/G | 18q | G | 0.013392857 | 0           |
| rs3745078  | ATP8B1        | C/T | 18q | C | 0           | 0           |
| rs3745079  | ATP8B1        | C/G | 18q | G | 0           | 0           |
| rs3794873  | ZNF236        | C/T | 18q | C | 0.017857143 | 0.026785714 |
| rs3809974  | ALPK2         | C/T | 18q | T | 0.013392857 | 0.026785714 |
| rs3809975  | ALPK2         | C/G | 18q | C | 0.022321429 | 0.035714286 |
| rs3826593  | ALPK2         | C/T | 18q | C | 0.049107143 | 0.103603604 |
| rs466113   | C18orf34      | A/G | 18q | G | 0           | 0           |
| rs4799213  |               | A/G | 18q | G | 0.036036036 | 0.071428571 |
| rs4891392  | RTTN          | A/G | 18q | A | 0.049107143 | 0.0625      |
| rs5376     | GALR1         | C/T | 18q | C | 0.004464286 | 0.004464286 |
| rs5377     | GALR1         | C/T | 18q | T | 0           | 0           |
| rs540967   | MOCOS         | A/G | 18q | A | 0           | 0           |
| rs576180   | LOC284288     | A/G | 18q | A | 0.022321429 | 0.008928571 |
| rs6100     | SERPINB2      | A/G | 18q | A | 0           | 0           |
| rs6506860  |               | C/T | 18q | C | 0           | 0           |
| rs6506953  |               | A/G | 18q | A | 0.004464286 | 0           |
| rs6507617  |               | A/G | 18q | G | 0.004504505 | 0           |
| rs6507833  |               | C/T | 18q | C | 0.035714286 | 0.03125     |
| rs671138   | FAM59A        | G/T | 18q | T | 0           | 0           |
| rs7226809  |               | G/T | 18q | T | 0.013513514 | 0.026785714 |
| rs7229252  | DSG4          | C/T | 18q | C | 0           | 0           |
| rs922999   | NETO1         | C/T | 18q | C | 0           | 0           |
| rs984274   | DCC           | C/T | 18q | C | 0           | 0           |
| rs9951523  | DCC           | C/T | 18q | T | 0.02293578  | 0.009090909 |
| rs9963788  | CCDC102B      | C/G | 18q | C | 0.017857143 | 0.013513513 |
| rs10404860 | SFRS14        | A/G | 19p | G | 0           | 0           |
| rs10406428 |               | C/T | 19p | C | 0           | 0           |
| rs10417513 |               | A/G | 19p | A | 0           | 0.004464286 |
| rs10419928 |               | C/T | 19p | T | 0           | 0.004464286 |
| rs10421121 | ZNF556        | C/T | 19p | T | 0.044642857 | 0.058035714 |
| rs10422514 | FSTL3, PRSSL1 | A/T | 19p | T | 0.009345794 | 0.00462963  |
| rs10422576 |               | A/G | 19p | A | 0           | 0           |
| rs10425108 | DHPS          | C/G | 19p | G | 0           | 0           |
| rs10500210 | ZNF442        | A/G | 19p | A | 0           | 0.004464286 |

|            |                 |     |     |   |             |             |
|------------|-----------------|-----|-----|---|-------------|-------------|
| rs1059199  | ZNF562          | A/G | 19p | A | 0           | 0           |
| rs1063156  | ZNF85           | A/G | 19p | G | 0           | 0           |
| rs11085808 | ZNF442          | C/T | 19p | T | 0           | 0           |
| rs12003    | GMIP            | C/T | 19p | T | 0.035714286 | 0.040540541 |
| rs12459404 | POLR2E          | A/G | 19p | G | 0           | 0           |
| rs12609268 | ZNF77           | C/T | 19p | C | 0           | 0           |
| rs1438694  |                 | A/T | 19p | T | 0           | 0           |
| rs1541923  | LOC55908, DOCK6 | A/G | 19p | G | 0           | 0           |
| rs1544766  | CD209           | A/G | 19p | G | 0           | 0           |
| rs1613462  | LOC284428       | G/T | 19p | T | 0.004854369 | 0           |
| rs1802498  | RFXANK, TRA16   | C/G | 19p | G | 0           | 0           |
| rs1806931  | OR10H2          | A/G | 19p | A | 0.049107143 | 0.086363636 |
| rs1866382  |                 | C/G | 19p | C | 0.026785714 | 0.04054054  |
| rs2042266  |                 | C/T | 19p | T | 0           | 0           |
| rs2277738  | TLE6            | A/G | 19p | A | 0.008928571 | 0.004464286 |
| rs2278287  | THEG            | C/T | 19p | T | 0           | 0.004464286 |
| rs2287803  | COL5A3          | A/G | 19p | A | 0.022522522 | 0.044642857 |
| rs2291667  | TNFSF14         | C/T | 19p | T | 0           | 0           |
| rs2302306  | TJP3            | A/G | 19p | A | 0           | 0           |
| rs2305376  | HOOK2           | C/T | 19p | T | 0           | 0           |
| rs2438586  | LOC730651       | C/G | 19p | G | 0           | 0           |
| rs2608737  | NWD1            | A/T | 19p | A | 0           | 0           |
| rs2608738  | NWD1            | A/G | 19p | G | 0.049107143 | 0.040178571 |
| rs265282   |                 | C/G | 19p | C | 0.037735849 | 0.033333333 |
| rs2914553  |                 | A/G | 19p | A | 0           | 0           |
| rs3209058  | ZNF626          | A/C | 19p | C | 0           | 0           |
| rs3213409  | JAK3            | A/G | 19p | A | 0.017857143 | 0.013513513 |
| rs352493   | SIRT6           | C/T | 19p | C | 0.049107143 | 0.044642857 |
| rs3745193  | GTPBP3          | A/G | 19p | A | 0.013392857 | 0.022522522 |
| rs3745581  | COL5A3          | C/G | 19p | C | 0.013513513 | 0.009090909 |
| rs3752187  | EMR2            | A/G | 19p | A | 0.009009009 | 0.013513513 |
| rs3885179  | ZNF333          | G/T | 19p | T | 0.03125     | 0.017857143 |
| rs414528   | USE1            | A/G | 19p | A | 0           | 0           |
| rs4804271  | FBN3            | C/T | 19p | C | 0           | 0.004464286 |
| rs4808209  | ZNF101          | A/C | 19p | C | 0.040540541 | 0.066964286 |
| rs4987202  | RAD23A          | C/T | 19p | T | 0.008928571 | 0.017857143 |
| rs5491     | ICAM1           | A/T | 19p | T | 0.004464286 | 0.004464286 |



|            |                   |     |     |   |             |             |
|------------|-------------------|-----|-----|---|-------------|-------------|
| rs5497     | ICAM1             | A/G | 19p | A | 0           | 0           |
| rs6511379  | ZNF99             | G/T | 19p | G | 0.022321429 | 0.013636364 |
| rs706764   | NWD1              | C/T | 19p | C | 0           | 0           |
| rs7247284  | RNASEH2A          | C/T | 19p | C | 0.026785714 | 0.049107143 |
| rs7249689  |                   | C/G | 19p | C | 0.018518518 | 0.032110092 |
| rs7250822  | JSRP1             | C/G | 19p | G | 0.027027027 | 0.017857143 |
| rs7251081  | LRG1              | C/T | 19p | T | 0           | 0.004464286 |
| rs7254529  | ZNF763, LOC729745 | C/T | 19p | C | 0.013392857 | 0.026785714 |
| rs8108188  | SLC5A5            | G/T | 19p | G | 0           | 0           |
| rs8108563  | LOC401898         | C/G | 19p | G | 0           | 0           |
| rs8108981  | PBX4              | C/T | 19p | C | 0           | 0           |
| rs8113325  | OR7C2             | C/T | 19p | T | 0           | 0           |
| rs916019   | JAK3              | C/T | 19p | C | 0           | 0           |
| rs10403702 | LOC148003         | C/T | 19q | C | 0           | 0.004464286 |
| rs10407547 | ZNF577            | C/T | 19q | T | 0.017857143 | 0.009090909 |
| rs10409482 | VRK3              | C/T | 19q | T | 0           | 0.004464286 |
| rs10414030 | ZNF331            | A/G | 19q | A | 0.017857143 | 0.008928571 |
| rs10416460 |                   | C/G | 19q | G | 0.035714286 | 0.063063063 |
| rs10419876 | ZNF473            | A/G | 19q | G | 0           | 0.009009009 |
| rs10422147 | FLJ26850          | A/G | 19q | A | 0           | 0.009009009 |
| rs1042401  | GLTSCR2           | A/C | 19q | A | 0           | 0           |
| rs1044565  | UBE2M, CHMP2A     | A/G | 19q | G | 0           | 0           |
| rs1058402  | PVR               | A/G | 19q | A | 0.045454545 | 0.040909091 |
| rs1060877  | ZNF230            | C/G | 19q | G | 0           | 0           |
| rs1063126  | SEPW1             | C/G | 19q | C | 0.004504504 | 0           |
| rs10869    | SYNGR4            | C/T | 19q | C | 0           | 0           |
| rs1130480  | KIR2DS4           | A/T | 19q | T | 0           | 0           |
| rs1130504  | KIR2DS4           | A/C | 19q | A | 0.014150943 | 0.027027027 |
| rs11564534 | PLA2G4C           | G/T | 19q | T | 0.004672897 | 0.009708738 |
| rs11569681 | SULT2A1           | C/G | 19q | C | 0           | 0.004464286 |
| rs1227794  | ZNF790            | A/G | 19q | A | 0.005154639 | 0.010204082 |
| rs12460501 | LILRB1            | A/G | 19q | A | 0           | 0.009009009 |
| rs12610019 | ZNF667            | C/T | 19q | C | 0           | 0           |
| rs1433083  | ZNF649            | C/T | 19q | T | 0.008928571 | 0.022321429 |
| rs1545040  | EML2              | G/T | 19q | T | 0.03125     | 0.017857143 |
| rs1549928  |                   | A/G | 19q | G | 0.004464286 | 0.004504505 |
| rs1626153  |                   | C/G | 19q | C | 0.049107143 | 0.049549549 |

|           |              |     |     |   |             |             |
|-----------|--------------|-----|-----|---|-------------|-------------|
| rs1657509 | ZNF585B      | C/T | 19q | T | 0           | 0           |
| rs1675404 | BLVRB        | C/T | 19q | T | 0           | 0           |
| rs1697558 |              | C/T | 19q | C | 0.008928571 | 0.013392857 |
| rs1799791 | ERCC2        | C/G | 19q | G | 0           | 0           |
| rs1799792 | ERCC2        | C/T | 19q | T | 0           | 0           |
| rs1834698 | LILRA2       | G/T | 19q | T | 0           | 0           |
| rs1860134 | LOC148003    | A/T | 19q | T | 0           | 0           |
| rs1962626 | LOC729111    | A/C | 19q | C | 0.018867925 | 0.004950495 |
| rs200658  | SIGLEC9      | A/G | 19q | A | 0.004545454 | 0           |
| rs2033262 | VRK3         | A/G | 19q | A | 0           | 0.009009009 |
| rs2034891 | SIGLEC12     | G/T | 19q | T | 0.044642857 | 0.013392857 |
| rs203710  | PVR          | A/G | 19q | A | 0.027027027 | 0.008928571 |
| rs2071699 | FUT1         | C/T | 19q | T | 0.022321429 | 0.04954955  |
| rs2111544 | ZNF546       | C/T | 19q | T | 0.026785714 | 0.0625      |
| rs2191432 | PEG3, ZIM2   | C/T | 19q | T | 0           | 0           |
| rs2228278 | ZNF135       | A/G | 19q | G | 0           | 0           |
| rs2228280 | ZNF135       | C/T | 19q | T | 0           | 0           |
| rs2274896 | LSM14A       | C/T | 19q | T | 0           | 0           |
| rs2288420 | PTPRH        | A/G | 19q | G | 0.035714286 | 0.03125     |
| rs2301596 | KIAA0841     | C/T | 19q | T | 0           | 0           |
| rs2304103 | C19orf40     | C/T | 19q | T | 0.045045045 | 0.054545455 |
| rs2304211 | MEGF8        | A/G | 19q | A | 0.004504504 | 0           |
| rs2307184 | XRCC1        | A/C | 19q | A | 0           | 0           |
| rs2307282 | PLA2G4C      | A/G | 19q | G | 0           | 0.004464286 |
| rs270771  |              | C/T | 19q | T | 0.035714286 | 0.053571429 |
| rs273690  | SIGLEC9      | C/T | 19q | C | 0.004464286 | 0           |
| rs2909097 | ZNF607       | A/C | 19q | A | 0           | 0           |
| rs2921563 | HKR1         | A/G | 19q | A | 0.013392857 | 0.040178571 |
| rs3208212 | ZNF224       | A/G | 19q | G | 0           | 0           |
| rs3208856 | CBLC         | C/T | 19q | T | 0.040178571 | 0.013392857 |
| rs3212844 | KLK1         | C/T | 19q | C | 0.026785714 | 0.044642857 |
| rs3731003 | LIG1         | C/T | 19q | T | 0           | 0           |
| rs3739186 | PNKP         | A/T | 19q | A | 0           | 0.004464286 |
| rs3745226 | ZNF574       | A/G | 19q | A | 0           | 0           |
| rs3745489 | NUP62, IL411 | C/T | 19q | T | 0.017857143 | 0.004464286 |
| rs3745498 | C19orf41     | A/G | 19q | A | 0           | 0           |
| rs3745962 | FAM98C       | A/C | 19q | A | 0.017857143 | 0.017857143 |

|           |                   |     |     |   |             |             |
|-----------|-------------------|-----|-----|---|-------------|-------------|
| rs3752179 | ZNF470            | A/G | 19q | G | 0.013392857 | 0           |
| rs3786490 | ZNF83             | A/G | 19q | A | 0           | 0           |
| rs3826711 | CYP2B6            | C/G | 19q | G | 0           | 0.004504505 |
| rs382789  | KIRREL2           | A/G | 19q | A | 0           | 0           |
| rs398235  | ZNF155            | A/T | 19q | T | 0           | 0.004504505 |
| rs399405  | ZNF780A           | C/T | 19q | C | 0.017857143 | 0.004504504 |
| rs404299  | KIRREL2           | A/G | 19q | A | 0.035714286 | 0.054054054 |
| rs4341855 |                   | A/G | 19q | A | 0.049549549 | 0.044642857 |
| rs435590  | ZNF221            | C/G | 19q | C | 0           | 0           |
| rs4393683 |                   | C/T | 19q | C | 0.049107143 | 0.044642857 |
| rs444172  | ZNF701            | C/T | 19q | T | 0           | 0           |
| rs4467185 | C5AR1             | A/G | 19q | G | 0.013636364 | 0.022727273 |
| rs4606845 |                   | A/G | 19q | A | 0.05        | 0.044642857 |
| rs4801959 | ZNF665            | C/T | 19q | T | 0.040178571 | 0.018018018 |
| rs4802584 | RYR1              | C/G | 19q | G | 0.013513514 | 0.004464286 |
| rs4803932 | HIF3A             | A/G | 19q | A | 0.022522522 | 0.026785714 |
| rs4986771 | ZNF350            | C/T | 19q | C | 0.036036036 | 0.037383178 |
| rs4987042 | ZNF350            | C/T | 19q | C | 0.004464286 | 0           |
| rs4987070 | LIG1              | A/G | 19q | G | 0           | 0.004545455 |
| rs4987181 | LIG1              | C/T | 19q | T | 0           | 0           |
| rs5122    | APOC2             | A/G | 19q | A | 0           | 0           |
| rs588574  | ZNF787            | C/T | 19q | T | 0.008928571 | 0.008928571 |
| rs6413542 | ZNF230            | A/T | 19q | A | 0.017857143 | 0.017857143 |
| rs6509358 | ELSPBP1           | A/G | 19q | A | 0           | 0.004464286 |
| rs6510130 | ZNF544            | C/G | 19q | G | 0.008928571 | 0.032110092 |
| rs671542  |                   | A/G | 19q | A | 0           | 0           |
| rs7245805 |                   | A/G | 19q | G | 0           | 0.004464286 |
| rs7245978 | PSG7              | A/G | 19q | G | 0           | 0           |
| rs7247538 | LILRB2, LOC652626 | A/G | 19q | A | 0           | 0           |
| rs7249154 | LILRA2            | C/G | 19q | C | 0           | 0           |
| rs7249222 | AXL               | A/G | 19q | A | 0.004464286 | 0           |
| rs7249277 |                   | C/G | 19q | G | 0.013392857 | 0.022321429 |
| rs7259581 |                   | C/T | 19q | T | 0           | 0           |
| rs8102548 |                   | A/G | 19q | A | 0           | 0.008928571 |
| rs8104931 | MYBPC2            | A/G | 19q | A | 0           | 0.004464286 |
| rs8105392 |                   | C/T | 19q | C | 0           | 0           |
| rs8105410 |                   | C/T | 19q | C | 0           | 0           |

|            |                |     |     |   |             |             |
|------------|----------------|-----|-----|---|-------------|-------------|
| rs8107576  |                | A/T | 19q | T | 0.036036036 | 0.03125     |
| rs862708   | ZNF304         | C/T | 19q | C | 0.022321429 | 0.035714286 |
| rs9676259  | ZNF530         | A/G | 19q | A | 0           | 0           |
| rs9807853  | ZNF577         | A/T | 19q | A | 0.022321429 | 0.036363636 |
| rs1033545  | ZNF133         | A/T | 20p | A | 0.008928571 | 0           |
| rs10485558 | C20orf23       | A/T | 20p | A | 0.035353535 | 0.035714286 |
| rs10485580 | MGC44328       | A/G | 20p | A | 0           | 0           |
| rs1065191  | SSTR4          | A/C | 20p | C | 0           | 0           |
| rs236150   | CHGB           | C/G | 20p | C | 0.004464286 | 0           |
| rs3188322  | CST1           | A/T | 20p | T | 0           | 0.004504505 |
| rs3746700  | UBOX5, FASTKD5 | A/G | 20p | A | 0           | 0           |
| rs3746782  | C20orf23       | C/G | 20p | C | 0.004464286 | 0           |
| rs3790267  | SLC24A3        | A/G | 20p | A | 0.018018018 | 0.040178571 |
| rs6034717  |                | A/G | 20p | G | 0.004504505 | 0           |
| rs6034718  |                | A/G | 20p | G | 0.004464286 | 0           |
| rs6035618  |                | C/T | 20p | T | 0.017857143 | 0.022321429 |
| rs6048066  | TGM3           | A/C | 20p | C | 0.004504505 | 0           |
| rs6049415  | ZNF343         | A/G | 20p | A | 0           | 0           |
| rs6053968  |                | C/T | 20p | C | 0.008928571 | 0           |
| rs6107308  | ATRN           | A/C | 20p | C | 0           | 0           |
| rs6112031  | LOC388789      | C/T | 20p | T | 0           | 0           |
| rs6133278  | CHGB           | A/G | 20p | A | 0.022321429 | 0.013392857 |
| rs6139873  | CHGB           | A/G | 20p | A | 0.017857143 | 0.008928571 |
| rs671650   | SIGLEC1        | G/T | 20p | G | 0           | 0           |
| rs7260784  | ANKRD5         | A/C | 20p | A | 0           | 0           |
| rs8121401  | SLC24A3        | A/T | 20p | A | 0.013392857 | 0           |
| rs8123195  | C20orf23       | C/T | 20p | C | 0.008928571 | 0.004464286 |
| rs910241   |                | A/G | 20p | A | 0.03125     | 0.013392857 |
| rs934335   | SPTLC3         | C/G | 20p | G | 0.00990099  | 0.005376344 |
| rs999409   | UBOX5          | A/G | 20p | A | 0           | 0.004464286 |
| rs10036    | DYNLRB1        | A/T | 20q | A | 0           | 0           |
| rs1054349  | C20orf106      | A/T | 20q | A | 0           | 0           |
| rs1054361  | C20orf106      | A/G | 20q | A | 0.004464286 | 0           |
| rs11569321 | CD40           | C/T | 20q | T | 0           | 0           |
| rs11569636 | PLTP           | A/C | 20q | A | 0           | 0           |
| rs1557202  |                | C/T | 20q | T | 0           | 0           |
| rs1800961  | HNF4A          | C/T | 20q | T | 0.026785714 | 0.031531532 |

|           |                   |     |     |   |             |             |
|-----------|-------------------|-----|-----|---|-------------|-------------|
| rs1804160 | PCK1              | A/G | 20q | A | 0.027027027 | 0.049549549 |
| rs194998  | CDH26             | G/T | 20q | T | 0           | 0           |
| rs2071650 | SEMG2             | C/G | 20q | C | 0.040178571 | 0.03125     |
| rs2184436 |                   | A/G | 20q | G | 0.022321429 | 0.044642857 |
| rs2231838 | SPINLW1           | A/G | 20q | G | 0.013392857 | 0           |
| rs2232585 | LBP               | A/C | 20q | A | 0           | 0.008928571 |
| rs2232607 | LBP               | A/G | 20q | G | 0.017857143 | 0.022727273 |
| rs2273086 | B4GALT5           | C/T | 20q | T | 0.013513514 | 0.013513514 |
| rs2273534 | TMEPAI            | C/T | 20q | C | 0.049107143 | 0.053571429 |
| rs2296151 | ASIP              | A/G | 20q | G | 0           | 0           |
| rs235035  | B4GALT5           | C/T | 20q | C | 0           | 0           |
| rs2427394 |                   | C/T | 20q | C | 0.049107143 | 0.017857143 |
| rs2865394 | ZBP1              | C/T | 20q | T | 0.013392857 | 0.008928571 |
| rs2892179 | CDH4              | G/T | 20q | G | 0.036036036 | 0.066964286 |
| rs3746500 | ZSWIM1            | A/G | 20q | A | 0.013392857 | 0.027027027 |
| rs3752289 | ACTR5             | C/T | 20q | T | 0           | 0           |
| rs3827040 | C20orf165, NEURL2 | A/G | 20q | A | 0.004464286 | 0.008928571 |
| rs4809443 |                   | G/T | 20q | T | 0.049107143 | 0.045045045 |
| rs4925229 | LAMA5             | C/T | 20q | T | 0.022321429 | 0.031531532 |
| rs4988492 | GHRH              | A/G | 20q | A | 0.017857143 | 0.018018018 |
| rs5622    | PTGIS             | A/T | 20q | A | 0.004464286 | 0.017857143 |
| rs5741804 | BPI               | C/T | 20q | T | 0.049107143 | 0.040178571 |
| rs5741809 | BPI               | A/G | 20q | G | 0           | 0.017857143 |
| rs5744204 | LBP               | A/G | 20q | A | 0.03125     | 0.022321429 |
| rs5744212 | LBP               | C/T | 20q | T | 0.018018018 | 0           |
| rs6011853 |                   | C/T | 20q | T | 0.035714286 | 0.053571429 |
| rs6022903 | BCAS1             | C/T | 20q | T | 0.035714286 | 0.049107143 |
| rs6060022 | NCOA6             | C/T | 20q | C | 0.008928571 | 0           |
| rs6060487 |                   | A/C | 20q | C | 0           | 0           |
| rs6091179 | C20orf175         | C/T | 20q | T | 0.035714286 | 0.013392857 |
| rs6100712 |                   | C/T | 20q | T | 0.03125     | 0.013513514 |
| rs6120140 | C20orf70          | C/T | 20q | T | 0           | 0           |
| rs6120221 | C20orf114         | C/T | 20q | C | 0.004464286 | 0.004464286 |
| rs6120222 | C20orf114         | G/T | 20q | T | 0           | 0.004464286 |
| rs6129706 |                   | A/G | 20q | A | 0           | 0           |
| rs707554  | C20orf106         | C/T | 20q | C | 0           | 0           |
| rs7264544 | KCNS1             | C/T | 20q | C | 0           | 0           |

|            |                      |     |     |   |             |             |
|------------|----------------------|-----|-----|---|-------------|-------------|
| rs7273698  | CD40                 | C/T | 20q | T | 0           | 0           |
| rs750077   | DIDO1                | C/G | 20q | G | 0.013636364 | 0.027522936 |
| rs751887   | MMP24                | C/T | 20q | T | 0           | 0           |
| rs754511   | MYH7B                | A/T | 20q | T | 0.004545455 | 0.008928571 |
| rs11088674 | PRSS7                | G/T | 21q | G | 0.004464286 | 0           |
| rs11911404 |                      | A/C | 21q | C | 0           | 0.004716981 |
| rs1810385  | LOC391282, LOC652167 | A/C | 21q | A | 0           | 0           |
| rs2070417  | TIAM1                | A/C | 21q | A | 0.009174312 | 0           |
| rs2070418  | TIAM1                | C/T | 21q | T | 0           | 0           |
| rs2230454  | MX1                  | G/T | 21q | T | 0           | 0           |
| rs2250977  | C21orf25             | A/G | 21q | A | 0.022522522 | 0.02293578  |
| rs2276231  | PIGP                 | G/T | 21q | G | 0           | 0.00462963  |
| rs2298697  | MCM3AP               | A/G | 21q | A | 0           | 0           |
| rs2824494  | C21orf91             | A/G | 21q | G | 0.004464286 | 0.004464286 |
| rs2836172  | DSCR8                | A/T | 21q | T | 0.022321429 | 0.004464286 |
| rs2838095  | C21orf129            | G/T | 21q | T | 0.044642857 | 0.04954955  |
| rs2838497  | C21orf33             | C/G | 21q | G | 0.022321429 | 0           |
| rs2839421  | C21orf25             | A/G | 21q | G | 0.049107143 | 0.035714286 |
| rs363504   | GRIK1                | C/T | 21q | C | 0.044642857 | 0.058035714 |
| rs3746843  | C21orf7              | A/G | 21q | G | 0           | 0           |
| rs3746875  | KCNJ15               | A/C | 21q | C | 0           | 0           |
| rs3819158  | PRDM15               | C/T | 21q | T | 0           | 0           |
| rs3827268  | PCBP3                | A/G | 21q | A | 0.049549549 | 0.107142857 |
| rs456067   | LOC388813, LOC651327 | C/T | 21q | T | 0           | 0           |
| rs4986956  | IFNAR2               | C/T | 21q | C | 0.020618557 | 0.033653846 |
| rs4987121  | CBR3                 | A/T | 21q | T | 0           | 0           |
| rs6517549  | SH3BGR               | A/G | 21q | G | 0.040178571 | 0.017857143 |
| rs6570     | ITGB2                | C/G | 21q | C | 0.00462963  | 0           |
| rs685967   | CLDN8                | A/G | 21q | G | 0.035714286 | 0.045045045 |
| rs7275364  |                      | A/G | 21q | G | 0           | 0           |
| rs7279142  | KRTAP19-8, LOC731574 | C/T | 21q | T | 0           | 0           |
| rs7283442  | LIPI                 | A/T | 21q | T | 0           | 0           |
| rs7283632  | COL18A1              | C/T | 21q | T | 0           | 0           |
| rs7510165  | FLJ41733             | C/T | 21q | T | 0           | 0           |
| rs8131539  | KRTAP20-2            | A/G | 21q | G | 0           | 0           |
| rs8132705  | KRTAP20-2            | C/T | 21q | C | 0           | 0           |
| rs8132721  | KRTAP20-2            | G/T | 21q | G | 0           | 0.004464286 |

|            |                 |     |     |   |             |             |
|------------|-----------------|-----|-----|---|-------------|-------------|
| rs884134   | C21orf56        | A/G | 21q | A | 0           | 0.004464286 |
| rs915836   | ZNF295          | C/T | 21q | T | 0           | 0           |
| rs928302   | TMPRSS3         | C/T | 21q | T | 0.044642857 | 0.0625      |
| rs999597   | KRTAP13-4       | C/T | 21q | T | 0.026785714 | 0.044642857 |
| rs1042311  | PPARA           | C/T | 22q | T | 0.008928571 | 0.004464286 |
| rs1046166  | LARGE           | A/G | 22q | A | 0.027472527 | 0.01744186  |
| rs11551    | FBLN1           | G/T | 22q | T | 0           | 0.004545455 |
| rs11570606 | PLA2G6          | A/G | 22q | G | 0           | 0.009009009 |
| rs11705259 | CCDC116         | A/G | 22q | A | 0.03125     | 0.009090909 |
| rs13268    | FBLN1           | A/G | 22q | G | 0.013513514 | 0.013636364 |
| rs132736   | APOL4           | C/T | 22q | C | 0           | 0           |
| rs139300   | APOBEC3H        | A/G | 22q | A | 0.013392857 | 0           |
| rs140079   |                 | A/G | 22q | A | 0.045045045 | 0.0625      |
| rs1475853  | PIWIL3          | C/T | 22q | T | 0.040178571 | 0.022321429 |
| rs1800204  | PPARA           | A/G | 22q | A | 0           | 0           |
| rs1803323  | ATF4            | C/G | 22q | G | 0           | 0           |
| rs2070507  | PPM1F           | A/C | 22q | C | 0.031531532 | 0.040178571 |
| rs2073738  | CLTCL1          | A/G | 22q | A | 0.022321429 | 0.013513513 |
| rs2076051  | BPIL2           | A/G | 22q | G | 0.013513514 | 0.009009009 |
| rs2234331  | TUBA8           | C/T | 22q | T | 0           | 0           |
| rs2234953  | GSTT1           | A/G | 22q | A | 0.005       | 0           |
| rs2235171  | SLC5A4          | C/T | 22q | T | 0.035714286 | 0.03125     |
| rs2241029  |                 | C/T | 22q | T | 0           | 0           |
| rs2269619  | XPNPEP3, DNAJB7 | G/T | 22q | G | 0.013636364 | 0           |
| rs2277846  | L3MBTL2         | C/T | 22q | T | 0           | 0           |
| rs2330837  | GGT1            | C/T | 22q | T | 0           | 0           |
| rs2982055  |                 | C/T | 22q | C | 0.028037383 | 0.022321429 |
| rs3747258  | CERK            | A/G | 22q | A | 0.03125     | 0.058035714 |
| rs42942    | PES1            | A/T | 22q | A | 0.044642857 | 0.053571429 |
| rs4820889  | TCN2            | A/G | 22q | A | 0.009009009 | 0.026785714 |
| rs4822557  | CTA-221G9.4     | A/G | 22q | A | 0           | 0           |
| rs4822558  | CTA-221G9.4     | A/C | 22q | A | 0           | 0           |
| rs4823054  | ASCC2           | C/T | 22q | T | 0.049107143 | 0.049107143 |
| rs5753700  | SFI1            | C/T | 22q | T | 0.035714286 | 0.040178571 |
| rs5761170  | MYO18B          | C/T | 22q | T | 0.013636364 | 0.013513514 |
| rs5761405  | SEZ6L           | A/G | 22q | G | 0.040540541 | 0.035714286 |
| rs5904     | SERPIND1, PI4KA | C/T | 22q | T | 0           | 0           |

|            |                      |     |     |   |             |             |
|------------|----------------------|-----|-----|---|-------------|-------------|
| rs5905     | SERPIND1, PI4KA      | A/G | 22q | A | 0           | 0.004545454 |
| rs5992128  | MICAL3, LOC729269    | G/T | 22q | G | 0.026785714 | 0.040178571 |
| rs5999613  |                      | A/G | 22q | A | 0.026785714 | 0.031531531 |
| rs6004319  | SGSM1                | A/T | 22q | T | 0           | 0           |
| rs6004320  | SGSM1                | C/T | 22q | T | 0           | 0           |
| rs6004350  | SGSM1                | A/C | 22q | C | 0           | 0           |
| rs6004579  | LOC729882, LOC731692 | A/G | 22q | A | 0           | 0.004545454 |
| rs6008794  | CELSR1               | A/G | 22q | G | 0           | 0           |
| rs6009989  | LOC644186            | A/G | 22q | G | 0.017857143 | 0.027027027 |
| rs714136   | C22orf31             | C/G | 22q | G | 0           | 0           |
| rs7284177  | MYO18B               | A/G | 22q | A | 0.035714286 | 0.022321429 |
| rs7288201  | GGTLA1               | C/T | 22q | C | 0.03125     | 0.008928571 |
| rs7290117  | ZNRF3                | C/T | 22q | T | 0           | 0.008928571 |
| rs742021   |                      | A/G | 22q | A | 0.026595745 | 0.036842105 |
| rs8138516  | DEPDC5               | C/G | 22q | C | 0           | 0           |
| rs8142666  | MTMR3                | C/T | 22q | T | 0           | 0           |
| rs8192548  | MFNG                 | C/T | 22q | T | 0.022321429 | 0.022321429 |
| rs9625679  | C22orf31             | A/G | 22q | G | 0.018867925 | 0.028037383 |
| rs1047037  | FAM104B              | A/G | Xp  | A |             |             |
| rs10521938 |                      | A/C | Xp  | C |             |             |
| rs1058239  | VCX2, VCX3A          | C/G | Xp  | C |             |             |
| rs11094694 |                      | A/G | Xp  | A |             |             |
| rs1132201  | CXorf36              | A/G | Xp  | A |             |             |
| rs12012704 | AKAP4                | C/G | Xp  | C |             |             |
| rs1207580  |                      | A/G | Xp  | A |             |             |
| rs12689461 | MAGED1               | A/C | Xp  | A |             |             |
| rs12689863 | SHROOM4              | A/G | Xp  | A |             |             |
| rs1368769  | MAGEB10              | C/T | Xp  | T |             |             |
| rs1410961  | MAGEB16              | C/T | Xp  | C |             |             |
| rs1635242  | MXRA5                | C/T | Xp  | C |             |             |
| rs1635246  | MXRA5                | A/G | Xp  | G |             |             |
| rs1726199  | MXRA5                | A/G | Xp  | G |             |             |
| rs1726208  | MXRA5                | C/G | Xp  | C |             |             |
| rs1800275  | DMD                  | A/C | Xp  | C |             |             |
| rs1800280  | DMD                  | A/G | Xp  | G |             |             |
| rs1801187  | DMD                  | A/G | Xp  | A |             |             |
| rs1997639  | ELK1                 | C/T | Xp  | T |             |             |



|           |              |     |    |   |
|-----------|--------------|-----|----|---|
| rs2009742 | LOC644969    | A/G | Xp | A |
| rs2071309 | MAGEB3       | C/T | Xp | T |
| rs2071848 | NHS          | A/T | Xp | T |
| rs2073942 | SHROOM2      | C/G | Xp | C |
| rs211648  | ARSD         | C/G | Xp | G |
| rs228406  | DMD          | C/T | Xp | T |
| rs2306734 | GYG2         | C/T | Xp | C |
| rs2306735 | GYG2         | A/G | Xp | A |
| rs235824  | WDR13        | G/T | Xp | G |
| rs2375465 | FOXR2        | C/T | Xp | T |
| rs2707164 | CXorf58      | A/G | Xp | G |
| rs3747295 | NHS          | C/T | Xp | C |
| rs3764880 | TLR8         | A/G | Xp | G |
| rs4412516 | DDX53        | C/T | Xp | C |
| rs4826381 | PAGE3        | C/T | Xp | T |
| rs4829392 | MAGEB16      | C/T | Xp | C |
| rs5744077 | TLR8         | A/G | Xp | G |
| rs5906091 |              | A/T | Xp | A |
| rs5909118 | MAP3K15      | A/T | Xp | T |
| rs5909299 | MAP3K15      | C/T | Xp | C |
| rs5909301 | MAP3K15      | A/T | Xp | T |
| rs5926203 | DDX53        | G/T | Xp | T |
| rs5934089 |              | C/T | Xp | C |
| rs5935650 | MGC17403     | G/T | Xp | G |
| rs5943854 | MAGEB6B      | A/G | Xp | G |
| rs5951426 | ZNF645       | G/T | Xp | T |
| rs5952474 | SSX6, SPACA5 | C/T | Xp | T |
| rs5969783 | CXorf15      | A/G | Xp | G |
| rs5973488 | MAGEB16      | A/G | Xp | A |
| rs5973603 |              | A/G | Xp | A |
| rs5983119 | MXRA5        | C/T | Xp | T |
| rs6521112 | ZNF673       | C/G | Xp | G |
| rs6527569 | CXorf30      | A/G | Xp | G |
| rs6629430 |              | A/G | Xp | A |
| rs7059433 | LOC139249    | A/C | Xp | C |
| rs7064096 | GAGE12J      | A/G | Xp | G |
| rs7066976 |              | C/T | Xp | C |

|            |                  |     |    |   |
|------------|------------------|-----|----|---|
| rs723119   | WASF4, LOC647909 | A/G | Xp | G |
| rs7357825  | MAGEB6B          | A/G | Xp | A |
| rs7883609  | DGKK             | A/G | Xp | A |
| rs7887327  |                  | C/T | Xp | T |
| rs8177068  | CFP              | A/G | Xp | A |
| rs909713   | WASF4, LOC647909 | G/T | Xp | T |
| rs10127175 | IRAK1            | A/T | Xq | T |
| rs1045686  | NAP1L3, FAM133A  | C/G | Xq | C |
| rs1046488  | KIF4A            | C/G | Xq | C |
| rs1047251  | MAGEA4           | A/G | Xq | G |
| rs1050086  |                  | A/G | Xq | A |
| rs1055497  | MAP7D3           | G/T | Xq | T |
| rs11095909 | MAGEC3           | C/T | Xq | C |
| rs1113265  | FAM46D           | C/G | Xq | C |
| rs1129980  | GPC4             | G/T | Xq | T |
| rs1190736  | GPR101           | A/C | Xq | A |
| rs1198711  |                  | C/T | Xq | T |
| rs12008095 | GUCY2F           | A/G | Xq | G |
| rs12009847 | TCEAL3           | C/G | Xq | G |
| rs12013711 | CAPN6            | C/G | Xq | G |
| rs12688415 | CHRD1            | C/T | Xq | T |
| rs1298577  | NUP62CL          | A/G | Xq | G |
| rs1343879  | MAGEE2           | A/C | Xq | A |
| rs1382533  |                  | C/T | Xq | C |
| rs1385699  | EDA2R            | C/T | Xq | C |
| rs1467881  | ZNF275           | C/G | Xq | G |
| rs1727458  |                  | A/C | Xq | A |
| rs176024   | MAGEC3           | A/G | Xq | G |
| rs1802288  | TSPAN6           | A/G | Xq | A |
| rs1804495  | SERPINA7         | G/T | Xq | T |
| rs1894359  | CSAG1            | A/T | Xq | T |
| rs1894360  | CSAG1            | C/G | Xq | G |
| rs2048366  |                  | A/G | Xq | G |
| rs2070818  | EMD              | C/G | Xq | C |
| rs2071033  |                  | C/T | Xq | T |
| rs2071306  |                  | G/T | Xq | T |
| rs2071756  | NOX1             | C/T | Xq | T |

|           |                    |     |    |   |
|-----------|--------------------|-----|----|---|
| rs2071913 | HTATSF1            | C/G | Xq | G |
| rs2072452 | ATP1B4             | C/T | Xq | C |
| rs2073043 | CXorf6             | A/G | Xq | G |
| rs217940  |                    | C/T | Xq | C |
| rs2179675 | BHLHB9             | A/G | Xq | G |
| rs2213591 | ODZ1               | C/T | Xq | C |
| rs2239834 | LOC645188          | A/G | Xq | G |
| rs2266890 | TMEM187            | C/T | Xq | T |
| rs2272925 | GUCY2F             | G/T | Xq | T |
| rs2290380 | TGIF2LX, LOC730419 | A/G | Xq | G |
| rs2295336 | SLITRK2            | C/T | Xq | C |
| rs2305570 | RP13-347D8.3       | A/G | Xq | G |
| rs2460511 |                    | C/G | Xq | C |
| rs2475424 |                    | C/T | Xq | C |
| rs2475425 |                    | G/T | Xq | T |
| rs2503369 |                    | A/G | Xq | G |
| rs2503370 |                    | C/G | Xq | C |
| rs261663  |                    | C/T | Xq | T |
| rs2642219 | DIAPH2, RPA4       | C/T | Xq | T |
| rs2728534 | DKC1               | G/T | Xq | G |
| rs3012627 | CITED1             | C/G | Xq | C |
| rs3027571 |                    | C/G | Xq | C |
| rs3027910 | MECP2              | A/G | Xq | A |
| rs3115758 | APLN               | G/T | Xq | T |
| rs3122407 | BRWD3              | C/T | Xq | T |
| rs3747406 |                    | C/T | Xq | C |
| rs3752359 | CXorf1             | G/T | Xq | G |
| rs3761592 | RP13-347D8.3       | A/T | Xq | T |
| rs3810651 | GABRQ              | A/T | Xq | T |
| rs3810713 |                    | C/G | Xq | C |
| rs3810715 | FATE1              | A/G | Xq | A |
| rs3810755 | SLC25A43           | A/G | Xq | G |
| rs3827440 | GPR174             | A/G | Xq | A |
| rs4252205 | PCDH11X            | A/G | Xq | A |
| rs4289953 |                    | C/T | Xq | C |
| rs4623583 |                    | A/G | Xq | A |
| rs4827909 |                    | A/G | Xq | G |

|           |              |     |    |   |
|-----------|--------------|-----|----|---|
| rs4829799 | SAGE1        | C/T | Xq | C |
| rs4829829 | GPR112       | A/G | Xq | G |
| rs4907817 |              | C/T | Xq | T |
| rs502209  | GUCY2F       | A/G | Xq | G |
| rs572013  | VBP1         | C/T | Xq | T |
| rs5911634 |              | A/C | Xq | A |
| rs5911810 |              | C/T | Xq | C |
| rs5920607 |              | A/G | Xq | A |
| rs5924658 | PASD1        | C/G | Xq | G |
| rs5930506 |              | C/T | Xq | C |
| rs5930931 | GPR112       | A/C | Xq | A |
| rs5930932 | GPR112       | C/T | Xq | C |
| rs5931046 | GPR101       | A/G | Xq | G |
| rs5940915 | CPXCR1       | A/C | Xq | A |
| rs5951328 | TAF7L        | A/G | Xq | A |
| rs5951332 | ARMCX4       | A/G | Xq | A |
| rs5953851 | SPANXN3      | C/T | Xq | T |
| rs5955139 | RP11-35F15.2 | A/G | Xq | A |
| rs5991935 |              | A/G | Xq | A |
| rs6048    | F9           | A/G | Xq | G |
| rs6525433 | TEX11        | C/T | Xq | C |
| rs6525447 | SLC7A3       | C/G | Xq | C |
| rs6526155 | PNMA3        | C/T | Xq | T |
| rs655415  | OR13H1       | A/C | Xq | A |
| rs6568050 | ZCCHC16      | C/T | Xq | C |
| rs6627242 |              | C/T | Xq | C |
| rs6648942 |              | G/T | Xq | T |
| rs6655782 | STAG2        | G/T | Xq | G |
| rs7058353 | PIN4         | A/C | Xq | C |
| rs7058824 |              | A/G | Xq | G |
| rs709036  | BEX1         | C/T | Xq | T |
| rs714147  | CNGA2        | A/G | Xq | A |
| rs764631  | FMR1NB       | C/T | Xq | T |
| rs7879053 |              | C/T | Xq | T |
| rs7881332 | FLJ44635     | C/T | Xq | C |
| rs7881794 |              | G/T | Xq | G |
| rs7884806 | FLJ44635     | C/T | Xq | T |

|          |        |     |    |   |
|----------|--------|-----|----|---|
| rs912002 | GPR112 | C/T | Xq | C |
|----------|--------|-----|----|---|

\* P-values were derived from unconditional logistic regression assuming a log-additive model. P-values were not calculated for single nucleotide polymorphisms with a minor allele frequency < 5% or those on the X chromosome.
